# Supplementary material for: Selective dephosphorylation by PP2A-B55 directs the meiosis I-meiosis II transition in oocytes
Source: eLife journal article supplement (doi:10.7554/elife.70588), 2021-08-03

Figure 2-S2-source data

3:00  
Duplicate 1      Duplicate 2  
(used for figure)      3:10  
Control      Control      Control  
CyCA      CyCA      CyCA  
CycB      CycB

3:00  
Duplicate 1      Duplicate 2  
(used for figure)      3:10  
Control      Control      Control  
CyCA      CyCA      CyCA  
CycB      CycB

pTPxK

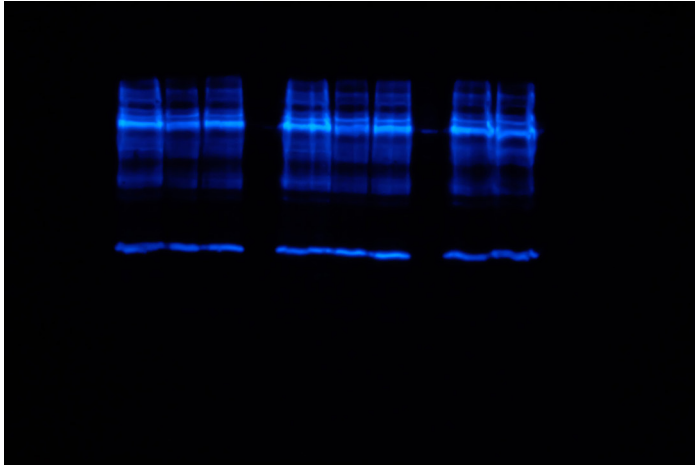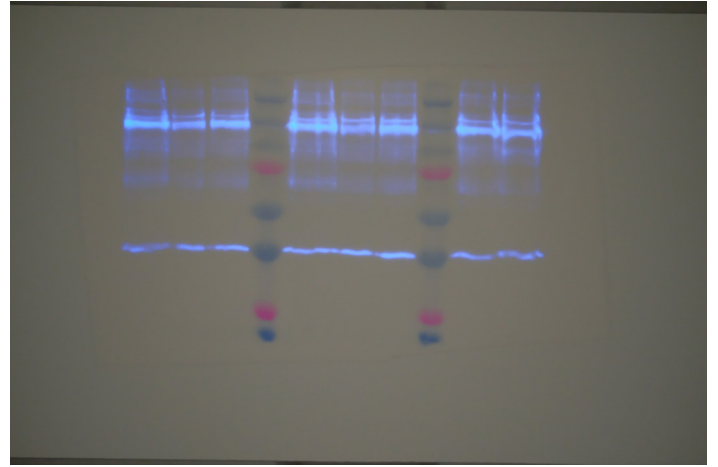

Reprobed CycB  
\* CycB band

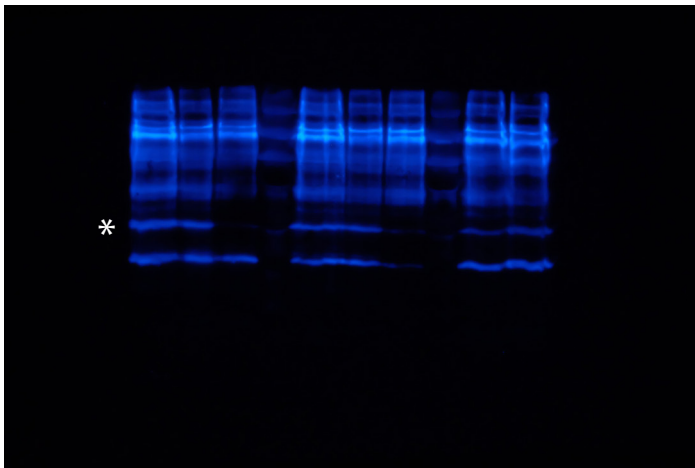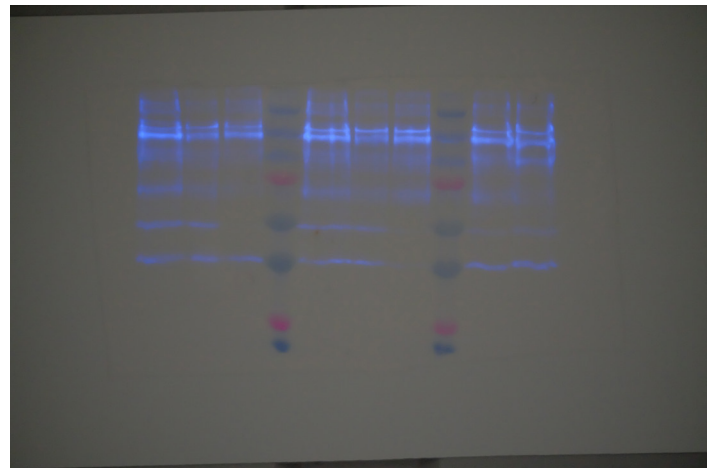

Reprobed alpha tub

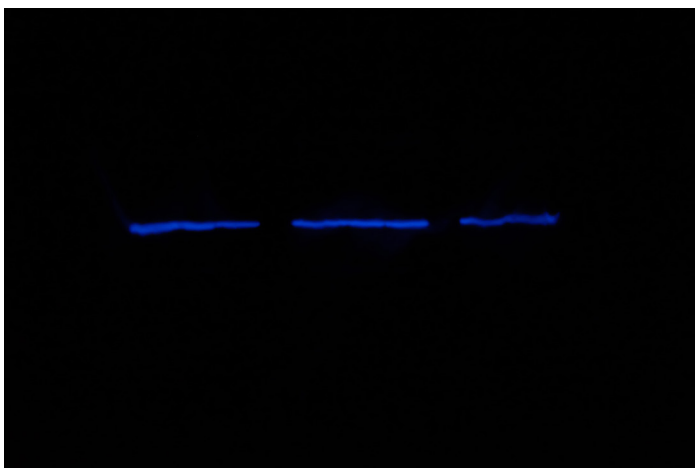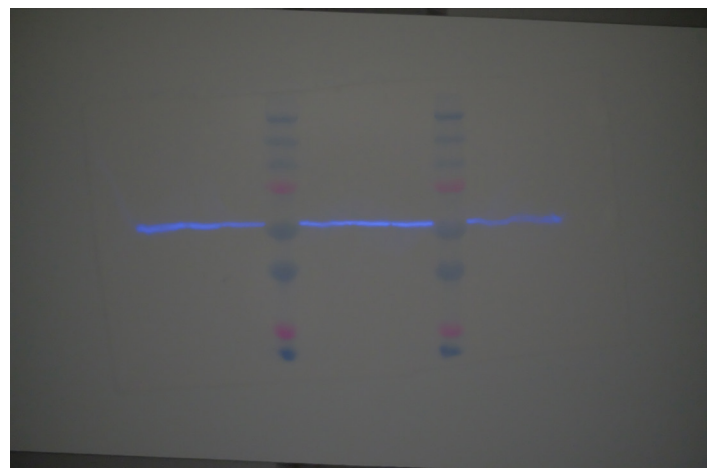

Supplement: fig2-figsupp2-data1 [file elife-70588-fig2-figsupp2-data1-v2.pdf]
