# Supplementary material for: Selective dephosphorylation by PP2A-B55 directs the meiosis I-meiosis II transition in oocytes
Source: eLife journal article supplement (doi:10.7554/elife.70588), 2021-08-03
Supplement: fig3-figsupp4-data1 [file elife-70588-fig3-figsupp4-data1-v2.pdf]

Figure 3-S4-source data

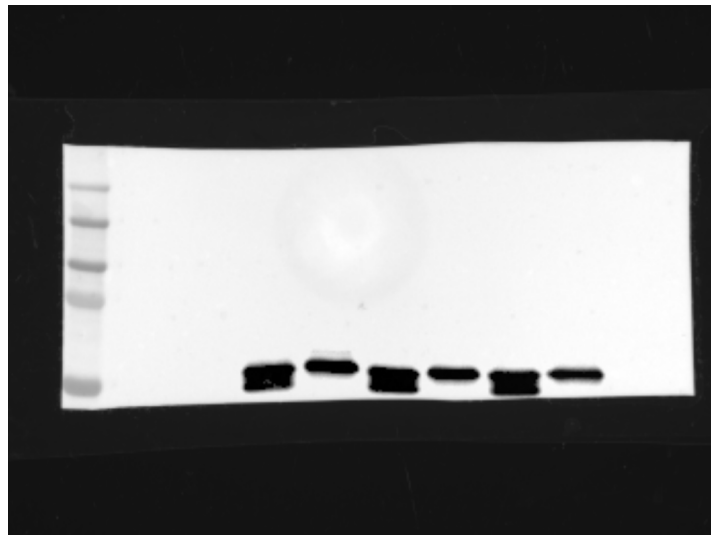

NIPP1-Flag

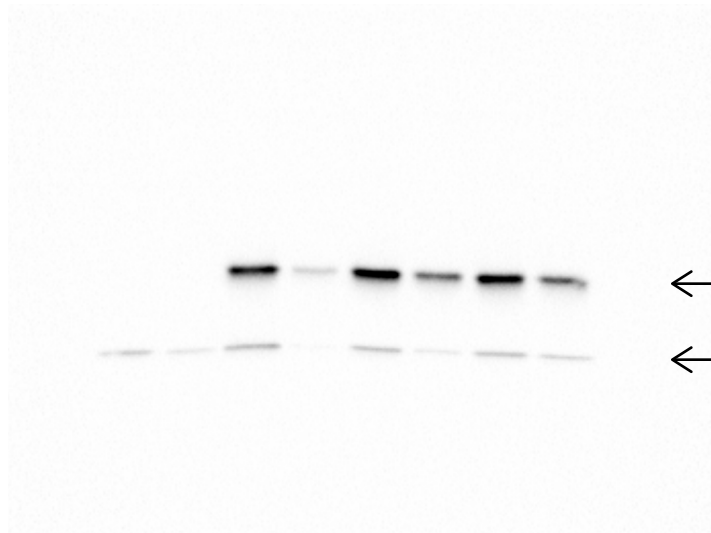

← PP1

← non-specific
