# Supplementary material for: Selective dephosphorylation by PP2A-B55 directs the meiosis I-meiosis II transition in oocytes
Source: eLife journal article supplement (doi:10.7554/elife.70588), 2021-08-03

Figure 4-S1-source data

Prophase I  
GVBD  
0 30 45 55 65  
Meta I 75 85 95 105 115 125  
Ana I 135 145 155 165  
Meta II  
Ana II  
Pronucleus

pSP1

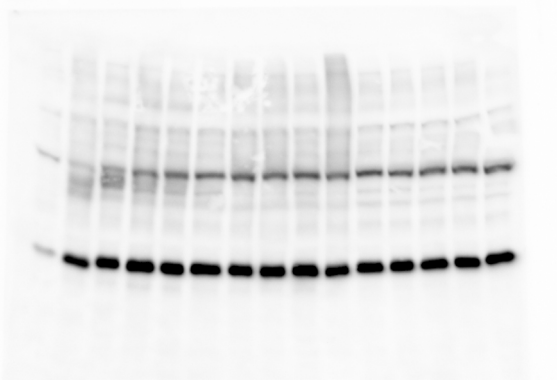

Prophase I  
GVBD  
0 30 45 55 65  
Meta I 75 85 95 105 115 125  
Ana I 135 145 155 165  
Meta II  
Ana II  
Pronucleus

ponceau

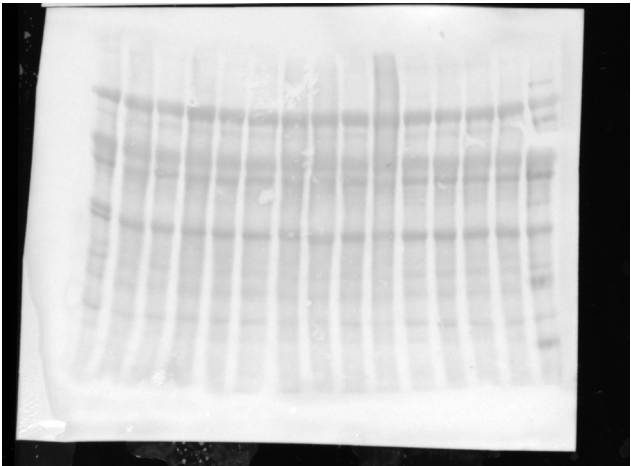

pSP2

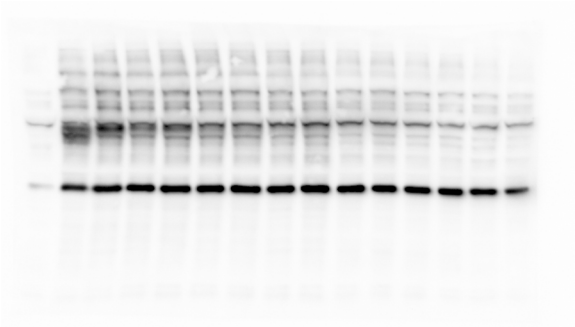

ponceau

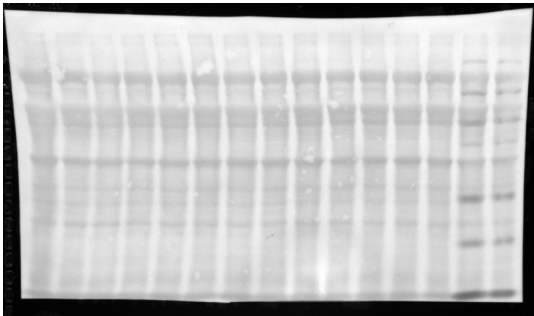

pSP3

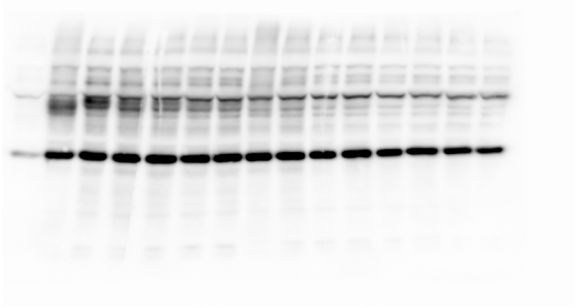

ponceau

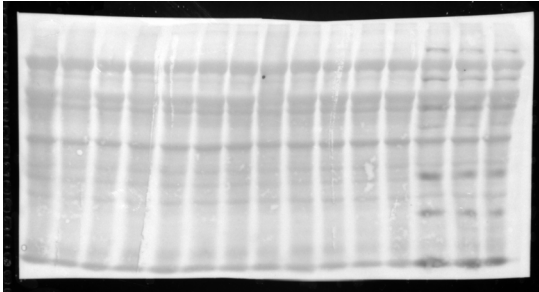

Supplement: fig4-figsupp1-data1 [file elife-70588-fig4-figsupp1-data1-v2.zip]
