# Supplementary material for: Selective dephosphorylation by PP2A-B55 directs the meiosis I-meiosis II transition in oocytes
Source: eLife journal article supplement (doi:10.7554/elife.70588), 2021-08-03
Supplement: fig4-figsupp2-data1 [file elife-70588-fig4-figsupp2-data1-v2.pdf]

Figure 4-S2-source data

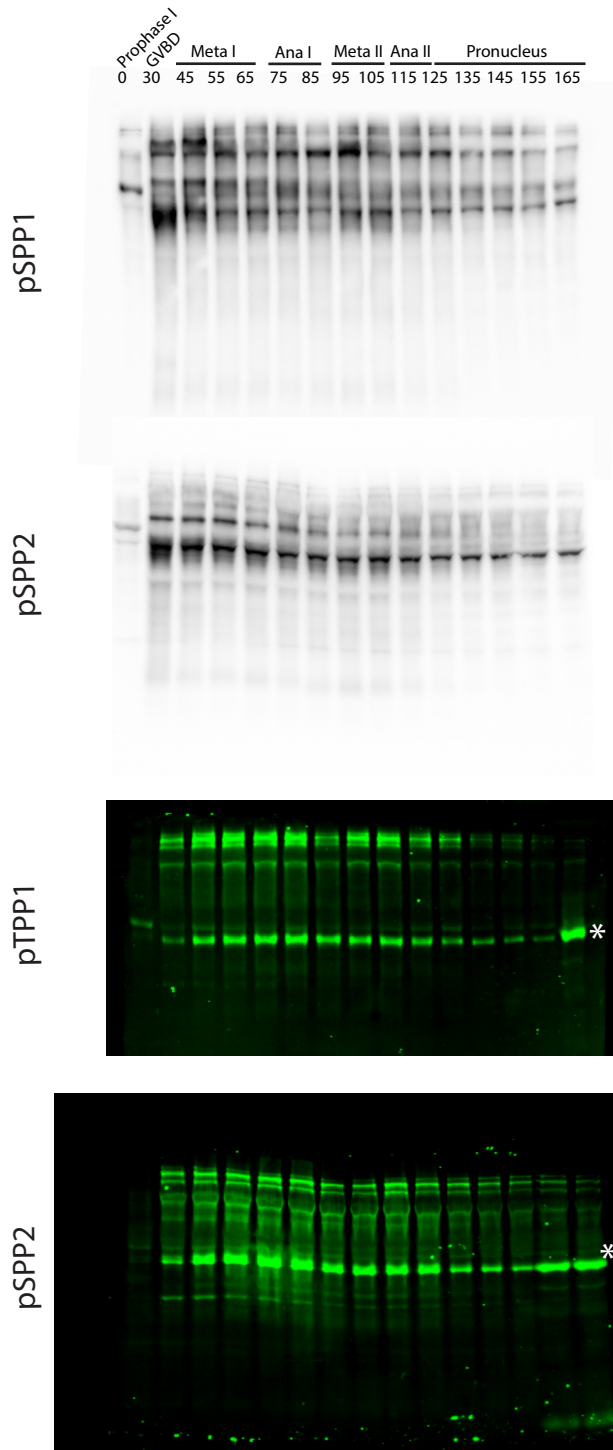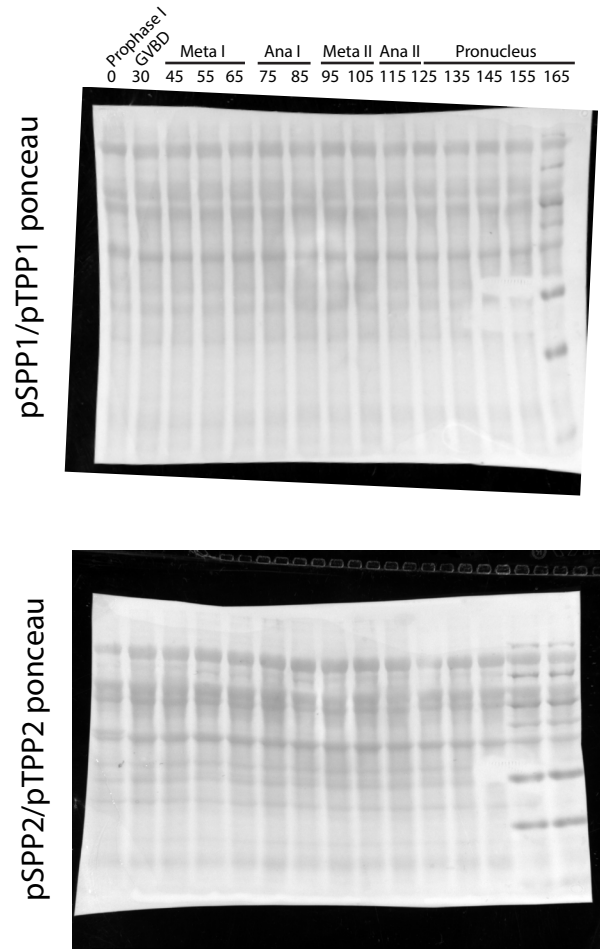

\* indicates protein ladder crossreacted with antibodies
