# Supplementary material for: Selective dephosphorylation by PP2A-B55 directs the meiosis I-meiosis II transition in oocytes
Source: eLife. 2021 Aug 3;10:e70588. doi: 10.7554/eLife.70588 (PMC8370769; doi:10.7554/eLife.70588)
Supplement: Supplementary file 1. [file elife-70588-supp1.xlsx]

## Sheet: Supp File 1
Column	description
name	protein name
accession	protein accession
description	protein description
group_id	protein group identifier
group_um
xcorr_max	maximum xcorr parameter for protein identification
dcn_max	maximum dcn parameter for protein identification
ppm_min	minimum part per million parameter for protein identification
tp[1]	total peptide count multiplex 1
up[1]	unique peptide count multiplex 1
um[1]	unique match count multiplex 1
rp[1]	razor peptide count multiplex 1
tp[2]	total peptide count multiplex 2
up[2]	unique peptide count multiplex 2
um[2]	unique match count multiplex 2
rp[2]	razor peptide count multiplex 2
tp[3]	total peptide count multiplex 3
up[3]	unique peptide count multiplex 3
um[3]	unique match count multiplex 3
rp[3]	razor peptide count multiplex 3
average norm TMT intensity prophase1	average summed normalized TMT reporter ion intensity for indicated protein in prophase 1
average norm TMT intensity GVBD	average summed normalized TMT reporter ion intensity for indicated protein in GVBD
average norm TMT intensity M1	average summed normalized TMT reporter ion intensity for indicated protein in M1
average norm TMT intensity M2	average summed normalized TMT reporter ion intensity for indicated protein in M2
average norm TMT intensity 2pn	average summed normalized TMT reporter ion intensity for indicated protein in 2pn
average norm TMT intensity FC	average summed normalized TMT reporter ion intensity for indicated protein in FC
max. protein abundance fold-change	maximum protein abundance fold-change
average TMT intensity prophase1	average summed TMT reporter ion intensity for indicated protein in prophase 1
average TMT intensity GVBD	average summed TMT reporter ion intensity for indicated protein in GVBD
average TMT intensity M1	average summed TMT reporter ion intensity for indicated protein in M1
average TMT intensity M2	average summed TMT reporter ion intensity for indicated protein in M2
average TMT intensity 2pn	average summed TMT reporter ion intensity for indicated protein in 2pn
average TMT intensity FC	average summed TMT reporter ion intensity for indicated protein in FC
Pearson correlation	Pearson correlation coefficient of normalized TMT reporter ion intentsities between multiplxes
pvalue	pvalue of Pearson correlation coefficient

## Sheet: all data
name	accession	description	group_id	group_um	xcorr_max	dcn_max	ppm_min	tp[1]	up[1]	um[1]	rp[1]	tp[2]	up[2]	um[2]	rp[2]	tp[3]	up[3]	um[3]	rp[3]	average norm TMT intensity prophase1	average norm TMT intensity GVBD	average norm TMT intensity M1	average norm TMT intensity M2	average norm TMT intensity 2pn	average norm TMT intensity FC	max. protein abundance fold-change	average TMT intensity prophase1	average TMT intensity GVBD	average TMT intensity M1	average TMT intensity M2	average TMT intensity 2pn	average TMT intensity FC	Pearson correlation coefficient	pvalue
PMI_020281,PMI_017635,m.44124,m.16618	None,None,66226,Pmi_609170_n	XP_022098740.1 uncharacterized protein LOC110983634 isoform X1 [Acanthaster planci] (id=78.64%; len=440; e=0.00E+00) ,XP_022098740.1 uncharacterized protein LOC110983634 isoform X1 [Acanthaster planci] (id=78.85%; len=435; e=0.00E+00) ,XP_022098740.1 uncharacterized protein LOC110983634 isoform X1 [Acanthaster planci] (id=78.46%; len=441; e=0.00E+00) ,no_annot	540	2	3.041	0.3775	0.478498	1	1	0	0	1	1	0	0	1	1	0	0	0.659454	0.760201	0.885699	1	0.658806	0.769835	1.5179	14448.8	15230	20187	19957.4	13046.3	15441.5	1	0	3
m.55801	83107	XP_022085984.1 cubilin-like isoform X1 [Acanthaster planci] (id=60.96%; len=415; e=5.93E-159)			3.558	0.5462	0.063404	5	5	0	4					7	6	0	5	0.997788	0.975372	0.316108	0.26838	0.273766	0.271849	3.71782	3.64002e+06	3.55043e+06	1.15678e+06	984499	1.00112e+06	991200	0.998169	5.02351e-06	2
m.55802	83108	XP_022085986.1 cubilin-like isoform X3 [Acanthaster planci] (id=61.92%; len=407; e=2.20E-158)			4.124	0.5462	0.007388	7	6	0	5	7	5	0	5	9	7	0	5	0.97692	0.985418	0.294019	0.264177	0.272852	0.264431	3.73014	3.19085e+06	3.21249e+06	961081	865887	892893	863467	0.997923	6.46418e-06	3
PMI_005104,m.23825	None,Pmi_644381_I	XP_022105941.1 inorganic pyrophosphatase-like [Acanthaster planci] (id=78.81%; len=335; e=0.00E+00) ,IPYR_DROME_Inorganic_pyrophosphatase	845	17	4.796	0.6579	0.022311	26	13	0	6	35	12	0	7	42	17	0	10	0.870156	0.979571	0.898681	0.92345	0.911695	0.991853	1.13986	1.74561e+07	1.96527e+07	1.80288e+07	1.85263e+07	1.82886e+07	1.99008e+07	0.9979	6.60925e-06	3
m.17422	Pmi_614480_G	GSTT1_MOUSE_Glutathione_S-transferase_theta-1			5.645	0.6518	0.013551	17	12	4	0	34	16	4	0	25	12	3	0	0.920013	0.989147	0.924545	0.861833	0.945086	0.938776	1.14772	1.51208e+07	1.6278e+07	1.52115e+07	1.41632e+07	1.55294e+07	1.54351e+07	0.997044	1.30928e-05	3
m.26964	39221	XP_022085987.1 cubilin-like isoform X4 [Acanthaster planci] (id=60.35%; len=396; e=2.62E-155)			4.299	0.601	0.063404	6	6	1	1	3	3	0	0	5	5	1	1	0.911614	1	0.296772	0.235685	0.28789	0.258614	4.24295	2.37391e+06	2.60358e+06	773054	616498	748027	673837	0.996475	1.86137e-05	3
m.42510,m.14194,PMI_027346	64133,Pmi_592710_P,None	XP_022081147.1 serine/threonine-protein kinase pim-1-like [Acanthaster planci] (id=93.63%; len=204; e=1.37E-136) ,PIM1_BOVIN_Serine/threonine-protein_kinase_pim-1,XP_022081147.1 serine/threonine-protein kinase pim-1-like [Acanthaster planci] (id=89.14%; len=359; e=0.00E+00)	2074	1	2.762	0.4159	0.084583	1	1	0	0	1	1	0	0	1	1	0	0	0.0251826	0.0640328	0.223344	0.405594	0.623621	1	39.71	5333.51	13529.9	46752.9	84458.9	128870	206225	0.996288	2.06471e-05	3
m.55799	83105	XP_022085986.1 cubilin-like isoform X3 [Acanthaster planci] (id=58.43%; len=267; e=1.83E-87)			3.558	0.3843	0.063404	5	5	0	5	6	5	0	4	7	6	0	5	0.979985	0.96996	0.303272	0.273839	0.280036	0.270668	3.62061	2.94867e+06	2.9082e+06	913843	829005	844724	814479	0.996066	2.31789e-05	3
m.55796	83102	XP_022085986.1 cubilin-like isoform X3 [Acanthaster planci] (id=58.05%; len=267; e=2.78E-84)			2.879	0.3843	0.063404	3	3	0	3	3	3	0	2	4	4	0	4	0.912859	0.985393	0.413534	0.457206	0.431223	0.412856	2.38677	520228	561752	237166	262073	246492	236746	0.995643	2.84339e-05	3
m.55809	83115	XP_022085984.1 cubilin-like isoform X1 [Acanthaster planci] (id=61.14%; len=368; e=1.33E-139)			3.558	0.4562	0.007388	6	5	0	3					6	5	0	3	0.993476	0.954012	0.302531	0.244142	0.258757	0.25344	4.06926	3.51242e+06	3.35583e+06	1.06924e+06	866399	917829	896181	0.99545	3.1008e-05	2
m.52486	78249	BAT21141.1 cytoplasmic polyadenylation element binding protein, CPEB [Patiria pectinifera] (id=98.16%; len=489; e=0.00E+00)			4.928	0.7181	0.051309	14	11	0	10	23	15	0	14	19	12	0	0	1	0.946955	0.712379	0.539364	0.346317	0.247202	4.04527	7.61948e+06	7.2085e+06	5.42637e+06	4.11351e+06	2.62668e+06	1.84743e+06	0.995158	3.51067e-05	3
m.28735	Pmi_661230_S	SVEP1_RAT_Sushi,_von_Willebrand_factor_type_A,_EGF_and_p..CUT			6.496	0.7276	0.000261	109	47	3	0	157	48	2	0	164	53	3	0	1	0.711473	0.619859	0.533651	0.515146	0.478612	2.08938	3.04313e+07	2.16633e+07	1.88693e+07	1.62346e+07	1.56873e+07	1.45536e+07	0.994736	4.14859e-05	3
PMI_014342		AAL05452.1 cyclin B [Patiria pectinifera] (id=99.26%; len=404; e=0.00E+00)			3.702	0.6937	0.02526	10	6	0	0	7	5	0	4	10	8	0	8	0.910157	1	0.846256	0.296249	0.310044	0.610215	3.37554	1.70266e+06	1.86935e+06	1.58212e+06	554141	580012	1.14169e+06	0.994681	4.23621e-05	3
m.45487	68214	XP_022108954.1 sushi, von Willebrand factor type A, EGF and pentraxin domain-containing protein 1-like [Acanthaster planci] (id=65.81%; len=582; e=0.00E+00)			6.496	0.713	0.002575	55	19	0	0	75	21	1	0	76	25	1	0	1	0.685387	0.593506	0.505854	0.487346	0.468637	2.13385	1.14098e+07	7.81197e+06	6.75996e+06	5.76424e+06	5.5587e+06	5.32587e+06	0.994226	4.991e-05	3
PMI_003834		XP_022108954.1 sushi, von Willebrand factor type A, EGF and pentraxin domain-containing protein 1-like [Acanthaster planci] (id=60.00%; len=835; e=0.00E+00)			5.986	0.7276	0.000261	93	34	0	0	125	38	0	0	128	40	0	0	1	0.69137	0.608788	0.537052	0.497232	0.463718	2.15648	2.21088e+07	1.52752e+07	1.34572e+07	1.18694e+07	1.09984e+07	1.02451e+07	0.993996	5.39585e-05	3
m.26961	39218	XP_022085984.1 cubilin-like isoform X1 [Acanthaster planci] (id=61.04%; len=1594; e=0.00E+00)			4.775	0.6585	0.063404	11	8	0	6	12	10	1	6	11	10	0	7	0.982111	0.994105	0.491548	0.486681	0.483068	0.506967	2.0579	1.45714e+06	1.47601e+06	732928	723841	717170	753794	0.993651	6.03325e-05	3
m.56112	83605	XP_022093247.1 suppressor of tumorigenicity 14 protein homolog isoform X1 [Acanthaster planci] (id=75.22%; len=569; e=0.00E+00)			7.101	0.7057	0.006823	41	21	0	14	52	24	0	0	58	24	0	0	0.967063	0.999826	0.646037	0.597678	0.563495	0.529821	1.8871	1.97033e+07	2.03801e+07	1.31761e+07	1.21806e+07	1.14857e+07	1.07891e+07	0.993121	7.08166e-05	3
m.13195	Pmi_585710_F	FTCD_HUMAN_Formimidoyltransferase-cyclodeaminase			4.272	0.6219	0.145452					13	8	2	0	13	7	1	0	0.873546	0.994219	0.917186	1	0.895754	0.986898	1.14476	1.42652e+06	1.61932e+06	1.49497e+06	1.62807e+06	1.46157e+06	1.60748e+06	0.993043	7.2435e-05	2
m.20916	Background_P	ST14_BOVIN_Suppressor_of_tumorigenicity_14_protein_homolog			7.101	0.7057	0.006823	39	20	1	4	50	23	1	0	54	23	1	0	0.970916	0.992213	0.658589	0.613345	0.56744	0.53846	1.84269	1.80416e+07	1.84507e+07	1.2255e+07	1.14062e+07	1.05485e+07	9.99511e+06	0.992942	7.4544e-05	3
PMI_011000		XP_022108954.1 sushi, von Willebrand factor type A, EGF and pentraxin domain-containing protein 1-like [Acanthaster planci] (id=70.67%; len=208; e=1.01E-94)			4.329	0.5539	0.002575	21	6	0	0	34	10	1	0	28	10	1	0	1	0.714043	0.616837	0.500614	0.531119	0.48678	2.05432	8.40436e+06	6.00688e+06	5.1847e+06	4.20181e+06	4.46556e+06	4.09295e+06	0.991745	0.000101939	3
m.14235,m.45283,PMI_003665	Pmi_593320_F,67871,None	FAHD1_MOUSE_Acylpyruvase_FAHD1,_mitochondrial,XP_022091480.1 acylpyruvase FAHD1, mitochondrial-like [Acanthaster planci] (id=86.11%; len=216; e=2.80E-136) ,XP_022091480.1 acylpyruvase FAHD1, mitochondrial-like [Acanthaster planci] (id=83.93%; len=168; e=2.54E-99)	1718	5	3.668	0.4918	0.30083	5	5	0	3	6	5	0	3	4	3	0	0	0.851077	0.915336	0.793467	0.861745	0.959688	0.994884	1.25384	358976	385545	335109	363348	403467	418850	0.991454	0.000109233	3
m.23658	Pmi_643650_n	no_annot			5.655	0.6955	0.001426	365	63	0	29	526	74	0	32	530	74	0	31	0.991781	0.866287	0.992931	0.994882	0.869751	0.863743	1.15183	8.59796e+08	7.50318e+08	8.60937e+08	8.6263e+08	7.53312e+08	7.48094e+08	0.991303	0.000113129	3
PMI_002678		XP_022102885.1 E3 ubiquitin-protein ligase HECTD3-like [Acanthaster planci] (id=90.75%; len=865; e=0.00E+00)			3.861	0.5209	0.142736	7	7	1	6	6	5	0	0	4	3	0	0	0.802831	0.97236	0.894543	0.94796	0.842418	0.967051	1.21116	309559	373580	343814	364483	324083	372467	0.990897	0.000123922	3
m.37499	56701	XP_022092583.1 enoyl-CoA delta isomerase 1, mitochondrial-like [Acanthaster planci] (id=72.76%; len=301; e=2.04E-164)			5.878	0.6456	0.028279	24	12	2	5	27	10	1	5	31	12	1	6	0.967537	0.595772	0.85574	0.963269	0.591938	0.639246	1.63452	2.42066e+07	1.49145e+07	2.14085e+07	2.41024e+07	1.48118e+07	1.59987e+07	0.989298	0.000171177	3
PMI_024487,m.18725	None,Pmi_621180_G	XP_022084225.1 glutamine synthetase-like [Acanthaster planci] (id=87.74%; len=367; e=0.00E+00) ,GLNA_SQUAC_Glutamine_synthetase,_mitochondrial	1151	8	4.832	0.6119	0.015046	10	5	0	2	11	8	0	6	10	6	0	5	0.337769	0.352294	0.495956	0.555141	0.800791	1	2.9606	1.30553e+06	1.36034e+06	1.92929e+06	2.15449e+06	3.09902e+06	3.87218e+06	0.989194	0.000174508	3
m.25753	Pmi_651692_n	no_annot			3.667	0.5075	0.041239	5	5	1	0	9	7	2	5	7	6	2	0	0.950599	0.907971	0.937865	0.943036	0.95106	0.781058	1.21766	1.10447e+06	1.0559e+06	1.08929e+06	1.09626e+06	1.10401e+06	911306	0.988935	0.000182959	3
m.47859	71613	BAJ41230.1 egg coat matrix protein [Patiria pectinifera] (id=97.26%; len=729; e=0.00E+00)			5.693	0.7481	0.000909	122	28	1	20	151	30	2	20	152	31	1	23	1	0.808059	0.725173	0.660835	0.623829	0.552638	1.8095	8.22113e+07	6.6443e+07	5.96254e+07	5.43308e+07	5.1295e+07	4.54344e+07	0.988275	0.000205398	3
m.38624	58282	XP_002596671.1 hypothetical protein BRAFLDRAFT_122038 [Branchiostoma floridae] (id=58.83%; len=600; e=0.00E+00)			5.583	0.5941	0.001827	20	15	0	14	22	16	0	15	21	17	0	16	0.866101	0.868785	0.940411	1	0.913023	0.90408	1.1546	2.62561e+06	2.62907e+06	2.84976e+06	3.03248e+06	2.77111e+06	2.74633e+06	0.988273	0.000205481	3
m.28400	41817	XP_022107339.1 protein PAT1 homolog 1-like [Acanthaster planci] (id=87.66%; len=478; e=0.00E+00)			5.062	0.6137	0.003832	14	11	0	2	19	15	1	14	20	15	1	13	0.950673	0.965905	0.790181	0.696588	0.636915	0.571153	1.69115	2.30562e+06	2.32434e+06	1.91303e+06	1.68722e+06	1.5286e+06	1.36774e+06	0.987362	0.000238588	3
m.11611	Pmi_572100_T	TDCB_STAAN_L-threonine_dehydratase_catabolic_TdcB			4.681	0.5138	0.067644	4	4	2	0	4	4	1	0	7	6	1	0	0.820673	0.886286	0.82105	0.93102	0.942597	0.944435	1.15081	482135	520680	482312	546913	553854	554854	0.986821	0.000259392	3
m.18849,m.33082	Pmi_621900_n,49484	no_annot,XP_022084827.1 uncharacterized protein LOC110976117 [Acanthaster planci] (id=72.07%; len=734; e=0.00E+00)	1642	18	6.211	0.7053	0.005278	78	16	0	12	132	19	0	15	138	20	0	0	1	0.820387	0.73557	0.670003	0.612982	0.587092	1.70331	7.89242e+07	6.4686e+07	5.80435e+07	5.28566e+07	4.83549e+07	4.62769e+07	0.986787	0.000260703	3
PMI_005839		BAT21141.1 cytoplasmic polyadenylation element binding protein, CPEB [Patiria pectinifera] (id=97.18%; len=461; e=0.00E+00)			4.928	0.7181	0.067462	5	3	0	1	10	5	0	3	9	6	0	5	0.948009	1	0.74253	0.598754	0.371011	0.288879	3.46165	1.20751e+06	1.27297e+06	945821	762648	472493	367889	0.986669	0.00026538	3
PMI_006337		XP_022093247.1 suppressor of tumorigenicity 14 protein homolog isoform X1 [Acanthaster planci] (id=66.32%; len=193; e=6.94E-79)			4.816	0.6401	0.038682					16	7	0	0	14	7	0	0	1	0.960098	0.644608	0.587921	0.560104	0.492134	2.03197	5.19019e+06	4.97026e+06	3.35008e+06	3.04519e+06	2.8936e+06	2.5484e+06	0.985047	0.000333696	2
PMI_004003		XP_022093247.1 suppressor of tumorigenicity 14 protein homolog isoform X1 [Acanthaster planci] (id=70.02%; len=567; e=0.00E+00)			6.318	0.6699	0.00852					35	17	0	0	40	18	2	0	0.955858	0.990695	0.648361	0.563177	0.5685	0.51202	1.93487	1.17078e+07	1.21184e+07	7.93783e+06	6.89012e+06	6.95931e+06	6.26415e+06	0.984935	0.000338708	2
m.13586	Pmi_588680_P	PXDN_HUMAN_Peroxidasin_homolog			4.732	0.5878	0.015127	9	7	4	2	14	10	5	3	13	10	5	2	0.944998	1	0.677101	0.676631	0.712668	0.670495	1.49144	1.96066e+06	2.07511e+06	1.40368e+06	1.4063e+06	1.48021e+06	1.39274e+06	0.984642	0.000351972	3
m.12596,PMI_022789	Pmi_580560_A,None	ADRB1_SHEEP_Beta-1_adrenergic_receptor,XP_022087349.1 delta-type opioid receptor-like isoform X2 [Acanthaster planci] (id=87.50%; len=208; e=7.38E-130)	1476	3	3.229	0.5891	0.005213	1	1	0	0	3	2	0	1	2	1	0	0	0.841359	0.820233	0.779007	0.657677	0.797677	0.814257	1.27929	58655.3	57381.6	54646.1	47286.2	55609.5	56988.9	0.983438	0.000409188	3
m.45494	68220	XP_022108954.1 sushi, von Willebrand factor type A, EGF and pentraxin domain-containing protein 1-like [Acanthaster planci] (id=69.63%; len=843; e=0.00E+00)			5.986	0.7276	0.000261	57	26	0	0	82	27	0	0	84	27	0	0	1	0.717033	0.628647	0.562778	0.520461	0.478218	2.0911	1.56778e+07	1.12485e+07	9.857e+06	8.83056e+06	8.1651e+06	7.50156e+06	0.982162	0.000474468	3
m.17827	Pmi_616470_M	MYEF2_MOUSE_Myelin_expression_factor_2			3.816	0.5139	0.348281	1	1	0	0	2	2	0	1	4	4	0	4	0.862585	0.961312	0.872358	0.936023	0.950486	0.91574	1.11445	187621	208288	189633	202893	206032	198632	0.982022	0.000481904	3
PMI_009884		XP_022097990.1 trithorax group protein osa-like isoform X2 [Acanthaster planci] (id=59.77%; len=1469; e=0.00E+00)			3.951	0.57	0.055874	18	13	1	1	37	25	2	5	38	25	3	5	1	0.763129	0.602052	0.609168	0.605982	0.642293	1.66099	5.84864e+06	4.45778e+06	3.5083e+06	3.55902e+06	3.5379e+06	3.74673e+06	0.98172	0.00049821	3
m.47075,m.47089	70565,70572	XP_022097990.1 trithorax group protein osa-like isoform X2 [Acanthaster planci] (id=78.64%; len=1044; e=0.00E+00) ,XP_022097998.1 trithorax group protein osa-like isoform X3 [Acanthaster planci] (id=78.64%; len=1044; e=0.00E+00)	757	25	4.566	0.5988	0.03044	23	18	0	0	44	24	0	0	43	25	0	0	1	0.776934	0.602985	0.62299	0.632088	0.652303	1.65842	5.57922e+06	4.31876e+06	3.3528e+06	3.47741e+06	3.5186e+06	3.64235e+06	0.980747	0.000552447	3
m.55797	83103	XP_022085984.1 cubilin-like isoform X1 [Acanthaster planci] (id=59.48%; len=116; e=8.05E-31)			2.566	0.3743	0.341835	1	1	1	0	1	1	1	0					0.832516	1	0.369839	0.288631	0.338713	0.365806	3.46463	196589	238394	83493.4	66859.8	76498.5	84123.7	0.979905	0.000601678	2
m.16551	Pmi_608771_N	NALDL_RAT_N-acetylated-alpha-linked_acidic_dipeptidase-lik..CUT			5.118	0.6307	0.009402	16	12	0	11	21	17	0	15	17	13	0	10	0.970259	0.921686	0.968788	0.953228	0.94824	0.922208	1.0527	2.02584e+06	1.92475e+06	2.02281e+06	1.99045e+06	1.98008e+06	1.92602e+06	0.979512	0.000625312	3
PMI_025998		XP_022102124.1 TBC1 domain family member 10A-like [Acanthaster planci] (id=80.51%; len=467; e=0.00E+00)			2.695	0.4805	1.26444	1	1	1	0					1	1	0	0	0.758188	0.852703	0.891472	0.859548	0.911534	1	1.31893	24056.4	27001	28132.3	27216.7	28861.6	31598.7	0.979163	0.000646732	2
PMI_000263		AFR91943.1 DNA cytosine-5-methyltransferase 1 [Patiria pectinifera] (id=95.74%; len=1619; e=0.00E+00)			3.428	0.4501	0.419099	3	3	1	2					4	3	0	3	0.259592	0.297684	0.515505	0.550477	0.806037	1	3.8522	44178.5	50424.5	93504.8	100222	144605	183164	0.979017	0.000655812	2
m.41240,m.19180,PMI_007470	62414,Pmi_623561_F,None	XP_022094908.1 calcium channel flower homolog [Acanthaster planci] (id=81.93%; len=166; e=7.26E-99) ,FLOWR_HUMAN_Calcium_channel_flower_homolog,XP_022094908.1 calcium channel flower homolog [Acanthaster planci] (id=36.26%; len=171; e=1.29E-12)	2028	1	5.472	0.6491	0.005835	2	1	0	0	1	1	0	0					0.88798	0.867201	0.70062	0.998331	0.992955	0.860806	1.42492	217012	211946	171140	244034	242710	210382	0.978798	0.000669527	2
PMI_019376,PMI_020668,m.23390,m.44908	None,None,Pmi_642610_L,67274	XP_022081274.1 emerin homolog 1-like isoform X2 [Acanthaster planci] (id=69.37%; len=222; e=3.69E-87) ,XP_022081274.1 emerin homolog 1-like isoform X2 [Acanthaster planci] (id=69.20%; len=224; e=2.97E-88) ,LAP2A_MOUSE_Lamina-associated_polypeptide_2,_isoforms_alpha/zeta,XP_022081273.1 lamina-associated polypeptide 2, isoforms beta/delta/epsilon/gamma-like isoform X1 [Acanthaster planci] (id=73.15…	1199	3	2.393	0.2746	0.089864	1	1	0	0	2	2	0	0	1	1	0	0	0.869052	0.863238	0.826916	0.822583	0.752381	0.979585	1.30198	146721	145367	138966	138202	124880	167683	0.978769	0.000671323	3
m.26404	Pmi_653900_F	FA5_MOUSE_Coagulation_factor_V			6.367	0.7314	0.000439	87	20	3	14	137	28	4	18	137	27	5	13	1	0.796015	0.7236	0.662914	0.611494	0.585726	1.70728	6.34877e+07	5.05233e+07	4.59498e+07	4.20681e+07	3.88287e+07	3.72102e+07	0.977398	0.000760535	3
PMI_004752		XP_022085611.1 uncharacterized protein LOC110976553 isoform X1 [Acanthaster planci] (id=71.50%; len=214; e=3.70E-104)			4.103	0.4641	0.652911	3	3	2	1	1	1	0	0	5	4	3	0	0.904629	0.744595	0.92436	0.9894	0.740162	0.814357	1.33673	241003	195774	244803	267745	189833	212538	0.976699	0.00080807	3
m.20218	Pmi_628691_H	HEPH_HUMAN_Hephaestin			3.346	0.5335	0.014905	4	4	1	3					2	2	0	1	0.591566	1	0.635256	0.601722	0.79322	0.796335	1.69043	1.63331e+06	2.77309e+06	1.75476e+06	1.66787e+06	2.19555e+06	2.2065e+06	0.976125	0.000848185	2
PMI_009947		XP_022108362.1 steroid 17-alpha-hydroxylase/17,20 lyase-like [Acanthaster planci] (id=83.01%; len=518; e=0.00E+00)			5.709	0.6423	0.004356	48	31	1	25	83	35	1	30	78	35	1	30	0.978039	0.939538	0.914309	0.944377	0.913951	0.931444	1.07012	3.18647e+07	3.04252e+07	2.96926e+07	3.07208e+07	2.96828e+07	3.02399e+07	0.976008	0.00085653	3
m.31416,PMI_008722	Pmi_669291_H,None	H2A_PARLI_Histone_H2A,XP_022108863.1 late histone H2A.2.2-like [Acanthaster planci] (id=87.12%; len=132; e=8.33E-68)	143	3	2.84	0.4205	0.017898	3	2	0	1	4	4	0	3	5	4	0	3	0.507611	0.526785	0.58744	0.709197	0.727944	1	1.97001	1.04914e+06	1.08462e+06	1.21131e+06	1.46034e+06	1.49805e+06	2.0652e+06	0.975721	0.000877038	3
m.30988,m.31948	Pmi_668222_R,47736	RDH13_HUMAN_Retinol_dehydrogenase_13,XP_022084913.1 retinol dehydrogenase 12-like [Acanthaster planci] (id=81.74%; len=334; e=0.00E+00)	1759	11	3.633	0.4	0.083406	10	7	0	5	13	8	0	7	16	9	0	7	0.879044	0.974075	0.953388	0.931091	0.9532	0.984673	1.12016	1.64023e+06	1.82026e+06	1.78144e+06	1.73866e+06	1.77998e+06	1.84073e+06	0.975697	0.000878756	3
m.53431	79535	XP_022101380.1 transcription initiation factor IIA subunit 1-like isoform X2 [Acanthaster planci] (id=82.84%; len=338; e=1.42E-154)			4.009	0.5847	0.117085	4	3	0	3	5	3	0	0	6	4	0	4	0.889192	0.938582	0.837953	0.890515	0.938154	0.982995	1.17309	475076	500871	447463	475795	501633	525015	0.975507	0.00089252	3
PMI_000799,m.6084	None,Pmi_498180_n	XP_022084434.1 uncharacterized protein LOC110975883 [Acanthaster planci] (id=58.69%; len=443; e=3.54E-160) ,no_annot	1652	1	2.523	0.2691	0.15602	1	1	0	0	1	1	0	0					1	0.90679	0.733354	0.156334	0.127263	0.432137	7.85772	68757.6	62189.9	49806.2	11019.3	8892.9	30173.8	0.974108	0.000996891	2
PMI_003800		XP_022098760.1 leucine-rich repeat and guanylate kinase domain-containing protein-like isoform X2 [Acanthaster planci] (id=83.59%; len=640; e=0.00E+00)			4.054	0.518	0.12042	4	4	0	4	2	2	0	1	2	2	0	1	0.738658	0.806514	0.725476	0.728967	0.937954	0.878388	1.29288	42952.6	46680.7	41479.7	42996	53978.2	51332.1	0.973806	0.00102023	3
PMI_006425		XP_022096202.1 ATP synthase subunit alpha, mitochondrial-like [Acanthaster planci] (id=96.42%; len=335; e=0.00E+00)			5.732	0.6614	0.003656	65	22	0	9	110	26	0	11	95	27	0	11	0.964137	0.951011	0.919774	0.934213	1	0.923629	1.08722	5.26844e+07	5.19667e+07	5.02774e+07	5.10761e+07	5.46949e+07	5.03652e+07	0.973184	0.00106902	3
PMI_001490		ELW62839.1 Cytoplasmic polyadenylation element-binding protein 1 [Tupaia chinensis] (id=66.26%; len=326; e=1.08E-150)			4.29	0.5673	0.143713	7	5	1	0	12	8	1	0	10	7	1	0	1	0.899971	0.729292	0.515642	0.310972	0.215704	4.63599	2.36382e+06	2.10643e+06	1.7269e+06	1.24021e+06	725730	501980	0.97248	0.00112562	3
m.16681	21993	XP_022110937.1 stress-induced-phosphoprotein 1-like [Acanthaster planci] (id=83.90%; len=205; e=5.67E-123)			4.235	0.5761	0.028414	14	11	0	0	28	16	0	0	24	15	0	0	0.927568	0.964143	0.92677	0.897126	0.971794	0.98852	1.10187	6.20138e+06	6.44445e+06	6.19394e+06	5.99699e+06	6.49103e+06	6.60515e+06	0.972425	0.0011301	3
PMI_009013		XP_022108714.1 programmed cell death protein 6-like isoform X2 [Acanthaster planci] (id=91.91%; len=173; e=5.20E-116)			5.218	0.6451	0.032549	6	5	1	4	11	5	1	4	10	5	1	4	0.867146	0.896053	0.915644	0.83482	1	0.919465	1.19786	355312	366931	374534	342022	409447	376376	0.968778	0.00144703	3
m.30436,m.40627,PMI_005652	Pmi_666722_N,61330,None	NEK7_MOUSE_Serine/threonine-protein_kinase_Nek7,XP_022106037.1 serine/threonine-protein kinase Nek7-like isoform X2 [Acanthaster planci] (id=94.83%; len=329; e=0.00E+00) ,XP_022106037.1 serine/threonine-protein kinase Nek7-like isoform X2 [Acanthaster planci] (id=96.83%; len=252; e=0.00E+00)	2344	4	3.957	0.4742	0.196146	6	4	0	0	3	2	0	0	3	2	0	0	0.957599	0.911985	0.911155	0.905018	0.967623	0.965648	1.06918	485662	462231	462052	458826	490486	489394	0.968028	0.00151694	3
PMI_005559		XP_022109998.1 uncharacterized protein LOC110989726 [Acanthaster planci] (id=81.06%; len=433; e=0.00E+00)			5.289	0.5548	0.011112	75	13	1	1	126	17	2	2	136	18	3	2	0.996069	0.736983	0.946784	0.955243	0.768613	0.766827	1.35155	2.52298e+08	1.85936e+08	2.40234e+08	2.42835e+08	1.93692e+08	1.93943e+08	0.96715	0.00160097	3
PMI_016341		XP_022083966.1 lysosomal protective protein-like [Acanthaster planci] (id=80.04%; len=481; e=0.00E+00)			6.084	0.6621	0.072625	2	2	1	1	7	5	1	4	6	4	0	3	0.943256	0.852262	0.833815	0.832584	0.963362	0.865917	1.15708	1.15416e+06	1.02713e+06	1.05482e+06	1.03542e+06	1.19922e+06	1.07509e+06	0.967148	0.00160112	3
PMI_012880		XP_022100704.1 quinone oxidoreductase-like protein 2 homolog [Acanthaster planci] (id=71.30%; len=230; e=4.75E-108)			4.188	0.5671	0.087039	7	6	1	5	8	5	1	4	8	6	1	5	0.91264	0.896507	0.966454	0.933588	0.948321	0.944817	1.07802	1.34489e+06	1.31725e+06	1.4218e+06	1.37159e+06	1.38837e+06	1.38284e+06	0.966457	0.00166882	3
m.31129,m.31287	46510,Pmi_668970_A	sp|Q9NLA3.1|ANO39_PATPE RecName: Full=Nucleoplasmin-like protein ANO39; AltName: Full=39 kDa oocyte-expressed nucleolar protein; AltName: Full=Nucleic acid-associated protein 36; AltName: Full=Nucleic acid-binding nuclear protein; Short=NAAP; Short=NAAP1; Short=NAAP2 (id=96.82%; len=346; e=0.00E+00) ,ANO39_ASTPE_Nucleoplasmin-like_protein_ANO39	1599	18	5.242	0.572	0.000361	41	15	0	7	54	16	0	8	53	19	0	9	0.98584	0.806869	0.702733	0.754987	0.789881	0.986974	1.40448	3.65468e+07	2.99042e+07	2.60726e+07	2.79882e+07	2.92484e+07	3.65601e+07	0.966066	0.00170769	3
PMI_005314		XP_022081140.1 uncharacterized protein LOC110974087 isoform X2 [Acanthaster planci] (id=78.20%; len=312; e=7.92E-175)			5.043	0.6461	0.00718	60	16	1	2	79	23	5	2	91	23	3	2	0.892686	1	0.909458	0.862931	0.975623	0.944094	1.15884	2.36408e+07	2.64861e+07	2.40767e+07	2.28488e+07	2.58401e+07	2.50047e+07	0.965979	0.00171642	3
m.52627	78448	XP_022093111.1 uncharacterized protein LOC110980590 [Acanthaster planci] (id=77.05%; len=244; e=3.06E-135)			5.289	0.6905	0.002061	186	21	0	17	251	23	0	19	270	23	0	0	0.962209	0.816058	0.988765	0.994104	0.827627	0.815102	1.21961	4.21026e+08	3.55559e+08	4.33289e+08	4.35445e+08	3.61072e+08	3.55516e+08	0.965338	0.00178138	3
PMI_016250		XP_022080973.1 GTP-binding protein SAR1b-like [Acanthaster planci] (id=64.91%; len=57; e=1.52E-12)			3.378	0.5497	0.044001	3	1	1	0	2	1	1	0	2	1	1	0	0.96328	0.753951	0.941669	0.97724	0.747898	0.787676	1.30665	1.07346e+06	844388	1.04878e+06	1.09172e+06	832683	875641	0.965277	0.00178762	3
m.20358	Pmi_629420_A	ABCF1_PIG_ATP-binding_cassette_sub-family_F_member_1			4.957	0.5882	0.024733	12	4	0	3	16	9	0	7	17	11	0	8	0.88985	0.993682	0.934923	0.931984	0.957937	0.960542	1.11669	3.13838e+06	3.50678e+06	3.29832e+06	3.28741e+06	3.38001e+06	3.38911e+06	0.964771	0.00183971	3
m.37600,m.37599,m.25129	56900,56899,Pmi_649370_A	XP_022080994.1 acyl-CoA dehydrogenase family member 9, mitochondrial-like [Acanthaster planci] (id=88.77%; len=641; e=0.00E+00) ,XP_022080994.1 acyl-CoA dehydrogenase family member 9, mitochondrial-like [Acanthaster planci] (id=88.78%; len=642; e=0.00E+00) ,ACAD9_HUMAN_Acyl-CoA_dehydrogenase_family_member_9,_mito..CUT	2272	27	6.024	0.6521	0.035966	31	20	0	18	38	27	0	23	40	27	0	23	0.902026	0.972932	0.940039	0.96941	0.917968	0.976028	1.08204	6.79278e+06	7.32836e+06	7.08311e+06	7.30658e+06	6.91331e+06	7.35295e+06	0.964355	0.00188325	3
PMI_018659		XP_022109998.1 uncharacterized protein LOC110989726 [Acanthaster planci] (id=84.48%; len=554; e=0.00E+00)			5.306	0.6415	0.006384	105	33	2	27	146	34	3	26	160	37	1	29	0.994741	0.743205	0.944244	0.955611	0.773268	0.773767	1.33845	2.52055e+08	1.87623e+08	2.39701e+08	2.42952e+08	1.95011e+08	1.95811e+08	0.963611	0.00196217	3
m.43976,m.43986,m.43990,m.27118	66067,66072,66075,Pmi_656320_N	XP_022108755.1 tRNA (cytosine(34)-C(5))-methyltransferase-like [Acanthaster planci] (id=74.82%; len=818; e=0.00E+00) ,XP_022108755.1 tRNA (cytosine(34)-C(5))-methyltransferase-like [Acanthaster planci] (id=75.06%; len=818; e=0.00E+00) ,XP_022108755.1 tRNA (cytosine(34)-C(5))-methyltransferase-like [Acanthaster planci] (id=75.06%; len=818; e=0.00E+00) ,NSUN2_MOUSE_tRNA_(cytosine(34)-C(5))-methyltr…	1165	20	4.848	0.6534	0.001009	14	12	0	11	12	12	0	8	15	12	0	10	0.883536	0.928378	0.916261	0.967042	0.87057	0.947815	1.11081	1.20212e+06	1.264e+06	1.24792e+06	1.31831e+06	1.18425e+06	1.29102e+06	0.962923	0.00203656	3
PMI_021948		XP_022085037.1 atrial natriuretic peptide receptor 1-like isoform X1 [Acanthaster planci] (id=53.09%; len=356; e=6.76E-124)			2.355	0.4	0.837465					2	2	0	2	1	1	0	0	0.996169	0.850379	0.798671	0.741092	0.960293	0.992089	1.34419	94171.7	79365.8	73950.6	68298.4	90723.2	93640.8	0.961668	0.00217586	2
PMI_000745		XP_022102984.1 sorting nexin-2-like [Acanthaster planci] (id=71.48%; len=561; e=0.00E+00)			5.746	0.5977	0.006646	33	19	2	0	64	30	3	1	73	35	3	1	0.914423	0.972757	0.946473	0.907965	0.996546	0.987339	1.09756	1.21384e+07	1.29112e+07	1.2566e+07	1.20528e+07	1.32332e+07	1.31065e+07	0.961611	0.00218233	3
m.32033	Pmi_670840_C	CLH_MOUSE_Clathrin_heavy_chain_1			6.84	0.6833	0.000871	107	56	13	41	156	71	20	47	165	77	17	56	0.957218	0.953063	0.963852	0.923841	0.992342	0.944815	1.07415	2.87623e+07	2.86364e+07	2.89672e+07	2.77609e+07	2.98218e+07	2.83916e+07	0.960737	0.00228205	3
m.17589	Pmi_615340_P	PURA1_BOVIN_Adenylosuccinate_synthetase_isozyme_1			5.319	0.6467	0.010576	19	14	1	13	26	16	1	14	31	19	1	17	0.931013	0.978983	0.977439	0.977762	0.990502	0.976025	1.0639	4.67279e+06	4.91303e+06	4.90556e+06	4.90871e+06	4.96876e+06	4.89876e+06	0.960656	0.0022915	3
PMI_002447		XP_022104560.1 protein transport protein Sec31A-like isoform X1 [Acanthaster planci] (id=81.60%; len=1000; e=0.00E+00)			5.096	0.627	0.001251	18	13	1	2	19	15	1	1	17	14	0	1	0.860321	0.899773	0.891354	0.903546	0.951368	0.990914	1.15179	1.42018e+06	1.48475e+06	1.47074e+06	1.49135e+06	1.57187e+06	1.63579e+06	0.957635	0.00265418	3
m.21101	Pmi_632971_B	BBS7_HUMAN_Bardet-Biedl_syndrome_7_protein			3.127	0.5398	0.097209	1	1	0	0	4	4	2	2	4	4	3	1	0.823796	0.943288	0.878209	0.885432	0.90779	0.995338	1.20823	281073	321900	299657	301958	309084	339769	0.957416	0.00268145	3
PMI_010708		XP_022081953.1 U4/U6 small nuclear ribonucleoprotein Prp3-like [Acanthaster planci] (id=77.89%; len=674; e=0.00E+00)			4.026	0.5792	0.160253	4	4	0	0	5	5	0	5	3	3	0	0	0.921288	0.874311	0.854482	0.985071	0.914029	0.932499	1.15283	168168	158228	155525	178524	164362	167952	0.956721	0.00276908	3
m.53374	79462	XP_022084647.1 multiple epidermal growth factor-like domains protein 6 [Acanthaster planci] (id=80.09%; len=1592; e=0.00E+00)			7.476	0.7572	0.000659	306	79	0	0	453	82	0	0	430	82	0	0	0.989151	0.977086	0.950921	0.953756	0.913407	0.960133	1.08292	1.08937e+08	1.07473e+08	1.04574e+08	1.04729e+08	1.00438e+08	1.05593e+08	0.956657	0.00277719	3
m.23421	Pmi_642861_V	VILI_HUMAN_Villin-1			4.227	0.5453	0.005719	12	9	0	9	19	14	0	12	17	12	0	11	0.922285	0.944547	0.92853	0.901392	0.95266	0.978204	1.08521	2.88528e+06	2.95632e+06	2.90382e+06	2.8201e+06	2.9807e+06	3.06088e+06	0.956323	0.0028198	3
PMI_027260		XP_002597711.1 hypothetical protein BRAFLDRAFT_77385, partial [Branchiostoma floridae] (id=35.50%; len=169; e=4.83E-25)			1.951	0.1773	1.69605					1	1	1	0	1	1	1	0	0.713117	0.833687	0.674449	0.688777	0.759155	1	1.48269	153933	179962	145928	148585	163672	215777	0.955994	0.00286222	2
m.53908	80344	XP_022111824.1 prolow-density lipoprotein receptor-related protein 1-like [Acanthaster planci] (id=69.31%; len=1916; e=0.00E+00)			4.504	0.6527	0.045212	11	8	0	2	16	13	0	3	19	17	0	4	0.841516	0.937786	0.894825	0.908266	0.903968	0.988988	1.17524	942738	1.04706e+06	1.00049e+06	1.01464e+06	1.01217e+06	1.10506e+06	0.954982	0.00299435	3
PMI_001260		XP_022081724.1 RING finger protein 17-like isoform X2 [Acanthaster planci] (id=72.52%; len=1816; e=0.00E+00)			3.189	0.4604	0.011074					10	9	1	8	6	6	1	5	0.885751	0.977502	0.889805	0.958752	0.961391	1	1.12899	830781	917271	834779	899444	901721	937905	0.954722	0.00302869	2
PMI_004222		XP_022110787.1 40S ribosomal protein S9 [Acanthaster planci] (id=95.81%; len=191; e=1.80E-127)			3.747	0.6332	0.005177	32	12	12	0	43	16	16	0	46	16	16	0	0.969329	0.712447	0.963478	0.967237	0.692713	0.702645	1.39932	1.98242e+07	1.46163e+07	1.97308e+07	1.98561e+07	1.41828e+07	1.44036e+07	0.954665	0.00303628	3
PMI_020687,m.11988	None,Pmi_575411_R	XP_022099604.1 40S ribosomal protein S3 [Acanthaster planci] (id=94.78%; len=268; e=6.56E-179) ,RS3_HUMAN_40S_ribosomal_protein_S3_>gi	2471	24	4.595	0.6871	0.004347	72	24	0	19	104	26	0	18	103	26	0	21	0.96029	0.922187	0.996504	0.958146	0.904933	0.919057	1.10119	6.06313e+07	5.82316e+07	6.299e+07	6.05245e+07	5.71708e+07	5.8054e+07	0.954512	0.00305669	3
m.19341	Pmi_624400_M	MA2B1_MACFA_Lysosomal_alpha-mannosidase			5.307	0.6049	0.00949	21	15	2	9	31	20	2	11	34	25	3	15	0.909425	0.939515	0.976556	0.96399	0.946385	0.965241	1.07382	6.68877e+06	6.91048e+06	7.20116e+06	7.07113e+06	6.95278e+06	7.08581e+06	0.954038	0.0031202	3
PMI_015333		XP_022099893.1 dolichyl-diphosphooligosaccharide--protein glycosyltransferase subunit 1-like [Acanthaster planci] (id=87.93%; len=605; e=0.00E+00)			5.891	0.6542	0.018171	46	23	0	21	63	28	0	21	65	31	0	22	0.963161	0.896323	0.958405	0.990808	0.943656	0.903082	1.10541	1.92013e+07	1.78937e+07	1.91063e+07	1.97524e+07	1.88105e+07	1.80247e+07	0.95398	0.00312805	3
PMI_022902,m.47983	None,71769	XP_002737496.1 PREDICTED: calcium-regulated heat stable protein 1-like isoform X1 [Saccoglossus kowalevskii] (id=49.63%; len=135; e=3.67E-35) ,XP_002737496.1 PREDICTED: calcium-regulated heat stable protein 1-like isoform X1 [Saccoglossus kowalevskii] (id=49.63%; len=135; e=4.12E-35)	1557	3	5.094	0.5544	0.084153	2	1	0	0	3	2	0	0	4	3	0	2	0.80058	0.801694	0.67639	0.723465	0.799473	1	1.47844	783290	781085	652451	706915	782602	999014	0.953765	0.00315711	3
PMI_024091		XP_022100018.1 titin-like isoform X2 [Acanthaster planci] (id=48.56%; len=1143; e=0.00E+00)			3.169	0.3941	0.137421	1	1	1	0	1	1	1	0					0.92626	1	0.680266	0.596218	0.825112	0.852875	1.67724	65078.2	70558.9	47771	42138.8	57875.3	59802.7	0.952809	0.00328789	2
m.19665	Pmi_626003_E	EDF1_XENLA_Endothelial_differentiation-related_factor_1_homolog			3.499	0.5436	0.007839	18	9	4	5	23	11	5	6	21	14	7	5	0.89426	0.954965	0.969036	0.924785	0.990181	0.985476	1.10726	3.09379e+06	3.30429e+06	3.35074e+06	3.19726e+06	3.42382e+06	3.40951e+06	0.952786	0.00329115	3
m.11500,m.11501,PMI_021128	16798,16799,None	XP_022107110.1 eukaryotic translation initiation factor 4E-like isoform X2 [Acanthaster planci] (id=87.00%; len=223; e=3.55E-140) ,XP_022107110.1 eukaryotic translation initiation factor 4E-like isoform X2 [Acanthaster planci] (id=86.57%; len=216; e=1.05E-133) ,XP_022107110.1 eukaryotic translation initiation factor 4E-like isoform X2 [Acanthaster planci] (id=87.00%; len=223; e=4.68E-140)	1774	8	5.294	0.4677	0.004413	7	4	0	0	18	8	0	0	13	5	0	0	0.917246	0.99137	0.865281	0.893683	0.902404	0.991622	1.14601	7.3035e+06	7.88547e+06	6.88378e+06	7.1088e+06	7.17848e+06	7.88572e+06	0.952754	0.0032955	3
PMI_014948,m.20273,m.20274,m.16984,PMI_023161	None,27320,27323,Pmi_611520_R,None	XP_022099179.1 ribosome-recycling factor, mitochondrial-like isoform X1 [Acanthaster planci] (id=81.13%; len=265; e=2.84E-150) ,XP_022099179.1 ribosome-recycling factor, mitochondrial-like isoform X1 [Acanthaster planci] (id=82.64%; len=265; e=1.39E-155) ,XP_022099179.1 ribosome-recycling factor, mitochondrial-like isoform X1 [Acanthaster planci] (id=84.15%; len=265; e=6.82E-160) ,RRFM_BOVIN_Ribo…	1472	6	4.612	0.535	0.114765	4	3	0	0	4	4	0	0	7	6	0	0	0.854737	0.995705	0.910364	0.905592	0.97233	0.97067	1.16493	614667	716952	655031	651766	699747	698533	0.952384	0.00334689	3
m.19367	Pmi_624571_S	SNX12_HUMAN_Sorting_nexin-12			5.897	0.6779	0.041647	38	15	0	14	38	16	0	15	34	14	0	13	0.926761	0.961623	0.937318	0.939276	0.984654	0.991473	1.06983	7.96e+06	8.25688e+06	8.04842e+06	8.06547e+06	8.45336e+06	8.51276e+06	0.951632	0.00345256	3
PMI_020941,m.13434,m.45999	None,Pmi_587460_S,68935	XP_022086972.1 SURP and G-patch domain-containing protein 1-like [Acanthaster planci] (id=69.76%; len=625; e=0.00E+00) ,SUGP1_RAT_SURP_and_G-patch_domain-containing_protein_1,XP_022086972.1 SURP and G-patch domain-containing protein 1-like [Acanthaster planci] (id=90.00%; len=220; e=9.27E-141)	1345	1	2.551	0.1901	0.52314					1	1	0	0	1	1	0	0	0.737395	0.821058	1	0.90208	0.925328	0.880757	1.35612	46110	51305.3	62516.5	56369.3	57863.9	55073.1	0.951435	0.00348059	2
PMI_020691		XP_022081406.1 cytochrome P450 2D9-like [Acanthaster planci] (id=84.11%; len=516; e=0.00E+00)			5.494	0.6083	0.06686	7	6	2	4	7	6	2	4	7	5	2	3	0.899095	0.92913	0.899927	0.97148	0.952659	0.971513	1.08055	893324	919458	895365	966717	944579	962661	0.950078	0.00367608	3
m.26980	Pmi_655883_C	CATB_HUMAN_Cathepsin_B			5.705	0.7142	0.037745	22	11	1	9	29	13	1	11	34	11	1	9	0.84372	0.92873	0.822972	0.838825	0.988831	0.987519	1.20154	9.11355e+06	1.00365e+07	8.89419e+06	9.06141e+06	1.06738e+07	1.06685e+07	0.949205	0.00380465	3
PMI_017572		AMR68934.1 vitellogenin 1 [Patiria miniata] (id=70.29%; len=589; e=0.00E+00)			5.084	0.6559	0.000242	598	52	2	0	1006	53	4	0	1005	54	4	0	0.945852	0.966259	0.992095	0.986926	0.970471	0.964544	1.04889	1.80561e+09	1.84446e+09	1.89373e+09	1.88382e+09	1.85257e+09	1.84121e+09	0.948722	0.0038767	3
m.19013	25228	XP_022089668.1 inositol monophosphatase 3-like [Acanthaster planci] (id=83.57%; len=213; e=2.02E-123)			3.3	0.6095	0.308265					9	7	2	5	6	6	2	4	0.978871	0.943145	0.950269	1	0.940596	0.877998	1.13895	1.44242e+06	1.38984e+06	1.40027e+06	1.47355e+06	1.38605e+06	1.29396e+06	0.94861	0.00389361	2
PMI_028998		XP_022111228.1 sulfotransferase family cytosolic 1B member 1-like [Acanthaster planci] (id=79.47%; len=151; e=5.37E-83)			2.671	0.2295	0.389531	1	1	1	0	1	1	1	0	1	1	1	0	0.860602	0.994573	0.889712	0.909928	0.899337	0.961383	1.15567	138013	160146	143466	146169	144535	154889	0.94853	0.00390553	3
m.23387	Pmi_642672_G	GBRL2_BOVIN_Gamma-aminobutyric_acid_receptor-associated_p..CUT			2.918	0.4094	0.196012	2	2	2	0	3	2	2	0	4	4	4	0	0.834883	0.913424	0.920255	0.923684	0.923264	0.90672	1.10636	565929	616482	622103	629924	627363	614638	0.948513	0.00390819	3
PMI_010499		XP_022093111.1 uncharacterized protein LOC110980590 [Acanthaster planci] (id=38.64%; len=295; e=4.41E-39)			3.162	0.505	0.002061	14	4	0	0	28	4	0	0	42	4	0	0	0.968667	0.576194	0.959405	0.949501	0.63562	0.629946	1.68115	2.00463e+07	1.1919e+07	2.01218e+07	1.99845e+07	1.31234e+07	1.32048e+07	0.948476	0.00391366	3
PMI_008046		XP_022095227.1 myosin-VIIa-like isoform X1 [Acanthaster planci] (id=93.98%; len=880; e=0.00E+00)			5.357	0.6349	0.040539	8	7	0	6	19	15	1	11	19	16	0	13	0.925125	0.962524	0.989315	0.978144	0.951624	0.966041	1.06939	1.10455e+06	1.14909e+06	1.18094e+06	1.1677e+06	1.13623e+06	1.15324e+06	0.947753	0.00402328	3
PMI_015721,m.14102	None,Pmi_592330_n	XP_011674861.1 PREDICTED: ubiquinol-cytochrome-c reductase complex assembly factor 3-like [Strongylocentrotus purpuratus] (id=44.29%; len=70; e=1.18E-13) ,no_annot	1266	1	2.956	0.3919	0.349019	2	1	0	0	2	1	0	0	2	1	0	0	0.90973	0.971092	0.934032	0.953426	0.928377	0.969135	1.06745	584073	625808	602322	613852	597068	622946	0.947543	0.00405536	3
m.4298,m.3296	Pmi_457880_n,5841	no_annot,XP_022085613.1 uncharacterized protein LOC110976553 isoform X2 [Acanthaster planci] (id=82.03%; len=128; e=5.00E-72)	1149	2	3.37	0.403	0.652911					1	1	0	0	3	2	0	0	0.882753	0.687714	0.901463	1	0.612804	0.70415	1.63184	135263	105324	137408	154135	93019.5	107710	0.947505	0.00406121	2
m.14249,PMI_010985	Pmi_593400_L,None	LZIC_HUMAN_Protein_LZIC,XP_022090419.1 protein LZIC-like [Acanthaster planci] (id=93.16%; len=190; e=4.05E-115)	2338	4	5.107	0.6066	0.036099	3	3	0	1	1	1	0	0	3	3	0	2	0.799688	0.829104	0.746105	0.884983	0.809852	0.998736	1.3386	59314.5	61484	54878	65688.4	59646.7	74652.2	0.946845	0.00416309	3
m.54409	80941	XP_022092406.1 intraflagellar transport protein 27 homolog [Acanthaster planci] (id=89.53%; len=191; e=4.56E-129)			4.023	0.5565	0.035709	4	4	1	3	6	4	1	3	5	4	3	1	0.91925	0.974472	0.916614	0.851299	0.943984	0.976561	1.14714	481685	509574	479375	445615	493695	510664	0.946646	0.00419406	3
PMI_014649		XP_022093707.1 lysosome-associated membrane glycoprotein 1-like [Acanthaster planci] (id=54.26%; len=505; e=4.20E-165)			6.18	0.6728	0.011755	15	7	1	1	37	13	1	1	33	15	1	1	0.950107	0.959591	0.960649	0.971015	0.972876	0.97803	1.02939	1.44117e+07	1.45526e+07	1.45665e+07	1.47538e+07	1.47831e+07	1.48494e+07	0.946274	0.00425212	3
m.55641	82925	XP_022098964.1 centrosomal protein of 44 kDa-like isoform X1 [Acanthaster planci] (id=70.81%; len=596; e=0.00E+00)			6.388	0.6906	0.017722	29	16	0	14	50	25	0	19	54	29	0	21	1	0.890653	0.675721	0.686888	0.716728	0.747435	1.4799	1.07234e+07	9.48772e+06	7.19848e+06	7.33255e+06	7.59438e+06	7.95678e+06	0.94584	0.00432048	3
m.16704	Pmi_609620_S	S39AE_BOVIN_Zinc_transporter_ZIP14			5.503	0.6429	0.017199	33	9	4	5	53	13	4	9	55	11	4	7	0.99252	0.835963	0.939904	0.990702	0.844255	0.839087	1.18728	3.12989e+07	2.63171e+07	2.96653e+07	3.12578e+07	2.66123e+07	2.64432e+07	0.945473	0.00437881	3
m.27857	Pmi_658620_D	DDX55_CHICK_ATP-dependent_RNA_helicase_DDX55			5.958	0.6754	0.007381	16	12	0	10	20	12	0	11	19	13	0	11	0.934187	0.971496	0.995231	0.927865	0.932632	0.965601	1.0726	1.82573e+06	1.9012e+06	1.94871e+06	1.81764e+06	1.82302e+06	1.88705e+06	0.944813	0.00448439	3
PMI_000241		XP_022092476.1 centromere protein X-like [Acanthaster planci] (id=96.30%; len=81; e=6.48E-39)			2.869	0.489	0.241438	2	1	0	0	2	1	0	0	3	2	1	1	0.811974	0.838211	0.866142	0.849777	0.95278	0.837611	1.17341	92024.1	95875.9	98527.1	97837.2	107561	95510.8	0.944764	0.00449228	3
PMI_002929,m.35366,m.21792,PMI_000659	None,53257,Pmi_636081_P,None	XP_022093196.1 DNA primase large subunit-like [Acanthaster planci] (id=88.89%; len=477; e=0.00E+00) ,XP_022093196.1 DNA primase large subunit-like [Acanthaster planci] (id=91.63%; len=502; e=0.00E+00) ,PRI2_MOUSE_DNA_primase_large_subunit,XP_022093196.1 DNA primase large subunit-like [Acanthaster planci] (id=85.12%; len=504; e=0.00E+00)	1016	8	4.004	0.4954	0.306529	8	6	0	0	8	6	0	0	6	6	0	0	0.900161	0.978272	0.942483	0.945442	0.942804	0.954823	1.08677	501918	545895	524599	527562	524205	532100	0.94386	0.00463905	3
m.22795,m.34826	Pmi_640430_E,52508	EPHX4_HUMAN_Epoxide_hydrolase_4,XP_022103784.1 epoxide hydrolase 4-like [Acanthaster planci] (id=78.32%; len=346; e=0.00E+00)	2640	3	4.673	0.5087	0.253885	3	3	0	1	1	1	0	0	1	1	0	0	0.755733	0.800015	0.985445	0.730209	0.814064	0.787528	1.34954	106386	113243	142068	103125	115186	110955	0.943791	0.00465031	3
m.53366	79461	XP_022084647.1 multiple epidermal growth factor-like domains protein 6 [Acanthaster planci] (id=80.09%; len=1592; e=0.00E+00)			7.476	0.7897	0.000659	311	80	0	0	459	83	0	0	436	82	0	0	0.989391	0.978591	0.95127	0.955632	0.916275	0.962086	1.0798	1.08183e+08	1.06883e+08	1.03875e+08	1.04197e+08	1.00049e+08	1.0506e+08	0.943747	0.00465764	3
PMI_020682		ANN83889.1 centrin-2 [Patiria miniata] (id=100.00%; len=171; e=3.58E-117)			4.434	0.6186	0.021819	5	4	4	0	4	3	3	0	5	3	3	0	0.866327	0.910769	0.875318	0.979131	0.885553	0.846717	1.15639	781591	817708	783791	878280	791987	754983	0.943256	0.00473855	3
PMI_007601		XP_022083147.1 cysteine-rich motor neuron 1 protein-like isoform X2 [Acanthaster planci] (id=67.66%; len=303; e=2.39E-122)			2.219	0.3729	0.527854					2	1	1	0	2	1	1	0	0.664199	0.984337	0.763597	0.63953	0.976115	0.985296	1.54066	339857	503354	390716	326977	499318	503877	0.943235	0.004742	2
m.31614	Pmi_669821_C	C19L2_DANRE_CWF19-like_protein_2			6.388	0.6906	0.017722	25	13	0	0	40	20	0	0	44	23	0	0	1	0.875827	0.616629	0.656179	0.632942	0.723211	1.62172	7.6305e+06	6.65769e+06	4.69919e+06	4.99892e+06	4.80403e+06	5.48797e+06	0.942596	0.00484832	3
PMI_028117,PMI_030074		XP_022099538.1 retinol dehydrogenase 3-like [Acanthaster planci] (id=68.88%; len=196; e=4.64E-81) ,XP_022099538.1 retinol dehydrogenase 3-like [Acanthaster planci] (id=85.53%; len=159; e=1.21E-95)	9	1	2.235	0.3644	0.119815	1	1	0	0	2	1	0	0	1	1	0	0	0.984688	0.701721	0.892878	1	0.775921	0.885968	1.42507	3.536e+06	2.49891e+06	3.19789e+06	3.58729e+06	2.77904e+06	3.17726e+06	0.942172	0.00491938	3
m.16603	21895	OKZ19050.1 chromosome partitioning protein ParA [Bacteroides sp. 43_108] (id=28.33%; len=120; e=8.60E-01)			1.904	0.197	0.933678					1	1	1	0	1	1	1	0	0.568254	1	0.669822	0.461683	0.738174	0.771311	2.16599	24416.8	45669.2	29087.8	19054.2	32109.5	34409.6	0.94213	0.00492643	2
PMI_000355		XP_022096960.1 uncharacterized protein LOC110982676 isoform X1 [Acanthaster planci] (id=90.88%; len=285; e=0.00E+00)			4.146	0.5219	0.201712	5	4	1	3	6	6	2	4	8	6	2	4	0.82322	0.906754	0.874472	0.951006	0.874281	0.970361	1.17874	762206	840886	809339	880341	809131	900057	0.941092	0.00510307	3
PMI_028289		XP_022088001.1 peripheral plasma membrane protein CASK-like isoform X1 [Acanthaster planci] (id=98.09%; len=105; e=8.54E-62)			3.483	0.5543	0.131549	3	2	1	0	6	2	1	0	7	3	1	0	0.944273	0.806377	0.906527	0.975106	0.797216	0.747943	1.30372	8.46687e+06	7.24085e+06	8.13175e+06	8.75711e+06	7.14866e+06	6.71022e+06	0.940521	0.00520144	3
m.17520	Pmi_614890_U	UBIE_LISIN_Demethylmenaquinone_methyltransferase			5.224	0.6462	0.036402	7	6	1	1	11	8	1	5	14	11	1	6	0.902775	0.968361	0.884764	0.918993	0.978626	0.93002	1.10609	882438	942899	864382	897503	954846	905067	0.940487	0.00520726	3
PMI_019546		XP_022108953.1 uncharacterized protein LOC110989113 [Acanthaster planci] (id=55.38%; len=260; e=1.13E-71)			5.572	0.6276	0.003172	42	20	2	10	71	23	2	10	68	25	2	13	0.895215	0.977005	0.923403	0.898744	0.996118	1	1.11705	2.3001e+07	2.51001e+07	2.37277e+07	2.30935e+07	2.55885e+07	2.56887e+07	0.939941	0.00530223	3
m.25322,m.25870,PMI_004680	36444,Pmi_652120_R,None	XP_022083769.1 DNA-directed RNA polymerase III subunit RPC4-like [Acanthaster planci] (id=79.54%; len=303; e=7.69E-160) ,RPC4_HUMAN_DNA-directed_RNA_polymerase_III_subunit_RPC4,XP_022083769.1 DNA-directed RNA polymerase III subunit RPC4-like [Acanthaster planci] (id=78.60%; len=257; e=1.41E-139)	1860	1	2.906	0.4639	0.091477	1	1	0	0	2	1	0	0	1	1	0	0	0.905185	0.893166	0.906223	0.906741	0.941558	0.914484	1.05418	110807	109561	111674	111422	116503	112547	0.93959	0.00536375	3
m.15409	Pmi_601700_C	CH10_ORYLA_10_kDa_heat_shock_protein,_mitochondrial			4.238	0.5761	0.007992	18	9	6	3	25	12	6	4	20	11	7	3	0.961781	0.990711	0.908805	0.870245	0.914945	0.924229	1.13843	1.87417e+07	1.93164e+07	1.77249e+07	1.69701e+07	1.78239e+07	1.80172e+07	0.939339	0.00540798	3
PMI_025037,m.38414,PMI_004850,m.28717	None,58067,None,Pmi_661370_D	XP_022110715.1 extracellular serine/threonine protein kinase FAM20C-like [Acanthaster planci] (id=92.16%; len=357; e=0.00E+00) ,XP_022110715.1 extracellular serine/threonine protein kinase FAM20C-like [Acanthaster planci] (id=89.15%; len=470; e=0.00E+00) ,XP_022110715.1 extracellular serine/threonine protein kinase FAM20C-like [Acanthaster planci] (id=69.05%; len=168; e=1.62E-69) ,DMP4_MOUSE_Dent…	2093	2	4.503	0.573	0.214007	2	2	0	0	1	1	0	0	1	1	0	0	0.879621	0.910258	0.831692	0.837072	0.981655	0.902475	1.18031	56977.6	58800	54075.5	54321	63282	58407.9	0.9389	0.00548573	3
m.23082	Pmi_641463_R	RB11B_DISOM_Ras-related_protein_Rab-11B			4.814	0.6006	0.018088	29	12	2	9	36	13	2	10	38	13	2	10	0.968571	0.948141	0.996238	0.96866	0.945714	0.968069	1.05342	1.42145e+07	1.39146e+07	1.4621e+07	1.42159e+07	1.38788e+07	1.42071e+07	0.938029	0.00564164	3
m.23289	Pmi_642320_A	ATPB_HEMPU_ATP_synthase_subunit_beta,_mitochondrial			6.03	0.7026	0.01719	103	28	1	21	161	33	1	25	147	31	1	23	0.990943	0.90886	0.975027	0.954499	0.916647	0.934594	1.09031	5.64742e+07	5.17222e+07	5.55301e+07	5.43246e+07	5.21821e+07	5.31989e+07	0.93752	0.0057337	3
PMI_008712		XP_022087263.1 ATP-binding cassette sub-family D member 3-like isoform X2 [Acanthaster planci] (id=82.83%; len=664; e=0.00E+00)			4.406	0.5054	0.064155	3	2	0	0	10	9	0	9	8	7	0	7	0.850552	0.954183	0.898704	0.933675	0.943247	1	1.17571	1.21002e+06	1.36023e+06	1.27919e+06	1.33042e+06	1.34422e+06	1.42666e+06	0.937496	0.00573799	3
m.26219,m.27592	38136,Pmi_657940_P	XP_022098225.1 delta-1-pyrroline-5-carboxylate synthase-like [Acanthaster planci] (id=90.35%; len=808; e=0.00E+00) ,P5CS_MOUSE_Delta-1-pyrroline-5-carboxylate_synthase	1027	7	3.469	0.5515	0.093788	5	5	0	4	1	1	0	0	3	3	0	3	0.843315	0.821698	0.869942	0.892562	0.852231	0.933761	1.13638	146822	142666	152663	155389	147436	161756	0.936644	0.00589388	3
PMI_006417,m.26073	None,37892	XP_022108361.1 39S ribosomal protein L40, mitochondrial-like [Acanthaster planci] (id=83.50%; len=103; e=1.09E-56) ,XP_022108361.1 39S ribosomal protein L40, mitochondrial-like [Acanthaster planci] (id=82.50%; len=200; e=1.15E-120)	1612	3	4.206	0.6053	0.300279	2	2	0	0	1	1	0	0	4	3	0	0	0.650232	0.831739	0.756849	0.738849	0.854449	0.934003	1.43642	45023.6	58633.8	54471.9	51906.2	59444.8	66188.2	0.936035	0.00600647	3
PMI_028032		XP_022105185.1 RNA-binding protein MEX3B-like [Acanthaster planci] (id=90.02%; len=531; e=0.00E+00)			4.494	0.634	0.046118	5	4	4	0	6	6	6	0	9	8	8	0	0.549461	0.643974	0.689952	0.740917	0.874151	1	1.81997	406504	476137	510289	546593	646161	739338	0.935445	0.00611653	3
m.53721,m.30157	80033,Pmi_665801_S	XP_022085993.1 SUMO-activating enzyme subunit 1-like [Acanthaster planci] (id=89.37%; len=348; e=0.00E+00) ,SAE1_XENLA_SUMO-activating_enzyme_subunit_1	2232	5	4.054	0.6515	0.002962	6	4	0	3	3	3	0	2	7	4	0	4	0.805523	0.930625	0.926815	0.953285	0.927296	1	1.24143	568728	656930	653641	672957	655179	705998	0.934747	0.00624797	3
PMI_026590,m.17283	None,Pmi_613590_R	XP_022088599.1 28S ribosomal protein S5, mitochondrial-like [Acanthaster planci] (id=70.40%; len=402; e=0.00E+00) ,RT05_BOVIN_28S_ribosomal_protein_S5,_mitochondrial	1954	3	2.533	0.3036	0.825288					2	2	0	1	2	2	0	1	0.779913	0.82365	0.841656	0.804374	0.813234	1	1.28219	124690	132153	134679	128876	130416	161200	0.934503	0.00629436	2
m.55639	82924	XP_022098964.1 centrosomal protein of 44 kDa-like isoform X1 [Acanthaster planci] (id=71.21%; len=594; e=0.00E+00)			5.937	0.6906	0.017722	26	15	0	0	44	23	0	0	50	27	0	0	1	0.873796	0.654992	0.664234	0.690272	0.726805	1.52674	9.86671e+06	8.56399e+06	6.41767e+06	6.52101e+06	6.7195e+06	7.11782e+06	0.934296	0.00633373	3
PMI_011409		XP_022099963.1 uncharacterized protein LOC110984265 isoform X1 [Acanthaster planci] (id=71.72%; len=297; e=6.50E-139)			3.203	0.4727	0.200222	3	3	1	2	3	3	1	2	3	3	1	2	0.919699	0.631449	0.594814	0.699762	0.828276	0.97464	1.63856	174563	115508	108606	130871	155191	182254	0.933784	0.00643174	3
m.52250	77887	XP_022092160.1 adenosylhomocysteinase-like [Acanthaster planci] (id=92.41%; len=435; e=0.00E+00)			6.549	0.6949	0.000782	119	38	0	27	183	47	0	32	196	46	0	32	1	0.981181	0.974051	0.93039	0.992163	0.969936	1.07482	1.12796e+08	1.10678e+08	1.09871e+08	1.04923e+08	1.11913e+08	1.09392e+08	0.933695	0.00644879	3
m.13478,m.19732,PMI_022276,PMI_020384	Pmi_587770_R,26424,None,None	RB39B_BOVIN_Ras-related_protein_Rab-39B,XP_022089853.1 ras-related protein Rab-39B-like [Acanthaster planci] (id=96.24%; len=186; e=2.50E-131) ,XP_022089853.1 ras-related protein Rab-39B-like [Acanthaster planci] (id=95.61%; len=228; e=1.29E-162) ,XP_022089853.1 ras-related protein Rab-39B-like [Acanthaster planci] (id=95.17%; len=228; e=3.39E-162)	2567	3	3.53	0.4877	0.085637					7	2	0	0	6	2	0	1	0.971111	0.736442	0.998204	0.958202	0.753539	0.765599	1.35544	838411	634412	861270	825985	649466	659688	0.933536	0.00647942	2
m.53714	80014	XP_022095881.1 leucine-rich PPR motif-containing protein, mitochondrial-like [Acanthaster planci] (id=77.66%; len=488; e=0.00E+00)			5.124	0.6212	0.128701	14	8	0	2					15	12	1	4	0.886806	1	0.976355	0.912815	0.940465	0.983173	1.12764	901244	1.01599e+06	992137	927425	955531	998835	0.932311	0.00671762	2
m.39106	59075	XP_022084220.1 rab GTPase-activating protein 1-like isoform X2 [Acanthaster planci] (id=93.87%; len=995; e=0.00E+00)			5.373	0.6195	0.090096	7	6	0	6	8	8	0	8	8	7	0	7	0.83284	0.922653	0.922076	0.969275	0.925746	0.965665	1.16382	456129	504660	506022	530154	506519	528210	0.932103	0.00675858	3
PMI_021116		XP_022085986.1 cubilin-like isoform X3 [Acanthaster planci] (id=61.24%; len=1032; e=0.00E+00)			4.303	0.5533	0.068165	6	4	1	0	7	6	1	0	7	7	1	0	1	0.960202	0.59748	0.59096	0.621629	0.63026	1.69216	830993	796733	497689	490119	514421	523570	0.931238	0.00692982	3
PMI_005589		XP_022084206.1 adenylate kinase isoenzyme 5-like isoform X1 [Acanthaster planci] (id=64.39%; len=1056; e=0.00E+00)			3.39	0.454	0.202508	2	2	0	1	2	2	0	2	3	2	0	1	0.814404	0.907047	0.811752	0.858119	0.987186	0.943752	1.21612	141524	157572	144105	150748	172705	166215	0.931116	0.00695412	3
PMI_019730,m.24695	None,Pmi_647770_A	XP_022096223.1 A-kinase anchor protein 1, mitochondrial-like [Acanthaster planci] (id=65.51%; len=461; e=0.00E+00) ,AKAP1_HUMAN_A-kinase_anchor_protein_1,_mitochondrial	1969	3	3.664	0.4061	0.388812	2	2	0	0	2	2	0	0	2	2	0	1	0.829373	0.983385	0.931986	0.671345	0.843122	0.6101	1.61184	104898	125158	118185	85032.4	107194	77285	0.93043	0.00709167	3
PMI_009337		XP_022091701.1 kinesin-like protein KIF20B isoform X2 [Acanthaster planci] (id=52.72%; len=1728; e=0.00E+00)			3.531	0.5138	0.105578	5	5	1	2	11	11	4	4	15	13	2	11	0.828537	0.817898	0.865083	1	0.880017	0.910077	1.22265	597158	589656	624852	724013	633896	657396	0.930407	0.00709633	3
PMI_001656		XP_022079956.1 26S proteasome regulatory subunit 8 isoform X1 [Acanthaster planci] (id=99.76%; len=409; e=0.00E+00)			4.815	0.5729	0.006136	25	16	15	0	50	29	27	1	58	28	26	1	0.916069	0.941858	0.912586	0.900286	1	0.962354	1.11076	9.40815e+06	9.67334e+06	9.37175e+06	9.24538e+06	1.02718e+07	9.88566e+06	0.930317	0.00711436	3
PMI_012829		XP_022085826.1 peroxidasin homolog [Acanthaster planci] (id=73.45%; len=354; e=0.00E+00)			3.818	0.5597	0.015127	4	3	1	0	6	4	1	0	8	5	1	0	0.956434	1	0.73809	0.758457	0.737354	0.733007	1.36424	551842	576509	425674	437227	424926	422970	0.930062	0.00716593	3
m.24797	Pmi_648160_A	AL1A2_HUMAN_Retinal_dehydrogenase_2			5.466	0.7149	0.013696	54	22	1	0	74	29	1	0	80	29	1	0	0.978109	0.969651	0.965826	0.927235	0.999964	0.980046	1.07844	1.99588e+07	1.97846e+07	1.97084e+07	1.89256e+07	2.04001e+07	1.99989e+07	0.929116	0.00735876	3
m.25146	Pmi_649292_S	SOS1_HUMAN_Son_of_sevenless_homolog_1			2.634	0.1811	1.60757	1	1	0	0	1	1	0	0					0.827872	0.779963	0.830373	0.98301	0.933973	0.990047	1.26935	63240.3	59549	63439.8	75868.5	71576	76789	0.928986	0.0073854	2
PMI_005320		XP_022092088.1 xaa-Pro dipeptidase-like [Acanthaster planci] (id=88.06%; len=201; e=2.08E-130)			3.531	0.5372	0.045667					12	7	1	0	16	9	1	0	0.999698	0.851034	0.943107	0.974218	0.798493	0.795508	1.25668	5.03049e+06	4.28283e+06	4.74379e+06	4.90104e+06	4.01801e+06	4.00237e+06	0.928326	0.00752172	2
m.55618	82880	AMR68934.1 vitellogenin 1 [Patiria miniata] (id=100.00%; len=283; e=0.00E+00)			5.525	0.6634	0.006055					433	28	1	0	428	29	1	0	0.998442	0.776076	0.944406	0.870869	0.848015	0.758821	1.31578	7.19077e+08	5.55115e+08	6.77234e+08	6.24788e+08	6.06946e+08	5.41174e+08	0.928277	0.00753183	2
PMI_015523		XP_022082956.1 serine/arginine-rich splicing factor 7-like [Acanthaster planci] (id=70.14%; len=144; e=1.36E-58)			4.78	0.6037	0.013252	5	4	2	2	12	7	4	3	12	7	4	3	0.835834	0.929954	0.831892	0.874929	0.909682	1	1.20208	981636	1.09159e+06	976806	1.02679e+06	1.06731e+06	1.17439e+06	0.927821	0.00762676	3
PMI_000076		XP_022082031.1 bifunctional purine biosynthesis protein PURH-like [Acanthaster planci] (id=70.31%; len=650; e=0.00E+00)			5.92	0.7494	0.002776	105	35	0	0	172	39	0	0	179	41	0	0	0.96316	0.987761	0.938357	0.930303	0.993005	0.981598	1.0674	8.2769e+07	8.48635e+07	8.06293e+07	7.9976e+07	8.53173e+07	8.43537e+07	0.927592	0.00767462	3
PMI_022152		XP_022111132.1 echinoidin-like [Acanthaster planci] (id=63.08%; len=214; e=7.77E-88)			2.809	0.3631	0.401877					1	1	1	0	1	1	1	0	0.391463	0.995745	0.744374	0.890178	0.959458	0.401739	2.54365	2153.6	5742.42	4452.9	5154.33	5457.6	2289.53	0.926459	0.00791361	2
m.14786	Pmi_597250_S	SPSY_BOVIN_Spermine_synthase			5.765	0.6487	0.016092	16	7	1	6	26	16	3	12	22	14	2	11	0.945751	0.972795	0.960165	0.972953	0.939836	0.972909	1.03524	4.4292e+06	4.55399e+06	4.4953e+06	4.55864e+06	4.39769e+06	4.55506e+06	0.926091	0.00799203	3
PMI_028558,m.10062	None,Pmi_555340_R	XP_022096415.1 40S ribosomal protein S11-like [Acanthaster planci] (id=93.96%; len=149; e=6.82E-100) ,RS11_XENLA_40S_ribosomal_protein_S11	913	14	5.257	0.5536	0.029663	19	8	0	0	30	12	0	0	32	13	0	0	0.914781	1	0.934952	0.889465	0.894306	0.904719	1.12427	1.99248e+07	2.18069e+07	2.03948e+07	1.93975e+07	1.95052e+07	1.97189e+07	0.926064	0.00799764	3
m.18644,m.29940	Pmi_620774_n,44523	no_annot,XP_020618438.1 uncharacterized protein LOC110056321 [Orbicella faveolata] (id=44.06%; len=261; e=1.46E-60)	382	4	2.918	0.468	0.145949	4	3	0	0	5	4	0	0	4	2	0	0	0.957616	0.804691	0.893193	0.984153	0.824561	0.804467	1.22336	453906	382026	427153	470425	391648	381161	0.925714	0.00807269	3
m.13597	Pmi_588700_Y	Y1627_STAS1_Uncharacterized_oxidoreductase_SSP1627			5.49	0.6102	0.092276	12	9	0	9	17	12	0	10	17	9	0	9	0.901902	0.951852	0.934466	0.931537	0.9361	0.985253	1.09242	1.77143e+06	1.86256e+06	1.8314e+06	1.82071e+06	1.83083e+06	1.9332e+06	0.925278	0.0081664	3
PMI_026298		XP_022098742.1 serpin B6-like isoform X3 [Acanthaster planci] (id=80.87%; len=392; e=0.00E+00)			4.393	0.5607	0.006382	22	13	0	10	29	20	0	13	25	17	0	13	0.921891	0.993443	0.937414	0.904728	0.961832	0.989527	1.09806	5.81381e+06	6.26487e+06	5.90228e+06	5.70712e+06	6.06224e+06	6.24012e+06	0.925173	0.00818924	3
PMI_005944		XP_022108952.1 complement C3-like [Acanthaster planci] (id=74.81%; len=1457; e=0.00E+00)			4.509	0.591	0.006634	15	14	0	9	15	12	0	0	12	10	1	4	0.905434	0.947318	0.927421	0.943922	0.94925	0.969099	1.07031	1.26007e+06	1.31659e+06	1.28859e+06	1.31176e+06	1.31934e+06	1.34481e+06	0.923507	0.0085529	3
PMI_013253		XP_022096936.1 gamma-aminobutyric acid receptor-associated protein [Acanthaster planci] (id=100.00%; len=119; e=1.10E-82)			3.177	0.4054	0.015442	1	1	1	0	2	2	2	0	3	2	2	0	0.86044	0.921773	0.880449	0.772545	0.955194	0.943657	1.23642	595908	629851	606077	533633	658496	648471	0.922837	0.00870139	3
m.14866	Pmi_597820_T	TEN3_DANRE_Teneurin-3			4.363	0.5741	0.003152	1	1	0	0	2	2	0	0	3	3	1	2	0.827365	0.881401	0.816289	0.958313	0.880523	0.97294	1.19191	80939.5	85726.6	79045.8	92465.6	85907	94194.7	0.922741	0.00872282	3
PMI_007359		RDD40762.1 Tubulin beta-4B chain [Trichoplax sp. H2] (id=97.75%; len=445; e=0.00E+00)			6.033	0.6494	0.003897	135	27	0	18	222	30	0	3	229	32	0	3	0.967443	0.967958	0.966206	0.92654	1	0.949625	1.07928	9.75643e+07	9.76238e+07	9.74567e+07	9.34459e+07	1.00855e+08	9.57739e+07	0.922513	0.00877376	3
m.17168	Pmi_612890_n	no_annot			5.564	0.6398	0.01702	5	5	1	4	2	2	1	1	5	5	1	4	0.836761	0.779054	0.898614	0.963822	0.769605	0.77661	1.25236	173288	158528	188179	204857	155043	158187	0.922371	0.00880546	3
m.20574,m.29180,m.29182	Pmi_630520_I,43268,43274	IMA8_HUMAN_Importin_subunit_alpha-8,XP_022089693.1 importin subunit alpha-8-like [Acanthaster planci] (id=84.52%; len=252; e=6.47E-158) ,XP_022089693.1 importin subunit alpha-8-like [Acanthaster planci] (id=84.52%; len=252; e=5.61E-158)	1219	1	3.055	0.305	0.601612	1	1	0	0	1	1	0	0					0.30331	1	0.359007	0.119935	0.57277	0.713297	8.33784	2459.89	8455.72	2717.59	1380.78	4748.07	5597.42	0.922218	0.0088398	2
m.20814	28436	WP_085578098.1 MULTISPECIES: hypothetical protein [Pseudomonas] (id=25.95%; len=131; e=5.40E-02)			2.785	0.2984	0.030443					1	1	1	0	2	1	1	0	0.388538	0.843613	0.406219	0.400381	0.770827	1	2.57375	78979.2	169894	82389.1	80423.2	155421	201854	0.921687	0.00895925	2
m.27993	Pmi_659150_P	PARP2_MOUSE_Poly_[ADP-ribose]_polymerase_2			4.087	0.5486	0.046427	17	14	1	13	21	15	1	14					0.898232	0.923427	0.914244	0.947923	0.995905	0.997563	1.11059	2.10309e+06	2.16189e+06	2.14031e+06	2.21802e+06	2.33179e+06	2.33614e+06	0.921571	0.00898543	2
PMI_007940		XP_022103725.1 lupus La protein homolog [Acanthaster planci] (id=77.47%; len=426; e=0.00E+00)			5.357	0.6576	0.026372	29	20	3	0	48	28	4	0	41	28	5	0	0.895086	0.935932	0.909699	0.915025	0.945498	1	1.11721	4.97057e+06	5.20681e+06	5.05164e+06	5.0779e+06	5.26318e+06	5.57329e+06	0.921517	0.00899768	3
m.35553,m.22108	53570,Pmi_637133_F	XP_022093514.1 mitochondrial fission 1 protein-like [Acanthaster planci] (id=89.26%; len=149; e=1.30E-91) ,FIS1_HUMAN_Mitochondrial_fission_1_protein	1273	9	4.371	0.4807	0.187343	4	3	0	2	11	8	0	6	7	7	0	7	0.955005	0.929148	0.920775	0.83134	0.859518	0.873812	1.14875	697463	673203	667674	596274	621226	628933	0.921309	0.00904466	3
m.35479,PMI_001545	53437,None	XP_022098876.1 39S ribosomal protein L42, mitochondrial-like isoform X1 [Acanthaster planci] (id=71.52%; len=151; e=3.13E-74) ,XP_022098876.1 39S ribosomal protein L42, mitochondrial-like isoform X1 [Acanthaster planci] (id=63.16%; len=133; e=5.30E-49)	133	1	2.418	0.4835	0.220967					2	1	0	0	2	1	0	0	0.811021	0.911716	0.876743	0.962553	0.95327	1	1.23301	1.15837e+06	1.30395e+06	1.25308e+06	1.3779e+06	1.36316e+06	1.43143e+06	0.92105	0.00910361	2
m.19098	Pmi_623320_Z	ZN502_HUMAN_Zinc_finger_protein_502			3.356	0.4198	0.203319	2	1	0	0	2	1	1	0	1	1	1	0	0.866923	0.889869	0.866633	0.847547	0.917643	0.955671	1.12757	169487	175348	168078	168765	178862	189381	0.920363	0.00926056	3
m.31511	Background_P	no_annot			5.994	0.6774	0.00928	76	35	20	2	95	37	21	2	106	41	23	2	0.959537	0.947973	0.874125	0.894618	0.961041	1	1.144	4.2755e+07	4.22234e+07	3.89488e+07	3.98402e+07	4.27995e+07	4.45373e+07	0.920341	0.0092655	3
m.9428,m.7899	Pmi_548030_A,12499	AKT3_MOUSE_RAC-gamma_serine/threonine-protein_kinase,BAB69974.1 kinase Akt/PKB [Patiria pectinifera] (id=99.58%; len=240; e=2.31E-175)	363	1	3.239	0.3402	0.197698	1	1	0	0	1	1	0	0	1	1	0	0	0.7906	0.827362	0.820848	0.794898	0.813221	0.850341	1.07556	77724	85627.2	80865.3	78857.4	81917.4	85126.4	0.920263	0.00928356	3
m.19675	Pmi_626080_2	2A5D_RABIT_Serine/threonine-protein_phosphatase_2A_56_kDa..CUT			5.119	0.6077	0.041126	10	7	0	7	19	12	0	12	15	11	0	11	0.942476	0.982251	0.952175	0.947453	0.98433	0.996384	1.0572	1.42431e+06	1.4844e+06	1.43709e+06	1.43044e+06	1.48632e+06	1.50492e+06	0.919374	0.00948869	3
m.40068	60583	XP_022080175.1 sortilin-related receptor-like isoform X1 [Acanthaster planci] (id=52.10%; len=737; e=0.00E+00)			6.519	0.7032	0.016335	37	17	1	0	66	16	1	0	64	17	1	0	0.859711	0.9537	0.93111	0.967061	0.918574	1	1.16318	1.33588e+07	1.48766e+07	1.44996e+07	1.50906e+07	1.43112e+07	1.56197e+07	0.919302	0.00950542	3
m.30881	46064	XP_022094450.1 signal recognition particle subunit SRP72-like [Acanthaster planci] (id=93.06%; len=346; e=0.00E+00)			4.774	0.6081	0.016464	17	11	1	10	20	14	1	13	16	11	0	5	0.926275	0.945166	0.885768	0.872229	0.976291	0.970428	1.11931	1.78577e+06	1.8251e+06	1.70965e+06	1.68432e+06	1.88664e+06	1.87336e+06	0.919271	0.00951278	3
m.35979,m.25817	54213,Pmi_651811_F	XP_022098238.1 protein farnesyltransferase/geranylgeranyltransferase type-1 subunit alpha-like [Acanthaster planci] (id=86.27%; len=335; e=0.00E+00) ,FNTA_BOVIN_Protein_farnesyltransferase/geranylgeranyltra..CUT	998	11	4.737	0.6386	0.000509	9	7	0	6	11	9	0	0	14	12	0	9	0.922262	0.78438	0.960511	0.971319	0.800647	0.78893	1.23833	1.09645e+06	932913	1.14029e+06	1.16781e+06	950468	932936	0.918933	0.00959149	3
m.3937	Pmi_444000_Z	ZFY21_BOVIN_Zinc_finger_FYVE_domain-containing_protein_21			4.696	0.5952	0.000764	10	7	4	3	9	8	5	3	10	6	4	2	0.798371	0.962563	0.921734	0.948972	0.974046	0.987825	1.2373	439113	529768	507703	522537	536046	544266	0.918924	0.00959339	3
PMI_021786		XP_022086656.1 uncharacterized protein LOC110977121 isoform X3 [Acanthaster planci] (id=58.37%; len=920; e=0.00E+00)			3.757	0.4861	0.495256	5	4	1	2	3	3	1	1	5	4	1	2	0.763208	0.94104	0.849217	0.861038	0.945456	0.991082	1.29857	499034	615612	555369	563059	618518	648328	0.918706	0.00964447	3
PMI_009446		XP_022104828.1 T-complex protein 1 subunit delta-like [Acanthaster planci] (id=92.80%; len=528; e=0.00E+00)			5.438	0.6736	0.00884	60	28	5	17	85	30	4	19	84	31	5	19	0.973988	0.92766	1	0.940575	0.914317	0.909784	1.09916	2.55838e+07	2.43455e+07	2.62743e+07	2.4687e+07	2.39847e+07	2.38858e+07	0.918672	0.00965251	3
m.16673,m.9722	21986,Pmi_551392_n	XP_022096730.1 ras-associated and pleckstrin homology domains-containing protein 1-like isoform X5 [Acanthaster planci] (id=76.92%; len=104; e=6.42E-45) ,no_annot	126	1	2.969	0.3498	0.812251	1	1	0	0					1	1	0	0	0.928763	0.284525	0.258662	0.352858	0.536058	0.950739	3.6756	49461.3	15075.6	13217.2	18259.7	27849.7	50094.3	0.918416	0.00971241	2
m.6421	Pmi_504450_D	DAP1_HUMAN_Death-associated_protein_1			4.271	0.5667	0.031766	32	7	1	4	40	7	1	4	40	8	1	5	0.945702	0.941864	0.858602	0.917013	0.982809	0.986695	1.14919	1.03436e+07	1.03031e+07	9.38887e+06	1.00287e+07	1.07492e+07	1.07926e+07	0.918378	0.00972142	3
m.28399	Pmi_660443_A	AATM_CHICK_Aspartate_aminotransferase,_mitochondrial			5.845	0.6516	0.014494	33	20	1	19	56	29	0	17	47	24	1	20	0.923645	0.999417	0.939397	0.906276	0.957637	0.947965	1.10277	9.27583e+06	1.00401e+07	9.43823e+06	9.09498e+06	9.61734e+06	9.51631e+06	0.918376	0.00972177	3
m.35906,m.28387,m.35912	54084,Pmi_660451_G,54086	XP_022083452.1 uncharacterized protein LOC110975344 [Acanthaster planci] (id=63.81%; len=257; e=4.54E-99) ,GTSF1_MACFA_Gametocyte-specific_factor_1,XP_022083452.1 uncharacterized protein LOC110975344 [Acanthaster planci] (id=64.20%; len=257; e=6.75E-100)	2530	3	3.54	0.5036	0.129631	1	1	0	0	3	3	0	2	1	1	0	0	0.624664	0.667801	0.772585	0.650328	0.918631	0.84382	1.4706	20646.9	22098.8	25700.6	21625.5	30821.7	28061.7	0.91797	0.00981749	3
m.20363,m.39510	Pmi_629510_O,59622	OAT_HUMAN_Ornithine_aminotransferase,_mitochondrial,XP_022096613.1 ornithine aminotransferase, mitochondrial-like [Acanthaster planci] (id=88.11%; len=429; e=0.00E+00)	1355	20	6.07	0.6657	0.006132	29	18	0	17	36	16	0	15	36	18	0	16	0.921263	0.996751	0.882881	0.912381	0.966498	0.999052	1.13158	9.25946e+06	1.00367e+07	8.88027e+06	9.19028e+06	9.74067e+06	1.00597e+07	0.917235	0.00999171	3
m.28152	Pmi_659650_S	STRAP_CHICK_Serine-threonine_kinase_receptor-associated_..CUT			4.886	0.5877	0.021492	11	8	0	6	19	12	0	8	14	10	0	10	0.883659	0.954228	0.904643	0.903806	0.922972	1	1.13166	1.33607e+06	1.44088e+06	1.36622e+06	1.36563e+06	1.39292e+06	1.51027e+06	0.91606	0.0102731	3
m.36329	54686	XP_022100813.1 retinal dehydrogenase 1-like isoform X1 [Acanthaster planci] (id=89.98%; len=479; e=0.00E+00)			5.466	0.7149	0.013696	53	22	1	0	72	29	1	0	77	29	1	0	0.989043	0.974468	0.968926	0.934545	0.999276	0.981164	1.06926	1.93293e+07	1.90447e+07	1.89384e+07	1.82696e+07	1.95271e+07	1.91768e+07	0.915751	0.0103478	3
PMI_012766		XP_022107339.1 protein PAT1 homolog 1-like [Acanthaster planci] (id=71.24%; len=598; e=0.00E+00)			4.244	0.5672	0.003832	17	13	1	6	26	19	1	10	23	19	2	9	1	0.818497	0.602898	0.578092	0.543654	0.505714	1.9774	3.96367e+06	3.24012e+06	2.40416e+06	2.29588e+06	2.14843e+06	1.9977e+06	0.915616	0.0103806	3
m.22054	30597	XP_022081867.1 unconventional myosin-Va-like isoform X3 [Acanthaster planci] (id=78.05%; len=123; e=2.55E-52)			2.865	0.237	0.389319	1	1	1	0	2	2	2	0	2	2	2	0	0.789934	0.966165	0.876178	0.832357	0.878042	1	1.26593	1.42389e+06	1.73902e+06	1.57375e+06	1.5006e+06	1.58032e+06	1.80226e+06	0.914921	0.0105498	3
m.27476	39987	XP_022099074.1 uncharacterized protein LOC110983817 [Acanthaster planci] (id=60.56%; len=251; e=5.52E-86)			5.075	0.6193	0.015397	17	8	1	7	17	6	1	5	17	7	2	5	0.902221	0.888028	0.972502	0.921422	0.966289	0.985274	1.10951	1.8938e+06	1.86471e+06	2.04194e+06	1.93077e+06	2.02827e+06	2.07234e+06	0.914913	0.0105517	3
m.45584,PMI_028406,m.7561	68333,None,Pmi_523160_R	XP_022104689.1 40S ribosomal protein S26-like [Acanthaster planci] (id=94.44%; len=126; e=1.72E-80) ,XP_022104689.1 40S ribosomal protein S26-like [Acanthaster planci] (id=93.65%; len=126; e=1.26E-79) ,RS26_OCTVU_40S_ribosomal_protein_S26	1790	6	4.07	0.6049	0.037627	12	4	0	3	22	6	0	5	18	5	0	4	0.802174	0.909021	0.870101	0.675103	1	0.894995	1.48126	5.06305e+06	5.74593e+06	5.50295e+06	4.2523e+06	6.32363e+06	5.65343e+06	0.914818	0.0105748	3
m.23087	Pmi_641540_C	CHRD1_RAT_Cysteine_and_histidine-rich_domain-containing_p..CUT			3.516	0.4653	0.146772	4	3	1	2	3	2	1	1	4	3	1	2	0.892138	0.960796	0.859373	0.887991	0.902514	0.904041	1.11802	195765	209053	188852	194214	197335	199149	0.913354	0.0109361	3
PMI_028417		XP_022111969.1 uncharacterized protein LOC110991105 [Acanthaster planci] (id=74.22%; len=512; e=0.00E+00)			4.268	0.4888	0.07679	13	4	1	3	14	4	1	3	17	4	1	3	0.899027	0.883374	0.930691	0.978941	0.858454	0.942454	1.14035	1.78659e+07	1.74718e+07	1.85045e+07	1.94793e+07	1.6984e+07	1.87639e+07	0.913111	0.0109966	3
m.14769,PMI_020337,m.39329	Pmi_597150_P,None,59410	PCS2_LOTJA_Glutathione_gamma-glutamylcysteinyltransferase_2,XP_022097052.1 glutathione gamma-glutamylcysteinyltransferase 1-like [Acanthaster planci] (id=80.00%; len=230; e=5.82E-134) ,XP_022097052.1 glutathione gamma-glutamylcysteinyltransferase 1-like [Acanthaster planci] (id=80.44%; len=230; e=2.05E-134)	1560	5	3.053	0.5213	0.164926	2	2	0	2	7	4	0	1	4	3	0	3	0.835445	0.945157	0.919059	0.881238	0.851095	0.948193	1.13496	143217	161100	158181	148799	144776	161411	0.913041	0.011014	3
m.55357	82394	XP_022103395.1 3-ketodihydrosphingosine reductase-like [Acanthaster planci] (id=84.73%; len=334; e=0.00E+00)			3.528	0.4796	0.021886	2	1	1	0	3	3	1	0	1	1	1	0	0.808748	0.759849	0.819784	0.898694	0.913604	0.926838	1.21977	56986.3	53003.5	56104.5	63960	64694.5	65062.7	0.912992	0.0110262	3
PMI_022078		XP_022081967.1 protein TFG-like isoform X1 [Acanthaster planci] (id=80.29%; len=350; e=1.01E-163)			4.143	0.6079	0.022693	10	6	0	6	8	4	0	4	9	6	0	6	0.950545	0.8103	1	0.926498	0.814446	0.853072	1.23411	1.8596e+06	1.58842e+06	1.95878e+06	1.81451e+06	1.59197e+06	1.67139e+06	0.911608	0.0113744	3
m.39285	59335	XP_022105257.1 ribosome-binding protein 1-like isoform X4 [Acanthaster planci] (id=68.03%; len=147; e=2.88E-48)			4.989	0.4524	0.013299	11	6	0	2	11	7	1	6					0.876403	0.902143	0.931977	0.988083	0.985389	0.982169	1.12743	3.3851e+06	3.48545e+06	3.60278e+06	3.82088e+06	3.80845e+06	3.79093e+06	0.911328	0.0114455	2
PMI_022185		XP_022104396.1 mitogen-activated protein kinase kinase kinase 2-like isoform X2 [Acanthaster planci] (id=79.94%; len=618; e=0.00E+00)			3.953	0.5282	0.184754	3	3	1	1					3	3	0	2	0.741304	1	0.940174	0.931071	0.865291	0.830772	1.34897	60220.7	81597.7	76276.3	75764.8	70445.9	67795.1	0.911178	0.0114836	2
PMI_001404		PIK43635.1 putative cytochrome b-c1 complex subunit 9-like [Apostichopus japonicus] (id=61.77%; len=68; e=4.92E-21)			2.745	0.5304	0.280055	2	2	2	0	2	2	2	0	3	3	3	0	0.842693	0.784758	0.906017	0.858476	0.915533	0.912217	1.16664	111120	100834	119701	111891	119342	118390	0.910903	0.0115537	3
m.16437	Pmi_608170_A	ARL6_MOUSE_ADP-ribosylation_factor-like_protein_6			3.446	0.5264	0.14245	7	5	0	5	7	5	0	3	5	4	0	4	0.940431	0.810139	0.906839	1	0.795428	0.904193	1.25719	518577	444883	497929	550769	437602	496832	0.910853	0.0115666	3
m.28559	Pmi_660980_P	PRI1_MOUSE_DNA_primase_small_subunit			3.665	0.5072	0.024443	11	10	0	10	14	11	0	11	10	9	0	9	0.870115	0.932879	0.917512	0.926169	0.944033	0.974396	1.11985	1.15758e+06	1.24329e+06	1.22383e+06	1.23571e+06	1.25913e+06	1.30404e+06	0.910543	0.0116458	3
m.27498	Pmi_657530_P	PYR1_SQUAC_CAD_protein			5.458	0.6205	0.000884	67	38	0	0					109	49	0	0	0.992478	0.898219	0.997433	0.988739	0.932542	0.936306	1.11046	3.36239e+07	3.04461e+07	3.37838e+07	3.35017e+07	3.15844e+07	3.17225e+07	0.910489	0.0116598	2
m.40987	62029	XP_022082566.1 trifunctional purine biosynthetic protein adenosine-3-like [Acanthaster planci] (id=84.11%; len=1013; e=0.00E+00)			4.857	0.6231	0.020556	23	16	2	14	33	24	1	22	37	21	2	18	0.903729	0.954508	0.945909	0.918668	1	0.975403	1.10653	5.6769e+06	5.99801e+06	5.94124e+06	5.77062e+06	6.28605e+06	6.13187e+06	0.910457	0.011668	3
PMI_005555		XP_022107274.1 dynamin-1-like protein [Acanthaster planci] (id=87.87%; len=783; e=0.00E+00)			5.117	0.6271	0.042628	22	19	0	16					28	23	0	20	0.906641	0.867455	0.900832	0.996415	0.925172	0.977853	1.14867	2.06444e+06	1.973e+06	2.04929e+06	2.26845e+06	2.1038e+06	2.22256e+06	0.910051	0.0117723	2
PMI_022217		XP_022089668.1 inositol monophosphatase 3-like [Acanthaster planci] (id=82.38%; len=193; e=9.26E-108)			3.962	0.4969	0.046891	14	11	1	10	13	12	1	11	9	9	1	8	0.964216	0.910764	0.926709	1	0.907339	0.870082	1.14932	3.17199e+06	2.99493e+06	3.04662e+06	3.28958e+06	2.98283e+06	2.86422e+06	0.909848	0.0118247	3
m.31282	Pmi_669050_N	NUP98_RAT_Nuclear_pore_complex_protein_Nup98-Nup96			6.019	0.7067	0.004252	19	14	1	13	23	21	2	11	24	18	1	10	0.968263	0.919318	0.855402	0.932174	0.927984	0.952805	1.13194	2.2284e+06	2.09517e+06	1.96445e+06	2.14448e+06	2.12456e+06	2.17897e+06	0.909041	0.0120341	3
PMI_005967		XP_022095904.1 proteasome subunit alpha type-5-like [Acanthaster planci] (id=95.44%; len=241; e=7.39E-172)			6.709	0.7029	0.007235	19	10	10	0	37	17	17	0	46	20	20	0	0.941944	0.970885	0.937206	0.925128	0.988762	0.974316	1.06878	7.64055e+06	7.87552e+06	7.60207e+06	7.49678e+06	8.01185e+06	7.89357e+06	0.908004	0.0123057	3
m.27203,PMI_004704	Pmi_656540_X,None	XPO2_DANRE_Exportin-2,XP_022090609.1 exportin-2-like [Acanthaster planci] (id=82.77%; len=998; e=0.00E+00)	210	40	5.253	0.6784	0.008399	45	27	0	24	64	38	0	0	64	40	0	0	0.989423	0.948157	0.990628	0.963081	0.987296	0.980741	1.04479	1.50962e+07	1.44648e+07	1.51175e+07	1.46958e+07	1.50621e+07	1.49613e+07	0.907823	0.0123534	3
m.23430	Pmi_642822_V	VATH_MOUSE_V-type_proton_ATPase_subunit_H			4.215	0.5573	0.028418	30	19	4	15	34	19	3	14	34	21	3	17	0.969641	0.947322	0.980754	0.984889	0.997674	0.970902	1.05315	4.06783e+06	3.97405e+06	4.114e+06	4.13061e+06	4.18485e+06	4.07192e+06	0.907594	0.0124139	3
PMI_004113		XP_022097041.1 digestive cysteine proteinase 2-like [Acanthaster planci] (id=82.68%; len=179; e=7.57E-106)			4.697	0.6183	0.040933	9	5	2	0	8	4	1	0	11	5	2	0	0.899133	0.923908	0.910658	0.818455	0.96087	0.957029	1.174	692606	714075	704082	634156	740056	740009	0.907351	0.0124782	3
PMI_023086		XP_022101486.1 cathepsin B-like [Acanthaster planci] (id=67.98%; len=331; e=4.10E-156)			5.705	0.7142	0.037745	22	10	0	5	29	12	0	6	33	10	0	5	0.859916	0.94043	0.842483	0.863045	0.98779	0.988115	1.17286	9.54939e+06	1.04493e+07	9.35726e+06	9.5861e+06	1.09666e+07	1.09781e+07	0.906768	0.0126332	3
m.8119,m.9979	12773,Pmi_554750_T	XP_022105706.1 transmembrane protein 41B-like isoform X1 [Acanthaster planci] (id=85.39%; len=260; e=4.92E-157) ,TM41B_XENLA_Transmembrane_protein_41B	2424	2	2.416	0.4015	0.193323	2	2	0	0					2	2	0	0	0.665868	0.721617	0.805529	0.863508	1	0.867281	1.5018	100516	109002	121609	130311	151451	131252	0.906687	0.0126546	2
m.20561	Pmi_630460_A	AL7A1_BOVIN_Alpha-aminoadipic_semialdehyde_dehydrogenase			6.4	0.6858	0.00064	53	24	16	8	72	27	20	7	72	29	21	8	0.870818	0.980853	0.906898	0.959848	0.905695	0.966169	1.12636	2.41088e+07	2.71192e+07	2.50808e+07	2.65378e+07	2.50549e+07	2.67558e+07	0.906566	0.0126871	3
PMI_017918		XP_022102070.1 arylacetamide deacetylase-like 3 [Acanthaster planci] (id=68.12%; len=389; e=0.00E+00)			2.784	0.338	0.997122	2	2	0	1	2	2	0	0	2	2	0	1	0.990204	0.833367	0.899262	0.976416	0.843821	0.815503	1.21423	332325	280835	300164	326458	281613	273492	0.90486	0.0131467	3
PMI_011596		XP_022101422.1 paladin-like [Acanthaster planci] (id=85.80%; len=655; e=0.00E+00)			4.367	0.4703	0.003619	5	5	0	2	3	3	0	2	2	2	0	2	0.811574	0.863943	0.847441	0.942037	0.787911	0.900242	1.19561	138932	146892	145453	162965	133244	151987	0.904835	0.0131536	3
m.53381	79464	XP_022084647.1 multiple epidermal growth factor-like domains protein 6 [Acanthaster planci] (id=78.02%; len=1879; e=0.00E+00)			7.476	0.7897	0.000659	313	82	0	2	474	85	0	3	455	84	0	71	0.993258	0.983736	0.954717	0.951328	0.924621	0.968662	1.07423	1.13157e+08	1.11915e+08	1.08589e+08	1.0804e+08	1.05142e+08	1.10173e+08	0.904799	0.0131635	3
m.49868	74667	XP_022090609.1 exportin-2-like [Acanthaster planci] (id=86.19%; len=963; e=0.00E+00)			5.513	0.6784	0.008399	45	27	0	24	64	38	0	0	63	39	0	0	0.990197	0.948856	0.990764	0.962602	0.987656	0.981293	1.04417	1.50936e+07	1.44616e+07	1.51051e+07	1.46742e+07	1.50535e+07	1.49555e+07	0.90467	0.0131986	3
m.25756	Pmi_651462_A	ALDOC_CARAU_Fructose-bisphosphate_aldolase_C			6.39	0.6826	0.003785	83	29	0	19	110	31	0	19	120	34	0	21	0.939005	0.995346	0.912882	0.893903	0.973175	0.970272	1.11348	3.58932e+07	3.80588e+07	3.48987e+07	3.41798e+07	3.71957e+07	3.70919e+07	0.904377	0.0132785	3
m.19717	Pmi_626260_T	TSN_CHICK_Translin			4.851	0.6312	0.073316	10	6	3	3	11	8	3	5	10	8	3	5	0.91373	0.934213	0.968463	0.944116	0.982766	0.989145	1.08254	2.41417e+06	2.47091e+06	2.56195e+06	2.49703e+06	2.60009e+06	2.61794e+06	0.90431	0.0132969	3
PMI_009833		XP_022090035.1 peptidyl-prolyl cis-trans isomerase H-like [Acanthaster planci] (id=89.94%; len=179; e=1.09E-114)			3.829	0.5905	0.068592	13	7	0	1	18	8	1	7	15	5	1	4	0.939775	0.647614	0.904093	0.987233	0.676026	0.652594	1.52442	4.63064e+07	3.20641e+07	4.45161e+07	4.87881e+07	3.33747e+07	3.22434e+07	0.904227	0.0133194	3
PMI_005734		XP_022086977.1 cytochrome c oxidase assembly factor 3, mitochondrial-like [Acanthaster planci] (id=90.82%; len=98; e=5.65E-60)			3.347	0.4192	0.081952					6	3	3	0	9	3	3	0	0.977903	0.938633	0.857193	0.854501	0.998479	0.930767	1.16849	344462	330688	301988	300993	351766	327848	0.903811	0.0134335	2
m.6595,PMI_018830	Pmi_507580_N,None	NDST4_MOUSE_Bifunctional_heparan_sulfate_N-deacetylase/N-su..CUT,XP_022105719.1 bifunctional heparan sulfate N-deacetylase/N-sulfotransferase 4-like [Acanthaster planci] (id=79.95%; len=883; e=0.00E+00)	1292	1	1.89	0.2486	1.52389	1	1	0	0					1	1	0	0	0.757505	1	0.607931	0.542967	0.72901	0.666105	1.84173	123820	163199	98290.7	87701	117709	107737	0.903725	0.0134572	2
PMI_012650		XP_022083752.1 glycerol-3-phosphate phosphatase-like isoform X2 [Acanthaster planci] (id=82.57%; len=218; e=5.27E-130)			3.576	0.527	0.060971	3	3	0	2					6	5	0	0	0.950274	0.719619	0.979713	1	0.742848	0.790694	1.38962	435727	330831	449349	458763	341392	362401	0.903385	0.0135507	2
m.29051	Pmi_662281_G	GALC_XENLA_Galactocerebrosidase			4.134	0.5428	0.141885					15	11	0	1	15	12	0	0	1	0.880694	0.956753	0.942621	0.947351	0.905795	1.13547	2.52286e+06	2.21854e+06	2.41328e+06	2.37498e+06	2.38903e+06	2.28261e+06	0.902998	0.0136576	2
PMI_017833		XP_022109357.1 advillin-like isoform X2 [Acanthaster planci] (id=89.12%; len=377; e=0.00E+00)			4.227	0.5453	0.005719	12	9	1	0	17	13	1	0	17	11	1	0	0.911547	0.930084	0.928846	0.884291	0.938544	0.961413	1.08721	2.59576e+06	2.64876e+06	2.64476e+06	2.51818e+06	2.67266e+06	2.7378e+06	0.902825	0.0137057	3
m.29394	Pmi_663453_T	TX264_HUMAN_Testis-expressed_sequence_264_protein			4.015	0.6106	0.025663	5	3	1	2	8	4	2	2	8	4	2	2	0.97006	0.846387	0.902311	0.825893	0.945124	0.796112	1.2185	1.71502e+06	1.48664e+06	1.59657e+06	1.47055e+06	1.68692e+06	1.39332e+06	0.902785	0.0137169	3
m.10585,m.21046	Pmi_561570_T,28863	TXLNA_HUMAN_Alpha-taxilin,XP_022089846.1 alpha-taxilin-like isoform X2 [Acanthaster planci] (id=79.49%; len=434; e=0.00E+00)	2231	17	5.062	0.6019	0.044487	13	12	0	9	9	8	0	5	17	13	0	9	0.903437	0.936032	0.924228	0.920714	0.960843	0.982655	1.08769	1.59543e+06	1.65299e+06	1.63258e+06	1.62733e+06	1.69848e+06	1.73638e+06	0.902686	0.0137441	3
m.18991	25181	XP_022111501.1 peroxisomal membrane protein 4-like [Acanthaster planci] (id=83.09%; len=207; e=5.43E-130)			2.578	0.4388	0.341473	2	2	0	1	4	4	0	3	3	3	1	2	0.835898	0.953696	0.894388	0.864847	0.939129	0.930285	1.14092	379489	433961	407802	394822	425940	424429	0.902313	0.013848	3
m.14588,PMI_005157	Pmi_595880_R,None	RT25_BOVIN_28S_ribosomal_protein_S25,_mitochondrial,XP_022081165.1 28S ribosomal protein S25, mitochondrial-like [Acanthaster planci] (id=90.37%; len=135; e=2.41E-78)	298	2	3.754	0.5217	0.199717	3	2	0	1	1	1	0	0	1	1	0	0	0.653744	0.846036	0.805461	0.608371	0.989693	0.823078	1.62679	78139	100807	96703	72655.6	118209	98664.3	0.90227	0.01386	3
m.18249	Pmi_618741_N	NOLC1_RAT_Nucleolar_and_coiled-body_phosphoprotein_1			3.787	0.4013	0.148302	2	2	0	2	3	3	0	3	4	4	0	4	0.983402	0.578522	0.471509	0.671072	0.639441	0.902436	2.08565	260582	148142	120795	174265	162340	233820	0.901789	0.0139944	3
m.12021,PMI_019307	Pmi_576060_C,None	CISD2_RANCA_CDGSH_iron-sulfur_domain-containing_protein_2,XP_022110710.1 CDGSH iron-sulfur domain-containing protein 1-like [Acanthaster planci] (id=71.17%; len=111; e=3.46E-47)	630	5	4.262	0.5896	0.061483	8	3	0	0	14	4	0	3	13	5	0	3	0.838519	0.946291	0.86016	0.846779	0.937891	1	1.19258	5.16954e+06	5.84632e+06	5.30083e+06	5.23455e+06	5.79087e+06	6.18052e+06	0.901294	0.0141334	3
m.11344	Pmi_569070_C	CRJ1A_TRICY_Crystallin_J1A			6.213	0.6531	0.001907	62	23	0	21	96	25	0	21	101	25	0	23	0.949031	0.975219	0.936486	0.922321	0.986296	0.993745	1.07744	5.48144e+07	5.63253e+07	5.40872e+07	5.32944e+07	5.69824e+07	5.73895e+07	0.901115	0.0141838	3
m.30697	45796	XP_022085438.1 putative all-trans-retinol 13,14-reductase [Acanthaster planci] (id=85.16%; len=519; e=0.00E+00)			5.363	0.6538	0.015463	15	13	1	0					15	14	1	7	0.806536	0.951833	0.891676	0.86045	1	0.963433	1.23987	1.3292e+06	1.56826e+06	1.46905e+06	1.4181e+06	1.64812e+06	1.58768e+06	0.901089	0.0141911	2
m.8118,PMI_020907	Pmi_531600_n,None	no_annot,XP_022093515.1 uncharacterized protein LOC110980818 [Acanthaster planci] (id=58.71%; len=264; e=1.36E-108)	268	7	5.233	0.7432	0.022484	15	6	0	0	19	6	0	0	20	7	0	0	0.975676	0.949317	0.905141	0.807188	0.998127	0.957427	1.23655	5.81475e+06	5.65549e+06	5.39734e+06	4.81079e+06	5.9447e+06	5.70939e+06	0.900775	0.0142798	3
m.31582	Pmi_669742_T	TLL1_CHICK_Tolloid-like_protein_1			2.911	0.5462	0.051395	2	1	1	0	3	3	3	0	5	5	4	1	1	0.862622	0.740598	0.653719	0.618997	0.56412	1.77267	1.28485e+06	1.10295e+06	956430	847615	803641	728112	0.899715	0.0145814	3
m.40730,m.40727	61592,61589	XP_022080395.1 uncharacterized protein LOC110973697 [Acanthaster planci] (id=45.88%; len=255; e=1.20E-72) ,XP_022080399.1 uncharacterized protein LOC110973699 [Acanthaster planci] (id=50.59%; len=168; e=1.93E-50)	2517	14	6.166	0.6795	0.001986	47	15	0	9	77	14	0	8	72	13	0	6	0.933052	0.82429	0.939389	0.94151	0.977912	0.972946	1.18637	1.28296e+07	1.13249e+07	1.29435e+07	1.29609e+07	1.34451e+07	1.33619e+07	0.899131	0.0147486	3
PMI_021237		XP_022104948.1 nucleolar protein 8-like [Acanthaster planci] (id=55.80%; len=1095; e=0.00E+00)			1.99	0.3266	0.355832					1	1	1	0	1	1	1	0	0.560987	1	0.633238	0.874394	0.540451	0.751134	1.85031	30054.9	53701	33799.5	46984.2	28883.2	40513.8	0.898955	0.0147993	2
m.20919,m.24277	Pmi_632050_R,34532	RT31_BOVIN_28S_ribosomal_protein_S31,_mitochondrial,XP_022089991.1 28S ribosomal protein S31, mitochondrial-like [Acanthaster planci] (id=69.21%; len=406; e=0.00E+00)	2418	2	3.381	0.3969	0.743468	1	1	0	0					1	1	0	0	0.647664	0.814444	1	0.753054	0.74403	0.982925	1.54401	46916.2	58985.4	72406.8	54544.5	53910.1	71174.5	0.898839	0.0148326	2
m.24762,m.18346	35398,Pmi_619320_N	XP_022099440.1 N-alpha-acetyltransferase 40-like isoform X1 [Acanthaster planci] (id=82.99%; len=241; e=1.14E-135) ,NAA40_DANRE_N-alpha-acetyltransferase_40	2221	3	3.656	0.4352	0.73441	1	1	0	0					2	2	0	0	0.793883	0.872486	0.799456	0.765911	0.910924	1	1.30563	97134.6	107254	98065.7	93749.2	111739	123037	0.898361	0.0149708	2
PMI_005041,m.29589	None,43973	XP_002733992.1 PREDICTED: sialic acid synthase-like [Saccoglossus kowalevskii] (id=72.85%; len=361; e=0.00E+00) ,XP_002733992.1 PREDICTED: sialic acid synthase-like [Saccoglossus kowalevskii] (id=74.86%; len=350; e=0.00E+00)	804	1	5.43	0.6554	0.026524					20	14	0	0	27	15	0	0	0.919193	1	0.939578	0.956997	0.987289	0.976598	1.08791	4.20241e+06	4.57195e+06	4.29563e+06	4.37561e+06	4.51406e+06	4.4649e+06	0.898299	0.0149888	2
PMI_003451		XP_022094710.1 proteasome subunit beta type-7-like [Acanthaster planci] (id=95.19%; len=270; e=0.00E+00)			6.607	0.6253	0.035668	21	12	0	3	33	17	0	13	30	16	0	14	0.956236	0.949106	0.929121	0.893483	0.99199	0.989961	1.11025	6.52786e+06	6.47939e+06	6.34303e+06	6.1001e+06	6.77188e+06	6.75825e+06	0.898099	0.0150467	3
PMI_024207		XP_022108072.1 uncharacterized protein LOC110988646 isoform X2 [Acanthaster planci] (id=74.86%; len=175; e=2.34E-93)			4.919	0.5593	0.516665					5	3	1	0	9	7	1	2	0.67878	0.87981	0.922024	1	0.752995	0.893673	1.47323	1.30832e+06	1.69498e+06	1.77454e+06	1.92588e+06	1.44831e+06	1.71902e+06	0.898015	0.0150712	2
m.18971	Pmi_622620_R	RAB3C_BOVIN_Ras-related_protein_Rab-3C			4.579	0.6119	0.003904	4	3	2	1	7	4	2	1	8	6	4	2	0.847599	0.840186	0.966962	0.964565	0.918195	0.903871	1.15089	908091	899790	1.0361e+06	1.03388e+06	984098	968155	0.897992	0.0150776	3
PMI_012195		KRX92830.1 Calmodulin, partial [Trichinella pseudospiralis] (id=99.33%; len=149; e=3.35E-102)			6.114	0.6407	0.03411	62	11	1	8	74	15	1	11	68	11	1	9	0.992428	0.808591	0.956979	0.980933	0.832852	0.794746	1.24874	2.90655e+07	2.3594e+07	2.80891e+07	2.87659e+07	2.44494e+07	2.32886e+07	0.897064	0.0153485	3
m.29810	44318	KIJ12960.1 hypothetical protein PAXINDRAFT_82162 [Paxillus involutus ATCC 200175] (id=29.20%; len=113; e=7.30E+00)			2.509	0.1682	0.138716	1	1	1	0	1	1	1	0					0.808259	0.93008	0.781857	0.708829	0.961757	0.992946	1.40082	155683	178826	150482	135467	185225	191917	0.897042	0.0153548	2
PMI_014676		XP_022110123.1 phosphoribosylformylglycinamidine synthase-like isoform X1 [Acanthaster planci] (id=88.20%; len=822; e=0.00E+00)			6.131	0.6769	0.023769	28	18	1	10	34	19	1	0	33	19	1	10	0.922365	0.945154	0.974576	0.952372	0.948208	0.970331	1.05661	5.09655e+06	5.21701e+06	5.38689e+06	5.25823e+06	5.23537e+06	5.3554e+06	0.896801	0.0154254	3
m.29533	Pmi_664000_U	USO1_BOVIN_General_vesicular_transport_factor_p115			4.36	0.6412	0.005088	17	13	2	11	16	13	2	11	21	18	3	15	0.806218	0.94533	0.900499	0.9756	0.850023	1	1.24036	1.02144e+06	1.20035e+06	1.1426e+06	1.23992e+06	1.07898e+06	1.27054e+06	0.896697	0.015456	3
m.31572	Pmi_669690_C	CCAR1_XENLA_Cell_division_cycle_and_apoptosis_regulator_..CUT			4.255	0.5713	0.034839	9	6	0	6	5	5	0	5	6	5	0	5	0.852306	0.995561	0.865222	0.804212	0.980955	0.954142	1.23793	666398	779388	676221	629337	768211	746347	0.896369	0.0155527	3
m.11991,m.16899	Pmi_575860_P,22243	PITH1_DANRE_PITH_domain-containing_protein_1,XP_022093599.1 PITH domain-containing protein 1-like [Acanthaster planci] (id=90.16%; len=193; e=1.53E-127)	1892	10	5.462	0.6215	0.005744	20	10	0	6	25	13	0	8	22	11	0	6	0.908573	0.977369	0.943873	0.844828	0.986444	0.95323	1.16763	2.07242e+06	2.22902e+06	2.15326e+06	1.92745e+06	2.24868e+06	2.17401e+06	0.896145	0.0156186	3
PMI_001777,m.23189,PMI_005984	None,Pmi_641880_H,None	XP_022091228.1 uncharacterized protein LOC110979588 isoform X1 [Acanthaster planci] (id=83.83%; len=303; e=0.00E+00) ,HPCD_METS5_3-hydroxypropionyl-coenzyme_A_dehydratase,XP_022091228.1 uncharacterized protein LOC110979588 isoform X1 [Acanthaster planci] (id=83.50%; len=303; e=0.00E+00)	2629	11	4.117	0.5564	0.004224	7	5	0	0	13	11	0	0	14	8	0	0	0.858463	1	0.901728	0.952141	0.900798	0.935038	1.16487	1.41739e+06	1.64936e+06	1.48934e+06	1.57072e+06	1.48009e+06	1.53992e+06	0.895904	0.0156901	3
m.25881	37503	XP_022108472.1 inosine-5'-monophosphate dehydrogenase 2-like isoform X2 [Acanthaster planci] (id=92.46%; len=517; e=0.00E+00)			6.055	0.6355	0.01122					34	20	1	16	38	25	2	13	0.893494	0.980273	0.892178	0.904583	1	0.980469	1.12085	8.36851e+06	9.18122e+06	8.35636e+06	8.47221e+06	9.3659e+06	9.18311e+06	0.895817	0.0157158	2
PMI_014032		XP_022104560.1 protein transport protein Sec31A-like isoform X1 [Acanthaster planci] (id=81.88%; len=1104; e=0.00E+00)			5.096	0.627	0.001251	15	11	1	1	17	13	1	1	17	14	1	1	0.871078	0.915431	0.91779	0.909312	0.960825	0.989058	1.13544	1.63283e+06	1.7118e+06	1.71911e+06	1.70398e+06	1.80378e+06	1.85255e+06	0.895596	0.0157812	3
m.39194,m.39207	59256,59261	XP_022087871.1 protein HGV2-like isoform X2 [Acanthaster planci] (id=71.29%; len=526; e=0.00E+00) ,XP_022087871.1 protein HGV2-like isoform X2 [Acanthaster planci] (id=70.70%; len=512; e=0.00E+00)	875	10	5.937	0.7359	0.002746	70	24	0	3	114	31	0	0	119	34	0	0	0.886058	0.959817	0.923268	0.895936	0.962179	1	1.12859	6.14134e+07	6.65071e+07	6.39696e+07	6.20809e+07	6.6662e+07	6.925e+07	0.895388	0.0158431	3
m.29054,m.22996	43084,Pmi_641210_S	XP_022109439.1 succinyl-CoA:3-ketoacid coenzyme A transferase 1, mitochondrial-like [Acanthaster planci] (id=86.48%; len=525; e=0.00E+00) ,SCOT1_HUMAN_Succinyl-CoA_3-ketoacid-coenzyme_A_transfera..CUT	2122	16	5.594	0.7022	0.042494	16	11	0	9	25	17	0	12	27	17	0	14	0.921176	0.987672	0.914127	0.936031	0.964863	0.976035	1.08045	4.51436e+06	4.84531e+06	4.48007e+06	4.58958e+06	4.73503e+06	4.79079e+06	0.895095	0.0159304	3
m.31514,PMI_016857	Pmi_669072_S,None	SSRD_RAT_Translocon-associated_protein_subunit_delta,XP_022082613.1 translocon-associated protein subunit delta-like isoform X2 [Acanthaster planci] (id=92.62%; len=149; e=1.16E-101)	1878	4	6.01	0.5676	0.003276	5	2	0	0	13	4	0	0	12	4	0	0	0.8572	0.872566	0.685011	0.935617	0.654864	0.98253	1.50036	4.38751e+06	4.34758e+06	3.31868e+06	4.73478e+06	3.12081e+06	5.05665e+06	0.894941	0.0159762	3
PMI_003902,m.13417,PMI_027805	None,18880,None	XP_022088715.1 tumor protein D52-like isoform X2 [Acanthaster planci] (id=79.26%; len=299; e=2.16E-163) ,XP_022088718.1 tumor protein D54-like isoform X4 [Acanthaster planci] (id=82.05%; len=234; e=7.81E-135) ,XP_022088715.1 tumor protein D52-like isoform X2 [Acanthaster planci] (id=79.60%; len=299; e=3.38E-165)	187	10	6.603	0.6447	0.045912	16	8	0	3	24	11	0	9	28	10	0	9	0.856432	0.976397	0.857575	0.892538	0.930928	0.994718	1.16147	6.28458e+06	7.15683e+06	6.28873e+06	6.54547e+06	6.82355e+06	7.29069e+06	0.894842	0.016006	3
PMI_002225		XP_020904785.1 peptidyl-prolyl cis-trans isomerase B [Exaiptasia pallida] (id=67.91%; len=187; e=6.78E-77)			6.571	0.6751	0.008534	34	12	1	10	40	10	1	1	46	11	1	1	0.951887	0.729994	0.919154	0.992045	0.738983	0.731882	1.35898	5.78275e+07	4.45068e+07	5.58291e+07	6.03858e+07	4.48686e+07	4.44579e+07	0.894305	0.0161667	3
m.27930	Pmi_658820_P	PPIB_CHICK_Peptidyl-prolyl_cis-trans_isomerase_B			6.571	0.6751	0.008534					37	10	1	1	44	11	1	1	0.955374	0.718815	0.931743	0.987696	0.688835	0.674104	1.4652	6.25621e+07	4.7356e+07	6.09787e+07	6.4909e+07	4.51045e+07	4.41783e+07	0.893741	0.0163365	2
m.30969	Pmi_668151_T	TDRD1_ORYLA_Tudor_domain-containing_protein_1			4.103	0.5545	0.1015	8	6	0	5	4	4	0	3	7	5	0	5	0.857482	0.88595	0.840883	0.91488	0.894498	1	1.18923	626774	647277	614409	668540	652991	730482	0.893363	0.016451	3
m.31100	Pmi_668542_I	IF4G1_HUMAN_Eukaryotic_translation_initiation_factor_4_gamma_1			5.272	0.6999	0.000909	57	40	3	14	65	44	6	17	71	48	4	17	0.939285	0.956861	0.925919	0.944565	0.951818	0.995294	1.07492	1.1265e+07	1.1478e+07	1.11035e+07	1.133e+07	1.14163e+07	1.19464e+07	0.893087	0.0165345	3
PMI_010760		XP_022100195.1 choline transporter-like protein 1 isoform X1 [Acanthaster planci] (id=88.43%; len=553; e=0.00E+00)			5.761	0.6493	0.000315	6	5	2	2	9	5	2	0	12	6	2	0	0.892083	0.880724	0.958384	0.993497	0.879653	0.930724	1.12942	1.76007e+06	1.72897e+06	1.8928e+06	1.96766e+06	1.73249e+06	1.83931e+06	0.892925	0.0165839	3
m.18560	Pmi_620492_E	EIF3I_HUMAN_Eukaryotic_translation_initiation_factor_3_s..CUT			6.54	0.6795	0.003351	20	13	3	8	34	16	3	9	30	18	4	10	0.903541	0.938004	0.939913	0.939573	0.980825	0.955227	1.08553	8.63622e+06	8.95948e+06	8.9743e+06	8.98316e+06	9.36146e+06	9.1121e+06	0.892895	0.0165929	3
PMI_006209		XP_022107145.1 CAD protein-like isoform X3 [Acanthaster planci] (id=88.87%; len=2012; e=0.00E+00)			5.854	0.6653	0.000884	110	62	1	0	159	76	1	0	164	84	2	0	0.984275	0.91419	0.999278	0.985809	0.931142	0.93239	1.09308	4.48152e+07	4.16269e+07	4.54916e+07	4.48829e+07	4.23903e+07	4.24536e+07	0.8925	0.0167133	3
m.34286	51457	XP_022080516.1 histamine N-methyltransferase-like [Acanthaster planci] (id=60.14%; len=291; e=3.66E-123)			2.784	0.3807	0.220654	1	1	1	0					1	1	1	0	0.673075	0.965254	0.904454	0.870323	1	0.831932	1.48572	21671.4	31094	29153	28000.8	32204.8	26806.2	0.892051	0.0168504	2
m.48108	71894	XP_022084679.1 nucleolar GTP-binding protein 1-like [Acanthaster planci] (id=89.78%; len=401; e=0.00E+00)			3.854	0.5052	0.247772	1	1	0	0	2	2	0	2	1	1	0	0	0.761515	0.968961	0.779835	0.945639	0.814937	0.925003	1.27241	35432	45239.8	36487.5	44057.6	37990.4	43199.6	0.891247	0.0170977	3
m.52440	78165	XP_022101302.1 uncharacterized protein LOC110984947 [Acanthaster planci] (id=62.95%; len=305; e=1.44E-140)			4.502	0.5552	0.001149	19	11	0	2	25	12	0	3	31	14	0	5	0.986025	0.911348	0.920016	0.996578	0.877909	0.907555	1.13517	1.40888e+07	1.30215e+07	1.31458e+07	1.42422e+07	1.25419e+07	1.2968e+07	0.891225	0.0171045	3
PMI_011160		XP_022107823.1 PRA1 family protein 3-like [Acanthaster planci] (id=87.64%; len=178; e=3.58E-113)			3.683	0.4055	0.554038					3	3	0	3	4	4	0	3	0.870083	0.780181	0.896775	1	0.783	0.788829	1.28175	279486	251234	288192	322010	250585	252774	0.891126	0.017135	2
m.30865	Pmi_667841_C	CPT1A_HUMAN_Carnitine_O-palmitoyltransferase_1,_liver_isoform			4.287	0.6157	0.008169	5	5	0	5	11	10	0	10	10	8	0	8	0.909147	0.963113	0.940705	0.984689	0.953648	0.951204	1.08309	665439	703880	688398	719268	697213	695568	0.891006	0.017172	3
PMI_014390		XP_022093567.1 ATP synthase subunit d, mitochondrial-like [Acanthaster planci] (id=85.62%; len=160; e=1.87E-89)			3.916	0.5892	0.00267	20	13	4	1	29	14	4	10	36	17	6	1	0.974455	0.999694	0.897665	0.910526	0.925553	0.980824	1.11366	1.13032e+07	1.15913e+07	1.04077e+07	1.05594e+07	1.07295e+07	1.13713e+07	0.890951	0.0171892	3
m.30922,m.50408,PMI_000385	Pmi_668120_C,75506,None	CD027_HUMAN_UPF0609_protein_C4orf27,XP_022084522.1 39S ribosomal protein L22, mitochondrial-like [Acanthaster planci] (id=68.17%; len=267; e=4.39E-125) ,XP_022084522.1 39S ribosomal protein L22, mitochondrial-like [Acanthaster planci] (id=68.17%; len=267; e=6.68E-125)	2302	3	3.999	0.4969	0.623937	1	1	0	0	2	2	0	0	2	2	0	0	0.776929	0.788046	0.901952	1	0.791735	0.823207	1.28712	235434	238037	272460	301459	239817	249281	0.890285	0.0173957	3
m.26821	Pmi_655201_E	ES1_MOUSE_ES1_protein_homolog,_mitochondrial			5.797	0.6735	0.024032	17	10	0	6	31	14	1	11	27	15	1	12	0.958661	0.952757	0.846357	0.854488	0.893507	0.925042	1.13269	6.24951e+06	6.18878e+06	5.48879e+06	5.54094e+06	5.79409e+06	6.01346e+06	0.889932	0.0175058	3
m.49276,m.49284	73722,73735	XP_022106704.1 serine/arginine-rich splicing factor 10-like isoform X1 [Acanthaster planci] (id=66.67%; len=96; e=6.87E-20) ,XP_022106705.1 serine/arginine-rich splicing factor 10-like isoform X2 [Acanthaster planci] (id=91.75%; len=97; e=3.11E-60)	513	1	2.94	0.3446	0.424889	1	1	0	0	1	1	0	0					0.890395	0.464069	0.550706	0.935122	0.642934	0.962515	2.07408	175775	91925.9	109510	184873	125970	192278	0.8899	0.0175156	2
m.33864,m.33863	50740,50739	XP_022091701.1 kinesin-like protein KIF20B isoform X2 [Acanthaster planci] (id=46.24%; len=173; e=3.70E-27) ,XP_022091701.1 kinesin-like protein KIF20B isoform X2 [Acanthaster planci] (id=45.53%; len=123; e=4.98E-14)	1603	1	4.502	0.5111	0.49326	2	2	0	1	2	2	0	1					0.786232	0.983806	0.999488	0.961512	0.837795	0.936704	1.27124	274937	344095	349581	336290	292996	327585	0.889684	0.0175833	2
m.50133	75024	PCJ40881.1 penicillin-binding protein 2 [SAR86 cluster bacterium] (id=51.85%; len=27; e=1.50E+00)			2.509	0.1769	2.0496					1	1	1	0	1	1	1	0	0.636904	1	0.727498	0.7455	0.928199	0.905052	1.5701	37565.1	58969.3	42875.1	43817.2	54820.8	53327.5	0.889612	0.0176057	2
PMI_009080		XP_022102219.1 rabankyrin-5-like [Acanthaster planci] (id=73.63%; len=1092; e=0.00E+00)			4.125	0.6465	0.057464	15	12	0	9	13	9	0	7	16	13	0	1	0.897	0.971128	0.976669	0.978677	0.901442	0.928682	1.09106	1.31355e+06	1.4278e+06	1.43764e+06	1.44059e+06	1.31953e+06	1.36244e+06	0.889584	0.0176144	3
m.22798	Pmi_640400_C	CH60_CHICK_60_kDa_heat_shock_protein,_mitochondrial			6.88	0.6814	0.005305	76	39	5	0	116	46	6	0	115	47	8	0	0.916526	0.985426	0.95148	0.926753	0.948877	0.992581	1.08298	4.2861e+07	4.60854e+07	4.44959e+07	4.33447e+07	4.43798e+07	4.64278e+07	0.889396	0.0176734	3
m.9956,PMI_019420	Pmi_554440_n,None	no_annot,XP_022097969.1 uncharacterized protein LOC110983210 isoform X2 [Acanthaster planci] (id=63.41%; len=686; e=0.00E+00)	1659	1	3.234	0.4107	0.800386	1	1	0	0	1	1	0	0					0.528253	0.692157	0.577446	1	0.720729	0.88549	1.89303	9479.82	12318.5	10520.4	17943	12717	15631.1	0.888893	0.0178314	2
m.15707,PMI_019943,m.32193	Pmi_603661_A,None,48175	AR6P1_PONAB_ADP-ribosylation_factor-like_protein_6-interac..CUT,XP_022093529.1 ADP-ribosylation factor-like protein 6-interacting protein 1 [Acanthaster planci] (id=77.83%; len=203; e=3.07E-109) ,XP_022093529.1 ADP-ribosylation factor-like protein 6-interacting protein 1 [Acanthaster planci] (id=77.34%; len=203; e=1.40E-108)	2395	3	4.12	0.4158	0.23126					2	2	0	0	3	3	0	0	0.733443	0.837968	0.836746	0.865566	1	0.91029	1.36343	127155	145112	144570	150692	173993	156965	0.888753	0.0178755	2
m.57104,m.14647	85464,Pmi_596310_P	XP_022101472.1 phosphatidylserine synthase 1-like [Acanthaster planci] (id=90.97%; len=299; e=0.00E+00) ,PTSS1_DANRE_Phosphatidylserine_synthase_1	2606	1	3.135	0.4147	0.040709	1	1	0	0					1	1	0	0	0.720714	0.949008	0.608577	0.564041	0.838385	1	1.77292	13200.9	17262.1	11216.7	10427.3	15370.9	18170.2	0.888422	0.0179799	2
PMI_022656		XP_022087424.1 uncharacterized protein LOC110977509 isoform X1 [Acanthaster planci] (id=63.98%; len=533; e=0.00E+00)			4.819	0.5864	0.145492	10	9	7	0	12	8	6	0	8	6	3	0	0.971893	0.89944	0.974332	0.93391	0.928079	0.918756	1.08327	2.05436e+06	1.8971e+06	2.05283e+06	1.96085e+06	1.94521e+06	1.93715e+06	0.887048	0.0184166	3
PMI_014142		XP_022085618.1 protein orai-2-like [Acanthaster planci] (id=72.25%; len=209; e=7.01E-94)			4.031	0.4681	0.158644	2	2	1	1	2	2	0	0	1	1	0	0	0.765904	0.87478	0.470462	0.665713	0.865473	0.733168	1.85941	90321.3	103005	55012.5	77611.5	102469	86131.1	0.885643	0.0188685	3
PMI_014803		XP_022098419.1 TPR and ankyrin repeat-containing protein 1-like [Acanthaster planci] (id=83.42%; len=1327; e=0.00E+00)			2.401	0.369	0.055492	1	1	0	0	3	3	0	2	4	4	1	3	0.833386	0.793918	0.848234	0.951773	0.769122	0.764797	1.24448	74859.8	71543.3	76758.5	86038.4	67144	67499.5	0.885212	0.0190083	3
PMI_023686,m.10540	None,Pmi_561200_A	XP_022083116.1 isoaspartyl peptidase/L-asparaginase-like isoform X2 [Acanthaster planci] (id=79.33%; len=237; e=5.87E-136) ,ASGL1_XENLA_L-asparaginase	1863	6	5.071	0.6183	0.048974	8	5	0	2	8	5	0	2	8	5	0	2	0.888344	0.925782	0.927151	0.993103	0.939908	0.979611	1.11793	1.9363e+06	2.01769e+06	2.01863e+06	2.16591e+06	2.04933e+06	2.13506e+06	0.884751	0.0191581	3
PMI_010581		XP_022101338.1 uncharacterized protein LOC110984974 isoform X4 [Acanthaster planci] (id=55.60%; len=491; e=0.00E+00)			5.678	0.6425	0.001149	23	15	1	6	46	23	4	7	44	22	3	7	0.980859	0.813726	0.880236	0.949197	0.805477	0.816078	1.21774	1.34036e+07	1.11037e+07	1.20264e+07	1.29653e+07	1.09915e+07	1.11307e+07	0.884719	0.0191685	3
m.20646,m.14682,m.20648	28087,Pmi_596720_O,28089	XP_022107139.1 D-aspartate oxidase-like isoform X3 [Acanthaster planci] (id=81.58%; len=342; e=0.00E+00) ,OXDD_BOVIN_D-aspartate_oxidase,XP_022107139.1 D-aspartate oxidase-like isoform X3 [Acanthaster planci] (id=80.99%; len=342; e=0.00E+00)	1542	6	4.448	0.5587	0.00765	2	2	0	1	5	4	0	3	6	4	0	2	0.78665	0.938442	0.907815	0.813399	0.901797	0.945344	1.20173	216936	263429	249185	223056	250887	258924	0.884293	0.0193077	3
PMI_019480		XP_022084320.1 uridine-cytidine kinase 2-like [Acanthaster planci] (id=90.51%; len=274; e=0.00E+00)			5.064	0.5223	0.141426	7	7	1	6	10	9	1	8	8	7	1	6	0.917518	0.936059	1	0.935862	0.939911	0.943589	1.0899	626380	637947	683300	637582	640636	642576	0.883793	0.0194713	3
m.22395	Pmi_638720_A	A9A1A_DANRE_Aldehyde_dehydrogenase_family_9_member_A1-A			7.219	0.7271	0.012659	23	13	0	11	21	13	0	10	25	13	0	10	0.918455	0.98863	0.943516	0.885907	0.990021	0.97202	1.11752	6.04031e+06	6.49121e+06	6.20528e+06	5.82168e+06	6.50128e+06	6.38857e+06	0.883732	0.0194913	3
PMI_021082		XP_022109971.1 protein FAM172A-like [Acanthaster planci] (id=58.36%; len=574; e=0.00E+00)			3.626	0.4865	0.03545	3	3	1	1	3	3	2	1	4	4	2	1	0.865409	0.668541	0.97557	0.880632	0.493616	0.5839	1.97638	358120	273848	396115	370169	209093	244541	0.883553	0.0195504	3
m.34482	51819	XP_022108182.1 nucleotide triphosphate diphosphatase NUDT15-like [Acanthaster planci] (id=81.94%; len=155; e=3.28E-92)			3.824	0.4376	0.104669	5	3	1	2	4	3	1	2	3	2	1	1	0.771803	0.825231	0.898814	1	0.783257	0.769439	1.29965	156195	166996	181813	202480	158567	155769	0.883076	0.0197077	3
PMI_021279		XP_022107064.1 4-trimethylaminobutyraldehyde dehydrogenase-like [Acanthaster planci] (id=86.52%; len=534; e=0.00E+00)			6.271	0.7111	0.012659	21	13	0	3	25	14	1	3	26	14	1	4	0.914933	0.977989	0.946737	0.887897	0.991894	0.979031	1.11713	5.74921e+06	6.14057e+06	5.95054e+06	5.57736e+06	6.22727e+06	6.14971e+06	0.883074	0.0197083	3
m.52050	77649	XP_022097947.1 neuroblast differentiation-associated protein AHNAK-like [Acanthaster planci] (id=64.46%; len=363; e=7.95E-92)			5.256	0.6343	0.006445	44	15	3	0	53	20	5	0	59	19	4	0	0.939742	0.92467	0.8836	0.871971	0.933722	1	1.14683	2.60095e+07	2.55629e+07	2.43952e+07	2.4086e+07	2.57669e+07	2.76371e+07	0.882847	0.0197833	3
m.52100,m.52074	77667,77660	XP_022097945.1 vesicle-associated protein-like, partial [Acanthaster planci] (id=71.09%; len=640; e=0.00E+00) ,XP_022097945.1 vesicle-associated protein-like, partial [Acanthaster planci] (id=71.09%; len=640; e=0.00E+00)	139	81	7.193	0.6711	0.001907	161	69	0	66	193	71	0	69	199	76	0	72	0.927031	0.979183	0.914809	0.926983	0.94802	0.98919	1.08131	7.34329e+07	7.75659e+07	7.24672e+07	7.34352e+07	7.51053e+07	7.83715e+07	0.882583	0.0198706	3
m.54760	81460	XP_022108090.1 cleavage and polyadenylation specificity factor subunit 1-like [Acanthaster planci] (id=92.31%; len=273; e=2.68E-177)			2.7	0.4008	0.092103	2	2	1	0	1	1	1	0	2	2	1	0	0.896677	0.524173	0.860949	0.968932	0.534977	0.558445	1.8485	499608	298829	482011	554307	299250	311065	0.882335	0.019953	3
m.49815	74604	XP_001367235.1 PREDICTED: ragulator complex protein LAMTOR2 isoform X1 [Monodelphis domestica] (id=76.80%; len=125; e=2.02E-66)			4.56	0.648	0.016182	4	3	1	2	12	6	1	4	9	5	1	4	0.949721	0.960653	0.962679	0.968442	0.907429	0.887365	1.09137	841029	849710	848602	853781	800816	782257	0.882292	0.0199673	3
m.58972	89567	OVA12592.1 hypothetical protein BVC80_9013g48 [Macleaya cordata] (id=57.14%; len=35; e=1.10E+00)			1.964	0.2597	0.013254					1	1	1	0	1	1	1	0	0.479802	1	0.654908	0.572464	0.763866	0.789715	2.08419	34365.8	71651.8	47938.3	41061.3	55277.5	56143	0.882284	0.0199699	2
m.19970	26817	XP_022094471.1 cystine/glutamate transporter-like [Acanthaster planci] (id=88.71%; len=496; e=0.00E+00)			2.794	0.405	0.000526	3	3	0	3	2	1	0	0	3	2	0	2	0.829049	0.791492	0.91203	1	0.895108	0.74743	1.33792	274220	257981	301092	327760	297959	242084	0.882213	0.0199935	3
PMI_009851		XP_022108977.1 charged multivesicular body protein 1b-like [Acanthaster planci] (id=93.00%; len=200; e=3.04E-117)			4.201	0.5295	0.451706	2	1	1	0	5	4	4	0	4	3	3	0	0.81033	0.990044	0.910222	0.912594	0.872073	0.944717	1.22178	531957	649877	598091	600291	570917	619663	0.882073	0.02004	3
PMI_021715		XP_022106311.1 uncharacterized protein YER152C-like [Acanthaster planci] (id=81.04%; len=385; e=0.00E+00)			6.103	0.6212	0.038872	17	10	1	4	30	13	1	7	23	14	1	7	0.956354	0.950505	0.952435	0.873279	0.994395	0.966527	1.13869	5.57587e+06	5.53793e+06	5.54783e+06	5.09697e+06	5.79839e+06	5.63512e+06	0.881617	0.0201921	3
m.27655,m.27654	40364,40363	XP_022102195.1 development-specific protein LVN1.2-like [Acanthaster planci] (id=64.84%; len=219; e=8.49E-100) ,XP_022102195.1 development-specific protein LVN1.2-like [Acanthaster planci] (id=65.75%; len=219; e=1.10E-100)	448	2	4.435	0.531	0.136895	5	2	0	1	4	2	0	1	7	2	0	1	0.927218	0.837432	0.969718	0.900518	0.817214	0.769156	1.26076	1.18054e+06	1.03509e+06	1.22685e+06	1.13491e+06	1.00027e+06	942675	0.880868	0.0204431	3
m.53042	79087	XP_022093324.1 elongation factor Tu, mitochondrial-like [Acanthaster planci] (id=93.85%; len=309; e=0.00E+00)			5.725	0.6252	0.0038	25	16	1	0	40	23	1	0					0.919392	1	0.926601	0.910947	0.959279	0.980848	1.09776	1.75992e+07	1.91235e+07	1.77292e+07	1.74259e+07	1.83393e+07	1.87562e+07	0.879898	0.0207704	2
PMI_021756		XP_022099584.1 mitochondrial import inner membrane translocase subunit tim16-B-like [Acanthaster planci] (id=76.30%; len=135; e=1.99E-63)			3.863	0.4954	0.096528	5	4	0	3	5	4	0	3					0.920014	0.986369	0.9761	0.937605	0.991984	0.939539	1.07823	530098	568395	562930	540434	572226	541577	0.879614	0.0208667	2
PMI_009722,PMI_017343		XP_022108981.1 NADH dehydrogenase [ubiquinone] 1 alpha subcomplex assembly factor 4-like [Acanthaster planci] (id=76.76%; len=142; e=4.72E-69) ,XP_022108981.1 NADH dehydrogenase [ubiquinone] 1 alpha subcomplex assembly factor 4-like [Acanthaster planci] (id=76.06%; len=142; e=8.95E-68)	2131	7	4.576	0.5599	0.171172	6	5	0	0	8	7	0	0	8	6	0	0	0.850958	0.970497	0.860985	0.918689	0.94871	0.984889	1.15739	334833	382262	338488	361582	373085	388088	0.87944	0.0209258	3
PMI_016539		XP_022102605.1 LOW QUALITY PROTEIN: prostamide/prostaglandin F synthase-like [Acanthaster planci] (id=73.66%; len=186; e=3.13E-79)			4.466	0.6505	0.099983	8	6	6	0	8	5	5	0	10	6	6	0	0.987177	0.95889	0.981672	0.945693	0.950375	0.96083	1.04387	3.11605e+06	3.02692e+06	3.10262e+06	2.99455e+06	2.99916e+06	3.02981e+06	0.87927	0.0209839	3
PMI_010582		XP_022101336.1 uncharacterized protein LOC110984974 isoform X2 [Acanthaster planci] (id=60.18%; len=565; e=0.00E+00)			5.124	0.5608	0.017556	13	9	2	3	24	13	3	4	21	12	3	3	0.986375	0.816923	0.876163	0.983977	0.818525	0.783215	1.25939	1.00316e+07	8.30015e+06	8.89978e+06	9.99957e+06	8.32259e+06	7.94766e+06	0.879121	0.0210346	3
m.21359	Pmi_634090_E	ENOA_ALLMI_Alpha-enolase			6.635	0.7279	0.00071	53	21	0	0	57	22	0	17	59	28	0	21	0.913618	0.976062	0.9453	0.91109	0.99048	0.995143	1.09226	1.80268e+07	1.92612e+07	1.8649e+07	1.79798e+07	1.95526e+07	1.96368e+07	0.878353	0.0212969	3
PMI_010978		XP_022091518.1 E3 ubiquitin-protein ligase MYCBP2-like [Acanthaster planci] (id=83.94%; len=2074; e=0.00E+00)			4.276	0.6637	0.090939	6	6	0	6	1	1	0	0	3	3	0	3	0.701104	0.66478	0.790278	0.664758	0.772423	1	1.50431	94111.2	84690.1	113301	86596.4	107059	153740	0.878164	0.0213616	3
m.15350	20765	XP_022092113.1 phosphoenolpyruvate carboxykinase, cytosolic [GTP]-like isoform X1 [Acanthaster planci] (id=89.02%; len=264; e=7.98E-176)			5.41	0.568	0.025323					16	10	0	0	14	9	0	0	0.960988	0.981142	0.915392	0.89386	1	0.956652	1.11874	6.34076e+06	6.47333e+06	6.03112e+06	5.8836e+06	6.60268e+06	6.31218e+06	0.878105	0.021382	2
m.36741	55375	WP_028877235.1 isochorismate synthase [Teredinibacter turnerae] (id=26.67%; len=105; e=3.30E+00)			4.274	0.5732	0.020534	66	10	8	0	127	12	10	0	119	13	10	0	0.932374	0.962672	0.927176	0.87041	0.997831	0.979021	1.14639	2.44502e+08	2.524e+08	2.43038e+08	2.28074e+08	2.61859e+08	2.56826e+08	0.877978	0.0214255	3
PMI_025434		XP_022111323.1 steroid 17-alpha-hydroxylase/17,20 lyase-like isoform X2 [Acanthaster planci] (id=82.69%; len=260; e=2.33E-156)			4.277	0.6046	0.060897	6	5	0	0	12	7	0	2	15	8	0	3	0.857242	0.939886	0.875415	0.895041	0.96762	1	1.16653	2.64403e+06	2.90224e+06	2.70144e+06	2.76121e+06	2.98703e+06	3.08706e+06	0.877254	0.0216752	3
PMI_013258		XP_022092838.1 uncharacterized protein LOC110980454 isoform X2 [Acanthaster planci] (id=42.22%; len=945; e=0.00E+00)			1.727	0.1778	0.887434	1	1	1	0					1	1	1	0	0.581727	0.985942	0.608741	0.509931	0.857945	0.940209	1.93348	606375	1.0544e+06	626544	537232	916338	994877	0.877045	0.0217474	2
PMI_005347,m.24535,m.26858	None,Pmi_647150_T,39060	XP_022089439.1 tRNA (guanine(26)-N(2))-dimethyltransferase-like isoform X1 [Acanthaster planci] (id=77.20%; len=601; e=0.00E+00) ,TRM1_HUMAN_tRNA_(guanine(26)-N(2))-dimethyltransferase,XP_022089439.1 tRNA (guanine(26)-N(2))-dimethyltransferase-like isoform X1 [Acanthaster planci] (id=79.53%; len=601; e=0.00E+00)	1657	7	4.881	0.6467	0.003822	5	5	0	5	1	1	0	0	2	2	0	0	0.748219	0.871345	0.944793	0.808445	0.957394	0.883964	1.27956	115323	127306	136208	120577	137425	132826	0.877011	0.0217593	3
m.18629	Pmi_620840_A	AT5F1_PONAB_ATP_synthase_subunit_b,_mitochondrial			4.831	0.6182	0.00541	21	16	16	0	36	18	18	0	36	19	19	0	0.988248	0.859519	0.920047	0.950919	0.849108	0.845488	1.16885	9.51023e+06	8.26834e+06	8.85426e+06	9.13516e+06	8.16789e+06	8.1308e+06	0.876615	0.0218965	3
m.11179	Pmi_568000_R	RRAGA_HUMAN_Ras-related_GTP-binding_protein_A			3.909	0.4541	0.112842	9	8	1	7	11	10	0	0	13	9	1	7	0.923401	0.904494	0.977425	1	0.916024	0.919617	1.10559	1.10932e+06	1.08678e+06	1.17441e+06	1.2017e+06	1.10039e+06	1.10511e+06	0.876142	0.0220612	3
m.18049	Pmi_617720_Q	QCR2_HUMAN_Cytochrome_b-c1_complex_subunit_2,_mitochondrial			6.122	0.6686	0.005606	33	19	1	17	50	24	1	0	51	23	1	17	0.916342	0.929501	0.922554	0.88778	1	0.903566	1.12641	6.62424e+06	6.72091e+06	6.672e+06	6.41966e+06	7.22994e+06	6.53619e+06	0.876076	0.0220843	3
m.49316,m.28345	73759,Pmi_660270_Z	XP_022108526.1 zinc finger HIT domain-containing protein 2-like isoform X1 [Acanthaster planci] (id=70.17%; len=486; e=0.00E+00) ,ZNHI2_BOVIN_Zinc_finger_HIT_domain-containing_protein_2	895	6	4.645	0.5567	0.008972	5	4	0	3	5	4	0	2	5	4	0	2	0.831992	0.936317	0.914857	0.932552	0.93657	0.995205	1.19617	347384	391151	381610	388701	390874	415004	0.875816	0.0221751	3
m.30523,m.38555	Pmi_666051_L,58211	LPHN3_HUMAN_Latrophilin-3,XP_022097108.1 adhesion G protein-coupled receptor L2-like isoform X7 [Acanthaster planci] (id=70.55%; len=995; e=0.00E+00)	723	4	4.395	0.5333	0.068827	3	3	0	3	2	2	0	2	2	2	0	2	0.902124	0.941178	0.918713	0.959159	0.959594	0.995997	1.10406	133965	139885	136875	142812	142939	148042	0.875674	0.0222245	3
m.29652	44062	XP_022099260.1 estrogen sulfotransferase-like [Acanthaster planci] (id=67.59%; len=290; e=4.50E-145)			4.825	0.5334	0.08084	6	6	0	6	11	8	0	6	9	8	0	5	0.890467	0.986331	0.92176	0.934348	0.93517	0.939501	1.10766	1.19605e+06	1.32486e+06	1.23747e+06	1.25476e+06	1.25264e+06	1.25825e+06	0.875248	0.0223737	3
m.22654	31605	XP_022092459.1 putative RNA-binding protein Luc7-like 2 isoform X1 [Acanthaster planci] (id=94.92%; len=256; e=1.14E-165)			4.16	0.5041	0.008939	4	3	0	3	3	3	0	3	4	4	0	4	0.969028	0.923794	0.905325	0.932073	0.929136	0.967454	1.07036	590839	562445	552008	568105	566207	590014	0.87506	0.0224399	3
m.14680	Pmi_596650_N	NPT2A_RAT_Sodium-dependent_phosphate_transport_protein_2A			4.797	0.5143	0.05717	6	5	2	3	6	4	1	3	2	2	0	0	0.931964	0.955805	0.895151	0.909021	0.940542	0.989505	1.10541	1.51534e+06	1.55496e+06	1.45219e+06	1.47524e+06	1.52899e+06	1.61395e+06	0.874388	0.0226767	3
m.12488,PMI_022382	Pmi_579470_S,None	SUDX_DROME_E3_ubiquitin-protein_ligase_Su(dx),XP_022106630.1 E3 ubiquitin-protein ligase Su(dx)-like [Acanthaster planci] (id=88.09%; len=168; e=1.20E-91)	732	1	2.805	0.3376	0.541366	1	1	0	0					1	1	0	0	0.719255	0.784201	0.86522	0.988959	0.970939	0.954124	1.37498	29518	32182.3	35500	40609	39890.8	39199.4	0.874003	0.0228127	2
PMI_004394		XP_022101083.1 set1/Ash2 histone methyltransferase complex subunit ASH2-like isoform X1 [Acanthaster planci] (id=90.03%; len=632; e=0.00E+00)			4.455	0.5179	0.136956	7	6	1	5	5	5	1	4	5	5	1	4	0.857647	0.918345	0.916364	0.903595	0.893526	0.967236	1.12778	279074	298993	298520	294343	290241	314666	0.873665	0.0229326	3
PMI_013914		XP_022107029.1 elongation factor-like GTPase 1 [Acanthaster planci] (id=73.59%; len=390; e=0.00E+00)			3.12	0.4615	0.172166	2	2	0	0					2	2	1	0	0.779951	0.879392	0.982951	0.961985	0.826098	0.981511	1.26027	47107.7	53284.9	60161.5	58775.8	50230.6	59833.2	0.873039	0.0231555	2
m.32866	Pmi_3440590_	ST1C1_RAT_Sulfotransferase_1C1			3.683	0.6102	0.150281	3	3	1	1	5	4	1	2	6	5	1	2	0.917208	0.7665	0.931568	1	0.820407	0.75124	1.33113	360865	301546	366521	393529	322671	295493	0.872636	0.0232995	3
m.11286,PMI_000371	Pmi_568920_R,None	RS23_DERVA_40S_ribosomal_protein_S23,XP_011679331.1 PREDICTED: 40S ribosomal protein S23, partial [Strongylocentrotus purpuratus] (id=93.06%; len=144; e=2.22E-92)	127	7	5.331	0.671	0.018233	30	6	0	5	44	7	0	6	38	7	0	6	0.908882	0.981763	0.887303	0.884233	0.982781	0.9849	1.11385	4.89643e+07	5.28807e+07	4.78018e+07	4.76478e+07	5.29584e+07	5.30786e+07	0.872463	0.0233612	3
PMI_006159		XP_022105705.1 peptidyl-prolyl cis-trans isomerase FKBP4-like [Acanthaster planci] (id=77.16%; len=464; e=0.00E+00)			5.437	0.6985	0.003109	54	28	2	22	89	33	1	26	93	33	2	25	0.898671	0.977189	0.914628	0.882575	0.98927	0.985993	1.12089	2.09252e+07	2.2754e+07	2.12927e+07	2.05515e+07	2.30355e+07	2.29622e+07	0.872245	0.0234395	3
m.6876,PMI_025709,PMI_017832	Pmi_512550_C,None,None	CTDSL_CHICK_CTD_small_phosphatase-like_protein,XP_022111308.1 CTD small phosphatase-like protein isoform X1 [Acanthaster planci] (id=95.97%; len=248; e=7.55E-176) ,XP_022111316.1 CTD small phosphatase-like protein isoform X2 [Acanthaster planci] (id=96.97%; len=231; e=4.08E-165)	1139	2	3.135	0.3649	0.2155	1	1	0	0	1	1	0	0	1	1	0	0	0.700059	0.753184	0.909988	0.895857	0.854763	0.923923	1.31978	27346.8	30178.9	36979.1	36735.5	35171.9	38683.2	0.872126	0.0234822	3
PMI_010553		XP_022089823.1 peptidyl-prolyl cis-trans isomerase-like 6 [Acanthaster planci] (id=78.78%; len=344; e=0.00E+00)			3.999	0.5088	0.108854					12	6	1	3	10	5	1	2	0.992137	1	0.965295	0.890787	0.873033	0.92635	1.14543	1.05511e+07	1.06352e+07	1.02667e+07	9.47215e+06	9.28631e+06	9.85601e+06	0.871984	0.023533	2
m.39203	59260	XP_022087871.1 protein HGV2-like isoform X2 [Acanthaster planci] (id=70.91%; len=526; e=0.00E+00)			5.937	0.6876	0.002746	94	27	0	3	147	34	0	0	147	37	0	0	0.886877	0.962147	0.925199	0.896417	0.961537	1	1.12755	6.75989e+07	7.33284e+07	7.0503e+07	6.83077e+07	7.32769e+07	7.61597e+07	0.871635	0.0236586	3
m.36896	55540	XP_022098151.1 sestrin-1-like isoform X1 [Acanthaster planci] (id=91.23%; len=456; e=0.00E+00)			3.483	0.5472	0.004054	6	6	0	6	7	6	0	6	4	3	0	3	0.814361	0.935172	0.87327	0.918784	0.932785	0.965543	1.18564	248882	284067	265858	278406	280953	294576	0.871601	0.023671	3
m.9867	Pmi_553400_A	ARF4_XENLA_ADP-ribosylation_factor_4			5.465	0.5808	0.012597	16	7	2	4	21	9	2	4	25	11	4	4	0.925995	0.950561	0.935038	0.979819	0.928318	0.953	1.05813	5.22112e+06	5.321e+06	5.24768e+06	5.5258e+06	5.2141e+06	5.3344e+06	0.87143	0.0237327	3
m.19980,m.29187	Pmi_627610_M,43284	MFSD1_BOVIN_Major_facilitator_superfamily_domain-containin..CUT,XP_022086174.1 major facilitator superfamily domain-containing protein 1-like isoform X2 [Acanthaster planci] (id=81.61%; len=484; e=0.00E+00)	1981	1	3.473	0.4547	0.611925	2	1	0	0					1	1	0	0	0.842432	0.932926	0.982994	0.640625	0.796535	0.622139	1.58002	25947.3	28736.9	30204.3	19782.4	24492.3	19241.4	0.871368	0.0237551	2
m.13082	Pmi_584800_1	14337_SOLLC_14-3-3_protein_7			6.282	0.7152	0.001186	86	24	13	9	115	31	17	11	126	31	18	11	0.98705	0.867328	0.989331	0.986848	0.904307	0.90591	1.14067	4.39236e+07	3.8579e+07	4.40408e+07	4.391e+07	4.02744e+07	4.03694e+07	0.870941	0.0239097	3
PMI_015407,m.38237	None,57805	XP_022108078.1 ubiquitin-conjugating enzyme E2 K-like [Acanthaster planci] (id=87.00%; len=200; e=2.44E-122) ,XP_022108078.1 ubiquitin-conjugating enzyme E2 K-like [Acanthaster planci] (id=87.00%; len=200; e=2.41E-121)	2603	7	3.736	0.5679	0.075692	10	7	0	6	7	6	0	4	9	7	0	5	0.865484	0.886871	0.928093	0.738769	0.989236	0.877623	1.33903	962707	986752	1.03218e+06	821457	1.1002e+06	975686	0.870834	0.0239482	3
m.23850	33674	XP_022082129.1 uncharacterized protein LOC110974636 [Acanthaster planci] (id=78.78%; len=410; e=0.00E+00)			4.632	0.6079	0.028757	7	7	0	7	5	4	0	2					0.958351	0.890731	0.973943	0.875314	1	0.909831	1.14245	390763	362612	396738	356287	407042	369939	0.8708	0.0239607	2
m.27235,m.18814	Pmi_656740_G,24858	GGH_RAT_Gamma-glutamyl_hydrolase,XP_022092688.1 gamma-glutamyl hydrolase-like [Acanthaster planci] (id=73.23%; len=310; e=1.64E-163)	2651	5	5.434	0.6194	0.027101	4	4	0	3	5	4	0	3	6	5	0	4	0.922258	0.801738	0.910209	0.891468	0.997729	0.925296	1.24446	926515	808789	914385	898369	1.00214e+06	932924	0.870798	0.0239612	3
m.57336	85843	YP_492667.1 NADH dehydrogenase subunit 1 (mitochondrion) [Acanthaster brevispinus] (id=80.52%; len=154; e=3.08E-80)			5.175	0.5775	0.486499	1	1	1	0	3	1	1	0	3	1	1	0	0.925181	0.993466	0.83732	0.825214	0.855279	0.96208	1.20389	493413	529320	445344	438621	454069	510747	0.870497	0.0240704	3
PMI_011212		XP_022088554.1 costars family protein v1g158749-like [Acanthaster planci] (id=89.16%; len=83; e=1.69E-47)			4.602	0.6451	0.011354	6	2	2	0	12	4	4	0	8	5	5	0	0.772925	0.967516	0.963485	0.935414	0.921616	0.989107	1.27969	2.12633e+06	2.65717e+06	2.64351e+06	2.56892e+06	2.52742e+06	2.71678e+06	0.869267	0.0245194	3
m.41651,m.41647,m.41639,m.30606,m.41649,PMI_012470,m.41642	62975,62973,62969,Pmi_667300_C,62974,None,62971	XP_022103025.1 centlein-like isoform X1 [Acanthaster planci] (id=81.97%; len=1109; e=0.00E+00) ,XP_022103025.1 centlein-like isoform X1 [Acanthaster planci] (id=82.75%; len=1281; e=0.00E+00) ,XP_022103025.1 centlein-like isoform X1 [Acanthaster planci] (id=81.68%; len=868; e=0.00E+00) ,CNTLN_MOUSE_Centlein,XP_022103025.1 centlein-like isoform X1 [Acanthaster planci] (id=81.79%; len=1115; e=0.00E+…	1502	2	2.485	0.3264	0.084951	2	2	0	0					1	1	0	0	0.366598	1	0.524788	0.400378	0.837588	0.782198	2.72778	229608	627429	327375	251466	529319	492061	0.868963	0.0246312	2
PMI_000878,m.11314	None,Pmi_569190_R	XP_022080471.1 60S ribosomal protein L14-like [Acanthaster planci] (id=90.70%; len=129; e=2.09E-72) ,RL14_RAT_60S_ribosomal_protein_L14	142	13	3.88	0.5595	0.022875	16	8	0	4	23	13	0	8	26	12	0	8	1	0.837269	0.940899	0.927072	0.900536	0.864848	1.19436	1.2495e+07	1.04677e+07	1.17565e+07	1.15907e+07	1.12554e+07	1.08114e+07	0.868897	0.0246554	3
PMI_013608		XP_022102070.1 arylacetamide deacetylase-like 3 [Acanthaster planci] (id=66.07%; len=389; e=0.00E+00)			4.575	0.7113	0.014341	2	2	0	1	6	3	0	1	3	2	0	1	0.943617	0.664024	0.859517	0.97913	0.673419	0.733788	1.47454	1.72554e+06	1.21323e+06	1.56866e+06	1.79972e+06	1.2299e+06	1.33121e+06	0.868722	0.0247196	3
PMI_021057,PMI_007743,m.33040	None,None,49435	XP_021482625.1 cytochrome c oxidase subunit 7C, mitochondrial [Meriones unguiculatus] (id=75.44%; len=57; e=9.80E-24) ,XP_021482625.1 cytochrome c oxidase subunit 7C, mitochondrial [Meriones unguiculatus] (id=75.44%; len=57; e=1.01E-23) ,XP_021482625.1 cytochrome c oxidase subunit 7C, mitochondrial [Meriones unguiculatus] (id=75.44%; len=57; e=5.00E-23)	2004	3	4.535	0.5617	0.022774					4	3	0	0	4	3	0	0	0.726423	0.931721	0.664159	0.679624	1	0.905687	1.50566	755663	964254	692272	705520	1.03739e+06	940604	0.86849	0.024805	2
m.31610	Pmi_669812_T	T2AG_ONCMY_Transcription_initiation_factor_IIA_subunit_2			3.046	0.2811	0.194282	1	1	1	0	1	1	0	0	4	2	1	1	0.970635	0.90352	0.826441	0.8136	0.973901	0.85749	1.19703	101462	94695.4	86214.8	84786.1	101628	89347.5	0.868233	0.0248998	3
PMI_006597,m.11759	None,Pmi_573710_F	XP_022084923.1 F-box/LRR-repeat protein 20-like [Acanthaster planci] (id=70.51%; len=434; e=0.00E+00) ,FXL20_HUMAN_F-box/LRR-repeat_protein_20	787	3	2.752	0.4382	0.020879	4	3	0	0	1	1	0	0	1	1	0	0	0.83989	0.882725	0.860413	0.863389	0.934152	1	1.19063	264476	279067	271962	272522	296413	317143	0.868213	0.0249073	3
PMI_023770		XP_022097964.1 leucine-rich repeat-containing protein 57-like [Acanthaster planci] (id=83.03%; len=165; e=7.46E-94)			3.029	0.4658	0.075704	2	2	2	0	2	2	2	0	3	3	3	0	0.876495	0.831824	0.971119	0.972977	0.818756	0.852381	1.18836	209411	199259	234399	234324	197105	204975	0.868162	0.024926	3
m.46516,m.22185	69656,Pmi_637610_S	XP_022102984.1 sorting nexin-2-like [Acanthaster planci] (id=84.01%; len=544; e=0.00E+00) ,SNX2_HUMAN_Sorting_nexin-2	2086	35	4.814	0.5865	0.006646	38	20	0	2	73	33	0	28	78	37	0	30	0.918416	0.975433	0.951922	0.921374	0.997879	0.99707	1.08652	1.61141e+07	1.71075e+07	1.67054e+07	1.61655e+07	1.75096e+07	1.74932e+07	0.86788	0.0250305	3
PMI_028714		XP_022094891.1 60S ribosomal protein L35-like [Acanthaster planci] (id=93.50%; len=123; e=7.89E-73)			3.84	0.4478	0.044285	10	6	6	0	16	7	7	0	11	7	7	0	0.937763	0.946683	0.864136	0.830044	0.967845	0.926567	1.16602	1.48424e+07	1.49416e+07	1.36231e+07	1.30848e+07	1.53189e+07	1.45875e+07	0.86785	0.0250414	3
m.21582,m.33898	Pmi_634934_n,50791	no_annot,XP_022093404.1 uncharacterized protein LOC110980762 [Acanthaster planci] (id=79.42%; len=486; e=0.00E+00)	1749	1	2.521	0.3824	1.64328					1	1	0	0	1	1	0	0	0.497316	0.892414	0.834874	0.659578	0.911452	0.985953	1.98255	18675.4	33668.1	31421.6	24811.5	34338.2	37105.6	0.867649	0.0251161	2
PMI_000450		XP_022107146.1 CAD protein-like isoform X4 [Acanthaster planci] (id=88.23%; len=1759; e=0.00E+00)			5.854	0.6653	0.000884	96	54	0	0	146	70	0	38	151	74	0	0	0.980425	0.920385	1	0.979061	0.939655	0.937965	1.0865	4.17268e+07	3.91786e+07	4.25557e+07	4.16697e+07	3.99865e+07	3.99234e+07	0.867354	0.0252256	3
m.33512	50099	XP_022103940.1 ubiquitin-like protein 4A-B [Acanthaster planci] (id=90.39%; len=156; e=6.45E-100)			4.776	0.6117	0.045556	7	5	0	5	4	3	0	3	3	3	0	3	0.825072	0.841992	0.828306	0.9373	0.893178	1	1.21202	370009	376828	371144	419466	399762	447976	0.867046	0.0253402	3
PMI_015320,m.19558	None,Pmi_625560_I	XP_022107600.1 importin subunit alpha-7-like isoform X1 [Acanthaster planci] (id=93.18%; len=528; e=0.00E+00) ,IMA7_MOUSE_Importin_subunit_alpha-7	1051	24	5.418	0.5924	0.014383	21	14	0	12	34	22	0	18	30	21	0	18	0.880277	0.93895	0.934948	0.961692	0.927562	0.966041	1.09743	3.27704e+06	3.49744e+06	3.48411e+06	3.58496e+06	3.45124e+06	3.59457e+06	0.867027	0.0253471	3
m.18155	Pmi_618330_P	PPIL6_HUMAN_Peptidyl-prolyl_cis-trans_isomerase-like_6			3.687	0.5088	0.108854					12	6	1	3	10	5	1	2	0.992373	1	0.966171	0.891876	0.872398	0.925157	1.14627	1.05312e+07	1.06125e+07	1.02542e+07	9.46358e+06	9.25983e+06	9.82242e+06	0.866981	0.0253641	2
m.39908	60369	XP_022100992.1 spliceosome RNA helicase DDX39B-like [Acanthaster planci] (id=97.24%; len=435; e=0.00E+00)			4.359	0.6099	0.026119	11	8	0	8	13	9	0	9	11	9	0	9	0.892858	0.895357	0.935978	0.90027	0.934761	1	1.12	3.68317e+06	3.68987e+06	3.86114e+06	3.71238e+06	3.85601e+06	4.12385e+06	0.866845	0.0254151	3
m.22522	Pmi_639030_n	no_annot			5.572	0.6618	0.003172	38	20	1	6	71	24	1	4	73	28	1	6	0.964173	0.977369	0.897157	0.876495	0.960546	0.961579	1.11509	2.17249e+07	2.20012e+07	2.01965e+07	1.97352e+07	2.16042e+07	2.16351e+07	0.86629	0.0256222	3
PMI_007821		XP_022100361.1 myotubularin-related protein 2-like [Acanthaster planci] (id=90.74%; len=659; e=0.00E+00)			3.213	0.3903	0.18384	1	1	1	0	2	2	0	1	2	2	0	1	0.764633	0.811643	0.73823	0.757726	0.942371	0.858903	1.27653	32785.5	34137.6	30557.5	30682	42542.5	36908	0.866213	0.025651	3
m.48941	73119	XP_022105296.1 circularly permutated Ras protein 1-like [Acanthaster planci] (id=84.38%; len=128; e=7.12E-67)			4.174	0.5238	0.139418	2	2	1	0	1	1	1	0					0.42177	0.94506	0.883485	0.635949	0.899497	0.985258	2.33601	10004.4	21679.3	19657.1	14832.2	20594.3	22572.8	0.86577	0.0258171	2
m.23004,PMI_008379,m.21191	Pmi_641250_G,None,29119	GPAT4_MOUSE_Glycerol-3-phosphate_acyltransferase_4,XP_022080703.1 glycerol-3-phosphate acyltransferase 4-like [Acanthaster planci] (id=80.51%; len=472; e=0.00E+00) ,XP_022080703.1 glycerol-3-phosphate acyltransferase 4-like [Acanthaster planci] (id=84.32%; len=472; e=0.00E+00)	2555	6	3.172	0.5556	0.000188	2	2	0	1	4	4	0	3	4	4	0	3	0.848511	0.941095	0.894083	0.9678	0.896622	1	1.17853	209391	232345	220650	238981	221205	246777	0.865123	0.0260611	3
PMI_001003		XP_022110427.1 ATP-binding cassette sub-family B member 8, mitochondrial-like isoform X2 [Acanthaster planci] (id=82.57%; len=700; e=0.00E+00)			4.172	0.6023	0.053252	3	3	0	3	4	4	0	4	3	3	0	3	0.753749	0.89688	0.808353	0.996309	0.944134	0.83257	1.32181	113264	133165	120833	148272	140488	124481	0.86472	0.026213	3
m.31408	Pmi_669290_A	APLP_LOCMI_Apolipophorins			7.607	0.711	0.011167	148	65	8	21	203	79	10	2	222	77	10	2	0.990551	0.969953	0.987412	0.999049	0.959892	0.983142	1.04079	5.5974e+07	5.47765e+07	5.58088e+07	5.64661e+07	5.42067e+07	5.55368e+07	0.864709	0.0262174	3
m.26159,m.40375	Pmi_653111_T,60941	TACC3_XENLA_Transforming_acidic_coiled-coil-containing_pr..CUT,XP_022091717.1 transforming acidic coiled-coil-containing protein 3-like isoform X7 [Acanthaster planci] (id=74.87%; len=951; e=0.00E+00)	272	25	5.729	0.6528	0.057992	25	19	0	6	20	16	0	6	17	14	0	4	0.947326	0.962155	0.878514	0.908961	0.971549	0.981216	1.11691	1.95585e+06	1.99305e+06	1.82172e+06	1.88531e+06	2.0138e+06	2.03356e+06	0.864434	0.0263214	3
m.21965	Pmi_636700_P	PELP1_XENLA_Proline-,_glutamic_acid-_and_leucine-rich_protein_1			3.948	0.5476	0.083846	8	8	2	6	8	8	1	7	9	8	1	7	0.962189	0.957417	0.928058	0.916115	0.954368	0.958622	1.05029	788942	783699	760149	750457	781160	785971	0.864096	0.0264498	3
m.26075	Pmi_652477_T	T22D1_RAT_TSC22_domain_family_protein_1			2.918	0.4922	0.255004	1	1	1	0	2	2	2	0	1	1	1	0	0.739913	0.915525	0.675598	0.936078	0.825971	0.952838	1.41036	54691	68031.7	46557.9	72422.2	61552.2	71620.4	0.863632	0.0266264	3
m.24440	Pmi_646801_N	NP1L1_XENTR_Nucleosome_assembly_protein_1-like_1			5.906	0.6678	0.001639	16	8	0	8	27	13	0	7	29	10	0	5	0.89532	0.941888	0.969529	0.902747	0.978887	0.96804	1.09334	7.95933e+06	8.37836e+06	8.63041e+06	8.05059e+06	8.70722e+06	8.62512e+06	0.863492	0.0266799	3
m.13976	Pmi_591600_G	GLCM_MOUSE_Glucosylceramidase			5.336	0.6608	0.028339	9	8	0	8	9	7	0	4	8	6	0	6	0.856305	0.959749	0.973351	0.954521	0.932846	0.958334	1.13669	1.5411e+06	1.72566e+06	1.74886e+06	1.71563e+06	1.67646e+06	1.72363e+06	0.86343	0.0267032	3
PMI_002874		XP_022103742.1 eukaryotic translation initiation factor 4H-like isoform X2 [Acanthaster planci] (id=68.90%; len=299; e=3.03E-96)			4.338	0.5979	0.006663	17	11	2	9	25	14	2	11	29	15	2	12	0.83644	0.947356	0.852524	0.880208	0.887203	1	1.19554	5.1089e+06	5.78531e+06	5.21164e+06	5.37948e+06	5.4227e+06	6.10977e+06	0.863124	0.0268205	3
PMI_023316		XP_022082168.1 insulin-like growth factor 2 mRNA-binding protein 3 isoform X2 [Acanthaster planci] (id=76.81%; len=457; e=0.00E+00)			7.047	0.7264	0.002281	72	22	2	0	124	31	2	0	125	30	2	0	0.968018	0.982113	0.946555	0.943002	0.984975	0.992768	1.05277	4.90125e+07	4.97454e+07	4.79374e+07	4.77256e+07	4.98654e+07	5.02649e+07	0.86217	0.0271866	3
m.18272	Pmi_618920_C	CSN4_MOUSE_COP9_signalosome_complex_subunit_4			5.248	0.5771	0.012625	11	7	1	6	13	10	2	8	14	10	3	7	0.963356	0.978463	0.967207	0.97356	0.978278	0.966191	1.01568	1.48769e+06	1.51119e+06	1.49367e+06	1.50431e+06	1.51096e+06	1.4921e+06	0.862105	0.0272113	3
m.52322,PMI_003728	78018,None	XP_022091494.1 40S ribosomal protein S3a-like [Acanthaster planci] (id=97.38%; len=267; e=0.00E+00) ,XP_022091494.1 40S ribosomal protein S3a-like [Acanthaster planci] (id=97.38%; len=267; e=0.00E+00)	1270	29	5.107	0.6926	0.018925	60	24	0	17	75	29	0	19	72	28	0	20	0.996956	0.944407	0.978352	0.988956	0.929486	0.947029	1.07259	5.02164e+07	4.75529e+07	4.92646e+07	4.98012e+07	4.68257e+07	4.76848e+07	0.862038	0.0272375	3
m.25171	36165	XP_022105084.1 probable ATP-dependent RNA helicase DDX17 isoform X2 [Acanthaster planci] (id=88.30%; len=513; e=0.00E+00)			3.605	0.6205	0.046193	4	3	0	2	12	10	0	9	12	11	0	11	0.677713	0.743889	0.767478	0.819065	0.83722	1	1.47555	368806	403471	415890	444634	453214	543060	0.861948	0.027272	3
PMI_005565		XP_022110175.1 uncharacterized protein LOC110989830 [Acanthaster planci] (id=70.92%; len=1919; e=0.00E+00)			3.427	0.4829	0.171484	1	1	0	0	3	3	0	2	3	3	0	3	0.760534	0.797056	0.843177	0.902804	0.741582	0.868538	1.2174	127431	130976	140079	152805	123200	142325	0.861627	0.027396	3
PMI_003951,PMI_003952		XP_022079081.1 uncharacterized protein LOC110973022 [Acanthaster planci] (id=73.05%; len=809; e=0.00E+00) ,XP_022079081.1 uncharacterized protein LOC110973022 [Acanthaster planci] (id=57.47%; len=663; e=0.00E+00)	1808	5	3.352	0.5166	0.039777	2	2	0	2	3	3	0	3	3	2	0	2	0.711526	0.77524	0.769157	0.738781	0.71211	0.7394	1.08955	118113	128036	126863	120397	120190	123618	0.861396	0.0274854	3
m.30549	Pmi_667060_B	BXL2_ARATH_Probable_beta-D-xylosidase_2			4.48	0.6654	0.096482	7	5	0	5	5	3	0	3	7	7	0	7	0.888602	0.920176	0.944164	0.980333	0.856421	0.910056	1.14469	488807	507169	520250	541086	471601	500668	0.861355	0.027501	3
m.16205	Pmi_606862_A	ARBK2_HUMAN_Beta-adrenergic_receptor_kinase_2			3.767	0.4818	0.001615	7	7	1	6	4	3	1	2	7	7	1	6	0.872807	0.862169	0.946703	0.949015	0.846603	0.882895	1.12097	622057	608842	677998	678032	595444	624901	0.861251	0.0275412	3
PMI_018932		XP_022109893.1 erythrocyte band 7 integral membrane protein-like [Acanthaster planci] (id=93.07%; len=231; e=1.45E-142)			4.5	0.6514	0.014237	24	9	0	8	25	8	0	7	25	10	0	9	0.99308	0.845158	0.963831	0.941355	0.848747	0.866869	1.17502	4.66717e+06	3.96014e+06	4.52868e+06	4.42317e+06	3.983e+06	4.06483e+06	0.860902	0.0276767	3
m.54309	80774	XP_022109180.1 elongation factor 1-beta-like [Acanthaster planci] (id=80.95%; len=231; e=2.52E-109)			5.012	0.6292	0.030632	36	15	0	13	81	20	0	10	84	19	0	9	0.866323	0.96617	0.906931	0.88407	0.941083	1	1.1543	2.33197e+07	2.60248e+07	2.44234e+07	2.38115e+07	2.53571e+07	2.69538e+07	0.860743	0.0277386	3
m.13667	Pmi_589210_P	PP1B_PIG_Serine/threonine-protein_phosphatase_PP1-beta_c..CUT			4.527	0.6375	0.047488	13	8	0	8	16	9	0	9	15	7	0	7	0.975222	0.868878	0.990991	0.986491	0.919122	0.953239	1.14054	2.95449e+06	2.63338e+06	2.99451e+06	2.98664e+06	2.7796e+06	2.88697e+06	0.860176	0.0279594	3
m.30501,PMI_003066	Pmi_666962_U,None	UB2G1_RAT_Ubiquitin-conjugating_enzyme_E2_G1,XP_022105151.1 probable ubiquitin-conjugating enzyme E2 7 [Acanthaster planci] (id=75.82%; len=153; e=1.29E-87)	1778	4	3.902	0.5449	0.003506	7	2	0	0	7	4	0	3	7	2	0	0	0.934984	0.94987	0.949735	0.848773	0.984804	0.97535	1.16027	1.55416e+06	1.5795e+06	1.57805e+06	1.41137e+06	1.6365e+06	1.6202e+06	0.860102	0.0279883	3
PMI_012546		XP_022086292.1 hyaluronan mediated motility receptor-like [Acanthaster planci] (id=58.84%; len=916; e=0.00E+00)			4.745	0.5174	0.04583	4	4	0	3	2	2	1	0	3	3	1	1	0.843121	0.940173	0.922759	0.858873	0.817216	0.906658	1.15046	116101	131643	127587	118048	111578	123309	0.85996	0.0280435	3
m.19514	26104	EYC09812.1 hypothetical protein Y032_0059g3063 [Ancylostoma ceylanicum] (id=39.62%; len=53; e=5.60E+00)			1.86	0.2402	0.328284	1	1	1	0	1	1	1	0	1	1	1	0	0.847365	0.870681	0.954949	0.99088	0.883451	0.845251	1.17229	1.02732e+06	1.05051e+06	1.15653e+06	1.20015e+06	1.06468e+06	1.01582e+06	0.859373	0.0282732	3
PMI_009735,m.10766	None,Pmi_564060_I	XP_022086298.1 intraflagellar transport protein 20 homolog [Acanthaster planci] (id=85.61%; len=132; e=1.89E-62) ,IFT20_DANRE_Intraflagellar_transport_protein_20_homolog	1531	1	2.629	0.3899	1.03213	1	1	0	0	1	1	0	0	1	1	0	0	0.881616	0.953636	0.910706	0.854292	0.954312	0.973791	1.13988	238969	257709	246560	232082	257917	263112	0.85935	0.0282825	3
m.26767,m.22503,PMI_011790,PMI_020126	Pmi_655240_A,31339,None,None	A4_PIG_Amyloid_beta_A4_protein,XP_022098539.1 amyloid beta A4 protein-like [Acanthaster planci] (id=76.40%; len=394; e=0.00E+00) ,XP_022098539.1 amyloid beta A4 protein-like [Acanthaster planci] (id=77.80%; len=482; e=0.00E+00) ,XP_022098539.1 amyloid beta A4 protein-like [Acanthaster planci] (id=56.67%; len=450; e=1.11E-137)	1340	2	2.545	0.4786	0.256316	1	1	0	0	1	1	0	0	2	1	0	0	0.617521	0.543606	0.797519	0.644031	0.655839	0.517429	1.54131	14805.8	11690.2	15862.8	13317.4	15426.9	11085.9	0.859027	0.0284094	3
PMI_009408,m.14000	None,Pmi_591692_L	XP_022097752.1 mitochondrial proton/calcium exchanger protein-like isoform X2 [Acanthaster planci] (id=85.19%; len=756; e=0.00E+00) ,LETM1_CHICK_LETM1_and_EF-hand_domain-containing_protein_1,..CUT	2063	9	2.882	0.3975	0.310827	3	3	0	3	6	6	0	6	1	1	0	0	0.833906	0.915602	0.942155	0.947975	0.848873	0.930878	1.13679	168200	187100	193785	193844	172643	190768	0.858853	0.0284775	3
m.11918	Pmi_575080_U	UGDH_MOUSE_UDP-glucose_6-dehydrogenase			4.339	0.5878	0.013805	10	10	3	7	16	13	5	8	17	12	3	9	0.823749	0.879999	0.85835	0.860062	0.929985	1	1.21396	961173	1.02381e+06	1.00084e+06	1.00192e+06	1.08363e+06	1.16684e+06	0.858704	0.0285366	3
m.16277,m.44661,m.44663,PMI_002509,PMI_009467	Pmi_607330_A,67024,67027,None,None	APOOL_HUMAN_Apolipoprotein_O-like,XP_022101519.1 MICOS complex subunit MIC27-like isoform X1 [Acanthaster planci] (id=70.57%; len=265; e=2.92E-135) ,XP_022101519.1 MICOS complex subunit MIC27-like isoform X1 [Acanthaster planci] (id=70.94%; len=265; e=2.04E-135) ,XP_022101519.1 MICOS complex subunit MIC27-like isoform X1 [Acanthaster planci] (id=68.32%; len=262; e=3.96E-127) ,XP_022101519.1 MICOS…	2609	7	4.139	0.6026	0.011406	7	5	0	0	5	3	0	0	6	4	0	0	0.843	0.869497	0.914474	0.950182	0.815089	0.83295	1.16574	351248	361228	384488	399935	337895	343746	0.857768	0.0289064	3
PMI_011971		XP_022107898.1 cubilin-like isoform X1 [Acanthaster planci] (id=78.53%; len=1970; e=0.00E+00)			4.731	0.6328	0.011012	16	14	2	2	20	13	3	1	24	17	2	4	0.926777	0.94869	0.922544	0.984857	0.895098	0.929548	1.10028	2.05299e+06	2.10204e+06	2.04065e+06	2.17943e+06	1.97857e+06	2.05741e+06	0.857759	0.02891	3
PMI_020894,PMI_008477		XP_022093821.1 putative defense protein Hdd11 [Acanthaster planci] (id=68.98%; len=216; e=3.24E-104) ,XP_022093821.1 putative defense protein Hdd11 [Acanthaster planci] (id=68.52%; len=216; e=2.15E-102)	1868	3	3.963	0.5382	0.140195	3	2	0	1	5	3	0	2	3	3	0	2	0.749369	0.965754	0.948189	0.889189	0.899457	0.946727	1.28876	222983	288813	282371	264666	268259	281856	0.857222	0.0291232	3
PMI_007353		XP_022082314.1 tubulin beta chain-like isoform X3 [Acanthaster planci] (id=97.50%; len=320; e=0.00E+00)			7.159	0.6948	0.00196					141	19	0	5	148	20	0	5	0.988856	0.949213	0.888558	0.852607	0.991908	0.915353	1.16338	5.62078e+07	5.39566e+07	5.05033e+07	4.84604e+07	5.63782e+07	5.20246e+07	0.857027	0.0292005	2
m.25305	Pmi_650123_D	DERL1_PONAB_Derlin-1			3.316	0.6863	0.002368	4	4	1	3	7	5	0	0	3	3	1	2	0.857234	0.861503	0.872694	0.900578	0.969135	0.920304	1.13054	251348	252012	254733	263227	282254	270658	0.856881	0.0292588	3
PMI_004133,m.49130,PMI_015119,m.49125,m.27800	None,73559,None,73558,Pmi_658530_T	XP_022093609.1 transducin beta-like protein 3 isoform X2 [Acanthaster planci] (id=63.63%; len=1053; e=0.00E+00) ,XP_022093609.1 transducin beta-like protein 3 isoform X2 [Acanthaster planci] (id=81.67%; len=1015; e=0.00E+00) ,XP_022093609.1 transducin beta-like protein 3 isoform X2 [Acanthaster planci] (id=79.24%; len=896; e=0.00E+00) ,XP_022093609.1 transducin beta-like protein 3 isoform X2 [Aca…	616	2	2.059	0.2064	0.705733	1	1	0	0	1	1	0	0	1	1	0	0	0.568969	0.87721	0.737728	0.498031	0.924507	0.971113	1.94991	148779	224772	198469	125875	241815	255589	0.856831	0.0292788	3
m.47315	70883	CDY79514.1 Formate dehydrogenase O gamma subunit [Caballeronia glathei] (id=31.25%; len=64; e=3.90E+00)			2.125	0.2206	0.497561	2	1	1	0	2	1	1	0	1	1	1	0	0.648057	0.930871	0.680907	0.662829	0.899542	0.988078	1.52468	982638	1.41551e+06	1.02886e+06	1.00689e+06	1.37579e+06	1.50945e+06	0.855705	0.0297293	3
m.22686	Pmi_639991_N	NEB2_HUMAN_Neurabin-2			2.078	0.2214	0.32636	2	2	1	1					2	2	0	1	0.749983	0.999322	0.870611	0.794979	0.913206	0.955547	1.33246	150678	201282	175114	159940	184115	192147	0.855472	0.029823	2
PMI_019417		XP_022103207.1 thioredoxin-1-like [Acanthaster planci] (id=61.95%; len=113; e=1.57E-44)			5.788	0.6789	0.008804	34	9	4	5	44	9	4	5	38	9	4	5	0.902081	0.977907	0.911754	0.887239	0.932349	0.997576	1.12436	3.77182e+07	4.0886e+07	3.81193e+07	3.7095e+07	3.89845e+07	4.17116e+07	0.855318	0.0298851	3
PMI_025923		ROI15277.1 Allantoinase, mitochondrial [Anabarilius grahami] (id=52.49%; len=402; e=1.07E-122)			2.417	0.2859	1.0618	1	1	1	0	1	1	1	0	1	1	1	0	0.855982	0.9123	0.917144	0.867942	0.976629	0.995667	1.16319	111721	119134	119770	113717	128012	130335	0.855186	0.029938	3
m.8290,m.14861	13017,Pmi_597800_S	XP_022091343.1 stromal membrane-associated protein 1-like isoform X4 [Acanthaster planci] (id=79.52%; len=210; e=3.85E-118) ,SMAP1_HUMAN_Stromal_membrane-associated_protein_1	822	5	4.09	0.4736	0.161112	3	3	0	3	3	3	0	3	3	3	0	3	0.822848	0.911857	0.81957	0.9689	0.954658	0.941528	1.18221	236883	261865	235882	278723	273796	270263	0.855134	0.0299593	3
m.20148,m.18180	Pmi_628312_D,23857	DNPEP_PONAB_Aspartyl_aminopeptidase,XP_022081756.1 aspartyl aminopeptidase-like [Acanthaster planci] (id=88.74%; len=453; e=0.00E+00)	1225	19	4.645	0.6421	0.034613	21	13	0	7	26	15	0	14	23	17	0	16	0.876544	0.988421	0.917522	0.938004	0.922991	0.999734	1.14054	4.03262e+06	4.54873e+06	4.22522e+06	4.31673e+06	4.24704e+06	4.59993e+06	0.85508	0.029981	3
m.24200	Pmi_645660_P	PCM1_MOUSE_Pericentriolar_material_1_protein			4.199	0.601	0.023097	18	14	0	7	24	15	0	7	15	11	0	7	0.787866	0.824178	0.878273	0.885265	1	0.937094	1.26925	1.43414e+06	1.4957e+06	1.59669e+06	1.61515e+06	1.81725e+06	1.70033e+06	0.855019	0.0300055	3
PMI_021538		XP_022089190.1 cubilin-like [Acanthaster planci] (id=59.41%; len=340; e=6.99E-115)			5.653	0.6635	0.003008	61	24	1	0	109	29	1	0	103	26	1	0	0.947825	0.942269	0.982286	0.943475	0.977328	0.97271	1.04247	4.28284e+07	4.25496e+07	4.44431e+07	4.27359e+07	4.41718e+07	4.39005e+07	0.854957	0.0300304	3
PMI_011932		XP_022108754.1 partitioning defective 6 homolog beta-like [Acanthaster planci] (id=83.33%; len=360; e=0.00E+00)			3.707	0.5637	0.154898					3	3	1	2	4	4	1	3	0.935449	0.998286	0.878055	0.847834	0.986694	0.961543	1.17745	324419	346134	304316	294055	342032	333279	0.854816	0.0300876	2
m.24985	Pmi_648860_A	ATG3_DANRE_Ubiquitin-like-conjugating_enzyme_ATG3			4.592	0.6091	0.046427	6	5	1	4	7	5	1	4	9	7	0	1	0.952597	0.952401	0.915824	0.859683	0.98626	0.975446	1.14724	1.30364e+06	1.30258e+06	1.25342e+06	1.1765e+06	1.35039e+06	1.33428e+06	0.854733	0.0301211	3
PMI_013915		PIK36780.1 hypothetical protein BSL78_26389 [Apostichopus japonicus] (id=72.04%; len=465; e=0.00E+00)			6.139	0.7279	0.00071	48	19	1	0	56	19	1	0	55	24	1	0	0.91226	0.965726	0.95501	0.914019	0.992976	0.996312	1.09214	1.55753e+07	1.64865e+07	1.63054e+07	1.56044e+07	1.69514e+07	1.70065e+07	0.854693	0.0301371	3
PMI_003449		XP_022094581.1 microfibril-associated glycoprotein 4-like [Acanthaster planci] (id=74.89%; len=235; e=5.43E-125)			3.044	0.5103	0.021734	2	2	2	0	2	1	1	0	3	2	2	0	0.953771	0.914499	0.986385	0.918559	0.917089	0.912956	1.08043	292442	278341	301856	282044	279659	278181	0.853599	0.0305808	3
PMI_004746		XP_022079225.1 LOW QUALITY PROTEIN: helicase with zinc finger domain 2-like [Acanthaster planci] (id=81.74%; len=2431; e=0.00E+00)			3.857	0.5769	0.114463	9	9	0	9	7	7	0	7	9	9	0	9	0.851365	0.954546	0.930271	0.91304	0.943634	1	1.17458	318483	357126	348067	341596	353105	373949	0.853528	0.0306099	3
m.37610,m.29930	56924,Pmi_665300_W	XP_022084693.1 methyltransferase-like protein 27 isoform X1 [Acanthaster planci] (id=72.41%; len=232; e=2.58E-118) ,WBS27_HUMAN_Williams-Beuren_syndrome_chromosomal_region_2..CUT	849	1	4.202	0.5773	0.052747	6	4	0	3	8	4	0	0	4	3	0	2	0.904731	0.975742	0.975737	0.926944	0.98322	0.947465	1.08675	1.45913e+06	1.57431e+06	1.57482e+06	1.49384e+06	1.58437e+06	1.52809e+06	0.853468	0.0306345	3
m.23826,m.38326	Pmi_644370_C,57904	CAP2_HUMAN_Adenylyl_cyclase-associated_protein_2,XP_013067336.1 PREDICTED: adenylyl cyclase-associated protein 2-like [Biomphalaria glabrata] (id=61.82%; len=220; e=2.30E-84)	830	28	6.174	0.6599	0.004679	47	23	0	0	65	34	0	0	70	28	0	0	0.952446	0.980433	0.929578	0.941383	0.971066	1	1.07576	2.35311e+07	2.42244e+07	2.29658e+07	2.32606e+07	2.39936e+07	2.4705e+07	0.853281	0.0307106	3
PMI_006011		XP_022105466.1 elongation factor 1-delta-like isoform X1 [Acanthaster planci] (id=63.31%; len=278; e=3.99E-89)			7.079	0.7107	0.033482	20	10	2	0	17	8	2	0	20	9	2	0	0.874171	0.969689	0.95601	0.879628	0.977964	0.977155	1.11873	4.44624e+06	4.92897e+06	4.8584e+06	4.47765e+06	4.97282e+06	4.96408e+06	0.852934	0.0308523	3
m.56036	83476	NP_001116982.1 sodium/potassium ATPase alpha subunit [Strongylocentrotus purpuratus] (id=81.46%; len=1030; e=0.00E+00)			6.053	0.6835	0.005743	60	38	0	35	79	44	0	39	82	48	0	44	0.955189	0.982059	0.961854	0.971005	0.986802	0.991576	1.03809	1.28642e+07	1.32239e+07	1.29524e+07	1.30744e+07	1.32863e+07	1.33541e+07	0.852828	0.0308955	3
PMI_021797,m.21907,m.42406	None,Pmi_636470_P,63997	XP_022100098.1 probable pterin-4-alpha-carbinolamine dehydratase isoform X1 [Acanthaster planci] (id=90.83%; len=109; e=2.78E-66) ,PHS_CHICK_Pterin-4-alpha-carbinolamine_dehydratase,XP_022100098.1 probable pterin-4-alpha-carbinolamine dehydratase isoform X1 [Acanthaster planci] (id=91.67%; len=108; e=2.01E-68)	415	4	3.702	0.5521	0.025873	7	3	0	0	8	5	0	2	10	6	0	3	0.881734	0.693082	0.868436	0.995928	0.703682	0.755137	1.43696	2.55779e+06	2.00177e+06	2.52471e+06	2.93743e+06	2.05765e+06	2.18992e+06	0.852461	0.0310457	3
PMI_018138,PMI_001531		XP_022105125.1 tektin-1-like [Acanthaster planci] (id=83.62%; len=403; e=0.00E+00) ,XP_022105125.1 tektin-1-like [Acanthaster planci] (id=93.28%; len=402; e=0.00E+00)	2420	6	2.921	0.3668	0.105209	1	1	0	0	5	5	0	0	4	4	0	0	0.818392	0.976647	0.939306	0.903211	0.920383	0.980662	1.19828	314006	375999	361443	346907	353798	377731	0.852432	0.0310576	3
m.12907	Pmi_583210_S	SUOX_CHICK_Sulfite_oxidase			2.068	0.1771	0.115833					1	1	1	0	3	2	2	0	0.944148	0.935071	0.658127	0.522143	0.610932	0.599939	1.80822	316718	318187	222721	180036	209940	203265	0.852288	0.0311169	2
PMI_009333		XP_022102981.1 ubiquitin carboxyl-terminal hydrolase 37-like [Acanthaster planci] (id=68.75%; len=1165; e=0.00E+00)			2.029	0.2583	0.040699	1	1	1	0	1	1	0	0					0.748263	1	0.830624	0.769764	0.890437	0.738369	1.35434	68829.8	92303.9	76590	71177.8	81874	67945.7	0.852099	0.0311945	2
PMI_008940		XP_022105979.1 hsp90 co-chaperone Cdc37-like [Acanthaster planci] (id=74.74%; len=384; e=7.45E-169)			4.75	0.6031	0.025533	11	10	1	7	13	11	0	0	15	10	0	7	0.88361	0.968052	0.910707	0.909062	0.91732	0.993336	1.12418	1.49032e+06	1.63625e+06	1.53809e+06	1.53658e+06	1.55341e+06	1.67756e+06	0.851999	0.0312356	3
PMI_008324		XP_022081807.1 tubulin alpha-1C chain-like [Acanthaster planci] (id=95.23%; len=440; e=0.00E+00)			5.308	0.7026	0.005147	56	13	1	1	89	17	1	2	101	18	1	4	0.983355	0.824849	0.968821	0.963564	0.862376	0.853053	1.19216	8.18199e+07	6.7958e+07	8.04519e+07	7.96795e+07	7.10858e+07	7.02613e+07	0.851984	0.0312415	3
PMI_025596		XP_022091210.1 cathepsin B-like [Acanthaster planci] (id=73.30%; len=367; e=0.00E+00)			4.873	0.6175	0.095051	7	4	0	4	9	6	0	5	11	7	0	0	0.876349	0.956847	0.898241	0.861082	0.916344	0.961998	1.1172	1.24888e+06	1.37093e+06	1.28327e+06	1.23393e+06	1.30976e+06	1.37474e+06	0.85173	0.031346	3
PMI_001151,m.18230	None,Pmi_618565_H	XP_022105131.1 28 kDa heat- and acid-stable phosphoprotein-like [Acanthaster planci] (id=82.07%; len=145; e=2.09E-52) ,HAP28_HUMAN_28_kDa_heat-_and_acid-stable_phosphoprotein	1918	10	4.09	0.6209	0.019283	9	8	0	6	11	9	0	5	14	9	0	6	0.859583	0.905798	0.882764	0.902099	0.955912	0.993991	1.15636	1.38069e+06	1.45425e+06	1.41783e+06	1.44886e+06	1.53512e+06	1.59623e+06	0.851674	0.0313692	3
PMI_001541		XP_022098762.1 F-actin-capping protein subunit alpha-2-like [Acanthaster planci] (id=83.68%; len=288; e=0.00E+00)			5.659	0.6328	0.014594	18	11	7	4	37	18	9	7	46	22	12	7	0.936796	0.984755	0.929434	0.903905	0.971421	0.973386	1.08945	1.29074e+07	1.35653e+07	1.28052e+07	1.2452e+07	1.33761e+07	1.34069e+07	0.851433	0.0314688	3
m.37063,m.37070	55833,55838	XP_010572593.1 PREDICTED: integrin alpha-M-like, partial [Haliaeetus leucocephalus] (id=42.27%; len=97; e=2.86E-16) ,XP_010572593.1 PREDICTED: integrin alpha-M-like, partial [Haliaeetus leucocephalus] (id=43.52%; len=108; e=1.74E-20)	37	1	2.185	0.2037	0.061159	1	1	0	0					1	1	0	0	0.611319	0.944309	0.711682	0.816845	0.951921	1	1.63581	104455	161291	121193	139045	162449	170570	0.85127	0.0315359	2
m.23832	Pmi_644283_C	CI085_RAT_Uncharacterized_protein_C9orf85_homolog			4.716	0.6331	0.004352	17	11	1	10	30	16	2	13	25	14	2	12	1	0.865822	0.867074	0.913886	0.902258	0.910836	1.15497	7.25792e+06	6.21199e+06	6.23675e+06	6.55418e+06	6.48788e+06	6.53418e+06	0.849638	0.0322134	3
m.21225,m.27227,m.27225,m.27230,m.27221,m.27222	Pmi_633441_G,39654,39652,39656,39649,39650	GH38_ORYSJ_Probable_indole-3-acetic_acid-amido_synthetase_GH3.8,XP_022106550.1 GH3 domain-containing protein-like [Acanthaster planci] (id=72.91%; len=587; e=0.00E+00) ,XP_022106550.1 GH3 domain-containing protein-like [Acanthaster planci] (id=73.13%; len=588; e=0.00E+00) ,XP_022106550.1 GH3 domain-containing protein-like [Acanthaster planci] (id=74.96%; len=587; e=0.00E+00) ,XP_022106548.1 GH3 d…	1083	2	2.105	0.44	0.070633	1	1	0	0	1	1	0	0	1	1	0	0	0.689587	0.783218	0.677833	0.81038	0.920238	1	1.47529	8511.18	9654.24	8287.69	9935.54	11288.8	12359.2	0.849597	0.0322305	3
PMI_001570,PMI_013163,m.18386	None,None,Pmi_619580_N	XP_022089537.1 uncharacterized protein LOC110978676 isoform X1 [Acanthaster planci] (id=90.71%; len=409; e=0.00E+00) ,XP_022089537.1 uncharacterized protein LOC110978676 isoform X1 [Acanthaster planci] (id=90.95%; len=409; e=0.00E+00) ,NAGA_BACSU_N-acetylglucosamine-6-phosphate_deacetylase	1905	5	4.443	0.612	0.573555	4	4	0	3	3	2	0	1	2	2	0	1	0.812502	0.96571	0.848347	0.769068	0.94028	1	1.30028	215195	257526	225067	204782	250390	266297	0.849317	0.0323472	3
PMI_003616,PMI_027397		XP_022094928.1 protein PRRC2C-like [Acanthaster planci] (id=71.48%; len=263; e=4.08E-93) ,XP_022094928.1 protein PRRC2C-like [Acanthaster planci] (id=81.06%; len=264; e=3.18E-120)	1134	5	4.366	0.5069	0.052225	4	4	0	3	1	1	0	0	2	2	0	0	0.71693	0.693251	0.716908	0.769874	0.668692	1	1.49546	107525	105531	107953	117742	98421.9	162314	0.849123	0.0324285	3
m.53026	79070	XP_022082871.1 DNA polymerase delta catalytic subunit-like [Acanthaster planci] (id=91.05%; len=1106; e=0.00E+00)			5.44	0.6771	0.006039					61	41	1	28	73	52	1	32	0.886202	0.929366	0.920874	0.931708	0.96412	1	1.12841	9.42522e+06	9.88947e+06	9.79445e+06	9.90828e+06	1.02604e+07	1.06426e+07	0.848971	0.0324922	2
PMI_007888		XP_022093324.1 elongation factor Tu, mitochondrial-like [Acanthaster planci] (id=86.94%; len=245; e=3.72E-148)			5.004	0.5737	0.0038	30	19	3	0	43	24	1	0	38	22	2	12	0.905851	1	0.922822	0.911562	0.956826	0.963155	1.10393	1.53526e+07	1.6943e+07	1.56377e+07	1.54468e+07	1.62064e+07	1.63098e+07	0.848963	0.0324956	3
PMI_011712		XP_022088997.1 trans-L-3-hydroxyproline dehydratase-like [Acanthaster planci] (id=84.01%; len=344; e=0.00E+00)			3.732	0.5801	0.083317	6	5	1	2	2	2	0	0	4	4	0	3	0.908902	0.854404	0.958824	0.866641	0.936546	0.902978	1.12221	311401	292518	328278	295496	320318	308982	0.84896	0.0324967	3
m.26042,m.25505,m.25503	Pmi_652710_R,36750,36747	RAD18_HUMAN_E3_ubiquitin-protein_ligase_RAD18,XP_022103914.1 E3 ubiquitin-protein ligase RAD18-like isoform X3 [Acanthaster planci] (id=63.05%; len=701; e=0.00E+00) ,XP_022103914.1 E3 ubiquitin-protein ligase RAD18-like isoform X3 [Acanthaster planci] (id=63.04%; len=698; e=0.00E+00)	922	2	2.856	0.3757	0.032746	1	1	0	0	1	1	0	0	1	1	0	0	0.63121	0.763996	0.67221	0.817085	0.9834	0.921193	1.55796	33274	40692.9	35743.4	43565.5	52884.8	49209.2	0.848306	0.0327711	3
PMI_012209		XP_022089702.1 fibroblast growth factor receptor 3-like isoform X2 [Acanthaster planci] (id=76.74%; len=43; e=6.51E-13)			2.501	0.3141	0.107937	1	1	1	0	1	1	1	0					0.964067	0.837347	0.944741	1	0.886146	0.873321	1.19425	164441	142679	161031	170604	151101	148980	0.848086	0.0328639	2
m.21183	Pmi_633340_A	ABCG2_MOUSE_ATP-binding_cassette_sub-family_G_member_2			4.613	0.5853	0.041146	7	4	0	0	5	5	0	5	7	6	0	6	0.86727	0.984021	0.911427	0.870917	0.920401	0.940014	1.13462	491895	558921	516251	494412	521871	533142	0.847139	0.0332639	3
PMI_007432		XP_022090735.1 probable serine carboxypeptidase CPVL isoform X1 [Acanthaster planci] (id=69.49%; len=354; e=2.07E-171)			4.973	0.6297	0.003796	22	10	0	9	22	10	0	9	22	8	0	7	0.896641	0.933381	0.916476	0.944042	0.927872	0.962227	1.07315	9.51924e+06	9.90569e+06	9.72886e+06	1.00183e+07	9.85356e+06	1.02099e+07	0.846491	0.0335389	3
PMI_023460		XP_012606494.1 GLIPR1-like protein 1 [Microcebus murinus] (id=36.18%; len=199; e=1.42E-25)			5.526	0.6723	0.000672	80	20	1	4	127	21	2	3	113	23	2	4	0.947359	0.894311	0.946045	1	0.895795	0.878953	1.13772	6.50477e+07	6.11872e+07	6.48473e+07	6.87698e+07	6.14511e+07	6.02732e+07	0.846294	0.0336225	3
PMI_002676		XP_022087087.1 UBX domain-containing protein 4-like isoform X3 [Acanthaster planci] (id=78.84%; len=189; e=1.89E-94)			3.688	0.4658	0.147774	4	3	3	0	4	3	3	0	2	2	2	0	0.902944	0.873282	0.773583	0.917386	0.924753	0.970438	1.25447	120629	116536	102758	121994	123382	129506	0.846278	0.0336296	3
PMI_012008,PMI_000523,m.25279	None,None,Pmi_650090_C	XP_022109013.1 cullin-5-like [Acanthaster planci] (id=93.22%; len=782; e=0.00E+00) ,XP_022109013.1 cullin-5-like [Acanthaster planci] (id=96.17%; len=783; e=0.00E+00) ,CUL5_HUMAN_Cullin-5	2168	10	4.127	0.5803	0.072886	6	6	0	0	5	5	0	0	6	6	0	0	0.851897	0.88938	0.979894	0.994855	0.838313	0.887773	1.18673	303221	316519	348681	354049	298300	315888	0.846188	0.0336679	3
PMI_004536		XP_022109833.1 vacuolar protein sorting-associated protein 29 [Acanthaster planci] (id=98.35%; len=182; e=3.86E-131)			4.387	0.6093	0.263845	8	8	8	0	6	4	4	0	7	6	6	0	0.908618	0.893492	0.9364	0.945694	0.915104	0.89391	1.05843	2.19209e+06	2.14362e+06	2.29327e+06	2.31748e+06	2.21567e+06	2.1595e+06	0.846129	0.0336931	3
PMI_007004		XP_022108807.1 multiple epidermal growth factor-like domains protein 6 [Acanthaster planci] (id=64.03%; len=303; e=2.60E-127)			2.649	0.397	0.062681	2	1	1	0	1	1	1	0	1	1	1	0	0.898228	0.996408	0.254022	0.368994	0.401242	0.377322	3.92252	235054	260079	61475.3	88635.5	96607.4	91736.9	0.84608	0.0337139	3
PMI_019606		XP_022099920.1 60 kDa heat shock protein, mitochondrial-like [Acanthaster planci] (id=83.67%; len=594; e=0.00E+00)			6.88	0.6814	0.005305	71	36	2	0	99	42	2	0	94	41	2	0	0.92159	0.983352	0.955788	0.931207	0.948038	0.994584	1.07921	3.85588e+07	4.11478e+07	3.99893e+07	3.89751e+07	3.9678e+07	4.16355e+07	0.846051	0.033726	3
m.18033,PMI_004017	Pmi_617581_M,None	MCA3_CRIGR_Eukaryotic_translation_elongation_factor_1_epsilon-1,XP_022091997.1 eukaryotic translation elongation factor 1 epsilon-1-like [Acanthaster planci] (id=84.09%; len=176; e=4.86E-105)	1231	8	3.304	0.4335	0.080143	10	6	0	5	8	5	0	4	10	7	0	0	0.86225	0.967024	0.924859	0.912833	0.89713	0.992941	1.15157	860719	964311	918418	911005	893332	988532	0.846048	0.0337273	3
m.19596,m.19600,PMI_004911,m.30069	26237,26239,None,Pmi_665661_R	XP_022082342.1 ATP-dependent DNA helicase Q4-like [Acanthaster planci] (id=75.73%; len=824; e=0.00E+00) ,XP_022082342.1 ATP-dependent DNA helicase Q4-like [Acanthaster planci] (id=75.36%; len=824; e=0.00E+00) ,XP_022082342.1 ATP-dependent DNA helicase Q4-like [Acanthaster planci] (id=72.39%; len=1206; e=0.00E+00) ,RECQ4_HUMAN_ATP-dependent_DNA_helicase_Q4	324	2	2.89	0.4249	0.081513	1	1	0	0	2	2	0	2	1	1	0	0	0.786547	0.957167	0.919243	0.892576	0.905167	0.983517	1.25042	92452.3	112655	108027	105077	106490	115716	0.845832	0.0338195	3
PMI_021921		XP_022090109.1 tumor protein p63-regulated gene 1-like protein [Acanthaster planci] (id=89.67%; len=300; e=0.00E+00)			5.163	0.6184	0.042224	18	10	4	6	19	9	3	6	23	11	4	7	0.95264	0.960158	0.886794	0.831245	0.928849	0.998872	1.20166	3.87522e+06	3.90834e+06	3.61075e+06	3.38997e+06	3.78659e+06	4.06719e+06	0.84566	0.0338932	3
m.22208	Pmi_637643_A	ACY1_MOUSE_Aminoacylase-1			4.267	0.6734	0.00545	13	10	1	9	8	8	2	6	9	7	2	5	0.916123	0.923527	0.939762	0.912211	0.951566	0.948414	1.04314	849614	856471	871198	845878	882744	879363	0.845442	0.0339864	3
m.19940	Pmi_627420_R	RETST_DANRE_Putative_all-trans-retinol_13,14-reductase			5.363	0.6538	0.015463	17	15	0	14	15	11	0	11	17	15	0	14	0.837484	0.96089	0.910863	0.871863	1	0.957545	1.19405	1.52421e+06	1.75252e+06	1.66003e+06	1.59288e+06	1.82502e+06	1.74779e+06	0.845285	0.0340535	3
PMI_011277,m.12141	None,Pmi_576831_I	XP_022107177.1 inositol polyphosphate multikinase-like [Acanthaster planci] (id=81.18%; len=425; e=0.00E+00) ,IPMK_MOUSE_Inositol_polyphosphate_multikinase	999	4	3.102	0.3793	0.221814	3	3	0	2	2	2	0	1	1	1	0	0	0.90133	0.918636	0.978888	0.900597	0.909	0.875823	1.11768	113266	115392	122662	113182	114103	109845	0.845202	0.0340888	3
PMI_002203		XP_022108500.1 putative bifunctional UDP-N-acetylglucosamine transferase and deubiquitinase ALG13 isoform X1 [Acanthaster planci] (id=74.23%; len=846; e=0.00E+00)			5.546	0.5838	0.010031	10	7	0	7	11	9	0	9	9	8	0	8	0.82702	0.913451	0.995197	0.849075	0.923932	0.868842	1.20335	353722	393001	429246	363291	393657	369939	0.844936	0.0342032	3
m.46212,m.46207,PMI_002224,m.46204,m.46199	69279,69278,None,69276,69272	XP_022104946.1 uncharacterized protein LOC110986919 isoform X2 [Acanthaster planci] (id=58.59%; len=1961; e=0.00E+00) ,XP_022104946.1 uncharacterized protein LOC110986919 isoform X2 [Acanthaster planci] (id=81.80%; len=1275; e=0.00E+00) ,XP_022104946.1 uncharacterized protein LOC110986919 isoform X2 [Acanthaster planci] (id=63.86%; len=2482; e=0.00E+00) ,XP_022104937.1 uncharacterized protein LOC…	1800	2	1.875	0.274	0.950415	1	1	0	0					1	1	0	0	0.75751	0.769677	0.816021	0.830041	0.901022	1	1.32011	30933.8	31346.1	33249.3	33936.8	36720.2	40768.7	0.844713	0.0342986	2
m.31681	Pmi_669981_T	TSEAR_HUMAN_Protein_TSPEAR			5.345	0.6713	0.024641	14	8	0	5	21	10	0	7	22	10	0	6	0.916206	0.935818	0.925691	0.907056	0.916214	0.940164	1.0365	7.43086e+06	7.56184e+06	7.50609e+06	7.35119e+06	7.40517e+06	7.58525e+06	0.844169	0.0345327	3
PMI_014430,m.14042	None,Pmi_591871_D	XP_022100421.1 disks large homolog 5-like isoform X3 [Acanthaster planci] (id=80.88%; len=2286; e=0.00E+00) ,DLG5_HUMAN_Disks_large_homolog_5	266	1	2.068	0.2152	0.06726	1	1	0	0	1	1	0	0					0.729662	0.650137	0.681199	1	0.637573	0.833036	1.56845	111742	99241.8	104333	152866	97579.1	127512	0.843989	0.0346103	2
m.33585,m.33584,PMI_021617,m.30269,PMI_008789	50257,50249,None,Pmi_666162_E,None	XP_022090557.1 probable RNA-binding protein EIF1AD [Acanthaster planci] (id=78.86%; len=175; e=2.72E-89) ,XP_022090557.1 probable RNA-binding protein EIF1AD [Acanthaster planci] (id=79.43%; len=175; e=6.92E-90) ,XP_022090557.1 probable RNA-binding protein EIF1AD [Acanthaster planci] (id=80.00%; len=175; e=6.83E-91) ,EIF1A_XENTR_Probable_RNA-binding_protein_EIF1AD,XP_022090557.1 probable RNA-bindi…	124	3	4.965	0.4847	0.2955	1	1	0	0	3	3	0	0	1	1	0	0	0.663987	0.8393	0.76915	0.628504	0.880764	0.927928	1.47641	101889	131634	113609	96079.8	134427	146120	0.843611	0.034774	3
m.18253	Pmi_618711_M	MMSA_AEDAE_Probable_methylmalonate-semialdehyde_dehydroge..CUT			6.186	0.678	0.001748	72	36	1	23	111	40	1	23	106	42	1	25	0.909754	1	0.900209	0.918403	0.95095	0.962507	1.11085	2.54314e+07	2.79508e+07	2.51726e+07	2.56807e+07	2.65561e+07	2.68994e+07	0.84349	0.0348262	3
m.21849,PMI_024672	Pmi_636260_W,None	WDR92_XENTR_WD_repeat-containing_protein_92,XP_022096671.1 probable cytosolic iron-sulfur protein assembly protein CIAO1 homolog isoform X1 [Acanthaster planci] (id=78.82%; len=340; e=0.00E+00)	189	2	3.763	0.5512	0.150037	3	2	0	0	1	1	0	0					0.963397	1	0.922176	0.796233	0.982319	0.960741	1.25591	52409	54352.1	50129.5	43361.4	53375.7	52195.1	0.842931	0.0350684	2
PMI_003379		XP_022083958.1 L-fucose kinase-like [Acanthaster planci] (id=81.58%; len=1048; e=0.00E+00)			5.145	0.5783	0.003361	8	6	0	5	10	7	0	7	11	9	0	9	0.837542	0.897631	0.965119	0.944181	0.902393	0.952368	1.15232	592423	634876	682139	666881	637701	673020	0.842769	0.0351387	3
m.36738	55372	WP_013346471.1 prolyl-tRNA synthetase associated domain-containing protein [Ferrimonas balearica] (id=39.29%; len=56; e=5.20E+00)			6.185	0.6808	0.028116	44	9	5	1	79	10	6	1	74	11	6	2	0.900918	0.95803	0.901737	0.864425	0.995974	0.987248	1.15218	1.30713e+08	1.39057e+08	1.30849e+08	1.25407e+08	1.44578e+08	1.43289e+08	0.842756	0.0351445	3
m.24607	Pmi_647390_D	DYST_MOUSE_Dystonin			3.936	0.521	0.035364	6	4	4	0	9	7	6	0	12	7	6	1	0.914276	0.908353	0.900441	0.893107	0.903306	0.977101	1.09405	1.66284e+06	1.65075e+06	1.63683e+06	1.62329e+06	1.64219e+06	1.78607e+06	0.842635	0.0351971	3
PMI_021040		XP_022083167.1 cilia- and flagella-associated protein 61-like [Acanthaster planci] (id=88.74%; len=613; e=0.00E+00)			5.939	0.5636	0.009271	2	2	1	0					5	5	0	3	0.870305	0.985877	0.873332	0.968151	0.968415	0.95009	1.13279	374723	425209	375995	415800	417144	409125	0.842463	0.0352719	2
PMI_001189		XP_022084205.1 uncharacterized protein LOC110975757 [Acanthaster planci] (id=44.12%; len=2838; e=0.00E+00)			2.769	0.3982	0.399265	2	2	1	1	1	1	0	0	2	2	0	0	0.192878	0.349155	0.465539	0.570582	0.68693	1	5.18463	108487	223926	313858	340112	689426	837097	0.842445	0.0352797	3
m.29104	Pmi_662512_P	PERP1_MOUSE_Plasma_cell-induced_resident_endoplasmic_reti..CUT			5.096	0.6804	0.027358	10	6	6	0	13	7	7	0	13	9	9	0	0.919758	0.979185	0.905522	0.963282	0.966448	0.997028	1.10105	1.25558e+06	1.33669e+06	1.23433e+06	1.31737e+06	1.31942e+06	1.3622e+06	0.842001	0.0354734	3
PMI_002791,m.6939	None,Pmi_513322_n	XP_022104292.1 uncharacterized protein LOC110986584 [Acanthaster planci] (id=79.24%; len=944; e=0.00E+00) ,no_annot	1654	1	2.336	0.2224	0.122461	3	1	0	0	5	1	0	0	7	1	0	0	0.562952	0.952252	0.653664	0.64366	0.806871	0.940931	1.69153	692904	1.17357e+06	790824	780052	980983	1.15625e+06	0.841861	0.0355345	3
m.14792	Pmi_597270_C	CC124_DANRE_Coiled-coil_domain-containing_protein_124			4.164	0.4328	0.098646	3	3	1	2	2	2	0	0	3	3	1	2	0.835923	0.899243	0.861179	0.918634	1	0.871792	1.19628	325710	351134	335978	359013	390850	340334	0.84183	0.035548	3
m.21884	Pmi_636290_N	NDUBA_MOUSE_NADH_dehydrogenase_[ubiquinone]_1_beta_subcom..CUT			6.303	0.6375	0.009313	10	7	1	6	9	5	1	4	10	7	1	5	0.891582	0.97709	0.938884	0.85133	0.95899	0.996039	1.16998	728333	797636	766612	695598	782957	813739	0.841458	0.0357107	3
m.37865,m.19961	57273,Pmi_627481_n	XP_022106873.1 uncharacterized protein LOC110987979 isoform X2 [Acanthaster planci] (id=70.20%; len=406; e=0.00E+00) ,no_annot	229	2	2.573	0.44	0.606406	2	1	0	0	2	2	0	0					0.834958	0.985187	0.998595	0.911249	0.870534	0.9786	1.19598	67513.5	80128.2	81147.5	73824.9	70592.3	79573.2	0.840691	0.0360476	2
m.14709,PMI_012718,m.16822	20167,None,Pmi_610540_S	XP_022097578.1 secretagogin-like isoform X1 [Acanthaster planci] (id=86.27%; len=233; e=5.13E-144) ,XP_022097579.1 secretagogin-like isoform X2 [Acanthaster planci] (id=86.82%; len=258; e=3.46E-161) ,SEGN_XENTR_Secretagogin	1343	3	4.017	0.4899	0.361203	2	2	0	2	3	3	0	3	1	1	0	0	0.847819	0.773367	0.979774	0.851821	0.806198	0.838859	1.26689	8.71757e+06	7.85092e+06	1.00935e+07	8.85252e+06	8.19215e+06	8.5964e+06	0.839945	0.0363765	3
PMI_013711		XP_022087498.1 serine/threonine-protein phosphatase 2A catalytic subunit beta isoform [Acanthaster planci] (id=98.40%; len=312; e=0.00E+00)			5.11	0.7137	0.034717	30	16	7	7	32	19	9	8	32	18	7	9	0.918947	0.88287	0.951903	0.97057	0.922704	0.890602	1.09933	3.93196e+06	3.76837e+06	4.07344e+06	4.14902e+06	3.94631e+06	3.80327e+06	0.839658	0.0365034	3
PMI_002326,PMI_003939,m.41934	None,None,63427	XP_022085724.1 CD2 antigen cytoplasmic tail-binding protein 2-like isoform X1 [Acanthaster planci] (id=80.06%; len=356; e=0.00E+00) ,XP_022085724.1 CD2 antigen cytoplasmic tail-binding protein 2-like isoform X1 [Acanthaster planci] (id=80.28%; len=355; e=0.00E+00) ,XP_022085724.1 CD2 antigen cytoplasmic tail-binding protein 2-like isoform X1 [Acanthaster planci] (id=80.00%; len=355; e=0.00E+00)	900	6	4.028	0.5405	0.038025	4	4	0	3	5	5	0	3	6	5	0	3	0.956679	0.931189	0.941307	0.914553	0.979966	0.982357	1.07414	402584	391095	394343	382997	411707	413162	0.83958	0.0365376	3
m.14375,m.29838,m.29837	Pmi_594270_G,44373,44372	GGT_BACSU_Gamma-glutamyltranspeptidase,XP_016847554.1 PREDICTED: putative gamma-glutamyltransferase YwrD [Anolis carolinensis] (id=58.04%; len=286; e=2.28E-100) ,XP_022093569.1 uncharacterized protein LOC110980857 [Acanthaster planci] (id=83.87%; len=279; e=3.63E-172)	1114	4	3.953	0.5568	0.033943	1	1	0	0	6	3	0	3	2	2	0	0	0.929149	0.897896	0.886654	0.937605	0.927092	0.906126	1.05747	205559	195158	195326	208282	202232	198738	0.839556	0.0365481	3
PMI_024802		XP_022103724.1 cob(I)yrinic acid a,c-diamide adenosyltransferase, mitochondrial-like isoform X1 [Acanthaster planci] (id=77.73%; len=247; e=1.03E-133)			4.49	0.4915	0.048445	6	4	1	3	7	6	1	4	5	5	1	3	0.875544	0.944654	0.955574	1	0.875973	0.957243	1.14215	565107	606956	615695	643416	562962	616080	0.839353	0.0366382	3
m.5307,PMI_008109	Pmi_482240_n,None	no_annot,XP_022111458.1 putative uncharacterized protein DDB_G0294196 [Acanthaster planci] (id=47.20%; len=322; e=2.08E-61)	2522	2	2.58	0.2931	0.038953	2	2	0	1	1	1	0	0	2	1	0	0	0.948095	1	0.831168	0.828916	0.789797	0.783881	1.2757	2.53329e+06	2.66742e+06	2.21722e+06	2.20469e+06	2.11038e+06	2.09796e+06	0.838969	0.0368088	3
PMI_007425		XP_022094848.1 lambda-crystallin-like isoform X1 [Acanthaster planci] (id=72.09%; len=301; e=2.48E-151)			5.277	0.5208	0.004436	7	6	0	0	9	6	0	0	11	8	1	0	0.953678	0.952638	0.949534	0.945378	0.951095	0.963209	1.01886	804939	804118	801068	797755	802204	812764	0.83881	0.0368792	3
m.40165	60632	XP_022092959.1 uncharacterized protein LOC110980514 [Acanthaster planci] (id=79.94%; len=349; e=0.00E+00)			4.524	0.4441	0.32967	3	3	1	0					4	4	1	0	0.766373	0.885966	0.830419	1	0.78577	0.819628	1.30485	197350	228773	214567	258641	202873	212108	0.838664	0.0369442	2
PMI_007734,PMI_010207		XP_022109966.1 dynein heavy chain 7, axonemal-like isoform X6 [Acanthaster planci] (id=92.64%; len=1956; e=0.00E+00) ,XP_022109925.1 dynein heavy chain 7, axonemal-like isoform X1 [Acanthaster planci] (id=96.09%; len=972; e=0.00E+00)	1627	7	3.216	0.3437	0.329716	3	3	0	3	4	4	0	4	3	3	0	2	0.823292	0.818755	0.954717	0.898391	0.848808	0.896204	1.16606	303530	302825	354626	333809	315021	329094	0.838566	0.0369877	3
PMI_007086		VBB28430.1 unnamed protein product [Acanthocheilonema viteae] (id=77.31%; len=141; e=3.35E-73)			4.344	0.5316	0.024122	12	5	1	0	13	5	1	0	13	5	1	0	0.740767	0.985622	0.81044	0.727235	0.844407	0.892562	1.3553	4.03434e+06	5.37177e+06	4.41261e+06	3.94414e+06	4.59204e+06	4.85174e+06	0.838032	0.0372261	3
m.22578,m.29383	Pmi_639443_R,43603	ROCK2_HUMAN_Rho-associated_protein_kinase_2,XP_022102584.1 rho-associated protein kinase 2-like isoform X5 [Acanthaster planci] (id=87.00%; len=1369; e=0.00E+00)	2146	35	5.882	0.6253	0.011713	25	23	0	19	29	26	0	20	28	25	0	20	0.890595	0.949367	0.925732	0.945628	0.939497	0.996223	1.1186	1.87983e+06	1.99893e+06	1.94889e+06	1.99087e+06	1.98117e+06	2.10059e+06	0.83757	0.0374325	3
m.25233,m.26077,PMI_003844	36265,Pmi_652840_S,None	XP_022099519.1 SPRY domain-containing protein 3-like [Acanthaster planci] (id=91.06%; len=470; e=0.00E+00) ,SPRY3_HUMAN_SPRY_domain-containing_protein_3,XP_022099519.1 SPRY domain-containing protein 3-like [Acanthaster planci] (id=90.85%; len=470; e=0.00E+00)	44	3	2.266	0.3929	0.262889					2	2	0	1	2	2	0	1	0.682323	0.885537	1	0.822253	0.941883	0.939313	1.46558	59015.6	76872.8	87644	71007.3	82270.3	81960.6	0.8374	0.0375085	2
PMI_013378		XP_022105832.1 60S ribosomal protein L36-like isoform X1 [Acanthaster planci] (id=91.67%; len=108; e=2.16E-56)			4.93	0.5684	0.01641	34	12	6	5	50	14	8	5	47	14	8	5	0.888676	0.946513	0.901414	0.908751	0.995832	0.964832	1.12058	2.00733e+07	2.13565e+07	2.03503e+07	2.05235e+07	2.25079e+07	2.17565e+07	0.837364	0.0375248	3
PMI_014579,m.16775,PMI_013582	None,Pmi_610280_S,None	XP_022080025.1 solute carrier family 23 member 1-like isoform X1 [Acanthaster planci] (id=81.84%; len=391; e=0.00E+00) ,S23A1_MOUSE_Solute_carrier_family_23_member_1,XP_022080025.1 solute carrier family 23 member 1-like isoform X1 [Acanthaster planci] (id=77.11%; len=686; e=0.00E+00)	720	2	3.381	0.4419	0.212777	2	1	0	0	2	2	0	2	1	1	0	0	0.765771	0.938254	0.764308	0.791811	0.858659	0.78328	1.22759	100326	119880	100858	104336	111816	103584	0.837354	0.0375295	3
PMI_012846		XP_022107898.1 cubilin-like isoform X1 [Acanthaster planci] (id=73.95%; len=1616; e=0.00E+00)			4.655	0.715	0.006654	9	7	0	6	10	8	0	5	12	8	0	5	0.929917	0.803715	0.963476	0.982597	0.875559	0.7767	1.26509	700802	607187	728350	740953	658815	586122	0.837175	0.0376095	3
m.13364,m.15433,PMI_009871,PMI_024324	18818,Pmi_601910_S,None,None	XP_022111012.1 SHC-transforming protein 1-like isoform X2 [Acanthaster planci] (id=95.51%; len=267; e=4.65E-175) ,SHC1_XENLA_SHC-transforming_protein_1,XP_022111011.1 SHC-transforming protein 1-like isoform X1 [Acanthaster planci] (id=77.35%; len=627; e=0.00E+00) ,XP_022111011.1 SHC-transforming protein 1-like isoform X1 [Acanthaster planci] (id=96.23%; len=53; e=2.04E-27)	2527	1	2.043	0.2119	0.016103					1	1	0	0	1	1	0	0	0.452081	0.942068	0.588226	0.563455	0.730715	1	2.21199	217817	463849	281517	278051	356133	494185	0.836528	0.0379005	2
PMI_024376		XP_022093672.1 NAD-dependent protein deacetylase sirtuin-2-like isoform X3 [Acanthaster planci] (id=72.42%; len=330; e=6.94E-173)			3.952	0.6434	0.048186	2	2	1	0	3	2	1	1					0.804767	0.960613	1	0.795487	0.894986	0.767994	1.30209	33341.2	39820.8	41447.1	32966.8	37088.2	31828.5	0.836351	0.0379803	2
m.18941	Pmi_622570_C	CSK_MOUSE_Tyrosine-protein_kinase_CSK			3.401	0.5227	0.012175	5	5	3	2	7	6	1	5	4	4	2	2	0.892287	0.911213	0.929517	0.936643	0.897532	0.968421	1.08532	639657	653570	666134	673531	643725	692797	0.836191	0.0380521	3
PMI_005008		XP_022099559.1 putative Ras-related protein Rab-33 [Acanthaster planci] (id=92.34%; len=235; e=5.21E-160)			3.718	0.4877	0.05622	5	3	2	1	7	2	1	0					0.95142	0.77082	0.953585	1	0.826785	0.835417	1.29732	913558	740353	916902	960975	793313	801563	0.835624	0.0383085	2
m.49098,m.49099,m.49097	73470,73472,73468	XP_022079849.1 granulins-like isoform X7 [Acanthaster planci] (id=50.82%; len=183; e=1.13E-49) ,XP_022079850.1 granulins-like isoform X8 [Acanthaster planci] (id=49.02%; len=153; e=3.47E-39) ,XP_022079850.1 granulins-like isoform X8 [Acanthaster planci] (id=50.29%; len=175; e=9.85E-48)	322	5	5.47	0.7057	0.056691	6	4	0	3	7	5	0	4					0.768307	0.391112	0.590013	1	0.534901	0.461289	2.55682	1.09536e+06	564963	833993	1.42568e+06	726876	636877	0.835531	0.0383507	2
PMI_023682		XP_022105584.1 fumarylacetoacetase-like [Acanthaster planci] (id=90.57%; len=350; e=0.00E+00)			5.172	0.61	0.008477	14	10	1	0	27	16	1	0	28	17	1	0	0.945223	0.915356	0.928048	0.941101	0.943205	0.945013	1.03263	6.50666e+06	6.30069e+06	6.3875e+06	6.49442e+06	6.5066e+06	6.53344e+06	0.835307	0.0384521	3
m.57009,m.29558	85205,Pmi_663904_S	XP_022100818.1 small acidic protein-like isoform X1 [Acanthaster planci] (id=64.02%; len=264; e=1.63E-85) ,SMAP_DANRE_Small_acidic_protein	51	8	3.422	0.3982	0.140045	6	4	0	0	5	4	0	0	5	5	0	0	0.792928	0.856808	0.847743	0.975928	0.909584	0.976159	1.23108	348888	377151	373088	429191	400357	429994	0.835223	0.0384904	3
m.28307	41612	XP_022097673.1 fibrocystin-L-like isoform X1 [Acanthaster planci] (id=81.98%; len=111; e=1.68E-47)			3.644	0.5069	0.018004	1	1	1	0	1	1	1	0	2	2	1	0	0.68732	0.793297	0.660409	0.576699	0.994432	0.819875	1.72435	88736.5	102285	85047.5	74711.7	127812	105268	0.834951	0.0386139	3
PMI_029766		XP_022105196.1 protein ABHD17B-like [Acanthaster planci] (id=97.59%; len=291; e=0.00E+00)			7.078	0.717	0.069312	9	8	8	0	8	7	7	0	9	8	8	0	0.893609	1	0.852385	0.903556	0.953274	0.974828	1.17318	1.86589e+06	2.08814e+06	1.77911e+06	1.8869e+06	1.99081e+06	2.03536e+06	0.834822	0.0386721	3
PMI_004059		XP_002738519.1 PREDICTED: isocitrate dehydrogenase [NADP], mitochondrial-like [Saccoglossus kowalevskii] (id=61.42%; len=394; e=2.82E-169)			6.824	0.6718	0.003821	77	23	1	1	80	24	2	1	90	24	2	1	0.954068	0.985423	0.952386	0.959749	0.953814	0.995138	1.04489	3.67251e+07	3.7906e+07	3.6661e+07	3.6942e+07	3.66952e+07	3.82943e+07	0.834416	0.038857	3
m.38045	57558	XP_022098742.1 serpin B6-like isoform X3 [Acanthaster planci] (id=84.82%; len=191; e=6.83E-111)			3.152	0.5051	0.175842	5	3	0	0					6	4	0	0	0.989276	0.883722	0.962063	0.921763	0.857542	0.979656	1.15362	826987	738763	804281	770574	716876	818962	0.834357	0.038884	2
m.24700	Pmi_647634_U	UBXN1_RAT_UBX_domain-containing_protein_1			3.845	0.607	0.01883	6	4	1	0					6	5	0	0	0.834335	0.850841	0.876769	0.896186	0.963131	0.987771	1.1839	396736	404690	416995	426323	458335	470346	0.834124	0.0389903	2
PMI_012469		PIK58596.1 hypothetical protein BSL78_04502 [Apostichopus japonicus] (id=67.21%; len=61; e=6.08E-22)			3.132	0.5295	0.164968	4	2	2	0	4	2	2	0	3	2	2	0	0.778944	0.800646	0.89402	0.857255	0.878183	0.966683	1.24102	390729	403308	447838	426743	440681	485105	0.833957	0.0390664	3
m.31355	Pmi_669130_S	SFI1_PAPAN_Protein_SFI1_homolog			2.113	0.2239	0.013943	1	1	1	0	1	1	1	0	1	1	1	0	0.586609	0.997929	0.621156	0.476704	0.840414	0.885333	2.09339	613572	1.04635e+06	633579	492399	881449	927099	0.833942	0.0390735	3
m.17730	Pmi_616050_W	WDR1_BOVIN_WD_repeat-containing_protein_1			6.716	0.7205	0.00914	51	28	1	17	81	33	0	23	78	36	1	19	0.980606	0.974397	0.970562	0.992958	0.988688	0.98397	1.02308	2.29001e+07	2.27577e+07	2.26659e+07	2.31905e+07	2.30893e+07	2.29833e+07	0.833754	0.0391594	3
m.12936	Pmi_583620_P	PPT1_BOVIN_Palmitoyl-protein_thioesterase_1			6.004	0.5978	0.029881	22	11	1	9	23	11	1	9	28	11	1	9	0.924138	0.965608	0.957596	0.873689	0.994309	0.989082	1.13806	4.16142e+06	4.35331e+06	4.31371e+06	3.92993e+06	4.47948e+06	4.45293e+06	0.833721	0.0391746	3
PMI_007868		XP_022084009.1 RNA-binding protein NOB1-like [Acanthaster planci] (id=67.80%; len=500; e=0.00E+00)			4.44	0.6215	0.017081	15	8	0	5	17	10	0	5	16	13	0	7	0.861821	0.998022	0.916274	0.924121	0.956983	0.98233	1.15804	3.52053e+06	4.07634e+06	3.74282e+06	3.77419e+06	3.9087e+06	4.01097e+06	0.833614	0.0392232	3
m.13849	Pmi_590500_n	no_annot			4.857	0.6386	0.004153	22	8	1	0	29	7	1	0	28	7	1	0	0.904795	0.928459	0.910209	0.913067	0.982189	0.980966	1.08554	9.11317e+06	9.3436e+06	9.18345e+06	9.19526e+06	9.9026e+06	9.87356e+06	0.832871	0.0395642	3
m.24568	Pmi_647261_I	INT3_PONAB_Integrator_complex_subunit_3			3.145	0.4641	0.178632	2	2	0	1	3	3	0	2	3	3	0	3	0.870945	0.957279	0.954176	0.898364	0.901378	0.957088	1.09913	114255	125715	126060	118485	118252	125734	0.832827	0.0395841	3
PMI_021138		XP_022089500.1 uncharacterized protein LOC110978657 [Acanthaster planci] (id=69.60%; len=125; e=8.97E-50)			2.953	0.4509	0.331088	3	3	0	2	3	3	0	1	2	2	0	1	0.897581	0.917326	0.984092	0.928008	0.885232	0.82686	1.19015	359558	366830	399494	374503	355218	327741	0.832386	0.0397872	3
m.54421,m.54427	80978,80981	XP_022091558.1 alpha-N-acetylgalactosaminidase-like isoform X1 [Acanthaster planci] (id=82.19%; len=410; e=0.00E+00) ,XP_022091558.1 alpha-N-acetylgalactosaminidase-like isoform X1 [Acanthaster planci] (id=82.68%; len=410; e=0.00E+00)	517	17	5.773	0.6678	0.001956	18	9	0	0	41	17	0	0	36	17	0	1	0.908046	0.975918	0.878012	0.924195	0.943141	1	1.13894	5.16885e+06	5.55071e+06	4.99634e+06	5.26023e+06	5.36319e+06	5.68894e+06	0.832229	0.0398597	3
PMI_015227,m.18388	None,Pmi_619620_F	XP_022095375.1 LOW QUALITY PROTEIN: factor VIII intron 22 protein-like [Acanthaster planci] (id=84.04%; len=282; e=2.96E-170) ,F8I2_HUMAN_Factor_VIII_intron_22_protein	2278	4	5.069	0.5792	0.038858	3	3	0	2	3	3	0	1	3	3	0	1	0.795616	0.88171	0.846869	0.782897	0.905258	1	1.27731	231381	256349	246463	227878	263647	291047	0.831562	0.0401674	3
m.35717,m.25916	53837,Pmi_652340_X	XP_022088684.1 exportin-5-like isoform X3 [Acanthaster planci] (id=78.19%; len=1201; e=0.00E+00) ,XPO5_HUMAN_Exportin-5	663	11	3.885	0.5435	0.041983	7	7	0	4	9	7	0	5	6	6	0	3	0.805614	0.959174	0.937161	0.915965	0.901477	0.982438	1.21949	420833	499736	489804	478659	469030	512621	0.831229	0.0403218	3
m.26160	38054	XP_022079439.1 CAP-Gly domain-containing linker protein 1-like isoform X2 [Acanthaster planci] (id=82.48%; len=759; e=0.00E+00)			2.828	0.3785	0.473413	2	2	0	2	1	1	0	0	1	1	0	0	0.986169	0.909453	0.827221	0.888834	0.88997	0.605152	1.62962	123142	111821	100082	111904	111532	76505.3	0.83111	0.0403769	3
PMI_015460,m.22404,PMI_004109	None,31150,None	XP_022085277.1 28S ribosomal protein S2, mitochondrial-like [Acanthaster planci] (id=71.09%; len=256; e=3.84E-124) ,XP_022085277.1 28S ribosomal protein S2, mitochondrial-like [Acanthaster planci] (id=78.54%; len=261; e=3.05E-149) ,XP_022085277.1 28S ribosomal protein S2, mitochondrial-like [Acanthaster planci] (id=77.78%; len=261; e=1.49E-147)	645	6	4.455	0.5529	0.17683	5	4	0	2	5	4	0	1	4	2	0	1	0.815045	0.98217	0.96631	0.863353	0.918939	0.907671	1.20505	170163	205708	202555	181402	192783	189518	0.830926	0.0404627	3
m.22264,PMI_012328,m.16986	Pmi_638081_X,None,22333	XPP1_BOVIN_Xaa-Pro_aminopeptidase_1,XP_022089903.1 xaa-Pro aminopeptidase 1-like [Acanthaster planci] (id=66.38%; len=458; e=0.00E+00) ,XP_022089903.1 xaa-Pro aminopeptidase 1-like [Acanthaster planci] (id=82.28%; len=745; e=0.00E+00)	1936	1	2.209	0.2834	0.029905	1	1	0	0	1	1	0	0					0.83059	0.988055	0.815324	0.776855	0.777478	1	1.28724	192093	228546	188561	179706	179850	231310	0.830837	0.0405037	2
m.33645,PMI_003000	50356,None	XP_022085697.1 density-regulated protein homolog [Acanthaster planci] (id=80.25%; len=162; e=3.47E-79) ,XP_022085697.1 density-regulated protein homolog [Acanthaster planci] (id=79.47%; len=190; e=6.74E-95)	2287	9	3.863	0.6201	0.063468	4	3	0	2	7	5	0	4	10	7	0	6	0.865921	0.912132	0.913681	0.930075	1	0.938041	1.15484	3.42097e+06	3.59869e+06	3.60882e+06	3.67147e+06	3.95014e+06	3.69734e+06	0.830831	0.0405067	3
m.27679	Pmi_658144_R	RL15_RAT_60S_ribosomal_protein_L15_>gi			4.89	0.55	0.030795	20	8	1	7	30	8	1	7	33	9	1	8	1	0.89596	0.967875	0.899207	0.911024	0.908564	1.11612	1.67627e+07	1.49863e+07	1.62208e+07	1.50724e+07	1.52407e+07	1.51795e+07	0.830618	0.0406056	3
m.22516	Pmi_639190_A	ATG7_CHICK_Ubiquitin-like_modifier-activating_enzyme_ATG7			3.855	0.4365	0.037893	6	6	0	3	8	7	0	4	10	9	0	5	0.89109	0.935287	0.884529	0.852731	0.949062	0.894147	1.11297	582625	606544	575757	559651	616492	581759	0.830225	0.0407887	3
m.42611,PMI_010485	64247,None	XP_022083915.1 eukaryotic translation initiation factor 2 subunit 2-like [Acanthaster planci] (id=87.01%; len=331; e=0.00E+00) ,XP_022083915.1 eukaryotic translation initiation factor 2 subunit 2-like [Acanthaster planci] (id=86.71%; len=331; e=0.00E+00)	554	17	5.579	0.6444	0.017081	18	8	0	3	20	13	0	5	19	16	0	7	0.852352	0.991175	0.912376	0.921721	0.958955	0.978561	1.16287	3.61605e+06	4.20444e+06	3.87017e+06	3.90906e+06	4.06707e+06	4.14977e+06	0.829959	0.0409127	3
m.25296	Pmi_650161_M	MA2A1_HUMAN_Alpha-mannosidase_2			4.021	0.5	0.032814					14	12	0	9	18	14	0	10	0.944948	0.945745	0.997729	0.992561	0.922173	0.853476	1.16902	1.07057e+06	1.07194e+06	1.13235e+06	1.12605e+06	1.04644e+06	967662	0.829936	0.0409235	2
PMI_009349		XP_022094945.1 nuclear pore complex protein Nup160-like isoform X2 [Acanthaster planci] (id=85.97%; len=1005; e=0.00E+00)			4.714	0.5749	0.063792	13	10	0	7	14	13	0	8	13	10	0	7	0.880693	0.965682	0.937054	0.888635	0.9411	0.997078	1.13215	877368	962312	933624	885358	937757	993737	0.829923	0.0409294	3
PMI_014269		XP_022086633.1 signal transducer and activator of transcription 5A-like isoform X1 [Acanthaster planci] (id=74.94%; len=834; e=0.00E+00)			4.932	0.5443	0.053389					16	13	0	6	15	11	0	6	0.964045	0.963685	0.990996	0.974891	0.888687	0.981205	1.11512	2.13417e+06	2.13426e+06	2.19601e+06	2.15952e+06	1.96622e+06	2.17258e+06	0.829795	0.0409894	2
PMI_020640		XP_022095718.1 serine/threonine-protein kinase VRK1-like [Acanthaster planci] (id=76.52%; len=460; e=0.00E+00)			3.649	0.5565	0.006675	10	9	2	7	16	14	3	7	12	9	2	4	0.937483	0.849371	0.854171	0.96355	0.935323	0.997474	1.17437	2.1777e+06	1.97307e+06	1.98397e+06	2.23733e+06	2.16823e+06	2.31576e+06	0.82979	0.0409914	3
m.15631	Pmi_603110_C	CETN3_HUMAN_Centrin-3			2.979	0.218	0.316468	1	1	0	0	2	2	1	1	1	1	0	0	0.9065	0.855503	0.926272	0.817715	0.872552	0.93617	1.14486	98991.4	93679.5	100922	89878.1	96032.4	102135	0.829698	0.0410345	3
PMI_007325		XP_022094500.1 polyadenylate-binding protein 2-B-like [Acanthaster planci] (id=90.48%; len=210; e=3.29E-127)			2.954	0.3584	0.01212	4	4	0	0	3	3	1	2	5	5	2	2	0.97714	0.989531	0.877446	0.822253	0.972776	0.970094	1.20344	455704	460917	409048	382208	452832	452548	0.829636	0.0410637	3
m.29313,m.32211	Pmi_663163_S,48210	SLNL1_MOUSE_Schlafen-like_protein_1,XP_022094546.1 schlafen-like protein 1 [Acanthaster planci] (id=80.88%; len=204; e=9.04E-120)	1267	3	2.806	0.3229	0.163945	1	1	0	0	1	1	0	0	1	1	0	0	0.582295	0.88533	0.635824	0.588379	0.769775	0.864465	1.52042	121520	188056	133324	123348	164827	187673	0.829604	0.0410786	3
m.6324	10361	XP_022109262.1 mannan-binding lectin serine protease 1-like [Acanthaster planci] (id=70.09%; len=331; e=3.58E-166)			2.934	0.5502	0.083716	3	1	1	0	3	1	1	0	3	1	1	0	0.891867	1	0.949894	0.859547	0.910945	0.924761	1.1634	1.34024e+06	1.50304e+06	1.42717e+06	1.29156e+06	1.36853e+06	1.38957e+06	0.829502	0.0411262	3
m.46942,PMI_000225,m.17680	70286,None,Pmi_615643_A	XP_022079519.1 annexin-B12-like [Acanthaster planci] (id=81.03%; len=448; e=0.00E+00) ,XP_022079519.1 annexin-B12-like [Acanthaster planci] (id=85.95%; len=491; e=0.00E+00) ,ANXA7_BOVIN_Annexin_A7	2284	17	4.559	0.6343	0.007218	13	12	0	1	20	16	0	1	22	19	0	1	0.983599	0.791562	0.97767	0.934196	0.766873	0.810722	1.28261	5.02336e+06	4.04581e+06	4.99955e+06	4.77372e+06	3.91719e+06	4.15272e+06	0.829435	0.0411575	3
m.50743,m.30467	76003,Pmi_666783_R	XP_022086163.1 ran GTPase-activating protein 1-like [Acanthaster planci] (id=80.24%; len=587; e=0.00E+00) ,RAGP1_HUMAN_Ran_GTPase-activating_protein_1	1181	17	4.344	0.5746	0.002362	10	10	0	9	14	12	0	10	16	14	0	13	0.810397	0.895616	0.864607	0.864225	0.970663	0.987753	1.21885	1.21597e+06	1.33997e+06	1.29375e+06	1.29443e+06	1.45439e+06	1.47935e+06	0.829407	0.0411708	3
PMI_013635		XP_022098485.1 uncharacterized protein LOC110983493 [Acanthaster planci] (id=83.10%; len=432; e=0.00E+00)			5.617	0.6972	0.006233	41	19	0	17	77	30	0	23	69	24	0	17	0.934469	0.9904	0.922636	0.909325	0.943159	1	1.09972	2.81723e+07	2.99011e+07	2.78383e+07	2.7462e+07	2.84831e+07	3.01973e+07	0.829406	0.0411713	3
m.20183	27185	XP_022085538.1 vesicle-associated membrane protein 2-like isoform X1 [Acanthaster planci] (id=97.94%; len=97; e=3.08E-62)			5.895	0.6185	0.04739	6	2	2	0	8	3	3	0	8	3	3	0	0.915591	0.913817	0.885167	0.886038	0.977482	0.980773	1.10801	681327	680337	658785	658946	727786	730372	0.828823	0.0414446	3
m.21425	Pmi_634460_M	MY18A_HUMAN_Unconventional_myosin-XVIIIa			2.893	0.3526	0.428265	1	1	0	0	2	2	1	0	3	3	1	1	0.80113	0.974156	0.905926	0.99525	0.811135	0.96402	1.24231	67628.8	82766.6	77244.6	84326.4	69529.2	81448.6	0.828715	0.0414952	3
m.10503	Pmi_560780_S	S35A2_CANFA_UDP-galactose_translocator			3.08	0.4088	0.254404	1	1	1	0	4	4	2	2	3	3	1	2	0.764534	0.889734	0.994233	0.847107	0.972091	0.942014	1.30044	370235	429675	479099	409478	468396	455791	0.828485	0.0416032	3
PMI_010276		XP_022107686.1 plasminogen activator inhibitor 1 RNA-binding protein-like isoform X1 [Acanthaster planci] (id=70.12%; len=338; e=1.67E-93)			6.483	0.6843	0.004056	59	20	0	0	88	23	0	0	72	23	0	0	0.87227	0.909797	0.875546	0.892117	0.980621	0.986263	1.13069	2.08052e+07	2.17041e+07	2.08646e+07	2.12596e+07	2.33858e+07	2.35355e+07	0.828475	0.041608	3
m.49172	73594	XP_022080300.1 cytochrome P450 3A24-like [Acanthaster planci] (id=79.61%; len=520; e=0.00E+00)			5.081	0.55	0.236587	8	6	0	6	11	9	0	8	10	7	0	7	0.941934	0.987241	0.927155	0.954206	0.955025	0.970932	1.06481	716971	751517	706285	726661	726893	739457	0.828468	0.0416114	3
m.19173,m.42747	Pmi_623651_P,64332	POGZ_HUMAN_Pogo_transposable_element_with_ZNF_domain,PIK33200.1 putative pogo transposable element with ZNF domain isoform X4 [Apostichopus japonicus] (id=36.59%; len=410; e=2.68E-80)	1616	3	3.27	0.3758	0.155582					2	2	0	2	2	2	0	2	0.806485	0.916245	0.847014	0.973901	0.973558	0.962956	1.20759	188608	214282	198044	227864	227700	225172	0.827926	0.0418665	2
m.27493	40007	XP_022087125.1 protein CDV3 homolog [Acanthaster planci] (id=84.23%; len=260; e=1.08E-107)			4.711	0.5814	0.00087	18	8	2	6	25	14	3	11	24	12	3	9	0.930487	0.973693	0.910215	0.904003	0.976247	0.990212	1.09536	5.99885e+06	6.26864e+06	5.86523e+06	5.82287e+06	6.28117e+06	6.3762e+06	0.827714	0.0419667	3
PMI_006579,m.15661	None,Pmi_603280_T	XP_022079954.1 transmembrane protein 106B-like [Acanthaster planci] (id=59.52%; len=252; e=5.84E-89) ,T106B_DANRE_Transmembrane_protein_106B	2654	4	5.381	0.5214	0.640815					3	3	0	2	2	2	0	1	1	0.761498	0.811867	0.776664	0.773946	0.817729	1.3132	91996.6	69899.2	74687	71262.2	71062.1	75166.3	0.827126	0.0422449	2
PMI_013529		XP_022105243.1 betaine--homocysteine S-methyltransferase 1-like [Acanthaster planci] (id=81.23%; len=277; e=6.52E-162)			6.879	0.7004	0.000988	72	21	1	0	137	21	1	0	122	22	1	0	0.872184	0.992367	0.892497	0.845675	0.981832	0.985373	1.17346	6.86722e+07	7.81432e+07	7.02712e+07	6.65686e+07	7.73003e+07	7.75846e+07	0.82697	0.042319	3
PMI_002469		XP_022104826.1 ryanodine receptor 2-like [Acanthaster planci] (id=84.95%; len=2578; e=0.00E+00)			3.401	0.4791	0.406838	1	1	0	0	2	2	0	2	2	2	0	2	0.865246	0.896152	0.988666	0.873213	0.900163	0.894451	1.14264	49364.6	51326.5	57289.9	50067.2	51474.1	51312.1	0.826754	0.0424214	3
m.26808	38997	XP_022081484.1 adenosine 3'-phospho 5'-phosphosulfate transporter 1-like isoform X1 [Acanthaster planci] (id=86.36%; len=308; e=0.00E+00)			2.99	0.5006	0.884559	1	1	0	0	1	1	1	0	1	1	1	0	0.681	0.899864	0.972007	0.917806	0.888688	0.897866	1.42732	106778	139945	149255	144807	134249	137164	0.826729	0.0424333	3
m.14355,m.12090,m.14353	19823,Pmi_576450_N,19822	XP_022110191.1 NADH dehydrogenase [ubiquinone] 1 beta subcomplex subunit 5, mitochondrial-like isoform X2 [Acanthaster planci] (id=80.13%; len=151; e=1.63E-90) ,NDUB5_MACFA_NADH_dehydrogenase_[ubiquinone]_1_beta_subcom..CUT,XP_022110191.1 NADH dehydrogenase [ubiquinone] 1 beta subcomplex subunit 5, mitochondrial-like isoform X2 [Acanthaster planci] (id=77.42%; len=186; e=3.98E-107)	2678	2	3.833	0.4939	0.034064	1	1	0	0	2	1	0	0	3	2	0	1	0.972176	0.65857	0.931119	0.979147	0.761028	0.727879	1.48678	687654	380558	638702	692538	497753	449876	0.826075	0.0427444	3
PMI_005508,m.15700	None,Pmi_603570_B	XP_022103423.1 Bardet-Biedl syndrome 4 protein-like isoform X1 [Acanthaster planci] (id=86.96%; len=506; e=0.00E+00) ,BBS4_HUMAN_Bardet-Biedl_syndrome_4_protein	239	3	3.403	0.4076	0.572938					2	2	0	1	2	2	0	2	0.93493	0.833092	0.986706	0.987116	0.878857	0.854344	1.18488	120943	107562	128263	128032	113293	110165	0.825928	0.0428144	2
PMI_015421		XP_022103094.1 cytoplasmic dynein 2 heavy chain 1-like isoform X1 [Acanthaster planci] (id=94.66%; len=1796; e=0.00E+00)			4.334	0.5811	0.01689	17	15	0	6	18	15	0	7	21	17	0	11	0.849757	0.955292	0.936962	0.995332	0.922553	0.950619	1.17131	735368	824934	811869	861058	796945	819645	0.82539	0.0430711	3
m.15472	Pmi_602120_P	PAIRB_MOUSE_Plasminogen_activator_inhibitor_1_RNA-binding..CUT			6.483	0.6843	0.004056	61	20	1	0	98	28	3	0	83	25	2	0	0.878225	0.916748	0.88067	0.896744	0.983168	0.98914	1.12629	2.18475e+07	2.28079e+07	2.18906e+07	2.22911e+07	2.44528e+07	2.46123e+07	0.824468	0.043513	3
m.16008,m.50308	Pmi_605530_n,75333	no_annot,OGI47640.1 hypothetical protein A2637_02945 [Candidatus Muproteobacteria bacterium RIFCSPHIGHO2_01_FULL_65_16] (id=36.17%; len=94; e=2.30E-02)	972	4	6.418	0.5973	0.047748	6	5	0	0	9	5	0	0	10	4	0	0	1	0.853109	0.74628	0.826332	0.727731	0.670375	1.4917	1.30144e+06	1.11021e+06	971586	1.07564e+06	946511	871452	0.824035	0.0437211	3
PMI_014388		XP_022090706.1 alpha-mannosidase 2-like [Acanthaster planci] (id=85.04%; len=1210; e=0.00E+00)			5.161	0.5456	0.032814	14	11	1	10	16	13	0	9	18	14	0	10	0.921273	0.941728	0.995983	0.990664	0.911628	0.869676	1.14523	1.0116e+06	1.03448e+06	1.09618e+06	1.09132e+06	1.00387e+06	959825	0.823799	0.0438352	3
PMI_022573		XP_022094007.1 alpha-mannosidase 2C1-like [Acanthaster planci] (id=82.33%; len=583; e=0.00E+00)			5.196	0.6021	0.020535					9	8	1	6	13	11	1	10	0.945451	0.903126	1	0.958136	0.915453	0.913569	1.10726	902960	860331	958068	915323	872606	871737	0.823466	0.0439957	2
PMI_008325		XP_022081801.1 tubulin alpha-1A chain-like isoform X1 [Acanthaster planci] (id=95.78%; len=427; e=0.00E+00)			5.319	0.7338	0.00166	92	18	0	5	123	21	0	0	145	22	0	3	0.980135	0.833544	0.970486	0.969709	0.869779	0.869217	1.17587	8.92257e+07	7.53703e+07	8.82321e+07	8.78858e+07	7.86692e+07	7.85526e+07	0.823455	0.0440007	3
m.21554	Pmi_634920_E	ENPL_CANFA_Endoplasmin			5.949	0.6609	0.008525	135	57	0	45	226	74	1	55	218	75	1	55	0.96789	0.981909	0.95014	0.981505	0.996827	0.982501	1.04914	6.55768e+07	6.65412e+07	6.44012e+07	6.65103e+07	6.75598e+07	6.65581e+07	0.82329	0.0440806	3
m.20226	Pmi_628700_K	KLP6_RAT_Kinesin-like_protein_KLP6			5.491	0.695	0.027553	19	15	1	14	24	21	0	20	31	25	0	25	0.861447	0.849663	0.868406	0.946332	0.840934	0.862799	1.12533	2.1122e+06	2.06717e+06	2.12983e+06	2.32994e+06	2.04207e+06	2.09349e+06	0.823238	0.0441059	3
m.17301	Pmi_613680_T	TALDO_MOUSE_Transaldolase			5.855	0.628	0.007116	44	22	1	18	74	29	3	22	78	30	3	23	0.97623	0.885775	0.968981	0.998485	0.900374	0.932785	1.12724	3.02809e+07	2.73933e+07	3.00776e+07	3.09972e+07	2.7854e+07	2.89202e+07	0.823118	0.0441639	3
m.19960,PMI_008717	Pmi_627480_C,None	CISD3_HUMAN_CDGSH_iron-sulfur_domain-containing_protein_3..CUT,XP_022109315.1 CDGSH iron-sulfur domain-containing protein 3, mitochondrial-like [Acanthaster planci] (id=76.80%; len=125; e=6.33E-65)	503	5	3.233	0.3408	0.36936	3	3	0	0	1	1	0	0	5	3	0	0	0.867634	0.95289	0.807525	0.817732	0.965518	0.966951	1.19743	791217	866873	738676	747531	881188	881944	0.822949	0.0442455	3
PMI_017053		XP_022079992.1 superoxide dismutase [Cu-Zn]-like [Acanthaster planci] (id=63.51%; len=211; e=4.34E-86)			4.708	0.6724	0.057661	12	6	3	0	29	8	3	0	26	8	3	0	0.944198	0.934587	0.863444	0.876776	0.942019	0.894213	1.09352	6.90127e+06	6.85368e+06	6.34912e+06	6.43044e+06	6.9327e+06	6.53574e+06	0.822691	0.0443706	3
m.16662	Pmi_609580_P	PTTG_MOUSE_Pituitary_tumor-transforming_gene_1_protein-int..CUT			4.219	0.6336	0.031715	7	5	5	0	6	4	4	0	10	5	5	0	0.975543	0.818084	0.965244	0.944685	0.907231	0.832208	1.19247	1.51564e+06	1.26849e+06	1.49741e+06	1.47133e+06	1.4084e+06	1.28974e+06	0.82257	0.0444291	3
m.17964	Pmi_617260_R	RPE65_AMBTI_Retinoid_isomerohydrolase			3.863	0.546	0.058009	6	5	1	4	4	4	0	4	7	7	1	4	0.863335	0.934601	0.86971	0.927058	0.936869	0.997891	1.15586	1.26479e+06	1.36915e+06	1.27392e+06	1.35814e+06	1.37183e+06	1.4609e+06	0.82255	0.0444389	3
m.26813	Pmi_655380_X	XIRP2_MOUSE_Xin_actin-binding_repeat-containing_protein_2			5.645	0.6857	0.004845	19	17	5	6	28	17	8	5	27	19	7	12	0.946073	0.75767	0.741921	0.85855	0.878723	0.953693	1.28544	2.53853e+06	2.03021e+06	1.98526e+06	2.29626e+06	2.35039e+06	2.55203e+06	0.822213	0.0446027	3
PMI_016203		XP_022087367.1 glutathione S-transferase P-like [Acanthaster planci] (id=82.67%; len=277; e=1.15E-177)			6.619	0.6919	0.173097	4	4	0	2	9	8	0	5	12	11	1	8	0.917484	0.958469	0.843524	0.909188	1	0.910576	1.1855	1.63401e+06	1.70949e+06	1.50459e+06	1.62156e+06	1.78239e+06	1.62291e+06	0.821958	0.0447263	3
PMI_023290		XP_022107375.1 vitamin K epoxide reductase complex subunit 1-like protein 1 [Acanthaster planci] (id=73.45%; len=177; e=1.54E-93)			3.137	0.4696	0.097375	1	1	1	0	1	1	1	0	1	1	1	0	0.898378	0.8911	0.860567	0.899113	0.827069	0.827587	1.08711	34051.3	33805.7	31923.1	33917.6	30769.8	31589.8	0.82195	0.0447306	3
PMI_015356		XP_022087448.1 voltage-dependent anion-selective channel protein 2-like [Acanthaster planci] (id=96.47%; len=283; e=0.00E+00)			6.743	0.728	0.005135	79	19	0	18	114	20	0	19	118	21	0	19	0.948918	0.961651	0.933551	0.889046	1	0.950714	1.1248	3.50739e+07	3.556e+07	3.45198e+07	3.28549e+07	3.69555e+07	3.51348e+07	0.821803	0.0448021	3
m.9001	Pmi_542612_G	G6PE_HUMAN_GDH/6PGL_endoplasmic_bifunctional_protein			3.877	0.4867	0.128794	4	3	0	0	6	5	1	4	5	4	0	4	0.923661	0.759027	0.840526	0.745676	0.958161	0.750246	1.28496	1.33878e+06	1.10529e+06	1.22091e+06	1.08372e+06	1.39803e+06	1.08956e+06	0.8216	0.0449011	3
PMI_002467,PMI_019257,m.30038	None,None,Pmi_665534_C	BBG74726.1 beta-catenin [Patiria pectinifera] (id=71.81%; len=706; e=0.00E+00) ,BBG74726.1 beta-catenin [Patiria pectinifera] (id=85.58%; len=763; e=0.00E+00) ,CTNB_TRIGR_Catenin_beta	977	1	4.015	0.5252	0.414198	1	1	0	0	1	1	0	0	1	1	0	0	0.623176	0.503243	0.611232	0.5326	0.854154	1	1.98711	5894.08	4936.9	5854.15	5280.74	8346.82	9889.31	0.821453	0.0449728	3
m.26161	Pmi_653041_E	EI2BD_RAT_Translation_initiation_factor_eIF-2B_subunit_delta			4.87	0.5522	0.032327	5	5	0	5	7	7	1	5	3	3	0	3	0.867972	0.85532	0.982887	0.89776	0.943239	0.920165	1.14915	251591	247739	284007	259947	272847	266324	0.821424	0.0449869	3
PMI_018258,m.19736	None,Pmi_626300_S	XP_002733992.1 PREDICTED: sialic acid synthase-like [Saccoglossus kowalevskii] (id=74.86%; len=350; e=0.00E+00) ,SIAS_HUMAN_Sialic_acid_synthase	351	1	5.43	0.6554	0.026524	15	11	0	10	19	14	0	0	25	15	0	0	0.934397	1	0.93594	0.934427	0.982448	0.976383	1.07021	4.07607e+06	4.36444e+06	4.08498e+06	4.08068e+06	4.28835e+06	4.26101e+06	0.821282	0.0450562	3
m.21530	Pmi_634873_S	SRPK1_PONAB_SRSF_protein_kinase_1			4.066	0.5088	0.1581	6	4	2	0	4	4	2	0	4	4	3	0	0.900289	0.876973	0.939127	1	0.872589	0.892002	1.14601	457428	445779	475606	506357	441033	450855	0.821227	0.045083	3
PMI_012346,PMI_004868		XP_022089488.1 uridine-cytidine kinase-like 1 isoform X2 [Acanthaster planci] (id=77.59%; len=531; e=0.00E+00) ,XP_022089488.1 uridine-cytidine kinase-like 1 isoform X2 [Acanthaster planci] (id=71.04%; len=473; e=0.00E+00)	991	2	5.767	0.6026	0.361782					2	2	0	2	4	2	0	2	0.884254	0.954713	0.835525	0.946941	1	0.8908	1.19685	239754	260712	226761	257379	272391	242499	0.821214	0.0450891	2
PMI_010412		XP_011672056.1 PREDICTED: uncharacterized protein LOC105442030 [Strongylocentrotus purpuratus] (id=41.33%; len=271; e=3.52E-53)			2.13	0.2118	0.021139	1	1	1	0	1	1	1	0	1	1	1	0	0.959546	0.977287	0.868357	0.723006	0.57124	0.549086	1.77984	572120	587088	514789	429075	342094	330663	0.820721	0.0453304	3
PMI_008715		XP_022087369.1 uncharacterized protein LOC110977488 [Acanthaster planci] (id=73.33%; len=300; e=8.41E-142)			5.726	0.6784	0.000412	26	13	1	0	35	11	1	0	32	10	1	0	0.970794	0.869581	0.97122	0.999853	0.858691	0.882483	1.16439	9.59589e+06	8.5493e+06	9.60957e+06	9.88436e+06	8.45145e+06	8.68549e+06	0.820451	0.0454626	3
m.13911,m.28838	19407,Pmi_661771_R	XP_022083005.1 ral GTPase-activating protein subunit alpha-1-like isoform X2 [Acanthaster planci] (id=92.09%; len=594; e=0.00E+00) ,RGPA1_MOUSE_Ral_GTPase-activating_protein_subunit_alpha-1	873	2	5.088	0.5366	0.226601	1	1	0	0	1	1	0	0	2	2	0	2	0.726558	0.811222	0.872353	0.696627	0.741759	0.959594	1.37749	86550.2	94685.3	103940	81096.4	86482.2	115937	0.820327	0.0455233	3
PMI_004058		XP_022088514.1 NAD(P) transhydrogenase, mitochondrial-like [Acanthaster planci] (id=93.74%; len=1070; e=0.00E+00)			6.243	0.6803	0.000379					91	51	1	13	88	49	1	10	0.921265	1	0.912809	0.908859	0.9667	0.991242	1.10028	1.97229e+07	2.1413e+07	1.95737e+07	1.94637e+07	2.06927e+07	2.12242e+07	0.820094	0.0456378	2
m.52406	78146	ACM80366.1 vasa [Patiria miniata] (id=96.18%; len=628; e=0.00E+00)			4.497	0.6801	0.007758	31	19	0	11	47	24	0	12	38	24	0	12	0.933866	0.896091	0.916425	0.902918	0.967185	1	1.11596	1.09678e+07	1.05281e+07	1.07641e+07	1.06052e+07	1.1355e+07	1.17467e+07	0.820084	0.0456426	3
PMI_018473		XP_022109982.1 heterogeneous nuclear ribonucleoproteins A1 homolog isoform X1 [Acanthaster planci] (id=71.10%; len=263; e=7.44E-101)			5.389	0.6661	0.012809	11	6	0	0	34	7	0	0	32	9	0	0	0.930479	0.980353	0.94411	0.892114	0.914558	0.97808	1.09891	1.35102e+07	1.42024e+07	1.36814e+07	1.29423e+07	1.32444e+07	1.41617e+07	0.819986	0.0456908	3
m.19289,m.42370	Pmi_624260_M,63951	MDH_PYRAB_Malate_dehydrogenase,XP_022083653.1 uncharacterized protein LOC110975448 [Acanthaster planci] (id=82.81%; len=384; e=0.00E+00)	1077	3	2.415	0.5322	0.849672	1	1	0	0	1	1	0	0	1	1	0	0	0.946968	0.878724	0.912725	0.914478	0.894128	0.893097	1.07766	56218	51577.1	54226.1	54073.5	52907.9	52994.1	0.819509	0.0459254	3
m.7805,PMI_004500	Pmi_527450_B,None	BL1S2_XENTR_Biogenesis_of_lysosome-related_organelles_compl..CUT,XP_022087468.1 biogenesis of lysosome-related organelles complex 1 subunit 2-like isoform X1 [Acanthaster planci] (id=92.37%; len=118; e=3.11E-68)	107	1	3.109	0.5439	0.591477	1	1	0	0	1	1	0	0	1	1	0	0	0.600485	0.745951	0.770995	0.780404	0.933039	0.971611	1.61804	16888.7	20920.9	21583	21810.7	25706	26618.1	0.819396	0.0459814	3
PMI_002927,m.8047	None,Pmi_530310_R	XP_022093230.1 40S ribosomal protein S12-like [Acanthaster planci] (id=91.55%; len=142; e=1.15E-82) ,RS12_CHICK_40S_ribosomal_protein_S12	1926	12	6.942	0.7066	0.002262	37	12	0	7	58	13	0	8	50	12	0	8	0.941032	0.928089	0.937588	0.819264	0.997903	0.872531	1.21805	1.78657e+07	1.76237e+07	1.78094e+07	1.5538e+07	1.89613e+07	1.65495e+07	0.819385	0.0459865	3
m.41225,PMI_024520,m.11807,PMI_021047	62387,None,Pmi_574060_R,None	XP_022083400.1 28S ribosomal protein S28, mitochondrial-like [Acanthaster planci] (id=74.62%; len=197; e=9.76E-104) ,XP_022083400.1 28S ribosomal protein S28, mitochondrial-like [Acanthaster planci] (id=76.38%; len=199; e=6.47E-108) ,RT28_BOVIN_28S_ribosomal_protein_S28,_mitochondrial,XP_022083400.1 28S ribosomal protein S28, mitochondrial-like [Acanthaster planci] (id=75.38%; len=199; e=3.03E-10…	857	2	3.432	0.4875	0.541774	1	1	0	0	2	2	0	0	1	1	0	0	0.788217	0.907431	0.989972	0.868029	0.927395	0.904264	1.25596	163947	188590	206658	180496	192504	188145	0.819206	0.0460747	3
PMI_013457		XP_022094831.1 CAAX prenyl protease 1 homolog [Acanthaster planci] (id=88.68%; len=371; e=0.00E+00)			6.257	0.5907	0.135991	6	5	1	1	6	4	1	0	9	7	2	0	0.877802	0.905136	0.952243	0.989089	0.925688	0.983136	1.12678	1.57032e+06	1.61527e+06	1.70254e+06	1.77089e+06	1.65636e+06	1.75771e+06	0.819177	0.0460891	3
PMI_009267		XP_022081863.1 3-hydroxybutyrate dehydrogenase type 2-like [Acanthaster planci] (id=86.84%; len=152; e=7.18E-91)			3.756	0.56	0.075262	9	6	2	0	5	4	2	0	6	5	2	0	0.921907	0.965578	0.928685	0.976259	0.910982	0.970834	1.07166	1.01332e+06	1.06116e+06	1.02149e+06	1.07388e+06	1.00226e+06	1.06818e+06	0.819072	0.0461413	3
m.13054,m.17578,m.13057	18508,Pmi_615330_Y,18509	XP_022090122.1 uncharacterized protein LOC110979000 [Acanthaster planci] (id=79.76%; len=252; e=1.11E-149) ,YRBE_BACSU_Uncharacterized_oxidoreductase_YrbE,XP_022090122.1 uncharacterized protein LOC110979000 [Acanthaster planci] (id=79.60%; len=348; e=0.00E+00)	969	2	2.193	0.2853	1.52566	2	2	0	0					1	1	0	0	0.890856	0.991625	0.937314	0.913513	0.997642	0.96129	1.11987	84976.2	94631.7	89444.4	87148.9	95191.5	91686.7	0.818925	0.0462136	2
PMI_003614		XP_022094928.1 protein PRRC2C-like [Acanthaster planci] (id=70.87%; len=2551; e=0.00E+00)			4.987	0.6385	0.009267	22	18	1	15	31	24	3	16	25	20	0	18	0.695451	1	0.766943	0.695452	0.877862	0.883885	1.43792	3.21944e+06	4.39637e+06	3.51831e+06	3.29444e+06	3.96503e+06	4.0099e+06	0.818889	0.0462315	3
m.40544,m.13751	61208,Pmi_589801_S	XP_022084930.1 sodium-dependent multivitamin transporter-like isoform X3 [Acanthaster planci] (id=84.72%; len=229; e=4.90E-122) ,SC5A6_RABIT_Sodium-dependent_multivitamin_transporter	1418	1	3.131	0.5417	0.157828	1	1	0	0	2	1	0	0	1	1	0	0	0.518923	1	0.603514	0.444694	0.819425	0.799145	2.24874	30087.9	57495.7	34959.5	25311.2	46856.2	46116	0.81854	0.046404	3
m.46121	69158	XP_022107272.1 ubiquitin-conjugating enzyme E2 N [Acanthaster planci] (id=91.22%; len=148; e=4.16E-98)			5.016	0.682	0.026977	9	5	2	2	16	6	3	2	19	9	3	5	0.865411	0.916952	0.927734	0.872032	0.999669	0.926287	1.15514	4.63855e+06	4.92124e+06	4.98863e+06	4.68466e+06	5.38584e+06	4.97316e+06	0.818403	0.0464718	3
m.31173	Pmi_668761_C	CBL_MOUSE_E3_ubiquitin-protein_ligase_CBL			4.571	0.6032	0.025001	7	5	3	2	8	6	5	1	10	9	4	2	0.978093	0.956735	0.870509	0.820726	0.896789	0.986863	1.20243	270945	264973	240697	226183	248267	272574	0.818293	0.0465265	3
m.20297	Pmi_629070_T	TRPG_DROME_Transient_receptor_potential-gamma_protein			5.256	0.5921	0.019328	9	6	0	6	11	9	0	9	8	8	0	8	1	0.900511	0.812767	0.846969	0.801127	0.810541	1.24824	1.00148e+06	900585	810459	842264	795794	806851	0.818263	0.0465413	3
m.5392,m.11083,PMI_020038	9038,Pmi_567020_B,None	XP_022096462.1 b(0,+)-type amino acid transporter 1-like isoform X1 [Acanthaster planci] (id=81.46%; len=151; e=8.94E-82) ,BAT1_HUMAN_B(0,+)-type_amino_acid_transporter_1,XP_022096462.1 b(0,+)-type amino acid transporter 1-like isoform X1 [Acanthaster planci] (id=83.33%; len=276; e=7.22E-163)	901	2	2.601	0.312	0.438201					2	1	0	0	3	2	0	0	0.761349	0.956083	0.851129	0.775041	0.827476	0.984241	1.29276	151803	190695	169632	154439	164936	196200	0.818215	0.046565	2
PMI_002345,PMI_016623		XP_022093943.1 casein kinase I-like isoform X1 [Acanthaster planci] (id=84.81%; len=79; e=2.24E-37) ,XP_022093943.1 casein kinase I-like isoform X1 [Acanthaster planci] (id=84.81%; len=79; e=1.05E-38)	2548	2	3.168	0.5161	0.103886	2	2	0	0	3	3	0	0	2	2	0	0	0.736564	0.884054	0.885837	0.954953	0.8865	0.926037	1.2965	134377	162085	162417	175008	161442	169403	0.817891	0.0467259	3
PMI_009362		XP_022081898.1 SH3 domain-containing kinase-binding protein 1-like isoform X3 [Acanthaster planci] (id=64.64%; len=444; e=6.03E-180)			4.941	0.5848	0.091644	14	12	2	0	16	14	4	0	22	16	4	0	0.924456	0.918155	0.872222	0.839043	0.931743	0.970692	1.1569	3.21259e+06	3.18164e+06	3.02764e+06	2.90484e+06	3.2294e+06	3.35998e+06	0.817752	0.0467951	3
m.16371,PMI_000820,m.43829,m.43830,PMI_021507	Pmi_607820_N,None,65885,65888,None	NXNL2_MOUSE_Nucleoredoxin-like_protein_2,XP_022087942.1 nucleoredoxin-like protein 2 [Acanthaster planci] (id=80.27%; len=147; e=3.90E-85) ,XP_022087942.1 nucleoredoxin-like protein 2 [Acanthaster planci] (id=79.59%; len=147; e=8.90E-84) ,XP_022087942.1 nucleoredoxin-like protein 2 [Acanthaster planci] (id=80.27%; len=147; e=4.36E-85) ,XP_022087942.1 nucleoredoxin-like protein 2 [Acanthaster plan…	2213	4	4.471	0.5526	0.124933	6	3	0	0	6	3	0	0	6	4	0	0	0.839233	0.961819	0.928888	0.964786	0.990613	0.987522	1.18038	1.15711e+06	1.32482e+06	1.27939e+06	1.32897e+06	1.36493e+06	1.361e+06	0.817527	0.0469069	3
m.56573	84484	XP_022105243.1 betaine--homocysteine S-methyltransferase 1-like [Acanthaster planci] (id=91.77%; len=401; e=0.00E+00)			6.879	0.7004	0.000988	89	24	0	20	155	23	0	2	139	25	0	21	0.868896	0.991311	0.89209	0.840173	0.98359	0.981411	1.17989	7.25915e+07	8.28155e+07	7.4533e+07	7.01722e+07	8.21629e+07	8.19872e+07	0.817396	0.0469722	3
m.25586	36880	XP_022110027.1 high mobility group protein HMGI-C-like [Acanthaster planci] (id=57.76%; len=116; e=2.76E-08)			4.569	0.5707	0.052978	10	3	0	0	31	7	1	6	28	7	1	6	0.87035	0.94499	0.857728	0.802825	0.957369	0.980975	1.2219	1.61309e+07	1.74821e+07	1.5891e+07	1.48985e+07	1.7628e+07	1.81366e+07	0.817214	0.0470625	3
m.29412	43698	XP_022097393.1 uncharacterized protein LOC110982916 [Acanthaster planci] (id=87.34%; len=229; e=5.49E-146)			4.336	0.5818	0.039153	3	3	2	1	9	6	2	2	9	7	2	4	0.963545	0.958316	0.945241	0.948491	0.968517	0.969678	1.02585	3.78438e+06	3.75398e+06	3.70814e+06	3.72172e+06	3.79432e+06	3.79709e+06	0.817132	0.0471035	3
PMI_026720		XP_022102237.1 ependymin-related protein 1-like [Acanthaster planci] (id=63.59%; len=195; e=2.14E-77)			2.768	0.3142	0.104515	1	1	0	0	1	1	0	0	2	2	1	1	0.683395	0.932725	0.847354	0.681536	1	0.838753	1.46727	59052.2	80190.1	72954.3	58750.3	86030.6	72084.4	0.817011	0.0471636	3
PMI_028669		XP_022085761.1 bolA-like protein 2 [Acanthaster planci] (id=84.88%; len=86; e=3.95E-48)			5.604	0.6401	0.063688	6	5	2	0	8	6	2	3	9	6	2	3	0.937052	0.918992	0.937373	1	0.892617	0.926726	1.1203	868971	851824	869408	926884	827623	860147	0.81701	0.0471643	3
PMI_005580		XP_022108407.1 uncharacterized protein LOC110988832 [Acanthaster planci] (id=64.90%; len=960; e=0.00E+00)			7.055	0.7025	0.002155	227	43	4	0	357	56	4	0	339	53	4	0	0.910938	0.987511	0.933605	0.925966	1	0.949686	1.09777	2.40841e+08	2.61148e+08	2.46835e+08	2.44821e+08	2.64451e+08	2.50999e+08	0.816451	0.0474436	3
PMI_022741		XP_022094082.1 DNA-binding protein SMUBP-2-like [Acanthaster planci] (id=77.54%; len=423; e=0.00E+00)			2.379	0.2131	1.10308	1	1	1	0					1	1	1	0	0.446575	0.863975	0.52021	0.424212	0.948379	0.861744	2.23563	1675.38	3160.56	2574.5	1453.38	3379.52	3314.09	0.816241	0.0475484	2
m.37484,PMI_019219,m.24246	56669,None,Pmi_645791_N	XP_022091744.1 nucleoporin NUP53-like isoform X1 [Acanthaster planci] (id=85.05%; len=368; e=0.00E+00) ,XP_022091744.1 nucleoporin NUP53-like isoform X1 [Acanthaster planci] (id=60.37%; len=376; e=4.49E-122) ,NUP53_DANRE_Nucleoporin_NUP53	2300	4	2.926	0.4125	0.156951	1	1	0	0	3	3	0	0	1	1	0	0	0.78244	0.476467	0.440951	0.917303	0.729835	0.979528	2.2214	103575	58450.9	54773.7	121501	94761	131835	0.816204	0.0475672	3
PMI_027571		XP_022109893.1 erythrocyte band 7 integral membrane protein-like [Acanthaster planci] (id=63.84%; len=271; e=1.22E-86)			4.5	0.6514	0.014237	20	6	0	2	20	5	0	0	15	6	0	1	0.992072	0.789451	0.934836	0.948708	0.794886	0.805957	1.25666	3.92735e+06	3.12089e+06	3.70004e+06	3.75137e+06	3.14732e+06	3.19328e+06	0.816117	0.0476107	3
m.18244	Pmi_618770_L	LRC43_MOUSE_Leucine-rich_repeat-containing_protein_43			3.244	0.3758	0.19243	2	2	2	0	1	1	1	0	2	2	2	0	0.901393	0.832786	0.990467	0.963422	0.854833	0.878354	1.18934	209358	193225	229232	223839	197816	202646	0.816021	0.0476587	3
m.26066	Pmi_652830_T	TTC18_MACFA_Tetratricopeptide_repeat_protein_18			4.264	0.4958	0.014953	10	10	4	6	8	8	4	4	7	5	1	4	0.846562	0.913544	0.902974	0.882516	0.944274	1	1.18125	488704	527899	521460	509500	545380	577650	0.815845	0.047747	3
PMI_014188		XP_022105312.1 protein max-like [Acanthaster planci] (id=80.84%; len=167; e=5.74E-81)			2.347	0.3941	0.314777	2	1	1	0	1	1	1	0	2	1	1	0	0.536975	0.773751	0.88235	0.613105	0.662001	0.735375	1.64319	7869.95	14055	16826.4	9985.77	8641.83	12488.5	0.815798	0.0477703	3
m.53643	79901	XP_022103565.1 X-ray repair cross-complementing protein 5-like [Acanthaster planci] (id=86.18%; len=340; e=0.00E+00)			5.88	0.6179	0.036862	23	15	0	13	20	14	2	10	20	15	1	12	0.872702	0.948808	0.912468	0.923539	0.942206	1	1.14587	2.10891e+06	2.29779e+06	2.20369e+06	2.23464e+06	2.27927e+06	2.42465e+06	0.814375	0.0484868	3
m.17067	Pmi_612150_C	CAT2_CLOK5_4-hydroxybutyrate_coenzyme_A_transferase			5.241	0.6023	0.019859	10	6	0	5	17	10	0	9	16	10	0	9	0.884775	0.905263	0.855036	0.87009	0.941707	1	1.16954	2.26107e+06	2.31494e+06	2.18583e+06	2.22354e+06	2.40723e+06	2.55468e+06	0.814315	0.0485174	3
m.28010,PMI_006835	41082,None	XP_022091215.1 39S ribosomal protein L53, mitochondrial-like, partial [Acanthaster planci] (id=76.84%; len=95; e=7.64E-51) ,XP_022091215.1 39S ribosomal protein L53, mitochondrial-like, partial [Acanthaster planci] (id=79.66%; len=59; e=2.56E-29)	514	4	4.76	0.621	0.126331	1	1	0	0	2	2	0	0	5	4	0	0	0.825267	0.84217	0.881313	0.968654	0.789637	0.870439	1.22671	98280.3	99095.9	105848	115354	92184.9	102134	0.813764	0.0487962	3
PMI_015428		XP_022106517.1 bromodomain adjacent to zinc finger domain protein 2B-like isoform X9 [Acanthaster planci] (id=78.99%; len=1109; e=0.00E+00)			2.898	0.4502	0.042027	4	3	0	3	4	4	0	4	1	1	0	0	0.624458	0.852357	0.66353	0.87169	0.793504	1	1.60139	38603.5	53399.5	40897	54170	49483.1	62634.7	0.813729	0.0488139	3
PMI_002219		XP_022094646.1 inosine-uridine preferring nucleoside hydrolase-like isoform X3 [Acanthaster planci] (id=73.90%; len=318; e=1.53E-172)			5.216	0.504	0.015695					4	4	1	2	8	6	1	5	0.919434	0.784572	0.927963	1	0.842557	0.812031	1.27458	688901	585792	695505	746920	628934	606663	0.813319	0.0490219	2
PMI_012271,PMI_014184		XP_022105322.1 N-alpha-acetyltransferase 20-like [Acanthaster planci] (id=96.57%; len=175; e=4.28E-125) ,XP_022105322.1 N-alpha-acetyltransferase 20-like [Acanthaster planci] (id=87.92%; len=149; e=1.53E-90)	2488	1	2.185	0.3469	0.17227					2	1	0	0	1	1	0	0	0.794572	0.790343	0.861191	0.988047	0.991586	0.896469	1.25463	134286	133519	145470	166887	167459	151499	0.813276	0.0490436	2
m.12274	Pmi_577610_I	ICA69_MOUSE_Islet_cell_autoantigen_1			4.105	0.5491	0.103169	1	1	1	0	2	2	0	2	3	3	0	0	0.878309	0.902037	0.893612	0.898572	0.913979	0.870624	1.0498	47584.2	48781	48408.2	48573.5	49250.6	46705.5	0.812787	0.049292	3
m.55268,m.10458,PMI_004902	82271,Pmi_559561_B,None	XP_022110222.1 ribosome biogenesis protein BMS1 homolog [Acanthaster planci] (id=78.29%; len=1262; e=0.00E+00) ,BMS1_HUMAN_Ribosome_biogenesis_protein_BMS1_homolog,XP_022110222.1 ribosome biogenesis protein BMS1 homolog [Acanthaster planci] (id=77.19%; len=1394; e=0.00E+00)	1234	1	2.599	0.3117	0.606856					1	1	0	0	1	1	0	0	0.896552	0.95596	0.77164	0.91964	0.993435	0.953479	1.28743	23564.7	25230.7	20261	24138.1	26184.1	25012.1	0.812629	0.0493726	2
m.51184	76638	XP_022099450.1 uncharacterized protein LOC110983997 [Acanthaster planci] (id=40.58%; len=138; e=2.25E-23)			5.458	0.7354	0.002976	90	15	0	0	136	14	0	0	151	15	1	0	0.981294	0.95966	0.976068	0.987764	0.952494	0.976951	1.03703	1.97655e+08	1.93308e+08	1.96579e+08	1.98941e+08	1.91816e+08	1.96744e+08	0.812538	0.049419	3
PMI_000395		AHN19767.1 dysferlin [Patiria miniata] (id=91.89%; len=1220; e=0.00E+00)			6.554	0.6992	0.008029	94	52	0	44	158	59	1	4	152	71	1	5	0.985781	0.975504	0.998439	0.969062	0.955201	0.998767	1.04561	3.39221e+07	3.35568e+07	3.43565e+07	3.33389e+07	3.28652e+07	3.43685e+07	0.812235	0.0495739	3
PMI_024034		XP_022081282.1 ruvB-like 1 [Acanthaster planci] (id=87.95%; len=498; e=0.00E+00)			5.612	0.6843	0.016474	29	16	0	12	46	21	0	15	37	21	0	16	0.909807	0.985139	0.928044	0.922526	0.970511	0.997859	1.09678	8.41035e+06	9.09385e+06	8.56689e+06	8.51395e+06	8.96061e+06	9.21637e+06	0.812006	0.0496907	3
PMI_024307		XP_022107064.1 4-trimethylaminobutyraldehyde dehydrogenase-like [Acanthaster planci] (id=85.50%; len=262; e=2.59E-156)			7.219	0.7271	0.014251	18	10	0	8	18	10	0	7	18	8	0	0	0.917254	0.990717	0.950311	0.89331	0.986924	0.976486	1.10904	5.61187e+06	6.05073e+06	5.81761e+06	5.46259e+06	6.02998e+06	5.97115e+06	0.811762	0.0498152	3
PMI_013496		XP_022110742.1 uncharacterized protein LOC110990185 isoform X1 [Acanthaster planci] (id=61.83%; len=317; e=8.06E-131)			4.107	0.5995	0.069214					2	2	0	2	1	1	0	0	0.350245	0.516215	0.402328	0.419413	1	0.505169	2.85514	41330	61618	44796.7	54868.2	154396	59517	0.81155	0.049924	2
PMI_006720,PMI_022728,m.27126	None,None,Pmi_656112_T	XP_022101461.1 ER membrane protein complex subunit 2-like isoform X1 [Acanthaster planci] (id=82.45%; len=302; e=8.13E-177) ,XP_022101461.1 ER membrane protein complex subunit 2-like isoform X1 [Acanthaster planci] (id=82.35%; len=289; e=3.62E-170) ,TTC35_DANRE_Tetratricopeptide_repeat_protein_35	2035	10	4.758	0.6255	0.054188	4	4	0	2	7	6	0	5	7	7	0	3	0.919537	0.939669	0.934407	0.910989	0.943714	0.949228	1.04198	730763	746536	742481	723928	748856	754133	0.81144	0.0499802	3
PMI_021363		XP_022098471.1 nodal modulator 1-like [Acanthaster planci] (id=76.73%; len=593; e=0.00E+00)			4.271	0.6271	0.040036	17	11	1	0	19	12	1	0					0.942627	0.954326	0.916749	1	0.931083	0.932911	1.09081	2.61477e+06	2.64706e+06	2.54314e+06	2.77352e+06	2.58304e+06	2.58776e+06	0.811077	0.0501663	2
m.50942	76353	XP_022111323.1 steroid 17-alpha-hydroxylase/17,20 lyase-like isoform X2 [Acanthaster planci] (id=83.25%; len=191; e=2.18E-114)			4.277	0.6046	0.039685	9	6	0	5	15	10	0	6	16	9	0	5	0.849919	0.982706	0.875812	0.914922	0.962177	0.986995	1.16128	1.86388e+06	2.15421e+06	1.92179e+06	2.00528e+06	2.10861e+06	2.16706e+06	0.810832	0.0502923	3
m.13365	Pmi_586941_S	S20A2_XENLA_Sodium-dependent_phosphate_transporter_2			3.866	0.5501	0.048587	5	4	1	3	6	5	1	4	1	1	0	0	0.807454	0.906506	0.859738	0.717772	0.938752	0.990415	1.37985	90218.2	100893	95914.1	79523.8	104744	110570	0.810509	0.0504581	3
m.46327,m.46318	69377,69373	OJX66196.1 hypothetical protein BGO94_04630 [Micrococcales bacterium 72-143] (id=30.43%; len=69; e=5.10E+00) ,69373|g.46318 type:internal len:105 gc:universal 69373:2-313(+)	227	1	2.243	0.2743	0.216418	1	1	0	0	1	1	0	0	1	1	0	0	0.902333	0.877475	0.910673	0.924487	0.811751	0.888035	1.13888	312720	305217	316343	320023	280964	308844	0.81034	0.0505452	3
m.26055	Pmi_652791_T	TM177_MOUSE_Transmembrane_protein_177			3.083	0.4175	0.683752	1	1	1	0	3	3	3	0	3	3	3	0	0.755879	0.758259	0.851812	0.890586	0.976182	0.900998	1.29145	314625	302992	362901	382270	417503	374322	0.810037	0.0507012	3
m.48498,PMI_010707	72509,None	XP_022109881.1 isochorismatase domain-containing protein 1-like isoform X1 [Acanthaster planci] (id=91.96%; len=199; e=4.13E-132) ,XP_022109881.1 isochorismatase domain-containing protein 1-like isoform X1 [Acanthaster planci] (id=93.47%; len=199; e=4.03E-135)	1130	8	4.761	0.6516	0.033288	16	9	0	7	20	10	0	7	19	8	0	0	0.921704	0.955081	0.909385	0.911712	1	0.969164	1.09964	7.09283e+06	7.34696e+06	6.99654e+06	7.01526e+06	7.6949e+06	7.45574e+06	0.810003	0.050719	3
PMI_016276		XP_022110097.1 solute carrier family 12 member 4-like isoform X2 [Acanthaster planci] (id=91.61%; len=1037; e=0.00E+00)			2.96	0.3999	0.055688	1	1	0	0	2	2	0	2	2	2	0	2	0.818211	0.822237	0.836127	0.889987	0.99489	0.986984	1.21593	72025	72266.1	72977.9	78533.8	88400.6	87594.6	0.809677	0.0508872	3
m.19672	Pmi_626071_P	PHYD1_DANRE_Phytanoyl-CoA_dioxygenase_domain-containing_p..CUT			2.949	0.4918	0.210723	1	1	1	0	1	1	1	0					0.894212	1	0.712104	0.860488	0.992988	0.931448	1.40429	64464.1	74334.6	51596.1	62429.7	73949.2	68892.1	0.809005	0.0512351	2
m.31058	Pmi_668321_A	ARHGC_HUMAN_Rho_guanine_nucleotide_exchange_factor_12			4.112	0.536	0.037178	3	3	0	3	6	6	0	6	6	6	0	6	0.824836	0.888154	0.8889	0.911002	0.96519	0.986154	1.19558	122103	131570	131438	135210	143011	146142	0.808814	0.051334	3
PMI_011977		XP_022100832.1 basigin-like isoform X3 [Acanthaster planci] (id=64.44%; len=90; e=6.55E-26)			3.745	0.5363	0.081669	6	4	1	1	6	4	1	1					0.954319	0.961961	0.942808	0.791569	0.940473	0.983573	1.24256	2.22372e+06	2.24042e+06	2.19686e+06	1.84436e+06	2.19245e+06	2.29252e+06	0.808641	0.051424	2
m.43935,m.25016	66012,Pmi_649000_H	XP_022103652.1 heat shock protein 83-like [Acanthaster planci] (id=91.06%; len=727; e=0.00E+00) ,HS90A_CHICK_Heat_shock_protein_HSP_90-alpha	1740	64	5.62	0.6761	0.000219	158	65	0	12	242	68	0	14	249	78	0	14	0.997268	0.944017	0.975135	0.95587	0.975029	0.976235	1.05641	1.01681e+08	9.62391e+07	9.94308e+07	9.74597e+07	9.94129e+07	9.95352e+07	0.808567	0.0514621	3
m.26988	Background_P	CUBN_MOUSE_Cubilin			5.653	0.6963	0.003008	88	37	0	17	187	48	0	19	162	45	0	18	0.947791	0.962988	0.98506	0.945126	0.964149	0.983925	1.04225	7.50595e+07	7.63749e+07	7.81449e+07	7.5032e+07	7.64374e+07	7.79966e+07	0.808253	0.0516254	3
m.29307	43505	XP_022083216.1 serine/arginine-rich splicing factor 6-like isoform X2 [Acanthaster planci] (id=89.36%; len=188; e=3.90E-120)			5.867	0.6658	0.022756	16	11	1	10	14	9	1	8	16	11	1	2	0.950054	0.897894	0.967474	0.965898	0.978594	1	1.11372	3.39734e+06	3.21809e+06	3.46266e+06	3.45855e+06	3.50329e+06	3.5816e+06	0.807936	0.0517902	3
PMI_026209		XP_022084125.1 uncharacterized protein LOC110975718 [Acanthaster planci] (id=54.07%; len=405; e=2.82E-120)			2.015	0.1916	0.054165	1	1	0	0	1	1	0	0	1	1	1	0	0.847044	0.673614	0.555153	0.824954	0.563357	0.618473	1.52578	135008	106030	95308.8	147240	93266.1	104326	0.807874	0.0518226	3
PMI_019152,m.30519	None,Pmi_667013_C	XP_022109311.1 calpain-7-like isoform X1 [Acanthaster planci] (id=84.41%; len=667; e=0.00E+00) ,CAN7_MOUSE_Calpain-7	860	2	2.119	0.3564	1.36746					1	1	0	0	1	1	0	0	0.784645	0.888195	0.664438	0.898106	1	0.882921	1.50503	18707.3	21034.1	15688.1	21289.5	23898.8	20970.3	0.807629	0.0519503	2
PMI_010026		XP_022102938.1 titin-like [Acanthaster planci] (id=56.14%; len=2811; e=0.00E+00)			2.567	0.3087	0.246646	2	2	0	2	1	1	0	0	2	2	0	2	0.833711	0.837411	0.85416	0.910418	0.703794	0.651469	1.39748	249650	242472	254509	288857	190687	177749	0.80733	0.0521067	3
m.52460,PMI_016489,PMI_003156,m.30454	78231,None,None,Pmi_666831_T	XP_022104515.1 transmembrane 9 superfamily member 1-like [Acanthaster planci] (id=93.62%; len=580; e=0.00E+00) ,XP_022104515.1 transmembrane 9 superfamily member 1-like [Acanthaster planci] (id=92.79%; len=527; e=0.00E+00) ,XP_022104515.1 transmembrane 9 superfamily member 1-like [Acanthaster planci] (id=93.42%; len=593; e=0.00E+00) ,TM9S1_MOUSE_Transmembrane_9_superfamily_member_1	1626	4	3.369	0.461	0.253264	3	3	0	0	7	4	0	0	3	3	0	0	0.96142	0.970788	0.964757	0.948688	0.96618	0.897816	1.08128	484046	488232	484164	476312	486544	451716	0.80722	0.0521638	3
m.22961	Pmi_641090_T	TM9S2_RAT_Transmembrane_9_superfamily_member_2			4.846	0.6401	0.032092	16	14	1	13	24	14	1	12	23	14	1	12	0.88015	0.826807	0.967658	0.974258	0.860945	0.840698	1.17834	3.79534e+06	3.56236e+06	4.18308e+06	4.20769e+06	3.7109e+06	3.62648e+06	0.807183	0.0521835	3
m.25418	Pmi_650390_D	DDX4_BOVIN_Probable_ATP-dependent_RNA_helicase_DDX4			4.497	0.6801	0.007758	28	18	0	10	43	23	0	11	37	23	0	11	0.935106	0.898655	0.918424	0.90543	0.966536	1	1.11277	1.10543e+07	1.06269e+07	1.08576e+07	1.0704e+07	1.14216e+07	1.18228e+07	0.807079	0.0522374	3
m.25924	Pmi_652201_E	EI3EA_XENLA_Eukaryotic_translation_initiation_factor_3_s..CUT			7.079	0.7107	0.001466	20	10	0	5	27	9	0	4	29	10	0	4	0.894625	0.964545	0.973709	0.89984	0.947451	0.989838	1.10643	5.51844e+06	5.95172e+06	6.01149e+06	5.5577e+06	5.84673e+06	6.11238e+06	0.806973	0.0522929	3
m.32931	49194	XP_022098819.1 uncharacterized protein LOC110983679 isoform X1 [Acanthaster planci] (id=92.59%; len=189; e=5.57E-120)			3.474	0.4229	0.070589	4	2	1	1	5	1	1	0	7	2	1	1	0.661376	0.960905	0.696586	0.562931	0.905538	0.90346	1.70697	991313	1.45162e+06	1.03965e+06	846631	1.36455e+06	1.36213e+06	0.806886	0.0523387	3
m.18263,PMI_009832	Background_P,None	DCTD_PONAB_Deoxycytidylate_deaminase,XP_022090346.1 nuclease-sensitive element-binding protein 1-like [Acanthaster planci] (id=80.64%; len=279; e=1.19E-89)	1750	31	6.442	0.6755	0.004356	76	27	0	7	117	27	0	9	102	28	0	8	0.996516	0.973508	0.931387	0.889201	0.913668	0.88023	1.13211	2.02328e+07	1.97642e+07	1.89071e+07	1.80538e+07	1.85513e+07	1.78637e+07	0.806742	0.052414	3
m.37945	57402	XP_022082467.1 group XV phospholipase A2-like [Acanthaster planci] (id=81.66%; len=278; e=5.82E-173)			3.539	0.516	0.117478	3	3	1	2	1	1	0	0	3	3	2	0	0.858491	0.917663	0.903298	0.913774	0.957596	0.92442	1.11544	386118	413728	407428	412883	431932	417888	0.806345	0.0526223	3
PMI_001427		XP_022092963.1 eIF-2-alpha kinase GCN2-like isoform X1 [Acanthaster planci] (id=78.50%; len=1158; e=0.00E+00)			3.85	0.4947	0.026285	5	5	2	3	7	6	3	3	6	6	3	3	0.910232	0.949483	0.970453	0.935241	0.982456	0.947128	1.07935	1.10215e+06	1.14883e+06	1.1746e+06	1.13272e+06	1.18954e+06	1.14618e+06	0.806325	0.0526324	3
PMI_002880,m.20490	None,Pmi_630022_G	XP_022089573.1 Golgi-specific brefeldin A-resistance guanine nucleotide exchange factor 1-like [Acanthaster planci] (id=84.33%; len=632; e=0.00E+00) ,GBF1_CRIGR_Golgi-specific_brefeldin_A-resistance_guanine_n..CUT	1615	1	2.307	0.287	1.07834					1	1	0	0	1	1	0	0	0.805516	0.8839	0.866741	0.999064	0.962206	0.976372	1.24028	65921.8	72315.5	70952.5	81759.9	78756.1	79887.3	0.806273	0.0526597	2
PMI_026112		XP_022084647.1 multiple epidermal growth factor-like domains protein 6 [Acanthaster planci] (id=78.85%; len=1806; e=0.00E+00)			7.476	0.7897	0.000659	303	79	4	0	437	82	4	1	414	83	6	0	0.983287	0.974971	0.944843	0.954118	0.907303	0.961015	1.08375	1.03618e+08	1.02572e+08	9.93897e+07	1.00219e+08	9.54294e+07	1.01105e+08	0.806259	0.0526671	3
m.23017,PMI_016584	Pmi_641270_R,None	RU17_XENTR_U1_small_nuclear_ribonucleoprotein_70_kDa,XP_022098165.1 U1 small nuclear ribonucleoprotein 70 kDa-like isoform X1 [Acanthaster planci] (id=90.06%; len=181; e=1.47E-80)	688	7	3.78	0.4783	0.326081	7	6	0	5	2	2	0	2	3	3	0	3	0.845526	0.827224	0.938109	0.880829	0.943346	0.93832	1.14038	129938	126947	144608	135590	143755	142756	0.806205	0.0526959	3
PMI_024187,m.48501	None,72512	XP_022109884.1 complexin-2-like [Acanthaster planci] (id=72.88%; len=118; e=7.71E-41) ,XP_022109884.1 complexin-2-like [Acanthaster planci] (id=72.88%; len=118; e=2.72E-41)	1764	4	2.905	0.4028	0.154614	3	2	0	0	4	4	0	0	3	2	0	0	0.89323	0.899203	0.920667	0.886303	0.997908	0.93045	1.12592	519220	522619	535089	515059	579991	540840	0.805927	0.0528415	3
m.26986	Pmi_655822_C	CUBN_RAT_Cubilin			6.972	0.7325	0.001935	106	34	1	0	143	38	3	0	144	37	2	0	0.972952	0.91196	1	0.956901	0.968188	0.951064	1.09654	4.63405e+07	4.34175e+07	4.76327e+07	4.55638e+07	4.60988e+07	4.52922e+07	0.805897	0.0528576	3
m.38250,m.21424,m.38252	57824,Pmi_634360_C,57828	XP_022089121.1 cyclin-dependent kinase inhibitor 3-like isoform X1 [Acanthaster planci] (id=81.01%; len=237; e=1.31E-140) ,CDKN3_HUMAN_Cyclin-dependent_kinase_inhibitor_3,XP_022089121.1 cyclin-dependent kinase inhibitor 3-like isoform X1 [Acanthaster planci] (id=80.59%; len=237; e=2.99E-140)	1842	11	6.277	0.593	0.192433	11	7	0	3	12	8	0	4	11	9	0	6	0.87809	0.946305	0.873486	0.923971	0.964085	0.949153	1.10372	793443	852922	789965	835354	870494	856927	0.805766	0.0529264	3
PMI_018355		XP_022108679.1 mucin-12-like [Acanthaster planci] (id=58.92%; len=701; e=0.00E+00)			1.916	0.2238	1.24682	1	1	1	0	1	1	1	0	1	1	1	0	0.802388	0.908332	0.921973	0.917945	0.742915	0.82315	1.24102	205111	222678	231586	231476	183774	203416	0.805561	0.0530342	3
PMI_009491,PMI_021341,m.18566	None,None,Pmi_620560_M	XP_022080728.1 macrophage erythroblast attacher-like [Acanthaster planci] (id=84.93%; len=438; e=0.00E+00) ,XP_022080728.1 macrophage erythroblast attacher-like [Acanthaster planci] (id=95.25%; len=379; e=0.00E+00) ,MAEA_DANRE_Macrophage_erythroblast_attacher	1813	1	2.099	0.2749	0.015479	1	1	0	0	1	1	0	0	2	1	0	0	0.780109	0.8667	0.83683	0.63305	0.992735	0.977266	1.56818	458298	506194	488928	370569	583728	573872	0.805222	0.0532128	3
m.14777	Pmi_597110_B	BHMT1_XENTR_Betaine--homocysteine_S-methyltransferase_1			5.557	0.6783	0.00712	22	14	1	12	29	16	1	13	26	16	1	13	0.930725	0.994613	0.942261	0.927883	0.975982	0.989004	1.07192	6.02602e+06	6.43232e+06	6.09892e+06	6.00932e+06	6.31324e+06	6.39569e+06	0.805159	0.0532461	3
PMI_022398		XP_022111180.1 tetratricopeptide repeat protein 25-like isoform X1 [Acanthaster planci] (id=92.41%; len=303; e=0.00E+00)			4.24	0.6104	0.007121	8	7	2	0	8	8	4	0	9	9	4	0	0.799148	0.929442	0.92759	0.963191	0.889233	0.893353	1.20527	465829	541305	543941	563743	515242	517748	0.805144	0.0532541	3
m.29608	44034	XP_022085878.1 uncharacterized protein LOC110976693 [Acanthaster planci] (id=89.12%; len=377; e=0.00E+00)			4.682	0.5637	0.234	9	9	0	8	10	9	0	8	9	7	0	6	0.845285	0.964973	0.90801	0.916062	0.994148	0.965109	1.17611	495125	565360	535108	541123	585825	567941	0.804851	0.053409	3
PMI_001769,PMI_012367		BAB79497.1 Cdc25 [Patiria pectinifera] (id=97.94%; len=583; e=0.00E+00) ,BAB79497.1 Cdc25 [Patiria pectinifera] (id=97.60%; len=583; e=0.00E+00)	2341	4	2.722	0.3995	0.711631	1	1	0	0	3	3	0	2	2	2	0	1	0.906255	0.981043	0.914853	0.914262	0.932423	0.937449	1.08252	326980	354399	330031	330903	336771	339298	0.804822	0.0534243	3
m.22428	Pmi_638812_V	VATD_HUMAN_V-type_proton_ATPase_subunit_D			4.691	0.6037	0.068844	9	5	0	4	12	6	0	5	15	8	1	7	0.94536	0.849501	0.982203	0.988046	0.863213	0.874586	1.16309	1.8392e+06	1.65265e+06	1.91392e+06	1.92862e+06	1.67905e+06	1.70249e+06	0.804756	0.0534591	3
m.12609	Pmi_580670_D	DC1L2_PONAB_Cytoplasmic_dynein_1_light_intermediate_chain_2			4.937	0.6	0.020288	10	6	0	5	19	15	0	14	17	14	0	14	0.936735	0.827357	0.814284	0.912114	0.867119	0.999936	1.22799	1.00659e+06	880727	867331	979598	927693	1.07662e+06	0.804559	0.0535629	3
PMI_010258,PMI_024375,m.26229	None,None,38162	XP_022089572.1 cytochrome c oxidase subunit 5B, mitochondrial-like [Acanthaster planci] (id=89.43%; len=123; e=1.40E-79) ,XP_022089572.1 cytochrome c oxidase subunit 5B, mitochondrial-like [Acanthaster planci] (id=89.43%; len=123; e=2.61E-79) ,XP_022089572.1 cytochrome c oxidase subunit 5B, mitochondrial-like [Acanthaster planci] (id=83.11%; len=148; e=9.53E-85)	2040	6	4.033	0.491	0.086644	11	4	0	0	15	5	0	0	13	4	0	0	0.896166	0.948598	0.863912	0.861351	0.915203	0.988462	1.14757	1.28307e+07	1.35392e+07	1.233e+07	1.22654e+07	1.30074e+07	1.41281e+07	0.804448	0.0536221	3
PMI_016942,m.28960,m.17466	None,Pmi_662054_S,22889	XP_022109377.1 sodium- and chloride-dependent glycine transporter 1-like [Acanthaster planci] (id=80.17%; len=237; e=5.10E-129) ,SC6A5_HUMAN_Sodium-_and_chloride-dependent_glycine_transp..CUT,XP_022109377.1 sodium- and chloride-dependent glycine transporter 1-like [Acanthaster planci] (id=83.13%; len=243; e=2.81E-140)	1883	2	3.295	0.4649	0.038999	2	1	0	0	3	2	0	2	4	2	0	2	0.808715	0.970687	0.866013	0.834924	0.963246	0.945207	1.20028	231201	277638	247506	238688	275897	270427	0.804392	0.0536516	3
PMI_006335,m.11756	None,Pmi_573650_G	XP_022080771.1 golgin subfamily A member 7-like [Acanthaster planci] (id=80.26%; len=152; e=2.42E-84) ,GOGA7_MOUSE_Golgin_subfamily_A_member_7	825	5	3.45	0.5373	0.209126	3	3	0	0	2	2	0	1	5	4	0	0	0.866595	0.868625	0.964422	0.959728	0.941983	0.942893	1.11289	411078	412595	462115	459159	448556	449727	0.804082	0.0538159	3
m.43528,m.16494	65422,Pmi_608470_T	XP_022086345.1 tryptophan 2,3-dioxygenase-like [Acanthaster planci] (id=79.39%; len=427; e=0.00E+00) ,T23O_ANOGA_Tryptophan_2,3-dioxygenase	1358	2	2.362	0.3747	0.94653	1	1	0	0	1	1	0	0					0.687583	0.880721	0.843519	0.846323	0.862404	1	1.45437	62825.7	80494.1	77117.2	77363.6	78812.9	91396.9	0.804059	0.0538281	2
PMI_010081		XP_022095271.1 UDP-glucose:glycoprotein glucosyltransferase 1-like isoform X2 [Acanthaster planci] (id=87.66%; len=1426; e=0.00E+00)			4.93	0.62	0.02874	21	16	1	2	24	18	2	3	27	22	1	4	0.91647	0.958828	0.887939	0.971032	0.977123	0.964894	1.10044	1.51606e+06	1.58937e+06	1.46715e+06	1.60722e+06	1.61595e+06	1.5973e+06	0.803647	0.0540465	3
PMI_013432,m.50850	None,76245	XP_022101366.1 lactoylglutathione lyase-like isoform X1 [Acanthaster planci] (id=68.08%; len=235; e=3.37E-106) ,XP_022101366.1 lactoylglutathione lyase-like isoform X1 [Acanthaster planci] (id=93.33%; len=180; e=1.25E-125)	1576	9	4.351	0.5638	0.080049	12	9	0	0	13	6	0	0	11	6	0	0	0.916004	0.801149	0.959155	0.945878	0.846442	0.861963	1.19722	3.30849e+06	2.89346e+06	3.45569e+06	3.42829e+06	3.04087e+06	3.10005e+06	0.803468	0.0541418	3
m.45152	67638	XP_022091869.1 glutaredoxin-3-like [Acanthaster planci] (id=80.86%; len=209; e=1.05E-119)			4.641	0.5891	0.010201	15	9	0	9	20	11	0	10	21	12	0	12	0.928622	0.927999	0.902573	0.97819	0.975401	0.997875	1.10559	2.74385e+06	2.73799e+06	2.66498e+06	2.88811e+06	2.87618e+06	2.9435e+06	0.80337	0.0541937	3
m.28826	Pmi_661720_S	SYVC_RAT_Valine--tRNA_ligase			5.495	0.6675	0.077277	26	20	0	19	31	21	0	4	39	31	0	8	0.84399	0.92391	0.901341	0.944414	0.923156	0.983888	1.16576	3.48427e+06	3.81641e+06	3.72172e+06	3.89759e+06	3.81063e+06	4.06367e+06	0.803361	0.0541988	3
PMI_012348,m.52282	None,77950	XP_022079289.1 anoctamin-4-like isoform X9 [Acanthaster planci] (id=66.28%; len=258; e=1.46E-106) ,XP_022079282.1 anoctamin-4-like isoform X2 [Acanthaster planci] (id=82.47%; len=913; e=0.00E+00)	2077	3	4.703	0.4912	0.010722	1	1	0	0	1	1	0	0	2	2	0	2	0.877938	0.743472	0.777189	0.764269	0.969341	0.748971	1.3038	60665.6	54735	56818.9	55643.5	68160	52581.8	0.803343	0.0542084	3
PMI_009162		XP_022090631.1 thioredoxin domain-containing protein 16-like [Acanthaster planci] (id=74.21%; len=190; e=3.25E-88)			5.779	0.679	0.015812	5	4	1	3	7	6	1	4	10	6	1	4	0.839304	1	0.845812	0.874143	0.973802	0.903818	1.19146	535601	639902	538694	562521	623454	578832	0.803281	0.0542414	3
m.44424	66647	PON61999.1 hypothetical protein PanWU01x14_142010 [Parasponia andersonii] (id=45.24%; len=84; e=1.00E-08)			2.414	0.2049	0.345032					1	1	1	0	1	1	1	0	0.479832	0.988487	0.546393	0.844899	0.508498	0.871406	2.06007	23750.1	50195.9	27672.6	42953.1	25389.2	44854.5	0.803049	0.0543646	2
PMI_023701		XP_022086334.1 dynein heavy chain 10, axonemal-like [Acanthaster planci] (id=83.66%; len=557; e=0.00E+00)			4.158	0.4739	0.222829	4	4	1	0	6	6	1	0	4	4	1	0	0.775537	0.907459	0.831977	0.966153	0.817261	0.934267	1.24579	268681	311192	286415	332929	280829	319550	0.802767	0.0545148	3
m.28207	41398	XP_022103620.1 60S acidic ribosomal protein P0-like [Acanthaster planci] (id=84.72%; len=72; e=5.04E-34)			6.645	0.6564	0.06238	5	3	1	0	7	3	1	0	7	4	1	0	0.705171	0.866104	0.792005	0.522274	1	0.762198	1.9147	1.39084e+06	1.70675e+06	1.55445e+06	1.0274e+06	1.96323e+06	1.49624e+06	0.802518	0.0546476	3
m.2121,m.11114	3925,Pmi_567340_H	XP_022108453.1 HEAT repeat-containing protein 6-like [Acanthaster planci] (id=77.57%; len=214; e=8.97E-103) ,HEAT6_HUMAN_HEAT_repeat-containing_protein_6	1429	2	3.637	0.4918	0.108885	2	2	0	1					2	1	0	0	0.841072	0.942237	0.851818	0.80574	0.945418	0.995469	1.23547	77523.6	86846.5	78428	74221.7	87197	91880.2	0.802303	0.0547625	2
PMI_003334		XP_022099752.1 ankyrin repeat domain-containing protein 16-like isoform X1 [Acanthaster planci] (id=58.26%; len=321; e=1.18E-101)			3.977	0.4941	0.015143	4	4	1	3	3	3	1	2	2	2	1	1	0.836432	0.856194	0.837638	0.969342	0.877924	0.899725	1.1589	130623	132873	130521	153798	136114	140558	0.801874	0.0549923	3
m.30226	Pmi_666092_T	TKT_BOVIN_Transketolase			6.792	0.6991	0.004252	101	33	2	4	159	44	5	6	159	42	4	5	0.990193	0.970879	0.956739	0.932076	0.987965	0.977814	1.06235	7.02124e+07	6.88575e+07	6.78426e+07	6.60965e+07	7.00503e+07	6.93557e+07	0.801816	0.0550233	3
PMI_008645,m.34651	None,52174	XP_022082028.1 protein mago nashi homolog [Acanthaster planci] (id=95.92%; len=147; e=8.12E-100) ,XP_022082028.1 protein mago nashi homolog [Acanthaster planci] (id=95.92%; len=147; e=6.57E-100)	2566	5	3.954	0.4917	0.028203	4	3	0	2	6	4	0	2	4	3	0	0	0.906608	0.891958	0.97314	0.963461	0.908192	0.910385	1.09102	1.52109e+06	1.4861e+06	1.62436e+06	1.61565e+06	1.52349e+06	1.52336e+06	0.801751	0.055058	3
m.53547	79737	XP_022103725.1 lupus La protein homolog [Acanthaster planci] (id=79.34%; len=426; e=0.00E+00)			5.357	0.6576	0.026372	35	24	0	21	56	32	0	27	49	31	0	29	0.895768	0.9366	0.909037	0.914412	0.942628	1	1.11636	5.29854e+06	5.54934e+06	5.37837e+06	5.40515e+06	5.58637e+06	5.93197e+06	0.801679	0.0550968	3
m.26230	Pmi_653173_D	DYH2_MOUSE_Dynein_heavy_chain_2,_axonemal			4.657	0.5948	0.064019	32	30	0	27	26	23	0	22	21	20	0	19	0.88961	0.930728	0.962838	0.963566	0.971911	0.992349	1.11549	1.70608e+06	1.78506e+06	1.84643e+06	1.84789e+06	1.86387e+06	1.90343e+06	0.801577	0.0551513	3
m.24222,m.8189	34409,Pmi_532310_Y	XP_022083593.1 thioredoxin domain-containing protein plp1-like [Acanthaster planci] (id=88.83%; len=206; e=8.81E-132) ,YERC_SCHPO_Thioredoxin_domain-containing_protein_C2F3.12c	1875	5	4.914	0.5504	0.158063	4	4	0	2	5	5	0	0	4	3	0	0	0.80286	0.849775	0.954224	0.996783	0.806081	0.89094	1.24154	359878	376398	426072	444645	358296	398510	0.801543	0.0551699	3
m.29128	Pmi_662560_M	MRE11_MACFA_Double-strand_break_repair_protein_MRE11A			4.142	0.5673	0.08011	3	3	0	3	7	7	0	7	6	6	0	6	0.797877	0.960857	0.841786	0.846041	0.935161	0.970584	1.21646	381441	458994	402628	404613	447121	464127	0.801534	0.0551746	3
m.25458	Pmi_650720_P	PO210_RAT_Nuclear_pore_membrane_glycoprotein_210			5.862	0.6796	0.013946	30	18	2	11	26	19	1	14	30	20	2	13	0.905034	0.920835	0.915214	0.992192	0.925113	0.92434	1.0963	3.27322e+06	3.32636e+06	3.30387e+06	3.58737e+06	3.33623e+06	3.34451e+06	0.801487	0.0551998	3
PMI_019501		XP_022107075.1 uncharacterized protein LOC110988125 [Acanthaster planci] (id=74.20%; len=314; e=6.11E-175)			5.371	0.6436	0.011332	9	6	0	2	14	9	0	3	15	9	0	4	0.896834	0.927967	0.94513	0.961286	0.957905	0.978615	1.09119	2.45497e+06	2.53864e+06	2.59118e+06	2.63107e+06	2.6217e+06	2.67702e+06	0.80126	0.0553216	3
m.26320	Pmi_653720_D	DC1I2_MOUSE_Cytoplasmic_dynein_1_intermediate_chain_2			4.504	0.5915	0.040302	4	4	0	0	7	6	0	6	9	7	0	7	0.916433	0.920092	0.927803	0.925156	0.930082	0.902888	1.03012	372961	373284	378233	374399	376520	365363	0.801209	0.0553487	3
PMI_009424		XP_022089869.1 putative glutamate synthase [NADPH] isoform X1 [Acanthaster planci] (id=81.91%; len=2200; e=0.00E+00)			4.898	0.5568	0.002286					13	12	0	8	14	12	1	7	0.894274	0.994004	0.958338	0.957511	0.945132	0.998092	1.11609	552718	614345	592273	591767	584141	616862	0.800976	0.055474	2
PMI_013791		XP_022102441.1 protein henna-like isoform X2 [Acanthaster planci] (id=57.30%; len=452; e=3.42E-157)			3.779	0.4961	0.077318	2	2	0	0	4	3	0	0	6	5	0	2	0.782794	0.870563	0.855912	0.950635	0.9092	0.968054	1.23666	202310	223915	221271	244536	233656	248098	0.800897	0.0555168	3
PMI_008217		XP_022105275.1 ribosome-binding protein 1-like isoform X6 [Acanthaster planci] (id=78.42%; len=329; e=2.12E-110)			5.03	0.5734	0.000431	10	8	1	0	13	9	0	2	14	12	1	3	0.98314	0.850217	0.744691	0.732034	0.775608	0.831354	1.34302	3.17234e+06	2.69106e+06	2.35294e+06	2.30787e+06	2.44314e+06	2.63128e+06	0.800695	0.0556253	3
m.9549,m.25105	Pmi_549340_G,36077	GCSH_RABIT_Glycine_cleavage_system_H_protein,_mitochondrial,XP_022094538.1 uncharacterized protein LOC110981338 isoform X1 [Acanthaster planci] (id=69.52%; len=187; e=2.61E-91)	625	4	5.432	0.7176	0.199571	6	4	0	0	3	2	0	0	2	2	0	0	0.916328	0.88915	0.969381	0.984699	0.666058	0.809087	1.4784	3.07739e+06	3.02231e+06	3.3046e+06	3.33782e+06	2.2315e+06	2.74444e+06	0.800287	0.0558451	3
m.17794	Pmi_616350_C	CSN8_DANRE_COP9_signalosome_complex_subunit_8			5.165	0.6211	0.203271	3	3	2	1	4	3	2	1	4	4	2	2	0.872255	0.96291	0.865211	0.919421	0.947505	1	1.15579	714182	787033	709576	752793	773735	817832	0.800166	0.0559104	3
m.12368	Pmi_578040_R	RL13A_MACFA_60S_ribosomal_protein_L13a			3.569	0.5224	0.012472	19	9	3	6	38	11	1	10	33	13	3	10	0.937358	0.798098	0.928521	0.991024	0.791184	0.81277	1.25258	1.32041e+07	1.12518e+07	1.3128e+07	1.40167e+07	1.11294e+07	1.14154e+07	0.799499	0.056271	3
PMI_023988,m.24130,m.34736	None,Pmi_645481_C,52296	XP_022107757.1 peptidyl-prolyl cis-trans isomerase Pin1-like [Acanthaster planci] (id=89.54%; len=153; e=1.98E-99) ,CSK2B_DANRE_Casein_kinase_II_subunit_beta,XP_022107757.1 peptidyl-prolyl cis-trans isomerase Pin1-like [Acanthaster planci] (id=89.54%; len=153; e=5.17E-98)	2249	11	5.869	0.6551	0.111021	17	10	0	0	13	9	0	0	23	13	0	0	0.95583	0.958734	0.902157	0.84151	0.952166	0.988337	1.17448	5.22054e+06	5.24509e+06	4.93011e+06	4.60631e+06	5.20286e+06	5.40414e+06	0.79908	0.0564978	3
m.11597	Pmi_571900_A	AAAS_HUMAN_Aladin			3.553	0.5318	0.022673	5	3	3	0	2	2	2	0	9	6	6	0	0.953322	0.951096	0.949996	0.947016	0.95064	0.976877	1.03153	409561	407938	407741	406305	408156	419750	0.799005	0.0565385	3
PMI_003469		XP_022093226.1 putative phospholipase B-like 2 [Acanthaster planci] (id=81.40%; len=328; e=0.00E+00)			4.092	0.5564	0.023052	16	10	2	2	31	19	3	3	34	21	3	3	0.922898	0.959785	0.822699	0.815101	0.914728	0.905166	1.17751	6.08143e+06	6.34863e+06	5.41856e+06	5.37837e+06	6.01573e+06	5.96637e+06	0.798302	0.0569202	3
m.33174	49662	WP_009106917.1 uridine monophosphate kinase [Desulfovibrio sp. U5L] (id=36.77%; len=68; e=1.50E+00)			1.909	0.2192	0.054303	1	1	1	0	1	1	1	0	1	1	1	0	0.910045	0.781937	0.885035	0.954902	0.831128	0.747561	1.27736	220851	189826	213900	232058	201187	181920	0.798083	0.0570398	3
m.19056,PMI_008373	Pmi_623080_E,None	EXPI_MOUSE_Extracellular_peptidase_inhibitor,XP_022087452.1 agrin-like [Acanthaster planci] (id=63.27%; len=196; e=2.99E-82)	1668	11	5.91	0.588	0.043865	10	6	0	0	10	8	0	7	12	11	0	9	0.836461	1	0.737542	0.779521	0.701068	0.802702	1.42639	2.47558e+06	2.96717e+06	2.18779e+06	2.31394e+06	2.08482e+06	2.38689e+06	0.797994	0.0570881	3
m.17499,m.18404	22962,Pmi_619660_K	XP_022103578.1 ketohexokinase-like [Acanthaster planci] (id=75.82%; len=306; e=2.11E-177) ,KHK_HUMAN_Ketohexokinase	161	8	4.324	0.6151	0.004525	9	7	0	4	4	4	0	2	9	8	0	6	0.809853	0.972637	0.908264	0.933813	0.939314	0.999369	1.23401	1.36872e+06	1.64006e+06	1.52656e+06	1.57089e+06	1.58613e+06	1.68895e+06	0.797972	0.0571	3
m.10764,m.22525,PMI_011295	Pmi_563951_A,31365,None	ADPPT_PONAB_L-aminoadipate-semialdehyde_dehydrogenase-phosp..CUT,XP_022098934.1 L-aminoadipate-semialdehyde dehydrogenase-phosphopantetheinyl transferase-like [Acanthaster planci] (id=87.54%; len=289; e=0.00E+00) ,XP_022098934.1 L-aminoadipate-semialdehyde dehydrogenase-phosphopantetheinyl transferase-like [Acanthaster planci] (id=87.54%; len=289; e=0.00E+00)	2683	5	3.676	0.4982	0.215169	4	3	0	0	2	2	0	0	3	3	0	0	0.892325	0.904877	0.9178	0.896284	0.870494	0.931304	1.06986	310680	313882	326150	321022	301918	322246	0.797775	0.0572074	3
PMI_004578		XP_022094544.1 probable aminopeptidase NPEPL1 [Acanthaster planci] (id=89.89%; len=524; e=0.00E+00)			5.991	0.6339	0.01938	34	22	0	21	35	20	0	19	36	22	0	20	0.891419	0.769704	0.937009	1	0.837801	0.783502	1.2992	1.22137e+07	1.04601e+07	1.28866e+07	1.37053e+07	1.14769e+07	1.06806e+07	0.797619	0.0572926	3
PMI_022350,m.23432,m.23436	None,32968,32970	XP_022109974.1 fibropellin-1-like [Acanthaster planci] (id=63.69%; len=157; e=1.24E-52) ,XP_022109974.1 fibropellin-1-like [Acanthaster planci] (id=63.69%; len=157; e=3.13E-52) ,XP_022109974.1 fibropellin-1-like [Acanthaster planci] (id=64.33%; len=157; e=2.73E-53)	1845	6	5.88	0.676	0.058038	8	5	0	4	14	6	0	5	19	6	0	5	0.789447	0.934104	0.864249	0.927977	0.905565	0.964011	1.22112	2.44392e+06	2.87187e+06	2.67547e+06	2.87307e+06	2.798e+06	2.97813e+06	0.797422	0.0574001	3
PMI_016111,PMI_007043,m.25872,m.31304	None,None,Pmi_652130_Z,46852	XP_022103165.1 zinc transporter 9-like [Acanthaster planci] (id=85.89%; len=581; e=0.00E+00) ,XP_022103165.1 zinc transporter 9-like [Acanthaster planci] (id=86.58%; len=581; e=0.00E+00) ,ZNT9_DANRE_Zinc_transporter_9,XP_022103165.1 zinc transporter 9-like [Acanthaster planci] (id=86.45%; len=583; e=0.00E+00)	199	1	2.76	0.2094	0.691583	1	1	0	0					1	1	0	0	0.707963	0.989198	0.792908	0.804775	0.901956	0.971761	1.39724	68479	95855.9	76870	77642.7	87313.6	94321.2	0.797258	0.0574894	2
m.28680,m.28679	42335,42332	XP_022086812.1 apoptosis-inducing factor 1, mitochondrial-like [Acanthaster planci] (id=90.09%; len=444; e=0.00E+00) ,XP_022086812.1 apoptosis-inducing factor 1, mitochondrial-like [Acanthaster planci] (id=90.27%; len=442; e=0.00E+00)	71	28	4.811	0.6684	0.026891	36	21	0	20	44	27	0	24	46	24	0	21	0.882397	0.858424	0.980255	0.981004	0.944453	0.938658	1.1428	7.28357e+06	7.07358e+06	8.07955e+06	8.09132e+06	7.78836e+06	7.73655e+06	0.797159	0.0575437	3
m.14789,PMI_016837,PMI_013240	Pmi_597280_G,None,None	GYS1_BOVIN_Glycogen_[starch]_synthase,_muscle,XP_022083700.1 glycogen [starch] synthase, muscle-like [Acanthaster planci] (id=91.15%; len=689; e=0.00E+00) ,XP_022083700.1 glycogen [starch] synthase, muscle-like [Acanthaster planci] (id=90.48%; len=641; e=0.00E+00)	488	5	4.351	0.5732	0.022891	3	2	0	0	5	4	0	0	3	3	0	0	0.824763	0.930727	0.902826	0.878804	0.92566	1	1.21247	324345	366239	355187	345438	364218	393358	0.796976	0.0576437	3
m.21413	Pmi_634381_B	BAG6_XENTR_Large_proline-rich_protein_bag6			4.052	0.6066	0.094222	2	1	0	0	6	5	0	4	4	4	0	3	0.652538	0.691049	0.685358	0.963044	0.853773	0.791647	1.47584	167380	178712	176064	259408	222505	203941	0.796824	0.0577274	3
m.14088	Pmi_591780_E	EF2_CHICK_Elongation_factor_2			6.127	0.7309	0.006072	139	55	3	43	258	64	4	46	255	72	6	51	0.96527	0.99145	0.946276	0.909668	0.971531	0.987536	1.0899	1.47203e+08	1.51176e+08	1.44338e+08	1.38717e+08	1.48111e+08	1.50528e+08	0.796644	0.0578259	3
m.19264	25641	XP_022080007.1 hypoxanthine-guanine phosphoribosyltransferase-like [Acanthaster planci] (id=89.30%; len=215; e=7.62E-138)			5.356	0.6744	0.003121	27	11	8	3	35	15	11	4	42	14	10	4	0.915333	0.978216	0.979175	0.941362	0.974393	0.993191	1.08506	8.43393e+06	9.01216e+06	9.02121e+06	8.67396e+06	8.97947e+06	9.14882e+06	0.796104	0.0581219	3
m.27236	Pmi_656741_G	G3BP1_BOVIN_Ras_GTPase-activating_protein-binding_protein_1			5.422	0.6648	0.036185	22	11	1	9	27	11	0	9	24	15	0	13	0.870268	1	0.886162	0.914817	0.91664	0.957698	1.14907	3.74386e+06	4.30431e+06	3.81136e+06	3.93231e+06	3.9438e+06	4.12312e+06	0.796016	0.0581704	3
m.53616	79841	XP_022082523.1 methionine aminopeptidase 2-like [Acanthaster planci] (id=75.17%; len=290; e=3.14E-124)			5.571	0.6555	0.010488	18	10	10	0	19	10	10	0	14	8	8	0	0.905367	0.941351	0.94114	0.912718	1	0.967465	1.10453	2.31482e+06	2.40741e+06	2.4072e+06	2.33539e+06	2.55963e+06	2.47408e+06	0.795981	0.0581899	3
m.15121	Pmi_599720_W	WDR85_MOUSE_WD_repeat-containing_protein_85			3.337	0.445	0.008387	1	1	1	0	1	1	0	0					1	0.825512	0.746423	0.916532	0.802488	0.906705	1.33972	27677.2	22833.1	20676.4	25469	22235.5	24905.7	0.795875	0.0582481	2
m.11577	Pmi_571660_R	RGN_XENLA_Regucalcin			4.055	0.5826	0.027433	9	6	2	4	14	9	4	5	9	5	3	2	0.898528	0.987596	0.933031	0.953543	0.934375	0.972108	1.09913	1.79488e+06	1.97384e+06	1.86669e+06	1.90579e+06	1.87073e+06	1.9446e+06	0.795704	0.0583417	3
m.37193,m.37190	56178,56173	XP_022106369.1 1-aminocyclopropane-1-carboxylate synthase-like protein 1 [Acanthaster planci] (id=75.45%; len=224; e=1.95E-124) ,XP_022106369.1 1-aminocyclopropane-1-carboxylate synthase-like protein 1 [Acanthaster planci] (id=75.08%; len=301; e=2.50E-169)	156	1	4.141	0.5378	0.212329	2	2	0	0	5	4	0	2	6	5	0	4	0.919255	0.936966	0.91973	0.913339	1	0.951537	1.09488	929177	947273	928373	922541	1.00982e+06	961397	0.795554	0.0584246	3
PMI_013120		XP_022094549.1 adenylate kinase isoenzyme 6-like [Acanthaster planci] (id=94.41%; len=179; e=1.25E-110)			4.711	0.591	0.078008	2	2	0	0	2	2	1	1	1	1	1	0	0.679875	0.822429	0.826502	0.96202	0.708425	0.898715	1.415	45544.3	55097.2	56324	65773.7	47193.7	61076.5	0.79526	0.0585864	3
m.20433,m.22339	27628,Pmi_638401_O	XP_022104951.1 pyruvate dehydrogenase E1 component subunit beta, mitochondrial-like [Acanthaster planci] (id=92.15%; len=344; e=0.00E+00) ,ODPB_RAT_Pyruvate_dehydrogenase_E1_component_subunit_beta..CUT	1291	6	4.194	0.5589	0.050845	4	4	0	2	2	2	0	1	2	2	0	0	0.895766	0.93974	0.880427	0.910488	0.854661	0.952303	1.11425	152214	160790	150409	155185	144114	164183	0.795161	0.0586411	3
m.18549	Pmi_620510_D	DNJC8_RAT_DnaJ_homolog_subfamily_C_member_8_>gi			3.128	0.3188	0.027269	1	1	0	0	4	3	0	3	2	2	0	2	0.815273	0.989628	0.878544	0.833781	0.89628	0.922527	1.21386	328146	408400	360638	351776	377316	384723	0.795035	0.0587106	3
m.22139,m.26203,m.26202	Pmi_637342_S,38116,38115	SCRB1_PIG_Scavenger_receptor_class_B_member_1,XP_022086017.1 scavenger receptor class B member 1-like [Acanthaster planci] (id=79.96%; len=524; e=0.00E+00) ,XP_022086017.1 scavenger receptor class B member 1-like [Acanthaster planci] (id=79.77%; len=524; e=0.00E+00)	1592	4	3.739	0.5076	0.213182	1	1	0	0	2	2	0	2	3	3	0	2	0.69955	0.784767	0.790097	0.881184	0.795824	0.973689	1.39188	125013	142519	143230	162298	143046	179562	0.794863	0.0588053	3
m.23623	Pmi_643570_F	FONG_HUMAN_Formiminotransferase_N-terminal_subdomain-conta..CUT			4.61	0.6445	0.100104	9	6	2	4	13	8	1	7	12	9	2	7	0.838738	0.937505	0.905487	0.931009	0.896095	1	1.19227	886337	991573	957210	982361	947065	1.05687e+06	0.794816	0.0588314	3
m.15132,m.51476	Pmi_599730_C,76958	CREL2_HUMAN_Cysteine-rich_with_EGF-like_domain_protein_2,XP_022110728.1 cysteine-rich with EGF-like domain protein 2 [Acanthaster planci] (id=79.34%; len=426; e=0.00E+00)	826	9	4.148	0.5647	0.038503	4	3	0	1	7	7	0	4	6	5	0	3	0.822585	0.94016	0.831115	0.941887	0.946807	0.936809	1.15101	489380	559776	494150	561576	564829	558901	0.79445	0.0590336	3
m.40249,m.21516	60707,Pmi_634820_R	XP_022081282.1 ruvB-like 1 [Acanthaster planci] (id=95.61%; len=456; e=0.00E+00) ,RUVB1_XENLA_RuvB-like_1	1499	21	5.612	0.6843	0.016474	26	15	0	2	39	20	0	3	35	20	0	3	0.908791	0.987306	0.923531	0.923828	0.9692	0.99732	1.09741	8.24842e+06	8.94804e+06	8.36932e+06	8.37127e+06	8.7854e+06	9.04483e+06	0.793838	0.0593729	3
m.37597,m.15960	56891,Pmi_605380_H	XP_022105173.1 4-hydroxyphenylpyruvate dioxygenase-like [Acanthaster planci] (id=86.79%; len=386; e=0.00E+00) ,HPPD_XENTR_4-hydroxyphenylpyruvate_dioxygenase	1143	16	5.499	0.6696	0.013182	22	12	0	4	24	13	0	11	26	15	0	13	0.905287	0.970749	0.915513	0.861938	0.993295	0.984819	1.1524	6.38087e+06	6.84413e+06	6.45865e+06	6.07801e+06	6.99999e+06	6.93653e+06	0.793494	0.059564	3
m.17896	Pmi_616870_C	CPT1A_RAT_Carnitine_O-palmitoyltransferase_1,_liver_isoform			3.709	0.6045	0.326847	3	2	1	1	2	2	1	1	2	2	1	1	0.795516	0.795001	0.689807	0.652695	0.998464	0.814944	1.52976	62292.1	61454	52403.2	50128.7	77840.1	62622.1	0.793487	0.059568	3
m.26220	Pmi_653252_P	PYR1_SQUAC_CAD_protein			5.42	0.6653	0.004712	48	25	1	18	64	33	2	20	59	34	2	21	0.996772	0.939162	0.995783	0.976435	0.936754	0.93325	1.06807	1.28633e+07	1.2103e+07	1.28524e+07	1.25935e+07	1.20714e+07	1.2028e+07	0.793418	0.0596064	3
PMI_009941		XP_022103095.1 cytoplasmic dynein 2 heavy chain 1-like isoform X2 [Acanthaster planci] (id=91.53%; len=1275; e=0.00E+00)			4.382	0.5558	0.104344	15	14	0	13	24	24	1	20	23	21	1	15	0.888023	0.977288	0.947972	0.965545	0.963899	0.983482	1.1075	1.14623e+06	1.26278e+06	1.2237e+06	1.24472e+06	1.24292e+06	1.26822e+06	0.793384	0.059625	3
m.31135,PMI_004436	46513,None	XP_022086719.1 transcriptional regulator ATRX-like isoform X2 [Acanthaster planci] (id=61.96%; len=1120; e=0.00E+00) ,XP_022086718.1 transcriptional regulator ATRX-like isoform X1 [Acanthaster planci] (id=66.69%; len=1210; e=0.00E+00)	1227	2	2.978	0.3089	0.220351					1	1	0	0	1	1	0	0	0.799808	0.690078	0.59923	0.95298	0.828598	0.987708	1.64829	28890.3	24934.3	20994.4	34850.2	29747.2	36427.9	0.793106	0.0597796	2
PMI_026777		XP_022083049.1 26S proteasome non-ATPase regulatory subunit 8-like [Acanthaster planci] (id=95.47%; len=265; e=7.29E-179)			5.059	0.6105	0.024791	11	9	0	9	22	13	0	12	27	14	0	13	0.912647	0.964552	0.99032	0.940499	0.985059	0.955607	1.08511	4.94533e+06	5.22574e+06	5.36878e+06	5.09993e+06	5.34443e+06	5.17595e+06	0.793106	0.0597796	3
m.28505	Pmi_660840_C	CHDM_DROME_Chromodomain-helicase-DNA-binding_protein_Mi-..CUT			4.516	0.6939	0.042181	4	3	1	2	6	5	1	4	13	9	1	6	0.889495	0.936543	0.838894	0.855742	0.962586	0.887244	1.14745	907810	952511	858016	869283	986915	898536	0.79302	0.0598273	3
PMI_024483		protein AED:0.76 eAED:0.76 QI:0|0|0.09|0.09|0.5|0.45|11|81|392			2.47	0.3452	0.391386	1	1	1	0	3	2	2	0	3	1	1	0	0.570496	0.940443	0.691533	0.584764	0.842025	0.928216	1.64847	1.36507e+06	2.29353e+06	1.62637e+06	1.40558e+06	2.0435e+06	2.23336e+06	0.792895	0.0598968	3
m.20345	Pmi_629080_H	HEBP2_HUMAN_Heme-binding_protein_2			6.297	0.6745	0.022304	64	31	11	19	92	39	15	8	99	42	16	21	0.918998	0.958083	0.977357	0.987172	0.956451	0.973943	1.07418	2.66387e+07	2.77764e+07	2.83305e+07	2.86189e+07	2.77241e+07	2.82285e+07	0.79287	0.0599108	3
PMI_014003		sp|Q964E1.1|ACTC_BIOOB RecName: Full=Actin, cytoplasmic; Contains: RecName: Full=Actin, cytoplasmic, intermediate form; Flags: Precursor (id=74.66%; len=371; e=0.00E+00)			6.338	0.6752	0.010584	87	10	3	2	116	10	2	2	121	11	3	2	0.948532	0.925686	0.947011	0.885003	0.977984	0.956283	1.10506	2.73517e+07	2.66677e+07	2.72798e+07	2.55048e+07	2.81871e+07	2.75667e+07	0.79281	0.0599444	3
PMI_019014		XP_022090200.1 trichohyalin-like isoform X3 [Acanthaster planci] (id=58.02%; len=293; e=1.31E-74)			3.111	0.4994	0.017943	3	3	1	0	2	2	1	0	2	2	1	0	0.872901	0.913226	0.900188	0.973341	0.811924	0.815061	1.19881	105443	109187	108932	117037	97473.6	97974.6	0.792699	0.0600061	3
PMI_007171		XP_022086467.1 ester hydrolase C11orf54 homolog [Acanthaster planci] (id=83.98%; len=231; e=3.72E-148)			5.131	0.6354	0.133442	7	5	5	0	9	6	6	0	7	7	7	0	0.894638	0.968446	0.9292	0.826667	0.948109	0.945401	1.17151	417164	452035	434414	386444	441978	441228	0.792437	0.0601523	3
m.37467	56635	XP_022098000.1 thymidylate kinase-like isoform X1 [Acanthaster planci] (id=75.73%; len=206; e=2.63E-113)			4.557	0.6198	0.011754	10	6	1	5	17	9	0	9	14	8	0	8	0.9404	0.941817	0.971523	0.890021	0.966454	0.929122	1.09157	4.56169e+06	4.56406e+06	4.71493e+06	4.31039e+06	4.68659e+06	4.5013e+06	0.792414	0.0601653	3
m.14638	Pmi_596150_L	LECE_ANTCR_Echinoidin			3.952	0.4839	0.031895	1	1	0	0	1	1	0	0	5	5	1	2	1	0.65389	0.595228	0.563732	0.727086	0.739363	1.77389	725924	484031	442625	418209	537069	543668	0.79222	0.0602736	3
m.18493	Pmi_620170_T	TOM70_HUMAN_Mitochondrial_import_receptor_subunit_TOM70			5.257	0.6679	0.0061	22	15	1	14	33	19	2	16	30	19	3	15	0.93073	0.983973	0.938776	0.927883	0.982887	0.95723	1.06045	3.61952e+06	3.82707e+06	3.65227e+06	3.60999e+06	3.82301e+06	3.72472e+06	0.792145	0.0603158	3
m.8712	Pmi_539000_Y	YF64_CAEEL_Uncharacterized_protein_R102.4			5.578	0.6694	0.131115	6	4	0	3	6	4	0	1	10	7	0	7	0.85425	0.944118	0.855646	0.901252	0.980295	0.891535	1.14755	1.02176e+06	1.13007e+06	1.02128e+06	1.07162e+06	1.17153e+06	1.06525e+06	0.79195	0.0604243	3
PMI_000190		XP_022087764.1 angiotensin-converting enzyme-like [Acanthaster planci] (id=69.23%; len=637; e=0.00E+00)			3.089	0.4186	0.026249	3	3	0	2					2	2	0	0	0.753538	0.762799	0.769215	0.826554	0.77721	1	1.32707	195951	197221	200990	214764	202698	266156	0.791888	0.0604593	2
PMI_011340		XP_022082899.1 eukaryotic translation initiation factor 3 subunit M-like [Acanthaster planci] (id=88.33%; len=377; e=0.00E+00)			6.215	0.6153	0.005033	14	10	6	4	22	13	9	4	21	14	8	5	0.909547	0.984876	0.958667	0.920501	0.943949	0.986746	1.08488	2.68469e+06	2.90725e+06	2.82947e+06	2.71824e+06	2.78702e+06	2.91345e+06	0.791392	0.0607372	3
m.43531	65424	XP_022095937.1 sorting nexin-27-like isoform X1 [Acanthaster planci] (id=86.12%; len=598; e=0.00E+00)			4.109	0.6326	0.050916	15	13	6	7	20	14	7	7	14	13	5	8	0.94424	0.916927	0.934914	0.941723	0.959144	0.99434	1.08443	2.06248e+06	2.00312e+06	2.04062e+06	2.05901e+06	2.09264e+06	2.1691e+06	0.791245	0.0608196	3
m.22219	Pmi_637870_E	EIF2A_CHICK_Eukaryotic_translation_initiation_factor_2A			5.749	0.6895	0.106424	11	8	0	5	28	18	1	17	24	16	1	15	0.931406	0.892549	0.834157	0.895115	0.940337	1	1.19882	3.58837e+06	3.43584e+06	3.21505e+06	3.44579e+06	3.62317e+06	3.85046e+06	0.79117	0.0608616	3
PMI_030281		XP_022092720.1 G protein-activated inward rectifier potassium channel 3-like [Acanthaster planci] (id=87.93%; len=522; e=0.00E+00)			3.645	0.4368	0.153206	2	1	1	0	3	2	2	0	3	2	2	0	0.895344	0.980705	0.92388	0.927781	0.921766	0.989693	1.10538	215321	236030	222214	223359	221706	238355	0.790896	0.0610154	3
m.28900,m.35085	Pmi_661821_R,52873	RPB1_DROME_DNA-directed_RNA_polymerase_II_subunit_RPB1,XP_022093490.1 DNA-directed RNA polymerase II subunit RPB1-like [Acanthaster planci] (id=96.42%; len=447; e=0.00E+00)	1667	4	3.108	0.5954	0.276753	4	4	0	0	2	2	0	0	3	3	0	0	0.775945	0.978577	0.815647	0.875971	0.892911	0.821104	1.26114	42797.1	54042	44963.4	48333.8	49396.8	45413.1	0.790522	0.0612253	3
PMI_024162,m.14906,PMI_014628	None,Pmi_598031_R,None	XP_022102231.1 28S ribosomal protein S23, mitochondrial-like isoform X1 [Acanthaster planci] (id=81.88%; len=138; e=1.14E-80) ,RT23_HUMAN_28S_ribosomal_protein_S23,_mitochondrial,XP_022102231.1 28S ribosomal protein S23, mitochondrial-like isoform X1 [Acanthaster planci] (id=66.84%; len=190; e=2.89E-81)	1937	4	3.87	0.492	0.311325	2	2	0	0	2	2	0	0	4	3	0	0	0.867382	0.951826	0.947493	0.839857	0.99405	0.906533	1.18359	101024	113327	112863	100429	118033	108037	0.790298	0.0613517	3
m.15897	21237	XP_022111824.1 prolow-density lipoprotein receptor-related protein 1-like [Acanthaster planci] (id=69.16%; len=441; e=0.00E+00)			4.541	0.6077	0.110643					7	7	0	0	7	7	0	0	0.990943	0.978709	0.828564	0.890532	0.950944	0.943088	1.19598	292593	288196	245111	263004	280095	277212	0.790024	0.0615058	2
m.44857	67169	XP_022084598.1 endoplasmic reticulum aminopeptidase 1-like [Acanthaster planci] (id=73.38%; len=477; e=0.00E+00)			5.983	0.5887	0.075211	7	7	2	2	6	5	1	2	9	8	1	4	0.81403	0.936726	0.943858	0.974446	0.895435	0.926162	1.19706	257350	297025	299077	308269	283747	294423	0.790021	0.0615075	3
m.30111	44864	XP_022107645.1 replication protein A 14 kDa subunit-like [Acanthaster planci] (id=87.07%; len=116; e=1.13E-68)			3.906	0.5997	0.179396	4	3	2	1	5	3	2	1	8	4	3	1	0.899096	0.936816	0.838865	0.867051	0.970718	0.868398	1.15718	711053	740963	662988	685570	766955	685825	0.789926	0.0615612	3
m.17182	Pmi_612930_C	CYB5_MOUSE_Cytochrome_b5			4.919	0.5997	0.042789	1	1	0	0	7	5	0	4	6	5	0	4	0.993392	0.838832	0.97608	0.94182	0.960297	0.895058	1.18426	1.66889e+06	1.40968e+06	1.63825e+06	1.57594e+06	1.61236e+06	1.49862e+06	0.789809	0.0616275	3
m.17722,PMI_025835,PMI_006767	Pmi_615980_B,None,None	BRD2_BOVIN_Bromodomain-containing_protein_2,XP_022084196.1 bromodomain-containing protein 4-like [Acanthaster planci] (id=75.00%; len=272; e=9.68E-103) ,XP_011662000.1 PREDICTED: bromodomain-containing protein 3-like [Strongylocentrotus purpuratus] (id=52.49%; len=341; e=3.52E-100)	2448	1	3.674	0.4453	1.13575					1	1	0	0	1	1	0	0	0.819367	0.964896	0.971256	0.975556	0.825606	1	1.22045	61539.7	72814	73570.2	73859.3	61921.9	75642.9	0.789727	0.0616738	2
PMI_022874,PMI_026494		XP_022098202.1 protein-glucosylgalactosylhydroxylysine glucosidase-like [Acanthaster planci] (id=78.63%; len=262; e=3.18E-146) ,XP_022098202.1 protein-glucosylgalactosylhydroxylysine glucosidase-like [Acanthaster planci] (id=78.24%; len=262; e=4.75E-146)	2635	2	3.962	0.5182	0.156914	1	1	0	0	4	2	0	1	1	1	0	0	0.883263	0.910123	0.872591	0.884239	0.913392	0.902311	1.04676	199416	205531	196415	198734	205997	203487	0.789707	0.0616847	3
m.50902	76295	XP_022087387.1 uncharacterized protein LOC110977496 isoform X1 [Acanthaster planci] (id=43.01%; len=1430; e=0.00E+00)			4.643	0.5715	0.025305	8	6	0	5	7	5	0	3	4	4	0	3	0.92207	0.793963	0.903464	1	0.853957	0.825918	1.2595	873918	752475	858613	950301	811292	782904	0.789322	0.0619024	3
m.28600	Pmi_660975_D	DYH10_HUMAN_Dynein_heavy_chain_10,_axonemal			4.682	0.5909	0.054546	23	19	2	11	17	17	1	11	23	21	2	14	0.920791	0.969239	0.989941	0.987911	0.983255	0.984867	1.0751	1.51137e+06	1.59059e+06	1.62487e+06	1.62148e+06	1.61378e+06	1.61647e+06	0.789143	0.0620036	3
m.32239	Pmi_671650_n	no_annot			5.698	0.6525	0.003451	43	12	12	0	83	13	13	0	88	12	12	0	0.982796	0.897731	0.910497	0.969048	0.920681	0.927121	1.09476	3.13236e+07	2.85341e+07	2.9122e+07	3.09297e+07	2.92061e+07	2.94439e+07	0.789142	0.062004	3
m.12954	Pmi_583671_K	K319L_HUMAN_Dyslexia-associated_protein_KIAA0319-like_protein			2.881	0.2895	0.023474	1	1	0	0	1	1	1	0	1	1	0	0	0.785284	0.856391	0.957849	0.81371	0.949769	0.892211	1.21975	47689.6	51972.9	58545.9	49583.2	57986.1	54257.8	0.789037	0.0620637	3
PMI_008285		XP_022088432.1 organic cation transporter protein-like [Acanthaster planci] (id=60.00%; len=425; e=7.96E-155)			3.73	0.3446	0.089752	3	2	2	0	4	3	1	2	3	2	1	1	0.823488	0.97415	0.899514	0.976801	0.899074	0.979881	1.18991	238896	282430	260585	282966	260608	284398	0.788947	0.0621144	3
PMI_024318,PMI_013820		XP_022111003.1 protein TEX261-like [Acanthaster planci] (id=86.00%; len=200; e=1.79E-109) ,XP_022111003.1 protein TEX261-like [Acanthaster planci] (id=89.00%; len=200; e=3.41E-118)	2534	2	3.85	0.4772	0.09288	2	1	0	0	5	3	0	0	3	2	0	0	0.790487	0.997221	0.922785	0.931741	0.932028	0.947867	1.26153	275100	347508	321445	324393	323292	329835	0.788778	0.0622103	3
PMI_018874,PMI_011927		XP_003604262.1 short transmembrane mitochondrial protein 1 [Medicago truncatula] (id=49.06%; len=53; e=1.86E-07) ,RLM99356.1 hypothetical protein C2845_PM06G08610 [Panicum miliaceum] (id=46.67%; len=60; e=5.59E-07)	1624	2	2.792	0.2957	1.0253					2	2	0	1	1	1	0	0	0.884172	0.861417	0.911258	1	0.864492	0.934213	1.16088	1.17559e+06	1.14509e+06	1.21309e+06	1.33204e+06	1.15168e+06	1.24419e+06	0.7887	0.0622547	2
m.16801	22147	XP_022088900.1 thioredoxin domain-containing protein 5-like isoform X1 [Acanthaster planci] (id=74.42%; len=391; e=0.00E+00)			6.518	0.6202	0.000406	31	18	0	17	56	28	0	25	59	32	0	27	0.920781	0.967566	0.909727	0.900643	0.994546	0.97134	1.10426	3.14686e+07	3.30643e+07	3.10888e+07	3.07832e+07	3.39675e+07	3.31906e+07	0.788691	0.0622594	3
PMI_012062,m.28470	None,Pmi_660701_W	XP_022111358.1 WD repeat-containing protein 36-like [Acanthaster planci] (id=58.31%; len=758; e=0.00E+00) ,WDR36_HUMAN_WD_repeat-containing_protein_36	759	2	2.749	0.3417	0.629677	2	2	0	1					1	1	0	0	0.746984	0.894058	0.870747	1	0.782529	0.915123	1.33872	75381.3	89417.7	87657.3	100484	78018.1	91984.8	0.788378	0.062437	2
m.37501	56702	XP_022092583.1 enoyl-CoA delta isomerase 1, mitochondrial-like [Acanthaster planci] (id=85.10%; len=302; e=0.00E+00)			5.878	0.6456	0.035864	18	13	3	9	24	13	3	9	22	14	4	9	0.892511	0.926112	0.916423	0.937137	0.932947	1	1.12043	3.39178e+06	3.52058e+06	3.48567e+06	3.56229e+06	3.54494e+06	3.80227e+06	0.788369	0.0624425	3
m.30229	Pmi_666061_P	PDIA5_HUMAN_Protein_disulfide-isomerase_A5			4.723	0.6517	0.00448	12	8	3	0	13	9	2	5	13	10	2	6	0.923035	1	0.894357	0.905367	0.937693	0.895814	1.11812	4.18471e+06	4.52367e+06	4.04627e+06	4.09129e+06	4.23982e+06	4.04831e+06	0.788225	0.0625239	3
m.21535,m.21538,m.26921	29735,29736,Pmi_655682_P	XP_022110957.1 pleckstrin homology domain-containing family D member 1-like isoform X2 [Acanthaster planci] (id=91.01%; len=467; e=0.00E+00) ,XP_022110952.1 pleckstrin homology domain-containing family D member 1-like isoform X1 [Acanthaster planci] (id=77.98%; len=554; e=0.00E+00) ,PLHD1_HUMAN_Pleckstrin_homology_domain-containing_family_D..CUT	1193	9	4.565	0.5527	0.043939	4	4	0	3					8	6	0	5	0.851622	0.875989	0.758979	0.841618	0.956862	1	1.31756	561287	576821	501453	554840	630821	659434	0.788144	0.06257	2
m.30912	Pmi_668070_Z	ZFR_DANRE_Zinc_finger_RNA-binding_protein			4.829	0.6107	0.030814	15	12	0	11	16	12	1	11	15	13	1	12	0.911262	0.96681	0.884411	0.916363	0.943965	0.988784	1.11801	1.93763e+06	2.05881e+06	1.88206e+06	1.94732e+06	2.00861e+06	2.10313e+06	0.788085	0.0626034	3
m.21946	Pmi_636591_P	PUR9_CHICK_Bifunctional_purine_biosynthesis_protein_PURH			5.953	0.7494	0.002776	110	37	0	28	175	43	0	18	182	45	0	34	0.966574	0.97118	0.955302	0.925553	0.996206	0.979533	1.07634	6.18341e+07	6.21108e+07	6.1126e+07	5.92345e+07	6.37112e+07	6.26672e+07	0.787799	0.062766	3
m.21319	Pmi_633890_R	RAB8A_MOUSE_Ras-related_protein_Rab-8A			4.358	0.5579	0.116423	4	2	1	0	12	5	3	2	10	6	2	3	0.916775	0.766956	0.929127	0.985303	0.750414	0.796973	1.31301	977427	812994	986260	1.05024e+06	795859	847374	0.787561	0.0629017	3
m.22744	Pmi_640202_A	ASGL1_MACFA_L-asparaginase			4.06	0.5511	0.02839	3	2	1	1	2	2	0	0	4	4	1	3	0.750732	0.888442	0.897294	0.870654	0.833828	1	1.33203	172779	205382	209321	201832	192008	232709	0.787276	0.0630641	3
m.26259	38216	XP_022103683.1 SNW domain-containing protein 1-like [Acanthaster planci] (id=95.15%; len=536; e=0.00E+00)			3.803	0.5235	0.25054	3	3	1	2	4	4	0	3	4	4	0	3	0.744119	0.898945	0.932007	0.865096	0.887209	0.941805	1.26566	68181.6	81981	84286.5	78873.8	80721.3	85698.8	0.787242	0.0630837	3
PMI_026263,PMI_005885		XP_022109938.1 uncharacterized protein LOC110989683 [Acanthaster planci] (id=72.20%; len=572; e=0.00E+00) ,XP_022109938.1 uncharacterized protein LOC110989683 [Acanthaster planci] (id=71.05%; len=570; e=0.00E+00)	2495	4	4.083	0.6203	0.005447					47	4	0	1	45	4	0	1	0.979766	0.720284	0.787382	0.690537	0.933284	0.907939	1.41885	4.20538e+07	3.04786e+07	3.34536e+07	2.91574e+07	3.98348e+07	3.89199e+07	0.787127	0.0631494	2
m.21059	Pmi_632750_C	CAH2_TRIHK_Carbonic_anhydrase_2			5.429	0.6489	0.077647	12	5	5	0	13	5	5	0	17	5	5	0	0.916663	0.823457	0.954489	0.882075	0.995784	0.893613	1.20927	7.66893e+06	6.84939e+06	7.993e+06	7.37638e+06	8.33436e+06	7.45526e+06	0.787004	0.0632196	3
m.52053	77651	XP_022097947.1 neuroblast differentiation-associated protein AHNAK-like [Acanthaster planci] (id=64.50%; len=293; e=1.43E-61)			5.634	0.6774	0.019012	43	12	0	0	47	15	0	0	53	16	0	0	0.936927	0.9324	0.871275	0.872873	0.928854	1	1.14774	2.72375e+07	2.7053e+07	2.52564e+07	2.52891e+07	2.68946e+07	2.9007e+07	0.786719	0.063382	3
PMI_023902,m.7160,PMI_001146,m.14521	None,11502,None,Pmi_595400_A	XP_022085410.1 cyclic AMP-dependent transcription factor ATF-6 beta-like [Acanthaster planci] (id=77.41%; len=571; e=0.00E+00) ,XP_022085410.1 cyclic AMP-dependent transcription factor ATF-6 beta-like [Acanthaster planci] (id=85.90%; len=227; e=9.72E-136) ,XP_022085410.1 cyclic AMP-dependent transcription factor ATF-6 beta-like [Acanthaster planci] (id=79.35%; len=673; e=0.00E+00) ,ATF6B_MOUSE_Cy…	1233	1	2.715	0.2941	0.046986	2	1	0	0	2	1	0	0	1	1	0	0	0.759505	0.763028	0.886965	0.981726	0.836011	0.920478	1.29259	2.01599e+06	2.01765e+06	2.32891e+06	2.60911e+06	2.21748e+06	2.43745e+06	0.786693	0.0633969	3
m.20854,m.34427	Pmi_631846_P,51705	PI16_BOVIN_Peptidase_inhibitor_16,XP_012606494.1 GLIPR1-like protein 1 [Microcebus murinus] (id=35.75%; len=207; e=9.51E-28)	1116	16	5.526	0.6723	0.000672	77	20	0	4	126	21	0	3	116	23	0	4	0.956362	0.880044	0.946167	0.998331	0.898535	0.868822	1.14906	6.0415e+07	5.54264e+07	5.97075e+07	6.32955e+07	5.68001e+07	5.48397e+07	0.786618	0.0634399	3
m.32130	Pmi_671101_C	CISY_DANRE_Citrate_synthase,_mitochondrial			5.491	0.6473	0.002182	34	19	2	14	60	19	2	14	54	21	2	15	1	0.914351	0.951688	0.946515	0.915125	0.898862	1.11252	1.87082e+07	1.71034e+07	1.78058e+07	1.77058e+07	1.71167e+07	1.68091e+07	0.786604	0.0634479	3
m.38600	58239	XP_022096529.1 ribonuclease H2 subunit A-like isoform X1 [Acanthaster planci] (id=92.58%; len=256; e=1.38E-175)			3.883	0.5543	0.004377	7	7	1	6	15	9	1	7	12	9	1	8	0.819529	0.988499	0.920323	0.897501	0.941886	0.968711	1.20618	1.6067e+06	1.93938e+06	1.80733e+06	1.76168e+06	1.84495e+06	1.89743e+06	0.786565	0.0634701	3
PMI_005465,m.25994,PMI_002278	None,Pmi_652520_P,None	XP_022108791.1 LOW QUALITY PROTEIN: U4/U6 small nuclear ribonucleoprotein Prp4-like [Acanthaster planci] (id=86.55%; len=528; e=0.00E+00) ,PRP4_MOUSE_U4/U6_small_nuclear_ribonucleoprotein_Prp4,XP_022108791.1 LOW QUALITY PROTEIN: U4/U6 small nuclear ribonucleoprotein Prp4-like [Acanthaster planci] (id=87.42%; len=501; e=0.00E+00)	164	1	2.82	0.523	0.276831	1	1	0	0	1	1	0	0	1	1	0	0	0.866083	0.649515	0.987236	0.934185	0.833953	0.773196	1.51996	42364.2	31370.4	48332.3	45473.7	41008.1	38066.3	0.786549	0.0634794	3
PMI_012528		XP_022087295.1 E3 ubiquitin-protein ligase UHRF1-like [Acanthaster planci] (id=80.15%; len=932; e=0.00E+00)			4.253	0.6184	0.117113	4	3	1	2	2	2	1	1	2	2	0	1	0.638046	0.565119	0.648725	0.82851	0.712578	1	1.76954	122144	102030	122601	158255	135397	194174	0.786302	0.0636211	3
PMI_003162		XP_022087870.1 protein HGV2-like isoform X1 [Acanthaster planci] (id=77.06%; len=170; e=8.63E-71)			4.516	0.5118	0.010115					20	6	1	0	21	5	1	0	0.77502	0.81074	0.892964	0.885545	0.875033	1	1.29029	7.81517e+06	8.1816e+06	9.01365e+06	8.92878e+06	8.84017e+06	1.01109e+07	0.785924	0.0638372	2
PMI_000201		XP_022102027.1 neutral cholesterol ester hydrolase 1-like [Acanthaster planci] (id=67.86%; len=140; e=5.04E-61)			3.063	0.4976	0.442947	2	2	0	0	3	2	0	0	3	2	0	0	0.96653	0.722564	0.845393	1	0.807332	0.778792	1.38396	401545	282102	331482	421307	320277	308442	0.785897	0.0638529	3
m.40751	61637	XP_022097082.1 39S ribosomal protein L39, mitochondrial-like [Acanthaster planci] (id=81.33%; len=316; e=0.00E+00)			3.933	0.4609	0.469027	2	1	0	0	3	2	1	1	3	2	1	1	0.832599	0.97847	0.92359	0.859391	0.958579	0.96727	1.1752	457545	537171	506791	472170	526563	531275	0.785819	0.0638974	3
m.21043	Pmi_632630_U	UBA5_BRAFL_Ubiquitin-like_modifier-activating_enzyme_5			4.43	0.6739	0.013923	6	5	2	3	9	5	3	2	11	8	3	4	0.879339	0.947382	0.876205	0.889608	0.985604	0.950198	1.12486	811521	875950	809843	821341	911512	875109	0.785657	0.0639907	3
m.15704	Pmi_603600_C	CALM_TRYBB_Calmodulin			5.24	0.6342	0.007401	23	9	0	6	34	11	0	6	30	10	0	6	0.944085	0.966057	0.971387	0.941149	0.970246	0.992042	1.05408	8.08357e+06	8.26012e+06	8.31441e+06	8.05297e+06	8.30142e+06	8.48386e+06	0.785485	0.0640896	3
PMI_015368		XP_022102471.1 transketolase-like protein 2 isoform X2 [Acanthaster planci] (id=69.65%; len=425; e=0.00E+00)			6.792	0.6991	0.004166	100	32	0	5	158	40	0	7	155	39	0	6	0.990765	0.969752	0.960208	0.939449	0.984571	0.980913	1.05462	7.115e+07	6.96629e+07	6.89567e+07	6.74719e+07	7.0698e+07	7.04734e+07	0.785063	0.0643323	3
m.43021,m.17249	64669,Pmi_613221_P	XP_022090859.1 proteasome subunit beta type-4-like [Acanthaster planci] (id=92.25%; len=258; e=1.74E-179) ,PSB4_XENLA_Proteasome_subunit_beta_type-4	1108	12	6.227	0.6611	0.046963	13	9	0	4	26	13	0	5	23	13	0	5	0.853455	0.987136	0.879038	0.802193	0.930484	0.972591	1.23055	3.98456e+06	4.60418e+06	4.09422e+06	3.73085e+06	4.33567e+06	4.5211e+06	0.78453	0.0646389	3
m.26324,PMI_023242,m.16011	Pmi_653770_F,None,21343	FA65A_RAT_Protein_FAM65A,XP_022091870.1 uncharacterized protein LOC110979963 [Acanthaster planci] (id=74.39%; len=496; e=0.00E+00) ,XP_022091870.1 uncharacterized protein LOC110979963 [Acanthaster planci] (id=89.71%; len=476; e=0.00E+00)	831	2	2.292	0.1756	0.014429	1	1	0	0	1	1	0	0	1	1	0	0	0.693709	0.899878	0.867017	0.852766	0.908654	0.958097	1.38112	220238	285755	279784	274199	287628	305766	0.78442	0.0647024	3
m.19324	25772	XP_001178256.1 PREDICTED: hydroxyacyl-thioester dehydratase type 2, mitochondrial [Strongylocentrotus purpuratus] (id=49.68%; len=157; e=1.94E-50)			3.803	0.5685	0.767884	2	2	2	0	4	3	2	1	4	3	2	1	0.888434	0.872655	0.879339	0.885841	0.894308	0.933911	1.07019	150527	147190	148402	149624	150962	157831	0.784278	0.0647846	3
m.10536	Pmi_561160_M	MLC2_DROME_Myosin-2_essential_light_chain			5.982	0.661	0.014808	18	12	12	0	34	13	13	0	30	13	13	0	0.971437	0.925768	0.93478	0.96174	0.94495	0.915052	1.06162	7.04554e+06	6.71146e+06	6.77831e+06	6.9725e+06	6.85078e+06	6.63379e+06	0.784259	0.0647958	3
m.30870	46023	XP_022093540.1 uncharacterized protein LOC110980838 isoform X2 [Acanthaster planci] (id=77.36%; len=764; e=0.00E+00)			5.345	0.6713	0.024641	12	7	1	5	18	9	1	7	18	9	1	6	0.907571	0.930379	0.920356	0.897406	0.917308	0.935378	1.04231	7.18245e+06	7.34017e+06	7.28406e+06	7.09358e+06	7.24053e+06	7.3676e+06	0.784246	0.064803	3
m.30340,m.30337,m.30343	45172,45171,45176	XP_022099080.1 cordon-bleu protein-like 1 isoform X5 [Acanthaster planci] (id=73.77%; len=122; e=8.14E-44) ,XP_022099080.1 cordon-bleu protein-like 1 isoform X5 [Acanthaster planci] (id=73.77%; len=122; e=9.91E-44) ,XP_022099075.1 cordon-bleu protein-like 1 isoform X1 [Acanthaster planci] (id=59.11%; len=225; e=7.21E-61)	767	2	3.273	0.4442	0.107432	1	1	0	0	2	2	0	0	1	1	0	0	0.92113	0.67806	0.830715	0.915584	0.81351	0.97812	1.44253	232728	170167	208453	230424	205287	246094	0.784059	0.0649111	3
m.7349	Pmi_520350_n	no_annot			5.192	0.6685	0.014495	9	4	0	2	9	4	0	2	7	4	0	2	0.930753	0.934891	0.884381	0.835165	0.973661	0.982643	1.17659	1.40101e+06	1.41054e+06	1.33178e+06	1.25518e+06	1.46548e+06	1.48189e+06	0.783938	0.0649812	3
PMI_019793		XP_022092974.1 pyruvate carboxylase, mitochondrial-like [Acanthaster planci] (id=90.65%; len=727; e=0.00E+00)			4.619	0.5215	0.020653	6	6	0	5	7	6	0	5	10	10	0	8	0.91634	0.968217	0.919926	0.946124	0.958433	0.958043	1.05661	609477	641256	611966	625928	634086	634087	0.783831	0.065043	3
m.12498,m.49198,m.49192	Pmi_579580_Z,73635,73627	ZDH14_MOUSE_Probable_palmitoyltransferase_ZDHHC14,XP_022104473.1 palmitoyltransferase ZDHHC9-like isoform X2 [Acanthaster planci] (id=92.27%; len=362; e=0.00E+00) ,XP_022104477.1 palmitoyltransferase ZDHHC9-like isoform X4 [Acanthaster planci] (id=89.69%; len=388; e=0.00E+00)	521	3	2.998	0.4143	0.043812	1	1	0	0	2	2	0	0	1	1	0	0	0.78044	0.948236	0.947172	0.846475	0.82572	0.983702	1.26045	46769.2	56358.2	56464.5	50023.2	49602.1	58476.2	0.783738	0.0650966	3
m.28187	Pmi_659850_S	SYEP_MOUSE_Bifunctional_glutamate/proline--tRNA_ligase			6.003	0.6345	0.022126	45	34	1	27	51	33	2	22	59	35	2	24	0.974234	0.956249	0.969843	0.966765	0.976563	0.961965	1.02124	8.31797e+06	8.15353e+06	8.2841e+06	8.25114e+06	8.32813e+06	8.20966e+06	0.783366	0.0653118	3
m.12939	Pmi_583650_C	CT027_XENTR_UPF0687_protein_C20orf27_homolog			4.881	0.6062	0.168428	1	1	1	0	4	3	2	1	5	4	3	1	0.762097	0.923384	0.844735	0.863229	0.92864	0.969033	1.27153	208814	252246	229817	235599	251971	265180	0.783277	0.0653638	3
m.43471	65382	XP_022083355.1 heterogeneous nuclear ribonucleoprotein A3-like [Acanthaster planci] (id=58.29%; len=187; e=1.69E-60)			6.001	0.6588	0.015053	35	14	0	12	63	16	0	14	60	15	0	13	0.918662	0.974796	0.95063	0.943484	0.987736	0.99551	1.08365	1.81439e+07	1.92444e+07	1.87748e+07	1.86234e+07	1.94958e+07	1.96422e+07	0.782606	0.0657531	3
PMI_017420,m.14412	None,Pmi_594590_S	XP_022080430.1 gamma-soluble NSF attachment protein-like [Acanthaster planci] (id=81.00%; len=300; e=4.70E-160) ,SNAG_MOUSE_Gamma-soluble_NSF_attachment_protein	2090	5	3.353	0.5538	0.168282	5	3	0	1	4	3	0	2	3	3	0	2	0.907161	0.835016	0.824569	0.86057	0.969751	0.868955	1.17607	156425	143766	142896	148924	169026	151110	0.782277	0.0659446	3
m.16996	Pmi_611630_R	RM24_DANRE_Probable_39S_ribosomal_protein_L24,_mitochondrial			4.179	0.6769	0.017481	6	5	0	0	5	4	1	3	6	4	0	0	0.881406	0.914762	0.848727	0.906057	0.93646	1	1.17823	619348	641184	594078	631816	655074	701384	0.781977	0.0661192	3
m.28033,PMI_015543,PMI_001349	Pmi_659280_D,None,None	DDX23_HUMAN_Probable_ATP-dependent_RNA_helicase_DDX23,XP_022080114.1 probable ATP-dependent RNA helicase DDX23 [Acanthaster planci] (id=90.31%; len=702; e=0.00E+00) ,XP_022080114.1 probable ATP-dependent RNA helicase DDX23 [Acanthaster planci] (id=90.31%; len=702; e=0.00E+00)	1070	13	5.047	0.5542	0.067398	7	7	0	0	9	9	0	0	7	7	0	0	0.87314	0.915804	0.848513	0.827666	0.935538	0.987795	1.19347	742739	777939	720584	703268	794285	839701	0.781793	0.0662263	3
m.30163,PMI_017822,m.17368	44930,None,Pmi_614180_E	XP_022079945.1 EF-hand calcium-binding domain-containing protein 1-like isoform X2 [Acanthaster planci] (id=89.69%; len=194; e=6.92E-128) ,XP_022079945.1 EF-hand calcium-binding domain-containing protein 1-like isoform X2 [Acanthaster planci] (id=89.84%; len=187; e=1.11E-121) ,EFCB1_XENLA_EF-hand_calcium-binding_domain-containing_protein_1	2253	4	3.669	0.5094	0.206724	3	2	0	0	2	2	0	0	6	4	0	0	0.714812	0.824959	0.925584	1	0.843365	0.870782	1.39897	263003	304141	341431	368641	310952	320271	0.78116	0.0665961	3
PMI_025990		XP_022110207.1 putative tRNA (cytidine(32)/guanosine(34)-2'-O)-methyltransferase isoform X2 [Acanthaster planci] (id=67.82%; len=348; e=3.89E-152)			4.297	0.573	0.122983	1	1	1	0	2	1	1	0					0.894267	0.677473	0.810251	0.691024	0.961698	0.963805	1.42265	17828.8	13446.9	16124.7	13657.3	19157	19129	0.781149	0.0666027	2
m.5649	Pmi_489500_C	CPVL_HUMAN_Probable_serine_carboxypeptidase_CPVL			4.973	0.6297	0.003796	27	13	4	0	26	15	6	0	28	12	5	0	0.896326	0.950577	0.91797	0.943263	0.926446	0.98004	1.0934	1.18397e+07	1.25523e+07	1.21216e+07	1.24439e+07	1.22349e+07	1.29534e+07	0.780935	0.066728	3
m.29932	44520	XP_022100182.1 sodium- and chloride-dependent neutral and basic amino acid transporter B(0+)-like [Acanthaster planci] (id=86.85%; len=707; e=0.00E+00)			3.521	0.502	0.094181	2	2	0	2	4	3	1	2	4	3	1	2	0.75907	0.864996	0.852426	0.841789	0.891937	0.958846	1.26319	207928	237367	230332	230836	242780	262967	0.780793	0.066811	3
m.21644	Pmi_635424_P	PPP5_MOUSE_Serine/threonine-protein_phosphatase_5			4.402	0.6152	0.052109	6	5	2	3	13	13	6	4	14	12	4	7	0.92963	0.917469	0.91092	0.9611	0.967354	0.953773	1.06195	1.38142e+06	1.3575e+06	1.34859e+06	1.43222e+06	1.43735e+06	1.41483e+06	0.780765	0.0668271	3
PMI_002460,m.36305	None,54655	XP_022086125.1 actin-related protein 2/3 complex subunit 2-like [Acanthaster planci] (id=89.33%; len=225; e=3.99E-142) ,XP_022086125.1 actin-related protein 2/3 complex subunit 2-like [Acanthaster planci] (id=90.67%; len=300; e=0.00E+00)	48	19	4.328	0.5502	0.042665	23	12	0	10	25	16	0	14	34	15	0	1	0.908881	0.819734	0.953129	0.99981	0.805187	0.841377	1.24171	8.85499e+06	7.96913e+06	9.26699e+06	9.72404e+06	7.8353e+06	8.19021e+06	0.780686	0.0668735	3
m.18811	Pmi_621740_S	SPEE_MOUSE_Spermidine_synthase			5.753	0.6378	0.075189	11	6	0	6	11	8	0	7	8	6	0	6	0.909491	0.983241	0.927541	0.987691	0.922212	0.97377	1.08598	2.68133e+06	2.90475e+06	2.73788e+06	2.91682e+06	2.71692e+06	2.8765e+06	0.780586	0.0669322	3
m.12692	Pmi_581290_I	IPP2_RAT_Protein_phosphatase_inhibitor_2			5.114	0.5898	0.177175	5	5	2	3	10	8	2	5	5	4	2	2	0.794563	0.879989	0.887688	0.975518	0.96275	0.975738	1.22802	683522	759424	768080	845052	835724	842539	0.780551	0.0669529	3
PMI_005994		XP_022090706.1 alpha-mannosidase 2-like [Acanthaster planci] (id=84.88%; len=1210; e=0.00E+00)			5.161	0.5456	0.032814					16	13	0	0	18	14	0	10	0.943758	0.95755	1	0.990247	0.921141	0.854482	1.1703	1.08563e+06	1.1014e+06	1.15242e+06	1.14092e+06	1.06153e+06	983664	0.780201	0.0671579	2
m.30171	Pmi_665901_C	CTBP2_HUMAN_C-terminal-binding_protein_2			5.794	0.6314	0.06769	10	8	0	8	10	10	0	9	14	12	0	10	0.873608	0.951714	0.940622	0.968216	0.930883	0.95134	1.1083	851210	931118	919391	953808	905984	929223	0.780192	0.0671632	3
m.19048,PMI_019036	Pmi_623010_S,None	SODM_HUMAN_Superoxide_dismutase_[Mn],_mitochondrial,XP_022100703.1 superoxide dismutase [Mn], mitochondrial-like [Acanthaster planci] (id=89.04%; len=219; e=2.00E-145)	1041	7	4.299	0.5805	0.081326	11	4	0	0	23	6	0	5	18	9	0	6	0.903608	0.952496	0.944822	0.992563	0.946842	0.980406	1.09844	1.09022e+07	1.1491e+07	1.13968e+07	1.19802e+07	1.14218e+07	1.18188e+07	0.780168	0.0671771	3
m.49668	74361	XP_022090845.1 DNA replication licensing factor mcm5-like [Acanthaster planci] (id=97.88%; len=330; e=0.00E+00)			5.089	0.6946	0.048796	16	10	1	0	26	17	1	0	26	16	1	0	0.970808	0.944336	0.986792	0.929873	0.925017	0.948919	1.06678	3.21966e+06	3.12083e+06	3.27182e+06	3.07417e+06	3.06237e+06	3.14039e+06	0.780042	0.067251	3
PMI_000639		XP_002596671.1 hypothetical protein BRAFLDRAFT_122038 [Branchiostoma floridae] (id=58.69%; len=305; e=4.64E-128)			5.264	0.6389	0.001827	14	9	0	0	13	10	0	0	15	13	0	0	0.887881	0.913556	0.967408	0.998282	0.959556	0.928805	1.12434	1.96541e+06	2.01512e+06	2.13898e+06	2.21456e+06	2.12904e+06	2.06145e+06	0.780011	0.0672695	3
m.20906	Pmi_632070_S	SE1L3_HUMAN_Protein_sel-1_homolog_3			1.918	0.2096	0.344858	1	1	1	0	1	1	1	0					0.702764	0.953288	0.754755	0.645075	0.949109	0.918999	1.47779	268264	363380	287684	245932	361995	351141	0.779521	0.0675577	2
m.11373,PMI_010699,PMI_024158	Pmi_569850_A,None,None	ACT_ASHGO_Actin,XP_022086939.1 actin-3-like [Acanthaster planci] (id=76.11%; len=360; e=0.00E+00) ,XP_022086939.1 actin-3-like [Acanthaster planci] (id=75.35%; len=361; e=0.00E+00)	1240	2	3.199	0.4539	1.25617					2	2	0	0	1	1	0	0	0.803298	0.937717	0.97004	0.965581	0.842589	0.955582	1.20757	88230.1	103353	107151	106351	92645.7	105090	0.779458	0.0675945	2
m.11649	16980	XP_022091040.1 serine/threonine-protein phosphatase 2A 56 kDa regulatory subunit epsilon isoform-like isoform X1 [Acanthaster planci] (id=98.05%; len=461; e=0.00E+00)			3.886	0.6423	0.051603	7	6	5	1	9	6	5	1	5	4	4	0	0.934876	0.937945	0.961471	0.919603	0.940067	0.990969	1.07761	904873	906061	929437	889849	909244	959316	0.779324	0.0676736	3
m.33805,PMI_006089,m.33808	50598,None,50600	XP_022096918.1 uncharacterized protein LOC110982623 isoform X7 [Acanthaster planci] (id=82.93%; len=668; e=0.00E+00) ,XP_022096893.1 uncharacterized protein LOC110982623 isoform X4 [Acanthaster planci] (id=68.47%; len=758; e=0.00E+00) ,XP_022096901.1 uncharacterized protein LOC110982623 isoform X5 [Acanthaster planci] (id=83.08%; len=668; e=0.00E+00)	664	5	3.846	0.4207	0.176958	1	1	0	0	3	3	0	1	3	3	0	3	0.935007	0.806177	0.797184	0.868412	0.885693	0.885687	1.17289	317907	268068	262831	290975	293866	291880	0.779247	0.067719	3
m.19498	Pmi_625151_G	GBLP_DANRE_Guanine_nucleotide-binding_protein_subunit_be..CUT			5.992	0.7056	0.001165	62	24	4	18	94	27	5	20	98	25	4	19	0.926436	0.961124	0.952685	0.919944	0.993553	0.978405	1.08001	3.1426e+07	3.26179e+07	3.23398e+07	3.12129e+07	3.37098e+07	3.32025e+07	0.779067	0.067825	3
PMI_011916		XP_022106065.1 transient-receptor-potential-like protein isoform X1 [Acanthaster planci] (id=67.29%; len=749; e=0.00E+00)			3.336	0.4623	0.104207	3	3	0	1	4	4	0	3	2	2	0	1	0.812942	0.933019	0.889474	0.819791	0.869601	0.948187	1.16636	246340	282633	266619	249970	262757	283201	0.77837	0.0682364	3
m.16091	Pmi_606191_S	STXB5_HUMAN_Syntaxin-binding_protein_5			3.231	0.3241	1.04804	1	1	1	0	1	1	1	0	1	1	1	0	0.841215	0.841428	0.897586	0.892952	0.908377	0.882266	1.07984	105815	105698	114517	111100	114889	110492	0.777874	0.0685302	3
m.26650,m.42342	Pmi_654860_K,63935	KBL_MOUSE_2-amino-3-ketobutyrate_coenzyme_A_ligase,_mitoc..CUT,XP_022086507.1 2-amino-3-ketobutyrate coenzyme A ligase, mitochondrial-like [Acanthaster planci] (id=88.60%; len=421; e=0.00E+00)	499	12	5.388	0.6516	0.005675	18	10	0	8	14	9	0	6	17	10	0	7	0.944599	0.888968	0.95245	1	0.866867	0.892965	1.15358	3.40883e+06	3.20722e+06	3.43191e+06	3.60543e+06	3.1258e+06	3.21747e+06	0.777581	0.0687038	3
PMI_000138		XP_022080005.1 transient-receptor-potential-like protein [Acanthaster planci] (id=42.84%; len=740; e=0.00E+00)			5.256	0.6196	0.001817	8	6	1	2	10	9	2	0	8	8	2	0	1	0.843195	0.818707	0.834932	0.762246	0.785115	1.31191	1.01067e+06	849289	819201	833502	760919	784343	0.777491	0.0687574	3
m.14991,m.14993	20421,20422	XP_022095874.1 cGMP-dependent protein kinase 1-like [Acanthaster planci] (id=88.14%; len=624; e=0.00E+00) ,XP_022095874.1 cGMP-dependent protein kinase 1-like [Acanthaster planci] (id=90.46%; len=608; e=0.00E+00)	1480	6	3.363	0.3415	0.260313	3	3	0	3	7	6	0	4	5	5	0	5	0.858701	0.873336	0.95898	0.874628	0.917637	0.930338	1.11678	234097	237938	261988	238978	250329	253277	0.777389	0.0688178	3
PMI_027847		XP_022098938.1 crystallin J1A-like isoform X2 [Acanthaster planci] (id=69.28%; len=153; e=1.13E-71)			6.213	0.6169	0.009334					41	14	5	0	34	10	3	0	0.899242	0.927965	0.853977	0.807863	0.990995	0.953407	1.22669	1.92487e+07	1.98534e+07	1.82441e+07	1.72784e+07	2.12202e+07	2.03798e+07	0.776722	0.0692142	2
m.20150	Pmi_628250_n	no_annot			5.458	0.7354	0.002976	92	16	1	13	130	15	1	0	145	15	1	0	0.98089	0.96181	0.976128	0.986897	0.953653	0.977788	1.03486	1.96795e+08	1.92986e+08	1.9582e+08	1.97978e+08	1.91294e+08	1.96134e+08	0.776266	0.0694854	3
m.2051	Pmi_365530_M	MIF_RAT_Macrophage_migration_inhibitory_factor			5.052	0.6136	0.009719	12	6	0	6	12	6	0	5	13	8	0	7	0.989655	0.64896	0.919354	0.93915	0.731603	0.689889	1.52499	3.93687e+06	2.58242e+06	3.65052e+06	3.73669e+06	2.89509e+06	2.73477e+06	0.775966	0.0696645	3
m.24414,PMI_021782	Pmi_646670_D,None	DD3_DICDI_Protein_DD3-3,XP_022106439.1 protein DD3-3-like [Acanthaster planci] (id=86.15%; len=650; e=0.00E+00)	1867	8	3.308	0.4362	0.229826	5	5	0	4	4	4	0	3	4	4	0	3	0.838055	0.934515	0.915785	0.905943	0.932282	0.901886	1.1151	430205	475706	467563	464490	477279	461935	0.775852	0.0697326	3
m.44449,m.17234	66681,Pmi_613270_S	XP_022105731.1 SPARC-like [Acanthaster planci] (id=81.55%; len=309; e=0.00E+00) ,SPRC_COTJA_SPARC	2490	4	2.996	0.4183	0.088769	3	3	0	2	3	2	0	0	3	2	0	1	0.906473	0.889195	0.768549	0.696227	0.976429	0.910536	1.40246	151228	147920	127470	112447	164613	149979	0.775818	0.0697526	3
PMI_002594,m.15555	None,Pmi_602630_M	XP_022101334.1 mitotic spindle assembly checkpoint protein MAD2A-like [Acanthaster planci] (id=85.92%; len=206; e=6.52E-130) ,MD2L1_HUMAN_Mitotic_spindle_assembly_checkpoint_protein_MAD2A	654	2	2.447	0.3656	0.746886	2	2	0	0	1	1	0	0					0.702946	0.776261	0.837372	1	0.758064	0.913859	1.42258	39135.4	43020.3	46667.3	55811.4	42200.8	51083.9	0.775685	0.0698326	2
PMI_013709		XP_022087543.1 erlin-1-like [Acanthaster planci] (id=92.52%; len=321; e=0.00E+00)			4.897	0.645	0.009021	32	20	3	17	31	20	4	15	32	22	4	16	0.969236	0.878062	0.906964	0.959013	0.929312	0.871729	1.11185	1.05283e+07	9.52299e+06	9.83368e+06	1.04385e+07	1.00313e+07	9.47191e+06	0.775566	0.0699035	3
PMI_021464		XP_022102793.1 hydroxysteroid dehydrogenase-like protein 2 [Acanthaster planci] (id=84.25%; len=419; e=0.00E+00)			6.266	0.6704	0.008879	39	20	3	13	44	21	3	4	50	24	3	5	0.979436	0.995022	0.9822	0.967866	0.963793	0.951161	1.04611	1.28697e+07	1.30803e+07	1.29092e+07	1.27162e+07	1.26617e+07	1.24935e+07	0.775502	0.069942	3
PMI_019922		XP_022091650.1 V-type proton ATPase subunit B [Acanthaster planci] (id=99.00%; len=498; e=0.00E+00)			5.767	0.6494	0.001721	41	25	25	0	53	28	28	0	65	31	31	0	0.912985	0.937306	0.892754	0.894922	0.981457	0.981221	1.09936	1.39621e+07	1.43318e+07	1.36564e+07	1.36944e+07	1.50214e+07	1.49963e+07	0.775358	0.0700277	3
PMI_003219		XP_022083167.1 cilia- and flagella-associated protein 61-like [Acanthaster planci] (id=83.19%; len=458; e=0.00E+00)			4.477	0.625	0.304563					1	1	1	0	4	4	1	2	0.77867	0.985325	0.532863	0.783354	0.926954	0.838677	1.84911	76362.7	96944.2	51507.9	76518	90922.3	82255.9	0.774896	0.0703042	2
PMI_016234,m.24247	None,Pmi_645793_P	XP_022085436.1 proteasome subunit beta type-6-like isoform X1 [Acanthaster planci] (id=96.95%; len=197; e=3.57E-138) ,PSB6_HUMAN_Proteasome_subunit_beta_type-6	2161	13	5.1	0.6325	0.032702	16	10	0	7	28	15	0	9	24	15	0	10	0.942871	0.990946	0.990222	0.935611	0.959075	0.951535	1.05914	5.97983e+06	6.29313e+06	6.29185e+06	5.94781e+06	6.09043e+06	6.04081e+06	0.774696	0.0704247	3
PMI_019622		XP_022080175.1 sortilin-related receptor-like isoform X1 [Acanthaster planci] (id=49.19%; len=742; e=0.00E+00)			6.493	0.6988	0.020425	23	11	0	0	37	11	0	0	37	11	0	0	0.801808	0.930845	0.896155	0.938001	0.891689	1	1.24718	7.79116e+06	9.08876e+06	8.74266e+06	9.14524e+06	8.68516e+06	9.77985e+06	0.774128	0.0707653	3
m.21769	Pmi_635891_H	HPCL1_RAT_Hippocalcin-like_protein_1			3.129	0.5036	0.042923	3	3	1	2	2	2	0	1	3	3	0	2	0.946853	0.689541	0.876848	0.960051	0.696718	0.689028	1.39334	350688	248963	325085	360938	245603	243390	0.774012	0.070835	3
PMI_003422,m.28378,PMI_018430	None,Pmi_660333_R,None	XP_022101628.1 39S ribosomal protein L23, mitochondrial-like [Acanthaster planci] (id=60.27%; len=151; e=3.12E-57) ,RM23_OTOGA_39S_ribosomal_protein_L23,_mitochondrial,XP_022101628.1 39S ribosomal protein L23, mitochondrial-like [Acanthaster planci] (id=64.90%; len=151; e=3.54E-64)	2549	2	3.474	0.4364	0.409583	1	1	0	0	2	2	0	0	1	1	0	0	0.569244	0.699823	0.744236	0.832734	0.752659	0.876415	1.53961	95205.3	117071	123634	139145	124883	144632	0.774007	0.0708381	3
m.21118	Pmi_632792_P	PA2G4_MOUSE_Proliferation-associated_protein_2G4			6.148	0.6881	0.007286	52	24	2	20	113	35	3	29	100	33	3	27	0.956412	0.970705	0.914778	0.882108	0.975326	0.984479	1.11605	3.35209e+07	3.40049e+07	3.20555e+07	3.09162e+07	3.4157e+07	3.45054e+07	0.773926	0.0708868	3
PMI_022154		XP_022100818.1 small acidic protein-like isoform X1 [Acanthaster planci] (id=62.72%; len=279; e=6.39E-94)			3.422	0.3982	0.140045	6	4	0	0	5	4	0	0	5	5	1	0	0.737584	0.879159	0.781499	0.906983	0.882442	0.976159	1.32345	367880	440628	389697	452066	441125	489041	0.77332	0.0712519	3
PMI_001696		XP_022096293.1 eIF-2-alpha kinase activator GCN1-like [Acanthaster planci] (id=73.09%; len=2572; e=0.00E+00)			5.142	0.6361	0.006683	63	43	1	4	70	52	1	5	75	55	2	7	0.925833	0.972101	0.952863	0.959755	0.967318	0.994981	1.07469	1.04825e+07	1.09856e+07	1.0772e+07	1.08615e+07	1.09286e+07	1.12473e+07	0.773249	0.071295	3
m.31965	Pmi_670644_A	AMACR_RAT_Alpha-methylacyl-CoA_racemase			4.676	0.5474	0.013242	9	8	0	0	13	10	0	9	11	10	0	10	0.894557	0.921121	0.892151	0.934841	0.970529	0.986966	1.10628	1.50479e+06	1.55055e+06	1.5e+06	1.5757e+06	1.63443e+06	1.66167e+06	0.773132	0.0713651	3
PMI_015047,m.20054	None,Pmi_627931_C	XP_022082440.1 ER membrane protein complex subunit 8-like [Acanthaster planci] (id=87.50%; len=136; e=6.56E-84) ,CX4NB_BOVIN_Neighbor_of_COX4	1987	2	4.709	0.603	0.0307	3	2	0	0	4	2	0	0	6	2	0	0	0.863806	0.933131	0.892801	0.827645	0.920442	0.991801	1.19834	831266	894525	860232	788429	882694	952162	0.772904	0.071503	3
PMI_022262,PMI_019137,m.10209,m.31331,m.31327,PMI_010539	None,None,Pmi_557200_D,46867,46865,None	XP_022091276.1 trans-1,2-dihydrobenzene-1,2-diol dehydrogenase-like [Acanthaster planci] (id=72.70%; len=359; e=0.00E+00) ,XP_022091276.1 trans-1,2-dihydrobenzene-1,2-diol dehydrogenase-like [Acanthaster planci] (id=71.31%; len=359; e=0.00E+00) ,DHDH_DANRE_Trans-1,2-dihydrobenzene-1,2-diol_dehydrogenase,XP_022091276.1 trans-1,2-dihydrobenzene-1,2-diol dehydrogenase-like [Acanthaster planci] (id=7…	1855	1	2.557	0.2558	0.361909	1	1	0	0					1	1	0	0	0.66392	0.725899	0.736353	0.782786	0.888862	1	1.50621	47524.1	51970.3	52587.4	55967.8	64063	71740	0.772739	0.0716023	2
m.27485	40002	XP_022106109.1 putative glucose-6-phosphate 1-epimerase [Acanthaster planci] (id=91.64%; len=275; e=0.00E+00)			6.101	0.6831	0.012341	13	8	0	4	15	9	0	6	19	13	0	9	0.904519	0.995996	0.901736	0.807228	0.94768	0.946416	1.23385	2.45547e+06	2.70514e+06	2.44442e+06	2.18738e+06	2.57109e+06	2.56779e+06	0.772312	0.0718607	3
m.25028	Pmi_648912_S	SORL_RABIT_Sortilin-related_receptor			5.743	0.6974	0.000872	7	5	1	2	8	5	1	2	10	9	1	4	0.892376	0.963863	0.943656	0.932587	0.9276	0.976465	1.09423	355067	383519	376156	371207	368497	388970	0.772113	0.0719813	3
PMI_004281		XP_022109180.1 elongation factor 1-beta-like [Acanthaster planci] (id=80.09%; len=231; e=5.12E-108)			5.012	0.6292	0.030632					76	20	2	0	76	18	1	0	0.879277	0.966261	0.90832	0.90875	0.959868	0.997105	1.13401	2.23595e+07	2.45678e+07	2.30932e+07	2.31078e+07	2.44029e+07	2.53475e+07	0.771524	0.0723384	2
PMI_006773		XP_022099451.1 nuclear pore membrane glycoprotein 210-like isoform X1 [Acanthaster planci] (id=85.05%; len=883; e=0.00E+00)			5.862	0.6796	0.013946	22	13	1	11	23	17	1	14	23	16	1	13	0.910823	0.904801	0.920324	0.979126	0.911554	0.918221	1.08215	2.37473e+06	2.35518e+06	2.3925e+06	2.54346e+06	2.3696e+06	2.39174e+06	0.77107	0.0726143	3
PMI_002771,m.22069	None,Pmi_637021_C	XP_022103255.1 COP9 signalosome complex subunit 6-like [Acanthaster planci] (id=95.03%; len=322; e=0.00E+00) ,CSN6_BOVIN_COP9_signalosome_complex_subunit_6	571	7	6.609	0.6836	0.015049	6	5	0	0	8	4	0	0	6	5	0	0	0.892137	0.958649	0.901303	0.904549	0.982654	0.955285	1.10146	1.01584e+06	1.08965e+06	1.02514e+06	1.03256e+06	1.11649e+06	1.087e+06	0.77079	0.0727846	3
PMI_019527		XP_022084584.1 heterogeneous nuclear ribonucleoprotein A1-like 2, partial [Acanthaster planci] (id=70.32%; len=347; e=3.09E-109)			2.617	0.3721	0.306309	2	2	1	0	2	2	1	0	2	2	1	0	0.842824	0.798039	0.901069	0.895261	0.971601	0.979736	1.22768	296149	280490	316718	314502	341709	344513	0.770359	0.0730477	3
PMI_011856		ACM80366.1 vasa [Patiria miniata] (id=99.44%; len=533; e=0.00E+00)			4.497	0.6801	0.007758	32	20	2	11	46	25	2	12	40	25	2	12	0.935877	0.903769	0.913118	0.903726	0.969417	1	1.10653	1.12483e+07	1.08666e+07	1.09743e+07	1.08627e+07	1.16489e+07	1.20206e+07	0.769894	0.073331	3
m.24340	Pmi_646352_V	VPS4B_HUMAN_Vacuolar_protein_sorting-associated_protein_4B			4.705	0.6123	0.062465	14	9	0	0	21	14	1	12	18	13	1	12	0.892667	0.974912	0.891426	0.901202	0.985206	0.996279	1.11762	4.10049e+06	4.47654e+06	4.09389e+06	4.13909e+06	4.52544e+06	4.5757e+06	0.769693	0.0734539	3
PMI_013427		XP_022086121.1 xanthine dehydrogenase/oxidase-like isoform X1 [Acanthaster planci] (id=86.27%; len=415; e=0.00E+00)			2.82	0.3738	0.027933	1	1	0	0					4	4	1	3	0.866101	0.963329	0.928551	0.870341	0.967341	1	1.1546	146185	162633	156780	146782	163266	168734	0.769457	0.0735985	2
PMI_023904		XP_022103862.1 rasGAP-activating-like protein 1 isoform X4 [Acanthaster planci] (id=91.63%; len=514; e=0.00E+00)			3.514	0.5025	0.451263	1	1	0	0	4	4	0	4	2	2	0	2	0.919618	0.849438	0.907618	0.912573	0.909354	0.894108	1.08262	156563	139511	153862	158825	150334	150132	0.768968	0.0738977	3
m.10857,PMI_001627,PMI_010515	Pmi_564850_T,None,None	TMCO1_HUMAN_Transmembrane_and_coiled-coil_domain-containin..CUT,XP_022085220.1 calcium load-activated calcium channel-like [Acanthaster planci] (id=95.62%; len=137; e=1.47E-94) ,XP_022085220.1 calcium load-activated calcium channel-like [Acanthaster planci] (id=91.95%; len=174; e=2.20E-113)	1279	3	3.843	0.3946	0.111965	2	2	0	0	2	1	0	0	2	1	0	0	0.842051	0.82802	0.917214	0.94464	0.864062	0.995426	1.20218	85032.3	83991.1	92669.7	95464.4	87566	100793	0.768944	0.0739127	3
PMI_007998,PMI_012585,m.19402,m.31888	None,None,Pmi_624740_U,47636	XP_022098880.1 ufm1-specific protease 2-like [Acanthaster planci] (id=80.38%; len=627; e=0.00E+00) ,XP_022098880.1 ufm1-specific protease 2-like [Acanthaster planci] (id=81.50%; len=627; e=0.00E+00) ,UFSP2_MOUSE_Ufm1-specific_protease_2,XP_022098880.1 ufm1-specific protease 2-like [Acanthaster planci] (id=77.51%; len=458; e=0.00E+00)	2389	1	2.739	0.2691	0.444395					1	1	0	0	1	1	0	0	0.832324	0.99303	0.973083	0.903726	0.822439	0.950642	1.20742	130039	155118	152224	141514	128407	148402	0.768746	0.0740344	2
m.30642	Pmi_667261_C	CC032_HUMAN_Uncharacterized_protein_C3orf32			4.783	0.6209	0.089084	4	3	3	0	11	9	9	0	13	8	8	0	0.921507	0.968109	0.882974	0.919781	0.938356	0.985236	1.11582	1.08497e+06	1.14029e+06	1.04227e+06	1.08113e+06	1.10294e+06	1.16008e+06	0.768733	0.0740422	3
m.17348	22704	XP_022083098.1 ERO1-like protein beta isoform X3 [Acanthaster planci] (id=83.65%; len=477; e=0.00E+00)			3.731	0.6073	0.19381	3	3	1	2	3	3	1	2	3	3	1	2	0.917052	0.722181	0.911113	0.951791	0.924255	0.902234	1.31794	216303	169864	216625	224231	217671	212028	0.768675	0.0740778	3
m.15154	Pmi_599960_S	ST38L_HUMAN_Serine/threonine-protein_kinase_38-like			3.346	0.4426	0.10957	5	4	0	4	5	4	0	4	3	3	1	2	0.834636	0.908189	0.876346	0.947111	0.910223	0.938236	1.13476	252903	275108	265500	288093	276681	285847	0.768365	0.0742677	3
m.26078	Pmi_652821_C	CND1_XENLA_Condensin_complex_subunit_1			4.634	0.5429	0.098418	1	1	0	0	7	6	1	5	2	2	1	1	0.787123	0.85249	0.952245	0.836409	0.845514	0.798619	1.20978	128679	138945	151774	135662	139096	131615	0.768257	0.0743346	3
m.12643	Pmi_581000_S	SURF1_MOUSE_Surfeit_locus_protein_1			3.086	0.5641	0.278689					4	3	1	2	4	3	1	2	0.73212	0.769977	0.74508	1	0.70142	0.754118	1.42568	296310	311134	300586	403957	283696	303618	0.768136	0.0744085	2
m.13674	Pmi_589320_T	THOC1_HUMAN_THO_complex_subunit_1			3.923	0.4576	0.298007	3	3	0	2	3	3	0	1	4	4	0	1	0.900702	0.919071	0.929349	0.957837	0.949714	0.983977	1.09246	118109	121073	122337	125513	124733	129306	0.767659	0.0747024	3
PMI_004322,PMI_012164		XP_022086734.1 rac GTPase-activating protein 1-like isoform X2 [Acanthaster planci] (id=85.90%; len=695; e=0.00E+00) ,XP_022086734.1 rac GTPase-activating protein 1-like isoform X2 [Acanthaster planci] (id=85.13%; len=632; e=0.00E+00)	1372	3	2.349	0.2261	0.280292	1	1	0	0	1	1	0	0	1	1	0	0	0.927307	0.974652	0.857859	0.948958	0.848077	0.996218	1.17468	119077	125411	110429	122609	109418	128449	0.767394	0.0748657	3
PMI_018551		XP_022096812.1 ATP-citrate synthase-like isoform X2 [Acanthaster planci] (id=81.36%; len=1003; e=0.00E+00)			5.366	0.5986	0.011019	20	15	0	0	37	28	0	0	32	23	0	0	0.977412	0.960734	0.958773	0.96815	0.968068	0.969981	1.01944	4.07324e+06	4.00324e+06	3.99516e+06	4.03407e+06	4.03686e+06	4.04258e+06	0.767386	0.0748704	3
m.42940,m.18144	64534,Pmi_618200_A	XP_022087673.1 alcohol dehydrogenase class-3 chain L-like isoform X3 [Acanthaster planci] (id=91.51%; len=377; e=0.00E+00) ,ADHX_SPAAU_Alcohol_dehydrogenase_class-3	2496	20	5.781	0.6983	0.004465	58	20	0	14	78	21	0	14	83	23	0	15	0.889255	0.917376	0.880903	0.90545	0.954518	0.997095	1.1319	3.10105e+07	3.20462e+07	3.0725e+07	3.15955e+07	3.32973e+07	3.48627e+07	0.767245	0.0749576	3
PMI_016312		XP_022093121.1 basic proline-rich protein-like isoform X1 [Acanthaster planci] (id=79.71%; len=488; e=0.00E+00)			3.891	0.5682	0.206774	2	2	0	2	2	2	0	1					0.591077	0.722395	0.828992	1	0.859156	0.860148	1.69183	500678	609829	697000	854120	733255	725438	0.767111	0.0750406	2
m.40674	61481	XP_011681217.1 PREDICTED: MYCBP-associated protein isoform X3 [Strongylocentrotus purpuratus] (id=57.88%; len=850; e=0.00E+00)			3.334	0.4214	0.466724	3	3	2	1					1	1	1	0	0.87449	0.763865	0.840815	0.987812	0.969305	0.953546	1.29318	193424	169012	185662	217275	212407	208979	0.766885	0.0751796	2
m.16090	Pmi_606230_P	PDIA6_CAEEL_Probable_protein_disulfide-isomerase_A6			4.232	0.5553	0.024784	17	10	3	0	26	12	3	0	26	10	3	0	0.958881	0.961902	0.936366	0.94905	0.984291	0.918535	1.07159	1.58237e+07	1.5881e+07	1.54492e+07	1.56533e+07	1.6252e+07	1.51483e+07	0.766466	0.0754387	3
PMI_024245		XP_022800474.1 ADP-ribosylation factor 1-like [Stylophora pistillata] (id=57.30%; len=363; e=3.59E-124)			5.69	0.5883	0.026011	21	10	5	0	38	14	6	2	39	15	7	2	0.914929	0.982274	0.896659	0.91781	0.973706	0.988682	1.10263	1.57473e+07	1.68929e+07	1.54362e+07	1.58018e+07	1.67396e+07	1.69985e+07	0.76637	0.0754986	3
m.57551	86387	XP_022088423.1 uncharacterized protein LOC110978061 isoform X2 [Acanthaster planci] (id=87.05%; len=139; e=1.54E-79)			2.957	0.3473	0.411107	1	1	1	0	2	2	2	0	1	1	1	0	0.557368	0.548558	0.422189	0.532766	0.591635	0.602024	1.42596	64163.6	70092.1	45128.6	67170.6	72969.6	60396.7	0.766302	0.0755405	3
m.21282	29301	XP_022107143.1 CAD protein-like isoform X1 [Acanthaster planci] (id=95.11%; len=777; e=0.00E+00)			5.451	0.6167	0.001307	46	25	2	7	65	28	3	7	65	30	2	7	0.981531	0.908756	0.995989	0.992981	0.938095	0.931044	1.09599	1.97107e+07	1.82487e+07	1.99993e+07	1.99404e+07	1.88365e+07	1.86956e+07	0.766074	0.075682	3
PMI_020328		XP_022091931.1 cyclin-D1-binding protein 1 homolog isoform X1 [Acanthaster planci] (id=70.00%; len=300; e=2.32E-140)			2.338	0.3171	0.66629	2	2	1	1	1	1	0	0	1	1	0	0	0.780564	0.966732	0.750871	0.818839	0.981978	0.920837	1.30778	59075.7	73156.4	56753.2	61793.9	74184.4	69843.7	0.766033	0.0757069	3
PMI_028623,m.49842	None,74624	ANN83871.1 beta-tubulin [Patiria miniata] (id=98.66%; len=447; e=0.00E+00) ,ANN83871.1 beta-tubulin [Patiria miniata] (id=98.66%; len=447; e=0.00E+00)	666	9	7.159	0.6948	0.00196	198	36	0	21	307	36	0	17	305	38	0	16	0.963133	0.968014	0.950415	0.913736	0.99983	0.942697	1.09422	1.22133e+08	1.22767e+08	1.20583e+08	1.1589e+08	1.26825e+08	1.19549e+08	0.765978	0.075741	3
PMI_000363		XP_022082206.1 serine/threonine-protein kinase OSR1-like [Acanthaster planci] (id=84.81%; len=428; e=0.00E+00)			4.068	0.5944	0.000937	8	6	0	4	10	7	1	4	9	8	0	4	0.921451	0.943443	0.927104	0.952945	0.991307	0.95933	1.07581	1.54313e+06	1.58003e+06	1.55035e+06	1.59428e+06	1.66077e+06	1.60722e+06	0.765817	0.0758411	3
m.17967	23602	XP_022080060.1 ATPase family AAA domain-containing protein 1-like [Acanthaster planci] (id=90.11%; len=374; e=0.00E+00)			4.869	0.6434	0.036925	4	4	1	3	8	7	2	5	8	7	2	5	0.864647	0.948647	0.937161	0.893886	0.964058	0.987636	1.14224	999723	1.09487e+06	1.08298e+06	1.03048e+06	1.11376e+06	1.14373e+06	0.765695	0.0759169	3
m.29750	Pmi_664681_n	no_annot			5.792	0.6461	0.00718	86	23	6	2	116	31	7	2	127	33	8	2	0.936196	0.9983	0.95146	0.923767	0.993167	0.97242	1.08068	3.82826e+07	4.08194e+07	3.88993e+07	3.77743e+07	4.06102e+07	3.97642e+07	0.765675	0.075929	3
PMI_027384		XP_022109893.1 erythrocyte band 7 integral membrane protein-like [Acanthaster planci] (id=88.69%; len=168; e=5.16E-109)			3.549	0.5094	0.03729	8	5	0	2					8	4	0	2	0.981427	0.70569	0.93714	0.887136	0.748531	0.751958	1.39073	3.91411e+06	2.81285e+06	3.74795e+06	3.53483e+06	2.97931e+06	2.99092e+06	0.765658	0.0759399	2
PMI_005419,m.23686	None,Pmi_643794_T	XP_022102176.1 T-complex protein 1 subunit zeta-like [Acanthaster planci] (id=95.30%; len=532; e=0.00E+00) ,TCPZ_BOVIN_T-complex_protein_1_subunit_zeta	2140	35	6.997	0.6691	0.011794	56	26	0	21	99	36	0	28	94	40	0	30	0.944506	0.997269	0.929713	0.949766	0.960881	0.978488	1.07266	2.5986e+07	2.7446e+07	2.55863e+07	2.61397e+07	2.64348e+07	2.69259e+07	0.765596	0.0759785	3
m.12298,m.11038,PMI_006728	17700,Pmi_566630_S,None	XP_022087537.1 stomatin-like protein 1 [Acanthaster planci] (id=83.64%; len=275; e=5.46E-166) ,STML1_HUMAN_Stomatin-like_protein_1,XP_022087537.1 stomatin-like protein 1 [Acanthaster planci] (id=73.56%; len=450; e=0.00E+00)	935	1	3.999	0.5014	0.082266	2	1	0	0	1	1	0	0					0.759285	0.771003	1	0.788968	0.767013	0.826173	1.31703	28603.6	29045.4	37688.4	29728.3	28906.5	31130.4	0.765412	0.0760926	2
m.23412	Pmi_642810_P	PYG1A_XENLA_CTP_synthase_1-A			4.336	0.5604	0.041934	12	10	4	6	19	12	4	7	16	12	5	5	0.94481	0.974356	0.962886	0.946191	0.976765	0.969848	1.03382	2.57565e+06	2.6557e+06	2.62603e+06	2.57977e+06	2.66325e+06	2.64407e+06	0.765296	0.0761645	3
m.9958,m.25260,PMI_013462	Pmi_554441_P,36279,None	PHF10_HUMAN_PHD_finger_protein_10,XP_022097969.1 uncharacterized protein LOC110983210 isoform X2 [Acanthaster planci] (id=86.06%; len=545; e=0.00E+00) ,XP_022097969.1 uncharacterized protein LOC110983210 isoform X2 [Acanthaster planci] (id=85.84%; len=339; e=0.00E+00)	1736	2	2.999	0.5149	0.127678	1	1	0	0					1	1	0	0	0.791436	0.959304	0.820362	0.868187	0.883799	0.989534	1.2503	44095.6	53906.7	45833.5	48614.9	49949.2	55996.6	0.765185	0.0762333	2
m.35718,PMI_018104	53837,None	53837|g.35718 type:complete len:106 gc:universal 53837:539-222(-),XP_022099832.1 uncharacterized protein LOC110984202 [Acanthaster planci] (id=84.00%; len=100; e=4.71E-55)	982	1	2.265	0.1874	0.149879	1	1	0	0	1	1	0	0	2	1	0	0	0.647998	0.70257	0.739553	0.918308	0.826428	0.903174	1.41715	6.46366e+06	7.07917e+06	7.37089e+06	9.13396e+06	8.31508e+06	9.0138e+06	0.765003	0.076347	3
PMI_011267		XP_022090036.1 protein ELYS-like [Acanthaster planci] (id=61.41%; len=767; e=0.00E+00)			4.112	0.4846	0.15673	9	7	1	4	7	6	1	2	8	7	0	3	0.9313	0.749928	0.709067	0.907491	0.878057	0.987446	1.3926	389527	313968	297506	383203	368350	415222	0.764862	0.0764345	3
m.11499	Pmi_570980_I	IDI1_BOVIN_Isopentenyl-diphosphate_Delta-isomerase_1			3.581	0.5392	0.007938	9	7	1	6	10	6	1	5	7	6	1	5	0.855394	0.953839	0.917925	0.921137	0.962174	1	1.16905	1.58523e+06	1.76951e+06	1.70357e+06	1.70768e+06	1.78427e+06	1.85317e+06	0.764748	0.0765056	3
PMI_000392		XP_022084528.1 glucosamine-6-phosphate isomerase 2-like [Acanthaster planci] (id=92.86%; len=280; e=0.00E+00)			5.886	0.6582	0.281368	5	5	1	0	9	8	2	5	7	6	3	3	0.873533	0.802474	0.850744	0.903332	0.739005	0.77542	1.22236	647194	579770	639109	680616	543396	559506	0.764741	0.0765095	3
PMI_005510		XP_022103395.1 3-ketodihydrosphingosine reductase-like [Acanthaster planci] (id=70.37%; len=324; e=2.17E-157)			3.388	0.5026	0.069771	1	1	0	0	3	3	0	2	1	1	0	0	0.821962	0.843441	0.903166	0.842743	0.891388	1	1.2166	204170	208480	225407	208618	220772	248411	0.764489	0.076667	3
PMI_009118		XP_022098640.1 propionyl-CoA carboxylase beta chain, mitochondrial-like [Acanthaster planci] (id=81.48%; len=540; e=0.00E+00)			4.903	0.607	0.064746	15	12	2	3	22	14	1	6	22	17	2	6	0.91265	0.995843	0.907763	0.889048	0.975733	0.971539	1.12012	3.12286e+06	3.40633e+06	3.10655e+06	3.03863e+06	3.33241e+06	3.32145e+06	0.764439	0.0766978	3
m.39036	58988	XP_020625045.1 ADP-ribosylation factor 1 [Orbicella faveolata] (id=95.51%; len=178; e=1.14E-121)			5.177	0.6544	0.026011	27	12	5	6	36	15	4	9	41	16	5	9	0.896151	0.967986	0.904676	0.923305	0.988524	0.984283	1.10308	1.49415e+07	1.60842e+07	1.51283e+07	1.54332e+07	1.64498e+07	1.63584e+07	0.764355	0.0767503	3
PMI_002544,m.29439,m.29444,m.25120	None,43724,43731,Pmi_649332_B	XP_022087888.1 ribosome biogenesis protein BRX1 homolog isoform X2 [Acanthaster planci] (id=91.35%; len=312; e=0.00E+00) ,XP_022087888.1 ribosome biogenesis protein BRX1 homolog isoform X2 [Acanthaster planci] (id=91.35%; len=312; e=0.00E+00) ,XP_022087888.1 ribosome biogenesis protein BRX1 homolog isoform X2 [Acanthaster planci] (id=91.35%; len=312; e=0.00E+00) ,BRX1_BOVIN_Ribosome_biogenesis_pr…	693	2	3.376	0.4268	0.960651	1	1	0	0	2	2	0	1	2	2	0	1	0.865137	0.980835	0.908886	0.922646	0.87592	0.903934	1.13373	138247	156970	144808	148910	140985	145070	0.764223	0.0768326	3
m.31682	Pmi_669981_T	TSEAR_HUMAN_Protein_TSPEAR			6.046	0.6911	0.08221	18	7	1	5	23	9	0	8	25	9	1	7	0.9637	0.975149	0.988854	0.86618	0.922801	0.892802	1.14163	6.23944e+06	6.30951e+06	6.40172e+06	5.61034e+06	5.97143e+06	5.77329e+06	0.76401	0.0769653	3
m.33392,m.24026	49935,Pmi_645080_T	XP_022085762.1 UPF0676 protein C1494.01-like [Acanthaster planci] (id=75.37%; len=268; e=1.47E-150) ,TMX2_MOUSE_Thioredoxin-related_transmembrane_protein_2	1035	4	3.239	0.5095	0.028697	3	3	0	2	3	3	0	2	5	4	0	0	0.907429	0.897392	0.973472	1	0.909207	0.94235	1.11434	359336	355031	385497	396139	360226	373182	0.763846	0.0770683	3
m.18265	Background_P	DCTD_PONAB_Deoxycytidylate_deaminase			5.422	0.6176	0.01396	9	8	3	5	15	10	4	6	14	9	3	6	0.889485	0.938803	0.913592	0.928455	0.946855	0.959623	1.07885	3.04036e+06	3.18172e+06	3.11952e+06	3.19822e+06	3.22608e+06	3.26439e+06	0.763791	0.0771021	3
m.35788,m.31972	53873,Pmi_670521_R	XP_022084676.1 60S ribosomal protein L4-like [Acanthaster planci] (id=93.08%; len=390; e=0.00E+00) ,RL4_URECA_60S_ribosomal_protein_L4	2182	28	5.624	0.6996	0.007566	60	26	0	20	94	32	0	22	87	27	0	20	0.967106	0.978491	0.941394	0.921707	1	0.972424	1.08494	4.0376e+07	4.08499e+07	3.93741e+07	3.84898e+07	4.17685e+07	4.0604e+07	0.763381	0.0773587	3
PMI_014589		XP_022084746.1 la-related protein 1B-like isoform X1 [Acanthaster planci] (id=73.52%; len=1314; e=0.00E+00)			3.831	0.5733	0.015527	9	7	1	6	11	11	0	10	10	8	1	7	0.856946	0.912941	0.940464	0.888421	0.963041	0.984457	1.1488	476598	507074	522140	491663	532448	545874	0.762552	0.0778785	3
m.46639,m.22234,m.46627	69800,Pmi_637980_K,69793	XP_022087492.1 calcium/calmodulin-dependent protein kinase type II delta chain-like [Acanthaster planci] (id=91.25%; len=503; e=0.00E+00) ,KCC2D_PIG_Calcium/calmodulin-dependent_protein_kinase_ty..CUT,XP_022087492.1 calcium/calmodulin-dependent protein kinase type II delta chain-like [Acanthaster planci] (id=92.25%; len=503; e=0.00E+00)	1525	20	5.595	0.6813	0.010319	26	14	0	6	25	16	0	5	23	14	0	8	0.910092	0.970701	0.885776	0.86064	0.959833	0.984379	1.14378	6.07994e+06	6.48195e+06	5.91651e+06	5.74589e+06	6.40729e+06	6.57394e+06	0.762455	0.0779392	3
m.37292	56324	XP_022109279.1 prohibitin-2-like [Acanthaster planci] (id=94.67%; len=300; e=0.00E+00)			5.393	0.6332	0.006702	36	16	0	0	46	21	0	2	52	23	0	0	0.989428	0.899526	0.987397	0.943348	0.942436	0.960257	1.09994	1.35495e+07	1.2313e+07	1.35227e+07	1.29101e+07	1.29086e+07	1.31486e+07	0.762396	0.0779763	3
PMI_008127		XP_022104870.1 sialidase-1-like isoform X1 [Acanthaster planci] (id=76.49%; len=370; e=0.00E+00)			3.801	0.6046	0.037961	6	5	1	4	11	6	1	5	11	6	1	5	0.898782	0.925999	0.910276	0.875971	0.965664	0.985725	1.12529	1.75756e+06	1.81021e+06	1.78091e+06	1.71312e+06	1.88754e+06	1.92767e+06	0.762381	0.0779861	3
m.49837	74621	sp|P18700.1|TBB_STRPU RecName: Full=Tubulin beta chain; AltName: Full=Beta-tubulin (id=97.34%; len=188; e=9.27E-134)			5.39	0.6452	0.003897	56	13	0	0	88	14	0	0	93	17	0	6	0.962438	0.929926	0.980989	0.975066	0.965158	0.973061	1.05491	3.03692e+07	2.92467e+07	3.09894e+07	3.07565e+07	3.0402e+07	3.07012e+07	0.76238	0.0779865	3
PMI_015321		XP_022107637.1 protein FAM162A-like [Acanthaster planci] (id=58.74%; len=206; e=9.35E-63)			3.677	0.5619	0.07183	6	5	2	3	3	3	1	2	3	3	1	2	0.933256	0.965136	0.9466	0.803812	0.858626	0.978677	1.21754	634019	659622	649143	556137	597444	671168	0.76236	0.077999	3
m.25059,m.33740,m.33738,PMI_002817	Pmi_649140_O,50477,50475,None	OXND1_DANRE_Oxidoreductase_NAD-binding_domain-containing_..CUT,XP_022102359.1 oxidoreductase NAD-binding domain-containing protein 1-like isoform X1 [Acanthaster planci] (id=78.81%; len=302; e=1.21E-180) ,XP_022102360.1 oxidoreductase NAD-binding domain-containing protein 1-like isoform X2 [Acanthaster planci] (id=78.11%; len=297; e=2.88E-176) ,XP_022102359.1 oxidoreductase NAD-binding domain-con…	1633	3	3.277	0.437	0.505121					1	1	0	0	3	2	0	0	0.775558	0.805896	1	0.916179	0.766715	0.864396	1.30426	93817.5	98735.5	127153	114266	93744.4	105790	0.762211	0.0780925	2
m.52433,m.52418	78159,78152	XP_022107686.1 plasminogen activator inhibitor 1 RNA-binding protein-like isoform X1 [Acanthaster planci] (id=77.90%; len=181; e=4.14E-80) ,XP_022107686.1 plasminogen activator inhibitor 1 RNA-binding protein-like isoform X1 [Acanthaster planci] (id=77.90%; len=181; e=5.49E-80)	2574	13	6.483	0.6482	0.009731	33	11	0	3	46	12	0	2	43	13	0	3	0.864472	0.9105	0.878469	0.91461	0.984541	0.993718	1.14951	1.67409e+07	1.76277e+07	1.69847e+07	1.77121e+07	1.90604e+07	1.92422e+07	0.762066	0.0781841	3
m.50915	76298	XP_022087390.1 uncharacterized protein LOC110977496 isoform X3 [Acanthaster planci] (id=45.51%; len=167; e=3.99E-43)			5.14	0.5656	0.015946					5	3	1	0	5	3	1	0	0.9393	0.662468	0.83995	0.983298	0.748926	0.687513	1.48429	568701	400681	510182	596751	454754	415770	0.762007	0.0782212	2
m.21231	Pmi_633570_T	TIM44_MOUSE_Mitochondrial_import_inner_membrane_transloc..CUT			3.237	0.4087	0.202079	5	4	1	3	3	3	0	0	4	4	0	3	0.865608	0.941281	0.963609	0.967108	0.894242	0.992872	1.14702	317799	345814	353841	354870	327894	364889	0.761792	0.0783563	3
PMI_008117		XP_022101207.1 nischarin-like isoform X3 [Acanthaster planci] (id=77.62%; len=983; e=0.00E+00)			5.477	0.5775	0.217012	5	5	1	4	4	3	1	1	4	4	1	1	0.913577	0.895533	0.876439	0.868025	0.990261	0.898803	1.14082	347415	340657	333419	330274	376681	341898	0.761749	0.0783831	3
m.31204	46681	XP_022096293.1 eIF-2-alpha kinase activator GCN1-like [Acanthaster planci] (id=79.67%; len=674; e=0.00E+00)			4.296	0.5757	0.101574	9	9	0	0	11	9	0	0	12	11	0	0	0.817006	0.955607	0.910661	0.920709	0.874085	0.985606	1.20636	1.56256e+06	1.82581e+06	1.74295e+06	1.76172e+06	1.66984e+06	1.88755e+06	0.76152	0.0785276	3
m.35195	53064	XP_022079921.1 peroxisomal bifunctional enzyme-like [Acanthaster planci] (id=77.22%; len=711; e=0.00E+00)			6.132	0.6276	0.003873	19	16	0	16	35	27	0	24	26	20	0	18	0.952193	0.944233	0.963208	0.994691	0.946941	0.980942	1.05344	4.44046e+06	4.41058e+06	4.49714e+06	4.64077e+06	4.41679e+06	4.57754e+06	0.760962	0.0788795	3
PMI_006764		XP_022087931.1 tetratricopeptide repeat protein 4-like [Acanthaster planci] (id=63.61%; len=415; e=3.14E-173)			2.177	0.2655	0.137573	2	2	1	1					5	2	1	1	0.750176	0.975428	0.778216	0.761168	0.898318	0.928109	1.30027	2.01548e+06	2.59138e+06	2.09287e+06	2.05429e+06	2.40095e+06	2.4858e+06	0.760862	0.0789429	2
m.53554,m.29983	79745,Pmi_665380_E	XP_022108407.1 uncharacterized protein LOC110988832 [Acanthaster planci] (id=70.35%; len=1666; e=0.00E+00) ,EQST_ACTEQ_Equistatin	1352	91	7.861	0.7853	0.002155	400	77	0	0	654	95	0	0	610	95	0	0	0.91729	0.972885	0.940864	0.934341	0.99526	0.957004	1.085	3.9215e+08	4.16027e+08	4.0218e+08	3.99382e+08	4.25606e+08	4.08964e+08	0.760774	0.0789985	3
m.19117,PMI_005176	Pmi_623340_K,None	KAPCA_CRIGR_cAMP-dependent_protein_kinase_catalytic_subun..CUT,XP_022087734.1 cAMP-dependent protein kinase catalytic subunit alpha-like isoform X5 [Acanthaster planci] (id=94.80%; len=346; e=0.00E+00)	1268	13	4.395	0.6473	0.001296	9	8	0	0	15	11	0	0	13	11	0	0	0.938695	0.92146	0.914725	0.98027	0.898408	0.969596	1.09112	3.61883e+06	3.53982e+06	3.51733e+06	3.7888e+06	3.4478e+06	3.73522e+06	0.760707	0.0790405	3
m.15101,PMI_015780	Pmi_599470_C,None	CTND2_HUMAN_Catenin_delta-2,XP_022094304.1 catenin delta-2-like isoform X4 [Acanthaster planci] (id=78.79%; len=580; e=0.00E+00)	1129	4	2.79	0.3111	0.10492	3	3	0	2	2	1	0	0	2	2	0	2	0.964944	0.970736	0.92612	0.921508	0.931368	0.948752	1.05342	1.43375e+06	1.44755e+06	1.36937e+06	1.37658e+06	1.37613e+06	1.40661e+06	0.760707	0.0790408	3
PMI_007340		XP_022091010.1 uncharacterized protein LOC110979487 isoform X2 [Acanthaster planci] (id=76.90%; len=381; e=0.00E+00)			3.256	0.4094	0.131341	4	4	2	2	1	1	1	0	1	1	1	0	0.695343	1	0.79178	0.726195	0.85452	0.879145	1.43814	93352.8	135917	107516	98158.3	115615	118996	0.760491	0.0791771	3
m.23121	Pmi_641660_U	UFL1_MACFA_E3_UFM1-protein_ligase_1			3.727	0.5273	0.087826	5	5	2	3	9	6	1	5	9	7	2	5	0.920507	0.958658	0.955939	0.902501	0.940764	0.94768	1.06222	622356	650207	649174	612052	636670	638346	0.760435	0.0792128	3
m.18956,m.19988	25072,Pmi_627570_n	XP_022091791.1 uncharacterized protein LOC110979920 isoform X2 [Acanthaster planci] (id=63.93%; len=427; e=1.68E-178) ,no_annot	1428	10	3.858	0.5251	0.060807	5	4	0	3	9	8	0	8	6	4	0	2	0.961996	0.888765	0.735237	0.659524	0.699786	0.647392	1.48595	1.14191e+06	1.0454e+06	869155	776539	822790	758612	0.760346	0.079269	3
m.20521	Pmi_630181_H	HMMR_HUMAN_Hyaluronan_mediated_motility_receptor			3.49	0.4373	0.032006	4	4	0	3	7	7	0	7	4	4	0	3	0.797811	0.968753	0.855212	0.823999	0.861593	0.949628	1.21426	187254	227470	200132	194018	201733	220560	0.76029	0.079304	3
m.31381,PMI_023373,m.24763	46957,None,Pmi_648005_P	XP_022108279.1 peptidyl-prolyl cis-trans isomerase NIMA-interacting 4-like [Acanthaster planci] (id=95.83%; len=96; e=6.53E-63) ,XP_022108279.1 peptidyl-prolyl cis-trans isomerase NIMA-interacting 4-like [Acanthaster planci] (id=95.83%; len=96; e=2.58E-62) ,PIN4_DANRE_Peptidyl-prolyl_cis-trans_isomerase_NIMA-intera..CUT	565	5	4.511	0.6526	0.039544	6	3	0	0	6	4	0	0	5	4	0	0	0.768396	0.828082	0.868821	0.933753	0.946432	0.905644	1.2317	295485	318323	333591	357753	363336	347938	0.760151	0.0793924	3
PMI_016472		XP_022109940.1 uncharacterized protein LOC110989686 [Acanthaster planci] (id=75.40%; len=252; e=2.09E-130)			4.55	0.5834	0.058301	9	6	3	3	11	7	2	1	12	9	3	1	0.969296	0.945982	0.957208	0.942443	0.955902	0.916492	1.05762	1.6468e+06	1.60556e+06	1.6269e+06	1.59918e+06	1.61879e+06	1.55751e+06	0.760075	0.0794404	3
PMI_000198		XP_022102027.1 neutral cholesterol ester hydrolase 1-like [Acanthaster planci] (id=75.28%; len=267; e=6.86E-145)			4.908	0.7113	0.036212	6	5	1	3	10	8	1	6	8	6	1	4	0.960242	0.942986	0.949684	0.921573	0.956205	0.961929	1.04379	626071	616414	617859	595748	622990	627852	0.760014	0.0794788	3
PMI_019054		XP_022110702.1 kielin/chordin-like protein, partial [Acanthaster planci] (id=63.84%; len=495; e=0.00E+00)			4.5	0.5893	0.002147	22	14	3	9	34	18	5	5	27	17	5	10	0.876353	0.999516	0.89081	0.905933	0.981277	0.96218	1.14054	2.92073e+06	3.33731e+06	2.97441e+06	3.02623e+06	3.27527e+06	3.21177e+06	0.759975	0.0795039	3
m.23098	Pmi_641483_K	KIFA3_STRPU_Kinesin-associated_protein_3			3.982	0.4919	0.258515	4	4	0	4	3	3	0	1	6	5	0	4	0.786711	0.947882	0.924198	0.908252	0.912872	0.937846	1.20487	100622	121424	118308	116141	116807	120069	0.759762	0.0796392	3
m.27870	Pmi_658662_R	RDHE2_MOUSE_Epidermal_retinol_dehydrogenase_2			2.959	0.4262	0.242647					2	2	1	1	1	1	0	0	0.930946	0.769324	0.9106	0.931832	0.430433	0.999227	2.32145	18656.8	15987.6	18655.8	19079.3	8346.58	20202.7	0.759596	0.0797442	2
m.15112	Pmi_599640_A	ARFP1_HUMAN_Arfaptin-1			5.239	0.6432	0.017931	14	8	1	7	17	12	1	11	15	10	1	9	0.95143	0.947679	0.956849	0.970985	0.982022	0.968504	1.03624	2.93575e+06	2.91977e+06	2.95563e+06	2.99121e+06	3.02624e+06	2.98698e+06	0.759186	0.0800047	3
PMI_020603		EPB79172.1 core histone H2A/H2B/H3/H4 [Ancylostoma ceylanicum] (id=100.00%; len=103; e=3.99E-66)			4.882	0.6003	0.00819	24	10	0	9	44	11	0	9	49	12	0	10	0.914844	0.915154	0.893684	0.875558	0.955213	0.925647	1.09098	2.02302e+07	2.00472e+07	1.9684e+07	1.92969e+07	2.08818e+07	2.03084e+07	0.7591	0.0800591	3
PMI_023367		XP_022096369.1 bromodomain adjacent to zinc finger domain protein 1A-like [Acanthaster planci] (id=69.57%; len=539; e=0.00E+00)			3.624	0.5574	0.026908	7	7	0	1	8	6	1	1	15	14	1	3	0.898803	0.886544	0.918909	0.937171	0.921384	0.962976	1.08621	859616	848420	878294	896018	881718	922607	0.758923	0.0801715	3
PMI_007662		XP_022097266.1 translin-associated protein X-like [Acanthaster planci] (id=73.53%; len=306; e=5.89E-161)			3.944	0.5235	0.04162	7	6	0	6	8	7	1	6	7	4	0	4	0.94145	0.905214	0.904111	0.992272	0.874055	0.892812	1.13525	912213	873456	876473	967676	844187	863882	0.7589	0.0801864	3
m.10542	Pmi_561240_W	WASL_BOVIN_Neural_Wiskott-Aldrich_syndrome_protein			3.707	0.5081	0.016637	18	8	5	3	12	6	3	3	9	7	4	2	0.952329	0.939634	0.955264	0.91085	0.886411	0.939956	1.07768	392341	384307	391738	373436	363459	386581	0.758657	0.0803411	3
PMI_010916		XP_022098449.1 ubiquitin-like modifier-activating enzyme ATG7 [Acanthaster planci] (id=71.60%; len=595; e=0.00E+00)			3.855	0.4365	0.037893	6	6	0	3	8	7	0	4	9	8	0	5	0.94921	0.966188	0.895008	0.922954	0.957539	0.942293	1.07953	1.05179e+06	1.06889e+06	991792	1.02302e+06	1.05976e+06	1.04262e+06	0.757826	0.0808708	3
PMI_019719		XP_022099605.1 eukaryotic translation initiation factor 5B-like [Acanthaster planci] (id=70.70%; len=372; e=1.69E-89)			5.12	0.6256	0.012514	13	7	0	3	13	9	0	5	10	10	0	3	0.853836	0.93373	0.932094	0.902651	0.9916	0.987408	1.16135	1.02232e+06	1.11837e+06	1.1171e+06	1.08163e+06	1.18683e+06	1.1836e+06	0.757676	0.0809666	3
PMI_011354,PMI_003131,m.45249	None,None,67819	XP_022097379.1 homer protein homolog 2-like isoform X1 [Acanthaster planci] (id=89.30%; len=271; e=7.52E-173) ,XP_022097380.1 homer protein homolog 2-like isoform X2 [Acanthaster planci] (id=81.59%; len=364; e=0.00E+00) ,XP_022097380.1 homer protein homolog 2-like isoform X2 [Acanthaster planci] (id=87.43%; len=366; e=0.00E+00)	1820	8	4.663	0.5237	0.033976	3	3	0	0	3	3	0	0	7	6	0	0	0.80569	0.944062	0.926233	0.893579	0.938467	0.991154	1.23019	288945	337794	332987	320835	336690	355199	0.757666	0.0809731	3
PMI_025922		XP_022096202.1 ATP synthase subunit alpha, mitochondrial-like [Acanthaster planci] (id=95.04%; len=464; e=0.00E+00)			5.732	0.6912	0.003656	98	33	1	0	162	35	0	0	139	37	0	0	0.978162	0.977416	0.941575	0.964998	1	0.950364	1.06205	6.79901e+07	6.79284e+07	6.54611e+07	6.70934e+07	6.95082e+07	6.5959e+07	0.757601	0.0810146	3
m.8229,m.44855,m.44853,m.44854	Pmi_532970_B,67159,67153,67158	BSDC1_MOUSE_BSD_domain-containing_protein_1,XP_022097067.1 BSD domain-containing protein 1-like [Acanthaster planci] (id=77.86%; len=289; e=3.68E-153) ,XP_022097067.1 BSD domain-containing protein 1-like [Acanthaster planci] (id=78.40%; len=287; e=1.09E-153) ,XP_022097067.1 BSD domain-containing protein 1-like [Acanthaster planci] (id=65.04%; len=492; e=0.00E+00)	2396	4	3.338	0.5024	0.417955	3	3	0	0					3	2	0	0	0.869995	0.811572	0.662161	1	0.915401	0.768201	1.51021	61799.6	57489.6	48443	70867.6	64296.1	54349.6	0.757151	0.0813025	2
PMI_018416		XP_022089479.1 probable thiopurine S-methyltransferase isoform X2 [Acanthaster planci] (id=45.61%; len=228; e=2.36E-55)			4.416	0.5324	0.198924					5	3	0	2	5	3	0	2	0.874718	0.986942	0.939648	0.88083	0.884785	1	1.14323	560102	632241	601368	564204	566828	640522	0.757092	0.0813399	2
m.12400,m.9786	17813,Pmi_552171_H	XP_022097453.1 heterogeneous nuclear ribonucleoprotein M-like [Acanthaster planci] (id=82.64%; len=144; e=1.22E-64) ,HNRPM_MOUSE_Heterogeneous_nuclear_ribonucleoprotein_M	1485	5	3.328	0.4975	0.146172	1	1	0	0	5	5	0	1	4	4	0	1	0.879594	0.974097	0.960579	0.740133	0.949128	0.948027	1.31611	198281	219572	216548	166674	213412	213857	0.756953	0.0814294	3
m.27781	Pmi_658332_Y	YL446_MIMIV_Uncharacterized_protein_L446			5.124	0.5608	0.010981					8	4	0	4	5	3	0	3	0.897194	0.62718	0.934727	0.970662	0.692609	0.726686	1.54766	2.09995e+06	1.4784e+06	2.20161e+06	2.28566e+06	1.62636e+06	1.70949e+06	0.756861	0.081488	2
PMI_004354		XP_022105848.1 focadhesin-like [Acanthaster planci] (id=79.65%; len=231; e=6.19E-118)			3.85	0.4896	0.566583	1	1	1	0	1	1	1	0	1	1	1	0	0.754312	0.793162	0.685586	0.796652	1	0.815953	1.45861	20483.6	21523.4	18614.7	21637.1	27146.3	22118.7	0.756697	0.0815935	3
PMI_026602		XP_022105206.1 probable beta-D-xylosidase 2 isoform X2 [Acanthaster planci] (id=83.81%; len=525; e=0.00E+00)			5.099	0.6417	0.003876	20	11	1	5	27	16	2	6	30	15	3	5	0.984853	0.928462	0.968854	0.92743	0.943369	0.929696	1.06192	3.36509e+06	3.16224e+06	3.29524e+06	3.15994e+06	3.21205e+06	3.167e+06	0.756486	0.0817287	3
m.21544	Pmi_634913_2	2ABD_DANRE_Serine/threonine-protein_phosphatase_2A_55_kDa_..CUT			5.311	0.582	0.001211	20	14	14	0	21	15	15	0	27	17	17	0	0.830838	0.927836	0.927372	0.849717	0.976947	0.973307	1.17586	3.00009e+06	3.34964e+06	3.34512e+06	3.06914e+06	3.52983e+06	3.51419e+06	0.756314	0.0818392	3
m.39987	60496	XP_022107276.1 chromatin modification-related protein eaf-1-like [Acanthaster planci] (id=68.00%; len=903; e=0.00E+00)			4.878	0.5748	0.274429	4	4	0	4	2	2	0	1	1	1	0	0	0.828657	0.770441	0.653251	0.667192	0.901793	0.985208	1.50816	27662.9	25676.2	21664.7	22029.8	30476.8	33095.9	0.756207	0.0819079	3
PMI_006515		XP_022090291.1 lipoma-preferred partner homolog isoform X1 [Acanthaster planci] (id=76.62%; len=154; e=3.19E-60)			3.798	0.6222	0.004015	9	6	1	0					9	6	0	5	0.845956	0.865913	0.775613	0.897802	0.976487	0.964558	1.25899	3.77256e+06	3.86803e+06	3.45531e+06	4.01883e+06	4.36112e+06	4.32126e+06	0.756136	0.0819535	2
m.20820	Pmi_631660_N	NAGAB_CHICK_Alpha-N-acetylgalactosaminidase			4.995	0.6719	0.135929	4	4	0	0	11	8	0	5	9	7	0	5	0.889698	0.925483	0.875209	0.87122	0.953307	0.921391	1.09422	684704	715385	675821	670676	739735	712115	0.755795	0.0821725	3
PMI_011732		XP_022080384.1 alpha-L-fucosidase-like isoform X1 [Acanthaster planci] (id=83.81%; len=451; e=0.00E+00)			4.106	0.5204	0.09005	6	6	0	6	9	8	1	7	11	9	1	8	0.870342	0.902789	0.881387	0.916157	0.925516	0.963193	1.10668	641611	665288	649954	683228	682059	712110	0.755771	0.0821876	3
PMI_013189		XP_022107899.1 cubilin-like isoform X2 [Acanthaster planci] (id=66.40%; len=1601; e=0.00E+00)			4.655	0.715	0.006654					7	5	0	3	7	5	0	3	0.934013	0.790283	0.914641	0.993529	0.854545	0.733146	1.35516	391230	332082	384934	417731	358275	308612	0.755582	0.0823093	2
PMI_010731		XP_022086812.1 apoptosis-inducing factor 1, mitochondrial-like [Acanthaster planci] (id=84.23%; len=444; e=0.00E+00)			5.385	0.6684	0.026891	34	21	1	17	41	26	2	21	43	23	2	18	0.89768	0.871035	0.986011	0.977396	0.953411	0.944358	1.132	6.54482e+06	6.33601e+06	7.17469e+06	7.11337e+06	6.93967e+06	6.87148e+06	0.755457	0.0823902	3
m.26868	Pmi_655620_G	GRAP1_MOUSE_GRIP1-associated_protein_1			3.887	0.442	0.127712	7	5	1	4	2	1	0	0	3	2	0	2	0.807444	0.900599	0.890903	0.914186	0.979002	1	1.23848	64280	71278.9	70838.2	72765.9	77492.8	79128.2	0.755201	0.0825547	3
m.22354	31092	XP_022109902.1 mechanosensory protein 2-like isoform X2 [Acanthaster planci] (id=87.82%; len=271; e=1.23E-158)			4.672	0.6514	0.014237	27	10	0	9	34	10	0	6	29	12	0	8	0.998487	0.85213	0.956836	0.958282	0.873986	0.880529	1.17176	4.58081e+06	3.89135e+06	4.38774e+06	4.39987e+06	3.99579e+06	4.03063e+06	0.755166	0.0825773	3
m.53728	80049	XP_022082330.1 28S ribosomal protein S17, mitochondrial-like [Acanthaster planci] (id=64.22%; len=109; e=6.12E-39)			3.802	0.4892	0.369455	2	2	1	0					1	1	1	0	0.70465	0.874911	0.700901	0.891116	0.986701	0.918455	1.40776	160486	196378	158002	201127	219228	204693	0.754775	0.0828299	2
PMI_012909		XP_022080635.1 galactocerebrosidase-like isoform X1 [Acanthaster planci] (id=78.52%; len=661; e=0.00E+00)			4.134	0.5428	0.138728					15	12	0	10	14	11	0	0	0.997363	0.899521	0.960909	0.973976	0.980718	0.933911	1.10877	2.998e+06	2.70296e+06	2.88835e+06	2.92685e+06	2.94793e+06	2.80722e+06	0.75473	0.0828589	2
PMI_013573		XP_022092468.1 BTB/POZ domain-containing protein 17-like [Acanthaster planci] (id=74.90%; len=510; e=0.00E+00)			4.041	0.5588	0.072291	5	4	1	3	9	8	1	0	8	6	1	0	0.906496	0.963467	0.927868	0.898842	0.936803	0.997995	1.11031	707758	752401	724429	701420	731439	779259	0.75439	0.0830786	3
PMI_007859		XP_022109279.1 prohibitin-2-like [Acanthaster planci] (id=91.49%; len=94; e=2.93E-52)			3.801	0.5228	0.078633	9	4	1	0	10	4	1	0	9	5	2	0	0.982131	0.825829	0.938138	0.966536	0.832102	0.901857	1.18927	5.36025e+06	4.48804e+06	5.0962e+06	5.27075e+06	4.53865e+06	4.90024e+06	0.754368	0.0830924	3
m.9442	Pmi_548041_D	DJB11_HUMAN_DnaJ_homolog_subfamily_B_member_11			3.354	0.4917	0.233835	2	2	0	0	3	3	1	0	6	5	1	4	0.925437	0.93405	0.836643	0.947371	0.868022	0.947128	1.13235	565030	569585	509567	577479	527440	577502	0.754205	0.0831976	3
m.21064	Pmi_632770_C	CUL4B_MOUSE_Cullin-4B			4.016	0.4861	0.016816	9	7	1	6	4	4	1	3	4	4	1	3	0.905393	0.897413	0.931154	0.924066	0.960934	0.997205	1.1112	397863	391658	408363	405362	422349	438040	0.754128	0.0832474	3
m.23896,PMI_029837	Pmi_644453_C,None	COPZ1_BOVIN_Coatomer_subunit_zeta-1,XP_022107949.1 U6 snRNA-associated Sm-like protein LSm3 isoform X2 [Acanthaster planci] (id=65.98%; len=97; e=2.68E-31)	1917	2	3.513	0.6157	0.032779	4	2	0	0	3	2	0	0	4	2	0	0	0.833579	1	0.892992	0.831863	0.818472	0.881112	1.22179	507996	609301	543069	505766	497628	536481	0.753848	0.083429	3
m.24578	Pmi_646731_n	no_annot			5.126	0.6015	0.043799	4	3	1	0	4	3	2	0	3	2	1	0	0.964281	0.979391	0.835963	0.730244	0.789743	0.850326	1.34118	253010	257952	218940	192908	207854	224381	0.75384	0.0834344	3
m.32357	Pmi_1875510_	no_annot			4.01	0.4835	0.217012					2	2	1	0	4	3	1	0	0.939482	0.830179	0.810666	0.751753	1	0.887846	1.33022	240033	211822	207181	192044	255494	227201	0.75382	0.0834473	2
PMI_019581		XP_022107019.1 optic atrophy 3 protein homolog [Acanthaster planci] (id=85.44%; len=158; e=1.03E-95)			2.605	0.4127	0.543115	2	2	1	1	1	1	0	0	2	2	0	0	0.937063	0.820314	0.949681	0.93269	0.893326	0.866503	1.1577	172350	148605	175668	171773	163030	156208	0.753752	0.0834909	3
m.14908	Pmi_598150_H	HPGDS_CHICK_Hematopoietic_prostaglandin_D_synthase			4.853	0.5699	0.009321	14	9	1	8	17	12	3	8	22	13	3	9	0.942193	0.901802	0.901993	0.923898	0.936453	0.948773	1.05209	5.63776e+06	5.35715e+06	5.37652e+06	5.51044e+06	5.571e+06	5.64487e+06	0.753723	0.08351	3
PMI_028913		XP_022109983.1 heterogeneous nuclear ribonucleoprotein A0-like isoform X2 [Acanthaster planci] (id=50.46%; len=327; e=1.13E-48)			4.337	0.6661	0.012809	11	6	0	4	27	6	0	5	25	8	0	5	0.954309	0.974711	0.959224	0.90434	0.925336	0.976745	1.08006	1.2563e+07	1.2828e+07	1.26231e+07	1.19018e+07	1.21769e+07	1.28475e+07	0.753574	0.0836064	3
PMI_000812		XP_022108841.1 protein HIRA-like [Acanthaster planci] (id=77.75%; len=1092; e=0.00E+00)			3.642	0.4543	0.196644	1	1	1	0	1	1	1	0	4	4	1	3	0.860689	0.890273	0.856881	0.850411	0.941491	1	1.1759	60644.8	62552.2	60494.9	59700.8	66262.3	70445.3	0.7534	0.0837194	3
m.26162	38055	XP_022093394.1 lectin L6-like [Acanthaster planci] (id=59.27%; len=275; e=2.49E-113)			5.571	0.6418	0.002513	52	14	1	0	73	16	1	0	72	15	1	0	0.938937	1	0.901991	0.849526	0.905876	0.90368	1.17713	2.97286e+07	3.16858e+07	2.85657e+07	2.69123e+07	2.86848e+07	2.86297e+07	0.753318	0.0837722	3
PMI_016756,m.30484	None,Pmi_666613_R	XP_022089400.1 ribosome biogenesis regulatory protein homolog [Acanthaster planci] (id=76.84%; len=285; e=1.23E-140) ,RRS1_BOVIN_Ribosome_biogenesis_regulatory_protein_homolog	1011	6	4.166	0.5867	0.133275	4	4	0	0	1	1	0	0	3	3	0	3	0.852749	0.850018	0.84253	0.905249	0.962635	0.885749	1.14255	371239	359215	364809	396395	426597	379194	0.753252	0.0838153	3
m.29030	Pmi_662270_C	CTL1_XENLA_Choline_transporter-like_protein_1			4.568	0.5539	0.027909	4	4	2	2	8	3	1	2	6	3	0	0	0.842544	0.90733	0.907415	0.989818	0.8999	0.987949	1.1748	327465	351849	353671	386232	350301	384622	0.753121	0.0839001	3
PMI_016090		XP_022109965.1 sulfide:quinone oxidoreductase, mitochondrial-like [Acanthaster planci] (id=80.00%; len=465; e=0.00E+00)			5.34	0.6653	0.038456	18	12	0	12	28	17	0	14					0.921759	0.985459	0.96427	0.996501	0.942283	0.981863	1.08109	6.66255e+06	7.11605e+06	6.97386e+06	7.20306e+06	6.81151e+06	7.08771e+06	0.752985	0.0839887	2
PMI_022061		XP_022105356.1 ras-related protein Rab-7a [Acanthaster planci] (id=97.56%; len=205; e=1.91E-145)			5.406	0.7092	0.005755	46	17	17	0	57	20	20	0	58	21	21	0	0.978973	0.980959	0.939276	0.935778	0.908607	0.967766	1.07963	2.12493e+07	2.12764e+07	2.03685e+07	2.02968e+07	1.9709e+07	2.09789e+07	0.752752	0.0841402	3
PMI_017195		XP_022100287.1 dnaJ homolog subfamily A member 3, mitochondrial-like isoform X1 [Acanthaster planci] (id=84.60%; len=461; e=0.00E+00)			4.288	0.5685	0.077795	3	3	1	1	6	5	1	4	5	4	1	3	0.862869	0.951967	0.955344	0.892464	0.905568	0.933024	1.10717	563602	623291	628062	582332	588735	607142	0.752556	0.0842676	3
m.20433	Pmi_629820_A	ALDH2_HUMAN_Aldehyde_dehydrogenase,_mitochondrial			5.467	0.6432	0.034898	34	22	3	16	56	27	3	21	53	27	4	20	0.925149	0.974438	0.95711	0.927845	0.979934	0.984775	1.06445	9.26005e+06	9.76775e+06	9.58008e+06	9.28754e+06	9.8057e+06	9.8617e+06	0.752481	0.084316	3
m.26059,m.18697	37853,Pmi_621210_S	XP_022085400.1 syntaxin-binding protein 1-like [Acanthaster planci] (id=94.18%; len=550; e=0.00E+00) ,STXB1_RAT_Syntaxin-binding_protein_1	1109	20	4.678	0.6437	0.062494	17	13	0	12	15	13	0	13	22	18	0	16	0.938115	0.953467	0.942421	0.956189	0.952893	0.96225	1.02573	1.76182e+06	1.7904e+06	1.7694e+06	1.79654e+06	1.78834e+06	1.80661e+06	0.75238	0.0843819	3
m.28529	Pmi_660540_D	DDX3L_MOUSE_Putative_ATP-dependent_RNA_helicase_Pl10			5.592	0.6449	0.008278	79	34	4	27	116	42	4	30	111	45	4	33	0.915027	0.993677	0.927197	0.912972	0.961213	0.992168	1.0884	2.29379e+07	2.49083e+07	2.32486e+07	2.28948e+07	2.40932e+07	2.48745e+07	0.752188	0.0845067	3
m.29867	Pmi_665101_U	UBE3A_HUMAN_Ubiquitin-protein_ligase_E3A			2.376	0.1808	1.04364					1	1	1	0	1	1	1	0	0.473146	0.951624	0.494354	0.359115	0.769379	0.882479	2.64992	222623	469440	227359	175184	361526	422037	0.751981	0.0846417	2
m.57197	85542	XP_022103559.1 dolichyl-diphosphooligosaccharide--protein glycosyltransferase subunit STT3A [Acanthaster planci] (id=97.47%; len=711; e=0.00E+00)			6.343	0.6376	0.004045	16	14	0	12	27	16	0	13	27	16	0	13	0.929622	0.891686	0.878779	1	0.986023	0.942561	1.13794	2.87415e+06	2.75059e+06	2.70539e+06	3.08717e+06	3.04694e+06	2.90851e+06	0.751446	0.0849912	3
m.17054,PMI_028212	22398,None	XP_022104247.1 F-box only protein 6-like [Acanthaster planci] (id=72.33%; len=206; e=1.12E-105) ,XP_022104247.1 F-box only protein 6-like [Acanthaster planci] (id=63.33%; len=180; e=2.91E-70)	69	5	3.297	0.5105	0.130481	4	3	0	1					5	3	0	0	0.889619	0.758097	0.828407	1	0.722481	0.860602	1.38412	482456	410819	448433	542548	391070	465821	0.751289	0.0850937	2
PMI_010513		XP_022085278.1 nuclear pore complex protein Nup214-like [Acanthaster planci] (id=60.36%; len=787; e=0.00E+00)			3.909	0.5111	0.02301	8	8	2	6	7	7	1	2	10	9	2	7	0.893962	0.874874	0.923331	0.976972	0.923011	0.973817	1.1167	367334	359653	379859	401480	379270	400134	0.751165	0.0851744	3
PMI_010876,m.15370	None,Pmi_601460_T	XP_022092860.1 transcription elongation factor A protein 1-like isoform X1 [Acanthaster planci] (id=86.05%; len=258; e=1.41E-146) ,TCEA1_BOVIN_Transcription_elongation_factor_A_protein_1	543	10	3.658	0.4424	0.018002	6	5	0	2	3	3	0	2	7	7	0	4	0.883634	0.949402	0.880068	0.882815	0.920203	0.963576	1.09489	321791	346223	319512	319802	332759	350284	0.75109	0.0852237	3
PMI_024582,PMI_010790,m.24877	None,None,Pmi_648520_P	XP_022087250.1 cAMP-specific 3',5'-cyclic phosphodiesterase 4C-like isoform X6 [Acanthaster planci] (id=78.88%; len=554; e=0.00E+00) ,XP_022087250.1 cAMP-specific 3',5'-cyclic phosphodiesterase 4C-like isoform X6 [Acanthaster planci] (id=85.74%; len=554; e=0.00E+00) ,PDE4D_MOUSE_cAMP-specific_3p,5p-cyclic_phosphodiesterase_4D	1222	3	4.063	0.5745	0.652678	1	1	0	0	1	1	0	0	1	1	0	0	0.834148	0.853931	0.845773	0.935386	0.8882	0.842639	1.12137	74981.2	76911.2	77778.6	85139	80135.7	76449.9	0.750745	0.0854493	3
PMI_028740,m.10910	None,Pmi_565500_U	XP_022109365.1 ubiquitin-fold modifier-conjugating enzyme 1 [Acanthaster planci] (id=94.74%; len=171; e=1.45E-118) ,UFC1_AEDAE_Ubiquitin-fold_modifier-conjugating_enzyme_1	2500	4	3.87	0.4088	0.506083	1	1	0	0	3	3	0	2	3	3	0	3	0.927516	0.914202	0.913431	0.896172	0.935953	0.964577	1.07633	410247	401452	401579	395276	410922	424293	0.75049	0.0856164	3
m.52090	77665	XP_022097947.1 neuroblast differentiation-associated protein AHNAK-like [Acanthaster planci] (id=71.37%; len=248; e=1.64E-62)			5.255	0.6774	0.001049	49	15	0	0	49	16	0	0	54	18	0	0	0.94557	0.937064	0.880656	0.878456	0.948516	1	1.13836	2.84002e+07	2.81004e+07	2.63984e+07	2.63186e+07	2.84165e+07	2.99933e+07	0.750411	0.0856678	3
m.10971,m.15709	Pmi_566150_R,21074	RO21_XENLA_Heterogeneous_nuclear_ribonucleoprotein_A2_homolog_1,XP_022084584.1 heterogeneous nuclear ribonucleoprotein A1-like 2, partial [Acanthaster planci] (id=92.83%; len=223; e=1.56E-143)	2061	8	2.96	0.4916	0.05712	2	2	0	0	6	5	0	0	5	5	0	0	0.817709	0.924079	0.876077	0.924069	0.934327	0.997811	1.22025	221126	250733	237234	249671	252354	270193	0.750323	0.0857257	3
PMI_007674		XP_022091557.1 histidine--tRNA ligase, cytoplasmic-like isoform X2 [Acanthaster planci] (id=79.92%; len=508; e=0.00E+00)			4.688	0.5972	0.003691	21	16	0	0	23	14	0	11	27	18	0	0	0.934167	0.974946	0.985192	0.965684	0.957891	0.968914	1.05462	4.57805e+06	4.77714e+06	4.83465e+06	4.74043e+06	4.69205e+06	4.74762e+06	0.75022	0.0857933	3
m.19778	Pmi_626530_A	AOFA_HORSE_Amine_oxidase_[flavin-containing]_A			3.824	0.5103	0.02803	13	10	0	0	9	8	0	0	8	7	1	6	0.83339	0.980553	0.878743	0.951482	0.933544	0.962158	1.17658	1.18442e+06	1.39354e+06	1.2473e+06	1.35121e+06	1.32374e+06	1.36587e+06	0.749944	0.085974	3
m.13848,PMI_016277,m.13846,PMI_022332,m.27744	19338,None,19337,None,Pmi_658340_T	XP_022090158.1 coiled-coil domain-containing protein 50-like isoform X3 [Acanthaster planci] (id=75.88%; len=427; e=0.00E+00) ,XP_022090157.1 trichohyalin-like isoform X2 [Acanthaster planci] (id=66.51%; len=418; e=2.04E-167) ,XP_022090157.1 trichohyalin-like isoform X2 [Acanthaster planci] (id=77.32%; len=313; e=4.70E-160) ,XP_022090157.1 trichohyalin-like isoform X2 [Acanthaster planci] (id=69.…	2536	1	2.263	0.2762	0.176428	2	1	0	0	2	1	0	0	2	1	0	0	0.750786	0.432289	0.697188	0.974088	0.467397	0.540352	2.25332	1.03556e+06	605777	964945	1.3892e+06	657057	753649	0.749882	0.0860147	3
m.13857,m.20020	Pmi_590740_R,26883	RM13_MOUSE_39S_ribosomal_protein_L13,_mitochondrial,XP_022107133.1 39S ribosomal protein L13, mitochondrial-like [Acanthaster planci] (id=87.06%; len=170; e=2.28E-111)	1276	4	3.762	0.5566	0.023895	3	3	0	0	4	3	0	0	6	3	0	0	0.839621	0.85781	0.843509	0.847746	0.946306	0.942403	1.12706	397105	405354	397286	400697	445026	445692	0.7496	0.0861999	3
m.17201	Pmi_613130_M	MON2_XENLA_Protein_MON2_homolog			4.254	0.5261	0.05304	1	1	0	0	2	2	1	1	1	1	1	0	0.688869	0.854848	0.880295	0.860575	0.708931	0.807102	1.27789	13740.7	16315.9	16432	15995.7	14300.7	15538.7	0.749572	0.0862184	3
PMI_011930		XP_022097505.1 NADH dehydrogenase [ubiquinone] flavoprotein 2, mitochondrial-like [Acanthaster planci] (id=61.59%; len=151; e=3.32E-52)			5.067	0.6115	0.062147	6	3	1	0	10	4	1	0	7	4	1	0	0.906485	0.982134	0.921915	0.878097	0.951423	0.988691	1.12595	1.27327e+06	1.37813e+06	1.292e+06	1.22954e+06	1.3339e+06	1.38577e+06	0.749424	0.0863158	3
m.15357	20768	XP_022092115.1 phosphoenolpyruvate carboxykinase, cytosolic [GTP]-like [Acanthaster planci] (id=85.63%; len=522; e=0.00E+00)			5.994	0.6944	0.006119	66	27	0	14	100	30	0	0	91	30	0	18	0.976874	0.98329	0.934201	0.934074	0.986348	0.984317	1.05596	4.0241e+07	4.05e+07	3.84855e+07	3.84899e+07	4.06483e+07	4.05386e+07	0.74922	0.0864497	3
PMI_009247		XP_022089869.1 putative glutamate synthase [NADPH] isoform X1 [Acanthaster planci] (id=90.01%; len=2112; e=0.00E+00)			4.898	0.615	0.002286	17	16	0	13	13	12	0	7	13	11	0	7	0.874701	0.998795	0.957331	0.897989	0.931119	0.980355	1.14187	836653	955296	914786	859062	890762	937214	0.749201	0.0864629	3
m.8682	13523	XP_022089363.1 galactokinase-like [Acanthaster planci] (id=83.81%; len=105; e=2.50E-57)			4.09	0.6318	0.107096	8	3	1	2	8	3	1	2	5	3	1	2	0.883117	0.975687	0.909803	0.962712	0.903696	0.997653	1.12969	1.76159e+06	1.94533e+06	1.81428e+06	1.92013e+06	1.80145e+06	1.98858e+06	0.748477	0.0869398	3
PMI_018960		XP_022093394.1 lectin L6-like [Acanthaster planci] (id=58.91%; len=275; e=5.56E-113)			5.571	0.5861	0.002513	46	14	1	0	65	16	1	0	66	15	1	0	0.959726	0.996486	0.923475	0.869556	0.925952	0.9084	1.14597	2.20936e+07	2.29738e+07	2.12751e+07	2.00377e+07	2.13216e+07	2.09256e+07	0.748403	0.0869884	3
m.29588,m.37767,m.37763,m.37776	Pmi_664040_D,57107,57104,57114	DDX42_XENLA_ATP-dependent_RNA_helicase_DDX42,XP_022080128.1 testis-expressed protein 10 homolog [Acanthaster planci] (id=70.34%; len=735; e=0.00E+00) ,XP_022080128.1 testis-expressed protein 10 homolog [Acanthaster planci] (id=70.61%; len=735; e=0.00E+00) ,XP_022080128.1 testis-expressed protein 10 homolog [Acanthaster planci] (id=68.43%; len=434; e=0.00E+00)	1979	3	4.051	0.4688	0.260877	1	1	0	0	1	1	0	0	2	2	0	1	0.737628	0.762758	0.907883	0.967282	0.761191	0.926705	1.31134	30392.2	31535.5	37068.8	39760	30971.1	37490.4	0.748109	0.0871825	3
PMI_008128		XP_022104858.1 sialidase-1-like isoform X2 [Acanthaster planci] (id=76.44%; len=348; e=0.00E+00)			3.248	0.547	0.390904	4	4	0	2	5	4	0	4	7	5	0	5	0.855224	0.890828	0.872488	0.884848	1	0.943566	1.16928	782013	811913	795740	807573	910647	861974	0.748041	0.0872273	3
PMI_007863		XP_022098548.1 fibropellin-1-like [Acanthaster planci] (id=51.77%; len=620; e=0.00E+00)			6.121	0.6891	0.000396	34	15	6	6	48	16	6	5	49	18	8	5	0.902458	1	0.964883	0.91847	0.962032	0.965769	1.10808	1.42285e+07	1.57471e+07	1.52035e+07	1.45095e+07	1.51504e+07	1.5228e+07	0.748015	0.0872443	3
m.17866	Pmi_616670_L	LVN1_LYTVA_Development-specific_protein_LVN1.2			6.125	0.6494	0.072929	18	7	6	0	17	8	8	0	18	10	9	1	0.827208	0.873557	0.851472	0.841949	0.971166	0.97381	1.17722	2.47762e+06	2.61685e+06	2.5542e+06	2.53349e+06	2.90728e+06	2.91875e+06	0.747856	0.0873499	3
PMI_000656,m.8669	None,Pmi_538300_C	XP_022101045.1 coiled-coil-helix-coiled-coil-helix domain-containing protein 5-like isoform X4 [Acanthaster planci] (id=73.21%; len=112; e=1.60E-54) ,CHCH5_HUMAN_Coiled-coil-helix-coiled-coil-helix_domain-cont..CUT	1128	2	3.832	0.5451	0.498376	1	1	0	0	3	2	0	1	2	2	0	1	0.860713	0.76555	0.769882	0.755972	0.900621	1	1.3228	239747	203924	208231	206132	244618	276175	0.747794	0.0873906	3
PMI_010307,PMI_012964		XP_022108859.1 Golgi SNAP receptor complex member 1-like isoform X2 [Acanthaster planci] (id=94.00%; len=250; e=9.32E-170) ,XP_022108859.1 Golgi SNAP receptor complex member 1-like isoform X2 [Acanthaster planci] (id=97.94%; len=243; e=9.54E-175)	2666	8	3.341	0.5573	0.097931	7	5	0	3	4	4	0	2	4	4	0	3	0.804799	0.947233	0.896695	0.920821	0.966534	0.976769	1.21368	274711	323500	306401	315001	329129	333232	0.747608	0.0875137	3
m.29072,PMI_003880	Pmi_662371_N,None	NUP62_HUMAN_Nuclear_pore_glycoprotein_p62,XP_022094272.1 nuclear pore glycoprotein p62-like [Acanthaster planci] (id=60.59%; len=642; e=1.35E-175)	2450	7	6.023	0.6552	0.030134	3	3	0	0	10	9	0	1	6	5	0	0	0.852937	0.905281	0.89432	0.971858	0.918609	0.920768	1.13942	623925	663617	651230	713096	673312	673107	0.747452	0.0876169	3
PMI_004517		XP_022092600.1 protein HID1-like isoform X4 [Acanthaster planci] (id=85.57%; len=298; e=5.77E-161)			5.119	0.5507	0.164943	7	5	1	3	4	4	0	3	9	7	2	4	0.870456	0.861139	0.898654	0.991361	0.845091	0.920431	1.17308	381926	379198	395601	436291	371531	404282	0.74718	0.0877973	3
PMI_006869		XP_022100533.1 telomerase protein component 1-like [Acanthaster planci] (id=68.25%; len=904; e=0.00E+00)			4.433	0.5275	0.135169	3	3	1	2	6	5	2	3	8	7	3	4	0.836853	0.976049	0.897657	0.902934	0.96724	0.979671	1.17066	348766	407401	373298	376758	403642	408507	0.747077	0.0878653	3
m.31768	Pmi_670170_n	no_annot			2.58	0.3407	0.119333	2	2	0	2	1	1	0	0	2	2	0	0	0.794059	0.865733	0.800121	0.976836	0.784101	0.833771	1.2458	93875.3	103216	94647.1	120828	92146.4	99406.6	0.746987	0.087925	3
PMI_007664,PMI_023897,m.23910,m.22532	None,None,33807,Pmi_639154_R	XP_022097272.1 ubiquitin-like protein FUBI [Acanthaster planci] (id=91.73%; len=133; e=1.26E-80) ,XP_022097272.1 ubiquitin-like protein FUBI [Acanthaster planci] (id=84.21%; len=133; e=2.34E-69) ,XP_022097272.1 ubiquitin-like protein FUBI [Acanthaster planci] (id=90.98%; len=133; e=2.39E-80) ,RS30_BOVIN_40S_ribosomal_protein_S30_>gi	1248	7	3.258	0.455	0.030801	7	3	0	0	7	4	0	0	11	7	0	0	0.906737	0.660001	0.928314	0.974892	0.667094	0.706467	1.47711	8.83168e+06	6.38949e+06	9.04025e+06	9.5047e+06	6.38902e+06	6.73976e+06	0.74696	0.0879432	3
m.27762	Pmi_658311_n	no_annot			3.095	0.3877	0.38805	1	1	1	0	1	1	1	0					1	0.755703	0.838824	0.771961	0.627934	0.687827	1.59252	40399.7	30644.8	34177.1	31458.7	25545.6	28120.5	0.746873	0.0880008	2
m.33783,m.15939,m.33782	50560,Pmi_605200_S,50559	XP_022095331.1 agmatinase, mitochondrial-like isoform X2 [Acanthaster planci] (id=88.55%; len=358; e=0.00E+00) ,SPEB_CHICK_Agmatinase,_mitochondrial,XP_022095331.1 agmatinase, mitochondrial-like isoform X2 [Acanthaster planci] (id=88.54%; len=349; e=0.00E+00)	792	9	4.615	0.5999	0.029624	6	4	0	3	10	7	0	7	9	7	0	6	0.880859	0.966682	0.896927	0.869949	0.895201	0.923043	1.11119	851604	936810	862093	838853	861834	890139	0.746842	0.088021	3
m.22766	Pmi_640270_H	HOP2_XENLA_Homologous-pairing_protein_2_homolog			4.026	0.4645	0.050633	2	2	2	0	4	4	3	1	2	2	1	1	0.786503	0.919035	0.91753	0.757612	0.95886	0.938965	1.26563	75431.2	88371.3	87767.2	72707.8	91806.2	90270.4	0.746191	0.0884533	3
PMI_009219		XP_022087404.1 bifunctional 3'-phosphoadenosine 5'-phosphosulfate synthase-like isoform X1 [Acanthaster planci] (id=91.91%; len=581; e=0.00E+00)			4.415	0.5608	0.00826	11	9	0	8	16	11	0	10	19	14	0	13	0.850117	0.898911	0.880751	0.9115	0.948073	1	1.17631	1.32266e+06	1.39831e+06	1.37047e+06	1.41812e+06	1.47496e+06	1.55568e+06	0.746033	0.0885582	3
PMI_007349		XP_022096135.1 uncharacterized protein LOC110982186 [Acanthaster planci] (id=50.66%; len=1447; e=0.00E+00)			5.812	0.6232	0.328458	2	2	0	1	3	3	0	2	4	4	0	3	0.872834	0.831262	0.802237	0.708395	0.893679	0.862119	1.26155	48568.6	46230.7	44424.5	39373.5	49915.5	47679.4	0.745872	0.0886653	3
m.19413	Pmi_624850_n	no_annot			4.413	0.5536	0.120208	6	4	0	4	7	5	0	3	8	5	0	4	0.891875	0.931835	0.890312	0.82466	0.975546	0.900824	1.18297	744919	779165	743732	689490	815902	752845	0.745731	0.0887596	3
m.21596	Pmi_635180_V	VP33B_RAT_Vacuolar_protein_sorting-associated_protein_33B			2.449	0.3279	0.354838	1	1	1	0	2	2	1	0	2	2	1	0	0.719342	0.911454	0.844452	0.801878	0.869868	0.961807	1.33707	90971.1	117010	108028	101728	111016	122614	0.745217	0.0891022	3
m.21218,PMI_003270	Pmi_633460_O,None	ODBA_PANTR_2-oxoisovalerate_dehydrogenase_subunit_alpha,..CUT,XP_022111352.1 2-oxoisovalerate dehydrogenase subunit alpha, mitochondrial-like [Acanthaster planci] (id=87.86%; len=445; e=0.00E+00)	865	17	4.563	0.6185	0.148466	12	9	0	7	16	11	0	8	20	15	0	11	0.929377	0.951673	0.907744	0.859141	1	0.964482	1.16395	2.75595e+06	2.82484e+06	2.69241e+06	2.54942e+06	2.96864e+06	2.8636e+06	0.745203	0.0891116	3
m.21048,m.22342	Pmi_632660_S,31078	SYWC_BOVIN_Tryptophan--tRNA_ligase,_cytoplasmic,XP_022097929.1 tryptophan--tRNA ligase, cytoplasmic-like [Acanthaster planci] (id=91.92%; len=421; e=0.00E+00)	301	14	6.079	0.5978	0.099176	13	10	0	9	12	7	0	7	16	12	0	11	0.974069	0.884832	0.981952	0.958363	0.881912	0.864882	1.13536	2.01846e+06	1.83406e+06	2.03683e+06	1.98626e+06	1.82856e+06	1.79108e+06	0.74512	0.0891665	3
m.32247	48259	XP_022079259.1 uncharacterized protein LOC110973086 [Acanthaster planci] (id=90.40%; len=302; e=0.00E+00)			4.899	0.591	0.021253					15	10	2	8	13	10	2	8	0.926763	0.991636	0.975828	0.9984	0.907469	0.933394	1.1002	1.64197e+06	1.75758e+06	1.72933e+06	1.76923e+06	1.60879e+06	1.65516e+06	0.744649	0.089481	2
PMI_028705		XP_022107075.1 uncharacterized protein LOC110988125 [Acanthaster planci] (id=75.83%; len=240; e=9.71E-135)			5.371	0.6436	0.011332	11	8	1	6	15	9	1	8	12	7	0	6	0.894117	0.944512	0.942744	0.964055	0.952438	0.968273	1.08294	2.31221e+06	2.44281e+06	2.44816e+06	2.49423e+06	2.46647e+06	2.50399e+06	0.744526	0.0895637	3
PMI_016831		XP_027869793.1 bifunctional purine biosynthesis protein PURH [Xiphophorus couchianus] (id=74.86%; len=366; e=0.00E+00)			5.953	0.7494	0.003838	53	20	0	0	100	22	0	0	98	23	0	0	0.930024	0.97092	0.889241	0.893105	0.983957	0.960611	1.10651	4.42641e+07	4.61933e+07	4.23056e+07	4.25021e+07	4.68264e+07	4.57231e+07	0.744524	0.089565	3
m.23167,m.43534	Pmi_641723_n,65425	no_annot,XP_022094725.1 putative protein TPRXL isoform X1 [Acanthaster planci] (id=70.18%; len=218; e=2.64E-32)	2348	1	2.308	0.2318	0.662967					1	1	0	0	1	1	0	0	0.643133	0.83444	0.493826	0.55248	0.851314	1	2.025	207111	268144	155179	181491	273734	319274	0.744285	0.0897243	2
PMI_009403		XP_022104980.1 thioredoxin reductase 1, cytoplasmic-like [Acanthaster planci] (id=85.60%; len=257; e=2.27E-160)			4.471	0.5533	0.007837	10	5	1	0	10	4	1	0	11	6	1	0	0.874512	0.93166	0.885079	0.84422	1	0.957776	1.18453	3.439e+06	3.66017e+06	3.48473e+06	3.31525e+06	3.91836e+06	3.75219e+06	0.744086	0.0898575	3
m.17379,m.23643,PMI_013149,m.17378,m.17384	22793,Pmi_643690_R,None,22791,22795	XP_011666947.1 PREDICTED: rab-like protein 3 isoform X4 [Strongylocentrotus purpuratus] (id=70.31%; len=229; e=3.31E-114) ,RABL3_BOVIN_Rab-like_protein_3,XP_011666943.1 PREDICTED: rab-like protein 3 isoform X1 [Strongylocentrotus purpuratus] (id=59.05%; len=254; e=6.38E-94) ,XP_011666943.1 PREDICTED: rab-like protein 3 isoform X1 [Strongylocentrotus purpuratus] (id=71.36%; len=220; e=6.25E-111) ,…	63	4	2.521	0.3431	0.161394	2	2	0	0	1	1	0	0	3	3	0	1	0.800533	0.874498	0.810728	0.881747	0.854966	0.935726	1.16888	120634	132806	122512	133432	128917	142386	0.744084	0.089859	3
PMI_016323		XP_022092115.1 phosphoenolpyruvate carboxykinase, cytosolic [GTP]-like [Acanthaster planci] (id=89.07%; len=421; e=0.00E+00)			5.994	0.6944	0.000858	70	26	10	0	94	29	12	0	94	30	13	0	0.962452	0.972844	0.910859	0.930526	0.98445	0.982123	1.08079	3.62825e+07	3.66786e+07	3.43421e+07	3.5084e+07	3.71084e+07	3.70271e+07	0.743861	0.0900084	3
PMI_001046		XP_022089254.1 uncharacterized protein LOC110978509 [Acanthaster planci] (id=72.32%; len=1557; e=0.00E+00)			2.57	0.1938	0.81089					1	1	1	0	1	1	1	0	0.740898	0.519942	0.327523	1	0.860968	0.813571	3.05322	13937.9	9528.51	6033.89	18699.6	16144.7	15301.3	0.743844	0.0900201	2
m.25311,m.32602	Pmi_650210_Z,48728	ZFN2B_HUMAN_AN1-type_zinc_finger_protein_2B,XP_006815819.1 PREDICTED: AN1-type zinc finger protein 2B-like isoform X1 [Saccoglossus kowalevskii] (id=56.63%; len=279; e=8.93E-92)	2116	2	4.054	0.4665	0.506027					2	1	0	0	3	2	0	1	0.896954	0.916067	0.771718	0.848112	1	0.936488	1.29581	129785	132328	111053	121918	144345	135094	0.743774	0.090067	2
m.25625,PMI_006671,PMI_010921	Pmi_651170_T,None,None	TLK2_DANRE_Serine/threonine-protein_kinase_tousled-like_2,XP_022090733.1 serine/threonine-protein kinase tousled-like 2 [Acanthaster planci] (id=88.99%; len=654; e=0.00E+00) ,XP_022090733.1 serine/threonine-protein kinase tousled-like 2 [Acanthaster planci] (id=82.73%; len=689; e=0.00E+00)	1915	2	2.155	0.2227	1.37382					1	1	0	0	1	1	0	0	0.723438	0.872638	0.836493	1	0.697587	0.871501	1.43351	103722	128535	121980	145401	99784.8	126883	0.74362	0.0901697	2
PMI_009474		XP_022093161.1 DNA polymerase alpha subunit B-like [Acanthaster planci] (id=79.46%; len=628; e=0.00E+00)			4.3	0.5246	0.026412	4	3	0	3	6	6	1	2	6	6	1	1	0.865399	0.940999	0.874673	0.934955	0.951798	0.96554	1.11572	227698	247156	230548	246171	250337	255509	0.743595	0.0901868	3
PMI_014959		XP_022090621.1 lysophospholipase-like protein 1 isoform X1 [Acanthaster planci] (id=84.10%; len=195; e=5.17E-114)			3.346	0.4307	0.525145	2	2	1	1					1	1	0	0	0.848115	0.760154	0.924187	1	0.731257	0.837635	1.36751	173920	156240	190234	206264	150042	173021	0.743564	0.0902073	2
PMI_016385		XP_022109269.1 pre-mRNA 3' end processing protein WDR33-like [Acanthaster planci] (id=80.36%; len=1100; e=0.00E+00)			2.791	0.5023	0.031341	5	5	1	4	3	3	0	3	1	1	0	0	0.94372	0.919225	0.891705	0.985454	0.898265	0.934048	1.10513	127776	125304	122242	133527	121833	126776	0.743411	0.0903101	3
PMI_005569		XP_022101966.1 serine/threonine-protein phosphatase PGAM5, mitochondrial-like isoform X1 [Acanthaster planci] (id=88.77%; len=285; e=0.00E+00)			5.236	0.6061	0.155231	11	9	0	9	12	9	0	9	13	10	0	10	0.928716	0.941875	0.978283	0.938949	0.965334	0.958153	1.05337	2.14745e+06	2.1752e+06	2.25723e+06	2.16531e+06	2.22684e+06	2.2098e+06	0.743306	0.0903805	3
m.28363	Pmi_660140_A	APLP_LOCMI_Apolipophorins			5.978	0.6794	0.003098	286	96	0	51	433	117	0	59	453	121	0	61	0.978884	0.979668	0.954283	0.988043	0.940941	0.98585	1.05006	1.84791e+08	1.84723e+08	1.80036e+08	1.86328e+08	1.77516e+08	1.86035e+08	0.742898	0.090655	3
m.12598	18038	XP_022096391.1 histone acetyltransferase KAT6A-like isoform X5 [Acanthaster planci] (id=75.95%; len=158; e=6.01E-77)			5.645	0.6857	0.004845	9	7	1	0	7	5	1	0					0.944269	0.880077	0.878968	0.895744	0.926449	1	1.1377	1.12881e+06	1.05208e+06	1.05075e+06	1.07081e+06	1.10751e+06	1.19544e+06	0.742772	0.0907394	2
PMI_014573,m.18798,m.47067,m.47079,m.47070	None,Pmi_621690_E,70562,70567,70563	XP_022079333.1 mammalian ependymin-related protein 1-like [Acanthaster planci] (id=64.12%; len=301; e=6.22E-113) ,EPDR1_HUMAN_Mammalian_ependymin-related_protein_1,XP_022079333.1 mammalian ependymin-related protein 1-like [Acanthaster planci] (id=64.12%; len=301; e=8.12E-113) ,XP_022079333.1 mammalian ependymin-related protein 1-like [Acanthaster planci] (id=68.00%; len=250; e=2.58E-110) ,XP_0220…	1251	6	3.217	0.4016	0.080267	4	4	0	0	3	3	0	0	6	6	0	0	0.931523	0.427882	0.774566	0.930942	0.559158	0.548248	2.17706	973269	448533	767878	968531	559813	564931	0.742534	0.0908998	3
PMI_012242		XP_022102247.1 plectin-like [Acanthaster planci] (id=71.11%; len=1014; e=0.00E+00)			3.32	0.4849	0.249005	4	4	0	4	1	1	0	0	1	1	0	0	0.72142	0.820547	0.810534	0.715021	0.712345	0.794579	1.1519	23608.2	26467.6	27287.9	23584.3	22289.4	26352.7	0.742405	0.0909862	3
m.24643	Pmi_647470_U	UK114_HUMAN_Ribonuclease_UK114			5.242	0.6562	0.014147	13	5	2	3	21	6	2	4	25	6	2	4	0.938791	0.942966	0.947117	0.970075	0.941392	0.975197	1.03878	5.1364e+06	5.15373e+06	5.18382e+06	5.30717e+06	5.15589e+06	5.34823e+06	0.742121	0.0911776	3
m.17658	Pmi_615682_T	TNPO1_HUMAN_Transportin-1			4.357	0.6247	0.093567	15	10	0	10	27	17	0	15	26	18	0	16	0.921585	0.911907	0.962502	0.945352	0.940107	0.976501	1.07083	2.12982e+06	2.1052e+06	2.22618e+06	2.18295e+06	2.17197e+06	2.25563e+06	0.741616	0.0915181	3
m.42165	63747	XP_022089190.1 cubilin-like [Acanthaster planci] (id=76.95%; len=950; e=0.00E+00)			6.972	0.7325	0.001935	105	34	0	13	139	36	0	13	137	36	0	13	0.963461	0.894676	1	0.95107	0.962771	0.935005	1.11772	3.95471e+07	3.66827e+07	4.1045e+07	3.89907e+07	3.94908e+07	3.83275e+07	0.740745	0.0921071	3
PMI_023769,m.12857,m.31463	None,Pmi_582890_N,47085	XP_022097963.1 cancer-related nucleoside-triphosphatase-like isoform X4 [Acanthaster planci] (id=71.43%; len=203; e=8.15E-92) ,NTPCR_BOVIN_Cancer-related_nucleoside-triphosphatase_homolog,XP_022097961.1 cancer-related nucleoside-triphosphatase-like isoform X2 [Acanthaster planci] (id=87.11%; len=194; e=5.37E-120)	1948	2	2.392	0.4079	0.143609	1	1	0	0	1	1	0	0	1	1	0	0	0.602437	0.773337	0.879645	0.728611	0.754467	1	1.65992	35448	45548.1	53070.3	43633.6	45281.7	60540	0.740128	0.0925254	3
m.18412	Pmi_619711_C	CSN7B_BOVIN_COP9_signalosome_complex_subunit_7b			4.792	0.6134	0.007216	10	6	1	4	7	6	1	4	8	7	1	6	0.897807	0.95679	0.986773	0.945204	0.94764	0.908223	1.09909	560897	596719	615937	590468	591025	568101	0.740059	0.0925721	3
m.52073	77659	XP_022097947.1 neuroblast differentiation-associated protein AHNAK-like [Acanthaster planci] (id=74.44%; len=90; e=1.06E-19)			5.798	0.6462	0.011207	15	7	3	0	19	8	4	0	18	7	3	0	0.852268	0.904605	0.843416	0.891362	0.92798	0.9832	1.16574	1.08672e+07	1.15206e+07	1.07349e+07	1.13369e+07	1.18089e+07	1.25389e+07	0.740012	0.0926035	3
m.45587	68336	XP_022099811.1 ceramide synthase 1-like [Acanthaster planci] (id=82.76%; len=377; e=0.00E+00)			3.868	0.3897	0.136526	2	2	1	1	1	1	1	0					0.739683	0.889695	0.952576	0.968691	0.945337	0.900467	1.3096	226228	272703	291846	296577	290292	275727	0.739725	0.0927989	2
m.22871	Pmi_640600_M	MEC2_CAEEL_Mechanosensory_protein_2			4.672	0.6514	0.014237	28	10	0	9	34	10	0	4	29	11	0	5	0.994757	0.841052	0.958382	0.963552	0.869139	0.886894	1.18275	4.77991e+06	4.02708e+06	4.60194e+06	4.63827e+06	4.1652e+06	4.25555e+06	0.739642	0.0928553	3
m.19907,PMI_013309	26702,None	XP_022079483.1 signal peptidase complex subunit 3-like [Acanthaster planci] (id=89.83%; len=177; e=2.18E-117) ,XP_022079483.1 signal peptidase complex subunit 3-like [Acanthaster planci] (id=90.39%; len=177; e=5.22E-118)	1073	4	3.189	0.5052	0.041565	2	2	0	0	3	3	0	0	6	4	0	3	0.871484	0.785905	0.867629	0.915432	0.893591	0.719215	1.27282	510736	466249	511633	543860	538119	423336	0.739231	0.0931342	3
m.32100	Pmi_670971_n	no_annot			4.112	0.5717	0.150816	4	3	2	1	4	3	2	1	3	2	2	0	0.937697	0.894521	0.860923	0.767632	0.84456	0.875134	1.22154	334989	318631	306175	272256	299632	310686	0.739181	0.0931687	3
PMI_003687		XP_022110062.1 dual serine/threonine and tyrosine protein kinase-like isoform X2 [Acanthaster planci] (id=67.25%; len=748; e=0.00E+00)			2.767	0.3773	0.436271	1	1	1	0	1	1	0	0					0.68005	0.783312	1	0.593085	0.591802	0.640297	1.68975	42994	50742.3	66902.6	35923.5	36121.1	40020.5	0.739098	0.0932251	2
m.49190,m.25690	73625,Pmi_651480_A	XP_022079162.1 acyl-CoA dehydrogenase family member 11-like [Acanthaster planci] (id=85.71%; len=784; e=0.00E+00) ,ACD11_CHICK_Acyl-CoA_dehydrogenase_family_member_11	2346	27	6.078	0.6681	0.077367	25	20	0	18	23	16	0	0	24	21	0	0	0.887297	0.961354	0.857516	0.941319	0.964657	0.982378	1.14561	2.99189e+06	3.24178e+06	2.89013e+06	3.17323e+06	3.25432e+06	3.31556e+06	0.738869	0.0933807	3
m.22878,PMI_001346	Pmi_640761_F,None	FUCM_BOVIN_Fucose_mutarotase,XP_022080570.1 fucose mutarotase-like isoform X1 [Acanthaster planci] (id=84.68%; len=124; e=7.87E-71)	486	3	3.927	0.5339	0.198939					4	3	0	0	4	2	0	0	1	0.772809	0.96968	0.938809	0.886263	0.855958	1.29398	667935	507186	650253	629755	587912	568597	0.738498	0.0936338	2
m.30015	Pmi_665540_T	TRAP1_HUMAN_Heat_shock_protein_75_kDa,_mitochondrial			5.171	0.6455	0.042288	15	13	1	12	11	7	1	6	10	8	1	0	0.829007	0.890991	0.96643	0.922392	0.892783	0.996353	1.20186	705341	756198	819169	782802	756892	845366	0.738486	0.0936422	3
m.30570	Pmi_667110_H	HTR7A_HUMAN_HEAT_repeat-containing_protein_7A			5.902	0.6271	0.001792	44	32	4	28	55	38	2	23	59	41	2	39	0.899221	0.9599	0.908769	0.936445	0.945892	1	1.11207	6.44254e+06	6.87531e+06	6.50798e+06	6.70658e+06	6.7749e+06	7.16439e+06	0.738407	0.093696	3
PMI_030034		XP_022098742.1 serpin B6-like isoform X3 [Acanthaster planci] (id=78.01%; len=382; e=0.00E+00)			4.469	0.6046	0.006382	20	13	4	1	28	18	7	0	27	17	7	0	0.898933	0.993799	0.948941	0.862939	0.969089	0.983415	1.15164	5.16326e+06	5.70664e+06	5.44797e+06	4.96318e+06	5.56543e+06	5.65215e+06	0.738385	0.0937108	3
PMI_009264		XP_022081106.1 ATP-binding cassette sub-family C member 8-like isoform X2 [Acanthaster planci] (id=65.83%; len=1235; e=0.00E+00)			4.654	0.5905	0.023248	15	11	0	11	9	7	0	7	14	11	0	10	0.971855	0.913733	0.969308	0.970371	0.911475	0.92032	1.06624	1.11865e+06	1.0514e+06	1.11412e+06	1.11708e+06	1.04888e+06	1.05999e+06	0.738369	0.0937219	3
m.30821,PMI_029840,PMI_029841	Pmi_667852_F,None,None	FOXK2_XENLA_Forkhead_box_protein_K2,XP_022095446.1 forkhead box protein K2-like isoform X2 [Acanthaster planci] (id=97.52%; len=121; e=2.10E-76) ,XP_022095446.1 forkhead box protein K2-like isoform X2 [Acanthaster planci] (id=96.69%; len=121; e=1.45E-76)	240	2	2.523	0.2691	0.386596	3	2	0	0	1	1	0	0	2	1	0	0	0.824444	0.945082	0.894395	0.916847	0.927899	0.943037	1.14633	112849	128764	121705	125550	127317	128912	0.737892	0.0940474	3
m.25074	Pmi_649200_S	SIN3A_MOUSE_Paired_amphipathic_helix_protein_Sin3a			3.066	0.39	0.142075	1	1	0	0	3	3	1	2	2	2	1	1	0.905462	0.863901	0.845984	0.856005	0.875995	0.936917	1.10749	43820.2	41947.6	40990.9	41671.2	42510.5	45572.4	0.737869	0.094063	3
PMI_005272		XP_022088783.1 lysine-specific histone demethylase 1B-like [Acanthaster planci] (id=88.00%; len=733; e=0.00E+00)			4.826	0.5839	0.011267	6	6	0	6	5	4	0	1	5	4	0	4	0.706347	0.815565	0.767135	0.962779	0.812733	0.936837	1.36304	77264.1	88153.4	84391.8	104411	87699.4	100718	0.737861	0.0940687	3
PMI_019948		BAH83664.1 minichromosome maintenance 2 [Patiria pectinifera] (id=99.43%; len=883; e=0.00E+00)			5.112	0.7003	0.009079	37	23	0	7	54	30	0	7	61	34	0	12	0.897794	0.984452	0.937413	0.933867	0.955155	0.978873	1.09652	7.78473e+06	8.54096e+06	8.13234e+06	8.09054e+06	8.27933e+06	8.48839e+06	0.73785	0.094076	3
PMI_014723		XP_022109588.1 YTH domain-containing family protein 3-like [Acanthaster planci] (id=90.34%; len=652; e=0.00E+00)			5.503	0.6853	0.066572	7	6	4	2	15	10	6	4	12	9	6	3	0.853603	0.935337	0.863607	0.926601	1	0.937107	1.1715	528784	580735	534786	575814	620670	580705	0.737603	0.0942453	3
m.13481	Pmi_587830_N	NUDT9_HUMAN_ADP-ribose_pyrophosphatase,_mitochondrial			4.184	0.6513	0.106695	12	9	0	9	16	13	0	13	15	11	0	11	0.993307	0.916645	0.948471	0.977863	0.915649	0.924131	1.08481	3.45403e+06	3.17822e+06	3.27765e+06	3.39227e+06	3.17037e+06	3.20795e+06	0.737407	0.0943788	3
m.56908,m.18168,m.56900,m.56902	85118,Pmi_618340_M,85113,85114	EKC20459.1 hypothetical protein CGI_10006041 [Crassostrea gigas] (id=23.91%; len=297; e=9.58E-08) ,MED11_XENLA_Mediator_of_RNA_polymerase_II_transcription_s..CUT,EKC31385.1 hypothetical protein CGI_10019247 [Crassostrea gigas] (id=24.56%; len=285; e=1.20E-07) ,EKC20459.1 hypothetical protein CGI_10006041 [Crassostrea gigas] (id=23.91%; len=297; e=8.44E-08)	2003	3	3.446	0.516	0.150687	1	1	0	0	3	3	0	0	1	1	0	0	0.800482	0.77931	0.926727	0.960832	0.899616	0.94641	1.23293	62599.7	60821.8	75966	79710.6	72225.8	76489.9	0.737177	0.0945365	3
m.16559	Pmi_608810_M	MYO1F_HUMAN_Unconventional_myosin-If			5.363	0.6619	0.06138	2	1	1	0	7	4	2	2	4	3	2	0	0.842098	0.844194	1	0.865704	0.87855	0.840217	1.19017	492126	492831	584156	506913	512582	491476	0.736851	0.0947601	3
PMI_012779		XP_022091283.1 uncharacterized protein LOC110979616 isoform X1 [Acanthaster planci] (id=66.71%; len=766; e=0.00E+00)			4.492	0.6363	0.025729	12	10	0	8	13	11	0	9	18	13	0	9	0.892584	0.954305	0.928214	0.920149	0.98554	0.985758	1.10439	1.2305e+06	1.31559e+06	1.27961e+06	1.26858e+06	1.35877e+06	1.35896e+06	0.736592	0.0949375	3
m.8597	Pmi_537300_L	LPH_HUMAN_Lactase-phlorizin_hydrolase			5.48	0.6889	0.092684	6	5	1	0	9	6	1	0	10	8	2	0	0.931963	0.893255	0.923349	0.957191	0.893639	0.924044	1.07158	956749	918109	948247	984252	919139	951949	0.736365	0.0950932	3
PMI_008387,PMI_011224,m.29205	None,None,Pmi_662880_A	XP_022109223.1 serine/threonine-protein phosphatase 6 regulatory ankyrin repeat subunit A-like [Acanthaster planci] (id=91.07%; len=1075; e=0.00E+00) ,XP_022109223.1 serine/threonine-protein phosphatase 6 regulatory ankyrin repeat subunit A-like [Acanthaster planci] (id=90.98%; len=1075; e=0.00E+00) ,ANR28_MOUSE_Serine/threonine-protein_phosphatase_6_regula..CUT	38	8	4.161	0.5239	0.267404	5	5	0	4	2	2	0	1	1	1	0	0	0.709657	0.766129	0.769276	0.807525	0.882391	0.851985	1.24341	174378	189526	190171	197326	222876	208762	0.736312	0.09513	3
m.17222	Pmi_613000_C	CMC1_PONAB_Calcium-binding_mitochondrial_carrier_protein_Aralar1			4.808	0.6138	0.0275	23	14	2	12	24	16	1	14	22	16	2	14	0.950119	0.921439	0.963203	0.99105	0.856005	0.896943	1.15776	3.1399e+06	3.03911e+06	3.18369e+06	3.27703e+06	2.82053e+06	2.96219e+06	0.736072	0.0952943	3
PMI_002122,PMI_014702,PMI_029422		XP_022098085.1 cytochrome P450 2J1-like [Acanthaster planci] (id=73.35%; len=514; e=0.00E+00) ,XP_022080018.1 cytochrome P450 2J6-like [Acanthaster planci] (id=79.88%; len=492; e=0.00E+00) ,XP_022080018.1 cytochrome P450 2J6-like [Acanthaster planci] (id=78.69%; len=183; e=5.42E-98)	2444	1	2.155	0.3174	0.125317	1	1	0	0					1	1	0	0	0.848645	0.346784	0.759644	0.986619	0.505585	0.508091	2.84506	618825	253232	534697	751646	376105	385321	0.735703	0.0955487	2
m.31517	Pmi_669570_S	SYMPK_HUMAN_Symplekin			3.828	0.44	0.111627	5	5	0	5	4	4	0	1	3	2	0	2	0.899418	0.969217	0.937188	0.956768	0.932545	0.951573	1.0776	243994	263188	254383	259931	253092	258361	0.735617	0.0956077	3
PMI_026072,m.16873	None,Pmi_610941_T	XP_022100376.1 transmembrane protein 33-like [Acanthaster planci] (id=84.64%; len=280; e=2.07E-167) ,TMM33_RAT_Transmembrane_protein_33	772	3	2.798	0.6002	0.384071	3	3	0	1	3	2	0	1	2	2	0	0	0.917495	0.859622	0.967132	1	0.828522	0.908384	1.20697	357402	333043	375722	388759	322675	353765	0.735461	0.095715	3
PMI_007775		XP_022096910.1 uncharacterized protein LOC110982623 isoform X6 [Acanthaster planci] (id=59.91%; len=636; e=0.00E+00)			3.273	0.4531	0.005492	4	3	0	3	9	3	0	3					0.911063	0.926582	0.836092	0.808567	0.970131	1	1.23676	935927	950804	858075	830253	995979	1.02652e+06	0.735325	0.0958085	2
PMI_026769,m.49515	None,74058	XP_022100718.1 B-cell receptor-associated protein 31-like [Acanthaster planci] (id=89.03%; len=237; e=2.78E-140) ,XP_022100718.1 B-cell receptor-associated protein 31-like [Acanthaster planci] (id=88.61%; len=237; e=1.57E-139)	671	15	4.988	0.5713	0.009599	13	10	0	8	19	13	0	9	18	13	0	11	0.875298	0.916961	0.87982	0.929468	0.952315	0.996656	1.13865	1.96632e+06	2.06077e+06	1.97545e+06	2.08516e+06	2.13999e+06	2.2403e+06	0.73485	0.096136	3
PMI_012677		XP_022087988.1 glutathione reductase, mitochondrial-like [Acanthaster planci] (id=79.19%; len=543; e=0.00E+00)			5.775	0.6361	0.03956	14	9	1	8	18	12	2	1	21	14	2	1	0.978593	0.927201	0.947015	0.974728	0.933476	0.924863	1.05809	5.8794e+06	5.54778e+06	5.67674e+06	5.86508e+06	5.58506e+06	5.53859e+06	0.734661	0.0962668	3
m.11932	Pmi_575270_F	FKBP7_PONAB_Peptidyl-prolyl_cis-trans_isomerase_FKBP7			5.365	0.6167	0.034969	8	6	2	4	15	13	1	11	10	8	1	7	0.862824	0.892996	0.917415	0.948508	0.897003	1	1.15899	758159	784657	806079	833156	787796	878493	0.734633	0.096286	3
PMI_012294		XP_022109553.1 gamma-secretase subunit PEN-2-like [Acanthaster planci] (id=86.14%; len=101; e=3.27E-59)			3.136	0.4719	0.063448	3	2	1	1	1	1	0	0	1	1	0	0	0.798208	0.974456	0.874052	0.632535	0.892152	0.952243	1.54056	162521	198248	176503	127249	182175	193920	0.734416	0.0964357	3
m.28595	Pmi_660971_D	DYH10_HUMAN_Dynein_heavy_chain_10,_axonemal			5.917	0.5633	0.042989	3	3	0	2	5	5	0	3	4	3	0	0	0.812421	0.899935	0.825384	0.944579	0.776637	0.914261	1.21624	187336	202608	188317	214560	175263	205941	0.734166	0.0966089	3
m.30108,m.30107,m.30106,m.15036	44861,44860,44859,Pmi_599030_S	XP_022093193.1 syntaxin-like isoform X6 [Acanthaster planci] (id=96.19%; len=289; e=0.00E+00) ,XP_022093190.1 syntaxin-like isoform X3 [Acanthaster planci] (id=97.25%; len=291; e=0.00E+00) ,XP_022093192.1 syntaxin-like isoform X5 [Acanthaster planci] (id=94.14%; len=290; e=0.00E+00) ,STX_APLCA_Syntaxin	2159	4	3.393	0.4139	0.33202					3	3	0	1	3	2	0	1	0.903287	0.91574	0.747888	0.964041	0.838812	0.974551	1.30307	86564.9	87072.7	71216.3	92290.4	80099	92782.3	0.734163	0.0966104	2
m.28597	Pmi_660972_L	L14BB_XENLA_Protein_LSM14_homolog_B-B			6.33	0.6555	0.002307	41	16	0	0	58	20	0	0	43	13	0	0	0.945359	1	0.897931	0.851373	0.924357	0.94776	1.17457	2.90679e+07	3.07329e+07	2.76203e+07	2.61675e+07	2.8418e+07	2.91481e+07	0.733996	0.0967265	3
m.4291	7394	XP_022091209.1 ATP-dependent 6-phosphofructokinase-like isoform X2 [Acanthaster planci] (id=88.08%; len=151; e=1.85E-87)			5.733	0.6078	0.042186	5	4	0	3	10	7	0	7	9	7	0	7	0.986213	0.909635	0.922499	0.880388	0.947942	0.953555	1.1202	1.17016e+06	1.07629e+06	1.0938e+06	1.04526e+06	1.12471e+06	1.13477e+06	0.733913	0.0967839	3
PMI_002562,PMI_004351		XP_022105848.1 focadhesin-like [Acanthaster planci] (id=68.07%; len=523; e=0.00E+00) ,XP_022105848.1 focadhesin-like [Acanthaster planci] (id=76.84%; len=708; e=0.00E+00)	1607	1	3.618	0.4154	0.98335					1	1	0	0	1	1	0	0	0.315087	0.551666	0.87431	0.539626	0.969488	0.624106	3.07689	2499.06	4121.19	6688.94	3966.07	7940.42	4318.12	0.733792	0.0968673	2
m.16608	21910	XP_022086566.1 ras-related protein Rab-24-like [Acanthaster planci] (id=85.05%; len=194; e=9.81E-117)			4.202	0.6811	0.067172	5	4	1	3	7	5	0	4	4	3	0	1	0.822628	0.925693	0.938185	0.997217	0.80495	0.875052	1.23886	378906	428090	435590	463019	372176	407093	0.733783	0.0968739	3
PMI_005941		XP_022080973.1 GTP-binding protein SAR1b-like [Acanthaster planci] (id=71.88%; len=192; e=3.10E-93)			5.457	0.624	0.051041	10	5	5	0	13	6	6	0	15	6	6	0	0.8533	0.968555	0.880993	0.878877	0.87317	0.963528	1.13507	1.90868e+06	2.16594e+06	1.97008e+06	1.96849e+06	1.94828e+06	2.15962e+06	0.7336	0.0970004	3
PMI_017446		XP_022084832.1 SUMO-conjugating enzyme UBC9-B-like [Acanthaster planci] (id=81.59%; len=201; e=3.24E-118)			3.616	0.4694	0.055366	5	3	1	2	5	4	3	1	7	5	2	3	0.906174	0.96988	0.887811	0.91971	0.96672	0.956164	1.09244	825497	881296	804126	837572	874650	864400	0.733597	0.0970022	3
m.17662	Pmi_615780_O	ODPX_BOVIN_Pyruvate_dehydrogenase_protein_X_component			3.325	0.4373	0.038787	3	3	1	2	7	5	2	3	5	4	2	0	0.907783	0.943582	0.897371	0.908535	0.885237	0.983168	1.11063	636150	660190	629951	636144	620396	689382	0.733448	0.097106	3
m.18410	Pmi_619710_W	WIPI2_CHICK_WD_repeat_domain_phosphoinositide-interacting..CUT			4.743	0.5334	0.025034	1	1	1	0	2	2	2	0	3	3	3	0	0.714293	0.797109	0.813754	0.790405	0.752754	0.798237	1.13924	173638	182332	198062	184629	177149	186093	0.733361	0.097166	3
PMI_019931		XP_022089049.1 adipocyte plasma membrane-associated protein-like [Acanthaster planci] (id=78.34%; len=397; e=0.00E+00)			5.458	0.6285	0.008174	15	11	0	9	23	17	0	16	20	14	0	13	0.946504	0.966798	0.92207	0.94161	0.95639	0.93968	1.04851	2.33601e+06	2.38651e+06	2.26689e+06	2.32228e+06	2.35684e+06	2.31621e+06	0.733334	0.0971849	3
m.24931	Pmi_648730_R	RBMX_DANRE_RNA-binding_motif_protein,_X_chromosome			4.038	0.5141	0.014172	5	5	1	4	6	6	1	5	5	5	0	4	0.854219	0.922045	0.837155	0.850252	0.975825	0.961948	1.16564	163346	176411	160119	162689	186493	183945	0.732768	0.0975772	3
m.31335,m.23007	46869,Pmi_640931_P	XP_022086759.1 prostaglandin reductase 2-like isoform X1 [Acanthaster planci] (id=87.32%; len=355; e=0.00E+00) ,PTGR2_PONAB_Prostaglandin_reductase_2	2047	3	3.713	0.4708	0.456256	1	1	0	0	2	2	0	2	3	3	0	3	0.762984	0.878438	0.746173	0.853917	0.796264	0.886126	1.18756	81819.2	94118.9	80731.2	91420.4	85259.5	94435.6	0.732736	0.0975995	3
PMI_000327		XP_022081803.1 tubulin alpha-1C chain-like [Acanthaster planci] (id=88.91%; len=451; e=0.00E+00)			5.051	0.6701	0.00166	52	10	1	1	67	13	1	2	71	15	2	2	0.939028	0.811601	0.944796	0.974205	0.835987	0.879521	1.20035	4.40285e+07	3.8004e+07	4.43536e+07	4.5788e+07	3.927e+07	4.13099e+07	0.731748	0.0982874	3
m.25565,PMI_007026	Pmi_650990_S,None	SNPC3_RAT_snRNA-activating_protein_complex_subunit_3,XP_022104736.1 snRNA-activating protein complex subunit 3-like [Acanthaster planci] (id=75.91%; len=386; e=0.00E+00)	101	1	2.858	0.3191	1.95468					1	1	0	0	1	1	0	0	0.907096	0.898312	0.948861	0.989607	0.791984	0.919133	1.24953	31617	31467.8	33156.2	34794.3	27596.5	32097.9	0.731705	0.098317	2
m.19796	Pmi_626600_Z	ZFY19_HUMAN_Zinc_finger_FYVE_domain-containing_protein_19			3.372	0.5033	0.01352	2	2	0	1	6	6	0	4	3	3	0	2	0.849048	0.903535	0.882271	0.866249	0.946347	0.978315	1.15225	152263	161855	158027	155139	169508	175344	0.731658	0.0983498	3
PMI_018482,m.37179	None,56142	XP_022095571.1 dynein heavy chain 3, axonemal-like [Acanthaster planci] (id=87.49%; len=1383; e=0.00E+00) ,XP_022095571.1 dynein heavy chain 3, axonemal-like [Acanthaster planci] (id=95.13%; len=1416; e=0.00E+00)	1484	3	2.608	0.2405	0.035193	1	1	0	0	2	2	0	0	1	1	0	0	0.967237	0.741878	0.866819	0.826676	0.5942	0.59438	1.6278	159898	117936	133417	132378	81366.3	78737.9	0.73145	0.0984948	3
m.13006	Pmi_584250_P	PIPNA_BOVIN_Phosphatidylinositol_transfer_protein_alpha_isoform			4.184	0.539	0.012183	12	10	5	5	16	11	4	7	20	13	6	7	0.930249	0.957391	0.934998	0.916607	0.978246	0.982112	1.07147	5.45654e+06	5.61539e+06	5.48324e+06	5.37695e+06	5.7369e+06	5.75466e+06	0.731151	0.0987037	3
m.43842,PMI_015139	65914,None	XP_022109459.1 pectin acetylesterase 5-like isoform X1 [Acanthaster planci] (id=72.46%; len=443; e=0.00E+00) ,XP_022109459.1 pectin acetylesterase 5-like isoform X1 [Acanthaster planci] (id=72.01%; len=443; e=0.00E+00)	1335	1	3.06	0.3876	0.242449	1	1	0	0	1	1	0	0					0.683366	0.773426	1	0.816592	0.77931	0.942094	1.46334	21700.8	24414.4	31466.2	25694.8	24704.1	29729.8	0.730777	0.0989646	2
PMI_024663,PMI_018959		XP_022092727.1 uncharacterized protein LOC110980399 [Acanthaster planci] (id=74.12%; len=313; e=3.59E-171) ,XP_022092727.1 uncharacterized protein LOC110980399 [Acanthaster planci] (id=75.16%; len=322; e=5.01E-179)	59	2	3.418	0.4281	0.600856					3	2	0	2	1	1	0	0	0.793603	0.87688	0.918037	0.86166	1	0.640439	1.56143	94664.1	104683	109412	102858	119562	76973.4	0.730759	0.0989775	2
m.20287,PMI_003901	Pmi_628900_P,None	PM14_HUMAN_Pre-mRNA_branch_site_protein_p14,XP_022088905.1 splicing factor 3B subunit 6-like [Acanthaster planci] (id=88.00%; len=125; e=7.17E-77)	745	4	3.696	0.6237	0.057803	4	3	0	0	5	3	0	0	5	4	0	0	0.913111	0.920097	0.962726	0.883397	0.959617	0.896157	1.0898	601776	606840	633976	582122	631808	590381	0.730745	0.0989872	3
m.25846,m.30818	Pmi_651971_P,45963	PIGT_HUMAN_GPI_transamidase_component_PIG-T,XP_022082353.1 GPI transamidase component PIG-T-like [Acanthaster planci] (id=83.89%; len=509; e=0.00E+00)	1020	3	2.877	0.4458	0.839295	1	1	0	0	1	1	0	0	1	1	0	0	0.802659	0.798812	0.906692	0.761559	0.81594	0.928089	1.21867	67657.8	67079.1	76156.7	64585.1	68829.6	77712.4	0.730691	0.0990252	3
m.21742,m.46368,PMI_007143	Pmi_635790_T,69433,None	TMX1_MOUSE_Thioredoxin-related_transmembrane_protein_1,XP_022095685.1 thioredoxin-related transmembrane protein 1-like isoform X1 [Acanthaster planci] (id=75.96%; len=287; e=1.61E-158) ,XP_022095686.1 thioredoxin-related transmembrane protein 1-like isoform X2 [Acanthaster planci] (id=72.83%; len=254; e=3.11E-129)	1003	5	3.458	0.4858	0.153687	3	3	0	2	2	2	0	1	4	3	0	0	0.866637	0.836987	0.78106	0.838315	1	0.935044	1.28031	178867	172402	161577	173214	206007	193270	0.730583	0.0991004	3
m.29422	Pmi_663521_G	GLT1_SCHPO_Putative_glutamate_synthase_[NADPH]			4.898	0.615	0.080191	7	7	1	2	6	6	0	3	6	6	0	1	0.798311	0.997226	0.98224	0.865711	0.870288	0.928418	1.24917	362297	454200	447042	393521	395662	421273	0.730081	0.0994515	3
m.19284	Pmi_624222_G	GSHB_BOVIN_Glutathione_synthetase			3.949	0.4981	0.035134	7	7	0	6	8	8	0	7	9	9	0	8	0.893692	0.968432	0.937781	0.848505	0.937482	0.994931	1.17257	1.18254e+06	1.29301e+06	1.24489e+06	1.13037e+06	1.24931e+06	1.33014e+06	0.729654	0.0997509	3
m.19568	Pmi_625491_n	no_annot			4.989	0.4524	0.013299	11	6	0	2	11	7	0	6	13	9	0	7	0.857588	0.909287	0.901098	0.948545	0.971215	0.988113	1.1522	3.50173e+06	3.72136e+06	3.68244e+06	3.87131e+06	3.97051e+06	4.0438e+06	0.729549	0.0998247	3
m.11514	Pmi_571150_K	K0614_HUMAN_Probable_E3_ubiquitin-protein_ligase_C12orf51			2.603	0.2263	0.253335	2	2	1	1					1	1	1	0	0.885673	0.935486	0.947781	0.979657	1	0.919191	1.12909	58492.3	61848	62547.2	64718.2	66130	60821.1	0.72941	0.0999222	2
PMI_012531		XP_022096293.1 eIF-2-alpha kinase activator GCN1-like [Acanthaster planci] (id=79.69%; len=778; e=0.00E+00)			4.384	0.605	0.006683	15	11	0	4	12	10	1	4	17	13	0	6	0.879722	0.979129	0.920004	0.949324	0.928264	0.982568	1.11691	3.46634e+06	3.86118e+06	3.62676e+06	3.74232e+06	3.65937e+06	3.87629e+06	0.729342	0.0999697	3
m.19459	Pmi_624840_F	FBP1_STRPU_Fibropellin-1			5.263	0.6466	0.010647	15	5	0	2	21	9	0	2	17	8	0	1	0.879092	0.855037	0.923823	1	0.832404	0.849101	1.20134	4.70957e+06	4.54654e+06	4.92456e+06	5.32905e+06	4.43907e+06	4.52206e+06	0.729105	0.100137	3
m.33056,m.25134,PMI_000556	49446,Pmi_649422_W,None	XP_022083354.1 RCC1-like G exchanging factor-like protein [Acanthaster planci] (id=76.28%; len=527; e=0.00E+00) ,WBS16_MOUSE_Williams-Beuren_syndrome_chromosomal_region_..CUT,XP_022083354.1 RCC1-like G exchanging factor-like protein [Acanthaster planci] (id=71.38%; len=559; e=0.00E+00)	547	1	2.38	0.3597	1.24854	1	1	0	0					1	1	0	0	0.715216	0.781161	0.8446	0.591238	0.802759	1	1.69137	13913.8	15300.1	16358.7	11548.9	15629.9	19667.5	0.729047	0.100177	2
PMI_003953		XP_022104423.1 tyrosine--tRNA ligase, cytoplasmic-like [Acanthaster planci] (id=68.12%; len=276; e=9.07E-112)			5.474	0.5434	0.086017					8	6	0	0	8	6	1	0	0.77312	0.808919	0.862826	0.811207	1	0.915443	1.29346	1.34844e+06	1.41196e+06	1.50772e+06	1.42133e+06	1.76132e+06	1.61076e+06	0.729032	0.100188	2
PMI_010121		XP_011670570.1 PREDICTED: serine/threonine-protein kinase 31, partial [Strongylocentrotus purpuratus] (id=34.01%; len=738; e=4.37E-106)			4.576	0.5987	0.007825	31	23	0	17					27	22	0	16	0.864384	0.941292	0.871132	0.895209	0.93983	1	1.15689	3.70254e+06	4.02986e+06	3.73421e+06	3.83297e+06	4.02386e+06	4.29087e+06	0.728909	0.100274	2
PMI_011348,PMI_010189,m.7295,m.13111,PMI_000235	None,None,11681,Pmi_584952_P,None	XP_022103651.1 zinc finger protein 91-like [Acanthaster planci] (id=75.08%; len=1332; e=0.00E+00) ,XP_022092509.1 WD repeat-containing protein 90-like isoform X2 [Acanthaster planci] (id=92.89%; len=914; e=0.00E+00) ,XP_022103651.1 zinc finger protein 91-like [Acanthaster planci] (id=76.32%; len=152; e=7.85E-71) ,PRDM9_MOUSE_Histone-lysine_N-methyltransferase_PRDM9,XP_022092509.1 WD repeat-contai…	1756	1	1.844	0.2084	0.046469	2	1	0	0	1	1	0	0	2	1	0	0	0.699481	0.791823	0.555996	0.360778	0.986556	0.791042	2.73452	533927	593876	413120	268086	754125	605523	0.728689	0.100429	3
PMI_018714		PIK54089.1 hypothetical protein BSL78_09017 [Apostichopus japonicus] (id=55.43%; len=819; e=0.00E+00)			2.602	0.3739	0.183321	2	2	1	1	2	2	2	0	3	3	2	1	0.659487	0.873632	0.783327	0.764739	0.904617	0.813587	1.3717	53093.3	73563	63013.2	62293.5	77953.7	65491	0.728523	0.100546	3
PMI_016813		XP_022083820.1 thymocyte nuclear protein 1-like [Acanthaster planci] (id=82.08%; len=212; e=3.10E-125)			3.093	0.5393	0.231373	3	3	1	2	4	3	1	2	1	1	0	0	0.880085	0.935792	0.885143	0.814326	0.910524	0.951229	1.16812	343245	364901	344939	317913	354644	369936	0.728496	0.100564	3
PMI_007242		XP_022083588.1 unconventional myosin-X-like isoform X2 [Acanthaster planci] (id=87.98%; len=1339; e=0.00E+00)			4.148	0.5361	0.025375	15	12	0	4	18	17	1	2	14	12	1	3	0.865937	0.974023	0.951217	0.956349	0.949724	0.992685	1.14637	1.06502e+06	1.19925e+06	1.17278e+06	1.17963e+06	1.16652e+06	1.22139e+06	0.728482	0.100574	3
m.21768	Pmi_635890_C	CG025_RAT_UPF0415_protein_C7orf25_homolog			4.514	0.5	0.159046	3	3	0	0	3	3	0	0	3	3	1	2	0.687554	0.843723	0.895795	0.950987	0.829539	0.965699	1.40454	102994	128498	135557	144671	124071	146432	0.728245	0.100741	3
m.18986	Pmi_622690_S	SPHM_HUMAN_N-sulphoglucosamine_sulphohydrolase			4.74	0.6215	0.085075	7	3	1	2					12	6	0	6	0.862387	0.992979	0.91431	0.918141	0.91963	0.986168	1.15143	1.61927e+06	1.86651e+06	1.71967e+06	1.72465e+06	1.7276e+06	1.85267e+06	0.72809	0.100851	2
PMI_019856,m.37004,PMI_004035,m.17328	None,55780,None,Pmi_613920_S	XP_022094332.1 DNA replication complex GINS protein SLD5-like [Acanthaster planci] (id=94.14%; len=222; e=1.61E-150) ,XP_022094332.1 DNA replication complex GINS protein SLD5-like [Acanthaster planci] (id=94.14%; len=222; e=9.55E-151) ,XP_022094332.1 DNA replication complex GINS protein SLD5-like [Acanthaster planci] (id=93.24%; len=222; e=1.31E-149) ,SLD5_RAT_DNA_replication_complex_GINS_protein…	211	3	2.84	0.4581	0.285084	1	1	0	0	3	3	0	0	2	2	0	0	0.882655	0.898748	0.922223	0.844743	0.945481	0.964005	1.14118	381908	388281	398852	365925	408520	417173	0.72809	0.100851	3
m.27351	39829	XP_022092468.1 BTB/POZ domain-containing protein 17-like [Acanthaster planci] (id=75.10%; len=510; e=0.00E+00)			4.041	0.5588	0.072291					9	8	0	7	8	6	0	0	0.875481	0.951398	0.88557	0.90486	0.953156	1	1.14223	458679	498862	463867	474234	499927	524309	0.727773	0.101074	2
PMI_003682		XP_022092031.1 diphosphomevalonate decarboxylase-like [Acanthaster planci] (id=89.19%; len=407; e=0.00E+00)			2.85	0.5014	0.074755					2	2	0	2	4	3	0	2	0.583759	0.735888	0.724142	0.732219	1	0.797405	1.71304	128833	163103	160810	161679	230706	175547	0.727763	0.101081	2
m.30059	Pmi_665614_K	KINH_STRPU_Kinesin_heavy_chain			5.065	0.5886	0.015502	12	11	0	11	16	14	0	12	21	18	0	1	0.86538	0.922944	0.918973	0.930307	0.944271	1	1.15556	682028	726802	723606	732605	744497	788335	0.727672	0.101145	3
m.8253	Pmi_533210_T	TRPC5_MOUSE_Short_transient_receptor_potential_channel_5			4.376	0.5073	0.090225	2	1	0	0	6	4	1	3	5	4	1	3	0.885025	0.931993	0.925509	0.90135	0.918476	0.897618	1.05307	730953	762940	752918	730455	748453	726783	0.727327	0.101389	3
PMI_004812		XP_022089991.1 28S ribosomal protein S31, mitochondrial-like [Acanthaster planci] (id=56.44%; len=163; e=3.10E-48)			3.142	0.2973	0.56983					3	2	1	0	1	1	1	0	0.915291	0.943601	0.843303	0.797428	0.982586	0.940371	1.2322	58351.5	59814.7	53256.7	50686.9	62997.8	59854	0.727201	0.101478	2
PMI_012138		XP_022094338.1 shootin-1-like isoform X1 [Acanthaster planci] (id=75.05%; len=549; e=0.00E+00)			5.983	0.5977	0.015757	12	10	1	6	8	5	0	1	14	13	2	10	0.854996	0.937931	0.935571	0.949068	0.959456	0.964699	1.12831	911895	998287	996872	1.0122e+06	1.0217e+06	1.02706e+06	0.727091	0.101556	3
PMI_008088,m.34648	None,52170	XP_022084995.1 NADH dehydrogenase [ubiquinone] 1 alpha subcomplex subunit 6-like [Acanthaster planci] (id=90.40%; len=125; e=2.65E-77) ,XP_022084995.1 NADH dehydrogenase [ubiquinone] 1 alpha subcomplex subunit 6-like [Acanthaster planci] (id=90.40%; len=125; e=1.59E-77)	292	7	3.455	0.4146	0.243869	6	6	0	0	5	4	0	0	3	3	0	0	0.964579	0.862669	0.98293	0.933642	0.905596	0.85309	1.1522	1.04628e+06	936682	1.0624e+06	1.01112e+06	977509	926317	0.726971	0.101641	3
PMI_003933		XP_022108904.1 ran-specific GTPase-activating protein-like [Acanthaster planci] (id=79.92%; len=259; e=1.30E-140)			4.73	0.6056	0.005858	19	13	0	11	37	20	0	17	33	18	1	17	0.930794	0.920372	0.972351	0.943629	0.98521	0.980085	1.07045	3.42212e+06	3.38264e+06	3.57803e+06	3.46933e+06	3.62348e+06	3.60493e+06	0.726896	0.101694	3
PMI_015335		XP_022104150.1 E3 ubiquitin-protein ligase MIB2-like isoform X1 [Acanthaster planci] (id=78.16%; len=879; e=0.00E+00)			3.426	0.4227	0.285768	2	2	0	1	4	4	1	3	2	2	0	1	0.726432	0.797293	0.767766	0.808138	0.816196	0.976426	1.34414	166262	181297	176136	186583	185196	225221	0.726838	0.101735	3
m.23409	Pmi_642790_N	NU133_MOUSE_Nuclear_pore_complex_protein_Nup133			4.884	0.528	0.0603	13	10	3	1	14	11	4	2	15	14	5	4	0.879224	0.916819	0.949056	0.983521	0.893164	0.93895	1.11862	795235	825951	860876	892249	806424	846382	0.7268	0.101762	3
m.20088	Pmi_628130_S	SYK_MOUSE_Lysine--tRNA_ligase			4.509	0.5913	0.020293	15	10	8	2	23	12	7	5	28	16	8	8	0.941226	0.939521	0.957371	0.978398	0.953199	0.967346	1.04138	3.13272e+06	3.12129e+06	3.19497e+06	3.26522e+06	3.17442e+06	3.2263e+06	0.726617	0.101891	3
m.26933	Pmi_655810_C	CNDP2_HUMAN_Cytosolic_non-specific_dipeptidase			5.248	0.6339	0.009186	30	16	0	14	62	25	2	21	67	28	2	23	0.907689	0.956465	0.938837	0.940728	0.9848	0.985821	1.08608	1.92716e+07	2.03309e+07	1.99281e+07	1.99711e+07	2.09096e+07	2.09404e+07	0.726461	0.102002	3
PMI_008615,m.20252	None,Pmi_628810_D	XP_022102412.1 dynein intermediate chain 3, ciliary [Acanthaster planci] (id=92.89%; len=577; e=0.00E+00) ,DYI3_ANTCR_Dynein_intermediate_chain_3,_ciliary	1365	10	5.458	0.6331	0.043604	10	8	0	3	7	6	0	2	8	8	0	2	0.970164	0.901723	0.984442	0.979999	0.975462	0.893969	1.1012	864939	800984	879698	874858	869099	796984	0.726278	0.102131	3
m.20437	Pmi_629760_P	PSA2_HUMAN_Proteasome_subunit_alpha_type-2			5.822	0.6052	0.037657	22	13	3	9	28	14	3	10	29	13	4	9	0.908277	0.929524	0.942336	0.858275	1	0.907617	1.16513	7.39147e+06	7.56799e+06	7.66629e+06	6.98469e+06	8.13708e+06	7.38632e+06	0.726246	0.102154	3
m.19502	Pmi_625290_M	MRGBP_HUMAN_MRG-binding_protein			4.093	0.4744	0.228992	3	2	1	1	2	2	1	1	4	3	1	2	0.828531	0.821311	0.751595	0.905132	0.988232	0.971804	1.31485	347661	343170	315264	379751	413517	406747	0.725701	0.102541	3
m.31151,PMI_026069,m.34788	Pmi_668750_n,None,52435	no_annot,XP_022083899.1 uncharacterized protein LOC110975609 [Acanthaster planci] (id=49.24%; len=1702; e=0.00E+00) ,XP_022083899.1 uncharacterized protein LOC110975609 [Acanthaster planci] (id=42.20%; len=884; e=3.46E-142)	2519	1	2.655	0.2322	0.173087					2	1	0	0	1	1	0	0	0.682145	0.869934	0.691692	0.657479	1	0.874846	1.52096	204000	256416	204851	195612	296743	259356	0.725666	0.102565	2
PMI_021735		XP_022084568.1 angiotensin-converting enzyme-like isoform X1 [Acanthaster planci] (id=81.63%; len=637; e=0.00E+00)			4.653	0.6181	0.015106	10	6	0	5	16	12	0	9	11	9	0	6	0.900526	0.926105	0.8875	0.911945	0.921541	0.901722	1.0435	1.78662e+06	1.84226e+06	1.76384e+06	1.81415e+06	1.83745e+06	1.78657e+06	0.725664	0.102567	3
m.37502	56703	XP_022092583.1 enoyl-CoA delta isomerase 1, mitochondrial-like [Acanthaster planci] (id=85.76%; len=302; e=0.00E+00)			5.878	0.6456	0.035864	14	11	0	10	22	11	0	10	20	11	0	10	0.881846	0.918831	0.924048	0.909024	0.920815	1	1.13398	2.73253e+06	2.84685e+06	2.86305e+06	2.8137e+06	2.85255e+06	3.10059e+06	0.725641	0.102583	3
m.21461,PMI_001498,m.48282	Pmi_634610_S,None,72132	SMC4_XENLA_Structural_maintenance_of_chromosomes_protein_4,XP_022107039.1 structural maintenance of chromosomes protein 4-like [Acanthaster planci] (id=91.16%; len=1267; e=0.00E+00) ,XP_022107039.1 structural maintenance of chromosomes protein 4-like [Acanthaster planci] (id=91.16%; len=1267; e=0.00E+00)	592	21	3.887	0.4932	0.010534	10	10	0	0	14	12	0	0	14	14	0	0	0.876207	0.953781	0.967647	0.927392	0.944032	0.978364	1.11659	867886	944545	956602	918492	932694	968602	0.725513	0.102675	3
m.49431,PMI_003170,m.30251	73884,None,Pmi_666130_E	XP_022091761.1 clathrin interactor 1-like isoform X5 [Acanthaster planci] (id=77.28%; len=735; e=0.00E+00) ,XP_022091758.1 clathrin interactor 1-like isoform X2 [Acanthaster planci] (id=76.35%; len=761; e=0.00E+00) ,EPN4_HUMAN_Clathrin_interactor_1	736	6	4.326	0.5164	0.005115	3	3	0	2	4	4	0	0	4	4	0	0	0.852191	0.83087	0.77916	0.837344	0.828025	0.855058	1.09741	345263	324995	303810	331128	323042	339236	0.72549	0.10269	3
m.14919	Pmi_598230_Q	QORL2_NEMVE_Quinone_oxidoreductase-like_protein_2_homolog			4.188	0.553	0.104936	7	6	1	5	8	5	1	4	9	6	1	5	0.913743	0.888087	0.961902	0.916675	0.931738	0.926752	1.08312	1.12334e+06	1.08705e+06	1.1801e+06	1.123e+06	1.13436e+06	1.12875e+06	0.725437	0.102729	3
PMI_006571		XP_022097754.1 nuclear pore complex protein Nup107-like [Acanthaster planci] (id=84.67%; len=959; e=0.00E+00)			4.33	0.5877	0.073065	12	10	2	8	15	13	0	10	18	14	1	12	0.899574	0.992289	0.904782	0.898815	0.970714	0.956064	1.104	1.20275e+06	1.32812e+06	1.21051e+06	1.20248e+06	1.29881e+06	1.27976e+06	0.725001	0.103038	3
PMI_009518		XP_022110107.1 dynein heavy chain 1, axonemal-like isoform X1 [Acanthaster planci] (id=92.05%; len=2376; e=0.00E+00)			2.843	0.4288	0.171218					4	4	0	4	3	3	0	3	0.793399	0.880234	0.976357	0.978713	0.917035	0.96167	1.23357	483256	535422	594060	596089	557845	585791	0.724995	0.103042	2
PMI_024827		XP_022093374.1 39S ribosomal protein L18, mitochondrial-like [Acanthaster planci] (id=77.61%; len=134; e=2.04E-76)			3.815	0.628	0.19497	2	1	0	0	3	2	1	0	2	2	1	1	0.651989	0.954447	0.776752	0.787365	0.727105	0.821758	1.4639	38792.5	55239.6	45877.7	46381.7	42373.6	47349.6	0.72491	0.103103	3
PMI_017812,PMI_016790		XP_022088499.1 40S ribosomal protein S7-like isoform X2 [Acanthaster planci] (id=93.88%; len=196; e=1.99E-130) ,XP_022088499.1 40S ribosomal protein S7-like isoform X2 [Acanthaster planci] (id=93.96%; len=182; e=3.49E-118)	2661	14	5.486	0.5918	0.015425	30	11	0	11	52	13	0	12	49	12	0	12	0.961098	0.936964	0.978652	0.954515	0.922637	0.965131	1.06071	3.19752e+07	3.11367e+07	3.24882e+07	3.16977e+07	3.0641e+07	3.20907e+07	0.724892	0.103116	3
m.12022	Pmi_576130_R	RBP1A_XENLA_RalA-binding_protein_1-A			3.378	0.4236	0.248314	3	2	1	1	4	4	1	3	4	3	1	2	0.91956	0.932856	0.943153	0.936491	0.91024	0.950418	1.04414	282822	285324	289317	287532	278305	291074	0.724874	0.103129	3
m.14553	Pmi_595670_K	KAD3_BOVIN_GTP_AMP_phosphotransferase,_mitochondrial			3.965	0.5723	0.080103	5	4	3	0	10	5	4	1	7	5	4	0	0.859685	1	0.892436	0.881501	0.872714	0.91518	1.16322	1.19908e+06	1.3963e+06	1.24701e+06	1.22967e+06	1.2188e+06	1.27871e+06	0.72483	0.10316	3
m.15308	20732	XP_022083371.1 elongator complex protein 6-like [Acanthaster planci] (id=79.78%; len=267; e=4.71E-155)			3.307	0.5205	0.563868	1	1	0	0	3	3	1	2	1	1	0	0	0.893746	0.798489	0.973547	0.806868	0.740905	0.926351	1.314	100998	87475.1	110152	89178.6	81142.1	103797	0.72472	0.103238	3
PMI_001315		XP_022111754.1 fibropellin-1-like, partial [Acanthaster planci] (id=64.32%; len=213; e=2.18E-80)			2.703	0.2941	0.661434	1	1	1	0	1	1	1	0	1	1	1	0	0.654443	0.741822	0.789285	1	0.630727	0.738676	1.58547	391997	444379	469305	595812	376926	442179	0.724651	0.103287	3
m.15137	Pmi_599820_P	PK3CB_MOUSE_Phosphatidylinositol_4,5-bisphosphate_3-kinase..CUT			3.446	0.4861	0.060012	1	1	0	0	2	2	0	1	2	2	0	0	0.684787	0.719201	0.699839	0.641364	0.690744	0.955137	1.48923	45870.2	48571.2	47248.9	43262.7	46561.5	61812.6	0.724254	0.103571	3
PMI_022065		XP_022107965.1 uncharacterized protein LOC110988589 [Acanthaster planci] (id=52.74%; len=419; e=1.29E-118)			5.514	0.7165	0.042606	11	10	0	0	18	14	2	0	17	14	2	0	0.937631	0.957632	0.912545	0.903135	0.946442	0.992549	1.099	1.42791e+06	1.456e+06	1.39122e+06	1.37692e+06	1.43944e+06	1.51011e+06	0.723862	0.10385	3
m.17955	Pmi_617032_N	NPC2_HUMAN_Epididymal_secretory_protein_E1			5.255	0.6532	0.013904	9	4	4	0	23	6	6	0	25	6	6	0	0.846745	0.962445	0.912356	0.934665	0.973142	0.998017	1.17865	4.41789e+06	5.02496e+06	4.76907e+06	4.89337e+06	5.08509e+06	5.21736e+06	0.723819	0.103881	3
m.48401	72379	XP_022089744.1 thiopurine S-methyltransferase-like [Acanthaster planci] (id=74.88%; len=203; e=1.84E-115)			6.988	0.666	0.040507	6	6	0	6	9	6	0	5	13	8	0	7	0.875162	0.942162	0.962038	0.896743	0.898019	0.963551	1.101	1.68742e+06	1.82344e+06	1.86005e+06	1.73514e+06	1.73917e+06	1.86691e+06	0.723568	0.10406	3
m.38157	57691	XP_022101836.1 uncharacterized protein LOC110985245 isoform X3 [Acanthaster planci] (id=52.34%; len=128; e=1.21E-41)			5.153	0.6868	0.022198	15	5	5	0	11	4	4	0	15	5	5	0	0.919656	0.987222	0.917924	0.891794	0.969366	0.943153	1.10701	3.5439e+06	3.80686e+06	3.53988e+06	3.43782e+06	3.73429e+06	3.63461e+06	0.723364	0.104206	3
m.19967	Pmi_627331_R	RL36A_RAT_60S_ribosomal_protein_L36a			3.48	0.4779	0.065392	14	6	1	4	11	5	1	3	11	4	1	2	0.91015	0.945705	0.89739	0.872964	0.876444	0.906233	1.08333	4.64135e+06	4.75368e+06	4.56587e+06	4.45037e+06	4.43566e+06	4.5904e+06	0.723242	0.104294	3
m.53070	79143	XP_022102438.1 retinoid-inducible serine carboxypeptidase-like [Acanthaster planci] (id=80.58%; len=206; e=3.02E-120)			3.905	0.5729	0.036039	6	5	1	2	2	2	1	0	5	4	1	1	0.889075	0.859183	0.936836	0.867659	0.994335	0.879776	1.1573	403693	389878	425061	393766	451208	398905	0.723124	0.104378	3
PMI_010796		XP_022083333.1 ras-related protein Ral-A-like isoform X3 [Acanthaster planci] (id=93.17%; len=205; e=2.69E-136)			5.054	0.5414	0.064963	5	3	0	3	12	8	0	7	12	8	0	8	0.946959	0.948704	0.931488	0.95174	0.951684	0.953918	1.02408	1.00582e+06	1.00709e+06	989729	1.01031e+06	1.01121e+06	1.01308e+06	0.723076	0.104412	3
m.17927,m.11405	Pmi_616970_A,16694	AIP_RAT_AH_receptor-interacting_protein,XP_022093310.1 AH receptor-interacting protein-like [Acanthaster planci] (id=87.58%; len=306; e=0.00E+00)	673	9	4.327	0.4724	0.0376	9	5	0	4	7	5	0	0	10	6	0	0	0.897983	0.961141	0.962398	0.911875	0.936683	0.959717	1.07173	2.26278e+06	2.42068e+06	2.42357e+06	2.29809e+06	2.35856e+06	2.41547e+06	0.722951	0.104502	3
m.16413	Pmi_608070_M	MOES_BOVIN_Moesin			5.019	0.6722	0.012834	89	43	0	35	153	67	0	56	153	69	0	55	0.945255	0.988654	0.931568	0.925287	0.993009	0.980978	1.07319	3.47715e+07	3.6373e+07	3.42655e+07	3.40374e+07	3.65374e+07	3.60853e+07	0.722867	0.104562	3
PMI_021174		XP_026683685.1 dolichyl-diphosphooligosaccharide--protein glycosyltransferase subunit STT3A [Diaphorina citri] (id=58.25%; len=388; e=3.05E-134)			6.343	0.544	0.004045	12	11	1	0	21	13	1	0	23	14	1	8	0.928602	0.897188	0.879494	1	0.982653	0.948745	1.13702	3.00548e+06	2.89941e+06	2.83609e+06	3.2321e+06	3.17918e+06	3.06693e+06	0.722774	0.104628	3
m.49784	74528	XP_022097943.1 putative E3 ubiquitin-protein ligase UBR7 [Acanthaster planci] (id=72.67%; len=494; e=0.00E+00)			4.371	0.572	0.019026	8	5	2	3	12	9	2	6	17	11	3	8	0.909348	0.930806	0.948564	0.906559	0.964874	0.961765	1.06432	660600	674940	688512	658389	698841	695900	0.722757	0.10464	3
m.32262	Pmi_1145980_	no_annot			2.206	0.2283	1.38456					1	1	1	0	1	1	1	0	0.820753	0.992629	0.894035	0.921797	0.966198	0.998332	1.21636	227138	274436	247171	254927	267074	276037	0.722739	0.104653	2
PMI_000382,m.21613	None,Pmi_635320_W	XP_022084520.1 WW domain-binding protein 4-like [Acanthaster planci] (id=74.94%; len=387; e=2.26E-165) ,WBP4_CHICK_WW_domain-binding_protein_4	1974	2	2.55	0.3925	0.154446					1	1	0	0	3	2	0	0	0.770231	0.952801	0.897506	0.772308	0.933578	0.986158	1.28034	209195	259483	243338	209766	251646	267782	0.72255	0.104789	2
m.56834,m.20714,m.56828	85002,Pmi_631210_I,84994	XP_022091539.1 translation initiation factor IF-3, mitochondrial-like [Acanthaster planci] (id=66.12%; len=369; e=1.75E-157) ,IF3M_MOUSE_Translation_initiation_factor_IF-3,_mitochondrial,XP_022091539.1 translation initiation factor IF-3, mitochondrial-like [Acanthaster planci] (id=67.21%; len=369; e=1.43E-160)	308	7	4.112	0.4897	0.270749	4	4	0	4	6	6	0	6	8	6	0	6	0.891003	0.960539	0.949609	0.991184	0.940273	0.994944	1.11666	510027	549425	543582	567199	538129	569479	0.722338	0.104941	3
PMI_023182		AAT06236.1 triosephosphate isomerase, partial [Patiria miniata] (id=70.00%; len=100; e=2.17E-34)			4.684	0.6258	0.003796	6	3	2	0	14	5	3	0	16	5	3	0	0.982797	0.916796	0.991439	0.978992	0.92741	0.952665	1.08142	1.82157e+06	1.69912e+06	1.83746e+06	1.81455e+06	1.71897e+06	1.76575e+06	0.72231	0.104961	3
m.31476,m.38022,m.38020	Pmi_669490_C,57510,57509	CCD39_XENTR_Coiled-coil_domain-containing_protein_39,XP_022106296.1 influenza virus NS1A-binding protein homolog isoform X1 [Acanthaster planci] (id=83.13%; len=670; e=0.00E+00) ,XP_022106297.1 influenza virus NS1A-binding protein homolog isoform X2 [Acanthaster planci] (id=84.48%; len=638; e=0.00E+00)	1801	18	4.432	0.6599	0.011913	10	10	0	6	12	11	0	4	15	12	0	5	0.88815	0.931477	0.963696	0.988753	0.915949	0.968816	1.11327	1.10195e+06	1.15555e+06	1.19631e+06	1.22628e+06	1.1358e+06	1.20131e+06	0.722287	0.104978	3
m.20912	Pmi_632120_T	TCPG_BOVIN_T-complex_protein_1_subunit_gamma			5.467	0.6898	0.00207	74	43	0	34	135	55	0	39	116	50	0	35	0.961247	0.984248	0.93038	0.91733	0.999322	0.978262	1.08938	3.67612e+07	3.76441e+07	3.55984e+07	3.5084e+07	3.82246e+07	3.74141e+07	0.722027	0.105164	3
m.25749	Pmi_651573_X	XRCC1_MOUSE_DNA_repair_protein_XRCC1			2.921	0.3793	0.093396	2	2	0	1					2	2	0	2	0.936488	0.396465	0.22691	0.765261	0.879074	0.927504	4.12713	48659.5	22880.5	11881.5	43874	43919	49062.6	0.722017	0.105171	2
PMI_016275,m.30402	None,Pmi_666570_F	XP_022083636.1 FAD synthase-like [Acanthaster planci] (id=86.89%; len=328; e=0.00E+00) ,FLAD1_XENLA_FAD_synthase	2588	5	3.277	0.4226	0.026561	2	2	0	0	2	2	0	2	2	2	0	0	0.858479	0.858059	0.880669	0.975068	0.805255	0.84944	1.21088	83871.5	81794	84818.5	96575.2	80441	83149.7	0.72178	0.105342	3
PMI_021058		XP_022086314.1 huntingtin-interacting protein K-like [Acanthaster planci] (id=88.14%; len=118; e=1.07E-66)			4.853	0.5913	0.002445	5	3	3	0	8	4	4	0	5	4	4	0	0.88849	0.889641	0.858775	0.884017	0.865517	0.912481	1.06254	383481	385662	370471	383960	376977	400203	0.721582	0.105484	3
m.23217,m.22429	32621,Pmi_638840_C	XP_780196.1 PREDICTED: COP9 signalosome complex subunit 2 [Strongylocentrotus purpuratus] (id=92.12%; len=444; e=0.00E+00) ,CSN2_DANRE_COP9_signalosome_complex_subunit_2	416	11	4.746	0.5409	0.01549	8	7	0	7	10	7	0	6	11	9	0	7	0.941154	0.946218	0.966279	0.990144	0.936061	0.966163	1.05778	1.57107e+06	1.57949e+06	1.6132e+06	1.65228e+06	1.56268e+06	1.61296e+06	0.721527	0.105524	3
PMI_008243		XP_022104570.1 adenylyl cyclase-associated protein 1-like [Acanthaster planci] (id=80.16%; len=388; e=0.00E+00)			6.174	0.6599	0.001209	64	32	0	11	84	43	0	0	95	40	0	13	0.981183	0.981584	0.941739	0.942679	0.993458	0.989953	1.05492	3.07483e+07	3.07616e+07	2.95068e+07	2.95425e+07	3.11377e+07	3.10221e+07	0.721397	0.105617	3
PMI_013467,PMI_017268		XP_022080897.1 tRNA pseudouridine synthase A, mitochondrial-like isoform X2 [Acanthaster planci] (id=69.46%; len=596; e=0.00E+00) ,XP_022080897.1 tRNA pseudouridine synthase A, mitochondrial-like isoform X2 [Acanthaster planci] (id=70.42%; len=355; e=2.17E-164)	2335	5	3.848	0.4823	0.040268	1	1	0	0	4	4	0	3	2	2	0	0	0.760622	0.856824	0.921955	0.993171	0.839432	0.89695	1.30574	237982	272452	299728	328513	269840	293294	0.721335	0.105662	3
m.22344	Pmi_638460_V	VPP1_MOUSE_V-type_proton_ATPase_116_kDa_subunit_a_isoform_1			5.163	0.589	0.059778	5	3	0	3	10	9	0	5	10	9	0	9	0.764026	0.839746	0.981988	0.911343	0.770893	0.849984	1.28528	482821	527801	626425	575209	483023	537714	0.721212	0.10575	3
m.24469,m.11211	Pmi_646905_P,16497	PSME3_PIG_Proteasome_activator_complex_subunit_3,XP_022080051.1 proteasome activator complex subunit 3-like [Acanthaster planci] (id=94.36%; len=248; e=2.40E-169)	1107	12	4.499	0.6115	0.022452	13	8	0	3	20	11	0	2	18	12	0	2	0.926846	0.946195	0.95294	0.969843	0.939463	0.934552	1.04639	1.88907e+06	1.91735e+06	1.94119e+06	1.97507e+06	1.90848e+06	1.89751e+06	0.721007	0.105897	3
m.28430,PMI_019620,PMI_026261	41872,None,None	XP_022085247.1 peptidyl-prolyl cis-trans isomerase-like 3 isoform X2 [Acanthaster planci] (id=91.46%; len=164; e=2.85E-109) ,XP_022085246.1 S-adenosylmethionine mitochondrial carrier protein-like isoform X1 [Acanthaster planci] (id=82.79%; len=244; e=3.19E-140) ,XP_022085247.1 peptidyl-prolyl cis-trans isomerase-like 3 isoform X2 [Acanthaster planci] (id=90.85%; len=164; e=5.67E-109)	1698	6	3.138	0.4042	0.098479	2	2	0	0	5	4	0	0	5	4	0	0	0.89456	0.937242	0.964194	0.939122	0.893918	0.943737	1.07862	622316	648729	664773	648947	617810	655080	0.720905	0.105971	3
m.13447	Pmi_587573_S	SORCN_HUMAN_Sorcin			4.698	0.6592	0.003472	7	6	2	4	17	8	3	5	22	13	6	7	1	0.801765	0.929927	0.876791	0.872362	0.759625	1.31644	3.14372e+06	2.52166e+06	2.92302e+06	2.76364e+06	2.74818e+06	2.39254e+06	0.720753	0.106081	3
m.53563	79747	XP_022082192.1 protein arginine N-methyltransferase 5-like [Acanthaster planci] (id=93.57%; len=638; e=0.00E+00)			6.295	0.6953	0.036679	23	18	0	16	35	24	0	22	29	23	0	22	0.95383	0.954688	0.974279	0.92806	0.972555	0.997526	1.07485	5.05941e+06	5.06437e+06	5.16815e+06	4.9215e+06	5.1585e+06	5.29078e+06	0.720003	0.106622	3
m.24530,m.16066	35081,Pmi_606010_M	XP_022104590.1 uncharacterized protein LOC110986739 [Acanthaster planci] (id=57.69%; len=364; e=4.36E-127) ,MASU1_MOUSE_Mitochondrial_assembly_of_ribosomal_large_sub..CUT	1013	3	3.432	0.4988	0.067469	1	1	0	0	3	3	0	2	2	2	0	0	0.736605	0.709798	0.772887	0.890339	0.80016	0.847592	1.25435	304832	291216	317579	366780	317259	341235	0.720001	0.106624	3
PMI_000329		XP_011667440.1 PREDICTED: LOW QUALITY PROTEIN: tubulin alpha-1 chain-like [Strongylocentrotus purpuratus] (id=98.23%; len=451; e=0.00E+00)			5.676	0.7383	0.00166	101	20	0	14	161	27	0	19	165	27	0	18	0.956638	0.876777	0.981966	0.973438	0.9176	0.922792	1.11997	1.01605e+08	9.2872e+07	1.04362e+08	1.03204e+08	9.72982e+07	9.78573e+07	0.719733	0.106817	3
PMI_002120		XP_022104608.1 probable E3 ubiquitin-protein ligase HECTD4 isoform X2 [Acanthaster planci] (id=71.37%; len=227; e=1.08E-99)			2.856	0.3634	0.294517	1	1	1	0	1	1	1	0	1	1	0	0	0.8874	0.816872	0.875574	0.697867	0.892549	0.845405	1.27897	20859.3	18387.3	20044.7	14559.2	20877.2	19279.8	0.71963	0.106891	3
PMI_021188		XP_022108692.1 cystatin-1-like [Acanthaster planci] (id=59.43%; len=106; e=1.96E-34)			5.025	0.5234	0.262973	3	1	0	0	1	1	0	0	3	3	1	2	0.914206	1	0.847787	0.832029	0.822026	0.829152	1.21651	155501	169920	143949	141771	139524	141289	0.71947	0.107007	3
m.21486	Pmi_634644_C	CNTN3_RAT_Contactin-3			4.917	0.5893	0.002032	8	5	0	4	11	7	0	5	10	7	0	7	0.864176	0.919159	0.913035	0.946843	0.914492	0.972416	1.12525	711768	756373	752486	778438	752406	800099	0.719411	0.10705	3
m.4340,PMI_015598	Pmi_459431_H,None	HSP74_PARLI_Heat_shock_70_kDa_protein_IV,XP_022100816.1 heat shock 70 kDa protein IV-like [Acanthaster planci] (id=92.50%; len=640; e=0.00E+00)	2357	3	4.921	0.6543	0.027597	17	4	0	3	19	5	0	4	24	6	0	5	0.826716	0.982066	0.816253	0.783467	0.946504	0.885246	1.25349	7.10855e+06	8.41677e+06	7.06784e+06	6.71424e+06	8.06782e+06	7.61015e+06	0.719406	0.107054	3
m.53841	80253	XP_022106364.1 uncharacterized protein LOC110987698 isoform X1 [Acanthaster planci] (id=46.15%; len=169; e=1.70E-34)			3.716	0.5718	0.2138	4	2	2	0	8	4	4	0	7	4	4	0	0.968503	0.972041	0.94011	0.953549	0.9924	0.894701	1.1092	1.04459e+06	1.04839e+06	1.01342e+06	1.02878e+06	1.07101e+06	964727	0.718154	0.107961	3
m.38049	57562	XP_022098742.1 serpin B6-like isoform X3 [Acanthaster planci] (id=83.77%; len=191; e=7.13E-110)			4.248	0.5358	0.092702	7	4	0	0	11	8	0	0	9	6	0	0	0.915307	0.959528	0.896132	0.922937	0.929496	1	1.11591	2.06327e+06	2.16802e+06	2.02232e+06	2.08217e+06	2.09598e+06	2.25886e+06	0.717707	0.108286	3
PMI_027361		XP_022109279.1 prohibitin-2-like [Acanthaster planci] (id=95.13%; len=226; e=7.81E-157)			5.114	0.6271	0.039652	27	13	1	0	38	16	1	0	41	17	1	0	0.986394	0.898278	0.984728	0.937247	0.937461	0.956679	1.09809	1.29827e+07	1.18174e+07	1.2964e+07	1.23255e+07	1.23393e+07	1.25917e+07	0.717243	0.108624	3
PMI_029907		XP_028412342.1 uncharacterized protein LOC114535155 [Dendronephthya gigantea] (id=58.07%; len=415; e=2.70E-168)			3.296	0.5962	0.323702	2	2	0	0	3	2	1	1	2	2	1	1	0.800386	0.960956	0.821519	0.72842	0.998239	0.882458	1.37042	298838	356602	303369	273371	369311	327659	0.717218	0.108642	3
m.33320	Pmi_4948140_	no_annot			1.872	0.2406	0.40402	1	1	1	0	1	1	1	0	1	1	1	0	0.761157	0.951115	0.755619	0.692395	0.815582	0.945189	1.37366	173085	216289	171205	158234	183482	213628	0.717096	0.108731	3
m.3623	Pmi_432820_P	PGLT1_MOUSE_Protein_O-glucosyltransferase_1			3.437	0.4888	0.054433	5	4	4	0	6	5	5	0	5	5	5	0	0.94584	0.92859	0.909923	0.989139	0.867549	0.931462	1.14015	915932	898783	881813	958405	840283	901155	0.717069	0.108751	3
PMI_012377		XP_022099443.1 GDH/6PGL endoplasmic bifunctional protein-like [Acanthaster planci] (id=82.60%; len=569; e=0.00E+00)			2.942	0.3294	0.072583	1	1	0	0	2	2	0	1					0.930692	0.75393	1	0.636655	0.917182	0.87263	1.57071	34712	26105.7	37878.7	21576.8	34595.7	31520.3	0.716965	0.108827	2
m.43545	65440	XP_022101945.1 sodium- and chloride-dependent GABA transporter ine-like [Acanthaster planci] (id=81.61%; len=560; e=0.00E+00)			3.128	0.5121	0.100069	2	2	0	1	4	4	0	4	3	3	0	3	0.811544	0.928302	0.858294	0.848463	0.99645	0.949559	1.22784	654336	747226	694831	682096	803515	764910	0.7169	0.108874	3
m.27659	40367	XP_022102349.1 uncharacterized protein LOC110985559 [Acanthaster planci] (id=87.16%; len=257; e=5.30E-170)			5.123	0.6667	0.028577	32	18	0	16	47	21	0	15	47	23	0	18	0.92103	0.9669	0.913942	0.93165	0.986122	0.988712	1.08181	1.18791e+07	1.24796e+07	1.17905e+07	1.20254e+07	1.27213e+07	1.27603e+07	0.716859	0.108903	3
PMI_011063		XP_022081138.1 uncharacterized protein LOC110974087 isoform X1 [Acanthaster planci] (id=68.45%; len=1008; e=0.00E+00)			5.293	0.7074	0.00718	90	26	1	8	128	32	1	3	144	34	2	2	0.946397	0.996671	0.964017	0.943736	0.982625	0.981119	1.05609	5.25848e+07	5.53779e+07	5.35639e+07	5.24365e+07	5.45981e+07	5.45152e+07	0.716502	0.109164	3
m.15124	Pmi_599770_C	CSN1_XENLA_COP9_signalosome_complex_subunit_1			3.832	0.5939	0.174246	3	3	0	2	8	7	1	6	6	6	0	4	0.915441	0.936082	0.94062	0.945337	0.92054	0.916806	1.03266	649379	659563	667249	670127	645358	644546	0.716269	0.109334	3
m.10435	Pmi_560050_R	RT06_BOVIN_28S_ribosomal_protein_S6,_mitochondrial			3.747	0.3821	0.440951	1	1	1	0	2	2	2	0	2	2	2	0	0.783695	0.925801	0.884226	0.983208	0.925499	0.897779	1.25458	352031	416486	398813	444197	416719	402938	0.71625	0.109348	3
m.19921	Pmi_627250_M	MK14_XENLA_Mitogen-activated_protein_kinase_14			4.125	0.6604	0.006883	8	7	2	5	17	13	2	1	14	10	1	9	0.904348	0.983906	0.905126	0.87275	0.933402	0.991499	1.13606	2.14085e+06	2.32868e+06	2.14296e+06	2.06565e+06	2.20902e+06	2.34616e+06	0.716106	0.109453	3
m.49840	74623	ANN83871.1 beta-tubulin [Patiria miniata] (id=97.86%; len=373; e=0.00E+00)			6.033	0.6494	0.003897					190	25	0	2	190	27	0	2	0.985223	0.987813	0.961978	0.953683	1	0.957494	1.04857	7.46427e+07	7.48322e+07	7.28737e+07	7.22508e+07	7.57585e+07	7.25319e+07	0.716059	0.109487	2
m.13907	Pmi_591120_C	CPNE3_MOUSE_Copine-3			2.825	0.4638	0.179431	5	4	0	4	6	5	0	5	6	6	1	5	0.815474	0.908343	0.836109	0.877197	0.825877	0.932707	1.14376	506384	568109	522923	564855	520838	593149	0.715817	0.109665	3
m.44706	67068	XP_022109039.1 caldesmon-like isoform X4 [Acanthaster planci] (id=42.28%; len=324; e=1.10E-32)			4.165	0.5695	0.002091	6	6	1	5	10	7	0	7	9	7	0	7	0.875342	0.900466	0.919755	0.935637	0.894681	0.92172	1.06888	332952	345872	353485	358301	341273	353872	0.715612	0.109815	3
m.16340,m.22125	Pmi_607600_C,30723	CC104_XENTR_Coiled-coil_domain-containing_protein_104,XP_022110008.1 cilia- and flagella-associated protein 36-like isoform X2 [Acanthaster planci] (id=80.30%; len=406; e=0.00E+00)	378	26	5.118	0.6284	0.028373	32	21	0	20	33	25	0	19	33	24	0	18	0.930134	0.979008	0.979033	0.953386	0.969747	0.9939	1.06856	6.13545e+06	6.46346e+06	6.46098e+06	6.29028e+06	6.40102e+06	6.56524e+06	0.715251	0.110079	3
m.16104	Pmi_606300_C	CSKP_MOUSE_Peripheral_plasma_membrane_protein_CASK			3.874	0.5543	0.343654	3	3	1	2	4	4	2	2	5	5	1	4	0.882429	0.905953	0.757842	0.842242	0.895023	0.971517	1.28195	470061	481898	404659	448480	474097	519353	0.715242	0.110086	3
PMI_027366		XP_022104676.1 sorbitol dehydrogenase-like isoform X1 [Acanthaster planci] (id=90.91%; len=253; e=1.95E-157)			5.74	0.6737	0.039441					17	7	1	0	17	9	1	0	0.957492	0.927085	0.923575	1	0.951777	0.952805	1.08275	1.88543e+06	1.82579e+06	1.81862e+06	1.96922e+06	1.87407e+06	1.87615e+06	0.714853	0.110371	2
PMI_020483		XP_022094048.1 ubiquitin-conjugating enzyme E2 T-like [Acanthaster planci] (id=53.28%; len=259; e=3.86E-53)			5.122	0.6308	0.54235	2	2	1	0					1	1	1	0	0.924504	1	0.919068	0.903466	0.828094	0.843275	1.20759	109048	117997	108482	106903	97766.7	99540.1	0.714844	0.110377	2
PMI_015904,PMI_025640,m.10624	None,None,Pmi_562080_C	XP_022091970.1 UPF0598 protein C8orf82-like [Acanthaster planci] (id=86.10%; len=223; e=2.88E-142) ,XP_022091970.1 UPF0598 protein C8orf82-like [Acanthaster planci] (id=87.44%; len=223; e=4.82E-146) ,CH082_HUMAN_UPF0598_protein_C8orf82	1042	3	3.319	0.295	0.266887	1	1	0	0	2	2	0	1	2	2	0	1	0.813651	0.905765	0.857129	0.957681	0.84763	0.853408	1.17702	228405	253815	244355	281743	243082	239458	0.714525	0.110612	3
PMI_021282,PMI_021283,PMI_005844,PMI_026630		XP_022111632.1 probable serine/threonine-protein kinase roco8 [Acanthaster planci] (id=62.99%; len=354; e=5.44E-142) ,XP_022111632.1 probable serine/threonine-protein kinase roco8 [Acanthaster planci] (id=62.72%; len=346; e=1.44E-139) ,XP_022111632.1 probable serine/threonine-protein kinase roco8 [Acanthaster planci] (id=62.11%; len=512; e=0.00E+00) ,XP_022107279.1 probable serine/threonine-prote…	1482	1	3.74	0.4158	1.10154	1	1	0	0					1	1	0	0	0.735318	0.842162	0.750395	0.868804	1	0.807845	1.35996	49417.1	56601.1	50405.5	58370.1	67199.1	54299.5	0.714095	0.110927	2
m.23471	Pmi_643090_X	XPP1_HUMAN_Xaa-Pro_aminopeptidase_1			3.952	0.5631	0.144757	3	2	0	2	3	3	0	3	4	4	0	4	0.882042	0.904042	0.871341	0.848962	0.99135	0.893299	1.16772	239487	247580	236333	230132	268768	238965	0.714059	0.110954	3
m.28064	Pmi_659242_P	PU60B_DANRE_Poly(U)-binding-splicing_factor_PUF60-B			5.169	0.5784	0.124767	6	6	0	6	12	9	0	9	11	8	0	8	0.913281	0.955128	0.937533	0.954792	0.937352	0.967625	1.0595	770907	807143	790196	806337	790722	816565	0.713911	0.111063	3
m.6971	Pmi_513910_T	TRNK1_MOUSE_TPR_and_ankyrin_repeat-containing_protein_1			3.208	0.4415	0.042596					2	1	1	0	1	1	1	0	0.814164	0.900538	0.998756	0.750583	0.89175	0.866824	1.33064	90913.1	99942.9	111890	83173.1	99573.8	96693.1	0.713311	0.111505	2
m.5562	9286	XP_022107992.1 C2 domain-containing protein 5-like [Acanthaster planci] (id=98.09%; len=105; e=1.44E-63)			2.718	0.3675	0.350115					1	1	1	0	1	1	1	0	0.588246	1	0.611645	0.514402	0.508591	0.559971	1.96622	35896	61197	37486.6	31463.5	31089.2	34306.3	0.713249	0.11155	2
m.10709	Pmi_563190_T	TMEDA_BOVIN_Transmembrane_emp24_domain-containing_protein_10			4.938	0.5578	0.005411	13	11	1	10	16	12	1	11	17	12	1	11	0.959407	0.951481	0.92953	0.932767	0.963451	0.823196	1.17038	6.30472e+06	6.28035e+06	6.09503e+06	6.13493e+06	6.33607e+06	5.41467e+06	0.713114	0.11165	3
PMI_020327,PMI_028756		XP_022094004.1 U6 snRNA-associated Sm-like protein LSm5 [Acanthaster planci] (id=78.26%; len=92; e=2.96E-41) ,XP_012032237.1 U6 snRNA-associated Sm-like protein LSm5 isoform X2 [Ovis aries] (id=74.29%; len=70; e=8.48E-25)	233	1	2.543	0.259	1.44846	1	1	0	0	3	2	0	0	1	1	0	0	0.851138	0.902192	0.856918	0.83993	0.883451	0.927982	1.10483	544140	564881	551425	544506	564795	589365	0.712932	0.111784	3
PMI_016095		XP_022085352.1 major facilitator superfamily domain-containing protein 6-like [Acanthaster planci] (id=68.31%; len=628; e=0.00E+00)			3.73	0.4445	0.019283	1	1	0	0	3	3	1	0	2	2	1	1	0.851133	0.908073	0.892939	0.913992	0.815511	0.93578	1.14748	133625	146505	139602	148130	124234	151334	0.712921	0.111792	3
m.19328	Pmi_624381_A	ASPD_XENTR_Putative_L-aspartate_dehydrogenase			4.259	0.5283	0.019932	7	5	1	4	7	5	2	3	12	9	2	7	0.894621	0.939742	0.917417	0.903564	0.976074	0.982144	1.09783	1.3817e+06	1.45168e+06	1.41586e+06	1.39531e+06	1.50694e+06	1.51636e+06	0.712795	0.111885	3
PMI_001763		XP_022083146.1 cysteine-rich motor neuron 1 protein-like isoform X1 [Acanthaster planci] (id=79.23%; len=915; e=0.00E+00)			3.285	0.3583	0.382438	2	2	0	0	1	1	0	0	1	1	0	0	0.914237	0.708183	0.689489	0.68515	0.807245	0.705261	1.33436	23251.5	18346.2	18087	17923	21026.9	18493.9	0.712787	0.111891	3
m.10735	Pmi_563700_n	no_annot			3.035	0.6335	0.160458	2	2	2	0	1	1	1	0	2	2	2	0	0.619307	0.696394	0.654334	0.764231	0.885838	0.694996	1.43037	37895.1	38723.9	40183.2	48719.7	51412.6	40459.8	0.712554	0.112063	3
m.32929,m.11936	49189,Pmi_575000_R	XP_022100359.1 60S ribosomal protein L9-like [Acanthaster planci] (id=85.03%; len=187; e=4.08E-118) ,RL9_ICTPU_60S_ribosomal_protein_L9	1298	8	5.62	0.6331	0.002932	20	8	0	6	30	9	0	7	32	9	0	7	0.985283	0.846524	0.95173	0.952647	0.85393	0.844932	1.16611	2.29824e+07	1.97385e+07	2.21879e+07	2.2203e+07	1.99188e+07	1.96517e+07	0.712538	0.112075	3
m.15402,m.30778	Pmi_601650_T,45904	TIA1_MOUSE_Nucleolysin_TIA-1,XP_022080639.1 nucleolysin TIA-1-like isoform X2 [Acanthaster planci] (id=83.41%; len=440; e=0.00E+00)	1401	9	6.528	0.6592	0.06873	6	4	0	4	14	9	0	8	10	8	0	8	0.871121	0.937321	0.921332	0.937958	0.959132	0.967686	1.11085	1.24408e+06	1.34041e+06	1.31582e+06	1.34027e+06	1.37173e+06	1.38284e+06	0.712536	0.112076	3
m.36158	54414	XP_022098505.1 uncharacterized protein LOC110983508 [Acanthaster planci] (id=66.44%; len=149; e=8.57E-63)			6.654	0.6977	0.039727	33	8	1	3	32	8	1	3	40	8	1	3	0.963249	0.980715	0.926296	0.913058	0.978416	0.969203	1.0741	1.74723e+07	1.77877e+07	1.68129e+07	1.65578e+07	1.77642e+07	1.75948e+07	0.712406	0.112172	3
PMI_025612		XP_022097585.1 uncharacterized protein LOC110983032 [Acanthaster planci] (id=52.65%; len=756; e=0.00E+00)			3.16	0.2322	0.098133	3	3	0	2	2	2	0	1					0.777279	0.865865	0.841674	0.929828	0.915002	1	1.28654	732491	817883	793453	878888	866071	943566	0.712275	0.112269	2
m.41226,m.21701,m.41237	62396,Pmi_635630_P,62406	XP_022086621.1 peroxiredoxin-2-like isoform X1 [Acanthaster planci] (id=83.27%; len=257; e=2.03E-152) ,PRDX3_RAT_Thioredoxin-dependent_peroxide_reductase,_mito..CUT,XP_022086621.1 peroxiredoxin-2-like isoform X1 [Acanthaster planci] (id=81.71%; len=257; e=3.42E-151)	467	7	5.406	0.6559	0.054427	7	3	0	1	12	7	0	2	15	8	0	1	0.909804	0.933135	0.994345	0.939123	0.928564	0.963205	1.09292	1.61846e+06	1.65953e+06	1.7751e+06	1.67413e+06	1.64809e+06	1.7171e+06	0.712231	0.112301	3
PMI_015921		XP_791401.1 PREDICTED: histone H3.3 [Strongylocentrotus purpuratus] (id=100.00%; len=136; e=1.49E-92)			3.292	0.3791	0.010223					19	7	0	7	20	6	0	6	1	0.966544	0.913497	0.903006	0.966502	0.978106	1.10741	2.16161e+07	2.09331e+07	1.9738e+07	1.95029e+07	2.09307e+07	2.11528e+07	0.711908	0.11254	2
[truncated: 6,871 more rows]

## Sheet: regulated proteins
name	accession	description	group_id	group_um	xcorr_max	dcn_max	ppm_min	tp[1]	up[1]	um[1]	rp[1]	tp[2]	up[2]	um[2]	rp[2]	tp[3]	up[3]	um[3]	rp[3]	average norm TMT intensity prophase1	average norm TMT intensity GVBD	average norm TMT intensity M1	average norm TMT intensity M2	average norm TMT intensity 2pn	average norm TMT intensity FC	max. protein abundance fold-change	average TMT intensity prophase1	average TMT intensity GVBD	average TMT intensity M1	average TMT intensity M2	average TMT intensity 2pn	average TMT intensity FC	Pearson correlation coefficient	pvalue
[truncated: 184 more rows]
