# Supplementary material for: Selective dephosphorylation by PP2A-B55 directs the meiosis I-meiosis II transition in oocytes
Source: eLife. 2021 Aug 3;10:e70588. doi: 10.7554/eLife.70588 (PMC8370769; doi:10.7554/eLife.70588)
Supplement: Supplementary file 3. [file elife-70588-supp3.xlsx]

## Sheet: Supp File 3
Column	description
name	protein name
accession	protein accession
description	protein description
group_id	protein group identifier
group_um
xcorr_max	maximum xcorr parameter for protein identification
dcn_max	maximum dcn parameter for protein identification
ppm_min	minimum part per million parameter for protein identification
tp	total peptide count
up	unique peptide count
um	unique match count
rp	razor peptide count
log2 Control M2-1	log2 summed normalized TMT reporter ion intensity for indicated protein in Control M2-1
log2 Control M2-2	log2 summed normalized TMT reporter ion intensity for indicated protein in Control M1-2
log2 Emetine M2-1	log2 summed normalized TMT reporter ion intensity for indicated protein in Emetine M2-1
log2 Emetine M2-2	log2 summed normalized TMT reporter ion intensity for indicated protein in Emetine M2-2
log2 Emetine M2-3	log2 summed normalized TMT reporter ion intensity for indicated protein in Emetine M2-3
log2 Control 2PN-1	log2 summed normalized TMT reporter ion intensity for indicated protein in Control 2PN-1
log2 Control 2PN-2	log2 summed normalized TMT reporter ion intensity for indicated protein in Control 2PN-2
log2 Control 2PN-3	log2 summed normalized TMT reporter ion intensity for indicated protein in Control 2PN-3
log2 Emetine 2PN-1	log2 summed normalized TMT reporter ion intensity for indicated protein in Emetine 2PN-1
log2 Emetine 2PN-2	log2 summed normalized TMT reporter ion intensity for indicated protein in Emetine 2PN-2
log2 Emetine 2PN-3	log2 summed normalized TMT reporter ion intensity for indicated protein in Emetine 2PN-3
log2 ratio Emetine M2- Control M2	log2 ratio Emetine M2- Control M2
log2 ratio Emetine 2PN- Control 2PN	log2 ratio Emetine 2PN- Control 2PN
pvalue Emetine M2 -control M2	pvalue Emetine M2 -control M2
pvalue Emetine 2PN -control 2PN	pvalue Emetine 2PN -control 2PN
regulated?	proteins with significant change in abundance upon emetine treatment

## Sheet: summary
name	accession	description	group_id	group_um	xcorr_max	dcn_max	ppm_min	tp	up	um	rp	log2 Control M2-1	log2 Control M2-2	log2 Emetine M2-1	log2 Emetine M2-2	log2 Emetine M2-3	log2 Control 2PN-1	log2 Control 2PN-2	log2 Control 2PN-3	log2 Emetine 2PN-1	log2 Emetine 2PN-2	log2 Emetine 2PN-3	log2 ratio Emetine M2- Control M2	log2 ratio Emetine 2PN- Control 2PN	pvalue Emetine M2 -control M2	pvalue Emetine 2PN -control 2PN	regulated?
m.27358	Pmi_657060_M	MYS_AEQIR_Myosin_heavy_chain,_striated_muscle			7.717	0.8129	0.025707	184	98	2	88	24.3218	25.0364	24.2741	24.2891	24.3781	26.1034	27.1907	27.3832	24.0757	24.1165	23.8981	-0.365304	-2.86237	0.49204	0.0166642	regulated
PMI_005503		XP_022093558.1 myosin heavy chain, striated muscle-like [Acanthaster planci] (id=80.10%; len=819; e=0.00E+00)			7.717	0.8129	0.237922	123	57	4	0	23.7601	24.4329	23.7288	23.7476	23.8084	25.507	26.6083	26.7907	23.4901	23.5128	23.2747	-0.334867	-2.87611	0.500908	0.0162022	regulated
m.22937	32129	XP_022093558.1 myosin heavy chain, striated muscle-like [Acanthaster planci] (id=84.16%; len=688; e=0.00E+00)			7.717	0.8129	0.237922	106	48	0	0	23.5163	24.1759	23.4801	23.5136	23.5571	25.286	26.3929	26.5606	23.2724	23.2367	22.978	-0.329133	-2.91748	0.500184	0.0145211	regulated
m.32369	48427	XP_022108258.1 tropomyosin-like isoform X3 [Acanthaster planci] (id=84.51%; len=284; e=1.57E-157)			6.622	0.788	0.696697	75	31	7	11	25.0706	25.333	25.1063	25.1103	25.0079	25.6854	26.3368	26.4349	25.0368	25.0653	25.0261	-0.126985	-1.10959	0.505259	0.0418107	regulated
PMI_024647		XP_022086131.1 extracellular matrix protein 3-like [Acanthaster planci] (id=91.51%; len=1673; e=0.00E+00)			6.81	0.7832	0.429169	27	21	0	16	21.5243	22.1136	21.1483	21.3835	21.451	22.6449	23.601	23.6932	21.4015	21.737	21.5697	-0.49135	-1.74358	0.325958	0.0273576	regulated
m.51454; m.31892	76953; Pmi_670463_F	XP_022086131.1 extracellular matrix protein 3-like [Acanthaster planci] (id=92.12%; len=1852; e=0.00E+00) ; FREM2_LYTVA_Extracellular_matrix_protein_3	1911	18	5.162	0.8392	0.462376	25	18	0	12	21.1633	21.7006	20.7234	21.0855	21.1049	22.3487	23.3373	23.4927	21.0316	21.3577	21.1962	-0.460684	-1.86438	0.304103	0.0284301	regulated
PMI_001728		XP_022088423.1 uncharacterized protein LOC110978061 isoform X2 [Acanthaster planci] (id=75.48%; len=1350; e=0.00E+00)			5.97	0.8191	0.498896	24	14	2	4	20.0992	20.23	19.5486	19.6794	19.854	20.5454	21.3747	21.6329	19.7472	19.9958	20.0065	-0.470595	-1.26785	0.0235442	0.0530695	regulated
m.30953; m.51027	Pmi_668080_T; 76445	TRFM_HUMAN_Melanotransferrin; XP_022090494.1 melanotransferrin-like [Acanthaster planci] (id=72.38%; len=735; e=0.00E+00)	2592	12	6.683	0.7822	0.635664	24	12	0	0	23.01	23.1113	22.8371	22.9368	23.0323	23.5432	24.2616	24.3535	22.9979	22.9144	22.6832	-0.125244	-1.1876	0.20217	0.0315095	regulated
m.29507	Pmi_663690_n	no_annot			5.446	0.8085	0.784169	23	9	2	2	20.9233	20.8473	20.0949	20.3148	20.3323	21.4722	22.673	22.8561	20.3323	20.6283	20.6618	-0.637983	-1.79297	0.00645857	0.0471615	regulated
m.38533	58195	XP_022088423.1 uncharacterized protein LOC110978061 isoform X2 [Acanthaster planci] (id=74.06%; len=266; e=6.83E-61)			7.911	0.8063	0.660845	22	8	1	0	21.3689	21.2522	20.5831	20.8323	20.9284	22.0525	23.1246	23.3622	20.9547	21.2123	21.1937	-0.529242	-1.72623	0.022444	0.0453841	regulated
m.28220	Pmi_659801_n	no_annot			5.497	0.8071	0.160847	21	16	3	10	20.4393	20.6858	19.9152	20.2603	20.2323	21.3703	22.3351	22.6103	20.1051	20.5134	20.503	-0.426621	-1.7314	0.100255	0.0324489	regulated
PMI_012155		XP_022088426.1 collagen alpha-1(II) chain-like [Acanthaster planci] (id=51.71%; len=1462; e=0.00E+00)			5.497	0.8071	0.032629	21	16	1	12	20.7614	20.8782	20.2216	20.4866	20.4672	21.5524	22.547	22.7584	20.4451	20.755	20.7679	-0.428011	-1.62986	0.0256244	0.0397951	regulated
PMI_008133; PMI_021672; PMI_008955		CBM82447.1 histone H2B-II protein [Rhabdopleura compacta] (id=82.79%; len=122; e=1.52E-68) ; XP_022088165.1 G-protein coupled receptor 161-like isoform X2 [Acanthaster planci] (id=79.90%; len=398; e=0.00E+00) ; sp|Q7M4G7.2|H2B_PATPE RecName: Full=Histone H2B (id=100.00%; len=122; e=1.21E-82)	1428	2	4.591	0.7819	0.806259	19	5	0	1	24.1267	24.2437	23.9544	23.9561	23.9635	25.5968	25.2386	25.2338	23.8594	23.8387	23.9077	-0.227165	-1.48781	0.159766	0.005376	regulated
PMI_002177		XP_022088424.1 uncharacterized protein LOC110978062 isoform X1 [Acanthaster planci] (id=84.80%; len=1553; e=0.00E+00)			6.801	0.7997	0.544943	18	16	8	7	20.431	20.7586	20.2003	20.307	20.3793	21.3515	22.2864	22.4443	20.4074	20.656	20.538	-0.299255	-1.49362	0.298583	0.0432465	regulated
m.38523	58190	XP_022088423.1 uncharacterized protein LOC110978061 isoform X2 [Acanthaster planci] (id=71.50%; len=200; e=4.98E-37)			7.198	0.8052	0.934134	17	4	0	0	21.0337	20.8854	20.2423	20.4895	20.5823	21.7218	22.8492	23.0764	20.5671	20.8512	20.8196	-0.521508	-1.80315	0.0254729	0.044579	regulated
m.9366	Pmi_547340_A	ANX13_MOUSE_Annexin_A13			6.318	0.7125	0.388099	16	12	2	0	20.4987	20.7528	20.1877	20.0842	20.2622	21.2619	22.0897	22.1641	20.2327	20.1325	20.0013	-0.447747	-1.71643	0.136553	0.0225299	regulated
PMI_002136		XP_022091183.1 twitchin-like isoform X3 [Acanthaster planci] (id=77.72%; len=3864; e=0.00E+00)			4.728	0.7464	1.05708	15	15	0	7	20.2023	20.6297	20.2212	19.9117	20.1659	21.2762	22.2448	22.4213	19.7932	19.8755	19.8107	-0.316382	-2.15426	0.353101	0.0257459	regulated
PMI_006305		XP_022090494.1 melanotransferrin-like [Acanthaster planci] (id=62.69%; len=729; e=0.00E+00)			6.683	0.7822	0.786564	15	8	1	0	22.769	22.8988	22.5835	22.6385	22.7563	23.2611	24.0439	24.1319	22.732	22.6203	22.3765	-0.174515	-1.23606	0.157195	0.0338097	regulated
m.38514	58187	XP_022088423.1 uncharacterized protein LOC110978061 isoform X2 [Acanthaster planci] (id=75.64%; len=353; e=3.58E-87)			5.446	0.7803	0.660845	14	6	0	0	20.1665	20.172	19.2598	19.6723	19.6864	20.9729	22.0197	22.2752	19.7398	20.067	20.1228	-0.629723	-1.77941	0.0459466	0.0374941	regulated
PMI_009326		XP_022089672.1 annexin A13-like [Acanthaster planci] (id=54.39%; len=342; e=1.60E-115)			6.318	0.6971	0.388099	13	11	0	3	20.4	20.7376	20.0025	19.8637	20.1251	21.3479	22.3075	22.3487	20.1535	20.0575	19.8945	-0.571697	-1.96623	0.137509	0.0219399	regulated
m.7575	Pmi_521560_H	H2BL4_STRPU_Late_histone_H2B.L4			4.761	0.7737	0.806259	13	5	4	0	24.1283	24.2011	23.9631	23.9611	23.9557	25.2804	24.9855	24.9269	23.8628	23.8489	23.9392	-0.204693	-1.18067	0.110911	0.00582957	regulated
m.38526	58191	XP_022088423.1 uncharacterized protein LOC110978061 isoform X2 [Acanthaster planci] (id=78.22%; len=225; e=4.55E-60)			7.198	0.8191	0.934134	11	5	1	0	19.0036	18.9776	17.9738	18.4714	18.5121	19.8111	20.9464	21.1949	18.2451	18.8828	18.7797	-0.671512	-2.01492	0.0596758	0.0262833	regulated
PMI_000762; m.19762	None; Pmi_626420_F	XP_022080901.1 uncharacterized protein LOC110973946 isoform X1 [Acanthaster planci] (id=65.14%; len=370; e=3.88E-160) ; FUCL1_ANGJA_Fucolectin-1	206	3	4.196	0.7157	0.606577	11	3	0	1	20.2874	20.1887	19.9951	20.1098	20.1122	21.1994	22.7421	22.0691	20.2657	20.0753	19.8335	-0.165692	-1.94535	0.107645	0.0404999	regulated
PMI_001482		XP_022080822.1 myosin regulatory light chain 2, smooth muscle major isoform-like [Acanthaster planci] (id=96.57%; len=175; e=4.41E-121)			6.012	0.7896	0.520682	11	7	5	2	21.1337	21.4038	21.0071	21.0054	21.1666	22.0357	22.8627	23.1055	20.7993	20.9046	20.6285	-0.209048	-1.89053	0.341806	0.0227375	regulated
PMI_006890; PMI_006881		RLQ69895.1 HIST1H2AB, partial [Cricetulus griseus] (id=78.28%; len=244; e=9.41E-123) ; RLQ69895.1 HIST1H2AB, partial [Cricetulus griseus] (id=80.41%; len=245; e=2.15E-128)	91	1	4.744	0.6755	0.806259	11	5	0	2	24.0458	24.1539	23.875	23.8593	23.8639	25.3661	25.0372	25.0065	23.7548	23.745	23.8439	-0.233753	-1.35541	0.142444	0.0045639	regulated
m.34320	51540	XP_022081682.1 myophilin-like [Acanthaster planci] (id=74.87%; len=187; e=1.00E-100)			5.536	0.8208	0.134443	10	4	1	3	20.1853	21.1917	20.4617	20.2122	20.4925	22.1666	23.3261	23.4522	20.0317	19.8304	19.6222	-0.299737	-3.15351	0.657533	0.0114244	regulated
m.29944	Pmi_665362_P	PGBM_MOUSE_Basement_membrane-specific_heparan_sulfate_prot..CUT			7.214	0.8032	0.520579	9	9	0	5	19.5136	20.1563	19.2167	19.3129	19.6186	20.6965	21.6374	21.7171	19.1358	19.4741	19.4914	-0.452201	-1.98326	0.374387	0.0173632	regulated
PMI_017043		XP_022082452.1 cysteine-rich motor neuron 1 protein-like [Acanthaster planci] (id=60.00%; len=685; e=0.00E+00)			5.504	0.7831	0.501757	9	7	2	5	20.1404	20.3042	20.1455	19.9738	20.0125	20.6347	21.3485	21.4771	20.2389	20.0604	19.9561	-0.178339	-1.06832	0.219555	0.0447604	regulated
m.34316	51531	XP_022081682.1 myophilin-like [Acanthaster planci] (id=77.54%; len=187; e=3.05E-102)			5.536	0.8208	0.134443	8	4	0	3	19.6812	20.7312	19.6264	19.6433	20.0254	21.8592	23.083	23.1673	19.4361	19.2347	19.034	-0.441138	-3.46823	0.551831	0.0102602	regulated
PMI_002491		XP_022106533.1 cysteine and glycine-rich protein 2-like [Acanthaster planci] (id=87.10%; len=93; e=2.38E-43)			3.888	0.7792	0.05169	8	3	1	0	19.5813	20.0883	19.7945	19.6752	19.7041	20.9649	22.0966	22.3681	19.5498	19.6947	19.4066	-0.110179	-2.25949	0.739047	0.030477	regulated
PMI_009586		XP_022090463.1 basement membrane-specific heparan sulfate proteoglycan core protein-like isoform X4 [Acanthaster planci] (id=63.67%; len=1902; e=0.00E+00)			4.182	0.7652	1.01971	8	7	0	3	19.3897	19.9635	18.789	19.138	19.392	20.6208	21.5549	21.6001	19.1149	19.3443	19.3742	-0.570254	-1.98077	0.248398	0.0196755	regulated
m.26715; PMI_005217	Pmi_655050_R; None	RIR2_MOUSE_Ribonucleoside-diphosphate_reductase_subunit_M2; XP_022090701.1 ribonucleoside-diphosphate reductase subunit M2 B-like isoform X1 [Acanthaster planci] (id=92.44%; len=397; e=0.00E+00)	2202	6	3.26	0.7169	0.232325	7	6	0	4	18.9036	18.9035	17.8565	17.9712	17.8948	19.7188	19.5561	19.7087	18.4109	18.4183	18.3213	-0.996038	-1.27769	0.0011434	0.000141409	regulated
m.27091	Pmi_656240_U	UNC22_CAEEL_Twitchin			5.962	0.765	1.10506	7	7	1	6	18.0879	18.7808	18.1677	17.8789	18.0634	19.4497	20.4342	20.6018	17.4502	17.9786	17.735	-0.39767	-2.44062	0.449336	0.0112115	regulated
m.30732	45827	XP_022106533.1 cysteine and glycine-rich protein 2-like [Acanthaster planci] (id=52.90%; len=155; e=1.59E-43)			3.888	0.8255	1.26165	7	4	2	0	19.7101	20.2503	19.96	19.7177	19.7713	21.2035	22.3444	22.6241	19.4624	19.7728	19.7429	-0.16387	-2.39797	0.652198	0.0264126	regulated
PMI_004211		XP_022090463.1 basement membrane-specific heparan sulfate proteoglycan core protein-like isoform X4 [Acanthaster planci] (id=75.79%; len=1301; e=0.00E+00)			4.182	0.7652	0.894944	7	7	1	1	19.4312	19.9761	18.94	19.0601	19.4868	20.5906	21.6347	21.6608	19.0954	19.3311	19.3464	-0.541355	-2.03775	0.248506	0.023864	regulated
m.13840	19332	XP_022087478.1 CUB and sushi domain-containing protein 3-like [Acanthaster planci] (id=83.96%; len=798; e=0.00E+00)			5.323	0.808	0.548855	7	4	1	3	17.6953	17.9087	17.4745	17.9553	17.641	18.74	19.5633	20.0333	17.599	18.0812	17.9397	-0.11172	-1.5722	0.572521	0.0397948	regulated
PMI_014838		QAA95973.1 immunoglobulin-related protein 1 [Asterias rubens] (id=56.52%; len=115; e=3.58E-37)			2.851	0.6288	0.755585	6	3	3	0	20.2639	21.3848	20.2502	20.2871	20.682	22.7079	23.9844	24.1053	20.4097	20.481	19.7993	-0.417857	-3.36924	0.589993	0.00737704	regulated
PMI_000672; m.19906	None; Pmi_627181_Y	XP_022089071.1 uncharacterized peptidase C1-like protein F26E4.3 [Acanthaster planci] (id=79.36%; len=441; e=0.00E+00) ; YCF2E_CAEEL_Uncharacterized_peptidase_C1-like_protein_F26E4.3	2110	5	5.333	0.8243	1.28808	6	5	0	4	19.1136	19.3352	18.4404	18.4367	18.8198	20.3377	21.3637	21.6887	18.7311	19.0663	18.6803	-0.658782	-2.30411	0.0321577	0.022432	regulated
PMI_015328		XP_022106309.1 histone H2A-like [Acanthaster planci] (id=96.72%; len=122; e=1.77E-78)			4.868	0.7408	0.009546	6	3	1	2	18.9751	19.0546	18.5927	18.4751	18.7189	20.7924	20.474	20.3313	18.5142	18.5678	18.6795	-0.419296	-1.94539	0.0152444	0.00213461	regulated
m.30235	Pmi_665970_L	LEG9_BOVIN_Galectin-9			4.304	0.6579	1.33938	6	3	1	0	19.6691	19.8516	19.2174	19.3368	19.5222	20.4651	21.3469	21.3474	19.5806	19.514	19.4527	-0.401529	-1.53737	0.0615042	0.0329698	regulated
PMI_018419		XP_022111353.1 galectin-9-like [Acanthaster planci] (id=47.55%; len=347; e=7.61E-88)			4.914	0.6832	1.32709	6	3	0	1	19.9149	20.054	19.6757	19.9629	20.0269	20.6876	21.3561	21.4045	20.0227	19.9144	19.9792	-0.0959437	-1.17729	0.509658	0.0344603	regulated
m.3176	Pmi_415520_n	no_annot			4.782	0.7657	1.12503	6	6	1	5	18.3642	18.3091	18.0022	18.1928	18.1654	18.7174	19.2843	19.4897	17.9194	18.3115	18.2197	-0.216538	-1.01361	0.0530793	0.0301089	regulated
m.17975	Pmi_617323_T	TITIN_MOUSE_Titin			3.79	0.6385	1.05708	5	5	1	0	18.6575	19.3364	18.5089	18.5229	18.5161	20.0288	21.0953	21.33	18.4882	18.3769	18.2927	-0.480995	-2.43213	0.391212	0.024173	regulated
m.32057	Pmi_670860_P	PGBM_HUMAN_Basement_membrane-specific_heparan_sulfate_pro..CUT			4.182	0.7652	1.01971	5	4	0	4	17.8769	18.1126	16.7515	17.5004	17.7049	19.1066	19.908	19.7515	17.8863	17.7475	17.7301	-0.675831	-1.80072	0.134248	0.0151274	regulated
PMI_022466		XP_022082308.1 tubulin polymerization-promoting protein family member 2-like [Acanthaster planci] (id=82.35%; len=170; e=3.64E-96)			4.709	0.7452	0.682854	5	3	1	2	18.1307	18.8663	18.1423	17.9142	18.2551	19.27	20.0312	20.0367	18.1336	18.3908	18.0612	-0.394624	-1.58407	0.47043	0.0149949	regulated
PMI_010307; PMI_012964		XP_022108859.1 Golgi SNAP receptor complex member 1-like isoform X2 [Acanthaster planci] (id=94.00%; len=250; e=9.32E-170) ; XP_022108859.1 Golgi SNAP receptor complex member 1-like isoform X2 [Acanthaster planci] (id=97.94%; len=243; e=9.54E-175)	1987	5	5.153	0.7099	0.68883	5	5	0	2	20.2628	20.5409	20.1146	19.8244	19.9914	21.0617	21.7658	21.8806	20.1268	20.0385	19.8529	-0.425014	-1.56326	0.137773	0.0183106	regulated
PMI_001549		XP_022095164.1 multidrug resistance-associated protein 5-like [Acanthaster planci] (id=71.02%; len=1087; e=0.00E+00)			2.334	0.7129	0.302772	5	4	0	4	22.4237	22.7787	22.4882	22.0549	22.1008	23.3741	23.2527	22.7427	21.5992	21.453	22.2065	-0.386517	-1.37024	0.217444	0.0111592	regulated
m.16138	Pmi_606390_E	ENP1_TORCA_Electromotor_neuron-associated_protein_1			4.123	0.6807	1.10821	5	5	2	3	19.546	19.7747	19.3717	19.3651	19.379	20.2253	21.0494	21.1138	19.6145	19.5505	19.2352	-0.288425	-1.32945	0.240012	0.029537	regulated
PMI_011936		XP_022100335.1 cholinesterase 2-like [Acanthaster planci] (id=58.87%; len=462; e=8.30E-180)			3.863	0.6929	0.778737	4	3	2	1	18.0514	18.4219	17.4545	17.7071	17.7546	18.7871	19.92	19.9012	17.9302	17.6349	17.6375	-0.597917	-1.80186	0.138755	0.0336317	regulated
PMI_019013		XP_022088268.1 troponin I-like isoform X1 [Acanthaster planci] (id=66.94%; len=363; e=2.23E-77)			3.253	0.6815	0.949881	4	3	2	1	16.7146	16.9713	16.6023	16.4406	16.609	17.5292	18.426	18.4561	16.5685	16.5355	16.3796	-0.292296	-1.64261	0.225792	0.0289284	regulated
PMI_012953		ODM91810.1 40S ribosomal protein S29 [Orchesella cincta] (id=82.14%; len=56; e=4.88E-28)			1.712	0.4287	0.489144	4	1	1	0	20.8409	21.4216	20.3158	20.5447	20.7601	22.3229	22.5785	22.4574	21.0806	20.8391	21.0193	-0.591023	-1.47332	0.254582	0.000141517	regulated
m.31279	Pmi_669000_E	E41L3_MOUSE_Band_4.1-like_protein_3			3.877	0.6983	1.05322	4	4	0	4	17.1966	17.3463	16.6853	16.8573	16.7856	17.6806	18.1986	18.2955	17.1808	17.0953	16.7344	-0.495374	-1.05472	0.0352164	0.0136146	regulated
PMI_004989		XP_022095234.1 collagen alpha-2(IV) chain-like [Acanthaster planci] (id=59.97%; len=1424; e=0.00E+00)			2.6	0.6458	1.42673	3	2	0	1	16.8143	17.407	16.3123	16.1131	16.4647	18.0289	19.2197	19.2268	16.2251	16.3703	16.1574	-0.813944	-2.57418	0.193012	0.020937	regulated
m.27099; PMI_003973	Pmi_656241_U; None	UNC22_CAEEL_Twitchin; XP_022091187.1 twitchin-like isoform X6 [Acanthaster planci] (id=88.58%; len=998; e=0.00E+00)	1549	3	2.89	0.7169	1.19985	3	3	0	2	18.0173	18.2963	17.564	17.623	17.5137	19.2307	20.1615	20.2663	17.6384	17.6318	17.5939	-0.58991	-2.2648	0.133241	0.0203202	regulated
PMI_027688		XP_022088423.1 uncharacterized protein LOC110978061 isoform X2 [Acanthaster planci] (id=70.00%; len=160; e=4.47E-37)			2.84	0.6033	1.71866	3	3	2	0	17.6891	18.0736	16.9221	17.1446	17.3076	18.264	19.2993	19.4735	17.0682	17.541	17.6293	-0.756594	-1.59944	0.0961188	0.0346854	regulated
m.53674; PMI_008156; m.28131	79941; None; Pmi_659480_C	XP_022095084.1 collagen alpha-5(IV) chain-like [Acanthaster planci] (id=75.77%; len=454; e=3.32E-160) ; XP_009966757.1 PREDICTED: collagen alpha-1(IV) chain [Tyto alba] (id=41.48%; len=1625; e=0.00E+00) ; COLL7_MIMIV_Collagen-like_protein_7	1698	3	3.32	0.7925	0.414191	3	3	0	0	16.5709	16.759	16.2099	15.8625	15.8954	16.7651	17.615	17.6621	15.9901	15.8565	15.4022	-0.675689	-1.59778	0.0201452	0.0147797	regulated
m.30872	Pmi_667930_L	LAMB1_DROME_Laminin_subunit_beta-1			3.664	0.5857	0.197431	3	3	2	0	17.6917	18.2431	17.6951	17.6312	17.7309	18.5122	19.0305	19.3496	17.7904	18.072	17.6872	-0.281653	-1.11423	0.491975	0.0284673	regulated
m.28526; m.52528; PMI_018490; m.52524	Pmi_660760_N; 78276; None; 78274	NRCAM_CHICK_Neuronal_cell_adhesion_molecule; XP_022105026.1 neuronal cell adhesion molecule-like isoform X4 [Acanthaster planci] (id=72.45%; len=1256; e=0.00E+00) ; XP_022105026.1 neuronal cell adhesion molecule-like isoform X4 [Acanthaster planci] (id=58.04%; len=1051; e=0.00E+00) ; XP_022105019.1 neuronal cell adhesion molecule-like isoform X1 [Acanthaster planci] (id=72.31%; len=1275; e=0.00E+…	1668	3	4.943	0.7831	1.9523	3	3	0	3	17.2106	17.9764	17.0386	17.1492	17.3525	17.9565	18.4353	18.3994	17.3083	17.1911	17.1225	-0.413391	-1.05645	0.469658	0.0129225	regulated
PMI_015398; m.57040; m.6384	None; 85304; Pmi_503970_C	XP_022084959.1 2-oxoglutarate and iron-dependent oxygenase domain-containing protein 3-like [Acanthaster planci] (id=69.21%; len=328; e=7.41E-156) ; XP_022084959.1 2-oxoglutarate and iron-dependent oxygenase domain-containing protein 3-like [Acanthaster planci] (id=82.44%; len=262; e=2.01E-159) ; CQ101_XENTR_PKHD_domain-containing_transmembrane_protein_C1..CUT	1991	1	1.619	0.2742	2.21109	2	1	0	0	19.6268	20.2526	18.7935	17.4437	16.8629	16.6209	18.4049	16.7451	15.7485	17.5301	16.3927	-2.23965	-0.699886	0.0444189	0.418509	regulated
PMI_006628		XP_022099481.1 citron Rho-interacting kinase-like [Acanthaster planci] (id=72.36%; len=720; e=0.00E+00)			3.064	0.5806	1.19929	2	2	0	0	17.4618	17.5528	16.4513	15.8048	15.527	15.8929	16.95	15.9185	15.359	15.853	15.2948	-1.57959	-0.751532	0.0261383	0.150984	regulated
PMI_000263; m.56120; m.56129; m.31757	None; 83624; 83627; Pmi_670130_D	AFR91943.1 DNA cytosine-5-methyltransferase 1 [Patiria pectinifera] (id=95.74%; len=1619; e=0.00E+00) ; AFR91943.1 DNA cytosine-5-methyltransferase 1 [Patiria pectinifera] (id=99.31%; len=1451; e=0.00E+00) ; AFR91943.1 DNA cytosine-5-methyltransferase 1 [Patiria pectinifera] (id=99.42%; len=1383; e=0.00E+00) ; DNMT1_PARLI_DNA_(cytosine-5)-methyltransferase_PliMCI	1595	2	2.939	0.5641	0.462723	2	2	0	2	18.7668	19.0353	17.6474	17.7679	17.8116	19.3131	19.2871	19.1489	17.6019	17.8092	17.8669	-1.15874	-1.49037	0.0473657	0.00028336	regulated
m.8105	Pmi_531300_n	no_annot			3.098	0.673	0.186512	2	1	1	0	17.9224	17.967	16.7766	16.8791	16.7975	18.5469	18.5953	18.5685	17.8078	17.7055	17.585	-1.12697	-0.870807	8.70321e-05	0.00395938	regulated
PMI_004380		XP_022080901.1 uncharacterized protein LOC110973946 isoform X1 [Acanthaster planci] (id=62.60%; len=361; e=1.35E-142)			3.845	0.5888	1.15814	2	2	1	1	15.2206	15.1847	14.954	15.0773	14.8282	17.0357	18.3431	17.8451	14.7967	14.5206	14.6098	-0.249453	-3.09894	0.0666491	0.011924	regulated
PMI_008995; m.12612	None; Pmi_580650_M	XP_022087075.1 myosin light chain 3, skeletal muscle isoform-like [Acanthaster planci] (id=60.78%; len=153; e=3.39E-53) ; MYL6B_HUMAN_Myosin_light_chain_6B	2388	2	3.139	0.7206	1.82922	2	2	0	1	18.9942	19.5097	19.0135	19.0511	19.0687	20.7747	21.7945	22.1109	18.6342	18.497	18.3509	-0.207516	-3.06601	0.568243	0.0140188	regulated
m.31656; PMI_000918; m.44110	Pmi_669931_E; None; 66212	EGFL6_XENLA_Epidermal_growth_factor-like_protein_6; XP_022080925.1 fibrillin-1-like isoform X2 [Acanthaster planci] (id=66.05%; len=1305; e=0.00E+00) ; XP_022080924.1 fibrillin-1-like isoform X1 [Acanthaster planci] (id=74.09%; len=772; e=0.00E+00)	2068	1	4.242	0.7421	1.48521	2	1	0	0	15.6042	16.3538	14.9661	15.3019	15.3094	16.9492	18.0406	18.2187	14.8816	15.6356	15.158	-0.786583	-2.5111	0.262281	0.0104341	regulated
m.28860	Pmi_661430_S	SMTN_HUMAN_Smoothelin			3.235	0.744	1.66916	2	2	0	2	16.9626	17.4592	16.8226	16.3371	16.5961	17.985	18.8201	18.9448	16.2618	16.5312	16.5864	-0.625624	-2.12345	0.185316	0.0126838	regulated
m.29943	Pmi_665361_n	no_annot			3.594	0.6625	1.47493	2	2	2	0	15.6889	16.1926	15.3519	15.3267	15.7623	16.9872	17.9156	17.7787	15.3117	15.6634	15.454	-0.460478	-2.08412	0.277112	0.0114912	regulated
m.28484; PMI_005713; m.41607	Pmi_660802_N; None; 62950	NID1_MOUSE_Nidogen-1; XP_022081243.1 LOW QUALITY PROTEIN: nidogen-1-like [Acanthaster planci] (id=86.98%; len=430; e=0.00E+00) ; XP_022081243.1 LOW QUALITY PROTEIN: nidogen-1-like [Acanthaster planci] (id=70.81%; len=764; e=0.00E+00)	700	2	2.763	0.6971	0.53506	2	2	0	2	17.8597	18.1884	17.4931	17.4768	17.8076	18.9351	19.9152	19.8869	17.667	17.7968	17.3277	-0.431522	-1.98192	0.16797	0.0141432	regulated
PMI_012291; PMI_027896		XP_022100335.1 cholinesterase 2-like [Acanthaster planci] (id=64.29%; len=434; e=0.00E+00) ; XP_022100335.1 cholinesterase 2-like [Acanthaster planci] (id=50.93%; len=430; e=1.45E-134)	784	2	6.593	0.7594	1.68912	2	2	0	2	15.8846	16.4284	15.884	16.283	16.0326	17.1827	17.8782	18.1451	15.9122	16.1019	15.5174	-0.0899093	-1.89151	0.800677	0.00860838	regulated
PMI_023904		XP_022103862.1 rasGAP-activating-like protein 1 isoform X4 [Acanthaster planci] (id=91.63%; len=514; e=0.00E+00)			3.511	0.548	1.40547	2	2	0	2	16.7892	16.9301	16.6391	16.7684	17.3521	18.3143	18.8002	18.68	17.116	16.8828	17.0893	0.0602239	-1.56879	0.814646	0.00255993	regulated
m.51643	77116	XP_022088425.1 uncharacterized protein LOC110978062 isoform X2 [Acanthaster planci] (id=88.55%; len=131; e=3.41E-75)			5.491	0.8031	1.79354	2	2	1	0	15.5913	15.8012	15.0792	15.3387	15.4499	16.2828	17.3042	17.5566	15.3403	15.919	15.7631	-0.406986	-1.37371	0.0826567	0.0544646	regulated
m.44593; m.44607; PMI_002144	66961; 66966; None	XP_022082200.1 synaptic vesicle membrane protein VAT-1 homolog-like isoform X3 [Acanthaster planci] (id=92.95%; len=156; e=5.67E-101) ; XP_022082200.1 synaptic vesicle membrane protein VAT-1 homolog-like isoform X3 [Acanthaster planci] (id=80.42%; len=189; e=1.17E-102) ; XP_022082198.1 synaptic vesicle membrane protein VAT-1 homolog-like isoform X1 [Acanthaster planci] (id=80.62%; len=449; e=0.00…	2709	1	3.356	0.5193	0.901352	2	1	0	0	16.6825	17.2768	16.7174	16.7065	16.8143	17.3872	18.0983	18.0332	16.5429	16.4183	16.6355	-0.233585	-1.30736	0.575167	0.0223324	regulated
PMI_022248; m.29022	None; Pmi_662212_L	XP_022111349.1 galectin-4-like [Acanthaster planci] (id=78.83%; len=326; e=6.44E-176) ; LEG8_RAT_Galectin-8	868	2	3.518	0.6941	1.46517	2	2	0	1	17.1416	17.4793	16.9803	17.2945	17.4799	18.2391	19.0512	19.062	17.9646	17.4825	17.4289	-0.0589279	-1.15876	0.812779	0.0304338	regulated
PMI_002936		XP_022080329.1 histone H1, early embryonic-like [Acanthaster planci] (id=83.87%; len=93; e=2.63E-47)			3.833	0.5249	1.16623	2	2	2	0	17.9565	18.4332	17.7773	18.1795	18.3593	18.9672	19.6656	19.5596	18.2333	18.2205	18.5723	-0.089462	-1.05541	0.789158	0.0226145	regulated
PMI_002363		XP_022090729.1 dynein heavy chain 6, axonemal-like isoform X3 [Acanthaster planci] (id=86.18%; len=3024; e=0.00E+00)			5.532	0.7198	0.623907	2	2	0	2	12.4605	12.3194	14.0324	14.5548	14.2018	14.3083	14.8191	14.5581	14.4014	14.3755	14.0315	1.87302	-0.29238	0.00254903	0.201065	regulated
m.22375; m.43707	Pmi_638550_H; 65710	HEXP_LEIMA_DNA-binding_protein_HEXBP; XP_022098836.1 DNA-binding protein HEXBP-like isoform X2 [Acanthaster planci] (id=61.91%; len=210; e=7.13E-77)	319	1	5.475	0.7613	0.822883	2	1	0	0	13.4656	13.1119	13.4623	12.6905	13.4533	12.1989	12.6334	12.8618	13.7518	13.6622	13.2772	-0.0867009	0.999001	0.798508	0.0171563	regulated
m.35878; m.26455	54048; Pmi_654070_C	XP_022108779.1 DNA replication factor Cdt1-like [Acanthaster planci] (id=71.21%; len=858; e=0.00E+00) ; CDT1_XENLA_DNA_replication_factor_Cdt1	2684	1	2.011	0.6435	2.55853	1	1	0	0	15.8466	15.8068	13.7652	13.9687	13.7712	16.5195	16.2896	16.4656	14.4811	14.3492	14.1394	-1.99166	-2.10169	0.000506262	0.000140923	one peptide
m.14194; m.42510; PMI_027346	Pmi_592710_P; 64133; None	PIM2_BOVIN_Serine/threonine-protein_kinase_pim-1; XP_022081147.1 serine/threonine-protein kinase pim-1-like [Acanthaster planci] (id=93.63%; len=204; e=1.37E-136) ; XP_022081147.1 serine/threonine-protein kinase pim-1-like [Acanthaster planci] (id=89.14%; len=359; e=0.00E+00)	2764	1	3.628	0.5234	0.453133	1	1	0	0	15.8137	15.5685	14.2326	14.0572	14.6156	16.6094	16.5494	16.3784	14.9805	14.9455	14.5006	-1.38932	-1.70353	0.00665635	0.00290458	one peptide
m.42326; m.42328; m.13913; m.42329	63915; 63916; Pmi_591230_T; 63917	XP_022102938.1 titin-like [Acanthaster planci] (id=89.72%; len=253; e=4.17E-148) ; XP_022102938.1 titin-like [Acanthaster planci] (id=93.23%; len=133; e=3.76E-75) ; TITIN_MOUSE_Titin; XP_022102938.1 titin-like [Acanthaster planci] (id=89.08%; len=284; e=1.13E-165)	2460	1	2.574	0.6636	1.59264	1	1	0	0	13.9714	15.8319	13.7853	13.7226	13.6914	14.7619	15.0987	15.4738	13.772	13.9173	13.98	-1.16855	-1.22169	0.427897	0.0200499	one peptide
m.45007	67385	XP_022093006.1 equilibrative nucleoside transporter 1-like isoform X1 [Acanthaster planci] (id=76.67%; len=463; e=0.00E+00)			3.141	0.4893	0.642403	1	1	1	0	17.8946	18.2877	17.5161	16.7852	16.468	17.1065	17.2194	16.8237	16.9798	16.841	16.7464	-1.16803	-0.194151	0.0507848	0.242922	one peptide
PMI_010726		XP_022084125.1 uncharacterized protein LOC110975718 [Acanthaster planci] (id=44.44%; len=261; e=1.97E-59)			2.089	0.2609	0.243826	1	1	1	0	17.921	17.7595	16.5367	16.7048	17.1719	17.9729	19.0237	19.3448	16.6204	17.5067	18.2367	-1.03577	-1.32588	0.0209902	0.101992	one peptide
m.58322	88100	88100|g.58322 type:internal len:104 gc:universal 88100:1-309(+)			1.367	0.2948	0.250484	1	1	1	0	12.9668	12.951	12.0074	11.749	12.1077	14.1088	15.1942	15.4312	11.9282	13.01	12.73	-1.00418	-2.35537	0.0108114	0.0118745	one peptide
PMI_014709; m.15917	None; Pmi_604992_K	XP_022082453.1 zonadhesin-like [Acanthaster planci] (id=54.85%; len=1898; e=0.00E+00) ; KCP_XENLA_Kielin/chordin-like_protein	2089	1	2.172	0.541	1.31491	1	1	0	0	18.8136	19.301	17.9902	18.3419	18.3756	19.9319	21.0109	21.2212	18.0967	18.3698	17.9552	-0.821428	-2.58078	0.130435	0.0164426	one peptide
PMI_014410; m.26384	None; Pmi_653960_T	XP_022089021.1 uncharacterized peptidase C1-like protein F26E4.3 [Acanthaster planci] (id=89.89%; len=455; e=0.00E+00) ; TINAL_MOUSE_Tubulointerstitial_nephritis_antigen-like	2878	1	2.67	0.3307	1.95477	1	1	0	0	16.2616	16.6537	16.4037	16.0282	16.1797	17.5072	18.1383	18.1238	15.8961	16.1385	15.728	-0.253776	-2.00226	0.396733	0.00286367	one peptide
PMI_001239; PMI_001238; PMI_026235		XP_022102311.1 trypsin inhibitor ClTI-1-like isoform X1 [Acanthaster planci] (id=48.75%; len=80; e=1.59E-16) ; XP_022102311.1 trypsin inhibitor ClTI-1-like isoform X1 [Acanthaster planci] (id=50.00%; len=88; e=7.38E-18) ; XP_022102311.1 trypsin inhibitor ClTI-1-like isoform X1 [Acanthaster planci] (id=47.73%; len=88; e=2.68E-17)	2550	1	3.182	0.533	1.66828	1	1	0	0	15.9157	15.1802	15.5746	15.3141	15.6191	17.2476	18.1772	17.7161	15.8779	16.1677	15.1998	-0.0453378	-1.96518	0.92255	0.00755855	one peptide
m.15351; m.9765	Pmi_601360_n; 14835	no_annot; XP_022098364.1 uncharacterized protein LOC110983422 [Acanthaster planci] (id=50.51%; len=196; e=5.31E-55)	2768	1	2.861	0.4803	1.36465	1	1	0	0	16.5027	16.9667	16.0677	16.3113	16.2577	17.3414	18.4562	18.3392	16.2951	16.0976	16.12	-0.522464	-1.87473	0.242309	0.0305844	one peptide
m.40631; m.40633	61342; 61343	KYO41897.1 unc-45-like protein B [Alligator mississippiensis] (id=38.09%; len=63; e=2.70E+00) ; EKD92181.1 hypothetical protein ACD_29C00132G0002 [uncultured bacterium] (id=28.26%; len=92; e=2.50E-02)	421	1	1.571	0.2833	0.231005	1	1	0	0	17.2062	17.217	16.5246	16.6764	16.8425	17.9898	19.1019	19.3127	16.5787	16.7622	17.5467	-0.530464	-1.8389	0.0283038	0.0259785	one peptide
m.49110	73513	XP_022080827.1 high mobility group protein HMGI-C-like [Acanthaster planci] (id=77.10%; len=131; e=1.58E-37)			1.806	0.485	1.25762	1	1	1	0	18.1265	18.4944	17.7967	17.7296	17.7909	19.0608	20.0591	20.1152	18.1378	17.8934	17.7372	-0.537998	-1.82221	0.205674	0.023967	one peptide
m.12106; PMI_023555; PMI_011590; m.12110	17496; None; None; 17498	XP_022082069.1 prickle-like protein 3 isoform X1 [Acanthaster planci] (id=96.13%; len=310; e=0.00E+00) ; XP_022082071.1 four and a half LIM domains protein 3-like isoform X3 [Acanthaster planci] (id=82.53%; len=269; e=1.91E-152) ; XP_022082069.1 prickle-like protein 3 isoform X1 [Acanthaster planci] (id=95.97%; len=298; e=0.00E+00) ; XP_022082071.1 four and a half LIM domains protein 3-like isofo…	2399	1	3.112	0.6195	0.432591	1	1	0	0	15.6356	16.4367	15.4895	15.9945	15.7706	16.7975	17.7355	17.8563	15.7208	15.5412	15.8666	-0.284629	-1.75354	0.60476	0.0272541	one peptide
m.35537; PMI_005216; m.29053; PMI_001912	53501; None; Pmi_662330_T; None	XP_022092218.1 tektin-B1-like [Acanthaster planci] (id=95.81%; len=430; e=0.00E+00) ; XP_022092218.1 tektin-B1-like [Acanthaster planci] (id=95.81%; len=430; e=0.00E+00) ; TKB1_STRPU_Tektin-B1; XP_022092218.1 tektin-B1-like [Acanthaster planci] (id=96.05%; len=430; e=0.00E+00)	287	1	3.145	0.6149	1.496	1	1	0	0	13.6147	14.1618	13.3437	13.391	13.0899	15.776	14.687	14.8264	13.6143	13.4323	13.2317	-0.613419	-1.67038	0.240475	0.0299048	one peptide
PMI_024996		XP_022080139.1 bursicon-like [Acanthaster planci] (id=76.76%; len=142; e=2.63E-68)			1.758	0.5802	1.6888	1	1	1	0	15.2722	15.9174	15.3245	15.5253	15.0743	16.5715	17.3759	17.3249	14.818	16.0595	15.5449	-0.286725	-1.61665	0.531095	0.0258367	one peptide
PMI_002194		XP_022092147.1 histone H1-beta, late embryonic-like [Acanthaster planci] (id=72.73%; len=99; e=2.59E-39)			2.263	0.3266	1.57936	1	1	1	0	17.7801	18.1524	17.6391	17.428	17.6393	18.6019	19.394	19.3978	17.444	17.6234	17.5163	-0.397415	-1.60336	0.248771	0.0227262	one peptide
PMI_011367		XP_022095221.1 cyclin-dependent kinases regulatory subunit-like [Acanthaster planci] (id=82.26%; len=62; e=1.29E-31)			2.68	0.6075	1.36563	1	1	1	0	15.2808	15.2853	14.8066	14.7998	15.2469	16.9769	17.1636	16.7259	15.166	15.2202	15.947	-0.331948	-1.51109	0.153938	0.0132261	one peptide
m.13584; PMI_002837	Pmi_588720_S; None	SF3A2_HUMAN_Splicing_factor_3A_subunit_2; XP_022094954.1 splicing factor 3A subunit 2-like [Acanthaster planci] (id=84.34%; len=281; e=6.84E-155)	1268	1	3.395	0.5835	0.564865	1	1	0	0	12.9644	13.5744	11.774	12.4541	13.0331	14.8577	14.6804	14.9921	13.3191	13.0652	13.6285	-0.849004	-1.50586	0.174308	0.00340648	one peptide
PMI_010698; m.25104; m.7666	None; Pmi_649251_F; 12184	XP_022087014.1 fibrillin-2-like isoform X2 [Acanthaster planci] (id=73.39%; len=545; e=0.00E+00) ; FBN2_MOUSE_Fibrillin-2; XP_022087014.1 fibrillin-2-like isoform X2 [Acanthaster planci] (id=92.36%; len=144; e=1.18E-82)	910	1	1.114	0.3815	0.755129	1	1	0	0	17.7227	17.6368	16.9821	17.4159	16.9148	18.2477	19.1923	19.3581	17.3812	17.5362	17.5907	-0.575467	-1.43001	0.0587683	0.0497399	one peptide
PMI_020839; m.14871	None; Pmi_597780_X	XP_022089809.1 xaa-Pro aminopeptidase 1-like isoform X1 [Acanthaster planci] (id=67.66%; len=436; e=0.00E+00) ; XPP1_MOUSE_Xaa-Pro_aminopeptidase_1	2841	1	3.296	0.584	1.80758	1	1	0	0	16.264	16.3592	16.0029	16.0476	16.423	16.9294	17.8405	17.6855	15.7955	16.1786	16.1972	-0.153727	-1.42807	0.371909	0.0219584	one peptide
m.30687; PMI_015282	Pmi_667481_F; None	FARP1_HUMAN_FERM,_RhoGEF_and_pleckstrin_domain-containin..CUT; XP_022095058.1 FERM, RhoGEF and pleckstrin domain-containing protein 1-like isoform X3 [Acanthaster planci] (id=75.16%; len=161; e=2.48E-65)	1483	1	3.066	0.5802	0.689408	1	1	0	0	11.6702	12.0935	11.8638	11.4526	11.9185	12.7068	13.0342	13.2278	11.6864	11.5335	11.6191	-0.136902	-1.37658	0.649116	0.00788358	one peptide
m.55175; PMI_000857; PMI_020253; m.26730	82188; None; None; Pmi_655130_T	XP_022102924.1 titin-like [Acanthaster planci] (id=90.72%; len=377; e=0.00E+00) ; XP_022102924.1 titin-like [Acanthaster planci] (id=86.30%; len=876; e=0.00E+00) ; XP_022102924.1 titin-like [Acanthaster planci] (id=85.20%; len=980; e=0.00E+00) ; TITIN_DROME_Titin	1914	1	1.64	0.475	2.73811	1	1	0	0	14.8929	14.9497	14.6726	14.6422	14.8524	15.6227	16.2041	16.4721	14.5557	14.8556	14.7941	-0.198899	-1.36452	0.079714	0.0217983	one peptide
PMI_012198; m.16974; m.21920	None; Pmi_611420_P; 30354	XP_022083974.1 peptidyl-prolyl cis-trans isomerase B-like [Acanthaster planci] (id=73.33%; len=225; e=8.80E-114) ; PPIB_BOVIN_Peptidyl-prolyl_cis-trans_isomerase_B; XP_022083974.1 peptidyl-prolyl cis-trans isomerase B-like [Acanthaster planci] (id=74.11%; len=224; e=6.22E-114)	1323	1	2.312	0.4758	0.94161	1	1	0	0	17.335	17.6436	16.9038	17.0164	17.2121	18.0504	18.7885	18.8678	17.4776	17.1078	17.0615	-0.44527	-1.35325	0.151945	0.0194225	one peptide
m.27992; m.26911	41056; Pmi_655710_n	XP_022080171.1 LOW QUALITY PROTEIN: partitioning defective 3 homolog [Acanthaster planci] (id=76.67%; len=300; e=7.60E-130) ; no_annot	1877	1	2.935	0.4099	1.76261	1	1	0	0	14.0769	14.007	13.7756	13.6164	13.8632	14.4677	15.3413	15.4559	13.8357	13.8312	13.6008	-0.290185	-1.33238	0.0419758	0.0437636	one peptide
PMI_013020; m.1336	None; Pmi_285240_n	XP_022111669.1 uncharacterized protein LOC110990895 [Acanthaster planci] (id=59.40%; len=133; e=2.57E-36) ; no_annot	1804	1	2.704	0.5499	1.63294	1	1	0	0	16.7268	16.4939	14.9805	16.2337	16.2954	18.1933	18.194	18.1555	16.8985	16.841	16.8799	-0.773813	-1.30782	0.207725	9.99238e-07	one peptide
m.39630; m.39625	59842; 59839	59842|g.39630 type:complete len:145 gc:universal 59842:115-549(+); 59839|g.39625 type:5prime_partial len:149 gc:universal 59839:3-449(+)	407	1	1.679	0.3228	2.02154	1	1	0	0	15.5996	15.5617	14.7267	14.9444	15.3384	16.7899	17.0137	16.7416	15.6074	15.4448	15.6822	-0.577468	-1.27026	0.082568	0.000371377	one peptide
PMI_002269; PMI_002536		XP_022098381.1 1-phosphatidylinositol 3-phosphate 5-kinase-like isoform X2 [Acanthaster planci] (id=71.80%; len=351; e=3.64E-156) ; XP_022098379.1 1-phosphatidylinositol 3-phosphate 5-kinase-like isoform X1 [Acanthaster planci] (id=70.00%; len=200; e=1.75E-78)	722	1	2.308	0.5438	1.1258	1	1	0	0	17.5925	17.8288	17.2138	17.2066	17.3039	18.5763	18.9091	18.567	17.4993	17.3855	17.4407	-0.469194	-1.2423	0.137569	0.00498905	one peptide
PMI_008386; m.1836; m.22970	None; 3398; Pmi_641001_H	XP_020913116.1 histone H1-delta isoform X2 [Exaiptasia pallida] (id=74.42%; len=86; e=3.51E-35) ; XP_022109231.1 histone H1-delta-like [Acanthaster planci] (id=75.68%; len=74; e=9.98E-32) ; H10_PONAB_Histone_H1.0	1459	1	2.857	0.4463	1.66807	1	1	0	0	19.2347	19.6249	19.3282	19.4425	19.4444	20.2638	20.8091	20.7567	19.5261	19.5456	19.447	-0.0247455	-1.10364	0.92005	0.021263	one peptide
PMI_000959; m.42777; m.25396; PMI_010909	None; 64368; Pmi_650490_T; None	XP_022251873.1 pre-rRNA-processing protein TSR1 homolog [Limulus polyphemus] (id=56.54%; len=306; e=1.26E-109) ; XP_022099359.1 pre-rRNA-processing protein TSR1 homolog isoform X1 [Acanthaster planci] (id=84.97%; len=519; e=0.00E+00) ; TSR1_XENLA_Pre-rRNA-processing_protein_TSR1_homolog; XP_022099359.1 pre-rRNA-processing protein TSR1 homolog isoform X1 [Acanthaster planci] (id=63.49%; len=304; e…	457	1	2.259	0.5741	1.81844	1	1	0	0	15.139	14.3689	15.4755	14.7781	14.7351	16.0277	15.3783	15.1692	14.7978	14.1494	14.4403	0.242289	-1.06256	0.652104	0.0334952	one peptide
PMI_001731		XP_022088465.1 39S ribosomal protein L32, mitochondrial-like [Acanthaster planci] (id=73.08%; len=182; e=3.43E-92)			4.509	0.7163	2.2165	1	1	1	0	15.2608	15.3373	15.6654	15.5347	15.6145	14.7273	14.1866	14.4411	15.4474	15.5411	15.4603	0.305813	1.0313	0.0150041	0.0192713	one peptide
PMI_027195		XP_022101168.1 small conductance calcium-activated potassium channel protein-like isoform X1 [Acanthaster planci] (id=73.94%; len=687; e=0.00E+00)			1.413	0.2979	2.31015	1	1	1	0	16.2956	16.502	16.4313	16.4435	16.4956	15.9185	15.2561	15.187	16.5698	16.1437	16.7595	0.0579987	1.03712	0.673676	0.0271818	one peptide
PMI_014102; m.5470; PMI_009538	None; Pmi_485590_P; None	XP_022100687.1 poly [ADP-ribose] polymerase 4-like isoform X3 [Acanthaster planci] (id=74.97%; len=1019; e=0.00E+00) ; PARP4_HUMAN_Poly_[ADP-ribose]_polymerase_4; XP_022100685.1 poly [ADP-ribose] polymerase 4-like isoform X1 [Acanthaster planci] (id=80.94%; len=1348; e=0.00E+00)	2116	1	2.914	0.5782	0.504541	1	1	0	0	14.7155	14.9508	14.7155	14.5467	15.4762	14.2256	13.8613	14.6424	15.6605	15.0226	15.698	0.0796565	1.21721	0.815772	0.0180275	one peptide
PMI_014725		XP_022089007.1 myomegalin-like isoform X1 [Acanthaster planci] (id=81.26%; len=1051; e=0.00E+00)			1.371	0.3399	2.04578	1	1	1	0	14.1286	16.9405	14.2503	13.8893	14.0555	13.3034	12.6993	12.8763	13.6497	13.8931	13.921	-1.4695	0.861607	0.485307	0.0247197
PMI_004079		XP_022082456.1 alkaline phosphatase-like [Acanthaster planci] (id=66.98%; len=524; e=0.00E+00)			1.477	0.413	1.70426	1	1	1	0	13.6489	14.6787	13.5716	12.5706	13.2358	13.5912	13.6791	13.8395	12.556	12.9625	13.0016	-1.03777	-0.863206	0.246216	0.0127418
m.48649	72807	XP_022088424.1 uncharacterized protein LOC110978062 isoform X1 [Acanthaster planci] (id=78.51%; len=228; e=1.25E-72)			4.573	0.8085	0.483054	15	6	2	0	20.5284	20.4638	19.8058	19.9074	19.916	20.8914	22.1342	22.2818	19.9563	20.2042	20.1578	-0.619756	-1.66303	0.0013653	0.0597848
PMI_018070		XP_022090663.1 semaphorin-1A-like isoform X2 [Acanthaster planci] (id=67.57%; len=185; e=2.86E-76)			1.158	0.2642	0.219411	1	1	1	0	15.0967	15.239	14.6878	14.356	14.1567	14.2186	15.5036	13.8594	18.1272	14.0249	14.9866	-0.767682	1.18571	0.0256396	0.448184
m.21705; PMI_002178; m.45065	Pmi_635471_C; None; 67457	CO2A1_XENLA_Collagen_alpha-1(II)_chain; XP_022088427.1 collagen alpha-1(I) chain-like [Acanthaster planci] (id=81.28%; len=1330; e=0.00E+00) ; XP_022088427.1 collagen alpha-1(I) chain-like [Acanthaster planci] (id=81.06%; len=1420; e=0.00E+00)	1813	9	6.708	0.8284	0.776071	24	9	0	0	21.5775	21.5195	21.3118	21.3994	21.4606	22.0076	22.8724	23.1185	21.354	21.5364	21.7147	-0.15793	-1.13112	0.0562485	0.0674768
m.5428	Pmi_484700_n	no_annot			4.618	0.695	1.72186	2	2	2	0	14.224	14.6134	14.9572	15.9713	15.5196	20.6429	17.3507	16.3255	14.8636	14.1759	14.1591	1.06402	-3.70684	0.0569105	0.100153
m.53331	79442	79442|g.53331 type:5prime_partial len:106 gc:universal 79442:3219-2902(-)			2.864	0.4894	1.44224	7	1	1	0	24.8056	24.9987	25.3208	23.6629	24.3391	24.1373	24.2715	24.3007	23.5631	23.2882	22.6012	-0.461204	-1.08568	0.440372	0.0589288
m.48636	72798	XP_022088424.1 uncharacterized protein LOC110978062 isoform X1 [Acanthaster planci] (id=79.77%; len=435; e=5.37E-171)			5.97	0.7985	0.626109	10	5	1	3	18.8259	19.1111	18.3276	18.3308	18.4351	19.1143	19.9696	20.2205	18.4187	18.6247	18.6005	-0.604031	-1.22018	0.1304	0.0628695
m.48645	72805	XP_022088424.1 uncharacterized protein LOC110978062 isoform X1 [Acanthaster planci] (id=78.16%; len=435; e=7.01E-166)			5.97	0.7985	0.626109	10	5	0	3	18.8369	19.2104	18.3641	18.3336	18.5073	19.0171	19.7847	20.0049	18.4548	18.6478	18.5906	-0.622028	-1.03787	0.163352	0.0692748
PMI_028145		XP_022089727.1 uncharacterized protein LOC110978770 [Acanthaster planci] (id=42.52%; len=1089; e=0.00E+00)			1.499	0.2809	0.493566	1	1	1	0	17.3676	18.3341	16.7879	15.824	14.9503	14.6177	15.7719	14.5903	14.5467	15.4158	14.9814	-1.99677	-0.0119859	0.0739688	0.980795
m.27914	Pmi_658904_S	SVEP1_RAT_Sushi,_von_Willebrand_factor_type_A,_EGF_and_pen..CUT			3.163	0.6463	0.281273	2	2	0	2	17.7601	19.3318	17.5214	17.1846	17.4553	17.0532	16.9536	17.2169	17.3326	17.3277	17.2195	-1.1589	0.218665	0.37608	0.0861515
PMI_016053		XP_022105613.1 cholinesterase 1-like [Acanthaster planci] (id=65.65%; len=559; e=0.00E+00)			4.044	0.6874	1.37318	3	3	0	1	18.135	19.9855	17.7713	18.1061	18.0621	17.9341	17.8668	17.9518	18.0239	17.986	18.1464	-1.08041	0.134519	0.449096	0.0900653
m.7288; PMI_003952	11665; None	XP_022079081.1 uncharacterized protein LOC110973022 [Acanthaster planci] (id=77.61%; len=259; e=1.69E-141) ; XP_022079081.1 uncharacterized protein LOC110973022 [Acanthaster planci] (id=57.47%; len=663; e=0.00E+00)	1329	1	3.364	0.64	1.94702	1	1	0	0	14.0563	14.2881	13.9008	13.9096	13.4458	15.045	16.5995	16.2442	14.3707	14.721	14.6738	-0.420151	-1.37437	0.116915	0.0928946
PMI_012382		XP_022096476.1 annexin A4-like [Acanthaster planci] (id=88.55%; len=358; e=0.00E+00)			1.227	0.3537	1.2052	1	1	1	0	14.8785	14.8807	14.5583	14.6008	14.8179	13.9821	13.9258	14.0442	16.3508	14.4943	14.5447	-0.220595	1.14592	0.111096	0.201033
PMI_006447		ACJ70121.1 bindin precursor [Patiria miniata] (id=98.45%; len=515; e=0.00E+00)			4	0.6515	1.92561	2	2	2	0	15.969	17.0362	16.7552	17.1533	17.1818	22.1565	18.5545	18.4936	16.882	16.7065	16.135	0.527493	-3.16039	0.498181	0.116238
m.8180; m.36419	Pmi_532370_S; 54793	SNED1_MOUSE_Sushi,_nidogen_and_EGF-like_domain-containing_p..CUT; XP_022081243.1 LOW QUALITY PROTEIN: nidogen-1-like [Acanthaster planci] (id=84.39%; len=173; e=3.29E-91)	486	1	1.818	0.3641	1.11771	1	1	0	0	15.1978	17.2761	14.6105	15.5421	14.921	14.5685	14.2872	14.4747	14.6689	14.5554	14.6711	-1.21243	0.188329	0.443017	0.136447
PMI_001395		XP_022081732.1 creatine kinase U-type, mitochondrial-like [Acanthaster planci] (id=84.30%; len=414; e=0.00E+00)			3.216	0.5513	1.75316	1	1	1	0	14.0531	14.9912	15.6987	16.1466	15.4766	20.7124	17.1773	16.1474	14.8912		14.5696	1.25187	-3.28195	0.188802	0.139094
PMI_010120		XP_022099402.1 usherin-like isoform X1 [Acanthaster planci] (id=84.47%; len=2807; e=0.00E+00)			2.301	0.6565	0.761522	2	2	0	2	16.0826	17.0601	15.9969	14.7499	14.7715	15.1179	15.1828	14.5207	14.6262	15.1452	14.5166	-1.39861	-0.177785	0.141607	0.56853
m.23688	Pmi_643850_R	RHGBA_HUMAN_Rho_GTPase-activating_protein_11A			2.673	0.5638	1.16552	2	2	0	2	17.9827	20.5536	17.4197	17.8972	17.652	18.0488	18.0069	17.9607	17.7845	17.5199	17.9125	-1.61182	-0.266484	0.426819	0.141928
PMI_030289		XP_022088844.1 E3 ubiquitin-protein ligase TRIM71-like [Acanthaster planci] (id=60.08%; len=491; e=0.00E+00)			2.024	0.2727	1.59251	1	1	1	0	16.9723	15.8254	17.4368	18.0749	17.7189	16.8225	16.794	17.7741	18.4598	17.1808	16.0394	1.34473	0.0965026	0.231929	0.908645
m.27911	Pmi_658854_F	FRG1_MOUSE_Protein_FRG1			2.251	0.5709	1.22039	2	2	1	1	17.5375	17.8981	17.4665	17.526	17.7722	17.3022	17.2385	17.258	19.3967	17.2902	18.1856	-0.129564	1.0246	0.604575	0.235151
PMI_006462		XP_022094175.1 uncharacterized protein LOC110981168 isoform X1 [Acanthaster planci] (id=48.67%; len=900; e=0.00E+00)			2.076	0.5332	2.55799	1	1	1	0	14.3281	13.8986	14.2857	14.3969	14.3527	14.2827	13.9276	14.6055	14.3582	16.9158	15.0236	0.231719	1.16059	0.473225	0.266077
m.23643; m.17384; m.17379; PMI_013149; m.17378	Pmi_643690_R; 22795; 22793; None; 22791	RABL3_BOVIN_Rab-like_protein_3; XP_011666947.1 PREDICTED: rab-like protein 3 isoform X4 [Strongylocentrotus purpuratus] (id=72.91%; len=203; e=1.72E-107) ; XP_011666947.1 PREDICTED: rab-like protein 3 isoform X4 [Strongylocentrotus purpuratus] (id=70.31%; len=229; e=3.31E-114) ; XP_011666943.1 PREDICTED: rab-like protein 3 isoform X1 [Strongylocentrotus purpuratus] (id=59.05%; len=254; e=6.38E-94…	2672	5	3.225	0.7306	0.797153	6	5	0	0	18.4671	18.9356	18.7203	18.7697	18.3485	18.0506	18.3146	17.9327	20.7517	18.4703	18.4681	-0.08852	1.13073	0.779095	0.274328
m.22206	Pmi_637734_F	F117B_HUMAN_Protein_FAM217B			2.127	0.3916	1.16245	1	1	1	0	16.0096	17.3213	14.9834	15.6674	15.597	15.8662	16.2342	15.5083	15.7035	15.9662	15.6294	-1.24951	-0.103235	0.285208	0.688841
m.49129	73558	73558|g.49129 type:complete len:102 gc:universal 73558:2002-1697(-)			1.932	0.2842	1.01883	1	1	1	0	14.3585	14.2448	14.0691	14.6573	13.963	14.3571	14.7561	15.47	14.7266	18.4236	15.7796	-0.0718717	1.44887	0.774851	0.317374
PMI_022691		XP_022110270.1 centrosomal protein CEP57L1-like [Acanthaster planci] (id=67.79%; len=503; e=0.00E+00)			3.721	0.7388	3.13291	1	1	1	0	15.2925	18.2407	14.7574	14.9429	14.7327	15.0286	14.9874	14.814	15.25	15.1031	14.8918	-1.95558	0.138352	0.41086	0.334202
m.19489; m.15121	26064; Pmi_599720_W	XP_022093581.1 diphthine methyltransferase-like isoform X1 [Acanthaster planci] (id=64.14%; len=145; e=2.98E-53) ; WDR85_MOUSE_WD_repeat-containing_protein_85	1122	1	3.288	0.504	1.4938	1	1	0	0	17.5325	19.5013	17.5308	16.9247	17.2252	16.6746	16.7887	16.508	15.9441	17.3924	16.5118	-1.29	-0.0409816	0.410023	0.932086
PMI_002978		XP_022100479.1 mitogen-activated protein kinase kinase kinase 10-like isoform X1 [Acanthaster planci] (id=55.94%; len=286; e=2.83E-93)			4.913	0.6717	1.24943	4	3	1	0	19.0985	21.9526	18.9356	19.1853	18.7759	18.776	18.5873	18.4971	18.5344	18.7985	18.8938	-1.5599	0.122087	0.470837	0.421175
m.25036	35888	XP_022093303.1 helicase SRCAP-like isoform X2 [Acanthaster planci] (id=82.70%; len=237; e=2.13E-97)			3.628	0.6684	1.12021	2	2	1	0	16.2533	18.4139	15.7541	16.2789	16.011	15.9336	15.8722	15.8965	16.1153	15.9586	15.8511	-1.31893	0.0742706	0.434035	0.436673
PMI_018474		XP_022105975.1 NADH dehydrogenase [ubiquinone] 1 beta subcomplex subunit 3-like [Acanthaster planci] (id=75.47%; len=53; e=4.11E-21)			2.5	0.7504	2.74583	1	1	1	0	14.8137	14.3678	14.0868	19.5607	14.9215	15.9853	15.8039	16.2491	19.8661	14.5887	15.5321	1.59885	0.649536	0.447315	0.728367
m.10617	Pmi_562011_Z	ZN668_BOVIN_Zinc_finger_protein_668			1.114	0.2962	1.97246	1	1	1	0	15.924	19.5778	15.453	16.3673	15.146	15.3456	15.4499	15.2481	15.3319	15.1247	15.4311	-2.09545	-0.0519977	0.451536	0.657757
PMI_001628		XP_022083287.1 uncharacterized protein LOC110975265 [Acanthaster planci] (id=62.40%; len=952; e=0.00E+00)			1.802	0.3047	0.53157	1	1	1	0	15.9128	17.8656	15.9599	15.3153	16.0787	15.974	16.2056	15.8731	15.9282	16.3244	15.9338	-1.10455	0.0445466	0.454173	0.800306
m.24940	35751	XP_022105613.1 cholinesterase 1-like [Acanthaster planci] (id=62.92%; len=267; e=7.70E-104)			3.087	0.6074	1.41221	2	2	0	0	17.826	19.9304	17.6196	17.8507	17.5741	17.9061	17.8126	17.8139	17.9142	17.8174	17.8651	-1.19674	0.0213673	0.458253	0.635675
PMI_023932		XP_022103709.1 adenylate cyclase type 10-like isoform X2 [Acanthaster planci] (id=83.15%; len=279; e=1.17E-139)			2	0.289	0.758039	1	1	1	0	16.4295	20.5597	16.3975	16.997	16.3664	16.1773	16.0225	15.955	16.0211	16.0099	16.1541	-1.90758	0.0100715	0.524382	0.907085
m.23128	32403	XP_022107408.1 conserved oligomeric Golgi complex subunit 8-like [Acanthaster planci] (id=39.50%; len=119; e=1.10E-04)			4.247	0.4029	0.985578	1	1	1	0		11.3005	10.0174	9.96122	10.1704					10.0705		-1.25085
m.12517; PMI_004268; PMI_027775	Pmi_579720_M; None; None	MYPH_ECHGR_Myophilin; XP_022109725.1 muscle-specific protein 20-like [Acanthaster planci] (id=65.67%; len=201; e=3.66E-86) ; XP_022109725.1 muscle-specific protein 20-like [Acanthaster planci] (id=62.30%; len=183; e=3.36E-72)	1314	1	2.352	0.4813	1.32209	1	1	0	0	17.0352	17.2537	16.8717	16.8913	16.9973	17.5247	18.1177	18.2057	17.0106	16.935	16.9189	-0.224386	-0.994551	0.261603	0.0411719
m.22359	Pmi_638450_I	ITB1_CHICK_Integrin_beta-1			2.419	0.5726	1.05469	1	1	1	0	15.6686	16.2108	15.8611	15.7763	15.7897	15.8104	16.6722	16.5149	15.6682	15.9674	14.3846	-0.13064	-0.992472	0.714114	0.167815
PMI_012441		XP_022102017.1 anthocyanidin reductase ((2S)-flavan-3-ol-forming)-like [Acanthaster planci] (id=79.61%; len=456; e=0.00E+00)			6.381	0.79	0.516305	19	16	0	16	22.3955	22.0314	22.1425	22.197	22.3331	22.8458	23.5502	23.6675	22.5533	22.3954	22.1576	0.0107615	-0.985736	0.962909	0.0445017
PMI_008724		XP_022108860.1 fatty acid-binding protein, liver-like [Acanthaster planci] (id=81.16%; len=138; e=1.61E-71)			3.996	0.6529	1.1135	2	2	2	0	18.3427	18.6186	18.2924	18.1035	18.1726	18.676	19.3676	19.3584	17.9858	18.2585	18.2449	-0.291096	-0.970922	0.249264	0.0377061
m.11176; PMI_027108	Pmi_567970_F; None	FCN2_PIG_Ficolin-2; XP_022101894.1 techylectin-5A-like isoform X1 [Acanthaster planci] (id=57.05%; len=319; e=4.31E-110)	1295	2	3.681	0.4675	0.721682	2	2	0	0	16.3483	16.3235	16.0439	16.1551	16.0648	16.4712	16.8866	17.1329	16.0391	16.1048	15.4539	-0.247952	-0.964372	0.0115494	0.0272843
PMI_014110		XP_022088338.1 troponin T, cardiac muscle isoforms-like isoform X2 [Acanthaster planci] (id=66.34%; len=101; e=3.30E-34)			1.777	0.3185	1.26107	1	1	1	0	16.8194	17.0656	16.9702	15.8705	16.6361	17.5307	17.526	17.573	15.8716	16.7835	17.0956	-0.450235	-0.959651	0.301915	0.120269
PMI_025151		XP_022102669.1 E3 ubiquitin-protein ligase NRDP1-like [Acanthaster planci] (id=96.55%; len=319; e=0.00E+00)			5.619	0.73	1.14784	1	1	1	0	15.5245	15.7311	14.7681	15.4381	15.476	16.3741	16.404	16.1179	15.2925	15.3136	15.4504	-0.400423	-0.946489	0.221274	0.00243945
m.32379	48436	XP_022108277.1 tropomyosin isoforms c/e-like isoform X5 [Acanthaster planci] (id=83.88%; len=242; e=1.86E-133)			6.622	0.788	0.276601	70	30	0	11	25.2012	25.4365	25.2298	25.214	25.1116	25.7214	26.28	26.3724	25.179	25.2002	25.1657	-0.133753	-0.942948	0.449194	0.0431934
m.23223	32625	32625|g.23223 type:3prime_partial len:112 gc:universal 32625:64-396(+)			1.252	0.2955	0.089933	1	1	1	0	15.5884	15.8322	15.3414	15.837	17.1645	16.7226	17.2553	16.3268	15.1638	16.4635	15.8618	0.403966	-0.938545	0.538258	0.11923
m.36463; PMI_012159	54866; None	XP_022098558.1 out at first protein-like [Acanthaster planci] (id=82.70%; len=237; e=1.04E-139) ; XP_022098558.1 out at first protein-like [Acanthaster planci] (id=77.54%; len=285; e=1.25E-155)	723	1	2.057	0.4025	2.03472	1	1	0	0	17.0038	17.1508	16.8392	16.4618	16.6602	16.8826	17.4314	17.6908	16.5034	16.4564	16.2589	-0.42358	-0.928733	0.0486387	0.0492719
m.4893; PMI_008486	Pmi_473651_G; None	GELS1_LUMTE_Gelsolin-like_protein_1; XP_022111672.1 gelsolin-like protein 2, partial [Acanthaster planci] (id=88.66%; len=291; e=0.00E+00)	2390	5	4.753	0.7096	0.668135	13	6	0	0	21.6556	21.7783	21.7051	21.6438	21.6899	21.9971	22.6628	22.7696	21.5252	21.5189	21.604	-0.0373759	-0.927128	0.650907	0.0599844
m.30873; m.53149	Pmi_667932_L; 79287	LAMB1_HUMAN_Laminin_subunit_beta-1; XP_022099297.1 laminin subunit beta-1-like [Acanthaster planci] (id=93.06%; len=1514; e=0.00E+00)	705	11	5.339	0.7683	0.318524	13	11	0	5	19.9491	20.211	19.8013	19.6314	19.8015	20.4057	20.9102	20.9964	19.7647	20.0837	19.6912	-0.335298	-0.924227	0.196624	0.0186682
m.18725; PMI_024487	Pmi_621180_G; None	GLNA_SQUAC_Glutamine_synthetase,_mitochondrial; XP_022084225.1 glutamine synthetase-like [Acanthaster planci] (id=87.74%; len=367; e=0.00E+00)	158	3	3.593	0.6809	1.05737	5	3	0	2	19.7495	19.8743	19.2038	19.3007	19.3189	20.3141	20.3118	20.2496	19.0772	19.5133	19.5309	-0.537418	-0.918012	0.0278908	0.0232822
m.25004	Pmi_648852_G	GDIR2_BOVIN_Rho_GDP-dissociation_inhibitor_2			5.403	0.7675	1.34181	4	3	1	2	18.84	19.192	18.8471	18.8105	18.7854	19.2447	19.9713	20.0191	18.8597	18.9463	18.6788	-0.201652	-0.916759	0.45543	0.0562917
m.24413; PMI_026766; PMI_018354; m.20524; m.24412; m.24415	34857; None; None; Pmi_630220_S; 34856; 34858	XP_022108678.1 syntaxin-5-like [Acanthaster planci] (id=90.64%; len=342; e=0.00E+00) ; XP_022108678.1 syntaxin-5-like [Acanthaster planci] (id=88.03%; len=142; e=1.14E-81) ; XP_022108678.1 syntaxin-5-like [Acanthaster planci] (id=86.73%; len=113; e=1.99E-62) ; STX5_MOUSE_Syntaxin-5; XP_022108678.1 syntaxin-5-like [Acanthaster planci] (id=84.21%; len=114; e=1.94E-60) ; XP_022108678.1 syntaxin-5-li…	1554	1	3.34	0.4518	1.64087	1	1	0	0	17.8918	17.9222	17.6285	17.3652	17.4827	18.0486	18.6453	18.4118	17.602	17.2796	17.486	-0.414823	-0.912698	0.0282698	0.0179444
PMI_010952		KHJ93825.1 Actin [Oesophagostomum dentatum] (id=64.02%; len=214; e=5.70E-96)			2.694	0.5387	0.609491	8	3	1	2	21.1079	22.0494	20.857	20.903	20.9785	22.0987	22.3355	22.3094	21.4499	21.2583	21.3148	-0.665795	-0.906827	0.39074	0.000907358
m.21923	Pmi_636570_F	FREM2_HUMAN_FRAS1-related_extracellular_matrix_protein_1			3.022	0.7641	1.33771	1	1	1	0	15.3958	15.6879	15.241	15.5355	15.3877	15.8566	16.5968	16.7717	15.449	15.5552	15.5004	-0.153819	-0.906814	0.473119	0.0820985
m.31976; m.19335	47788; Pmi_624460_P	XP_022100389.1 PDZ and LIM domain protein 1-like isoform X3 [Acanthaster planci] (id=82.56%; len=367; e=0.00E+00) ; PDLI3_MOUSE_PDZ_and_LIM_domain_protein_3	2769	8	6.508	0.8063	0.805486	9	8	0	6	19.62	19.8784	19.5984	19.6415	19.7352	20.2201	20.7968	20.9121	19.7965	19.7826	19.6494	-0.0907965	-0.900196	0.608068	0.0465098
PMI_029039		ABZ04247.1 ribosomal protein rpl38 [Lineus viridis] (id=74.67%; len=75; e=5.30E-26)			4.432	0.724	1.19568	4	2	1	1	21.1552	21.163	20.845	21.1825	21.2871	22.1933	22.2335	22.2113	21.3566	21.3575	21.258	-0.0542107	-0.888651	0.723837	0.000453703
m.51638; m.51655; m.51652	77113; 77124; 77121	XP_022088422.1 uncharacterized protein LOC110978061 isoform X1 [Acanthaster planci] (id=77.06%; len=279; e=3.90E-145) ; XP_022088422.1 uncharacterized protein LOC110978061 isoform X1 [Acanthaster planci] (id=66.77%; len=331; e=3.52E-132) ; XP_022088423.1 uncharacterized protein LOC110978061 isoform X2 [Acanthaster planci] (id=78.01%; len=191; e=4.66E-98)	1893	1	2.693	0.6625	2.13025	1	1	0	0	14.9127	15.0173	14.4606	14.7004	15.3048	15.3547	16.0419	16.2322	14.5566	14.9832	15.4235	-0.143052	-0.888538	0.629316	0.072204
m.18895	Pmi_622250_Z	ZER1_HUMAN_Protein_zer-1_homolog			2.89	0.5837	0.802189	2	2	2	0	15.8998	16.5939	15.8936	17.0974	16.4125	17.4879	17.3643	17.4278	16.5881	16.2432	16.8635	0.220953	-0.86168	0.687168	0.036395
m.35994; PMI_004844	54239; None	XP_001178402.2 PREDICTED: uncharacterized protein LOC752329 [Strongylocentrotus purpuratus] (id=36.94%; len=111; e=1.16E-11) ; XP_001178402.2 PREDICTED: uncharacterized protein LOC752329 [Strongylocentrotus purpuratus] (id=33.88%; len=121; e=1.20E-11)	731	2	5.813	0.8123	0.649645	4	2	0	1	16.9329	17.0698	16.7254	16.7833	16.9629	17.7368	17.7729	17.789	17.013	16.7921	16.9889	-0.177467	-0.834907	0.179453	0.0051523
m.7695	12217	WP_029087763.1 EAL domain-containing protein [Brevundimonas aveniformis] (id=32.76%; len=58; e=2.00E+00)			2.684	0.3536	2.58492	1	1	1	0	17.4956	17.707	17.1259	17.7753	17.6313	18.6657	18.8428	19.102	18.4126	17.7069	17.9875	-0.0904572	-0.83449	0.714161	0.034464
m.32373	48430	XP_022108277.1 tropomyosin isoforms c/e-like isoform X5 [Acanthaster planci] (id=81.06%; len=227; e=5.48E-116)			6.622	0.788	0.689903	69	29	0	11	25.2468	25.4629	25.2781	25.2658	25.1722	25.6991	26.2139	26.2928	25.2226	25.2603	25.2422	-0.116178	-0.826945	0.468184	0.046681
PMI_025994; PMI_003493; m.18507	None; None; Pmi_620182_U	XP_022109361.1 upstream stimulatory factor 2-like isoform X2 [Acanthaster planci] (id=81.25%; len=304; e=2.01E-162) ; XP_022109361.1 upstream stimulatory factor 2-like isoform X2 [Acanthaster planci] (id=82.82%; len=262; e=3.57E-142) ; USF2_MOUSE_Upstream_stimulatory_factor_2	692	1	2.458	0.5464	1.91785	1	1	0	0	11.9783	12.9474	12.4878	11.9772	12.1239	12.7003	13.069	12.6593	11.5464	12.2844	12.1258	-0.266526	-0.823997	0.680053	0.0456917
PMI_005536		PIK44076.1 hypothetical protein BSL78_19064 [Apostichopus japonicus] (id=70.00%; len=70; e=3.03E-21)			4.116	0.6808	1.05956	4	2	2	0	20.2658	20.3659	20.0867	20.3062	20.6032	21.6091	21.7868	21.8408	20.8246	20.8876	21.0533	0.016197	-0.823724	0.926165	0.00108838
m.16970	Pmi_611390_T	TTC3_HUMAN_E3_ubiquitin-protein_ligase_TTC3			4.799	0.7151	1.18164	3	3	0	3	16.8409	16.9777	16.5192	16.4806	16.5668	17.0613	17.5254	17.6968	16.503	16.7209	16.5959	-0.387118	-0.821203	0.0802713	0.0385578
PMI_017487; PMI_020572; m.17170	None; None; Pmi_612830_H	XP_022109973.1 uncharacterized protein LOC110989705 [Acanthaster planci] (id=85.01%; len=427; e=0.00E+00) ; XP_022109973.1 uncharacterized protein LOC110989705 [Acanthaster planci] (id=67.38%; len=518; e=0.00E+00) ; HAUS6_HUMAN_HAUS_augmin-like_complex_subunit_6	2647	1	3.889	0.6981	0.461805	1	1	0	0	12.7801	12.5306	13.1186	12.8345	12.6329	13.0875	12.7497	12.2719	11.797	12.3944	11.4721	0.206664	-0.815162	0.356071	0.0868547
PMI_001278		XP_022089410.1 laminin subunit alpha-like isoform X1 [Acanthaster planci] (id=57.90%; len=2506; e=0.00E+00)			7.608	0.8293	0.650172	9	8	1	7	18.8854	19.0263	18.6165	18.8898	18.9878	19.4062	19.7162	19.7966	18.6576	19.0534	18.7756	-0.124452	-0.810766	0.414474	0.00833415
m.24962; PMI_020606	Pmi_648761_R; None	RAD21_HUMAN_Double-strand-break_repair_protein_rad21_homolog; XP_022103586.1 double-strand-break repair protein rad21 homolog isoform X1 [Acanthaster planci] (id=87.70%; len=561; e=0.00E+00)	1704	1	2.788	0.5312	1.66384	1	1	0	0	14.3849	14.3071	13.9861	13.5337	14.0616	14.3458	14.6514	14.5746	13.762	13.7763	13.6051	-0.485469	-0.809488	0.0917497	0.00353415
m.30869; PMI_020223	Pmi_667870_U; None	UBF1_HUMAN_Nucleolar_transcription_factor_1; XP_022091128.1 nucleolar transcription factor 1-like isoform X2 [Acanthaster planci] (id=82.65%; len=438; e=0.00E+00)	1209	1	3.103	0.6046	2.21827	1	1	0	0	17.1352	17.196	17.189	16.5213	16.7193	17.2295	17.5194	17.6521	16.6864	16.7351	16.573	-0.355716	-0.802195	0.212143	0.014071
m.14385; PMI_002975	Pmi_594370_G; None	GNAQ_MOUSE_Guanine_nucleotide-binding_protein_G(q)_subuni..CUT; BAO00909.1 guanine nucleotide-binding protein G(q) alpha [Patiria pectinifera] (id=83.07%; len=254; e=4.94E-140)	554	1	2.769	0.6399	1.63626	1	1	0	0	17.3248	17.3829	17.166	17.2748	17.0191	17.9757	18.2894	18.5264	17.7577	17.4435	17.2209	-0.200569	-0.789816	0.101302	0.0239616
m.51016	76436	XP_022093880.1 GRIP and coiled-coil domain-containing protein 2-like [Acanthaster planci] (id=71.00%; len=1786; e=0.00E+00)			4.401	0.6738	1.08652	7	7	1	6	19.2937	19.6981	19.1992	19.3729	19.3064	19.9342	20.5382	20.6821	19.4823	19.584	19.7208	-0.203059	-0.789091	0.493188	0.0644978
PMI_007350; m.50673	None; 75864	XP_022096135.1 uncharacterized protein LOC110982186 [Acanthaster planci] (id=73.50%; len=200; e=2.10E-92) ; XP_022096135.1 uncharacterized protein LOC110982186 [Acanthaster planci] (id=77.00%; len=187; e=1.09E-90)	265	1	5.235	0.6627	2.16053	1	1	0	0	17.7543	17.5878	17.5368	17.5047	17.6928	17.9875	18.4066	18.4366	17.4976	17.4836	17.4852	-0.0929581	-0.788134	0.457502	0.0320942
PMI_023109		XP_022101275.1 fibulin-2-like [Acanthaster planci] (id=52.59%; len=251; e=2.02E-67)			1.04	0.3087	0.901848	1	1	1	0	18.11	17.6715	18.0359	17.4349	17.212	18.0326	17.9715	18.359	17.5142	17.3328	17.1726	-0.329847	-0.781135	0.394207	0.00814089
PMI_014671		XP_022091860.1 uncharacterized protein LOC110979958 isoform X1 [Acanthaster planci] (id=62.13%; len=2036; e=0.00E+00)			2.749	0.6399	1.3279	1	1	1	0	13.7708	14.1528	13.7554	13.6346	13.5567	14.6994	14.2024	14.0781	13.5653	13.3054	13.7751	-0.312868	-0.778026	0.332177	0.03369
m.32365	48422	XP_022108277.1 tropomyosin isoforms c/e-like isoform X5 [Acanthaster planci] (id=83.47%; len=242; e=5.55E-132)			6.622	0.788	0.276601	81	30	0	11	25.6196	25.8273	25.616	25.6012	25.5423	26.026	26.5239	26.5823	25.5809	25.6012	25.6223	-0.13698	-0.775898	0.405923	0.0474654
m.5979	Pmi_496100_P	PPBT_BOVIN_Alkaline_phosphatase,_tissue-nonspecific_isozyme			2.608	0.5306	1.5442	2	2	1	1	17.2363	18.6766	17.1349	17.0659	17.2534	17.3739	17.9296	17.8462	16.9854	16.9245	16.913	-0.805052	-0.775572	0.463858	0.0442715
m.28408; m.27961; PMI_018288	Pmi_660480_n; 40975; None	no_annot; XP_022101353.1 uncharacterized protein LOC110984987 [Acanthaster planci] (id=69.51%; len=305; e=3.17E-148) ; XP_022101353.1 uncharacterized protein LOC110984987 [Acanthaster planci] (id=70.51%; len=156; e=1.26E-75)	1670	1	3.446	0.6915	1.13484	1	1	0	0	14.6392	15.3488	14.5601	15.2165	15.2837	15.5799	16.0945	16.832	15.9686	15.6225	14.5894	0.0261006	-0.775327	0.956811	0.233321
PMI_021197; m.22856; m.42764	None; Pmi_640610_S; 64351	sp|F7J220.1|SRCR1_PATPE RecName: Full=Scavenger receptor cysteine-rich domain superfamily protein; Short=ApSRCR1; Flags: Precursor (id=68.56%; len=668; e=0.00E+00) ; SRCR1_ASTPE_Scavenger_receptor_cysteine-rich_domain_super..CUT; sp|F7J220.1|SRCR1_PATPE RecName: Full=Scavenger receptor cysteine-rich domain superfamily protein; Short=ApSRCR1; Flags: Precursor (id=96.52%; len=1119; e=0.00E+00)	2443	1	1.061	0.3478	0.359315	1	1	0	0	16.9188	16.9658	16.1687	16.7905	16.7471	17.5372	17.7959	17.9292	17.2672	16.8375	16.863	-0.373556	-0.764866	0.201974	0.0143308
PMI_014638; m.7578	None; Pmi_523810_F	XP_022097489.1 fibrillin-1-like [Acanthaster planci] (id=70.26%; len=269; e=7.60E-114) ; FBN1_PIG_Fibrillin-1	2315	1	1.978	0.5713	1.81679	1	1	0	0	13.9234	14.3344	14.1566	14.0307	14.0982	14.4986	15.0307	15.3706	14.2002	14.3506	14.0709	-0.0337538	-0.759384	0.896693	0.0844
m.13826; PMI_012962; PMI_009914	Pmi_590440_S; None; None	STK19_MOUSE_Serine/threonine-protein_kinase_19; XP_022102398.1 serine/threonine-protein kinase 19-like [Acanthaster planci] (id=80.16%; len=252; e=1.37E-143) ; XP_022102398.1 serine/threonine-protein kinase 19-like [Acanthaster planci] (id=87.18%; len=234; e=6.05E-149)	193	1	2.723	0.6078	1.13049	1	1	0	0	11.4252	11.4336		11.8436	11.9904	13.1868	13.292	12.9826	12.5442	12.2512	12.4062	0.487595	-0.753256	0.0942666	0.00378644
m.12533; PMI_017419; PMI_017191	Pmi_579991_K; None; None	K1609_CHICK_TLD_domain-containing_protein_KIAA1609_homolog; XP_022080226.1 TLD domain-containing protein 1-like [Acanthaster planci] (id=79.52%; len=503; e=0.00E+00) ; XP_022080226.1 TLD domain-containing protein 1-like [Acanthaster planci] (id=76.03%; len=363; e=0.00E+00)	976	3	4.004	0.6866	0.684385	6	3	0	0	19.7406	19.8681	19.3071	19.4897	19.5768	20.2283	20.3345	20.2955	19.6079	19.3877	19.6217	-0.346486	-0.746962	0.0433909	0.00448306
m.44860; PMI_014325; m.31056	67183; None; Pmi_668230_I	XP_022090698.1 integrin alpha-7-like [Acanthaster planci] (id=70.72%; len=847; e=0.00E+00) ; XP_022090698.1 integrin alpha-7-like [Acanthaster planci] (id=56.85%; len=540; e=5.15E-173) ; ITA6_CHICK_Integrin_alpha-6	1827	2	2.839	0.5414	1.4279	2	2	0	0	17.7915	17.8745	17.0097	17.8181	18.3709	18.9279	19.0319	18.8746	18.0807	18.1535	18.3654	-0.100069	-0.744918	0.824263	0.00419699
m.17267	Pmi_613310_E	ELAV4_HUMAN_ELAV-like_protein_4			4.515	0.713	0.995707	11	9	0	9	22.3913	22.4544	22.1916	22.3584	22.3835	22.8311	23.2619	23.2257	22.5148	22.315	22.2605	-0.111658	-0.74281	0.204617	0.016427
m.4555; m.28796	7799; Pmi_661510_E	XP_022095025.1 epidermal growth factor receptor kinase substrate 8-like protein 2 isoform X2 [Acanthaster planci] (id=90.16%; len=122; e=4.22E-68) ; EPS8_MOUSE_Epidermal_growth_factor_receptor_kinase_substrate_8	1354	1	3.243	0.5945	2.48186	1	1	0	0	12.3882	12.0326	11.9235	11.4607	11.4203	12.8047	12.6026	12.534	12.3317	11.4851		-0.608913	-0.738715	0.102396	0.323221
m.16810	Pmi_610370_S	SCRY4_OCTDO_S-crystallin_4			3.972	0.5788	1.17793	3	3	0	3	18.9785	18.936	18.9561	18.8335	18.9275	19.2369	19.7155	19.6633	18.8129	18.8127	18.7973	-0.0515469	-0.730915	0.316488	0.0402781
m.47983; PMI_022902	71769; None	XP_002737496.1 PREDICTED: calcium-regulated heat stable protein 1-like isoform X1 [Saccoglossus kowalevskii] (id=49.63%; len=135; e=4.12E-35) ; XP_002737496.1 PREDICTED: calcium-regulated heat stable protein 1-like isoform X1 [Saccoglossus kowalevskii] (id=49.63%; len=135; e=3.67E-35)	2686	4	5.701	0.75	0.574134	8	4	0	1	20.0593	20.0701	19.9828	19.9265	20.0535	20.9355	21.1462	21.0273	20.2886	20.2823	20.3489	-0.0770533	-0.729745	0.168408	0.00341284
PMI_012626		XP_022102595.1 hephaestin-like protein [Acanthaster planci] (id=70.86%; len=573; e=0.00E+00)			4.305	0.7756	1.04782	2	2	0	2	17.3944	17.5126	16.8519	17.1102	17.2007	17.8943	18.5562	18.5242	17.671	17.6759	17.444	-0.399226	-0.727937	0.047373	0.0642518
PMI_004043		XP_022079408.1 steroid receptor RNA activator 1-like [Acanthaster planci] (id=58.11%; len=370; e=6.24E-124)			4.91	0.7012	1.31621	1	1	1	0	15.7486	15.9459	15.6421	15.4215	15.3848	16.9543	16.7221	16.9437	15.8754	16.1857	16.3836	-0.36448	-0.725155	0.0894444	0.0225309
m.4634; m.3356	7905; Pmi_422211_n	ELT88809.1 hypothetical protein CAPTEDRAFT_217367, partial [Capitella teleta] (id=37.50%; len=120; e=1.05E-17) ; no_annot	823	1	2.267	0.3547	1.26734	1	1	0	0	16.4886	17.7797	16.167	17.1725	17.5451	18.9395	19.1657	19.0177	18.3352	18.1968	18.4336	-0.172622	-0.719098	0.844286	0.00167253
m.6027; PMI_028662; PMI_008390	Pmi_497180_E; None; None	EFHD2_RAT_EF-hand_domain-containing_protein_D2; XP_022090195.1 EF-hand domain-containing protein D2-like [Acanthaster planci] (id=80.83%; len=193; e=4.12E-89) ; XP_022090195.1 EF-hand domain-containing protein D2-like [Acanthaster planci] (id=91.19%; len=193; e=1.27E-109)	21	3	4.431	0.6488	0.992348	3	3	0	0	16.8865	18.8018	17.1611	16.9618	16.9503	17.2378	17.5746	17.5194	16.4608	16.8516	16.8702	-0.819744	-0.716435	0.548935	0.0150774
m.31416; PMI_008722	Pmi_669291_H; None	H2A_PARLI_Histone_H2A; XP_022108863.1 late histone H2A.2.2-like [Acanthaster planci] (id=87.12%; len=132; e=8.33E-68)	132	2	3.425	0.6067	0.083512	5	3	0	2	21.4113	21.5646	21.0034	20.8373	21.0223	21.9028	21.8061	21.7641	20.8557	21.1862	21.2869	-0.533608	-0.714699	0.0265207	0.0233188
m.17091; PMI_023828	Pmi_612300_R; None	RET2_HUMAN_Retinol-binding_protein_2; XP_022087608.1 serum response factor-binding protein 1-like [Acanthaster planci] (id=58.58%; len=169; e=2.61E-63)	673	1	3.197	0.5602	1.71412	1	1	0	0	16.0762	16.0926	15.8282	15.9221	16.1582	16.5156	17.1243	17.1795	16.3823	16.1144	16.1822	-0.114851	-0.713512	0.362408	0.0640354
PMI_008108		XP_022111455.1 uncharacterized protein LOC110990674 [Acanthaster planci] (id=43.32%; len=367; e=1.21E-55)			6.915	0.8477	0.180165	18	4	1	3	22.945	22.9173	22.6877	22.853	22.907	23.6981	23.3675	23.4813	22.5805	22.8022	23.0588	-0.115233	-0.70178	0.219538	0.0177567
PMI_012847		XP_022107166.1 pyridine nucleotide-disulfide oxidoreductase domain-containing protein 2-like isoform X2 [Acanthaster planci] (id=82.27%; len=643; e=0.00E+00)			5.042	0.6896	0.634193	4	4	0	1	20.944	20.8388	20.8556	20.3238	20.68	21.19	21.5818	21.0336	20.3832	20.6193	20.6993	-0.271613	-0.701213	0.219785	0.0300887
m.20416	Pmi_629801_R	RASL1_HUMAN_RasGAP-activating-like_protein_1			3.511	0.5891	0.617607	6	4	0	4	18.773	18.8732	18.6782	18.7945	18.9274	19.537	19.6763	19.6386	18.9337	18.815	19.0059	-0.0230515	-0.699073	0.809679	0.000803024
m.32366	48424	XP_022108251.1 tropomyosin-like isoform X2 [Acanthaster planci] (id=76.03%; len=242; e=7.26E-120)			6.622	0.788	0.485465	82	30	0	21	25.6233	25.8194	25.6171	25.6054	25.5471	25.9811	26.442	26.4924	25.5874	25.6094	25.6314	-0.131478	-0.695751	0.400418	0.0497579
m.25570; m.5994; PMI_021735	Pmi_650761_A; 9911; None	ACE_CHICK_Angiotensin-converting_enzyme; XP_022084569.1 angiotensin-converting enzyme-like isoform X2 [Acanthaster planci] (id=80.74%; len=135; e=3.79E-74) ; XP_022084568.1 angiotensin-converting enzyme-like isoform X1 [Acanthaster planci] (id=81.63%; len=637; e=0.00E+00)	2471	1	3.702	0.6691	1.16395	1	1	0	0	16.626	16.765	16.725	15.9279	16.2107	16.296	17.2005	17.2004	16.092	16.4471	16.0799	-0.407638	-0.692645	0.21792	0.135518
m.12679; PMI_023637	Pmi_581210_S; None	SEPT9_HUMAN_Septin-9; XP_022095482.1 neuronal-specific septin-3-like isoform X2 [Acanthaster planci] (id=87.42%; len=294; e=0.00E+00)	2529	1	2.25	0.5431	2.88119	1	1	0	0	14.8558	15.525	15.6557	15.383	15.8868	15.6966	16.1287	16.251	14.9975	15.7434	15.2813	0.45145	-0.684698	0.3852	0.0713236
m.24783	Background_P	TPM_BRABE_Tropomyosin			6.622	0.788	0.485465	80	29	0	11	25.6538	25.8475	25.6531	25.6409	25.5875	26.008	26.4683	26.5138	25.614	25.6469	25.6785	-0.1235	-0.683544	0.417023	0.0498734
m.1141	2183	XP_020970039.1 putative disease resistance protein At3g14460 [Arachis ipaensis] (id=27.08%; len=96; e=3.10E+00)			2.273	0.3669	0.174087	1	1	1	0	17.2811	16.9478	17.5706	16.2247	17.1129	17.3125	17.0918	17.6127	16.3562	16.945	16.7051	-0.145101	-0.67024	0.760422	0.0432318
m.35454; PMI_023172	53393; None	XP_022109142.1 coiled-coil domain-containing protein 13-like [Acanthaster planci] (id=79.38%; len=354; e=0.00E+00) ; XP_022109142.1 coiled-coil domain-containing protein 13-like [Acanthaster planci] (id=79.63%; len=648; e=0.00E+00)	1853	1	3.766	0.6187	0.562957	1	1	0	0	14.8801	14.2214	15.2837	14.6977	14.6043	15.3209	15.6068	15.2542	14.7627	14.3689	15.0413	0.311098	-0.66966	0.51652	0.0546636
PMI_024207; m.20284; m.34303	None; Pmi_628822_W; 51514	XP_022108072.1 uncharacterized protein LOC110988646 isoform X2 [Acanthaster planci] (id=74.86%; len=175; e=2.34E-93) ; WBS27_HUMAN_Williams-Beuren_syndrome_chromosomal_region_2..CUT; XP_022108071.1 uncharacterized protein LOC110988646 isoform X1 [Acanthaster planci] (id=61.93%; len=218; e=3.87E-94)	498	3	5.96	0.7525	0.462642	3	3	0	0	17.2837	17.389	17.0454	17.3207	17.2381	18.2774	18.4419	17.9264	17.4128	17.6439	17.5817	-0.134968	-0.66913	0.259193	0.0318353
PMI_017284; PMI_025564; m.13241	None; None; Pmi_586170_P	XP_022099981.1 phospholipid scramblase 1-like [Acanthaster planci] (id=78.97%; len=252; e=1.18E-139) ; XP_022099981.1 phospholipid scramblase 1-like [Acanthaster planci] (id=89.63%; len=241; e=1.11E-161) ; PLS2_BOVIN_Phospholipid_scramblase_2	395	2	2.588	0.5174	0.44983	3	2	0	0	20.2792	20.3788	20.1702	19.8172	19.9801	20.6194	20.8045	20.7122	20.0427	19.9838	20.126	-0.339881	-0.661205	0.0645544	0.000822722
PMI_012053; m.24457	None; Pmi_646794_T	XP_022084620.1 general transcription factor IIE subunit 2-like [Acanthaster planci] (id=88.15%; len=287; e=0.00E+00) ; T2EB_BOVIN_General_transcription_factor_IIE_subunit_2	2542	4	4.03	0.583	0.728059	4	4	0	0	19.6447	19.8542	19.5914	19.5895	19.6684	20.4731	20.6827	20.1072	19.7285	19.7053	19.8469	-0.13303	-0.660796	0.416215	0.0511771
PMI_022659; m.8611	None; Pmi_537530_T	XP_022094501.1 trafficking protein particle complex subunit 2-like protein [Acanthaster planci] (id=100.00%; len=138; e=1.33E-97) ; TPC2L_SALSA_Trafficking_protein_particle_complex_subunit_2-l..CUT	1320	1	2.558	0.751	2.47952	1	1	0	0	14.7098	14.6276	14.4924	14.3517	14.3748	15.2357	15.1552	15.2368	14.5252	14.6387	14.489	-0.262374	-0.658245	0.0260733	0.000708543
PMI_021422		XP_022111455.1 uncharacterized protein LOC110990674 [Acanthaster planci] (id=47.69%; len=346; e=1.55E-66)			6.226	0.7091	0.180165	20	4	1	3	23.0338	23.0061	22.8088	22.9265	22.9735	23.7228	23.3935	23.5017	22.641	22.88	23.1288	-0.117034	-0.656066	0.131366	0.0230825
PMI_028032		XP_022105185.1 RNA-binding protein MEX3B-like [Acanthaster planci] (id=90.02%; len=531; e=0.00E+00)			4.785	0.7456	0.893874	5	4	4	0	19.7319	19.9103	19.4574	19.3561	19.4199	19.9294	19.935	20.0304	19.3788	19.3585	19.19	-0.409975	-0.655836	0.108354	0.00208448
m.27521; m.14307	40046; Pmi_593830_S	XP_022080178.1 alpha-N-acetylgalactosaminide alpha-2,6-sialyltransferase 1-like [Acanthaster planci] (id=71.92%; len=374; e=0.00E+00) ; SIA7B_CHICK_Alpha-N-acetylgalactosaminide_alpha-2,6-sialy..CUT	2708	2	3.685	0.6673	1.83458	2	2	0	1	16.7346	16.6248	16.7108	16.7659	16.7582	17.6295	17.7168	17.4374	16.8105	16.9792	17.0316	0.0652611	-0.654096	0.434408	0.00404533
PMI_000136		XP_022089410.1 laminin subunit alpha-like isoform X1 [Acanthaster planci] (id=79.08%; len=1912; e=0.00E+00)			7.608	0.8293	0.650172	7	6	0	6	17.9998	18.2135	17.9528	18.2492	18.2267	18.5686	19.0098	19.1353	18.0168	18.6395	18.0964	0.0362895	-0.65368	0.819652	0.0670745
m.9092; m.23991	14064; Pmi_644911_S	XP_022087051.1 serine/threonine-protein kinase 11-interacting protein-like isoform X3 [Acanthaster planci] (id=85.89%; len=241; e=3.62E-135) ; S11IP_CHICK_Serine/threonine-protein_kinase_11-interacting_protein	2448	1	1.685	0.5596	0.660218	1	1	0	0	10.2918	11.1103	11.6333	10.9551	10.8829	11.411	11.069	11.3268	10.4336	10.957	10.4644	0.456073	-0.650595	0.452386	0.0404804
PMI_028387; m.34433; m.34432	None; 51731; 51730	XP_022101371.1 uncharacterized protein LOC110985003 isoform X3 [Acanthaster planci] (id=50.24%; len=205; e=3.01E-54) ; XP_022101355.1 uncharacterized protein LOC110984989 [Acanthaster planci] (id=59.18%; len=294; e=1.67E-120) ; XP_022101355.1 uncharacterized protein LOC110984989 [Acanthaster planci] (id=59.86%; len=294; e=5.40E-121)	10	2	4.003	0.7845	0.777588	2	2	0	2	16.7541	16.8409	16.565	16.3893	16.7484	17.0563	17.629	16.9935	16.3628	16.5489	16.8201	-0.229899	-0.648996	0.147124	0.0643409
m.33177	Pmi_4344260_	NGDN_MOUSE_Neuroguidin			2.082	0.6628	1.80534	1	1	1	0	13.8647	14.4994	13.3203	13.8788	13.7593	14.6811	14.5886	14.7719	13.9627	13.9685	14.1648	-0.529212	-0.648526	0.308474	0.00191687
PMI_028130		XP_022095899.1 contactin-2-like isoform X1 [Acanthaster planci] (id=63.27%; len=147; e=3.47E-51)			4.366	0.7064	1.39472	2	2	1	0	19.3945	19.9274	19.1098	18.4011	18.6995	19.1749	19.6711	18.7916	17.7892	18.7763	19.1478	-0.92418	-0.64143	0.101995	0.26359
PMI_030379		XP_028412342.1 uncharacterized protein LOC114535155 [Dendronephthya gigantea] (id=53.77%; len=424; e=8.58E-148)			1.157	0.2748	0.098294	1	1	1	0	15.8743	15.765	16.0181	15.8974	15.9786	16.4257	17.4429	17.1372	16.5476	16.2885	16.2547	0.145089	-0.638292	0.165706	0.159709
PMI_025424		XP_022096135.1 uncharacterized protein LOC110982186 [Acanthaster planci] (id=64.30%; len=759; e=0.00E+00)			3.364	0.6345	1.07049	3	3	0	2	18.0758	19.3216	17.8692	18.0451	17.9882	18.4865	18.7723	18.9319	18.1899	18.0911	18.0275	-0.73115	-0.627419	0.44824	0.0290781
m.22229; PMI_007245	Pmi_637821_H; None	H2AV_STRPU_Histone_H2A.V; XP_023227341.1 histone H2A.V-like [Centruroides sculpturatus] (id=98.80%; len=167; e=2.91E-111)	2862	3	5.184	0.6159	1.1258	5	3	0	0	20.3809	19.816	20.2444	20.3475	20.1914	20.7928	20.992	21.0274	20.4181	20.3132	20.2022	0.16262	-0.626222	0.667124	0.0031011
PMI_005498		XP_022106649.1 ankyrin and armadillo repeat-containing protein-like [Acanthaster planci] (id=91.40%; len=535; e=0.00E+00)			4.079	0.8134	1.56905	1	1	1	0	14.5009	14.2363	14.1685	14.2133	14.3912	14.5082	14.9537	14.9063	14.066	14.2561	14.1711	-0.110953	-0.624968	0.552555	0.0341168
PMI_009535		XP_022087649.1 phosphatidylinositol transfer protein beta isoform-like [Acanthaster planci] (id=51.84%; len=272; e=2.76E-84)			3.746	0.7074	0.772529	5	2	2	0	18.1283	17.3332	17.674	18.114	17.7903	18.4672	18.549	18.9648	18.2916	18.0245	17.7927	0.128681	-0.624042	0.802642	0.041874
m.16636; PMI_001669	Pmi_609430_H; None	HXK2_HUMAN_Hexokinase-2; XP_022097740.1 hexokinase-2-like isoform X3 [Acanthaster planci] (id=83.64%; len=440; e=0.00E+00)	2259	5	3.505	0.6441	1.02187	5	5	0	3	18.6007	18.81	18.6247	18.544	18.5028	18.9632	19.368	19.2985	18.3885	18.5877	18.7863	-0.148134	-0.62239	0.374791	0.0217145
PMI_019635; PMI_007650		XP_022081931.1 SH3 domain-binding glutamic acid-rich-like protein 3 [Acanthaster planci] (id=77.78%; len=90; e=7.39E-46) ; XP_022081931.1 SH3 domain-binding glutamic acid-rich-like protein 3 [Acanthaster planci] (id=80.28%; len=71; e=7.27E-36)	300	4	4.533	0.7505	0.934084	6	4	0	0	20.7439	20.951	20.8328	20.9197	20.8777	21.0792	21.588	21.655	20.8442	20.9266	20.6921	0.0292814	-0.61974	0.825505	0.0618676
PMI_002246; m.1130; PMI_018543	None; Pmi_237420_n; None	XP_022098806.1 kinesin-like protein KIN-14M [Acanthaster planci] (id=86.49%; len=918; e=0.00E+00) ; no_annot; XP_022098806.1 kinesin-like protein KIN-14M [Acanthaster planci] (id=81.34%; len=686; e=0.00E+00)	2243	1	2.695	0.3328	1.40148	2	1	0	0	20.55	20.5037	20.645	19.8582	20.1648	20.5945	20.4896	19.8864	19.2384	19.7654	20.1121	-0.304233	-0.618208	0.314922	0.141423
m.22282	Pmi_638150_S	SPG20_BOVIN_Spartin			4.686	0.7531	1.63882	3	3	1	2	16.6353	16.5605	16.3585	16.4126	16.5296	17.3532	17.463	17.2057	16.6579	16.7662	16.7619	-0.164337	-0.611949	0.0794489	0.00596928
m.36808; PMI_011044	55474; None	XP_022089581.1 dynein light chain LC6, flagellar outer arm-like isoform X1 [Acanthaster planci] (id=89.08%; len=119; e=4.62E-73) ; XP_022089581.1 dynein light chain LC6, flagellar outer arm-like isoform X1 [Acanthaster planci] (id=89.92%; len=119; e=1.61E-75)	2026	6	6.668	0.8288	0.25447	17	6	0	3	23.1807	23.312	23.1075	23.1125	23.2439	23.8985	23.9768	23.875	23.3997	23.2656	23.2519	-0.0917096	-0.611055	0.370985	0.000881154
m.32143; m.24159	Pmi_671240_M; 34246	MCM3A_MOUSE_80_kDa_MCM3-associated_protein; XP_022083515.1 germinal-center associated nuclear protein-like [Acanthaster planci] (id=74.73%; len=649; e=0.00E+00)	1243	1	2.553	0.405	0.342191	1	1	0	0	14.9226	14.7061	14.4456	14.5817	15.3732	15.625	15.5165	15.584	14.8842	14.9964	15.0237	-0.0141412	-0.607095	0.966876	0.000517904
m.27762	Pmi_658311_n	no_annot			3.972	0.6292	1.57067	1	1	1	0	14.2523	14.4171	13.9336	14.3194	14.1427	15.3842	14.5845	14.5902	14.5241	14.1227	14.1098	-0.202823	-0.600797	0.23992	0.138123
m.5355	Pmi_483071_n	no_annot			1.627	0.3755	1.88763	3	1	1	0	20.6225	20.9049	20.4651	20.4347	20.4919	21.1593	21.2267	21.2351	20.758	20.5998	20.4935	-0.299768	-0.589964	0.276656	0.0108994
m.53619	79847	XP_022092737.1 gelsolin-like protein 2 [Acanthaster planci] (id=80.66%; len=362; e=0.00E+00)			5.635	0.8054	0.205585	21	12	1	11	21.9441	21.9798	21.9412	21.848	21.9033	22.0602	22.5554	22.6652	21.8167	21.8835	21.8136	-0.0644069	-0.589005	0.141354	0.0848435
m.29062	Pmi_662400_R	RB15B_MOUSE_Putative_RNA-binding_protein_15B			2.202	0.401	0.564246	1	1	1	0	14.7432	14.7792	14.7494	14.5315	14.7011	15.0665	15.2355	15.225	14.5831	14.755	14.4306	-0.100513	-0.586097	0.264872	0.0103235
PMI_004849		XP_022111319.1 protein BUD31 homolog [Acanthaster planci] (id=97.22%; len=144; e=1.68E-99)			3.807	0.6323	0.211088	3	2	0	2	18.0841	18.2671	17.5264	17.894	18.1335	18.486	18.6939	18.5714	18.119	17.9922	17.8987	-0.324276	-0.580427	0.207431	0.00274819
m.16697; PMI_019053	Pmi_609840_n; None	no_annot; XP_022110689.1 LOW QUALITY PROTEIN: vegetative cell wall protein gp1-like [Acanthaster planci] (id=71.15%; len=104; e=2.40E-28)	373	2	5.346	0.7295	1.10136	3	2	0	0	18.8999	18.7912	18.1944	18.5866	18.4848	19.4826	19.4087	19.4936	19.0092	18.6321	19.0269	-0.42361	-0.572232	0.0542822	0.0421485
m.31135; PMI_004436	46513; None	XP_022086719.1 transcriptional regulator ATRX-like isoform X2 [Acanthaster planci] (id=61.96%; len=1120; e=0.00E+00) ; XP_022086718.1 transcriptional regulator ATRX-like isoform X1 [Acanthaster planci] (id=66.69%; len=1210; e=0.00E+00)	2695	2	2.413	0.5358	1.44459	2	2	0	1	16.6535	16.7463	16.5481	16.6402	16.6767	17.1485	17.262	17.2819	16.8462	16.643	16.5011	-0.0782163	-0.567349	0.30881	0.0180822
PMI_007349		XP_022096135.1 uncharacterized protein LOC110982186 [Acanthaster planci] (id=50.66%; len=1447; e=0.00E+00)			3.776	0.7225	1.59652	3	3	1	2	18.3042	18.3964	17.825	18.1827	17.8638	18.2771	18.8219	18.652	17.8583	18.1794	18.0225	-0.393157	-0.5636	0.0603015	0.0516878
m.17797	23368	XP_022103471.1 meiosis regulator and mRNA stability factor 1-like [Acanthaster planci] (id=70.16%; len=1940; e=0.00E+00)			3.249	0.3752	1.25537	1	1	1	0	13.9331	13.737	13.6823	13.9258	13.576	14.2637	13.9879	14.3455	13.8631	13.1231	13.922	-0.107039	-0.562966	0.511778	0.1474
PMI_009714		XP_022081531.1 multidrug resistance-associated protein 7-like [Acanthaster planci] (id=82.76%; len=847; e=0.00E+00)			1.729	0.4818	0.344743	1	1	1	0	15.7304	15.5072	14.7494	15.4744	15.2512	16.2966	16.0072	16.0078	15.2276	15.9317	15.477	-0.460499	-0.55848	0.158753	0.0962845
PMI_014510		XP_022095658.1 phospholipase DDHD1-like [Acanthaster planci] (id=76.20%; len=811; e=0.00E+00)			4.348	0.7567	0.51265	11	9	3	6	20.342	20.3063	20.4434	20.4463	20.4663	20.6874	20.9285	20.9463	20.1753	20.3717	20.3578	0.127824	-0.552464	0.0552922	0.00752908
m.11740	Pmi_573491_S	S12A9_XENLA_Solute_carrier_family_12_member_9			4.25	0.6405	2.19139	1	1	1	0	16.872	16.7586	16.5286	17.1433	16.8151	17.5764	17.8564	17.9067	17.5899	17.0912	17.0046	0.0137176	-0.551273	0.947069	0.0741444
PMI_010539; m.10209	None; Pmi_557200_D	XP_022091276.1 trans-1,2-dihydrobenzene-1,2-diol dehydrogenase-like [Acanthaster planci] (id=73.74%; len=278; e=2.70E-144) ; DHDH_DANRE_Trans-1,2-dihydrobenzene-1,2-diol_dehydrogenase	477	1	2.74	0.3234	1.12191	1	1	0	0	17.2146	17.0494	17.1441	17.5055	16.797	17.5497	18.1672	18.0205	17.6364	17.2154	17.2386	0.0168492	-0.548989	0.944658	0.0821093
PMI_007925		XP_022099629.1 high mobility group protein 1 homolog isoform X1 [Acanthaster planci] (id=93.12%; len=160; e=5.94E-96)			4.134	0.7441	0.718526	4	3	1	2	18.5495	18.6387	18.4734	18.3195	18.3493	18.7701	19.1272	19.0351	18.2811	18.5329	18.4818	-0.213384	-0.545518	0.0520331	0.01755
m.32358	48416	XP_022111005.1 pyridine nucleotide-disulfide oxidoreductase domain-containing protein 2-like [Acanthaster planci] (id=82.94%; len=598; e=0.00E+00)			5.183	0.6606	0.726719	5	5	0	4	21.0513	21.1015	20.9794	20.5828	20.8676	21.2973	21.703	21.1931	20.7558	20.905	20.9211	-0.26647	-0.537119	0.147589	0.0621822
m.2066	Pmi_366430_M	MBOA5_MOUSE_Lysophospholipid_acyltransferase_5			2.85	0.5425	2.51763	1	1	1	0	14.4812	14.7601	14.6402	14.5032	14.8667	15.2323	15.7855	15.4939	15.0311	14.8331	15.0424	0.0493915	-0.535007	0.802996	0.0620791
PMI_022367		WP_002745787.1 profilin [Microcystis aeruginosa] (id=31.69%; len=142; e=1.18E-14)			5.176	0.7386	1.28454	3	2	1	1	16.7642	16.64	16.7055	16.9732	16.7888	16.9158	17.3766	17.0271	16.4937	16.5534	16.6771	0.120412	-0.53173	0.318006	0.0473804
m.14943; m.24291; PMI_004367	20385; Pmi_646162_L; None	XP_022110934.1 lysosomal-trafficking regulator-like [Acanthaster planci] (id=80.64%; len=315; e=3.42E-167) ; LYST_MOUSE_Lysosomal-trafficking_regulator; XP_022110934.1 lysosomal-trafficking regulator-like [Acanthaster planci] (id=75.87%; len=3920; e=0.00E+00)	2071	1	2.268	0.5732	1.06362	1	1	0	0	15.6622	15.6583	15.3032	15.4354	15.2879	15.8938	16.0411	16.0128	15.5486	15.4641	15.3756	-0.318097	-0.519742	0.020837	0.0015779
m.18703; PMI_027497; PMI_015142	Pmi_621230_I; None; None	ICT1_MOUSE_Peptidyl-tRNA_hydrolase_ICT1,_mitochondrial; XP_022084933.1 peptidyl-tRNA hydrolase ICT1, mitochondrial-like [Acanthaster planci] (id=77.89%; len=199; e=3.13E-109) ; XP_022084933.1 peptidyl-tRNA hydrolase ICT1, mitochondrial-like [Acanthaster planci] (id=85.71%; len=84; e=1.09E-42)	1431	1	1.188	0.3106	1.43874	1	1	0	0	18.2732	18.499	17.7906	18.2114	18.2713	19.0116	19.0249	19.0101	18.6252	18.4083	18.4592	-0.295024	-0.517947	0.216202	0.0152362
m.14613; PMI_014932	Pmi_595962_I; None	ITIH4_HUMAN_Inter-alpha-trypsin_inhibitor_heavy_chain_H4; XP_022107825.1 uncharacterized protein LOC110988527 [Acanthaster planci] (id=83.44%; len=1673; e=0.00E+00)	2805	1	2.566	0.4493	1.48844	1	1	0	0	14.9126	15.3548	14.9308	14.8558	14.9979	15.572	15.7801	15.4213	15.12	14.9789	15.1332	-0.205555	-0.513768	0.520446	0.0232163
PMI_024109		XP_022096135.1 uncharacterized protein LOC110982186 [Acanthaster planci] (id=64.81%; len=594; e=0.00E+00)			3.337	0.6181	1.42085	2	2	1	1	17.8968	18.3497	17.9696	17.8675	17.8065	18.3119	18.6038	18.8614	17.933	18.2314	18.0797	-0.242056	-0.510985	0.474183	0.0641099
m.4273	Pmi_457170_D	DMBT1_HUMAN_Deleted_in_malignant_brain_tumors_1_protein			3.23	0.6923	1.51693	2	2	2	0	16.9818	17.1397	17.1016	16.6629	16.7057	17.1551	17.399	17.6628	16.7805	16.8469	17.0568	-0.237357	-0.510907	0.23881	0.0524374
m.9283; m.7826	14310; Pmi_527781_W	XP_022096572.1 WD repeat-containing protein 6-like isoform X1 [Acanthaster planci] (id=76.19%; len=147; e=1.83E-68) ; WDR6_PONAB_WD_repeat-containing_protein_6	937	1	2.422	0.5367	1.73634	1	1	0	0	15.8209	16.2329	15.8592	16.0099	15.8604	16.731	17.1953	16.053	15.5217	16.3149	16.6264	-0.11705	-0.50543	0.670665	0.340072
PMI_001197		XP_022098108.1 lipopolysaccharide-binding protein-like [Acanthaster planci] (id=61.05%; len=493; e=0.00E+00)			1.895	0.2623	2.7949	1	1	1	0	20.3814	20.311	20.7344	18.8678	20.5073	20.7329	20.2953	20.2673	18.8164	20.4707	20.5036	-0.30971	-0.501573	0.651197	0.466134
m.22105	Pmi_637290_C	CCDB1_XENLA_Cyclin-D1-binding_protein_1_homolog			4.219	0.6318	0.576573	4	3	0	3	19.2831	19.4416	19.2977	19.0942	19.2943	19.6699	19.8423	19.239	18.5283	19.114	19.6092	-0.133625	-0.499895	0.310742	0.254245
PMI_000884; PMI_000883		XP_022080067.1 von Willebrand factor A domain-containing protein 2-like [Acanthaster planci] (id=68.59%; len=554; e=0.00E+00) ; XP_022080067.1 von Willebrand factor A domain-containing protein 2-like [Acanthaster planci] (id=68.83%; len=539; e=0.00E+00)	1327	1	3.459	0.3744	1.90465	1	1	0	0	13.3555	13.9022	13.5872	13.69	13.4386	13.7902	14.2573	13.4594	12.7933	13.6525	13.5668	-0.0569125	-0.49807	0.870311	0.238433
m.10478; m.2359	Pmi_560550_P; 4275	PKHL1_MOUSE_Fibrocystin-L; XP_022097673.1 fibrocystin-L-like isoform X1 [Acanthaster planci] (id=80.18%; len=111; e=1.03E-54)	702	1	4.503	0.6696	1.9	1	1	0	0	15.8144	15.8982	16.0734	15.4835	16.0412	16.1874	16.1132	15.9187	15.7841	15.4697	15.4936	0.00972545	-0.490616	0.964596	0.0208818
m.50546; m.13151	75672; Pmi_585290_P	XP_022090297.1 peroxisome biogenesis factor 10-like [Acanthaster planci] (id=76.24%; len=101; e=1.55E-49) ; PEX10_HUMAN_Peroxisome_biogenesis_factor_10	2462	1	4.08	0.8203	0.658977	1	1	0	0	12.1564	10.413	11.6144	11.1145	11.6404	11.6637	11.2621	11.7396	10.5099	11.6812	11.003	0.171721	-0.490444	0.876653	0.285306
PMI_026974		XP_022085449.1 UPF0415 protein C7orf25 homolog isoform X3 [Acanthaster planci] (id=59.75%; len=395; e=1.93E-152)			4.47	0.6662	1.2331	1	1	1	0	14.4728	14.3506	14.4034	14.4532	14.6096	14.8032	14.5744	14.5692	14.093	14.3103	14.0725	0.0770202	-0.490363	0.448492	0.01061
m.3198; PMI_001782; PMI_001781	Pmi_416190_S; None; None	SNAT_MESAU_Serotonin_N-acetyltransferase; XP_022102295.1 uncharacterized N-acetyltransferase C9.02c-like [Acanthaster planci] (id=46.15%; len=65; e=6.83E-10) ; XP_022102295.1 uncharacterized N-acetyltransferase C9.02c-like [Acanthaster planci] (id=39.87%; len=148; e=1.87E-28)	517	1	3.362	0.613	1.66917	2	1	0	0	18.6902	18.5337	18.6584	17.7446	18.3267	18.532	18.6289	18.7117	17.9647	18.2835	18.1564	-0.368747	-0.489378	0.300409	0.0173554
PMI_008698; PMI_003726; m.24520	None; None; Pmi_647090_P	XP_022091597.1 pleiotropic regulator 1-like [Acanthaster planci] (id=96.47%; len=198; e=1.29E-138) ; XP_022091597.1 pleiotropic regulator 1-like [Acanthaster planci] (id=89.53%; len=516; e=0.00E+00) ; PLRG1_BOVIN_Pleiotropic_regulator_1	713	1	2.048	0.4761	1.03502	1	1	0	0	18.3916	18.7112	17.8982	17.7541	17.7437	18.2226	18.5648	18.0827	17.6234	17.9808	17.8064	-0.752726	-0.486478	0.107958	0.0567393
PMI_028960		XP_022110261.1 unconventional myosin-Ie-like isoform X3 [Acanthaster planci] (id=68.66%; len=201; e=4.39E-76)			4.045	0.5573	0.606737	5	3	0	0	19.949	20.0325	20.0586	20.0623	20.1366	20.553	20.5629	20.553	19.8455	20.0911	20.2761	0.0951039	-0.485388	0.208493	0.0600063
PMI_006333; m.26611	None; Pmi_654660_n	XP_022080811.1 CASP-like protein 4A1 [Acanthaster planci] (id=53.78%; len=225; e=5.05E-55) ; no_annot	790	1	2.988	0.5703	1.07086	1	1	0	0	11.9954	12.5632	12.4866	12.532	12.5044	12.3963	12.776	12.884	11.9884	11.914	12.7	0.228383	-0.484633	0.568557	0.187449
PMI_028152		XP_022087655.1 sulfite oxidase-like [Acanthaster planci] (id=77.86%; len=637; e=0.00E+00)			2.968	0.5013	1.77289	1	1	1	0	15.2245	15.0509	14.7831	14.4885	14.8197	15.3255	15.2571	15.1588	14.7789	14.5231	14.9935	-0.440579	-0.481991	0.0495927	0.0579498
m.32975; m.28634; m.32978; m.32982	49314; Pmi_661170_G; 49315; 49316	XP_022108217.1 poly(A) RNA polymerase gld-2 homolog B-like isoform X1 [Acanthaster planci] (id=70.77%; len=650; e=0.00E+00) ; GLD2_DANRE_Poly(A)_RNA_polymerase_GLD2; XP_022108217.1 poly(A) RNA polymerase gld-2 homolog B-like isoform X1 [Acanthaster planci] (id=71.08%; len=650; e=0.00E+00) ; XP_022108217.1 poly(A) RNA polymerase gld-2 homolog B-like isoform X1 [Acanthaster planci] (id=70.77%; len=…	1009	1	1.788	0.3216	2.05731	1	1	0	0	13.8323	13.7405	12.7781	13.0667	13.3381	14.1183	14.0624	14.0234	13.59	13.6208	13.5507	-0.725428	-0.480871	0.0383363	0.000248815
PMI_012077		XP_022086464.1 PGAP2-interacting protein-like [Acanthaster planci] (id=82.64%; len=507; e=0.00E+00)			2.311	0.4505	1.68054	2	2	2	0	15.8239	15.9464	15.3048	15.473	15.6102	15.9743	16.3676	16.301	15.9269	15.6559	15.6218	-0.422522	-0.479387	0.0293141	0.0391452
PMI_002005		XP_022104139.1 lymphocyte-specific helicase-like [Acanthaster planci] (id=78.58%; len=817; e=0.00E+00)			3.658	0.6365	0.725241	6	6	1	5	18.75	19.079	18.4737	18.4459	18.6738	19.2923	19.104	19.2855	18.7759	18.7425	18.7328	-0.383398	-0.476892	0.218991	0.0133242
PMI_027409; m.49650	None; 74328	XP_022095702.1 uncharacterized protein LOC110981950 [Acanthaster planci] (id=56.55%; len=336; e=8.40E-108) ; XP_022095702.1 uncharacterized protein LOC110981950 [Acanthaster planci] (id=52.78%; len=396; e=5.17E-115)	1262	1	1.746	0.4576	2.84174	1	1	0	0	17.288	17.0006	17.2004	17.0684	17.0223	17.436	17.5427	17.6424	17.2863	17.1582	16.7467	-0.0473043	-0.476669	0.800238	0.0856565
m.22753	Pmi_640222_K	K0317_HUMAN_Protein_KIAA0317			4.662	0.7943	0.649704	8	7	2	5	19.4261	19.4484	19.0971	19.2691	19.3385	19.7748	19.8191	19.8021	19.3148	19.2631	19.3892	-0.202354	-0.47629	0.102877	0.00273834
PMI_002431; m.22713; m.24592	None; 31762; Pmi_647340_R	XP_022095462.1 ribosomal RNA-processing protein 7 homolog A-like [Acanthaster planci] (id=76.89%; len=238; e=1.09E-121) ; XP_022095462.1 ribosomal RNA-processing protein 7 homolog A-like [Acanthaster planci] (id=81.85%; len=270; e=2.41E-155) ; RRP7A_HUMAN_Ribosomal_RNA-processing_protein_7_homolog_A	2370	1	2.455	0.3548	1.83658	1	1	0	0	15.2104	15.3991	15.3975	13.7516	14.5774	14.4324	14.4936	14.6435	13.8379	14.1441	14.1633	-0.729251	-0.474754	0.262554	0.0263067
PMI_000241		XP_022092476.1 centromere protein X-like [Acanthaster planci] (id=96.30%; len=81; e=6.48E-39)			3.211	0.4734	1.35068	1	1	1	0	16.3148	16.3157	16.109	15.6971	16.0944	16.2625	16.3499	16.5143	16.1155	15.6688	15.9189	-0.348432	-0.47451	0.122941	0.0459618
PMI_022987; PMI_019567; m.24022	None; None; Pmi_645070_N	XP_022085194.1 NADPH-dependent diflavin oxidoreductase 1-like [Acanthaster planci] (id=68.76%; len=605; e=0.00E+00) ; XP_022085194.1 NADPH-dependent diflavin oxidoreductase 1-like [Acanthaster planci] (id=82.85%; len=554; e=0.00E+00) ; NDOR1_XENLA_NADPH-dependent_diflavin_oxidoreductase_1	890	1	3.928	0.6716	1.24385	1	1	0	0	15.1764	15.2345	14.827	15.1645	15.239	15.8561	15.2214	15.8387	14.967	15.0758	15.4504	-0.128627	-0.474301	0.418479	0.144571
PMI_022297; PMI_008899		ELT95943.1 hypothetical protein CAPTEDRAFT_186662 [Capitella teleta] (id=35.71%; len=308; e=3.76E-50) ; XP_011677380.1 PREDICTED: Werner syndrome ATP-dependent helicase homolog [Strongylocentrotus purpuratus] (id=37.21%; len=172; e=5.22E-31)	2085	1	2.777	0.318	1.99684	1	1	0	0	15.8076	15.5346	16.0948	15.6229	15.9202	16.1882	15.9872	16.0247	15.6717	15.372	15.734	0.208184	-0.474158	0.369944	0.0318144
PMI_002794		XP_022097519.1 uncharacterized protein LOC110982993 isoform X2 [Acanthaster planci] (id=83.51%; len=1104; e=0.00E+00)			3.05	0.7138	0.808519	2	2	0	2	15.6251	15.9869	15.2408	15.0816	15.2163	15.5655	15.8227	15.4939	14.8588	15.3343	15.2722	-0.626458	-0.472263	0.158348	0.0668968
PMI_012528		XP_022087295.1 E3 ubiquitin-protein ligase UHRF1-like [Acanthaster planci] (id=80.15%; len=932; e=0.00E+00)			4.284	0.8098	0.462362	10	8	1	7	20.116	20.1525	19.7401	19.5138	19.6427	20.2422	20.2687	20.1012	19.5963	19.6934	19.9103	-0.502098	-0.470707	0.012067	0.0194391
PMI_012246		XP_022089844.1 uncharacterized protein LOC110978853 [Acanthaster planci] (id=38.40%; len=125; e=2.87E-15)			5.306	0.7595	0.953096	3	2	1	0	19.7545	19.4416	19.8321	19.5669	19.6707	19.6805	19.6362	19.8186	19.7565	19.1357	18.837	0.091859	-0.468685	0.665687	0.222404
PMI_026032		XP_022093266.1 F-box only protein 21-like [Acanthaster planci] (id=71.96%; len=296; e=6.57E-156)			4.687	0.7113	0.383961	20	6	0	0	23.41	23.4717	23.4112	23.5056	23.5447	23.9949	23.9778	24.0119	23.4442	23.6169	23.5253	0.0463331	-0.46605	0.425037	0.00918233
m.57336	85843	YP_492667.1 NADH dehydrogenase subunit 1 (mitochondrion) [Acanthaster brevispinus] (id=80.52%; len=154; e=3.08E-80)			6.278	0.7985	0.779991	2	1	1	0	20.7515	19.7437	20.8465	20.5367	20.5689	21.0314	20.7788	20.7334	20.3474	20.3747	20.4339	0.403074	-0.462532	0.568544	0.0305569
m.33726	Pmi_6894960_	no_annot			3.507	0.717	1.21814	2	1	1	0	16.4065	16.6984	16.7849	16.2691	16.319	16.9627	16.806	15.9545	15.1938	16.855	16.2976	-0.0948021	-0.458934	0.696682	0.48017
m.44934; m.14698; m.44926	67300; Pmi_596730_D; 67296	XP_022080565.1 dihydropteridine reductase-like isoform X2 [Acanthaster planci] (id=85.17%; len=236; e=9.04E-141) ; DHPR_RAT_Dihydropteridine_reductase; XP_022080565.1 dihydropteridine reductase-like isoform X2 [Acanthaster planci] (id=84.75%; len=236; e=1.31E-139)	2373	9	5.542	0.7966	0.543525	24	9	0	6	23.5346	23.6296	23.5832	23.6217	23.6067	23.9796	24.1835	24.1008	23.6659	23.6116	23.6284	0.0217588	-0.452701	0.726836	0.0121043
m.43777; PMI_020676	65828; None	XP_022082502.1 protein UXT-like isoform X1 [Acanthaster planci] (id=88.31%; len=154; e=1.83E-98) ; XP_022082503.1 protein UXT-like isoform X2 [Acanthaster planci] (id=87.83%; len=115; e=1.45E-68)	2712	1	3.338	0.6049	1.96567	1	1	0	0	16.084	16.1574	16.1896	15.9224	16.151	16.476	16.4694	16.3519	15.6525	16.0465	16.2452	-0.0330301	-0.451058	0.743883	0.115684
PMI_025260		XP_022092649.1 transcription elongation factor, mitochondrial-like isoform X1 [Acanthaster planci] (id=66.95%; len=357; e=9.67E-174)			2.034	0.2793	2.13687	1	1	1	0	17.5252	17.2654	17.4043	17.1962	17.5275	18.1054	18.0052	17.8127	17.4609	17.3779	17.7346	-0.0192855	-0.449958	0.915668	0.0332158
PMI_009120; m.45682; m.45689; m.17949	None; 68469; 68492; Pmi_617191_P	XP_022098696.1 serine/threonine-protein phosphatase 2A regulatory subunit B'' subunit beta-like isoform X2 [Acanthaster planci] (id=90.66%; len=578; e=0.00E+00) ; XP_022098693.1 serine/threonine-protein phosphatase 2A regulatory subunit B'' subunit beta-like isoform X1 [Acanthaster planci] (id=93.88%; len=343; e=0.00E+00) ; XP_022098696.1 serine/threonine-protein phosphatase 2A regulatory subunit…	1219	1	2.585	0.4882	1.06482	1	1	0	0	16.0372	15.0433	16.6902	15.1332	15.843	15.7709	15.6607	16.1045	14.6687	15.8771	15.6404	0.348548	-0.44994	0.645937	0.349593
m.12218; m.3545; PMI_021429; PMI_007510	Pmi_577451_F; 6206; None; None	FOLH1_RAT_Glutamate_carboxypeptidase_2; XP_022098033.1 N-acetylated-alpha-linked acidic dipeptidase 2-like isoform X1 [Acanthaster planci] (id=71.92%; len=235; e=5.08E-111) ; XP_022098034.1 N-acetylated-alpha-linked acidic dipeptidase 2-like isoform X2 [Acanthaster planci] (id=71.04%; len=801; e=0.00E+00) ; XP_022098034.1 N-acetylated-alpha-linked acidic dipeptidase 2-like isoform X2 [Acanthaster…	416	1	1.364	0.5674	1.33242	1	1	0	0	15.2731	15.6651	15.1002	15.2225	15.318	15.4989	15.8502	15.6792	15.1647	15.2961	15.2182	-0.255518	-0.449793	0.40313	0.0344709
m.4122	Pmi_451411_n	no_annot			3.645	0.5407	0.657274	1	1	1	0	16.8731	16.7801	16.7335	16.7228	17.1681	17.0714	17.4476	17.0811	16.6999	16.9176	16.6385	0.0481809	-0.448055	0.779611	0.0473243
PMI_008559; PMI_021738; m.26585	None; None; Pmi_654570_C	XP_022107707.1 protein C8orf37 homolog isoform X3 [Acanthaster planci] (id=66.43%; len=143; e=6.50E-55) ; XP_022107706.1 protein C8orf37 homolog isoform X2 [Acanthaster planci] (id=88.78%; len=214; e=4.58E-126) ; CH037_MOUSE_Protein_C8orf37_homolog	540	2	3.432	0.4583	1.39615	2	2	0	0	18.3675	18.509	18.3298	18.2515	18.2845	18.5985	18.7773	18.779	18.3006	18.3343	18.1787	-0.14968	-0.447087	0.257965	0.00497645
m.14071; m.16299	19548; Pmi_607141_P	XP_022095803.1 trichohyalin-like [Acanthaster planci] (id=60.75%; len=451; e=2.07E-102) ; POP5_MOUSE_Ribonuclease_P/MRP_protein_subunit_POP5	387	1	2.264	0.5044	2.01487	1	1	0	0	14.4418	14.3615	14.341	13.6662	13.9029	14.3549	14.3726	14.4375	13.4946	14.3074	14.0249	-0.43162	-0.44601	0.156172	0.200924
PMI_014647		XP_022093895.1 phytanoyl-CoA dioxygenase domain-containing protein 1-like isoform X1 [Acanthaster planci] (id=85.51%; len=276; e=3.40E-178)			3.298	0.6164	1.70678	2	2	1	1	18.6715	18.8346	18.6023	18.6619	18.7452	19.0837	19.2138	19.3298	18.813	18.7526	18.7244	-0.0832521	-0.445801	0.482899	0.0154904
m.19289; m.42370; PMI_013317	Pmi_624260_M; 63951; None	MDH_PYRAB_Malate_dehydrogenase; XP_022083653.1 uncharacterized protein LOC110975448 [Acanthaster planci] (id=82.81%; len=384; e=0.00E+00) ; XP_022083653.1 uncharacterized protein LOC110975448 [Acanthaster planci] (id=61.48%; len=405; e=6.05E-164)	1892	1	2.251	0.2839	1.97497	1	1	0	0	16.0341	17.0203	15.6994	15.8417	15.6053	16.0684	16.2531	16.2059	15.6307	15.7577	15.8201	-0.811715	-0.439624	0.34338	0.00500737
PMI_028933		XP_022105871.1 dynactin subunit 3-like [Acanthaster planci] (id=67.74%; len=93; e=1.18E-36)			3.748	0.5936	0.968426	3	3	0	0	19.1864	19.4522	19.0343	19.1671	19.1599	19.6341	19.9475	19.7972	19.4459	19.3503	19.2675	-0.198864	-0.438363	0.358246	0.021902
PMI_021193		XP_022110598.1 uncharacterized protein LOC110990090 [Acanthaster planci] (id=41.65%; len=1102; e=0.00E+00)			1.232	0.3945	1.93115	1	1	1	0	15.8077	15.6578	15.2235	16.9367	17.9606	17.3505	16.5197	16.6439	14.9827	17.2556	16.9812	0.974166	-0.431566	0.346598	0.617536
m.48647	72806	XP_022088424.1 uncharacterized protein LOC110978062 isoform X1 [Acanthaster planci] (id=79.08%; len=435; e=1.54E-169)			3.122	0.6406	0.950378	6	4	0	2	17.8694	18.2936	17.5997	17.4828	17.6427	17.7869	18.1733	18.2153	17.411	17.7745	17.7025	-0.506451	-0.429186	0.239177	0.0737809
m.19082	Pmi_623241_E	EGFL6_XENLA_Epidermal_growth_factor-like_protein_6			4.704	0.6873	0.84378	2	2	1	1	18.1012	18.1689	17.9189	18.167	18.2975	18.727	19.0246	18.8745	18.0822	18.406	18.8531	-0.00721423	-0.428251	0.955346	0.186442
m.51575; PMI_010792; m.51587; m.28251	77081; None; 77086; Pmi_659750_O	XP_022087380.1 origin recognition complex subunit 1-like [Acanthaster planci] (id=70.73%; len=1001; e=0.00E+00) ; XP_022087380.1 origin recognition complex subunit 1-like [Acanthaster planci] (id=62.29%; len=724; e=0.00E+00) ; XP_022087380.1 origin recognition complex subunit 1-like [Acanthaster planci] (id=65.56%; len=781; e=0.00E+00) ; ORC1_HUMAN_Origin_recognition_complex_subunit_1	1153	3	4.458	0.6757	1.12658	3	3	0	3	18.89	19.1541	18.7172	18.7929	18.8236	19.1977	19.2094	19.1735	18.6857	18.7066	18.9065	-0.244176	-0.427261	0.302967	0.0239656
m.24062; PMI_001852	Pmi_645251_N; None	NEO1_HUMAN_Neogenin; XP_022084201.1 fibronectin-like isoform X3 [Acanthaster planci] (id=57.17%; len=537; e=2.10E-178)	668	2	3.503	0.6566	1.66342	2	2	0	1	15.9786	16.4345	15.9307	15.7075	15.6525	16.1486	16.3954	16.1816	15.5247	16.0204	15.9017	-0.443001	-0.42625	0.275053	0.0851874
PMI_021011		XP_022080749.1 MMS19 nucleotide excision repair protein homolog [Acanthaster planci] (id=63.62%; len=591; e=0.00E+00)			3.242	0.6575	1.07032	4	2	0	1	18.3042	18.1732	18.24	17.4189	17.9679	18.1947	18.0624	18.3055	17.6838	17.9692	17.6325	-0.363137	-0.425685	0.269085	0.0342911
m.24280; m.30983	Pmi_646105_X; 46308	XYLT_ARATH_Beta-(1,2)-xylosyltransferase; XP_022106694.1 beta-(1,2)-xylosyltransferase-like isoform X1 [Acanthaster planci] (id=75.59%; len=467; e=0.00E+00)	1771	1	3.116	0.5501	1.73693	1	1	0	0	14.5683	13.7752	13.6893	12.8088	13.7353	13.9082	14.2668	14.1433	13.7848	13.5467	13.7227	-0.760606	-0.421367	0.258763	0.0357223
m.19440	Pmi_624874_n	no_annot			1.426	0.3142	0.85533	1	1	1	0	18.0928	17.6516	18.0032	17.7	18.1673	18.1035	18.0394	17.9093	17.6438	17.4245	17.7206	0.084657	-0.421077	0.778561	0.0220694
m.43822; m.27981	65882; Pmi_659091_n	XP_022098233.1 uncharacterized protein LOC110983350 isoform X1 [Acanthaster planci] (id=35.37%; len=1145; e=1.42E-117) ; no_annot	2693	1	1.928	0.3008	0.074425	1	1	0	0	16.8733	17.0069	16.8817	16.7881	17.0157	17.2338	17.1725	17.1525	16.5143	16.9453	16.8377	-0.0449256	-0.420496	0.669131	0.0784307
PMI_016775		XP_022094806.1 adhesion G-protein coupled receptor G2-like isoform X1 [Acanthaster planci] (id=55.21%; len=96; e=5.45E-25)			1.5	0.2707	0.000218	1	1	1	0	17.5011	17.6237	17.4118	16.8945	17.2616	17.5308	17.6352	17.4917	16.5723	17.378	17.447	-0.373155	-0.420144	0.124586	0.271859
m.32008; PMI_001189; PMI_026301; m.56660	Pmi_670781_A; None; None; 84613	ATS9_HUMAN_A_disintegrin_and_metalloproteinase_with_throm..CUT; XP_022084205.1 uncharacterized protein LOC110975757 [Acanthaster planci] (id=44.12%; len=2838; e=0.00E+00) ; XP_022084205.1 uncharacterized protein LOC110975757 [Acanthaster planci] (id=66.67%; len=276; e=3.26E-118) ; XP_022084205.1 uncharacterized protein LOC110975757 [Acanthaster planci] (id=68.24%; len=3243; e=0.00E+00)	1455	2	4.592	0.7158	1.19098	2	2	0	0	17.1286	17.3534	17.0069	16.932	16.7811	17.5289	17.3981	17.6626	17.0168	17.1	17.2157	-0.334351	-0.418997	0.144822	0.0139269
PMI_023152; m.13748	None; Pmi_589713_A	XP_022102317.1 ankyrin repeat and IBR domain-containing protein 1-like isoform X1 [Acanthaster planci] (id=85.52%; len=580; e=0.00E+00) ; AKIB1_DANRE_Ankyrin_repeat_and_IBR_domain-containing_protein_1	1612	1	1.854	0.3981	2.21907	1	1	0	0	12.924	12.3312	12.6917	12.221	12.4872	13.3666	12.9329	13.5413		12.9994	12.7302	-0.160971	-0.415496	0.686592	0.162765
m.29932	44520	XP_022100182.1 sodium- and chloride-dependent neutral and basic amino acid transporter B(0+)-like [Acanthaster planci] (id=86.85%; len=707; e=0.00E+00)			3.256	0.6483	1.06262	1	1	1	0	15.4161	15.4626	14.9441	14.8971	15.1279	15.3161	15.6707	15.2458	15.0082	15.0688	14.91	-0.449652	-0.415223	0.016539	0.0740865
m.46188	69234	XP_022106044.1 lamin-B1-like isoform X4 [Acanthaster planci] (id=84.81%; len=566; e=0.00E+00)			5.728	0.8482	0.649861	35	24	1	23	22.478	22.6528	22.4097	22.4516	22.5821	22.818	23.1793	23.1035	22.5604	22.6567	22.6381	-0.0843085	-0.415163	0.505911	0.0551291
m.31549	Pmi_669633_n	no_annot			2.133	0.4754	2.89413	1	1	1	0	16.4105	15.3154	15.6149	16.4121	15.9143	17.0759	16.6644	17.1443	16.9906	17.01	15.6397	0.117417	-0.414773	0.868744	0.462383
m.12240	17648	XP_022103186.1 protein maelstrom homolog [Acanthaster planci] (id=74.52%; len=310; e=1.28E-165)			3.006	0.6241	0.985562	2	2	1	1	17.7401	18.1004	17.8476	17.793	17.716	18.2788	18.5424	18.3822	17.819	18.0399	18.1023	-0.134745	-0.414049	0.589367	0.023374
m.17504	Pmi_614900_Z	ZMY10_HUMAN_Zinc_finger_MYND_domain-containing_protein_10			3.575	0.7117	0.262164	5	2	1	1	17.2566	17.1492	17.2074	17.0299	17.2478	17.4853	17.7985	17.256	16.7392	17.1755	17.3838	-0.0412344	-0.413792	0.664157	0.171092
m.8922	Pmi_541541_n	no_annot			3.964	0.4624	2.18434	1	1	1	0	13.4982	13.7372	13.4439	12.7822	13.1196	13.2547	13.5554	13.6263	12.8518	13.4297	12.9201	-0.502435	-0.411586	0.113085	0.141644
m.28597	Pmi_660972_L	L14BB_XENLA_Protein_LSM24_homolog_B-B			6.408	0.8178	0.203557	69	19	0	0	24.2034	24.1361	24.105	24.063	24.1034	24.2687	24.381	24.4303	24.2327	23.8721	23.7421	-0.0792303	-0.41102	0.219975	0.0956299
PMI_023579; m.29255; m.11772	None; 43392; Pmi_573680_T	XP_022101624.1 thioredoxin-like [Acanthaster planci] (id=59.80%; len=102; e=1.96E-33) ; XP_022101624.1 thioredoxin-like [Acanthaster planci] (id=74.58%; len=118; e=7.22E-62) ; THIO_RABIT_Thioredoxin	847	2	4.341	0.6533	0.114283	3	2	0	0	19.0994	19.2749	19.1553	19.2609	19.0476	19.3948	19.5893	19.6237	19.2081	19.1534	19.0149	-0.0325386	-0.410477	0.790291	0.0121238
m.24475	Pmi_646950_B	BTBD8_HUMAN_BTB/POZ_domain-containing_protein_8			3.28	0.4512	2.08032	1	1	1	0	16.9179	16.4455	17.0097	16.0974	16.6884	16.572	16.4241	16.7904	16.2117	16.1854	16.1601	-0.083258	-0.409723	0.831117	0.058688
PMI_028654; m.40896	None; 61836	XP_022090299.1 SUZ domain-containing protein 1-like [Acanthaster planci] (id=75.16%; len=153; e=1.47E-60) ; XP_022090299.1 SUZ domain-containing protein 1-like [Acanthaster planci] (id=76.47%; len=153; e=2.53E-62)	44	1	1.256	0.4371	1.14476	1	1	0	0	14.1416	14.8654	14.7579	15.1355	14.1095	14.6797	14.5578	14.5053	14.3959	13.8134	14.3141	0.164098	-0.40649	0.756318	0.14701
m.13823	Pmi_590410_G	GNA13_HUMAN_Guanine_nucleotide-binding_protein_subunit_alpha-13			3.506	0.7384	0.947502	4	4	1	3	20.3296	20.2954	20.2048	20.319	20.2947	20.5701	20.8687	20.7407	20.3129	20.2693	20.3779	-0.0397045	-0.406445	0.386423	0.0306797
PMI_008384; m.8730	None; 13594	XP_022104697.1 unconventional myosin-IXa-like, partial [Acanthaster planci] (id=83.68%; len=827; e=0.00E+00) ; XP_022104697.1 unconventional myosin-IXa-like, partial [Acanthaster planci] (id=89.00%; len=200; e=7.44E-100)	1211	1	3.529	0.6979	1.19942	1	1	0	0	12.6471	12.8897	12.7922	12.9407	12.7714	12.981	12.8663	13.3938	12.5751	12.9159	12.5364	0.0663875	-0.404546	0.683849	0.119137
m.3357; m.14468; PMI_002160; PMI_019665	5946; Pmi_594900_K; None; None	XP_022091579.1 probable phosphorylase b kinase regulatory subunit alpha isoform X2 [Acanthaster planci] (id=83.58%; len=335; e=0.00E+00) ; KPB1_HUMAN_Phosphorylase_b_kinase_regulatory_subunit_alpha..CUT; XP_022091579.1 probable phosphorylase b kinase regulatory subunit alpha isoform X2 [Acanthaster planci] (id=85.31%; len=531; e=0.00E+00) ; XP_022091578.1 probable phosphorylase b kinase regulator…	1763	1	1.947	0.3436	1.01269	1	1	0	0	16.872	17.0003	17.0735	16.7658	16.76	16.9121	17.0064	16.8683	16.9134	16.3025	16.3575	-0.0697089	-0.404468	0.607731	0.169287
PMI_027366		XP_022104676.1 sorbitol dehydrogenase-like isoform X1 [Acanthaster planci] (id=90.91%; len=253; e=1.95E-157)			3.492	0.5985	0.809339	6	2	1	0	21.1071	20.9377	21.1263	20.8984	20.8454	21.0688	21.1463	21.2898	21.0995	20.6943	20.4978	-0.0657508	-0.40444	0.62806	0.138193
m.23866; m.17216	Pmi_644530_P; 22569	PDDC1_XENLA_Parkinson_disease_7_domain-containing_protein_1; XP_022083617.1 glutamine amidotransferase-like class 1 domain-containing protein 1 [Acanthaster planci] (id=91.56%; len=225; e=5.75E-150)	376	1	3.623	0.6257	0.794286	1	1	0	0	17.3349	17.5266	16.9665	17.0857	17.3866	18.0691	17.9144	17.7328	17.2716	17.5058	17.7257	-0.284483	-0.404414	0.169258	0.073694
m.8755; PMI_012764	Pmi_539550_A; None	ANR49_MOUSE_Ankyrin_repeat_domain-containing_protein_49; XP_022107355.1 ankyrin repeat domain-containing protein 49-like [Acanthaster planci] (id=87.75%; len=196; e=9.49E-127)	1718	1	2.599	0.6714	1.43352	1	1	0	0	18.0864	18.1867	17.941	17.9071	17.9424	18.3791	18.4392	18.5279	18.0273	17.9256	18.1825	-0.20641	-0.40361	0.136765	0.015921
PMI_020547		XP_022086069.1 calpain-B-like isoform X1 [Acanthaster planci] (id=65.56%; len=180; e=2.47E-70)			6.191	0.7953	0.089829	28	13	2	0	23.0679	23.1815	23.0231	22.9288	23.0799	23.3652	23.4111	23.5193	23.0795	22.9981	23.0079	-0.114072	-0.403363	0.243608	0.00384402
PMI_028472; PMI_027840		XP_002117832.1 expressed hypothetical protein [Trichoplax adhaerens] (id=80.00%; len=55; e=6.93E-22) ; XP_002117832.1 expressed hypothetical protein [Trichoplax adhaerens] (id=48.35%; len=91; e=3.35E-14)	803	1	2.447	0.3463	1.12114	2	1	0	0	21.3392	21.3867	21.142	21.5841	21.7342	22.1132	22.2686	22.3053	22.1846	21.5406	21.7562	0.123798	-0.40192	0.559193	0.158881
PMI_011415		XP_022104684.1 spatacsin-like isoform X3 [Acanthaster planci] (id=82.92%; len=1920; e=0.00E+00)			2.46	0.4565	0.957709	2	2	1	1	18.0226	18.172	17.9087	17.5683	17.4308	17.5359	17.5645	17.3564	16.8581	17.0456	17.3531	-0.461356	-0.400002	0.0684972	0.0921992
m.7458	Background_P	FUCL5_ANGJA_Fucolectin-5			5.319	0.7486	0.28537	34	6	6	0	25.1645	25.3936	25.097	25.1562	25.2894	25.7632	25.7855	25.7651	25.4092	25.3115	25.3932	-0.0982196	-0.399928	0.544404	0.00394872
m.22987; m.44365; m.44356; PMI_025355; PMI_019538	Pmi_641151_Z; 66520; 66514; None; None	ZGPAT_NEMVE_Zinc_finger_CCCH-type_with_G_patch_domain-con..CUT; XP_022107941.1 zinc finger CCCH-type with G patch domain-containing protein-like [Acanthaster planci] (id=73.94%; len=587; e=0.00E+00) ; XP_022107941.1 zinc finger CCCH-type with G patch domain-containing protein-like [Acanthaster planci] (id=73.08%; len=587; e=0.00E+00) ; XP_022107941.1 zinc finger CCCH-type with G patch domain-cont…	2675	1	4.707	0.6896	1.16376	1	1	0	0	13.9192	13.897	13.9504	13.9021	13.6028	14.056	13.855	13.5618	13.2626	13.3423	13.6723	-0.0896474	-0.398514	0.496656	0.105937
m.6795	Pmi_511230_K	KTNA1_STRPU_Katanin_p60_ATPase-containing_subunit			3.904	0.7244	0.989676	6	4	0	3	18.6971	18.5686	18.4485	18.4438	18.6822	19.0629	19.0206	19.0596	18.7243	18.6319	18.5945	-0.108017	-0.397459	0.366986	0.00486607
PMI_027735; PMI_026740; m.30318	None; None; 45127	XP_002736864.1 PREDICTED: CD63 antigen-like [Saccoglossus kowalevskii] (id=44.00%; len=75; e=3.09E-06) ; KXJ08770.1 Tetraspanin-11 [Exaiptasia pallida] (id=39.29%; len=168; e=5.78E-19) ; XP_022111920.1 CD63 antigen-like [Acanthaster planci] (id=67.66%; len=235; e=8.70E-93)	1185	1	1.622	0.3853	0.893845	2	1	0	0	20.7115	20.1167	19.9417	20.4448	20.1034	21.1039	20.8215	21.2188	20.9636	20.6773	20.3123	-0.250857	-0.396979	0.550136	0.162291
PMI_020094; PMI_022903; m.24402	None; None; 34832	XP_022089423.1 probable phosphomannomutase isoform X1 [Acanthaster planci] (id=85.12%; len=215; e=1.18E-133) ; XP_022089423.1 probable phosphomannomutase isoform X1 [Acanthaster planci] (id=79.92%; len=254; e=8.09E-146) ; XP_022089423.1 probable phosphomannomutase isoform X1 [Acanthaster planci] (id=85.43%; len=254; e=1.04E-162)	1990	1	3.546	0.5028	1.04016	1	1	0	0		12.8473	12.3075	13.0181	13.1147	13.3043	13.346	13.0272	12.6145	12.9123	12.9712	-0.033887	-0.393135		0.0582334
m.9952; PMI_009568; m.21454	15069; None; Pmi_634531_F	XP_022090813.1 chromatin target of PRMT1 protein-like [Acanthaster planci] (id=72.04%; len=93; e=8.56E-33) ; XP_022090813.1 chromatin target of PRMT1 protein-like [Acanthaster planci] (id=74.33%; len=300; e=1.59E-80) ; FOP_RAT_Friend_of_PRMT1_protein	2778	1	1.66	0.4247	0.974022	2	1	0	0	16.3816	16.3948	16.0955	15.9996	16.1556	16.5507	16.8584	16.7834	16.0266	16.5765	16.412	-0.304633	-0.392507	0.0197496	0.122414
m.31403	Pmi_669355_Z	ZZEF1_MOUSE_Zinc_finger_ZZ-type_and_EF-hand_domain-containin..CUT			5.807	0.7424	1.72176	1	1	1	0	15.8264	16.1832	15.8463	15.8819	15.669	15.9713	16.2707	16.1287	15.5992	15.6851	15.9091	-0.205719	-0.392455	0.442165	0.036359
m.15533; m.24760	20907; Pmi_648004_n	XP_022101588.1 uncharacterized protein LOC110985120 [Acanthaster planci] (id=51.78%; len=450; e=4.68E-131) ; no_annot	1317	1	4.481	0.746	2.27257	1	1	0	0	16.441	16.2788	16.0079	15.7296	15.9835	16.0331	16.4666	16.191	15.6234	16.0154	15.8771	-0.452921	-0.391633	0.0366229	0.084369
m.18483; m.45766	Pmi_620070_D; 68583	DOXA1_HUMAN_Dual_oxidase_maturation_factor_1; XP_022094628.1 dual oxidase maturation factor 1-like isoform X1 [Acanthaster planci] (id=87.81%; len=320; e=0.00E+00)	866	4	3.79	0.6332	0.834358	4	4	0	0	19.1514	19.0381	18.8704	19.0269	19.0194	19.0149	19.5899	19.5219	19.0896	19.0138	18.8513	-0.122481	-0.390675	0.225386	0.152676
PMI_018932		XP_022109893.1 erythrocyte band 7 integral membrane protein-like [Acanthaster planci] (id=93.07%; len=231; e=1.45E-142)			6.268	0.8125	0.20178	32	8	0	8	23.3501	23.1732	23.1049	23.2388	23.2355	23.9025	23.8425	23.8949	23.5681	23.4715	23.4301	-0.068564	-0.390073	0.578682	0.004125
m.39303; m.39293	59350; 59342	XP_022105242.1 ribosome-binding protein 1-like isoform X2 [Acanthaster planci] (id=60.14%; len=143; e=1.58E-38) ; XP_022105242.1 ribosome-binding protein 1-like isoform X2 [Acanthaster planci] (id=75.17%; len=145; e=8.95E-58)	1160	5	5.286	0.6674	0.699119	9	7	0	3	21.76	21.9117	21.7481	21.6937	21.6877	22.1767	22.1918	22.2397	21.8745	21.7295	21.8368	-0.126	-0.389133	0.332371	0.00525909
m.26641	38714	XP_022087032.1 ras suppressor protein 1-like [Acanthaster planci] (id=89.26%; len=270; e=2.01E-178)			4.881	0.6773	0.840283	7	7	0	7	20.9873	20.9558	20.9949	20.4804	20.8248	20.9359	21.126	21.0607	20.543	20.7403	20.6843	-0.204811	-0.38504	0.308151	0.00899303
PMI_022986; PMI_017516; m.32600	None; None; 48727	PNI23864.1 RPS5 isoform 3 [Pan troglodytes] (id=88.46%; len=130; e=4.96E-77) ; XP_022106298.1 40S ribosomal protein S5 [Acanthaster planci] (id=97.57%; len=206; e=1.42E-147) ; XP_022106298.1 40S ribosomal protein S5 [Acanthaster planci] (id=97.57%; len=206; e=2.80E-147)	2250	5	3.614	0.6071	0.446967	17	5	0	0	23.343	23.2681	23.274	22.9359	22.9415	23.1559	23.1891	23.2791	23.0485	22.7251	22.6961	-0.255065	-0.384783	0.140734	0.0646583
PMI_025305		XP_022108206.1 uncharacterized protein LOC110988727 [Acanthaster planci] (id=46.26%; len=428; e=1.38E-100)			2.238	0.2998	1.63065	1	1	1	0	16.0712	16.7001	16.339	16.3266	16.2684	17.1189	16.9772	16.7762	15.8338	16.7593	17.131	-0.0742979	-0.38271	0.852338	0.427647
m.26740; m.26737; m.24304; PMI_018471	38886; 38884; Pmi_646221_M; None	XP_022090265.1 7SK snRNA methylphosphate capping enzyme-like [Acanthaster planci] (id=68.99%; len=761; e=0.00E+00) ; XP_022090265.1 7SK snRNA methylphosphate capping enzyme-like [Acanthaster planci] (id=68.32%; len=483; e=0.00E+00) ; MEPCE_MOUSE_7SK_snRNA_methylphosphate_capping_enzyme; XP_022090265.1 7SK snRNA methylphosphate capping enzyme-like [Acanthaster planci] (id=68.70%; len=706; e=0.00E+…	2776	1	2.145	0.4704	1.00831	1	1	0	0	13.8662	14.2429	14.5004	14.1839	14.4325	14.6943	13.8395	14.5806	13.875	14.0757	14.0183	0.317737	-0.381831	0.305947	0.288393
m.28689; PMI_012457	Pmi_661310_W; None	WDR66_HUMAN_WD_repeat-containing_protein_66; XP_022086386.1 cilia- and flagella-associated protein 251-like [Acanthaster planci] (id=75.47%; len=852; e=0.00E+00)	2257	2	2.02	0.5518	1.03745	2	2	0	2	16.9719	17.182	16.9728	16.9105	16.6806	17.1369	17.1423	17.024	16.6944	16.7532	16.7114	-0.22228	-0.381439	0.229222	0.00383304
PMI_008451		XP_022093057.1 uncharacterized protein LOC110980557 [Acanthaster planci] (id=49.33%; len=1415; e=0.00E+00)			3.32	0.7599	0.469288	1	1	1	0	13.1581	13.0448	12.7499	12.6768	12.9115	13.1209	13.2429	12.9758	12.5186	12.7235	12.9537	-0.322046	-0.381279	0.0380411	0.0734767
PMI_000878; m.11314	None; Pmi_569190_R	XP_022080471.1 60S ribosomal protein L14-like [Acanthaster planci] (id=90.70%; len=129; e=2.09E-72) ; RL14_RAT_60S_ribosomal_protein_L14	1436	11	4.748	0.6718	0.837547	21	11	0	7	24.6731	24.6345	24.4934	24.3949	24.4395	24.8271	24.8959	24.9141	24.7015	24.4768	24.3159	-0.211193	-0.380955	0.0087319	0.0693261
PMI_020514		XP_022111462.1 iron-sulfur protein NUBPL-like isoform X1 [Acanthaster planci] (id=84.29%; len=191; e=2.92E-104)			4.293	0.7228	1.13137	7	6	0	1	21.1656	21.2729	21.0663	21.0751	21.0489	21.3315	21.6802	21.7266	21.2666	21.1614	21.1693	-0.155849	-0.380363	0.204957	0.0837654
PMI_000361		XP_022084962.1 polypeptide N-acetylgalactosaminyltransferase 1-like [Acanthaster planci] (id=86.62%; len=441; e=0.00E+00)			2.033	0.4171	2.71963	1	1	1	0	18.1681	17.9303	18.1973	17.6971	18.362	18.441	18.4011	18.4432	17.378	18.2442	18.5226	0.0363214	-0.380137	0.886046	0.384995
m.11096	Pmi_567011_K	K1751_MOUSE_Uncharacterized_protein_KIAA1751_homolog			3.12	0.5785	1.06844	3	3	0	3	16.6984	16.9999	16.46	16.2465	16.5136	16.6546	16.711	16.8125	16.4316	16.4208	16.1866	-0.442485	-0.379708	0.152838	0.0229376
m.6191	10196	XP_022100693.1 vacuolar protein sorting-associated protein 13A-like [Acanthaster planci] (id=90.31%; len=609; e=0.00E+00)			2.865	0.7016	0.068834	1	1	1	0	13.929	14.423	13.7146	13.7951	13.6136	14.2861	14.2313	14.4992	14.0467	13.9455	13.888	-0.468273	-0.37884	0.298571	0.0247474
m.22360	31095	XP_022786481.1 mechanosensory protein 2-like isoform X2 [Stylophora pistillata] (id=79.83%; len=114; e=3.68E-59)			6.268	0.8125	0.20178	26	6	0	3	23.2172	22.9831	23.0092	23.1603	23.108	23.7664	23.6931	23.7619	23.4392	23.363	23.2841	-0.00768418	-0.378374	0.959142	0.00474116
m.20630	Pmi_630813_A	ANK3_HUMAN_Ankyrin-3			3.684	0.7033	1.12687	4	3	0	3	19.9458	19.8649	20.0291	19.7597	19.8545	20.069	20.137	20.3385	19.8513	19.8004	19.7589	-0.0242566	-0.377925	0.803336	0.0326657
m.12150	Pmi_576930_Y	YIEF_ECO57_Uncharacterized_protein_yieF_>gi			5.461	0.7155	0.6597	7	4	0	4	21.8026	21.6811	21.8395	21.4794	21.706	21.9701	21.8503	21.8898	21.4737	21.5531	21.5512	-0.0668586	-0.377411	0.621243	0.00143225
m.17084	Pmi_612025_F	FLOT2_HUMAN_Flotillin-2			5.873	0.739	0.37005	22	16	3	13	22.2651	22.2566	22.2099	22.2677	22.2612	22.469	22.7184	22.7181	22.2353	22.2764	22.2634	-0.0145827	-0.376779	0.511529	0.0427706
m.50680; m.5873	75868; Pmi_493831_D	XP_022096135.1 uncharacterized protein LOC110982186 [Acanthaster planci] (id=80.00%; len=95; e=7.94E-47) ; DMBT1_HUMAN_Deleted_in_malignant_brain_tumors_1_protein	885	1	2.493	0.6033	1.20973	2	1	0	0	16.3048	16.2766	15.9536	15.9519	15.996	16.5454	16.4478	16.5741	15.9367	16.2196	16.2871	-0.323564	-0.374638	0.000926329	0.0598792
PMI_000207		XP_022102069.1 neutral cholesterol ester hydrolase 1-like [Acanthaster planci] (id=72.52%; len=393; e=0.00E+00)			5.242	0.7209	0.312213	3	3	2	1	18.3881	18.4074	18.3064	18.2614	18.3043	18.5251	18.87	18.8315	18.4206	18.3133	18.3689	-0.107059	-0.374568	0.00899405	0.0658729
m.21448	Pmi_634580_S	SEM2A_SCHGR_Semaphorin-2A			5.075	0.7692	1.08456	6	5	0	5	19.8594	19.8188	19.6686	19.6542	19.621	19.9012	20.0542	20.2287	19.7987	19.6746	19.5907	-0.191161	-0.373371	0.0171338	0.0372984
PMI_027036; m.18662; PMI_029116; m.13516	None; 24578; None; Pmi_588120_C	AEM00019.1 cathepsin X [Patiria pectinifera] (id=94.16%; len=257; e=3.76E-179) ; AEM00019.1 cathepsin X [Patiria pectinifera] (id=98.31%; len=296; e=0.00E+00) ; AEM00019.1 cathepsin X [Patiria pectinifera] (id=100.00%; len=151; e=5.82E-109) ; CATZ_BOVIN_Cathepsin_Z	70	1	3.334	0.6518	1.03383	1	1	0	0	13.6694	13.5827	14.1045	13.2953	13.2756	13.536	13.938	13.9565	13.3209	13.3659	13.6257	-0.067548	-0.372667	0.828817	0.097597
PMI_012936		BAR92639.1 ApMIF2 protein [Patiria pectinifera] (id=91.80%; len=122; e=2.53E-76)			4.978	0.7654	0.691663	5	3	1	2	19.8468	20.2225	19.6019	20.1211	19.7229	20.8703	21.2096	21.246	20.5391	20.7591	20.9106	-0.219309	-0.372367	0.453338	0.0825597
PMI_022399; PMI_005145; m.28582	None; None; Pmi_660902_A	XP_022081843.1 activating signal cointegrator 1 complex subunit 3-like [Acanthaster planci] (id=80.19%; len=717; e=0.00E+00) ; XP_022081843.1 activating signal cointegrator 1 complex subunit 3-like [Acanthaster planci] (id=80.75%; len=717; e=0.00E+00) ; ASCC3_CHICK_Activating_signal_cointegrator_1_complex_subunit_3	617	3	3.743	0.5094	0.834251	3	3	0	0	18.4838	18.5949	18.3962	18.5344	18.5053	19.2088	19.3187	18.871	18.7502	18.5609	18.9748	-0.060707	-0.370872	0.470787	0.109602
m.18670; PMI_008813	Pmi_621080_C; None	CCD19_HUMAN_Coiled-coil_domain-containing_protein_19,_mit..CUT; XP_022097044.1 cilia- and flagella-associated protein 45-like [Acanthaster planci] (id=89.11%; len=551; e=0.00E+00)	548	4	2.79	0.6559	0.809862	4	4	0	4	19.2522	19.2959	19.2049	18.8611	19.1408	19.5004	19.3292	19.3611	18.9924	18.9771	19.1094	-0.205077	-0.370579	0.187594	0.00608603
m.42115	63692	XP_022106613.1 peptidyl-glycine alpha-amidating monooxygenase-like [Acanthaster planci] (id=73.01%; len=941; e=0.00E+00)			2.799	0.6427	1.50849	2	2	0	1	18.2168	18.3846	18.0617	17.7895	17.802	18.2335	18.3135	17.8963	17.3792	17.9737	17.9802	-0.416275	-0.370037	0.0478369	0.205152
m.20914; PMI_014391	Pmi_632130_U; None	UBE2S_BRAFL_Ubiquitin-conjugating_enzyme_E2_S; XP_022093566.1 ubiquitin-conjugating enzyme E2 S-like [Acanthaster planci] (id=97.18%; len=213; e=3.68E-151)	648	1	6.566	0.7645	0.426148	1	1	0	0	12.0476	11.9103	12.3741	12.9583	12.447	12.4312	12.1506	12.6063	12.1962	11.7921	12.0897	0.614224	-0.369995	0.0664027	0.108968
PMI_024622		XP_022106613.1 peptidyl-glycine alpha-amidating monooxygenase-like [Acanthaster planci] (id=50.98%; len=406; e=3.56E-119)			3.363	0.6964	0.450353	2	2	0	1	17.8469	18.0882	17.6704	17.2002	17.4762	17.9134	17.9451	17.4366	17.0253	17.5291	17.6307	-0.518585	-0.36998	0.0691071	0.212915
PMI_021786		XP_022086656.1 uncharacterized protein LOC110977121 isoform X3 [Acanthaster planci] (id=58.37%; len=920; e=0.00E+00)			6.324	0.7736	0.122913	7	6	1	1	20.0492	20.2216	19.9154	20.0151	20.181	20.5237	20.7401	20.6577	20.2936	20.2443	20.2739	-0.0982251	-0.369904	0.471066	0.0232518
m.4987	Pmi_475871_D	DC2L1_MOUSE_Cytoplasmic_dynein_2_light_intermediate_chain_1			2.066	0.4318	1.5774	2	2	2	0	18.2144	18.3331	17.9162	17.9312	17.9622	18.602	18.6561	18.6552	18.4213	18.1633	18.2264	-0.337225	-0.367443	0.0969392	0.0362086
PMI_014437		XP_022088030.1 glypican-5-like [Acanthaster planci] (id=86.23%; len=363; e=0.00E+00)			2.776	0.3602	0.787259	1	1	1	0	13.175	12.2477	12.9008	12.7629	13.1401	13.0672	12.936	12.7639	12.0821	13.0053	12.5776	0.223226	-0.367351	0.714582	0.300899
PMI_028714		XP_022094891.1 60S ribosomal protein L35-like [Acanthaster planci] (id=93.50%; len=123; e=7.89E-73)			4.391	0.7187	0.7674	18	7	7	0	21.7436	21.9215	21.6019	22.0144	21.9276	22.4723	22.5304	22.7232	22.7974	21.9194	21.9075	0.0153947	-0.367223	0.926612	0.338396
m.24022	33967	WP_051725661.1 HAMP domain-containing histidine kinase [Bacillus gaemokensis] (id=24.36%; len=78; e=8.20E+00)			1.862	0.3861	1.84184	2	1	1	0	18.9564	19.032	18.7708	18.4586	18.6139	19.2251	19.5043	18.4789	17.5763	19.0586	19.4757	-0.379769	-0.365899	0.0387651	0.6136
m.16996	Pmi_611630_R	RM24_DANRE_Probable_39S_ribosomal_protein_L24,_mitochondrial			5.34	0.7818	0.771259	9	5	1	4	20.4427	20.2105	20.2462	20.1996	20.3431	20.7233	20.5665	20.5569	20.1914	20.2739	20.2844	-0.0636673	-0.365666	0.681622	0.00867725
PMI_008749		XP_022099297.1 laminin subunit beta-1-like [Acanthaster planci] (id=79.93%; len=269; e=5.62E-94)			3.664	0.6817	1.26619	3	3	0	0	18.1092	18.5582	18.1631	17.915	17.9391	18.0735	18.3345	18.4176	17.6713	18.3604	17.6979	-0.327961	-0.365351	0.363831	0.243153
PMI_011702; m.28778; m.24327; PMI_005966	None; 42548; Pmi_646320_M; None	XP_022095906.1 meiosis expressed gene 1 protein homolog [Acanthaster planci] (id=80.68%; len=88; e=5.00E-46) ; XP_022095906.1 meiosis expressed gene 1 protein homolog [Acanthaster planci] (id=80.68%; len=88; e=4.14E-46) ; MEIG1_NEMVE_Meiosis_expressed_gene_1_protein_homolog; XP_022095906.1 meiosis expressed gene 1 protein homolog [Acanthaster planci] (id=80.23%; len=86; e=2.37E-43)	2439	1	2.234	0.2413	2.18146	1	1	0	0	18.0313	17.9795	17.865	17.4691	17.4804	17.6512	17.9055	17.837	17.6975	17.4905	17.1154	-0.40059	-0.363466	0.0861962	0.154235
m.2682	4820	XP_011664529.1 PREDICTED: transposon Ty3-I Gag-Pol polyprotein [Strongylocentrotus purpuratus] (id=66.67%; len=117; e=5.67E-50)			1.605	0.3227	0.015319	2	1	1	0	20.2821	20.3825	20.1936	19.8002	19.9308	19.5146	19.9574	19.81	19.5025	19.4549	19.2347	-0.357403	-0.363317	0.0766755	0.0897886
PMI_001204		XP_022089006.1 U6 snRNA-associated Sm-like protein LSm2 [Acanthaster planci] (id=100.00%; len=95; e=1.36E-63)			1.795	0.3482	0.941241	1	1	1	0	16.3713	15.9386	15.9336	16.5781	16.3553	16.9668	16.943	16.9305	16.4151	16.8401	16.4955	0.134051	-0.363176	0.679662	0.107337
PMI_005525		XP_022096990.1 dual oxidase maturation factor 1-like [Acanthaster planci] (id=80.99%; len=263; e=1.28E-155)			1.573	0.3389	1.90837	2	1	1	0	19.907	19.9978	20.1244	20.2831	20.0867	20.3317	20.2143	20.277	20.012	19.9677	19.7566	0.212369	-0.362285	0.0672087	0.0294908
PMI_003177		XP_022088097.1 profilin-1A-like [Acanthaster planci] (id=85.42%; len=144; e=9.65E-87)			4.546	0.6344	0.336814	5	3	1	2	17.6544	18.1091	17.6253	17.7686	17.6943	18.4222	18.1006	18.2186	17.6488	17.8868	18.1226	-0.185683	-0.361071	0.562182	0.103965
m.27939	40922	XP_022082796.1 zinc finger protein 830-like [Acanthaster planci] (id=73.45%; len=226; e=3.52E-106)			4.056	0.7066	1.36978	3	2	1	1	16.3905	16.3199	16.4924	16.2512	16.5457	16.4826	16.9803	16.899	16.1584	16.6248	16.4957	0.0745395	-0.360981	0.508329	0.15778
PMI_012647		XP_022092771.1 uncharacterized protein LOC110980418 isoform X4 [Acanthaster planci] (id=82.04%; len=1342; e=0.00E+00)			2.81	0.5776	1.45575	2	2	0	2	16.8267	17.0173	16.6529	16.9465	16.8373	16.8307	16.9209	16.9986	16.5878	16.7487	16.331	-0.109787	-0.360937	0.466798	0.0818514
m.29009; m.15966	Pmi_662260_C; 21303	CADN_DROME_Neural-cadherin; BAC06834.1 Ap-cadherin [Patiria pectinifera] (id=94.47%; len=1085; e=0.00E+00)	833	4	3.617	0.7542	0.485593	4	4	0	0	17.1367	17.2934	17.109	16.8715	17.0107	17.3848	17.5166	17.5842	17.3636	17.0955	16.9477	-0.217988	-0.359558	0.149409	0.0796512
m.22335	Pmi_638372_G	GLBL2_MOUSE_Beta-galactosidase-1-like_protein_2			4.682	0.7269	0.763158	18	15	7	0	22.3939	22.4283	22.3279	22.3603	22.3494	22.5289	22.6804	22.9703	22.3596	22.4414	22.3018	-0.0652235	-0.358928	0.104787	0.098231
PMI_005249		XP_022100387.1 PDZ and LIM domain protein 5-like isoform X1 [Acanthaster planci] (id=42.93%; len=198; e=9.03E-27)			2.877	0.561	0.998275	1	1	1	0	12.713	13.0207		12.2585	12.3762	12.9224	13.9661	13.6655	13.3265	12.9923		-0.5495	-0.358559	0.139499	0.387294
m.29670; m.12907	44085; Pmi_583210_S	XP_022087655.1 sulfite oxidase-like [Acanthaster planci] (id=76.58%; len=380; e=0.00E+00) ; SUOX_CHICK_Sulfite_oxidase	1259	1	2.083	0.4695	2.07381	1	1	0	0	15.6529	15.9988	15.6097	15.8439	15.6654	16.1412	16.1716	16.3352	16.1851	15.6117	15.7785	-0.119569	-0.357589	0.613883	0.160486
m.40637	61361	XP_010486078.1 PREDICTED: long chain acyl-CoA synthetase 6, peroxisomal [Camelina sativa] (id=31.96%; len=97; e=4.00E-02)			2.085	0.2676	2.71901	1	1	1	0	20.6128	20.4066	20.4698	20.0318	20.0107	20.7301	20.8193	20.0624	19.3878	20.2466	20.9064	-0.338893	-0.357007	0.159099	0.525695
m.22182; PMI_024959; m.29679	30802; None; Pmi_664475_D	XP_022103981.1 dystroglycan-like [Acanthaster planci] (id=84.78%; len=322; e=0.00E+00) ; XP_022103981.1 dystroglycan-like [Acanthaster planci] (id=78.80%; len=816; e=0.00E+00) ; DAG1_BOVIN_Dystroglycan	472	2	3.717	0.6755	0.723163	2	2	0	0	15.0652	16.4087	16.0793	16.5513	16.5726	16.9439	16.7444	16.8028	16.1496	16.7942	16.4771	0.664133	-0.356758	0.498757	0.187636
PMI_014648		XP_007864577.1 RNA-binding domain-containing protein [Gloeophyllum trabeum ATCC 11539] (id=58.97%; len=78; e=5.67E-24)			6.273	0.7912	0.109662	34	5	1	4	24.4152	24.5374	24.3832	24.264	24.4266	24.6267	24.8279	24.7595	24.3714	24.3747	24.3981	-0.118366	-0.356624	0.256782	0.0244508
m.19231	Pmi_623990_P	PTK7_CHICK_Inactive_tyrosine-protein_kinase_7			1.641	0.4819	0.53189	2	2	2	0	16.7585	16.7913	16.2911	16.4299	16.3372	16.9917	16.9348	17.0231	16.5109	16.8344	16.5357	-0.422122	-0.356183	0.00446626	0.0679561
m.43100; m.43095; m.23941	64772; 64769; Pmi_644752_n	XP_022080986.1 mucin-17-like isoform X3 [Acanthaster planci] (id=52.50%; len=400; e=6.09E-115) ; XP_022080986.1 mucin-17-like isoform X3 [Acanthaster planci] (id=54.01%; len=387; e=1.17E-116) ; no_annot	2284	7	4.865	0.6776	0.534494	9	7	0	0	21.2061	21.2663	21.154	21.0208	21.1496	21.4135	21.6709	21.5977	21.2459	21.219	21.1615	-0.128034	-0.351898	0.094721	0.0340829
m.6546	Pmi_506921_n	no_annot			4.282	0.7954	0.35084	2	2	2	0	17.4844	17.1903	16.9777	17.6529	17.8116	18.2033	18.0496	17.9661	17.5847	17.6493	17.9324	0.143397	-0.350882	0.661089	0.0605416
m.3934	Pmi_443940_L	LEG4_HUMAN_Galectin-4			3.864	0.6636	0.464826	7	4	1	3	20.7989	21.0048	20.7217	20.9945	21.1475	21.1857	21.4222	21.4885	21.3408	20.8921	20.8125	0.0527327	-0.350315	0.766035	0.155842
m.28338	41681	XP_022111461.1 flotillin-1-like [Acanthaster planci] (id=95.32%; len=427; e=0.00E+00)			4.976	0.7454	0.697991	29	21	3	17	23.1129	23.1268	22.9918	23.0935	23.075	23.3527	23.5721	23.6601	23.2077	23.1518	23.1798	-0.066411	-0.348577	0.162607	0.058354
m.26925; PMI_008032	39173; None	XP_022083613.1 protein lin-7 homolog C-like [Acanthaster planci] (id=98.06%; len=206; e=1.39E-146) ; XP_022083613.1 protein lin-7 homolog C-like [Acanthaster planci] (id=92.57%; len=148; e=3.03E-84)	1584	3	4.299	0.6867	0.080799	5	3	0	1	19.3887	19.3308	19.3661	19.4117	19.4153	19.8421	20.0799	19.8682	19.4533	19.7113	19.5804	0.0379383	-0.348389	0.391958	0.0302488
m.39171	59224	XP_022111466.1 60S ribosomal protein L28-like [Acanthaster planci] (id=88.73%; len=142; e=7.89E-87)			6.095	0.7203	0.524401	34	10	3	7	24.2878	24.3849	24.1115	24.0572	24.1455	24.5205	24.6174	24.604	24.3036	24.1496	24.2484	-0.231599	-0.346783	0.0771319	0.00479505
m.31829	Pmi_670302_n	no_annot			3.746	0.7499	0.696129	5	4	1	3	18.6942	18.5904	18.3635	18.346	18.5549	18.9032	18.8332	18.9204	18.5582	18.5414	18.518	-0.220794	-0.346379	0.080499	0.00195826
m.22543	Pmi_639263_n	no_annot			6.411	0.8209	1.21513	2	2	0	1	17.9056	17.7811	17.6405	17.8116	17.801	17.8525	18.3405	18.2813	17.7929	17.8221	17.8228	-0.0923432	-0.345473	0.36465	0.153155
m.16559	Pmi_608810_M	MYO1F_HUMAN_Unconventional_myosin-If			4.045	0.6039	0.547761	6	4	2	0	20.6459	20.7385	20.6518	20.5804	20.7385	21.0802	21.1767	21.1231	20.7242	20.7893	20.8307	-0.035293	-0.345272	0.629787	0.00122078
m.24124	Pmi_645502_G	GAR1_DANRE_H/ACA_ribonucleoprotein_complex_subunit_1			3.482	0.5659	0.906004	2	1	1	0	18.7433	18.9125	18.7154	18.7102	18.6893	18.8021	18.9362	18.9357	18.6202	18.5556	18.4627	-0.122935	-0.345221	0.382011	0.00567924
m.13629; PMI_025588	Pmi_588930_S; None	SPC24_XENLA_Kinetochore_protein_Spc24; XP_022103615.1 kinetochore protein spc24-like [Acanthaster planci] (id=80.68%; len=207; e=9.08E-117)	1376	6	4.552	0.6706	0.347639	7	6	0	5	20.9126	20.8974	20.8088	20.9695	20.9372	21.3428	21.3632	21.2678	20.9954	20.8772	21.0699	0.00018969	-0.34377	0.997286	0.0121879
PMI_013907; m.16576; PMI_014428	None; Pmi_608891_D; None	XP_022111974.1 dipeptidyl aminopeptidase-like protein 6 [Acanthaster planci] (id=80.57%; len=669; e=0.00E+00) ; DPP4_RAT_Dipeptidyl_peptidase_4; XP_022111974.1 dipeptidyl aminopeptidase-like protein 6 [Acanthaster planci] (id=76.20%; len=769; e=0.00E+00)	2679	1	2.838	0.6018	0.647251	1	1	0	0	15.4436	15.3109	15.4229	15.6493	15.0788	15.9057	15.8121	15.5945	15.5391	15.8178	14.9244	0.00640392	-0.343691	0.974008	0.322696
m.21037	28854	XP_022098077.1 apoptotic chromatin condensation inducer in the nucleus-like [Acanthaster planci] (id=84.24%; len=165; e=1.37E-80)			3.507	0.6496	1.85848	1	1	1	0	16.3362	16.658	16.029	16.0703	16.7296	16.8911	16.7738	16.5748	16.5105	16.4917	16.2102	-0.220822	-0.342474	0.485313	0.0630656
PMI_018188		XP_022087764.1 angiotensin-converting enzyme-like [Acanthaster planci] (id=74.81%; len=385; e=0.00E+00)			4.421	0.7313	0.233164	4	4	1	3	18.429	18.361	18.3228	18.363	18.5082	18.4886	18.7236	18.7849	18.351	18.3482	18.2722	0.00298236	-0.341912	0.966736	0.0538776
PMI_011266		XP_022090039.1 NAD kinase-like isoform X2 [Acanthaster planci] (id=88.29%; len=427; e=0.00E+00)			3.695	0.6271	1.51498	1	1	1	0	15.4703	15.3473	15.5667	15.57	15.8508	15.8816	15.6805	16.0966	15.4623	15.5962	15.5765	0.2537	-0.341196	0.109826	0.0920078
m.2309; PMI_015638	Pmi_376350_P; None	PORED_XENTR_Probable_polyprenol_reductase; XP_022109396.1 polyprenol reductase-like [Acanthaster planci] (id=75.88%; len=228; e=1.08E-131)	1482	1	1.375	0.3876	0.925927	1	1	0	0	18.1419	18.0652	18.2442	18.2632	18.1835	18.5138	18.4002	18.3081	18.0152	17.9689	18.2153	0.126767	-0.340873	0.120255	0.026182
m.29152; m.22068	43186; Pmi_637060_M	XP_022103815.1 diphthine--ammonia ligase-like isoform X1 [Acanthaster planci] (id=73.21%; len=489; e=0.00E+00) ; MUG71_SCHPO_Meiotically_up-regulated_gene_71_protein	1341	1	3.957	0.5135	1.24072	1	1	0	0	13.5563	13.8016	13.1545	13.3515	13.075	13.0359	13.5491	13.1285	13.0364	12.8633	12.792	-0.485283	-0.340649	0.0866669	0.151055
PMI_017969		XP_006188182.1 PREDICTED: mitochondrial import receptor subunit TOM6 homolog [Camelus ferus] (id=56.41%; len=39; e=1.52E-04)			3.919	0.6716	1.39438	1	1	1	0	15.7762	15.9478	15.9145	16.1145	16.1986	16.3483	16.1681	16.296	15.8839	16.2183	15.6885	0.213878	-0.34056	0.185956	0.148066
PMI_016494		XP_022099983.1 DNA repair protein REV1-like isoform X2 [Acanthaster planci] (id=58.71%; len=465; e=1.41E-144)			1.134	0.2857	2.49003	1	1	1	0	18.6954	19.3732	18.4284	18.4058	18.4602	19.0251	19.2797	18.7408	18.0905	18.7035	19.2302	-0.6028	-0.340429	0.325551	0.422213
PMI_019246; m.21228; PMI_010656	None; Pmi_633520_A; None	XP_022109412.1 armadillo repeat-containing protein 8-like [Acanthaster planci] (id=74.60%; len=437; e=0.00E+00) ; ARMC8_BOVIN_Armadillo_repeat-containing_protein_8; XP_022109412.1 armadillo repeat-containing protein 8-like [Acanthaster planci] (id=95.12%; len=389; e=0.00E+00)	1004	2	2.588	0.4633	0.731598	2	2	0	0	17.3182	17.4023	17.0457	17.1644	17.0972	17.5974	17.7111	17.6157	17.3606	17.1729	17.3734	-0.257856	-0.339084	0.0321833	0.0181617
m.26227	38161	38161|g.26227 type:complete len:183 gc:universal 38161:329-877(+)			1.345	0.3212	2.58235	1	1	1	0	16.2719	16.0588	16.0988	15.6229	16.321	15.748	15.5881	15.6159	15.3336	15.4235	15.1785	-0.151131	-0.33883	0.56381	0.02197
m.22871	Pmi_640600_M	MEC2_CAEEL_Mechanosensory_protein_2			6.268	0.8125	0.20178	39	11	0	7	23.716	23.5393	23.5004	23.6587	23.6274	24.2052	24.1194	24.2123	23.9418	23.8337	23.7457	-0.0321746	-0.338537	0.785797	0.0128959
m.35419; m.14591; PMI_009172; PMI_016071	53351; Pmi_595890_P; None; None	XP_022105358.1 plexin-A4-like isoform X1 [Acanthaster planci] (id=77.59%; len=241; e=1.23E-106) ; PLXA4_MOUSE_Plexin-A4; XP_022105358.1 plexin-A4-like isoform X1 [Acanthaster planci] (id=68.04%; len=632; e=0.00E+00) ; XP_022105363.1 plexin-B-like isoform X3 [Acanthaster planci] (id=72.06%; len=136; e=4.16E-43)	2024	1	3.725	0.4387	0.968208	1	1	0	0	14.2985	15.2061	14.8181	14.8199	14.8103	15.1394	15.3531	15.2186	14.6133	14.9555	15.1288	0.0637807	-0.337849	0.911112	0.142751
PMI_007013		XP_022108101.1 small nuclear ribonucleoprotein Sm D1 [Acanthaster planci] (id=98.32%; len=119; e=7.08E-76)			3.999	0.6356	0.621926	2	1	1	0	18.5533	18.8465	18.7637	18.4679	18.6652	18.6917	19.1061	18.5886	18.2235	18.4946	18.6561	-0.0676474	-0.337371	0.735167	0.174278
PMI_003897; m.21074	None; Pmi_632800_I	XP_022091607.1 integrin-linked protein kinase-like [Acanthaster planci] (id=65.80%; len=462; e=0.00E+00) ; ILK_HUMAN_Integrin-linked_protein_kinase	1195	6	3.409	0.6793	0.039416	6	6	0	5	20.208	20.3028	20.1921	20.1963	20.233	20.5866	20.6461	20.5839	20.069	20.3233	20.4148	-0.0482333	-0.336505	0.488083	0.0777703
m.16366; PMI_009341; m.34914	Pmi_607721_H; None; 52664	HYEP_PIG_Epoxide_hydrolase_1; XP_022088767.1 epoxide hydrolase 1-like [Acanthaster planci] (id=83.22%; len=441; e=0.00E+00) ; XP_022088767.1 epoxide hydrolase 1-like [Acanthaster planci] (id=82.64%; len=432; e=0.00E+00)	1325	5	3.164	0.6558	0.784348	5	5	0	5	20.4326	20.5062	20.5168	20.2833	20.4317	20.5831	20.6284	20.5923	20.2205	20.2525	20.3232	-0.0588064	-0.335918	0.50595	0.00279172
PMI_020603; PMI_008721		EPB79172.1 core histone H2A/H2B/H3/H4 [Ancylostoma ceylanicum] (id=100.00%; len=103; e=3.99E-66) ; EPB79172.1 core histone H2A/H2B/H3/H4 [Ancylostoma ceylanicum] (id=97.09%; len=103; e=5.62E-62)	455	9	4.687	0.757	0.079075	40	9	0	9	24.7443	24.7892	24.7195	24.7248	24.7353	25.207	25.1531	25.2098	24.8202	24.9042	24.843	-0.0402322	-0.334194	0.31478	0.000662015
m.26236	Pmi_653400_R	RAP1B_XENLA_Ras-related_protein_Rap-1b			4.66	0.6692	1.15752	11	6	0	6	22.2749	22.0235	22.2102	22.0491	22.0827	22.2793	22.2197	22.2708	21.9356	21.9713	21.8615	-0.035159	-0.333804	0.829326	0.00228798
PMI_027571		XP_022109893.1 erythrocyte band 7 integral membrane protein-like [Acanthaster planci] (id=63.84%; len=271; e=1.22E-86)			6.268	0.8125	0.646954	22	5	0	2	23.1332	22.8542	22.9391	23.0711	23.058	23.6219	23.5253	23.5857	23.2961	23.2747	23.1683	0.0289914	-0.331249	0.870903	0.00345272
m.22289	Pmi_638181_R	RUNX1_MOUSE_Runt-related_transcription_factor_1			2.715	0.3565	1.94144	1	1	1	0	16.1287	17.1669	16.8453	16.3116	16.4448	16.8114	16.4529	16.4838	16.1544	16.4627	16.1387	-0.113881	-0.330774	0.863993	0.101513
m.18429; PMI_011883; m.30764	Pmi_619810_A; None; 45884	AMPN_BOVIN_Aminopeptidase_N; XP_022104263.1 aminopeptidase N-like isoform X3 [Acanthaster planci] (id=77.33%; len=300; e=3.13E-153) ; XP_022104264.1 aminopeptidase N-like isoform X4 [Acanthaster planci] (id=84.39%; len=173; e=1.77E-95)	2755	1	2.337	0.5576	1.73636	1	1	0	0	13.8567	14.2458	14.0311	14.1404	14.4597	14.5898	14.8271	14.699	13.8599	14.4862	14.7777	0.159147	-0.330699	0.569143	0.34611
m.21389; m.23451	29470; Pmi_642981_L	XP_022104220.1 large subunit GTPase 1 homolog [Acanthaster planci] (id=82.23%; len=242; e=1.31E-143) ; LSG1_CHICK_Large_subunit_GTPase_1_homolog	184	1	4.957	0.7111	0.195036	1	1	0	0	16.4719	16.7285	16.3313	16.2411	16.3502	16.6534	17.0054	17.0478	16.6689	16.6774	16.3691	-0.292655	-0.330421	0.245886	0.112283
m.14161	Pmi_592720_T	TOIP1_HUMAN_Torsin-1A-interacting_protein_1			2.892	0.5816	1.59208	1	1	1	0	16.7449	16.5072	16.8147	15.9333	16.2899	16.6401	16.7781	16.6823	15.9106	16.7319	16.4676	-0.280092	-0.330122	0.401316	0.304821
m.12797	Pmi_582320_n	no_annot			4.167	0.6931	0.999612	2	2	2	0	17.8944	17.982	17.8544	17.7882	17.9015	18.0343	18.0174	18.2871	17.8669	17.8907	17.5919	-0.0901745	-0.329714	0.235005	0.0642615
PMI_018456		XP_022092854.1 synaptotagmin-15-like [Acanthaster planci] (id=96.38%; len=304; e=0.00E+00)			1.616	0.3125	2.09249	1	1	1	0	19.3705	19.6447	19.2937	18.8553	19.0543	19.753	19.4616	19.4646	18.6745	19.168	19.8495	-0.439865	-0.329096	0.11627	0.438932
m.16064	21408	XP_022098688.1 DNA repair protein complementing XP-G cells-like isoform X3 [Acanthaster planci] (id=57.84%; len=835; e=0.00E+00)			1.385	0.2801	1.64312	1	1	1	0	15.6192	15.2401	15.9253	15.7894	15.8803	16.2721	15.7626	15.6133	15.1289	15.7459	15.7867	0.435335	-0.328819	0.249846	0.322842
PMI_030066		XP_022100017.1 neurofilament heavy polypeptide-like isoform X1 [Acanthaster planci] (id=64.63%; len=147; e=1.25E-46)			4.978	0.6454	1.06397	2	2	1	0	18.311	18.426	18.5866	18.472	18.5329	18.8833	18.6374	18.6597	18.3612	18.4142	18.4197	0.162014	-0.328447	0.157797	0.046172
PMI_004464; m.10052	None; Pmi_555521_C	XP_022082412.1 NADH dehydrogenase (ubiquinone) complex I, assembly factor 6-like isoform X2 [Acanthaster planci] (id=82.76%; len=319; e=0.00E+00) ; CH038_MOUSE_UPF0551_protein_C8orf38_homolog,_mitochondrial	1736	2	5.154	0.7256	1.30686	2	2	0	2	15.5812	15.7866	15.8685	14.5662	15.7897	15.7817	15.6366	15.6904	15.2145	15.5907	15.3208	-0.275788	-0.327566	0.584165	0.0852616
PMI_017168; m.8120; PMI_005794	None; Pmi_531221_R; None	XP_022100623.1 60S ribosomal protein L22-like [Acanthaster planci] (id=92.16%; len=102; e=4.79E-52) ; RL22_TRIGR_60S_ribosomal_protein_L22; XP_022100623.1 60S ribosomal protein L22-like [Acanthaster planci] (id=92.16%; len=102; e=4.29E-52)	1792	8	4.551	0.9094	0.094865	36	8	0	6	23.5224	23.7375	23.3666	23.5302	23.6002	23.9807	24.142	24.1412	23.8039	23.6847	23.7931	-0.130943	-0.327416	0.421231	0.00990683
m.12476	Pmi_579320_F	FKBP3_RABIT_Peptidyl-prolyl_cis-trans_isomerase_FKBP3			5.013	0.7117	0.191657	14	10	4	6	22.4098	22.4255	22.4056	22.3619	22.3949	22.5174	22.6894	22.7875	22.5015	22.3195	22.1931	-0.0301756	-0.326761	0.145622	0.0529201
m.4395	Pmi_461050_n	no_annot			6.06	0.7668	0.988504	3	2	2	0	18.7918	18.9776	18.6934	18.757	18.5351	19.1334	18.9681	19.1227	18.8387	18.6273	18.7805	-0.222844	-0.325917	0.18919	0.0177664
PMI_020325		PIK58376.1 hypothetical protein BSL78_04693, partial [Apostichopus japonicus] (id=46.54%; len=318; e=1.18E-72)			1.462	0.3324	0.345337	1	1	1	0	14.9805	15.1355	15.0102	15.7796	15.651	16.1679	16.3641	16.4632	15.9569	15.9492	16.1124	0.422238	-0.325583	0.2127	0.0429072
m.39015; m.39006; m.29956; PMI_008445	58935; 58931; Pmi_665330_C; None	XP_020930836.1 CLIP-associating protein 1 isoform X29 [Sus scrofa] (id=49.02%; len=1483; e=0.00E+00) ; XP_020930836.1 CLIP-associating protein 1 isoform X29 [Sus scrofa] (id=48.46%; len=1494; e=0.00E+00) ; CLAP1_XENTR_CLIP-associating_protein_1; XP_022108319.1 CLIP-associating protein 2-like isoform X3 [Acanthaster planci] (id=76.95%; len=742; e=0.00E+00)	638	1	2.883	0.3691	1.33595	1	1	0	0	16.4322	16.9885	17.1958	16.1729	16.8632	16.8221	17.1359	16.7677	16.0298	16.9525	16.7678	0.0336232	-0.32518	0.940158	0.373004
m.19413	Pmi_624850_n	no_annot			4.072	0.7335	0.513487	6	5	0	5	20.456	20.5428	20.4831	20.4649	20.4146	20.5986	20.9598	20.8702	20.3961	20.4042	20.6571	-0.0451976	-0.323804	0.475415	0.0828526
PMI_021733		XP_022107135.1 coiled-coil and C2 domain-containing protein 1-like isoform X1 [Acanthaster planci] (id=67.78%; len=90; e=1.94E-30)			2.73	0.4586	0.940864	1	1	1	0	15.6142	15.5538	15.6192	15.4264	15.7286	15.5026	15.4564	15.5141	15.3685	15.0452	15.0884	0.00740949	-0.323649	0.942808	0.0814949
PMI_022841		XP_022079258.1 pre-mRNA-splicing factor CWC22 homolog [Acanthaster planci] (id=69.93%; len=429; e=7.09E-167)			3.208	0.6287	0.05985	7	5	1	0	18.4032	18.6358	18.2873	18.3154	18.2951	18.7319	18.6936	18.7498	18.595	18.3403	18.2727	-0.220248	-0.322442	0.307954	0.0775681
m.23458; m.24618; m.24624	Pmi_642934_n; 35179; 35182	no_annot; XP_022105059.1 serine/arginine-rich splicing factor 4-like [Acanthaster planci] (id=87.63%; len=194; e=2.17E-120) ; XP_022105059.1 serine/arginine-rich splicing factor 4-like [Acanthaster planci] (id=86.08%; len=194; e=2.76E-119)	920	1	1.91	0.4576	0.038993	1	1	0	0	16.4605	16.7781	16.2952	16.0409	16.2667	16.8036	16.6453	16.214	15.7151	16.3808	16.6009	-0.418395	-0.322032	0.180839	0.378232
PMI_027534; m.7677	None; Pmi_525150_n	XP_022100877.1 uncharacterized protein LOC110984729 [Acanthaster planci] (id=65.37%; len=205; e=2.94E-95) ; no_annot	1203	1	2.53	0.4945	1.65131	1	1	0	0	15.2769	15.0434	15.1413	14.6211	14.6117	15.004	15.0744	15.115	14.7189	14.574	14.9388	-0.368785	-0.320588	0.178171	0.0834479
PMI_023842		QAA96015.1 mucin-related protein [Asterias rubens] (id=78.95%; len=304; e=2.13E-178)			2.606	0.5645	2.10688	1	1	1	0	16.2912	16.4634	15.9905	15.8451	16.1107	16.2538	16.1859	16.2731	15.8814	15.7817	16.09	-0.395197	-0.319915	0.0565364	0.0621593
m.37034	55809	XP_022093547.1 protein Churchill-like isoform X2 [Acanthaster planci] (id=83.33%; len=114; e=8.14E-68)			4.674	0.7946	1.18466	2	2	2	0	16.8446	16.9336	16.5727	16.7576	16.804	17.4804	17.6839	17.3319	16.9096	17.2339	17.4	-0.177678	-0.317569	0.124263	0.154162
PMI_022058; m.21087	None; Pmi_632862_I	XP_022109651.1 INO80 complex subunit B-like [Acanthaster planci] (id=75.10%; len=245; e=4.90E-109) ; IN80B_HUMAN_INO80_complex_subunit_B	639	1	2.308	0.4272	1.72744	1	1	0	0	16.8386	17.1117	16.5797	16.5714	16.6052	17.1027	17.3926	17.0436	16.9544	16.9375	16.6951	-0.38971	-0.317329	0.212924	0.0848097
m.27106	Pmi_656310_F	FLNC_HUMAN_Filamin-C			6.064	0.8139	0.008173	116	52	2	29	25.6748	25.6987	25.6492	25.6263	25.6546	25.798	25.9991	26.0193	25.6617	25.632	25.5717	-0.0434264	-0.317003	0.0967976	0.0335998
m.12639	Pmi_580950_C	CN16B_RAT_Uncharacterized_protein_C14orf166B_homolog			1.819	0.5855	1.64623	2	2	1	1	15.568	15.786	15.5985	15.6885	15.6063	15.966	16.1376	16.0223	15.6721	15.7179	15.7849	-0.0459092	-0.316994	0.74695	0.00944548
PMI_004428; m.10310	None; Pmi_558450_Y	XP_022090482.1 YEATS domain-containing protein 4-like [Acanthaster planci] (id=96.54%; len=231; e=6.72E-163) ; YETS4_HUMAN_YEATS_domain-containing_protein_4	2467	1	2.337	0.2623	2.02559	1	1	0	0	16.022	16.1527	15.8455	15.7512	15.8839	16.0384	16.162	16.3375	16.1361	15.4844	15.9675	-0.260502	-0.316601	0.0920226	0.242619
m.58852; m.2068	89242; Pmi_366560_n	XP_022096379.1 uncharacterized protein LOC110982351 [Acanthaster planci] (id=44.78%; len=326; e=1.01E-51) ; no_annot	1088	1	1.66	0.2458	0.443743	1	1	0	0	18.7946	19.0653	18.4624	18.0554	18.301	18.7487	18.872	18.2896	17.7158	18.4056	18.8433	-0.656964	-0.315172	0.0505435	0.458766
m.31768	Pmi_670170_n	no_annot			3.463	0.6731	0.36744	6	5	1	4	18.2789	18.6799	18.4072	18.4557	18.5581	18.6833	18.8486	18.6498	18.3831	18.3792	18.4752	-0.00572733	-0.314682	0.98193	0.0201017
m.24464	34931	XP_022085840.1 glycolipid transfer protein-like isoform X2 [Acanthaster planci] (id=75.00%; len=112; e=8.32E-59)			3.736	0.5284	1.54251	1	1	1	0	14.0809	14.4578	14.1328	13.6259	13.4627	14.4865	14.1727	14.1958	14.4367	13.5283	13.9461	-0.528927	-0.314644	0.158503	0.356536
PMI_016868; PMI_027448		XP_022105357.1 ADP-ribosylation factor-like protein 8B [Acanthaster planci] (id=98.93%; len=187; e=2.19E-135) ; XP_022105357.1 ADP-ribosylation factor-like protein 8B [Acanthaster planci] (id=83.42%; len=187; e=6.54E-106)	558	4	5.455	0.793	0.336871	6	4	0	0	21.0372	20.8953	21.2335	20.9255	21.0515	21.0218	20.9981	21.0415	20.836	20.6578	20.6261	0.103916	-0.313805	0.430471	0.0366248
m.27239; m.16985; m.27242; PMI_019644	39664; Pmi_611580_n; 39668; None	XP_022111849.1 uncharacterized protein LOC110991059 isoform X1 [Acanthaster planci] (id=64.55%; len=598; e=0.00E+00) ; no_annot; XP_022111851.1 uncharacterized protein LOC110991059 isoform X2 [Acanthaster planci] (id=70.39%; len=439; e=0.00E+00) ; XP_022111849.1 uncharacterized protein LOC110991059 isoform X1 [Acanthaster planci] (id=57.64%; len=347; e=9.14E-100)	689	1	3.444	0.6702	0.872489	1	1	0	0	12.2547	13.3433	12.9815	13.0622	12.65	12.6729	13.181	12.6747	12.8355	12.5832	12.1701	0.0989105	-0.31328	0.886228	0.291436
m.38441; m.24741	58083; Pmi_647911_C	XP_022079258.1 pre-mRNA-splicing factor CWC22 homolog [Acanthaster planci] (id=75.20%; len=1246; e=0.00E+00) ; CWC22_XENLA_Pre-mRNA-splicing_factor_CWC22_homolog	2345	5	3.208	0.6287	0.05985	7	5	0	4	18.3524	18.5138	18.1814	18.2395	18.1986	18.64	18.6114	18.6544	18.515	18.2681	18.1839	-0.226564	-0.312954	0.205029	0.0854355
m.44885; PMI_004664; m.26020	67244; None; Pmi_652621_O	XP_022087877.1 oligoribonuclease, mitochondrial-like isoform X1 [Acanthaster planci] (id=77.39%; len=230; e=8.36E-134) ; XP_022087877.1 oligoribonuclease, mitochondrial-like isoform X1 [Acanthaster planci] (id=77.39%; len=230; e=2.43E-134) ; ORN_HUMAN_Oligoribonuclease,_mitochondrial	901	5	4.184	0.653	0.169166	7	5	0	5	21.4143	21.533	21.3879	21.466	21.5022	21.8896	22.0388	21.9887	21.7178	21.5704	21.6915	-0.0216319	-0.312448	0.786597	0.00778636
PMI_019599		XP_022085280.1 crystallin J1B-like [Acanthaster planci] (id=57.22%; len=194; e=1.61E-62)			3.012	0.429	0.789476	1	1	1	0	16.2147	16.5691	16.7861	16.3679	16.7897	16.802	16.7297	16.4639	16.1683	16.3564	16.5338	0.255973	-0.312371	0.365069	0.101339
PMI_016790; PMI_017812		XP_022088499.1 40S ribosomal protein S7-like isoform X2 [Acanthaster planci] (id=93.96%; len=182; e=3.49E-118) ; XP_022088499.1 40S ribosomal protein S7-like isoform X2 [Acanthaster planci] (id=93.88%; len=196; e=1.99E-130)	2357	14	7.115	0.8094	0.203275	46	14	0	12	24.0232	24.1369	23.9534	24.0933	24.0596	24.3807	24.4092	24.4319	24.1285	24.0474	24.1161	-0.0446133	-0.309953	0.590514	0.00127647
m.48221; m.48219	72012; 72010	XP_022107162.1 speract receptor-like [Acanthaster planci] (id=91.62%; len=597; e=0.00E+00) ; XP_022107162.1 speract receptor-like [Acanthaster planci] (id=91.72%; len=568; e=0.00E+00)	1594	3	3.245	0.7458	0.304409	3	3	0	3	17.8926	17.808	17.695	17.6359	17.8497	18.744	17.8834	17.8644	17.8799	17.8201	17.863	-0.123443	-0.309639	0.205392	0.397545
PMI_008145		XP_022090789.1 transmembrane protein 232-like isoform X2 [Acanthaster planci] (id=81.94%; len=1008; e=0.00E+00)			1.248	0.2492	0.437877	1	1	1	0	17.9423	18.4616	17.4612	17.727	18.0412	18.9057	18.8741	18.1282	17.5397	18.435	19.0057	-0.458815	-0.309211	0.285644	0.574355
m.30116	Pmi_665760_A	A2ML1_HUMAN_Alpha-2-macroglobulin-like_protein_1			4.856	0.6999	0.941213	6	5	0	1	19.5363	19.7769	19.5797	19.4966	19.5812	19.778	19.944	20.1352	19.7388	19.6214	19.5695	-0.104084	-0.309183	0.542734	0.077053
m.22410	Pmi_638790_C	CENPJ_HUMAN_Centromere_protein_J			1.459	0.3996	1.28725	1	1	1	0	17.3366	17.3551	17.2095	16.9027	17.5796	17.7045	17.5906	17.3458	16.7438	17.503	17.4685	-0.115251	-0.308562	0.615677	0.342835
PMI_025441		XP_022080749.1 MMS19 nucleotide excision repair protein homolog [Acanthaster planci] (id=79.88%; len=502; e=0.00E+00)			3.242	0.6575	1.07032	4	2	0	1	18.7242	18.6516	18.6906	18.1336	18.4933	18.6913	18.6771	18.6879	18.2654	18.5213	18.3462	-0.248764	-0.307794	0.26434	0.0548386
PMI_022134		XP_022081862.1 mothers against decapentaplegic homolog 4-like isoform X3 [Acanthaster planci] (id=74.96%; len=587; e=0.00E+00)			5.148	0.8071	1.00752	4	4	0	2	19.1388	19.1297	19.1871	19.1029	18.922	18.98	19.1558	19.2415	18.9322	18.7863	18.7358	-0.063569	-0.307687	0.501748	0.0369872
PMI_002367; m.28475	None; Pmi_660660_C	XP_020626502.1 ras-related C3 botulinum toxin substrate 1-like [Orbicella faveolata] (id=55.66%; len=309; e=1.02E-113) ; CDC42_DROPS_Cdc42_homolog	1606	10	4.998	0.765	0.21109	22	10	0	1	23.1111	23.0933	23.0986	22.9736	23.0902	23.4865	23.4219	23.3908	23.0302	23.1644	23.182	-0.0480612	-0.307567	0.355591	0.00950811
PMI_026036		XP_011676082.1 PREDICTED: RNA-directed DNA polymerase from mobile element jockey-like, partial [Strongylocentrotus purpuratus] (id=46.84%; len=585; e=0.00E+00)			2.058	0.361	1.70787	1	1	1	0	18.6362	18.624	18.6936	18.0307	18.431	17.7078	18.1534	17.9318	17.6357	17.969	17.2658	-0.245013	-0.307487	0.331492	0.281533
m.43803	65850	WP_006668992.1 hypothetical protein [Arthrospira maxima] (id=32.00%; len=100; e=1.10E+00)			1.374	0.254	1.97817	1	1	1	0	16.6765	17.2608	16.3437	17.0755	16.6172	17.0149	16.9084	16.5759	16.358	16.7474	16.4714	-0.289857	-0.30746	0.505022	0.156176
m.15815; m.27134; PMI_007207	21173; Pmi_656391_B; None	XP_022082410.1 ribosome biogenesis protein bop1-A-like isoform X2 [Acanthaster planci] (id=79.83%; len=466; e=0.00E+00) ; BOP1_DANRE_Ribosome_biogenesis_protein_bop1; XP_022082409.1 ribosome biogenesis protein bop1-A-like isoform X1 [Acanthaster planci] (id=75.34%; len=742; e=0.00E+00)	979	1	3.365	0.6401	1.55361	1	1	0	0	14.0363	12.9881	13.6947	13.1108	13.3453	13.7464	14.6128	14.7267	14.1678	13.8342	14.1646	-0.128614	-0.306446	0.848556	0.432115
m.27926	Pmi_658961_T	TTC40_HUMAN_Tetratricopeptide_repeat_protein_40			4.735	0.7364	0.147218	4	4	1	2	19.0335	19.0171	18.9304	18.9381	19.0521	19.3717	19.4021	19.4252	18.8803	19.232	19.1703	-0.0517423	-0.305477	0.318082	0.103413
m.14626; PMI_000950; PMI_011691	Pmi_596200_U; None; None	UBE3B_MOUSE_Ubiquitin-protein_ligase_E3B; XP_022103880.1 ubiquitin-protein ligase E3B-like [Acanthaster planci] (id=84.41%; len=1148; e=0.00E+00) ; XP_022103880.1 ubiquitin-protein ligase E3B-like [Acanthaster planci] (id=84.34%; len=996; e=0.00E+00)	2221	1	3.274	0.5562	1.05784	1	1	0	0	14.3435	14.1748	14.044	14.361	14.2094	14.344	14.4468	14.3646	13.9385	14.4092	13.8927	-0.0543645	-0.304992	0.693794	0.202602
m.14457	Pmi_594752_n	no_annot			2.638	0.5087	0.861037	1	1	1	0	15.4232	15.839	15.4211	15.5448	15.4919	15.8869	15.9664	15.8128	15.2472	15.8987	15.6099	-0.145198	-0.303431	0.610904	0.24538
PMI_021112; m.31071	None; 46415	XP_022094656.1 deoxyhypusine synthase-like [Acanthaster planci] (id=80.76%; len=369; e=0.00E+00) ; XP_022094656.1 deoxyhypusine synthase-like [Acanthaster planci] (id=89.50%; len=381; e=0.00E+00)	2743	3	6.818	0.7401	0.066007	4	3	0	0	19.731	19.484	19.966	19.4482	19.4547	19.3989	19.3331	19.3363	19.2122	19.049	18.8976	0.0154765	-0.303141	0.946239	0.0722224
m.2182; m.7339	4020; Pmi_519941_L	XP_022094830.1 E3 ubiquitin-protein ligase listerin-like [Acanthaster planci] (id=81.17%; len=154; e=2.34E-78) ; LTN1_MOUSE_E3_ubiquitin-protein_ligase_listerin	2372	1	3.183	0.5325	1.54445	1	1	0	0	15.5745	15.3945	15.4114	15.2596	15.353	15.845	15.8336	15.4087	15.06	15.5938	15.5247	-0.143218	-0.302919	0.326351	0.243386
PMI_002924; PMI_000664; m.27085	None; None; Pmi_656231_N	XP_022088176.1 nuclear transcription factor Y subunit gamma-like isoform X2 [Acanthaster planci] (id=90.70%; len=301; e=0.00E+00) ; XP_022088176.1 nuclear transcription factor Y subunit gamma-like isoform X2 [Acanthaster planci] (id=83.23%; len=328; e=3.66E-179) ; NFYC_MOUSE_Nuclear_transcription_factor_Y_subunit_gamma	965	1	1.974	0.5542	2.1251	1	1	0	0	17.6123	17.4743	17.6254	17.6661	17.7407	18.0167	17.769	17.8763	17.6031	17.5745	17.5771	0.134085	-0.302439	0.263255	0.049838
m.25401	Pmi_650570_M	MIB1_HUMAN_E3_ubiquitin-protein_ligase_MIB1			3.508	0.6933	1.13143	4	2	1	1	17.4363	18.1754	17.4565	17.0447	17.4845	17.5994	17.6395	17.5616	16.9933	17.5074	17.396	-0.47731	-0.30129	0.402655	0.191255
m.24363; m.37575; PMI_011308	Pmi_646446_M; 56859; None	MPP2_MOUSE_MAGUK_p55_subfamily_member_2; XP_791632.3 PREDICTED: MAGUK p55 subfamily member 6 [Strongylocentrotus purpuratus] (id=61.35%; len=564; e=0.00E+00) ; XP_022101245.1 MAGUK p55 subfamily member 2-like isoform X3 [Acanthaster planci] (id=93.24%; len=222; e=1.97E-145)	1960	1	4.792	0.7335	1.46149	1	1	0	0	14.5859	14.4587	14.3647	14.5286	14.3749	14.6374	14.5949	14.8804	14.3753	14.411	14.423	-0.0995935	-0.301158	0.337605	0.0737128
m.25586	36880	XP_022110027.1 high mobility group protein HMGI-C-like [Acanthaster planci] (id=57.76%; len=116; e=2.76E-08)			5.549	0.7654	0.997503	20	8	1	7	24.3376	24.2541	24.3041	23.8422	23.9688	24.0193	24.2003	24.2244	24.144	23.7746	23.6223	-0.257464	-0.301024	0.196836	0.181812
m.48838	73025	XP_022092267.1 superkiller viralicidic activity 2-like 2 [Acanthaster planci] (id=95.69%; len=927; e=0.00E+00)			3.155	0.5458	0.212599	3	3	1	2	16.4969	16.5845	16.2871	16.1439	16.7179	16.9582	17.2547	16.8482	16.519	16.7128	16.9271	-0.157736	-0.300711	0.459958	0.150236
m.52587	78378	XP_022104780.1 hydroxyacyl-coenzyme A dehydrogenase, mitochondrial-like [Acanthaster planci] (id=91.32%; len=311; e=0.00E+00)			6.483	0.8245	0.283022	56	16	0	15	25.5457	25.4838	25.686	25.3198	25.5269	25.536	25.5781	25.619	25.2947	25.3359	25.2029	-0.00385157	-0.299834	0.974952	0.00543181
PMI_003771		XP_013025373.1 hypothetical protein SPOG_03504 [Schizosaccharomyces cryophilus OY26] (id=76.14%; len=570; e=0.00E+00)			7.06	0.8013	0.035835	238	37	0	37	28.0415	28.1571	27.9783	28.0766	28.0512	28.3517	28.4823	28.4495	28.2217	28.0681	28.0946	-0.0639423	-0.299722	0.454072	0.00895529
PMI_011183; m.18217; PMI_003561	None; Pmi_618620_T; None	XP_022079787.1 prostaglandin E synthase 3-like [Acanthaster planci] (id=82.53%; len=166; e=2.85E-86) ; TEBP_HUMAN_Prostaglandin_E_synthase_3; XP_022079787.1 prostaglandin E synthase 3-like [Acanthaster planci] (id=76.36%; len=165; e=2.67E-76)	806	12	6.546	0.8482	0.450328	27	12	0	0	24.1277	24.1111	24.1295	23.7896	23.8347	24.057	24.1078	24.1373	24.0134	23.6868	23.7045	-0.201486	-0.299131	0.198586	0.0997164
m.32018	Pmi_670810_n	no_annot			4.142	0.7569	0.727129	5	3	0	2	18.9157	19.0939	18.6687	19.0086	18.8844	19.242	19.2573	19.3669	18.9866	18.9741	19.0091	-0.150898	-0.298761	0.344445	0.012565
PMI_008657; m.9224	None; Pmi_545711_G	CDS27339.1 GLIPR1 protein 1 [Hymenolepis microstoma] (id=32.77%; len=119; e=2.36E-11) ; GLIP1_MOUSE_Glioma_pathogenesis-related_protein_1	1045	1	1.952	0.3637	1.88101	1	1	0	0	14.7309	16.565	15.8579	16.1548	15.2732	16.1064	16.2362	15.992	15.1578	15.855	16.4256	0.114	-0.298726	0.922057	0.50251
m.21391; m.18452	Pmi_634120_T; 24310	TSN3_BOVIN_Tetraspanin-3; XP_022082939.1 CD151 antigen-like [Acanthaster planci] (id=74.52%; len=259; e=3.04E-129)	295	3	2.793	0.599	1.57611	3	3	0	1	18.0345	18.0676	17.8735	18.0049	17.918	18.1479	18.4048	18.4819	17.9989	18.2055	17.935	-0.118947	-0.298358	0.0770829	0.0860302
m.19718	Pmi_626290_G	GOGA1_HUMAN_Golgin_subfamily_A_member_1			3.884	0.7219	0.813473	7	7	0	7	19.0998	19.0461	18.8423	19.0064	19.1568	19.3741	19.6546	19.512	19.2847	19.1745	19.1872	-0.0711188	-0.298096	0.521162	0.0499243
PMI_009706		XP_022106343.1 peroxisomal multifunctional enzyme type 2-like isoform X4 [Acanthaster planci] (id=50.93%; len=324; e=1.77E-90)			4.333	0.6488	0.750253	7	6	0	0	20.4	21.084	20.3505	20.3371	20.3101	20.8314	20.8717	20.8013	20.5839	20.5733	20.4541	-0.409455	-0.297724	0.442799	0.00838413
PMI_016279; PMI_007737; m.9208	None; None; Pmi_545425_R	XP_022103685.1 ral GTPase-activating protein subunit beta-like [Acanthaster planci] (id=79.33%; len=658; e=0.00E+00) ; XP_022103685.1 ral GTPase-activating protein subunit beta-like [Acanthaster planci] (id=70.60%; len=1575; e=0.00E+00) ; RLGPB_MOUSE_Ral_GTPase-activating_protein_subunit_beta	688	1	2.592	0.5347	1.81234	1	1	0	0	13.9474	14.2681	13.9509	13.8362	13.8064	14.3354	14.027	13.8083	13.2967	14.1279	13.8531	-0.243243	-0.297663	0.357929	0.370534
m.12441; PMI_006220	Pmi_579060_N; None	NOC4B_XENLA_Nucleolar_complex_protein_4_homolog_B; XP_022104594.1 nucleolar complex protein 4 homolog [Acanthaster planci] (id=80.80%; len=500; e=0.00E+00)	2181	1	1.936	0.2867	0.278071	1	1	0	0	16.2776	16.6172	16.3207	15.918	16.0124	16.2957	16.604	16.1127	15.5605	16.2896	16.2707	-0.363717	-0.297198	0.222332	0.359841
PMI_000299; PMI_009919; m.27395	None; None; Pmi_657261_C	XP_022091733.1 catenin alpha-2-like [Acanthaster planci] (id=94.88%; len=703; e=0.00E+00) ; XP_022091733.1 catenin alpha-2-like [Acanthaster planci] (id=94.70%; len=679; e=0.00E+00) ; CTNA2_PONAB_Catenin_alpha-2	163	1	1.677	0.3876	1.02357	1	1	0	0	16.7558	16.7941	16.6162	16.8964	17.0172	16.8962	17.2571	17.3582	17.0761	16.8685	16.6766	0.0683226	-0.296791	0.624845	0.180122
PMI_005418; m.19857	None; Pmi_626910_N	XP_022102084.1 NADPH--cytochrome P450 reductase-like isoform X3 [Acanthaster planci] (id=91.89%; len=555; e=0.00E+00) ; NCPR_BOVIN_NADPH--cytochrome_P450_reductase	188	3	3.717	0.5811	1.51737	3	3	0	2	17.8442	18.0169	17.6617	17.6861	17.6511	17.9407	18.1514	18.0773	17.5971	17.7927	17.892	-0.264229	-0.295849	0.196799	0.0557873
m.34255	51409	XP_022093392.1 E3 ubiquitin-protein ligase TRIP12-like [Acanthaster planci] (id=74.94%; len=399; e=3.56E-141)			2.482	0.4428	1.70673	1	1	1	0	14.954	15.1409	15.0258	14.7547	15.0657	14.9825	15.0056	14.8377	14.5728	14.799	14.5666	-0.0987103	-0.295829	0.522762	0.039417
m.13667	Pmi_589210_P	PP1B_PIG_Serine/threonine-protein_phosphatase_PP1-beta_c..CUT			5.058	0.7732	0.245488	13	8	0	8	21.7512	21.5062	21.7367	21.5646	21.657	21.7432	21.6931	21.8668	21.6653	21.4993	21.2522	0.0240768	-0.295444	0.879141	0.118068
PMI_016312		XP_022093121.1 basic proline-rich protein-like isoform X1 [Acanthaster planci] (id=79.71%; len=488; e=0.00E+00)			4.3	0.7243	1.31945	6	6	0	2	19.5436	19.5466	19.2063	19.354	19.4371	19.8111	19.8751	19.9366	19.5734	19.5326	19.6306	-0.212619	-0.295387	0.0876342	0.00366642
PMI_017278; m.20828	None; Pmi_631740_T	XP_022109203.1 transformer-2 protein homolog alpha-like isoform X1 [Acanthaster planci] (id=88.89%; len=63; e=7.27E-30) ; TRA2A_MOUSE_Transformer-2_protein_homolog_alpha	768	1	3.853	0.7218	0.733782	1	1	0	0	16.5328	16.1339	16.1044	15.9829	16.1026	16.0959	16.4177	16.1147	16.2551	15.6939	15.7944	-0.270075	-0.294935	0.39839	0.232348
m.25379; m.15159; PMI_001593	36572; Pmi_600050_T; None	XP_022088138.1 LOW QUALITY PROTEIN: general transcription factor IIF subunit 2-like [Acanthaster planci] (id=82.88%; len=257; e=7.95E-159) ; T2FB_XENLA_General_transcription_factor_IIF_subunit_2; XP_022088138.1 LOW QUALITY PROTEIN: general transcription factor IIF subunit 2-like [Acanthaster planci] (id=82.88%; len=257; e=2.48E-158)	1843	3	2.781	0.5365	0.798051	3	3	0	2	18.4575	18.5694	18.2585	18.1279	18.2994	18.5944	18.7331	18.7982	18.3685	18.4327	18.4421	-0.284864	-0.294151	0.044719	0.0270627
PMI_022429		XP_022094830.1 E3 ubiquitin-protein ligase listerin-like [Acanthaster planci] (id=92.13%; len=216; e=2.11E-121)			3.713	0.5042	1.40109	2	2	1	1	17.7515	17.7446	17.5171	17.6782	17.3897	17.611	17.9022	17.923	17.8777	17.3947	17.2818	-0.21972	-0.293991	0.118835	0.250517
m.20845	Pmi_631780_S	SNR40_MOUSE_U5_small_nuclear_ribonucleoprotein_40_kDa_protein			5.312	0.747	0.967589	5	4	2	2	19.0155	19.0461	18.9254	18.864	18.9058	19.2592	19.3187	19.0958	18.8351	18.9674	18.9926	-0.132385	-0.292836	0.0123115	0.0275717
PMI_007054		XP_022106572.1 ectopic P granules protein 5 homolog isoform X3 [Acanthaster planci] (id=76.27%; len=1142; e=0.00E+00)			2.914	0.4815	1.25745	1	1	1	0	15.42	15.7402	15.4952	15.5725	15.752	15.8895	16.1115	15.9858	15.752	15.6697	15.6884	0.0264564	-0.2922	0.899262	0.0320988
m.54862; m.15225; PMI_012640	81648; Pmi_600460_P; None	XP_022097573.1 PIH1 domain-containing protein 2-like [Acanthaster planci] (id=73.05%; len=282; e=1.23E-146) ; PIHD2_XENTR_PIH1_domain-containing_protein_2; XP_022097573.1 PIH1 domain-containing protein 2-like [Acanthaster planci] (id=63.45%; len=383; e=1.42E-164)	1618	2	2.382	0.5451	1.4377	2	2	0	1	16.907	17.426	17.0244	16.7525	16.8713	16.9359	17.1927	17.0803	16.7419	17.0011	16.5912	-0.28376	-0.291551	0.462809	0.121014
m.43471	65382	XP_022083355.1 heterogeneous nuclear ribonucleoprotein A3-like [Acanthaster planci] (id=58.29%; len=187; e=1.69E-60)			6.747	0.8165	0.285849	78	14	0	14	25.8068	25.6127	25.745	25.6073	25.747	25.9986	26.0941	26.0583	25.732	25.7366	25.8107	-0.00997194	-0.290553	0.937146	0.00158723
PMI_015392; m.26440; PMI_006202	None; Pmi_654160_C; None	XP_022090433.1 coiled-coil domain-containing protein 63-like [Acanthaster planci] (id=92.48%; len=412; e=0.00E+00) ; CCD63_HUMAN_Coiled-coil_domain-containing_protein_63; XP_022090433.1 coiled-coil domain-containing protein 63-like [Acanthaster planci] (id=87.61%; len=436; e=0.00E+00)	1496	3	4.526	0.7673	0.932266	3	3	0	0	18.3925	18.7591	18.1609	18.253	18.2403	18.7438	18.636	18.7518	18.3905	18.3974	18.4753	-0.357786	-0.289426	0.295362	0.00444757
m.30405; PMI_004527	Pmi_666600_S; None	SMC3_XENLA_Structural_maintenance_of_chromosomes_protein_3; XP_022094442.1 structural maintenance of chromosomes protein 3-like isoform X2 [Acanthaster planci] (id=97.66%; len=1025; e=0.00E+00)	877	6	4.038	0.7105	1.03026	7	6	0	2	19.1869	19.3624	19.1184	19.1317	19.2615	19.5102	19.4948	19.5265	19.152	19.252	19.2626	-0.104127	-0.288327	0.428487	0.0106857
PMI_026501; m.29833	None; Pmi_664942_T	XP_022110761.1 transmembrane protein 192-like [Acanthaster planci] (id=69.05%; len=84; e=3.43E-27) ; TM292_MOUSE_Transmembrane_protein_192	1399	1	3.786	0.6719	1.30275	1	1	0	0	18.0961	17.7281	17.9821	18.1661	18.0807	18.3185	18.2021	18.4352	17.9366	18.2613	17.8939	0.164197	-0.287969	0.531338	0.115154
PMI_000675; m.18790	None; 24816	XP_022090140.1 DNA-directed RNA polymerase II subunit RPB4-like [Acanthaster planci] (id=95.83%; len=144; e=1.22E-83) ; XP_022090140.1 DNA-directed RNA polymerase II subunit RPB4-like [Acanthaster planci] (id=95.83%; len=144; e=3.69E-83)	1841	4	5.01	0.7679	0.525233	4	4	0	0	17.3628	17.6868	17.4512	17.4581	17.5271	17.7639	17.7858	17.7106	17.2224	17.5462	17.6301	-0.0459952	-0.287198	0.824153	0.143095
PMI_028208		XP_022109674.1 rab GTPase-binding effector protein 1-like [Acanthaster planci] (id=83.99%; len=281; e=7.23E-143)			4.351	0.6603	0.214153	8	8	0	6	19.4751	19.633	19.3054	19.1957	19.312	19.7424	19.6531	19.7641	19.3379	19.5419	19.4271	-0.283	-0.28422	0.123519	0.0221698
PMI_006055		XP_022095900.1 contactin-2-like isoform X2 [Acanthaster planci] (id=59.33%; len=777; e=0.00E+00)			4.035	0.7596	1.19295	10	6	0	6	21.5865	21.578	21.5379	21.4331	21.5004	21.6778	21.7848	21.7985	21.3382	21.4839	21.5869	-0.0918129	-0.284065	0.0930081	0.0392298
m.15124; m.52831	Pmi_599770_C; 78745	CSN1_XENLA_COP9_signalosome_complex_subunit_1; XP_022089318.1 COP9 signalosome complex subunit 1-like isoform X3 [Acanthaster planci] (id=96.89%; len=483; e=0.00E+00)	2033	6	4.302	0.619	1.03665	10	6	0	5	21.4307	21.6048	21.3846	21.429	21.5138	21.7917	21.8606	21.876	21.4226	21.5908	21.6628	-0.0752622	-0.284046	0.540597	0.0443842
m.16931	Pmi_611200_3	3HAO_XENTR_3-hydroxyanthranilate_3,4-dioxygenase			3.815	0.6824	0.952409	13	8	3	5	21.2173	21.4046	21.1472	21.1517	21.155	21.4248	21.6468	21.5929	21.3573	21.2193	21.236	-0.159649	-0.283986	0.337576	0.0303165
m.24428; m.27169	Pmi_646530_H; 39544	HMG2_DROME_High_mobility_group_protein_DSP1; XP_022099630.1 high mobility group protein 1 homolog isoform X2 [Acanthaster planci] (id=79.50%; len=161; e=6.07E-82)	2474	4	4.487	0.6895	0.897764	6	4	0	4	21.1702	20.9706	20.9231	21.0977	21.0847	21.2474	21.3127	21.6223	21.3291	21.0949	20.9069	-0.0351682	-0.283881	0.793062	0.166893
PMI_000957; m.17518; m.23858	None; 22976; Pmi_644440_N	XP_022084994.1 kinetochore protein Nuf2-like [Acanthaster planci] (id=69.38%; len=307; e=1.64E-135) ; XP_022084994.1 kinetochore protein Nuf2-like [Acanthaster planci] (id=70.00%; len=320; e=1.24E-144) ; NUF2_DANRE_Kinetochore_protein_Nuf2	2473	1	1.84	0.6033	0.90335	2	1	0	0	17.479	17.6563	17.3912	17.2526	17.236	17.6262	17.6357	17.6279	17.3622	17.4229	17.2539	-0.274391	-0.283624	0.140539	0.0286831
PMI_005743		XP_022090064.1 uncharacterized protein LOC110978974 [Acanthaster planci] (id=72.81%; len=353; e=1.36E-169)			4.575	0.7384	1.04102	2	2	0	1	16.8554	16.9831	16.6491	16.1626	16.3385	16.7001	17.0116	16.3715	15.9028	16.5212	16.81	-0.535849	-0.283042	0.0493264	0.438906
m.29077; m.47539	Pmi_662500_n; 71167	no_annot; XP_022087770.1 EF-hand calcium-binding domain-containing protein 14-like isoform X3 [Acanthaster planci] (id=61.06%; len=547; e=0.00E+00)	61	1	3.322	0.6288	2.42781	1	1	0	0	16.8788	16.9676	16.698	16.7768	16.8541	17.231	16.8765	16.8459	16.7246	16.7989	16.5814	-0.146849	-0.282845	0.112922	0.135002
PMI_013367; m.23461; m.31889; PMI_006184	None; Pmi_642936_O; 47646; None	XP_022082341.1 origin recognition complex subunit 6-like isoform X3 [Acanthaster planci] (id=70.28%; len=212; e=3.95E-100) ; ORC6_HUMAN_Origin_recognition_complex_subunit_6; XP_022082339.1 origin recognition complex subunit 6-like isoform X1 [Acanthaster planci] (id=82.03%; len=256; e=1.75E-155) ; XP_022082340.1 origin recognition complex subunit 6-like isoform X2 [Acanthaster planci] (id=66.67%;…	763	1	2.288	0.4948	1.47446	1	1	0	0	17.4212	17.276	17.4727	17.4369	17.6535	17.7949	17.9171	17.885	17.4147	17.5314	17.8026	0.172451	-0.282769	0.196653	0.122425
m.35788; m.31972	53873; Pmi_670521_R	XP_022084676.1 60S ribosomal protein L4-like [Acanthaster planci] (id=93.08%; len=390; e=0.00E+00) ; RL4_URECA_60S_ribosomal_protein_L4	2156	22	7.672	0.7891	0.229674	69	22	0	20	25.4236	25.2879	25.418	25.3676	25.3721	25.5156	25.6007	25.5181	25.343	25.2338	25.2099	0.0301642	-0.282596	0.734182	0.00678907
m.29496; m.40945	Pmi_663862_n; 61922	no_annot; XP_022080650.1 uncharacterized protein LOC110973825 isoform X1 [Acanthaster planci] (id=76.61%; len=248; e=2.41E-138)	836	2	3.587	0.5907	0.070058	2	2	0	1	18.1082	18.3586	18.3754	19.2867	18.7379	19.5017	19.3401	19.4066	19.3378	19.1103	18.9539	0.566644	-0.282163	0.157925	0.11198
PMI_020034		XP_022107017.1 TP53-binding protein 1-like [Acanthaster planci] (id=63.12%; len=1662; e=0.00E+00)			3.228	0.5883	0.909208	2	2	0	2	16.7773	16.7572	16.6036	16.4273	16.5675	16.6574	16.856	16.6234	16.6589	16.3317	16.3027	-0.234444	-0.281152	0.0446884	0.118796
PMI_012174		XP_022098497.1 neurogenic locus notch homolog protein 1-like [Acanthaster planci] (id=42.17%; len=166; e=4.74E-26)			3.89	0.6779	0.34651	3	2	2	0	18.7524	18.8932	18.8842	18.4418	18.4061	18.5157	18.7361	18.6822	18.5273	18.4372	18.1277	-0.245427	-0.280573	0.252477	0.131889
PMI_028642		XP_020371528.1 uncharacterized protein LOC109916227 isoform X1 [Rhincodon typus] (id=38.79%; len=397; e=2.19E-74)			3.123	0.4102	1.13134	1	1	1	0	17.7143	18.1766	17.8914	17.1688	17.3946	17.7593	17.7747	17.0935	16.4704	17.4558	17.862	-0.460502	-0.279742	0.255822	0.592689
PMI_027889; m.26670; PMI_008787	None; Pmi_654834_I; None	XP_022090558.1 iron-sulfur cluster assembly 2 homolog, mitochondrial-like [Acanthaster planci] (id=76.58%; len=158; e=1.43E-80) ; ISCA2_HUMAN_Iron-sulfur_cluster_assembly_2_homolog,_mitochondrial; XP_022090558.1 iron-sulfur cluster assembly 2 homolog, mitochondrial-like [Acanthaster planci] (id=77.22%; len=158; e=9.98E-82)	1866	2	3.313	0.5249	0.947742	2	2	0	0	18.326	18.1716	18.0445	18.125	18.3346	18.4205	18.5116	18.5193	18.1943	18.224	18.1958	-0.0807815	-0.279132	0.538547	0.00812489
m.21622	Pmi_635261_A	AP3S1_HUMAN_AP-3_complex_subunit_sigma-1			5.049	0.6941	0.779258	10	5	1	4	21.4324	21.4442	21.3108	21.2608	21.3077	21.553	21.6302	21.5397	21.084	21.3933	21.4087	-0.145222	-0.278982	0.00694348	0.110229
m.20729; PMI_025614; PMI_014783	Pmi_631280_U; None; None	UAP1_MOUSE_UDP-N-acetylhexosamine_pyrophosphorylase; XP_022099505.1 UDP-N-acetylhexosamine pyrophosphorylase-like isoform X1 [Acanthaster planci] (id=89.70%; len=466; e=0.00E+00) ; XP_022099507.1 UDP-N-acetylhexosamine pyrophosphorylase-like isoform X2 [Acanthaster planci] (id=91.50%; len=506; e=0.00E+00)	2090	1	1.868	0.5412	1.59424	1	1	0	0	11.8774	12.3025	11.3249	11.1527		12.534	11.4674	12.0024		11.7227		-0.851181	-0.278558	0.118671
m.22092	Pmi_637220_D	DHR11_HUMAN_Dehydrogenase/reductase_SDR_family_member_11			5.802	0.6966	1.05764	11	4	1	3	20.9351	20.6291	21.0268	20.9481	20.8782	21.253	21.0213	20.9918	20.6385	20.8071	20.9857	0.16893	-0.278255	0.460443	0.10131
m.10771; PMI_026260	Pmi_564103_Z; None	ZDH24_RAT_Probable_palmitoyltransferase_ZDHHC24; XP_022085241.1 probable palmitoyltransferase ZDHHC24 [Acanthaster planci] (id=82.58%; len=287; e=0.00E+00)	865	1	2.309	0.3486	1.73457	1	1	0	0	16.8669	17.0315	17.0842	16.7343	17.0958	17.2259	17.0852	17.1852	16.5354	17.0573	17.0706	0.0221921	-0.277621	0.887598	0.252709
m.55388	82429	XP_022095901.1 contactin-2-like isoform X3 [Acanthaster planci] (id=74.18%; len=980; e=0.00E+00)			4.366	0.7567	1.19295	8	5	0	5	21.4164	21.3843	21.3599	21.2673	21.327	21.5045	21.5937	21.6143	21.1334	21.3164	21.4299	-0.0822561	-0.277613	0.0815125	0.0695371
PMI_011411; m.5399; PMI_028515	None; Pmi_483980_A; None	XP_022095628.1 ATP synthase subunit s, mitochondrial-like isoform X1 [Acanthaster planci] (id=81.22%; len=213; e=3.26E-121) ; ATP5S_BOVIN_ATP_synthase_subunit_s,_mitochondrial; XP_022095629.1 ATP synthase subunit s, mitochondrial-like isoform X2 [Acanthaster planci] (id=88.71%; len=186; e=8.54E-121)	235	1	2.857	0.5516	1.39883	1	1	0	0	18.1109	18.0871	18.1833	17.8787	17.9553	17.9964	18.2398	18.1223	18.0377	17.6561	17.8369	-0.0932413	-0.275942	0.415495	0.114633
m.10559	15760	XP_022081844.1 mothers against decapentaplegic homolog 4-like isoform X1 [Acanthaster planci] (id=99.47%; len=187; e=2.22E-133)			4.687	0.7711	1.28386	5	4	0	3	19.4654	19.4894	19.5355	19.3551	19.295	19.4417	19.5824	19.6707	19.4167	19.2312	19.2201	-0.0821897	-0.275567	0.373411	0.0405538
m.4087	7044	XP_022103689.1 neurexin-1-like isoform X1 [Acanthaster planci] (id=93.86%; len=179; e=4.02E-113)			2.732	0.5794	1.07134	1	1	1	0	14.9011	14.9275	15.1062	14.8217	14.9088	14.9118	15.1587	15.0799	14.528	14.7875	15.0085	0.0312932	-0.275477	0.747101	0.176446
PMI_026651		XP_022094750.1 sulfotransferase 1A1-like [Acanthaster planci] (id=73.67%; len=319; e=2.03E-163)			3.375	0.5784	1.27101	2	2	1	1	16.1294	16.0108	16.0327	16.1738	16.2014	16.1991	16.3773	16.029	16.0657	15.9412	15.7747	0.0659114	-0.274614	0.478529	0.106555
m.24861; m.24866; m.24865	Pmi_648501_F; 35631; 35630	FNTB_BOVIN_Protein_farnesyltransferase_subunit_beta; XP_022105321.1 protein farnesyltransferase subunit beta-like [Acanthaster planci] (id=90.98%; len=410; e=0.00E+00) ; XP_022105321.1 protein farnesyltransferase subunit beta-like [Acanthaster planci] (id=91.37%; len=394; e=0.00E+00)	1954	4	3.824	0.6744	0.31778	7	4	0	3	21.6056	21.8687	21.852	21.253	21.6326	21.7459	21.8417	21.747	21.4383	21.5694	21.5038	-0.157951	-0.274375	0.522867	0.00561382
PMI_010988		XP_022103700.1 LOW QUALITY PROTEIN: baculoviral IAP repeat-containing protein 6-like [Acanthaster planci] (id=86.46%; len=1352; e=0.00E+00)			2.204	0.6338	1.7153	3	2	1	1	20.9117	21.3546	20.8943	20.4362	20.5826	21.2681	21.5809	20.9958	20.3687	20.915	21.7389	-0.49547	-0.274068	0.213317	0.575994
PMI_014331		XP_022093655.1 V-type proton ATPase subunit D-like [Acanthaster planci] (id=68.97%; len=232; e=8.15E-77)			6.046	0.8072	0.501667	14	9	2	0	20.758	20.9761	20.7625	20.7092	20.7839	21.053	21.151	21.0272	20.8211	20.741	20.8473	-0.115175	-0.273954	0.478356	0.00560446
m.17223	Pmi_613003_L	LTR3A_XENLA_Ragulator_complex_protein_LAMTOR3-A			6.217	0.728	1.27042	4	1	1	0	18.3599	18.2076	18.4287	18.1902	18.3099	18.6694	18.5224	18.594	18.3649	18.2981	18.3009	0.0257997	-0.273943	0.820954	0.0106309
PMI_002825		XP_022103700.1 LOW QUALITY PROTEIN: baculoviral IAP repeat-containing protein 6-like [Acanthaster planci] (id=84.64%; len=2305; e=0.00E+00)			4.674	0.7296	0.96447	3	2	0	1	20.9239	21.4225	20.9034	20.454	20.5898	21.2723	21.5863	21.0026	20.3794	20.919	21.7415	-0.524149	-0.273759	0.236644	0.57451
PMI_023011; PMI_015633		XP_022083046.1 TATA-box-binding protein 2-like [Acanthaster planci] (id=80.48%; len=292; e=6.50E-150) ; XP_022083046.1 TATA-box-binding protein 2-like [Acanthaster planci] (id=87.20%; len=297; e=1.26E-175)	2072	1	3.608	0.5188	1.11362	1	1	0	0	17.1878	17.2369	16.9041	17.0414	16.9782	17.1474	17.2302	17.1748	16.6627	16.9501	17.1194	-0.237823	-0.27341	0.0151134	0.173085
PMI_028235		XP_022091330.1 uncharacterized protein LOC110979639 [Acanthaster planci] (id=69.88%; len=332; e=1.56E-147)			3.731	0.5235	0.470818	2	2	1	1	18.4279	18.6559	18.3358	18.27	18.6127	18.8928	18.8116	18.8429	18.5095	18.629	18.59	-0.135737	-0.272889	0.456855	0.00467681
PMI_022256		XP_022107938.1 GDP-fucose protein O-fucosyltransferase 1-like isoform X1 [Acanthaster planci] (id=74.88%; len=430; e=0.00E+00)			3.867	0.7065	1.25331	2	2	0	2	18.1664	18.1325	18.2158	18.0535	17.9262	18.3224	18.1824	18.3895	18.1332	17.9488	17.9938	-0.0842701	-0.272826	0.421593	0.030122
PMI_005915		XP_022096230.1 LOW QUALITY PROTEIN: squamous cell carcinoma antigen recognized by T-cells 3-like [Acanthaster planci] (id=70.29%; len=1040; e=0.00E+00)			5.941	0.7652	1.09868	4	4	0	4	19.7116	19.8664	19.6712	19.7196	19.8234	20.0205	20.2904	20.2498	19.9318	19.8953	19.9153	-0.0509391	-0.272737	0.635511	0.0809431
PMI_004064		sp|D7UQM5.1|AURK_PATPE RecName: Full=Aurora kinase; AltName: Full=ApAurora (id=99.51%; len=407; e=0.00E+00)			4.706	0.7359	0.961632	10	7	0	7	19.309	19.4204	19.234	19.2528	19.3031	19.5344	19.6548	19.605	19.378	19.3428	19.2572	-0.101387	-0.2721	0.294277	0.00557565
PMI_005559		XP_022109998.1 uncharacterized protein LOC110989726 [Acanthaster planci] (id=81.06%; len=433; e=0.00E+00)			5.343	0.6966	0.237482	40	6	2	0	25.0332	24.9671	25.0578	24.5901	24.8728	25.1031	25.0219	25.2209	25.0153	24.8411	24.6741	-0.159904	-0.271811	0.361073	0.0913963
PMI_004578		XP_022094544.1 probable aminopeptidase NPEPL1 [Acanthaster planci] (id=89.89%; len=524; e=0.00E+00)			5.23	0.7779	0.241483	27	17	0	17	21.9656	22.2582	21.8932	22.4591	22.2604	22.8695	22.7244	22.8655	22.4421	22.4675	22.7345	0.0923416	-0.271763	0.705569	0.0818801
m.19960; PMI_008717	Pmi_627480_C; None	CISD3_HUMAN_CDGSH_iron-sulfur_domain-containing_protein_3..CUT; XP_022109315.1 CDGSH iron-sulfur domain-containing protein 3, mitochondrial-like [Acanthaster planci] (id=76.80%; len=125; e=6.33E-65)	1635	1	1.91	0.445	0.799673	2	1	0	0	20.4155	19.5308	20.6222	20.1032	20.2281	20.3658	20.4717	20.2679	20.0021	20.1899	20.0993	0.344717	-0.271345	0.575101	0.0278074
m.21214; PMI_021737	Pmi_633490_I; None	IF6_XENLA_Eukaryotic_translation_initiation_factor_6; XP_022107703.1 eukaryotic translation initiation factor 6 [Acanthaster planci] (id=94.22%; len=242; e=1.41E-167)	653	6	6.208	0.8233	0.123675	14	6	0	0	21.7306	21.9927	21.6885	21.5181	21.6919	21.9383	22.0418	22.027	21.5568	21.8039	21.8325	-0.228826	-0.271322	0.300307	0.0760387
PMI_007352		XP_022096135.1 uncharacterized protein LOC110982186 [Acanthaster planci] (id=62.74%; len=687; e=0.00E+00)			3.97	0.7644	0.03634	5	4	0	4	18.8779	19.6652	18.588	18.7172	18.6208	19.163	19.201	19.0986	18.8548	18.7858	19.0194	-0.629537	-0.267531	0.353698	0.0446504
m.20460	Pmi_629902_Z	ZZEF1_MOUSE_Zinc_finger_ZZ-type_and_EF-hand_domain-containi..CUT			3.395	0.5991	1.58306	1	1	1	0	16.294	15.9701	16.2444	16.2176	15.4756	16.3184	15.985	16.1795	15.2145	16.4209	16.0451	-0.152869	-0.267456	0.64519	0.535674
PMI_027098; PMI_017496; m.30720	None; None; Pmi_667500_P	XP_022094041.1 PAX-interacting protein 1-like isoform X2 [Acanthaster planci] (id=77.22%; len=180; e=2.21E-88) ; XP_022094040.1 PAX-interacting protein 1-like isoform X1 [Acanthaster planci] (id=80.79%; len=531; e=0.00E+00) ; PAXI1_HUMAN_PAX-interacting_protein_1	2426	1	3.282	0.4628	1.90221	1	1	0	0	14.3731	13.9904	14.2739	14.0511	14.1758	14.6813	14.4186	14.1915	14.4402	13.805	14.2464	-0.0148193	-0.266593	0.951561	0.324915
PMI_021697; PMI_002517		XP_022090873.1 Golgi-associated plant pathogenesis-related protein 1-like [Acanthaster planci] (id=92.00%; len=150; e=3.27E-100) ; XP_022090873.1 Golgi-associated plant pathogenesis-related protein 1-like [Acanthaster planci] (id=92.59%; len=135; e=1.06E-89)	2794	3	3.585	0.7953	0.753086	3	3	0	0	18.9932	19.2017	19.2542	19.3434	19.1864	19.4308	19.4677	19.6216	19.6058	19.2226	18.8926	0.163859	-0.266378	0.334033	0.324585
m.9818	Pmi_552630_F	FAAH_ARATH_Fatty_acid_amide_hydrolase			3.777	0.5912	1.41847	2	2	1	1	17.4415	18.0039	17.9689	17.9701	17.9894	18.571	18.5266	18.1335	18.029	18.2517	18.1533	0.253451	-0.265743	0.532955	0.18706
PMI_003508		XP_022110336.1 proton-coupled folate transporter-like isoform X1 [Acanthaster planci] (id=50.00%; len=490; e=4.92E-160)			1.153	0.307	1.32833	1	1	1	0	16.9997	17.3786	16.8014	16.708	16.5633	16.6103	16.6822	16.6581	16.2536	16.6223	16.2787	-0.49822	-0.265368	0.199528	0.151573
m.11286; PMI_000371	Pmi_568920_R; None	RS23_DERVA_40S_ribosomal_protein_S23; XP_011679331.1 PREDICTED: 40S ribosomal protein S23, partial [Strongylocentrotus purpuratus] (id=93.06%; len=144; e=2.22E-92)	1770	7	4.124	0.7277	0.708104	16	7	0	6	23.3558	23.3933	23.3211	23.2459	23.1687	23.3439	23.3713	23.4572	23.3043	23.0736	22.9991	-0.129323	-0.265098	0.0851083	0.0879747
m.6582	Pmi_507630_D	DIAP2_HUMAN_Protein_diaphanous_homolog_2			5.95	0.7286	0.112058	7	6	2	0	20.2847	20.2528	20.4869	20.3105	20.3908	20.5122	20.5949	20.4808	20.1663	20.2899	20.3379	0.127334	-0.264634	0.120312	0.0169139
m.37492	56675	XP_022106586.1 CUGBP Elav-like family member 3 isoform X1 [Acanthaster planci] (id=93.85%; len=553; e=0.00E+00)			3.832	0.5563	0.738177	14	8	1	7	22.0917	22.1902	22.0803	22.184	22.0793	22.5071	22.287	22.2797	22.003	22.1	22.1783	-0.0264083	-0.264151	0.704241	0.0501511
PMI_020281; PMI_017635; m.44124; m.16618	None; None; 66226; Pmi_609170_n	XP_022098740.1 uncharacterized protein LOC110983634 isoform X1 [Acanthaster planci] (id=78.64%; len=440; e=0.00E+00) ; XP_022098740.1 uncharacterized protein LOC110983634 isoform X1 [Acanthaster planci] (id=78.85%; len=435; e=0.00E+00) ; XP_022098740.1 uncharacterized protein LOC110983634 isoform X1 [Acanthaster planci] (id=78.46%; len=441; e=0.00E+00) ; no_annot	2120	1	4.022	0.6397	1.65084	2	1	0	0	15.198	17.4748	15.5232	16.8001	15.4279	16.7077	15.6084	15.9611	15.0751	15.6009	16.8103	-0.419336	-0.263605	0.778295	0.690566
m.20331	Pmi_629280_B	BCA1_CAEBR_Beta_carbonic_anhydrase_1			4.521	0.6957	0.958122	7	6	2	4	21.6368	21.7617	21.6701	21.7484	21.7674	22.0807	22.1273	22.0017	21.6905	21.8563	21.8731	0.0294	-0.263275	0.724891	0.0256225
m.24559; m.41809	Pmi_647230_A; 63198	ASH2L_MOUSE_Set1/Ash2_histone_methyltransferase_complex_s..CUT; XP_022101083.1 set1/Ash2 histone methyltransferase complex subunit ASH2-like isoform X1 [Acanthaster planci] (id=90.08%; len=635; e=0.00E+00)	2251	5	2.996	0.6428	1.48163	5	5	0	0	18.7891	18.8169	18.7502	18.7534	18.881	19.0995	19.1009	19.2993	19.0191	18.9363	18.7552	-0.00813173	-0.263011	0.871519	0.0635455
PMI_015286; PMI_005702		XP_022104517.1 hemK methyltransferase family member 2-like [Acanthaster planci] (id=71.03%; len=214; e=8.82E-89) ; XP_022104517.1 hemK methyltransferase family member 2-like [Acanthaster planci] (id=71.96%; len=214; e=2.30E-90)	764	1	3.794	0.6207	0.564179	1	1	0	0	15.103	15.1259	15.4421	15.4601	15.6153	15.7516	15.1224	15.4653	14.9126	14.7949	15.8435	0.391409	-0.262781	0.0160513	0.535682
m.31164	Pmi_668660_G	GNAI_ASTPE_Guanine_nucleotide-binding_protein_G(i)_subunit_alpha			7.857	0.8149	0.251475	18	8	0	8	22.3863	22.308	22.2182	22.4498	22.3728	22.683	22.5675	22.7052	22.4594	22.3676	22.3407	-0.000230119	-0.262654	0.997852	0.00993389
PMI_011043; PMI_027363; m.18450	None; None; Pmi_619851_S	XP_022089579.1 serine/arginine-rich splicing factor 1-like [Acanthaster planci] (id=92.94%; len=184; e=3.03E-98) ; XP_022089579.1 serine/arginine-rich splicing factor 1-like [Acanthaster planci] (id=84.15%; len=183; e=3.93E-92) ; SRSF1_CHICK_Serine/arginine-rich_splicing_factor_1	619	1	3.952	0.6245	1.3608	1	1	0	0	15.4466	16.3047	15.5911	16.1086	15.9949	16.455	16.5757	16.0194	15.1722	16.3114	16.7815	0.0225735	-0.26169	0.967184	0.647825
m.49582; m.12465; PMI_016836	74196; Pmi_579050_R; None	XP_022083701.1 40S ribosomal protein S13 [Acanthaster planci] (id=96.69%; len=151; e=2.76E-101) ; RS13_ICTPU_40S_ribosomal_protein_S13; XP_022083701.1 40S ribosomal protein S13 [Acanthaster planci] (id=96.69%; len=151; e=7.45E-102)	985	9	6.018	0.768	0.796961	31	9	0	0	23.9778	24.0184	23.9248	24.063	24.0595	24.4532	24.4595	24.4765	24.2411	24.1554	24.2081	0.0176628	-0.261535	0.749069	0.00583909
m.54652; m.17295	81336; Pmi_613561_S	XP_022091289.1 saccharopine dehydrogenase-like oxidoreductase [Acanthaster planci] (id=83.87%; len=434; e=0.00E+00) ; SCPDL_HUMAN_Saccharopine_dehydrogenase-like_oxidoreductase	1933	13	5.044	0.7691	0.563312	29	13	0	12	23.2463	23.3525	23.1368	23.1445	23.1364	23.3639	23.4747	23.4773	23.2588	23.1307	23.1443	-0.160181	-0.260708	0.202925	0.00931209
m.28569; PMI_015389; m.24970	Pmi_661022_E; None; 35791	EGFLA_BOVIN_Pikachurin; XP_022092221.1 pikachurin-like [Acanthaster planci] (id=78.40%; len=449; e=0.00E+00) ; XP_022092221.1 pikachurin-like [Acanthaster planci] (id=80.55%; len=838; e=0.00E+00)	685	1	3.678	0.7039	1.02878	1	1	0	0	16.0445	15.7762	15.9631	15.9954	16.0412	16.2377	16.6466	16.3371	15.8117	16.0862	16.5418	0.0895747	-0.260592	0.624346	0.36265
m.23838	Pmi_644310_n	no_annot			5.815	0.7014	0.545302	6	4	3	1	19.0697	19.2364	19.0331	18.9691	19.0164	19.2117	19.3265	19.2381	18.9816	19.0089	19.0046	-0.146842	-0.260361	0.317343	0.0133721
PMI_016670		XP_022082526.1 prostaglandin reductase 1-like [Acanthaster planci] (id=48.93%; len=327; e=3.40E-86)			6.164	0.7984	0.241985	45	7	2	3	25.5302	25.6061	25.5024	25.4984	25.5217	25.6776	25.7721	25.7987	25.5623	25.4411	25.4663	-0.0606653	-0.259541	0.348637	0.00758346
PMI_024953; m.1704	None; Pmi_338760_A	XP_022092970.1 UDP-galactose:fucoside alpha-3-galactosyltransferase-like isoform X4 [Acanthaster planci] (id=69.72%; len=142; e=6.19E-64) ; AGTA_DICDI_UDP-galactose_fucoside_alpha-3-galactosyltransferase	1324	1	2.117	0.6382	1.44223	1	1	0	0	15.9533	16.1903	15.5763	15.6714	15.7071	16.3647	16.0273	15.8629	15.4641	16.0295	15.9828	-0.420211	-0.259477	0.146594	0.33157
m.26631; PMI_003233; m.26635; m.29682	38701; None; 38705; Pmi_664441_n	XP_022093824.1 uncharacterized protein LOC110981009 [Acanthaster planci] (id=68.25%; len=274; e=1.17E-122) ; XP_022093824.1 uncharacterized protein LOC110981009 [Acanthaster planci] (id=67.52%; len=274; e=2.44E-122) ; XP_022093824.1 uncharacterized protein LOC110981009 [Acanthaster planci] (id=67.88%; len=274; e=1.69E-121) ; no_annot	1886	4	3.924	0.7374	1.18173	6	4	0	3	18.6599	18.7592	18.7055	18.4844	18.5293	18.7888	18.8655	18.9563	18.8247	18.6063	18.4013	-0.136492	-0.259447	0.201714	0.156446
m.16223; m.16233; m.16257	21547; 21555; 21572	XP_022102003.1 uncharacterized protein LOC110985345 [Acanthaster planci] (id=75.82%; len=488; e=0.00E+00) ; XP_022102003.1 uncharacterized protein LOC110985345 [Acanthaster planci] (id=77.40%; len=385; e=0.00E+00) ; XP_022102003.1 uncharacterized protein LOC110985345 [Acanthaster planci] (id=75.81%; len=372; e=0.00E+00)	826	2	5.402	0.5774	0.911442	3	2	0	1	16.3664	16.2874	16.2959	16.2582	16.4068	16.5519	16.577	16.3684	16.3492	16.1654	16.2065	-0.00659505	-0.258753	0.919155	0.0412366
PMI_010381		XP_022088552.1 uncharacterized protein LOC110978123 isoform X3 [Acanthaster planci] (id=61.69%; len=864; e=0.00E+00)			1.824	0.3717	2.69303	1	1	1	0	14.3303	14.6418	14.3628	13.9115	13.7895	14.0079	14.7647	14.4029	14.4799	14.5172	13.4032	-0.464778	-0.258375	0.145987	0.583423
m.337	683	XP_022098980.1 neurobeachin-like isoform X2 [Acanthaster planci] (id=95.69%; len=116; e=2.80E-65)			4.778	0.7114	1.72013	2	2	1	0	18.9714	19.1461	18.7134	18.8128	18.8008	19.1687	19.2964	19.0467	18.6806	18.8181	19.2418	-0.283095	-0.257107	0.158153	0.265115
m.21144; PMI_003026	Pmi_633110_F; None	F184A_HUMAN_Protein_FAM284A; XP_022080895.1 protein FAM284A-like [Acanthaster planci] (id=81.03%; len=1012; e=0.00E+00)	437	1	1.946	0.4579	1.57924	1	1	0	0	13.0845	13.7998	13.6763	13.6167	13.6843	13.8638	13.9894	13.7236	13.0114	13.9674	13.8281	0.216906	-0.256631	0.652826	0.483255
m.22434; PMI_004851	Pmi_638870_T; None	TBL1R_MOUSE_F-box-like/WD_repeat-containing_protein_TBL1XR1; XP_022088197.1 F-box-like/WD repeat-containing protein TBL1XR1 [Acanthaster planci] (id=88.64%; len=132; e=2.29E-76)	2424	1	2.695	0.4694	1.55096	1	1	0	0	16.2144	16.4318	16.72	16.7651	16.6809	16.769	16.7971	16.8455	16.8319	16.3903	16.4247	0.398927	-0.254922	0.15501	0.211789
PMI_017724		XP_022092247.1 U2 small nuclear ribonucleoprotein A'-like isoform X2 [Acanthaster planci] (id=73.63%; len=91; e=3.12E-29)			2.849	0.5553	1.87732	1	1	1	0	17.7236	17.507	17.6319	17.3741	17.5985	17.9826	17.805	17.8052	17.7134	17.5001	17.6146	-0.0804895	-0.254894	0.609494	0.0406743
m.29635; PMI_021219	Pmi_664340_D; None	DDX18_HUMAN_ATP-dependent_RNA_helicase_DDX18; XP_022082128.1 ATP-dependent RNA helicase HAS1-like [Acanthaster planci] (id=64.04%; len=559; e=0.00E+00)	2381	1	2.15	0.3074	1.09894	1	1	0	0	14.2439	14.322	14.2	14.1416	13.9364	14.2467	14.3252	14.2415	14.2373	13.943	13.869	-0.190342	-0.254718	0.129829	0.14532
m.22868; m.21645	Pmi_640565_C; 29909	CASC4_XENLA_Protein_casc4; XP_022087006.1 trichohyalin-like isoform X8 [Acanthaster planci] (id=77.03%; len=222; e=2.68E-113)	2149	6	4.384	0.7437	0.588454	9	6	0	4	20.0241	20.1309	19.8724	19.9825	20.0698	20.2583	20.3853	20.3606	20.0888	20.05	20.1017	-0.102585	-0.254576	0.287525	0.0130323
PMI_025338		XP_022095084.1 collagen alpha-5(IV) chain-like [Acanthaster planci] (id=81.04%; len=327; e=7.03E-174)			3.888	0.7409	1.10106	6	4	0	0	18.8134	18.9209	18.8171	18.7338	18.7099	18.9752	19.1368	19.0803	18.9416	18.7509	18.7372	-0.113526	-0.254203	0.230487	0.0401788
PMI_008973; m.14911; PMI_009709	None; Pmi_598190_T; None	XP_022084476.1 uncharacterized protein LOC110975911 isoform X1 [Acanthaster planci] (id=74.05%; len=158; e=2.98E-72) ; TIM9B_XENLA_Mitochondrial_import_inner_membrane_transloca..CUT; XP_022084476.1 uncharacterized protein LOC110975911 isoform X1 [Acanthaster planci] (id=74.68%; len=158; e=4.50E-74)	2225	1	2.919	0.5683	1.24581	1	1	0	0	17.8435	18.2311	17.685	17.8147	17.7128	18.0527	17.7806	18.1146	17.7232	17.6935	17.7691	-0.299778	-0.254034	0.357463	0.125947
m.29159; m.56708; m.56706; PMI_007639; PMI_017357	Pmi_662720_M; 84705; 84702; None; None	MT21D_HUMAN_Methyltransferase-like_protein_21D; XP_022105819.1 protein-lysine methyltransferase METTL21D-like isoform X2 [Acanthaster planci] (id=83.18%; len=214; e=1.35E-125) ; XP_022105819.1 protein-lysine methyltransferase METTL21D-like isoform X2 [Acanthaster planci] (id=82.71%; len=214; e=4.21E-125) ; XP_022105819.1 protein-lysine methyltransferase METTL21D-like isoform X2 [Acanthaster planc…	402	1	2.333	0.3712	2.03484	1	1	0	0	15.4256	16.5425	16.314	16.3954	15.5308	16.345	16.2756	16.2475	15.8787	15.9157	16.3115	0.0960576	-0.254033	0.895557	0.204281
PMI_022638		XP_022091518.1 E3 ubiquitin-protein ligase MYCBP2-like [Acanthaster planci] (id=80.59%; len=814; e=0.00E+00)			3.054	0.6018	0.98386	2	2	1	1	18.0634	18.2652	17.9393	17.8256	17.9337	18.0919	18.1467	18.2312	18.1527	17.8513	17.7041	-0.264826	-0.253908	0.19979	0.186986
PMI_019445		XP_022096479.1 carbohydrate sulfotransferase 14-like [Acanthaster planci] (id=60.61%; len=429; e=1.11E-168)			2.184	0.4908	0.961435	1	1	1	0	17.4322	17.4775	17.3417	17.5161	17.734	18.0559	17.7154	17.7808	17.4163	17.6746	17.6995	0.0757708	-0.253878	0.575505	0.141344
PMI_001327; PMI_003217; m.40635	None; None; 61347	XP_022095305.1 tctex1 domain-containing protein 2-like [Acanthaster planci] (id=90.37%; len=135; e=5.29E-87) ; XP_022095305.1 tctex1 domain-containing protein 2-like [Acanthaster planci] (id=90.44%; len=136; e=2.78E-88) ; XP_022095305.1 tctex1 domain-containing protein 2-like [Acanthaster planci] (id=89.72%; len=107; e=1.87E-66)	2642	1	2.159	0.4761	1.45776	1	1	0	0	20.7344	20.7499	20.3482	20.6956	20.7081	21.1448	21.2746	21.2331	21.0899	20.8276	20.9735	-0.158188	-0.253851	0.31162	0.059336
m.54590; PMI_024705; m.54581; m.27550	81216; None; 81206; Pmi_657791_D	XP_022092571.1 protein DEK-like [Acanthaster planci] (id=67.91%; len=134; e=6.40E-39) ; XP_022092571.1 protein DEK-like [Acanthaster planci] (id=74.63%; len=272; e=4.28E-124) ; XP_022092571.1 protein DEK-like [Acanthaster planci] (id=69.55%; len=509; e=2.14E-171) ; DEK_RAT_Protein_DEK	2218	1	4.669	0.7038	1.34736	1	1	0	0	17.2514	17.6153	17.3962	17.3869	17.5067	17.7982	17.5857	17.865	17.5676	17.2377	17.6823	-0.00335802	-0.253834	0.988319	0.195542
m.31158; m.30281; m.30277	Pmi_668792_M; 45077; 45076	MIA3_BOVIN_Melanoma_inhibitory_activity_protein_3; XP_022093121.1 basic proline-rich protein-like isoform X1 [Acanthaster planci] (id=83.13%; len=326; e=7.53E-164) ; XP_022093122.1 basic proline-rich protein-like isoform X2 [Acanthaster planci] (id=83.44%; len=314; e=8.05E-159)	1794	6	5.792	0.8365	0.997383	7	6	0	0	19.2868	19.5206	19.0573	19.1856	19.2977	19.576	19.6858	19.7759	19.3912	19.4129	19.4744	-0.223501	-0.253043	0.261346	0.0331569
PMI_021037; m.29733	None; Pmi_664560_H	XP_022088957.1 heterogeneous nuclear ribonucleoprotein L-like isoform X3 [Acanthaster planci] (id=90.27%; len=226; e=4.06E-131) ; HNRPL_HUMAN_Heterogeneous_nuclear_ribonucleoprotein_L	893	2	5.205	0.7238	1.63309	3	2	0	1	20.5354	20.435	20.6912	20.6474	20.6056	20.826	20.8993	20.8384	20.4657	20.6306	20.7092	0.162894	-0.252743	0.13928	0.0608313
m.30128; PMI_006613; m.49756; PMI_010617	Pmi_665772_T; None; 74477; None	TIM_HUMAN_Protein_timeless_homolog; XP_022107896.1 protein timeless homolog [Acanthaster planci] (id=82.96%; len=1373; e=0.00E+00) ; XP_022107896.1 protein timeless homolog [Acanthaster planci] (id=92.90%; len=493; e=0.00E+00) ; XP_022107896.1 protein timeless homolog [Acanthaster planci] (id=82.76%; len=1375; e=0.00E+00)	2117	1	2.664	0.3247	1.75904	1	1	0	0	14.1737	14.2023	14.0226	13.9183	13.7518	14.5103	14.2381	14.1575	14.187	13.9931	13.9683	-0.290438	-0.252467	0.0622822	0.129781
m.18180	23857	XP_022081756.1 aspartyl aminopeptidase-like [Acanthaster planci] (id=88.74%; len=453; e=0.00E+00)			4.773	0.7136	0.768204	21	12	1	11	22.4155	22.5329	22.3238	22.4825	22.4476	22.7957	22.8752	22.9402	22.5977	22.6195	22.6379	-0.0562315	-0.252009	0.527716	0.0201806
m.8233; PMI_018919	12933; None	XP_022085428.1 SRC kinase signaling inhibitor 1-like isoform X2 [Acanthaster planci] (id=79.60%; len=402; e=0.00E+00) ; XP_022085429.1 SRC kinase signaling inhibitor 1-like isoform X3 [Acanthaster planci] (id=76.01%; len=1088; e=0.00E+00)	1415	1	1.686	0.5516	0.303927	1	1	0	0	13.1407	13.4042	13.4987	12.9598	13.2855	13.4142	13.3275	13.5414	13.4043	13.4569	12.6686	-0.0244548	-0.251092	0.91268	0.429545
m.9368	Pmi_547420_G	GNAS_HOMAM_Guanine_nucleotide-binding_protein_G(s)_subunit_alpha			3.558	0.5867	0.857798	5	3	1	2	21.1207	21.0057	20.9697	21.1997	21.145	21.356	21.2539	21.3488	21.0222	21.0749	21.1088	0.0416226	-0.250893	0.676207	0.00463182
m.55564; m.55565; m.55563	82718; 82719; 82717	XP_022104856.1 NACHT, LRR and PYD domains-containing protein 2-like [Acanthaster planci] (id=48.23%; len=141; e=4.31E-26) ; XP_022104856.1 NACHT, LRR and PYD domains-containing protein 2-like [Acanthaster planci] (id=45.52%; len=134; e=1.23E-24) ; XP_022104856.1 NACHT, LRR and PYD domains-containing protein 2-like [Acanthaster planci] (id=46.58%; len=161; e=3.87E-31)	1993	1	1.497	0.3353	1.31902	1	1	0	0	20.8645	21.3426	20.8248	20.366	20.6475	20.9934	21.2045	20.3729	19.9379	20.7468	21.1355	-0.490785	-0.250258	0.241531	0.596754
m.30372	Pmi_666510_S	ST1C2_HUMAN_Sulfotransferase_1C2			4.433	0.746	0.222973	7	5	0	4	20.5035	20.4256	20.569	20.2933	20.5158	20.5507	20.4871	20.4913	20.2368	20.3183	20.2239	-0.00517437	-0.25003	0.959477	0.00342335
m.29156; m.26210	43189; Pmi_653340_D	XP_022104577.1 DNA ligase 4-like [Acanthaster planci] (id=91.72%; len=930; e=0.00E+00) ; DNLI4_HUMAN_DNA_ligase_4	1365	3	3.849	0.6916	1.37682	3	3	0	2	17.709	17.9972	17.7975	17.7271	17.9646	17.9295	18.0461	18.0775	17.6132	17.864	17.8259	-0.0233848	-0.249988	0.901302	0.0644447
PMI_007912; m.54830	None; 81585	XP_022085170.1 protein SET-like [Acanthaster planci] (id=93.50%; len=246; e=3.05E-170) ; XP_022085170.1 protein SET-like [Acanthaster planci] (id=82.82%; len=291; e=5.79E-162)	1674	6	6.265	0.807	0.478197	26	6	0	0	24.1661	24.2319	24.1587	24.1169	24.0636	24.2722	24.3462	24.4249	24.3375	23.9935	23.9639	-0.0859035	-0.249413	0.165274	0.162713
m.15196; m.8541	Pmi_600280_n; 13354	no_annot; XP_022094038.1 actin cytoskeleton-regulatory complex protein PAN1-like [Acanthaster planci] (id=64.44%; len=270; e=2.38E-124)	849	2	2.467	0.6023	1.18593	2	2	0	0	16.0035	15.7933	16.0059	16.2019	16.2019	16.4134	16.3856	16.5312	16.2855	16.0145	16.2825	0.238174	-0.249233	0.208896	0.0909139
PMI_029094		XP_022081987.1 guanosine-3',5'-bis(diphosphate) 3'-pyrophosphohydrolase MESH1-like [Acanthaster planci] (id=91.27%; len=126; e=1.97E-78)			4.704	0.6845	1.00087	5	4	2	2	19.531	19.7034	19.6744	19.4919	19.5447	19.7463	19.7127	19.6751	19.5092	19.4742	19.4036	-0.0468697	-0.249039	0.6946	0.00424024
m.26987; m.24767	39265; Pmi_647883_Z	XP_022110200.1 zinc finger protein 420-like [Acanthaster planci] (id=72.56%; len=1126; e=0.00E+00) ; ZN229_HUMAN_Zinc_finger_protein_229	647	1	2.462	0.5326	0.103267	12	1	0	0	23.3869	23.5796	23.5103	23.7637	23.5465	23.5957	23.8894	23.8133	23.4125	23.6199	23.5215	0.123598	-0.248229	0.414594	0.0889005
m.16104	Pmi_606300_C	CSKP_MOUSE_Peripheral_plasma_membrane_protein_CASK			4.96	0.7762	0.574169	4	4	3	1	17.7791	17.839	17.6591	17.8291	17.7919	18.0187	18.0511	18.1427	17.8041	17.9366	17.7275	-0.0490378	-0.248092	0.473036	0.034723
m.19381	Pmi_624660_F	FBP1L_XENLA_Formin-binding_protein_1-like			6.016	0.7989	1.21928	6	6	0	4	19.0185	18.8883	18.6474	18.9488	18.8373	18.9475	19.1854	19.1987	18.7791	18.9605	18.8485	-0.142267	-0.247833	0.284619	0.0736752
m.50482; PMI_017987; m.19845	75557; None; Pmi_626705_G	XP_022107171.1 G protein-coupled receptor kinase 5-like isoform X2 [Acanthaster planci] (id=94.32%; len=563; e=0.00E+00) ; XP_022107170.1 G protein-coupled receptor kinase 5-like isoform X1 [Acanthaster planci] (id=89.47%; len=323; e=0.00E+00) ; GRK5_HUMAN_G_protein-coupled_receptor_kinase_5	1580	2	4.005	0.6325	1.19888	2	2	0	0	16.5312	16.5887	16.3319	16.3097	16.4158	16.6731	16.9596	16.8535	16.4978	16.6349	16.6104	-0.207478	-0.247701	0.0194131	0.0785803
m.39285	59335	XP_022105257.1 ribosome-binding protein 1-like isoform X4 [Acanthaster planci] (id=68.03%; len=147; e=2.88E-48)			4.478	0.7464	0.363761	12	8	1	7	22.1821	22.2874	22.1235	22.0609	22.11	22.4902	22.4593	22.5143	22.3047	22.1899	22.2273	-0.136602	-0.247301	0.202955	0.00829221
m.22354; m.22352; PMI_004144	31092; 31089; None	XP_022109902.1 mechanosensory protein 2-like isoform X2 [Acanthaster planci] (id=87.82%; len=271; e=1.23E-158) ; XP_022109902.1 mechanosensory protein 2-like isoform X2 [Acanthaster planci] (id=89.30%; len=271; e=2.06E-161) ; XP_022109902.1 mechanosensory protein 2-like isoform X2 [Acanthaster planci] (id=79.60%; len=299; e=5.20E-150)	321	11	6.268	0.8125	0.20178	42	11	0	7	24.0879	23.8963	23.8765	24.0234	23.9631	24.4727	24.3453	24.4267	24.2182	24.1966	24.0882	-0.0377797	-0.247185	0.765273	0.0108864
PMI_012374		XP_022108497.1 sequestosome-1-like isoform X1 [Acanthaster planci] (id=66.46%; len=486; e=0.00E+00)			3.16	0.7593	0.496516	6	6	0	6	19.2347	19.3221	19.3426	19.0671	19.2062	19.2567	19.4338	19.4724	19.3916	19.0647	18.9653	-0.0730864	-0.247074	0.482066	0.186844
m.11207	Pmi_568340_N	NUBP2_NEMVE_Cytosolic_Fe-S_cluster_assembly_factor_NUBP2_..CUT			3.764	0.6865	0.909408	2	2	1	1	16.9254	16.9185	16.6543	16.5484	16.884	16.9219	17.0087	16.9521	16.6641	16.6119	16.8655	-0.226377	-0.247013	0.149444	0.0735483
m.28496; m.17336	41985; Pmi_613970_S	XP_022106725.1 succinate--CoA ligase [ADP/GDP-forming] subunit alpha, mitochondrial-like [Acanthaster planci] (id=90.52%; len=327; e=0.00E+00) ; SUCA_COLLI_Succinyl-CoA_ligase_subunit_alpha,_mitochondrial	905	15	5.689	0.8179	0.1462	63	15	0	15	25.3238	25.267	25.3291	24.9351	25.1717	25.2831	25.2908	25.2957	24.9885	25.1529	24.989	-0.150049	-0.246393	0.319616	0.0453657
m.16503	Pmi_608540_N	NHRF2_HUMAN_Na(+)/H(+)_exchange_regulatory_cofactor_NHE-RF2			4.366	0.6667	0.175249	10	7	3	4	21.1294	21.1232	21.0838	20.936	21.0092	21.1992	21.414	21.3851	21.1559	21.0953	21.0091	-0.116641	-0.246008	0.111103	0.0458465
PMI_006597; m.11759	None; Pmi_573710_F	XP_022084923.1 F-box/LRR-repeat protein 20-like [Acanthaster planci] (id=70.51%; len=434; e=0.00E+00) ; FXL20_HUMAN_F-box/LRR-repeat_protein_20	2027	1	4.155	0.5957	1.09356	1	1	0	0	15.6459	15.342	15.2504	15.9014	15.8478	15.8084	15.532	15.5734	15.2153	15.4331	15.5277	0.172612	-0.245882	0.551547	0.123815
PMI_003152; m.24350	None; 34698	XP_022104482.1 60S ribosomal protein L19-like [Acanthaster planci] (id=97.49%; len=199; e=8.03E-136) ; XP_022104482.1 60S ribosomal protein L19-like [Acanthaster planci] (id=97.49%; len=199; e=2.29E-135)	2017	12	5.583	0.7725	0.018502	40	12	0	7	24.8552	24.9068	24.8472	24.6538	24.7845	24.936	24.9311	24.8963	24.6736	24.6821	24.6709	-0.119181	-0.2456	0.163619	0.00144407
PMI_017637		XP_022098750.1 parkin coregulated gene protein homolog [Acanthaster planci] (id=88.33%; len=240; e=7.88E-156)			4.661	0.637	0.563544	4	4	2	2	20.0953	20.1719	20.0914	19.7709	20.0124	20.2937	20.1554	20.0891	19.6839	20.049	20.0719	-0.175383	-0.244517	0.205226	0.181733
PMI_022514; PMI_024092		XP_022109373.1 uncharacterized protein LOC110989353 [Acanthaster planci] (id=72.85%; len=932; e=0.00E+00) ; XP_022109373.1 uncharacterized protein LOC110989353 [Acanthaster planci] (id=74.81%; len=770; e=0.00E+00)	794	1	2.221	0.5547	1.01271	1	1	0	0	13.8947	14.3412	13.3502	13.8055	13.8146	13.7406	13.9311	13.7934	14.3234	12.7287	13.6799	-0.461213	-0.244353	0.233934	0.651439
PMI_008368		XP_022092702.1 centrosomal protein of 95 kDa-like isoform X2 [Acanthaster planci] (id=71.08%; len=778; e=0.00E+00)			1.268	0.3099	0.928833	1	1	1	0	18.2209	18.709	18.4536	17.4496	18.2813	18.7399	18.1481	18.4489	17.1845	18.6807	18.7397	-0.403412	-0.24401	0.382524	0.686645
PMI_018764; m.33674; m.29991	None; 50394; Pmi_665430_N	XP_022085731.1 protein NipSnap homolog 2-like [Acanthaster planci] (id=84.95%; len=299; e=0.00E+00) ; XP_022085731.1 protein NipSnap homolog 2-like [Acanthaster planci] (id=90.71%; len=280; e=0.00E+00) ; NIPS2_HUMAN_Protein_NipSnap_homolog_2	2001	5	5.257	0.7487	0.288285	8	5	0	3	22.2167	22.3864	22.218	22.0282	22.1154	22.5463	22.5733	22.4038	22.3787	22.1895	22.2233	-0.181008	-0.243978	0.225186	0.0364178
m.8834	Pmi_540421_n	no_annot			2.749	0.4347	1.22674	1	1	1	0	15.204	15.3752	14.7628	15.1187	15.0525	15.2097	15.0697	15.4502	14.9703	15.3209	14.7085	-0.31157	-0.243289	0.111356	0.32103
m.8339	Pmi_534210_R	RU1C_BRAFL_U1_small_nuclear_ribonucleoprotein_C			3.419	0.5452	1.4585	2	2	2	0	16.8219	17.0025	16.9303	16.6079	16.8957	16.8637	17.0784	17.0862	16.5645	16.8848	16.8507	-0.100923	-0.242787	0.515455	0.131318
m.56956	85152	XP_022098540.1 actin-related protein 2/3 complex subunit 4 [Acanthaster planci] (id=97.02%; len=168; e=8.97E-116)			5.046	0.7568	0.036004	21	7	3	4	23.244	23.316	23.2881	22.887	23.0393	23.094	23.1647	23.1167	22.7785	22.9635	22.9057	-0.208533	-0.242585	0.211117	0.0341663
m.26528; m.26700	38530; Pmi_655020_C	XP_022106339.1 calumenin-like isoform X3 [Acanthaster planci] (id=87.93%; len=323; e=0.00E+00) ; CALU_BOVIN_Calumenin	1791	8	6.353	0.8306	0.342981	12	8	0	8	22.88	22.8493	22.8028	22.5901	22.7265	22.7497	22.9269	22.9149	22.8219	22.5668	22.4752	-0.158176	-0.242543	0.119172	0.129785
PMI_013012; m.28838	None; Pmi_661771_R	XP_022083005.1 ral GTPase-activating protein subunit alpha-1-like isoform X2 [Acanthaster planci] (id=81.94%; len=1678; e=0.00E+00) ; RGPA1_MOUSE_Ral_GTPase-activating_protein_subunit_alpha-1	2103	3	4.064	0.5977	0.402783	3	3	0	2	18.3582	18.5195	18.4832	18.1665	18.2975	18.4813	18.5525	18.563	18.411	18.3123	18.1503	-0.123129	-0.241029	0.391302	0.0741818
PMI_007086		VBB28430.1 unnamed protein product [Acanthocheilonema viteae] (id=77.31%; len=141; e=3.35E-73)			3.969	0.6281	1.24188	5	3	1	0	20.3853	20.2426	20.3327	20.1046	20.2251	20.2512	20.3308	20.4258	20.1014	20.1483	20.0354	-0.0931474	-0.240882	0.420353	0.0217187
PMI_000978; m.26744	None; 38888	XP_024104732.1 WD repeat-containing protein 3 isoform X1 [Pongo abelii] (id=51.32%; len=949; e=0.00E+00) ; XP_022100676.1 WD repeat-containing protein 3-like [Acanthaster planci] (id=87.87%; len=816; e=0.00E+00)	1114	3	4.125	0.6669	0.692989	3	3	0	2	20.0396	20.5999	19.8464	19.4312	19.6266	20.2163	20.1973	19.4788	19.0469	19.6807	20.4462	-0.685026	-0.239549	0.208164	0.643861
m.18683; m.18695; m.18694; m.22347	24631; 24649; 24646; Pmi_638420_C	XP_022079104.1 CUGBP Elav-like family member 2 isoform X18 [Acanthaster planci] (id=89.05%; len=274; e=1.37E-165) ; XP_022079104.1 CUGBP Elav-like family member 2 isoform X18 [Acanthaster planci] (id=93.13%; len=262; e=1.54E-169) ; XP_022079094.1 CUGBP Elav-like family member 1-A isoform X9 [Acanthaster planci] (id=93.75%; len=224; e=1.26E-143) ; CELF2_DANRE_CUGBP_Elav-like_family_member_2	118	4	3.408	0.6893	0.853653	9	4	0	3	19.6745	19.8719	19.7593	19.5829	19.8031	19.9763	20.012	19.8419	19.5749	19.7745	19.7633	-0.0581424	-0.239139	0.675962	0.0474209
m.4563	Pmi_466860_N	NISCH_RAT_Nischarin			4.556	0.6999	1.48587	2	1	1	0	16.6245	16.6526	16.7181	16.8376	16.7162	16.7301	16.9179	16.8157	16.4677	16.7712	16.5093	0.118779	-0.238483	0.0860204	0.112294
m.32114; m.28947	48017; Pmi_661960_A	XP_022095321.1 arrestin domain-containing protein 1-like [Acanthaster planci] (id=36.53%; len=271; e=3.32E-47) ; ARRD3_BOVIN_Arrestin_domain-containing_protein_3	2343	3	2.939	0.6549	0.577877	3	3	0	1	17.3443	17.4413	17.1946	17.3264	17.4051	17.5839	17.6728	17.6123	17.3322	17.4046	17.4177	-0.0840779	-0.238165	0.362288	0.00309696
PMI_017679		XP_022092298.1 gamma-crystallin N-like [Acanthaster planci] (id=85.41%; len=233; e=3.32E-137)			3.599	0.7394	0.649136	2	2	2	0	16.4093	16.7241	16.7664	16.8884	16.9965	17.1923	16.9241	17.2727	16.6872	17.0202	16.9673	0.317077	-0.238143	0.259592	0.18187
m.18214; PMI_028584	Pmi_618641_V; None	VANG1_HUMAN_Vang-like_protein_1; XP_022101314.1 vang-like protein 2-B [Acanthaster planci] (id=91.73%; len=556; e=0.00E+00)	2464	1	3.952	0.6495	1.24126	1	1	0	0	17.6702	17.6202	17.6297	17.4956	17.7832	17.8818	17.775	17.8631	17.549	17.5231	17.7351	-0.009013	-0.237569	0.925488	0.0515812
m.37713	57061	57061|g.37713 type:internal len:103 gc:universal 57061:306-1(-)			5.794	0.8255	0.466597	11	7	1	0	20.5271	20.7037	20.4077	20.5202	20.599	20.8436	20.994	20.8481	20.6298	20.6144	20.729	-0.106434	-0.237512	0.424506	0.0210145
m.25775	Pmi_651770_T	TDRD1_HUMAN_Tudor_domain-containing_protein_1			6.324	0.7736	0.122913	15	13	0	11	21.2722	21.3427	21.2184	21.1933	21.2885	21.5183	21.5865	21.5378	21.3417	21.3432	21.2465	-0.0740062	-0.23707	0.230088	0.00569969
m.6421; PMI_007077	Pmi_504450_D; None	DAP1_HUMAN_Death-associated_protein_1; XP_022093920.1 death-associated protein 1-like [Acanthaster planci] (id=79.78%; len=89; e=1.24E-39)	856	3	3.646	0.7007	0.439989	48	3	0	0	24.0113	24.0416	24.0008	23.7105	23.7433	24.0733	24.1387	24.1232	24.0534	23.7864	23.7859	-0.20825	-0.236529	0.148091	0.11115
PMI_006011		XP_022105466.1 elongation factor 1-delta-like isoform X1 [Acanthaster planci] (id=63.31%; len=278; e=3.99E-89)			8.962	0.8358	0.569422	26	12	2	0	23.4016	23.4337	23.276	23.3728	23.3596	23.5881	23.7294	23.8726	23.6195	23.4416	23.4216	-0.0815125	-0.235835	0.102988	0.0892867
m.47044; m.21199; m.47046; PMI_001203; PMI_027074	70519; Pmi_633310_D; 70521; None; None	XP_022089003.1 uncharacterized protein LOC110978367 isoform X2 [Acanthaster planci] (id=57.43%; len=249; e=1.99E-79) ; DNLZ_HUMAN_DNL-type_zinc_finger_protein; XP_022089003.1 uncharacterized protein LOC110978367 isoform X2 [Acanthaster planci] (id=57.03%; len=249; e=6.27E-79) ; XP_022089003.1 uncharacterized protein LOC110978367 isoform X2 [Acanthaster planci] (id=55.04%; len=258; e=4.84E-76) ; X…	970	2	3.285	0.4947	1.09767	2	2	0	0	19.6179	19.9147	19.459	19.4256	19.5818	19.9935	19.9602	19.9935	19.676	19.7248	19.8392	-0.277512	-0.235699	0.291668	0.0340948
PMI_021175; m.17771	None; Pmi_616006_N	XP_022103560.1 nucleoside diphosphate-linked moiety X motif 19-like [Acanthaster planci] (id=72.07%; len=401; e=0.00E+00) ; NUD19_XENLA_Nucleoside_diphosphate-linked_moiety_X_motif_1..CUT	1035	2	3.774	0.5367	1.32487	3	2	0	0	17.7757	17.7293	17.7234	17.4439	17.5615	17.9013	17.8329	17.9127	17.4569	17.8977	17.5867	-0.176235	-0.235173	0.154324	0.21075
PMI_015851; PMI_019759; m.52546; m.23373	None; None; 78295; Pmi_642660_M	XP_022099431.1 MAP kinase-activated protein kinase 2-like isoform X1 [Acanthaster planci] (id=82.27%; len=440; e=0.00E+00) ; XP_022099439.1 MAP kinase-activated protein kinase 2-like isoform X2 [Acanthaster planci] (id=84.31%; len=376; e=0.00E+00) ; XP_022099431.1 MAP kinase-activated protein kinase 2-like isoform X1 [Acanthaster planci] (id=94.13%; len=375; e=0.00E+00) ; MAPK3_RAT_MAP_kinase-act…	2344	3	2.86	0.5381	1.02197	3	3	0	0	18.0025	17.9791	18.2543	17.8766	18.0075	18.0962	18.3727	18.1423	17.57	18.2653	18.0729	0.0552992	-0.234372	0.667721	0.381449
m.19338; PMI_023010	Pmi_624470_D; None	DAZP1_XENLA_DAZ-associated_protein_1; XP_022083044.1 heterogeneous nuclear ribonucleoprotein 1-like [Acanthaster planci] (id=50.80%; len=374; e=8.06E-97)	547	9	6.614	0.7855	0.745099	15	9	0	0	22.2067	22.1682	22.1438	22.0745	22.09	22.3265	22.426	22.3792	22.1647	22.1132	22.1518	-0.084691	-0.234013	0.064156	0.00517295
m.24897; m.24894	35687; 35686	XP_022103799.1 fumarate hydratase, mitochondrial-like isoform X1 [Acanthaster planci] (id=90.58%; len=435; e=0.00E+00) ; XP_022103799.1 fumarate hydratase, mitochondrial-like isoform X1 [Acanthaster planci] (id=87.98%; len=466; e=0.00E+00)	726	12	6.312	0.8085	0.713689	19	12	0	10	22.4469	22.4057	22.4391	22.2794	22.3246	22.6037	22.4886	22.5565	22.3007	22.3136	22.3329	-0.0786072	-0.233894	0.238502	0.014427
m.31022; PMI_003889; PMI_014256	Pmi_668362_I; None; None	INO80_DROME_Putative_DNA_helicase_Ino80; XP_022083274.1 DNA helicase INO80-like isoform X2 [Acanthaster planci] (id=79.58%; len=916; e=0.00E+00) ; XP_022083274.1 DNA helicase INO80-like isoform X2 [Acanthaster planci] (id=83.48%; len=448; e=0.00E+00)	320	1	3.093	0.6133	1.3303	1	1	0	0	13.6253	13.8732	14.048	14.214	14.325	14.2789	14.4485	14.0654	14.0713	14.116	13.9049	0.446428	-0.233553	0.103235	0.159836
PMI_015020		XP_022098628.1 amine oxidase [flavin-containing] B-like [Acanthaster planci] (id=68.91%; len=238; e=1.40E-104)			4.586	0.6454	1.60587	2	2	2	0	18.3654	18.4429	18.6297	18.3606	18.4547	18.4818	18.7872	18.7328	18.464	18.3825	18.4548	0.0775787	-0.233492	0.447343	0.122537
m.22000; m.45419	Pmi_636800_L; 68116	LEO1_HUMAN_RNA_polymerase-associated_protein_LEO1; XP_022090764.1 RNA polymerase-associated protein LEO1-like [Acanthaster planci] (id=67.31%; len=829; e=0.00E+00)	2392	3	3.589	0.5386	0.762099	3	3	0	0	17.3004	17.3234	17.1556	17.2114	17.2039	17.3166	17.4128	17.4367	17.192	17.1753	17.0999	-0.12157	-0.232964	0.0102741	0.00865268
m.3121; PMI_016117; m.28182	5587; None; Pmi_659722_n	XP_022097415.1 uncharacterized protein LOC110982924 [Acanthaster planci] (id=87.14%; len=210; e=2.30E-128) ; XP_022097415.1 uncharacterized protein LOC110982924 [Acanthaster planci] (id=73.54%; len=650; e=0.00E+00) ; no_annot	1796	1	4.09	0.7232	1.9227	1	1	0	0	14.8784	15.6241	14.6953	15.8799	14.705	15.7563	14.9683	15.1032	14.5451	15.1066	15.4795	-0.157898	-0.2322	0.791303	0.559255
PMI_006089; m.33805	None; 50598	XP_022096893.1 uncharacterized protein LOC110982623 isoform X4 [Acanthaster planci] (id=68.47%; len=758; e=0.00E+00) ; XP_022096918.1 uncharacterized protein LOC110982623 isoform X7 [Acanthaster planci] (id=82.93%; len=668; e=0.00E+00)	2607	7	5.959	0.7758	1.14348	9	7	0	7	21.0729	21.2899	21.0658	20.9928	20.9505	21.1552	21.3531	21.4011	21.0139	21.1418	21.0575	-0.178428	-0.232095	0.330202	0.0718497
m.12418	Pmi_578842_P	PAK1_BOVIN_Serine/threonine-protein_kinase_PAK_1			3.834	0.5509	0.416978	8	7	0	7	20.5921	20.7592	20.5967	20.5918	20.634	20.7971	20.8689	20.9503	20.5966	20.7437	20.583	-0.0682012	-0.231028	0.562587	0.0281431
m.27625	Pmi_657445_L	LRP2_HUMAN_Low-density_lipoprotein_receptor-related_protein_2			4.419	0.6721	0.587289	2	2	1	1	15.8329	16.1155	16.0456	15.9348	15.9822	16.3067	16.2423	16.1975	15.9111	15.9331	16.2101	0.0133475	-0.23071	0.940412	0.127759
m.54192	80593	XP_022099481.1 citron Rho-interacting kinase-like [Acanthaster planci] (id=90.39%; len=624; e=0.00E+00)			2.78	0.6675	0.828787	3	3	2	0	18.075	18.1718	17.5487	17.7994	18.0001	18.0172	18.3389	18.0094	17.5952	18.1786	17.9031	-0.340678	-0.229518	0.109305	0.325991
PMI_017023		XP_022080060.1 ATPase family AAA domain-containing protein 1-like [Acanthaster planci] (id=78.50%; len=93; e=8.09E-41)			7.196	0.8156	0.660311	4	2	1	0	19.3842	19.7359	19.4883	19.3992	19.4455	19.6935	19.6628	19.567	19.293	19.3859	19.5584	-0.115725	-0.22867	0.628859	0.0801966
m.885; m.8712	1693; Pmi_539000_Y	XP_022103353.1 probable low-specificity L-threonine aldolase 1 isoform X1 [Acanthaster planci] (id=80.00%; len=165; e=5.00E-95) ; YF64_CAEEL_Uncharacterized_protein_R102.4	659	3	3.767	0.7061	1.04682	3	3	0	1	20.35	20.5921	20.4109	20.1994	20.3519	20.5993	20.7341	20.8966	20.4785	20.5214	20.5445	-0.150342	-0.228569	0.411967	0.110659
m.16194; PMI_026143; m.29019	Pmi_606810_R; None; 43009	RPF1_RAT_Ribosome_production_factor_1; XP_022097160.1 ribosome production factor 1-like [Acanthaster planci] (id=83.95%; len=268; e=4.86E-157) ; XP_022097160.1 ribosome production factor 1-like [Acanthaster planci] (id=86.92%; len=321; e=0.00E+00)	1032	2	2.841	0.5375	0.906887	2	2	0	0	17.3857	17.3782	17.2893	17.1854	17.0561	17.5553	17.541	17.4582	17.3737	17.166	17.3296	-0.20499	-0.228404	0.0929218	0.0501147
PMI_012240		PIK50378.1 putative nesprin-1 [Apostichopus japonicus] (id=49.08%; len=1308; e=0.00E+00)			6.396	0.7459	0.566327	54	34	0	0	23.5037	23.5197	23.4524	23.4391	23.5044	23.6139	23.7889	23.7909	23.5614	23.5007	23.4465	-0.0463435	-0.228363	0.134778	0.039625
PMI_002586		XP_022083372.1 prolyl endopeptidase-like isoform X1 [Acanthaster planci] (id=76.68%; len=223; e=8.44E-112)			6.083	0.7685	0.265356	4	3	0	0	19.466	19.5565	19.4738	19.3615	19.6036	19.9473	20.0096	19.8993	19.6622	19.6933	19.8157	-0.0316403	-0.228346	0.729527	0.0201829
m.42555; m.28964	64180; Pmi_661981_W	XP_022095858.1 Werner syndrome ATP-dependent helicase homolog [Acanthaster planci] (id=71.56%; len=756; e=0.00E+00) ; WRN_XENLA_Werner_syndrome_ATP-dependent_helicase_homolog	1331	3	3.058	0.6184	1.04638	3	3	0	2	18.6133	18.7382	18.6369	18.4987	18.5732	18.575	18.6247	18.4591	18.1699	18.3857	18.4195	-0.106142	-0.227895	0.299195	0.0809855
m.17875; m.23293	23474; Pmi_642350_S	XP_022110737.1 solute carrier family 15 member 1-like isoform X1 [Acanthaster planci] (id=86.78%; len=575; e=0.00E+00) ; S15A1_RAT_Solute_carrier_family_15_member_1	143	1	2.69	0.413	1.49101	1	1	0	0	15.444	15.6652	15.7115	15.2829	15.5456	16.0944	15.6626	16.0232	15.9378	15.3526	15.8064	-0.0412777	-0.22779	0.821199	0.36691
m.22510; m.28878; PMI_016607	31356; Pmi_661850_T; None	sp|E2RYF8.1|TPX2_PATPE RecName: Full=Targeting protein for Xklp2 homolog; Short=TPX2 homolog; AltName: Full=Microtubule-associated protein TPX2 homolog (id=97.87%; len=891; e=0.00E+00) ; TPX2B_XENLA_Targeting_protein_for_Xklp2-B; sp|E2RYF8.1|TPX2_PATPE RecName: Full=Targeting protein for Xklp2 homolog; Short=TPX2 homolog; AltName: Full=Microtubule-associated protein TPX2 homolog (id=87.22%; len=9…	2232	3	2.879	0.6096	1.06352	3	3	0	3	17.8735	18.2855	17.5351	17.9401	18.2234	18.5559	18.5417	18.6204	18.3387	18.3703	18.3261	-0.179995	-0.227594	0.581016	0.00334087
m.3937	Pmi_444000_Z	ZFY21_BOVIN_Zinc_finger_FYVE_domain-containing_protein_21			3.057	0.5545	0.437577	1	1	1	0	15.331	15.427	15.575	15.6481	15.592	15.8582	15.5338	15.6036	15.4049	15.3451	15.5635	0.226056	-0.227387	0.0872573	0.137477
PMI_026494		XP_022098202.1 protein-glucosylgalactosylhydroxylysine glucosidase-like [Acanthaster planci] (id=78.24%; len=262; e=4.75E-146)			4.557	0.7503	0.234442	10	4	1	1	19.7615	19.6809	19.7561	19.8063	19.9026	20.0662	19.9719	19.992	19.7564	19.7775	19.818	0.100453	-0.226081	0.193979	0.00472089
m.25367	Pmi_650360_K	KPC1_LYTPI_Protein_kinase_C			4.637	0.8074	0.555576	25	16	0	16	22.3863	22.535	22.3165	22.301	22.3211	22.4984	22.5836	22.5798	22.3003	22.3452	22.339	-0.147752	-0.225741	0.29496	0.00563926
m.49356; m.49352	73799; 73795	XP_022088178.1 methylosome subunit pICln-like [Acanthaster planci] (id=72.02%; len=243; e=1.71E-114) ; XP_022088178.1 methylosome subunit pICln-like [Acanthaster planci] (id=72.02%; len=243; e=1.73E-114)	1318	6	7.21	0.87	0.457901	29	6	0	4	21.3496	21.2788	21.4177	20.6948	21.1068	21.2911	21.2918	21.3382	20.9868	21.1695	21.0907	-0.241103	-0.224698	0.368557	0.0420055
PMI_016877		XP_022097788.1 uncharacterized protein LOC110983127 [Acanthaster planci] (id=60.71%; len=56; e=7.98E-09)			3.954	0.6325	1.11871	4	3	3	0	20.6539	20.7394	20.3656	20.3918	20.3651	20.7314	20.8013	20.7672	20.6266	20.4335	20.5668	-0.322472	-0.224338	0.0733707	0.0464728
m.734	1451	XP_022109995.1 uncharacterized protein LOC110989723 [Acanthaster planci] (id=65.62%; len=256; e=3.75E-106)			2.837	0.6102	1.94584	1	1	1	0	15.4616	15.6654	15.3878	15.0165	15.1431	15.6472	15.3005	15.3919	15.0421	15.1247	15.5	-0.381033	-0.224279	0.0902959	0.274747
m.13060; m.11686	18511; Pmi_573010_H	XP_022104034.1 histone deacetylase 11-like isoform X2 [Acanthaster planci] (id=74.77%; len=432; e=0.00E+00) ; HDA11_HUMAN_Histone_deacetylase_11	2631	3	4.336	0.6727	1.34722	3	3	0	1	19.5281	19.5413	19.6097	19.6614	19.6508	19.8815	19.7637	19.7298	19.4164	19.6271	19.6589	0.105963	-0.224187	0.0126018	0.0787466
m.34764; m.20971	52355; Pmi_632190_S	XP_022087615.1 U4/U6.U5 tri-snRNP-associated protein 1-like [Acanthaster planci] (id=77.07%; len=798; e=0.00E+00) ; SNUT1_HUMAN_U4/U6.U5_tri-snRNP-associated_protein_1	1526	4	3.956	0.5929	0.741038	4	4	0	4	19.4967	19.6194	19.3353	19.1811	19.3775	19.492	19.7455	19.6829	19.4649	19.3344	19.4492	-0.26008	-0.223982	0.0667144	0.0793489
m.28931	Pmi_661800_R	RB27A_RAT_Ras-related_protein_Rab-27A			3.78	0.6985	0.762902	8	7	1	6	20.7908	20.6124	20.6574	20.8081	20.764	21.0088	20.8118	20.8226	20.6102	20.6497	20.7144	0.0415843	-0.222962	0.728135	0.0548034
m.16383	Pmi_607830_T	T11L1_HUMAN_T-complex_protein_11-like_protein_1			4.25	0.7193	0.579311	6	6	3	3	20.2422	20.5086	20.0761	20.178	20.2768	20.5393	20.5757	20.5697	20.3619	20.3222	20.3366	-0.198417	-0.221345	0.351609	0.000166129
PMI_012773; m.39054	None; 59009	XP_022096574.1 protein RRP5 homolog [Acanthaster planci] (id=76.78%; len=1641; e=0.00E+00) ; XP_022096574.1 protein RRP5 homolog [Acanthaster planci] (id=79.13%; len=1792; e=0.00E+00)	250	2	2.852	0.5894	1.14299	2	2	0	2	15.5319	15.4017	15.4136	14.725	15.4696	15.5641	15.2186	15.6284	14.7054	15.4668	15.5749	-0.264035	-0.221322	0.386747	0.519356
PMI_023919		XP_022095239.1 trafficking protein particle complex subunit 1-like [Acanthaster planci] (id=89.66%; len=145; e=4.35E-92)			4.038	0.6679	2.02526	1	1	1	0	16.3983	16.0823	16.2635	16.1928	16.3994	16.5264	16.3154	16.4243	16.1804	16.341	16.0814	0.0449415	-0.221145	0.826458	0.0880615
m.16867; PMI_001483; PMI_022000	Pmi_610800_N; None; None	NELFA_HUMAN_Negative_elongation_factor_A; XP_022080684.1 negative elongation factor A-like [Acanthaster planci] (id=81.23%; len=325; e=1.64E-163) ; XP_022080684.1 negative elongation factor A-like [Acanthaster planci] (id=83.96%; len=399; e=0.00E+00)	1671	1	2.464	0.474	1.00103	1	1	0	0	17.565	17.5144	17.2876	17.2062	17.3766	17.7011	17.64	17.453	17.2092	17.3484	17.5735	-0.249568	-0.220999	0.0234795	0.171889
m.27570; PMI_023135; PMI_008017; m.17020	40181; None; None; Pmi_611810_S	XP_022083546.1 O-phosphoseryl-tRNA(Sec) selenium transferase-like isoform X2 [Acanthaster planci] (id=89.66%; len=474; e=0.00E+00) ; XP_022083545.1 O-phosphoseryl-tRNA(Sec) selenium transferase-like isoform X1 [Acanthaster planci] (id=88.71%; len=443; e=0.00E+00) ; XP_022083546.1 O-phosphoseryl-tRNA(Sec) selenium transferase-like isoform X2 [Acanthaster planci] (id=81.78%; len=505; e=0.00E+00) ; …	2834	5	3.264	0.511	0.260606	5	5	0	5	19.4627	19.5814	19.3809	19.3402	19.4431	19.6927	19.7193	19.6716	19.4271	19.4876	19.5066	-0.134001	-0.220738	0.219676	0.00326906
PMI_004222		XP_022110787.1 40S ribosomal protein S9 [Acanthaster planci] (id=95.81%; len=191; e=1.80E-127)			3.924	0.7162	0.271747	33	10	10	0	23.9383	24.2013	23.9999	24.3584	24.3061	24.6938	24.5801	24.6178	24.2719	24.3304	24.6277	0.151702	-0.220562	0.459879	0.175403
PMI_007940		XP_022103725.1 lupus La protein homolog [Acanthaster planci] (id=77.47%; len=426; e=0.00E+00)			6.503	0.7933	0.140114	28	16	2	0	23.2646	23.2749	23.0916	23.2145	23.2057	23.3088	23.4945	23.5681	23.3634	23.2206	23.1257	-0.0991406	-0.220542	0.126832	0.101122
PMI_007235; PMI_012096; m.37388; m.17029	None; None; 56468; Pmi_611890_Z	RXN37195.1 palmitoyltransferase ZDHHC17 [Labeo rohita] (id=38.18%; len=220; e=4.56E-45) ; XP_022082898.1 palmitoyltransferase ZDHHC17-like [Acanthaster planci] (id=75.51%; len=543; e=0.00E+00) ; XP_022082898.1 palmitoyltransferase ZDHHC17-like [Acanthaster planci] (id=79.44%; len=248; e=3.26E-148) ; ZDH17_HUMAN_Palmitoyltransferase_ZDHHC17	2634	1	3.069	0.5402	1.50296	1	1	0	0	16.0981	16.0376	15.9898	15.9435	15.9899	16.228	16.0577	16.1217	15.8852	15.8903	15.9709	-0.0934928	-0.220346	0.145912	0.0280599
m.16045; m.55626	Pmi_605752_T; 82886	TIM24_BOVIN_Mitochondrial_import_inner_membrane_translocas..CUT; XP_022093442.1 dnaJ homolog subfamily C member 15-like [Acanthaster planci] (id=92.79%; len=111; e=4.71E-70)	1855	4	4.643	0.7181	0.51797	5	4	0	1	19.8514	19.9231	19.65	19.7815	19.9219	20.165	20.2102	20.2998	20.1806	19.9451	19.8896	-0.10277	-0.219883	0.328222	0.117373
PMI_010796		XP_022083333.1 ras-related protein Ral-A-like isoform X3 [Acanthaster planci] (id=93.17%; len=205; e=2.69E-136)			7.137	0.7772	0.975978	11	7	0	7	21.7888	21.8896	21.7254	21.7167	21.7225	22.1673	22.0589	22.173	22.0969	21.8644	21.7788	-0.117623	-0.219695	0.256985	0.134186
m.8507	Pmi_536140_n	no_annot			4.636	0.7819	0.096004	20	7	0	7	22.7878	22.9243	22.8596	22.7317	22.7052	22.801	22.9566	23.0411	22.8391	22.7094	22.5925	-0.0905326	-0.219228	0.391653	0.0936994
m.18164	Pmi_618320_S	SO4A1_HUMAN_Solute_carrier_organic_anion_transporter_fami..CUT			3.352	0.6548	0.98373	1	1	1	0	12.1571	11.4524	10.8363	12.8777	12.5288	12.9163	12.5262	12.9315	12.1228	12.6732	12.9211	0.276157	-0.219026	0.728624	0.474988
m.15470; m.14996	20845; Pmi_598760_C	XP_022083167.1 cilia- and flagella-associated protein 61-like [Acanthaster planci] (id=93.24%; len=207; e=4.40E-130) ; CT026_HUMAN_Uncharacterized_protein_C20orf26	884	4	5.781	0.655	0.415211	7	4	0	0	20.316	20.4341	20.5374	20.4389	20.5547	20.7268	20.7346	20.8167	20.3433	20.6321	20.646	0.135305	-0.21892	0.20654	0.148281
m.46991; PMI_026153	70405; None	XP_022098352.1 sperm flagellar protein 1-like [Acanthaster planci] (id=82.10%; len=257; e=1.41E-158) ; XP_022098352.1 sperm flagellar protein 1-like [Acanthaster planci] (id=67.51%; len=277; e=2.06E-124)	1570	1	2.816	0.3054	1.66562	1	1	0	0	17.3998	17.2937	17.3229	17.0837	17.2248	17.3583	17.4295	17.2671	16.7439	17.3017	17.3526	-0.136346	-0.218908	0.21704	0.378779
PMI_014882; PMI_010389; m.46752; m.27053; m.46753	None; None; 69985; Pmi_656090_T; 69986	XP_022098186.1 dual specificity protein kinase TTK-like [Acanthaster planci] (id=83.03%; len=554; e=0.00E+00) ; XP_022098186.1 dual specificity protein kinase TTK-like [Acanthaster planci] (id=78.22%; len=583; e=0.00E+00) ; XP_022098186.1 dual specificity protein kinase TTK-like [Acanthaster planci] (id=75.31%; len=243; e=1.80E-115) ; TTK_MOUSE_Dual_specificity_protein_kinase_TTK; XP_022098186.1 …	322	1	3.597	0.5402	1.55352	1	1	0	0	15.2322	14.9989	15.7177	15.5065	15.1154	15.5826	15.5969	15.6676	15.7444	15.0474	15.3995	0.330954	-0.218553	0.215963	0.390947
m.28461; PMI_019582; m.15642	Pmi_660630_C; None; 21011	CCD61_RAT_Coiled-coil_domain-containing_protein_61; XP_022107012.1 coiled-coil domain-containing protein 61-like [Acanthaster planci] (id=82.84%; len=408; e=0.00E+00) ; XP_022107012.1 coiled-coil domain-containing protein 61-like [Acanthaster planci] (id=87.72%; len=342; e=1.59E-177)	1978	1	2.412	0.2604	1.83698	1	1	0	0	19.4864	19.9086	19.5576	18.9612	19.0846	19.3861	19.6682	19.098	18.473	19.2107	19.8151	-0.496361	-0.217834	0.196234	0.644684
m.24421	Pmi_646682_E	EI2BB_TAKRU_Translation_initiation_factor_eIF-2B_subunit_beta			5.038	0.7322	0.718054	12	8	0	8	20.9246	21.0009	20.8913	20.9002	20.8815	21.1902	21.1571	21.1209	20.8923	20.93	20.9951	-0.0717063	-0.216919	0.306399	0.00592323
m.16232	21554	XP_022102003.1 uncharacterized protein LOC110985345 [Acanthaster planci] (id=76.08%; len=372; e=0.00E+00)			5.402	0.7374	0.890787	3	2	0	1	16.455	16.0567	16.2094	16.2391	16.3843	16.5616	16.5118	16.4299	16.5219	16.247	16.0844	0.0217517	-0.216674	0.931387	0.226515
m.23050	Pmi_641430_C	CN119_MOUSE_Uncharacterized_protein_C14orf119_homolog			3.152	0.5371	0.47141	4	2	1	1	19.077	19.3575	19.1277	19.0768	19.04	19.2685	19.4159	19.3271	18.9731	19.156	19.2325	-0.135752	-0.216652	0.507494	0.0873628
m.15265; PMI_011629; m.18902; PMI_009619	20699; None; Pmi_622271_T; None	XP_022092328.1 transmembrane protein 130-like isoform X4 [Acanthaster planci] (id=63.62%; len=448; e=0.00E+00) ; XP_022092326.1 transmembrane protein 130-like isoform X2 [Acanthaster planci] (id=60.14%; len=439; e=0.00E+00) ; TM230_MOUSE_Transmembrane_protein_130; XP_022092328.1 transmembrane protein 130-like isoform X4 [Acanthaster planci] (id=65.27%; len=262; e=8.40E-114)	2361	1	3.307	0.6223	2.0993	1	1	0	0	14.9802	14.6266	14.0497	13.6948	14.5942	14.2808	14.9912	13.7856	14.0123	14.3872	14.0081	-0.690487	-0.216643	0.116719	0.608264
PMI_018306		XP_022101218.1 filamin-B-like isoform X4 [Acanthaster planci] (id=86.00%; len=1436; e=0.00E+00)			7.444	0.8139	0.008173	153	62	0	3	26.2755	26.2381	26.2428	26.2768	26.2718	26.3569	26.5056	26.5626	26.322	26.2689	26.1842	0.00700834	-0.216643	0.780797	0.050216
PMI_013900; PMI_000336; m.18998	None; None; 25204	XP_022087078.1 vacuolar protein sorting-associated protein 13A-like [Acanthaster planci] (id=83.32%; len=1517; e=0.00E+00) ; XP_022087078.1 vacuolar protein sorting-associated protein 13A-like [Acanthaster planci] (id=79.69%; len=2033; e=0.00E+00) ; XP_022087078.1 vacuolar protein sorting-associated protein 13A-like [Acanthaster planci] (id=91.29%; len=310; e=2.62E-170)	1241	1	1.083	0.3029	2.31214	1	1	0	0	15.1127	15.7785	15.1228	13.8239	14.4054	14.6505	14.698	14.1691	12.9466	14.8824	15.0387	-0.994905	-0.216582	0.146436	0.781465
m.12294	17696	XP_022079888.1 integrin alpha-11-like isoform X2 [Acanthaster planci] (id=74.43%; len=176; e=8.90E-82)			2.542	0.594	0.657778	1	1	1	0	14.0933	14.4621	13.7972	14.2764	14.5092	14.7342	14.8422	15.024	14.6655	14.5913	14.6943	-0.0834531	-0.216444	0.785362	0.111839
m.28205; PMI_006661	Pmi_659872_M; None	MED14_HUMAN_Mediator_of_RNA_polymerase_II_transcription_sub..CUT; XP_022095205.1 mediator of RNA polymerase II transcription subunit 14-like [Acanthaster planci] (id=88.27%; len=1466; e=0.00E+00)	497	1	2.567	0.5516	0.907323	1	1	0	0	15.6321	15.6145	14.4268	15.2743	15.4598	15.4944	15.6989	16.107	16.0504	15.442	15.1592	-0.569684	-0.216218	0.214983	0.539238
m.9985	Pmi_554791_Y	YD286_HUMAN_Glutaredoxin-like_protein_C5orf63			4.887	0.701	0.828005	2	2	2	0	17.8603	17.6114	17.7164	17.7652	17.8484	17.9212	17.8762	18.0186	17.7902	17.641	17.7362	0.0408541	-0.216209	0.799669	0.0234386
PMI_019747		XP_022086654.1 uncharacterized protein LOC110977121 isoform X1 [Acanthaster planci] (id=62.96%; len=1385; e=0.00E+00)			6.324	0.7736	0.122913	15	13	0	3	20.8613	20.8602	20.7557	20.7882	20.8958	21.1354	21.1966	21.1401	20.9314	21.0093	20.8831	-0.0474639	-0.21612	0.378787	0.0132912
PMI_000882; PMI_015537		XP_022101545.1 origin recognition complex subunit 3-like [Acanthaster planci] (id=83.19%; len=577; e=0.00E+00) ; XP_022101545.1 origin recognition complex subunit 3-like [Acanthaster planci] (id=79.67%; len=541; e=0.00E+00)	286	4	3.434	0.7057	0.60681	4	4	0	4	18.2285	18.0715	18.3365	18.3087	18.6012	18.8052	18.677	18.5763	18.2769	18.5161	18.6173	0.26548	-0.216067	0.120137	0.159272
PMI_013891		XP_022095905.1 galactose-1-phosphate uridylyltransferase-like [Acanthaster planci] (id=88.93%; len=244; e=3.57E-166)			3.839	0.6886	0.015249	8	5	1	4	20.3491	20.35	20.3618	20.311	20.4109	20.5808	20.4656	20.5712	20.3369	20.4504	20.1822	0.0117327	-0.216015	0.723572	0.0910301
m.22236	Pmi_637900_C	CATA_PONAB_Catalase			5.229	0.8269	0.494098	21	15	0	15	23.0822	23.0875	22.9928	22.9999	22.9983	23.1045	23.3386	23.3967	23.1207	23.0202	23.0521	-0.0878364	-0.215621	0.00075836	0.1261
PMI_011489		XP_022086866.1 COMM domain-containing protein 6-like [Acanthaster planci] (id=77.78%; len=180; e=1.85E-97)			3.931	0.6393	1.10085	4	4	1	0	19.4847	19.5411	19.422	19.4106	19.6206	19.7937	19.8058	19.7902	19.5279	19.5713	19.6453	-0.0285287	-0.215079	0.728613	0.0227315
PMI_013772		XP_022111820.1 rab3 GTPase-activating protein catalytic subunit-like [Acanthaster planci] (id=82.74%; len=979; e=0.00E+00)			3.003	0.6687	1.64704	1	1	1	0	12.4575	12.6928	12.0381	12.2802	12.5096	12.5126	12.6918	12.5407	12.3868	12.293	12.4202	-0.299178	-0.214994	0.198583	0.0395476
m.31784	Pmi_670243_M	MACF1_HUMAN_Microtubule-actin_cross-linking_factor_1,_iso..CUT			7.711	0.8144	0.171876	54	35	3	21	24.3944	24.418	24.4045	24.2339	24.3848	24.4993	24.6158	24.6293	24.3078	24.4025	24.3898	-0.0651582	-0.214787	0.350121	0.0164652
PMI_002101		XP_022081826.1 chloride intracellular channel protein 5-like [Acanthaster planci] (id=80.18%; len=328; e=0.00E+00)			5.255	0.7163	0.109534	50	19	18	1	24.3328	24.3444	24.2846	24.2509	24.2769	24.32	24.5308	24.5545	24.3525	24.2381	24.1708	-0.0678066	-0.21467	0.0113374	0.0857885
PMI_008909		XP_022101217.1 filamin-A-like isoform X3 [Acanthaster planci] (id=87.94%; len=1534; e=0.00E+00)			7.444	0.8139	0.008173	150	64	0	3	26.2662	26.2336	26.2341	26.2629	26.2561	26.3478	26.4939	26.5515	26.3138	26.2598	26.1757	0.00111432	-0.214624	0.95858	0.0500062
m.45508; m.21290; PMI_015470	68238; Pmi_633790_A; None	XP_022086038.1 asparagine synthetase [glutamine-hydrolyzing]-like isoform X2 [Acanthaster planci] (id=81.71%; len=175; e=6.78E-99) ; ASNS_CHICK_Asparagine_synthetase_[glutamine-hydrolyzing]; XP_022086038.1 asparagine synthetase [glutamine-hydrolyzing]-like isoform X2 [Acanthaster planci] (id=88.14%; len=312; e=0.00E+00)	1959	1	3.897	0.6679	1.90002	1	1	0	0	16.9478	17.2509	16.8328	16.8922	16.8611	17.0325	17.229	16.9619	16.746	16.7585	17.0765	-0.237337	-0.214136	0.359204	0.19262
m.19203; m.14232; PMI_022793; PMI_017851	Pmi_623790_P; 19709; None; None	PTCD1_HUMAN_Pentatricopeptide_repeat-containing_protein_1; XP_022102385.1 pentatricopeptide repeat-containing protein 1, mitochondrial-like isoform X1 [Acanthaster planci] (id=72.55%; len=765; e=0.00E+00) ; XP_022102385.1 pentatricopeptide repeat-containing protein 1, mitochondrial-like isoform X1 [Acanthaster planci] (id=66.67%; len=648; e=0.00E+00) ; XP_022102389.1 pentatricopeptide repeat-cont…	1539	1	3.798	0.7478	2.54718	1	1	0	0	15.9148	16.0702	16.0457	15.8965	15.9356	16.22	15.9581	15.9127	15.0789	16.0022	16.3681	-0.0332171	-0.213812	0.752363	0.637485
m.49945; m.26755	74759; Pmi_655220_M	XP_022096626.1 S-adenosylmethionine synthase-like [Acanthaster planci] (id=92.93%; len=396; e=0.00E+00) ; METK2_HUMAN_S-adenosylmethionine_synthase_isoform_type-2	995	13	6.203	0.8053	0.147598	33	13	0	12	23.7726	23.785	23.7423	23.7199	23.7472	23.8054	23.9894	24.0109	23.8317	23.712	23.6212	-0.0423275	-0.213565	0.0272572	0.0752489
m.20041; m.34913; m.34922; PMI_011372	Pmi_627831_C; 52663; 52669; None	CHSTB_HUMAN_Carbohydrate_sulfotransferase_11; XP_022102794.1 carbohydrate sulfotransferase 11-like isoform X1 [Acanthaster planci] (id=72.09%; len=412; e=0.00E+00) ; XP_022102794.1 carbohydrate sulfotransferase 11-like isoform X1 [Acanthaster planci] (id=73.26%; len=374; e=0.00E+00) ; XP_022102794.1 carbohydrate sulfotransferase 11-like isoform X1 [Acanthaster planci] (id=73.12%; len=413; e=0.00E…	1680	1	2.547	0.5626	1.34184	1	1	0	0	17.1988	17.3855	17.2015	17.1558	17.354	17.6802	17.5408	17.4263	17.0792	17.3833	17.5446	-0.0549873	-0.213427	0.672987	0.260244
m.25478; PMI_014160	Pmi_650650_T; None	TMPS3_MOUSE_Transmembrane_protease_serine_3; XP_022093222.1 chymotrypsin-like elastase family member 2A isoform X4 [Acanthaster planci] (id=59.24%; len=395; e=2.91E-154)	642	1	1.872	0.3937	0.984489	1	1	0	0	18.6572	18.5849	18.7982	18.7146	18.6866	18.8166	18.818	18.9547	18.7847	18.6276	18.5369	0.112072	-0.213375	0.123838	0.0788674
m.13667	19158	XP_022102242.1 uncharacterized protein LOC110985497 isoform X2 [Acanthaster planci] (id=84.43%; len=488; e=0.00E+00)			6.259	0.797	0.313925	29	18	0	0	22.427	22.441	22.3848	22.3388	22.4541	22.5603	22.7025	22.7	22.4717	22.3953	22.4563	-0.0414473	-0.213177	0.341492	0.0281649
PMI_018874; PMI_011927		XP_003604262.1 short transmembrane mitochondrial protein 1 [Medicago truncatula] (id=49.06%; len=53; e=1.86E-07) ; RLM99356.1 hypothetical protein C2845_PM06G08610 [Panicum miliaceum] (id=46.67%; len=60; e=5.59E-07)	2629	2	3.033	0.5509	0.084565	2	2	0	0	19.0765	19.4336	19.0208	19.0012	19.2896	19.6228	19.6078	19.6128	19.4531	19.3726	19.3784	-0.151156	-0.21313	0.549495	0.0125776
PMI_022550		XP_022085770.1 carbonic anhydrase 1-like isoform X2 [Acanthaster planci] (id=65.07%; len=146; e=9.23E-59)			3.083	0.4523	0.485392	6	1	1	0	19.8837	19.9489	19.8943	19.5891	19.7928	19.9911	20.1089	19.9514	19.8179	19.7238	19.8712	-0.157558	-0.212868	0.216222	0.0295753
PMI_006869		XP_022100533.1 telomerase protein component 1-like [Acanthaster planci] (id=68.25%; len=904; e=0.00E+00)			4.114	0.6515	0.426982	6	6	2	2	19.7445	19.8487	19.8646	19.9591	20.0467	20.1244	20.336	20.1331	20.0233	19.9502	19.9826	0.160214	-0.212447	0.129703	0.0807079
PMI_002850		XP_022088973.1 quinone oxidoreductase-like [Acanthaster planci] (id=77.72%; len=193; e=2.13E-99)			6.344	0.7754	0.952432	5	4	0	2	19.0172	19.0869	19.1168	18.9257	18.952	19.2457	19.4064	19.0332	18.8165	18.9253	19.3082	-0.0538829	-0.211745	0.494571	0.320052
PMI_013213		XP_022109428.1 general transcription factor 3C polypeptide 3-like isoform X1 [Acanthaster planci] (id=70.34%; len=890; e=0.00E+00)			2.054	0.4917	0.165618	1	1	1	0	15.1511	15.3176	14.9106	15.3803	14.8704	15.2568	15.3887	15.4406	15.2516	15.0354	15.1647	-0.180544	-0.211479	0.402829	0.0651792
m.21769	Pmi_635891_H	HPCL1_RAT_Hippocalcin-like_protein_1			4.114	0.7414	0.511962	12	7	1	6	21.2139	21.2382	21.164	21.1416	21.194	21.3616	21.3856	21.4238	21.1584	21.1928	21.1855	-0.0595155	-0.211403	0.0559652	0.00154825
PMI_014334; m.25568; m.31570; PMI_004336	None; Pmi_650970_W; 47264; None	XP_022103779.1 WD repeat-containing protein 26-like [Acanthaster planci] (id=96.36%; len=439; e=0.00E+00) ; WDR26_XENTR_WD_repeat-containing_protein_26; XP_022103779.1 WD repeat-containing protein 26-like [Acanthaster planci] (id=95.64%; len=551; e=0.00E+00) ; XP_022103779.1 WD repeat-containing protein 26-like [Acanthaster planci] (id=78.45%; len=399; e=0.00E+00)	370	2	4.147	0.6364	0.430398	3	2	0	0	15.8453	16.4472	16.4702	16.5922	16.6687	16.8502	16.9588	16.8491	16.6563	16.7235	16.6443	0.430777	-0.211362	0.381794	0.0117686
m.24711; m.24706; m.10397	35337; 35334; Pmi_559680_C	XP_022084011.1 charged multivesicular body protein 1a-like [Acanthaster planci] (id=91.37%; len=197; e=2.52E-128) ; XP_022084011.1 charged multivesicular body protein 1a-like [Acanthaster planci] (id=92.08%; len=202; e=2.44E-133) ; CHM2A_XENLA_Charged_multivesicular_body_protein_1a	1188	3	2.805	0.533	1.16618	5	3	0	2	21.4035	21.4853	21.2712	21.2284	21.3054	21.4933	21.5758	21.5636	21.3959	21.3254	21.2774	-0.17606	-0.211337	0.0878433	0.0096385
PMI_018472		XP_022109981.1 heterogeneous nuclear ribonucleoprotein A1-like isoform X3 [Acanthaster planci] (id=77.78%; len=198; e=1.36E-103)			5.928	0.811	0.542973	9	6	1	5	20.1923	20.0998	20.1676	19.9539	19.9831	20.3014	20.2638	20.0445	19.8268	20.0639	20.0859	-0.111217	-0.211019	0.264884	0.141323
m.18520; PMI_023251; m.24319; m.24316	Pmi_620360_P; None; 34630; 34627	PDCL3_DANRE_Phosducin-like_protein_3; XP_022106908.1 phosducin-like protein 3 isoform X2 [Acanthaster planci] (id=89.19%; len=222; e=1.96E-135) ; XP_022106908.1 phosducin-like protein 3 isoform X2 [Acanthaster planci] (id=88.74%; len=222; e=1.35E-134) ; XP_022106908.1 phosducin-like protein 3 isoform X2 [Acanthaster planci] (id=88.29%; len=222; e=6.69E-134)	2638	1	4.443	0.6262	1.05114	2	1	0	0	19.1644	19.4225	19.141	18.9407	19.0837	19.4308	19.3924	19.2	18.9657	19.1822	19.2429	-0.238281	-0.210802	0.281174	0.130527
m.48316; m.14278; m.48318	72210; Pmi_593480_S; 72211	XP_022107344.1 semaphorin-1A-like isoform X1 [Acanthaster planci] (id=48.33%; len=747; e=0.00E+00) ; SEM2A_CAEEL_Semaphorin-1A; XP_022107344.1 semaphorin-1A-like isoform X1 [Acanthaster planci] (id=48.33%; len=747; e=0.00E+00)	564	8	4.281	0.7257	0.619297	13	8	0	6	21.2546	21.1505	21.0509	21.2451	21.2488	21.2875	21.4599	21.6546	21.313	21.3384	21.1201	-0.0209609	-0.210164	0.818318	0.183514
m.28017	41101	XP_022110064.1 NADH dehydrogenase [ubiquinone] 1 alpha subcomplex subunit 12-like [Acanthaster planci] (id=84.40%; len=141; e=3.37E-88)			2.959	0.6144	0.393476	7	4	0	4	21.6634	21.5788	21.5765	21.4045	21.6052	21.6371	21.6488	21.7658	21.5776	21.4121	21.4327	-0.0923743	-0.20977	0.309143	0.0366612
m.26674; m.42410; m.42408; PMI_009462	Pmi_654740_S; 64007; 64003; None	ST1C2_MOUSE_Sulfotransferase_1C2; XP_022098338.1 sulfotransferase 1C2A-like [Acanthaster planci] (id=72.18%; len=248; e=3.63E-133) ; XP_022098338.1 sulfotransferase 1C2A-like [Acanthaster planci] (id=67.92%; len=240; e=6.95E-117) ; XP_022098306.1 sulfotransferase family cytosolic 1B member 1-like [Acanthaster planci] (id=71.33%; len=150; e=3.25E-71)	2609	2	2.548	0.6001	0.688213	2	2	0	1	19.2113	19.3057	19.2158	19.1302	19.2164	19.2207	19.5245	19.4548	19.2446	19.1997	19.128	-0.0709776	-0.209218	0.342412	0.138691
m.17444; PMI_003502; m.17446; PMI_006834; m.24447	22859; None; 22860; None; Pmi_646762_n	XP_022091153.1 paramyosin-like [Acanthaster planci] (id=90.04%; len=492; e=0.00E+00) ; XP_022091153.1 paramyosin-like [Acanthaster planci] (id=87.73%; len=497; e=0.00E+00) ; XP_022091153.1 paramyosin-like [Acanthaster planci] (id=89.74%; len=234; e=3.41E-149) ; XP_022091153.1 paramyosin-like [Acanthaster planci] (id=89.02%; len=492; e=0.00E+00) ; no_annot	2594	1	1.388	0.3177	0.961468	1	1	0	0	16.6742	16.5897	16.3541	16.1096	16.2056	16.4655	16.9399	16.5427	16.5569	16.4454	16.319	-0.408878	-0.20895	0.0167797	0.292833
PMI_023003		XP_022102859.1 E3 ubiquitin-protein ligase MYLIP-like [Acanthaster planci] (id=89.46%; len=351; e=0.00E+00)			3.633	0.6548	0.500248	4	3	0	3	19.0154	18.9098	19.2075	19.0937	19.1155	19.5685	19.1017	18.9816	18.8287	19.1018	19.0957	0.17631	-0.20854	0.115729	0.375636
m.17793; PMI_009020; m.32460; PMI_019615	Pmi_616252_n; None; 48564; None	no_annot; XP_022083194.1 uncharacterized protein LOC110975222 [Acanthaster planci] (id=69.36%; len=682; e=0.00E+00) ; XP_022083194.1 uncharacterized protein LOC110975222 [Acanthaster planci] (id=80.81%; len=495; e=0.00E+00) ; XP_022083194.1 uncharacterized protein LOC110975222 [Acanthaster planci] (id=76.65%; len=681; e=0.00E+00)	2752	1	2.094	0.3252	1.07731	1	1	0	0	16.1534	15.9479	15.7881	15.8572	15.9273	16.8408	16.3403	16.6581	16.3101	16.4315	16.4733	-0.193103	-0.20809	0.282876	0.28859
PMI_015115		XP_022337389.1 BBSome-interacting protein 1-like [Crassostrea virginica] (id=76.67%; len=60; e=1.19E-23)			2.87	0.3753	1.3081	1	1	1	0	18.7886	18.7308	18.7443	18.8366	18.717	18.9763	19.0764	19.0078	18.7457	18.8816	18.809	0.00625694	-0.208085	0.901218	0.0155557
m.22279; m.32620; m.32619	Pmi_638160_n; 48744; 48743	no_annot; XP_022110753.1 uncharacterized protein LOC110990195 [Acanthaster planci] (id=64.00%; len=200; e=1.09E-85) ; XP_022110753.1 uncharacterized protein LOC110990195 [Acanthaster planci] (id=60.69%; len=290; e=4.06E-124)	2737	1	3.492	0.7274	1.78413	1	1	0	0	15.9615	15.8741	16.1201	15.9369	15.9743	16.1295	16.2926	16.181	16.0784	15.77	16.1306	0.0926357	-0.208044	0.28354	0.197424
m.16662	Pmi_609580_P	PTTG_MOUSE_Pituitary_tumor-transforming_gene_1_protein-int..CUT			5.47	0.7384	1.65862	4	4	4	0	18.8322	19.0505	18.6576	19.1086	18.719	18.9633	19.1344	19.1439	19.054	18.8294	18.7347	-0.112998	-0.207811	0.571924	0.149486
m.50664	75856	XP_022096135.1 uncharacterized protein LOC110982186 [Acanthaster planci] (id=65.77%; len=336; e=1.35E-144)			2.744	0.6013	0.40217	1	1	1	0	16.2675	15.9434	16.0251	15.9585	16.1662	16.1958	16.6911	16.2959	16.1052	16.1118	16.3443	-0.0555042	-0.207182	0.792703	0.310867
PMI_010673; PMI_010672; m.38899	None; None; 58705	XP_022099649.1 probable beta-D-xylosidase 2 [Acanthaster planci] (id=74.06%; len=401; e=0.00E+00) ; XP_022099649.1 probable beta-D-xylosidase 2 [Acanthaster planci] (id=65.91%; len=132; e=6.23E-50) ; XP_022099649.1 probable beta-D-xylosidase 2 [Acanthaster planci] (id=60.66%; len=61; e=1.49E-14)	2226	1	1.998	0.3113	0.293843	1	1	0	0	17.915	17.8178	17.7684	17.8423	18.0991	18.0579	18.4209	18.2547	17.9385	18.0361	18.141	0.036872	-0.205986	0.764172	0.18097
PMI_003339		XP_022085702.1 WD repeat and FYVE domain-containing protein 3-like [Acanthaster planci] (id=84.86%; len=2709; e=0.00E+00)			2.018	0.4108	0.944833	1	1	1	0	15.6237	15.2322	15.4607	15.3784	15.438	15.3146	15.1629	15.4322	15.5037	14.7339	15.0568	-0.00226088	-0.205082	0.992662	0.461385
m.24093	Pmi_645323_R	RMD3_XENLA_Regulator_of_microtubule_dynamics_protein_3			4.329	0.7793	0.119615	8	7	2	5	20.8127	20.9654	20.7895	20.942	20.9268	21.3331	21.2353	21.2796	21.1194	21.0176	21.0967	-0.00291942	-0.204773	0.977429	0.00824142
PMI_020741; PMI_004202; m.6317	None; None; Pmi_502770_S	XP_022086092.1 solute carrier family 22 member 15-like [Acanthaster planci] (id=91.67%; len=204; e=1.85E-133) ; XP_022086092.1 solute carrier family 22 member 15-like [Acanthaster planci] (id=87.66%; len=316; e=0.00E+00) ; S22AF_XENLA_Solute_carrier_family_22_member_15	2417	1	2.998	0.4169	1.40988	1	1	0	0	16.7954	16.9188	16.8204	16.5079	16.7837	16.6422	16.628	16.5952	16.399	16.6345	16.218	-0.153087	-0.204676	0.280659	0.230549
m.21568	29784	XP_022089160.1 cytoskeleton-associated protein 5-like isoform X4 [Acanthaster planci] (id=80.79%; len=229; e=4.97E-109)			5.552	0.7994	0.717355	7	6	1	0	20.8971	20.6756	20.6672	21.2139	20.7187	20.9817	20.9116	21.0588	20.905	20.735	20.6993	0.0802432	-0.204268	0.723734	0.0640887
m.20618; m.20619	28008; 28010	XP_022084408.1 uncharacterized protein LOC110975865 [Acanthaster planci] (id=48.61%; len=72; e=8.84E-18) ; XP_022084408.1 uncharacterized protein LOC110975865 [Acanthaster planci] (id=43.64%; len=165; e=3.82E-33)	2601	1	4.985	0.727	1.01511	1	1	0	0	18.6543	18.616	18.7226	18.8631	18.8129	18.9407	19.1019	18.8549	18.5452	18.7977	18.9436	0.164416	-0.203657	0.0426883	0.224789
m.21222; PMI_014081; m.22909; PMI_022571	Pmi_633510_F; None; 32111; None	FA45A_DANRE_Protein_FAM45A; XP_022086595.1 protein FAM45A-like [Acanthaster planci] (id=90.39%; len=354; e=0.00E+00) ; XP_022086595.1 protein FAM45A-like [Acanthaster planci] (id=90.06%; len=352; e=0.00E+00) ; XP_022086595.1 protein FAM45A-like [Acanthaster planci] (id=88.29%; len=350; e=0.00E+00)	2508	4	5.586	0.8277	0.708884	6	4	0	0	20.3166	20.3536	20.2418	20.2004	20.2878	20.4743	20.5001	20.5115	20.2974	20.2804	20.2986	-0.0917704	-0.203165	0.0611468	0.000452321
PMI_013253		XP_022096936.1 gamma-aminobutyric acid receptor-associated protein [Acanthaster planci] (id=100.00%; len=119; e=1.10E-82)			4.202	0.6473	1.39159	5	5	5	0	21.2825	21.1942	21.185	21.253	21.1188	21.1797	21.2907	21.4448	21.4138	20.9536	20.939	-0.0527953	-0.20293	0.449086	0.329449
m.14882; m.39337	Pmi_597940_M; 59426	MCEE_HUMAN_Methylmalonyl-CoA_epimerase,_mitochondrial; XP_022108691.1 methylmalonyl-CoA epimerase, mitochondrial-like isoform X1 [Acanthaster planci] (id=81.51%; len=119; e=6.63E-61)	294	4	5.859	0.7426	0.601695	8	4	0	0	20.7146	20.604	20.6159	20.6626	20.6769	20.9165	20.9473	21.0572	21.0549	20.5673	20.6904	-0.0074697	-0.20286	0.91575	0.298288
PMI_000638; PMI_000096; m.17143	None; None; Pmi_612632_S	XP_022092632.1 serine/threonine-protein kinase SMG1-like [Acanthaster planci] (id=81.06%; len=3623; e=0.00E+00) ; XP_022092632.1 serine/threonine-protein kinase SMG1-like [Acanthaster planci] (id=83.70%; len=3742; e=0.00E+00) ; SMG1_HUMAN_Serine/threonine-protein_kinase_SMG1	852	1	2.486	0.636	0.947893	1	1	0	0	16.1846	16.4078	16.1274	15.9907	16.0181	16.4839	16.4866	16.2499	15.8106	16.283	16.5185	-0.250771	-0.202761	0.235923	0.439629
m.20437	Pmi_629760_P	PSA2_HUMAN_Proteasome_subunit_alpha_type-2			6.754	0.8176	0.437695	36	12	3	9	23.826	23.6446	23.7754	23.9679	23.9929	24.0605	24.1038	24.2374	24.1026	23.9254	23.7664	0.176746	-0.202422	0.253372	0.161884
PMI_020133		XP_022104745.1 beta,beta-carotene 9',10'-oxygenase-like [Acanthaster planci] (id=57.33%; len=307; e=1.39E-108)			3.712	0.6665	0.683748	8	6	1	4	21.1299	21.4339	21.446	21.5351	21.3321	21.5498	21.4694	21.3813	21.3486	21.1944	21.2511	0.155799	-0.202141	0.482211	0.038344
m.24224	Pmi_645850_W	WAHS7_HUMAN_WASH_complex_subunit_7			3.503	0.6355	0.662355	8	8	0	8	20.8284	20.8255	20.9674	20.8331	20.9899	21.2297	21.5913	20.8617	20.3679	21.0743	21.6342	0.103192	-0.202117	0.169326	0.663313
m.5747; m.29145; PMI_028618	9523; Pmi_662680_P; None	XP_022083383.1 protein kinase C-binding protein 1-like isoform X1 [Acanthaster planci] (id=70.33%; len=300; e=1.97E-116) ; PKCB1_HUMAN_Protein_kinase_C-binding_protein_1; XP_022083383.1 protein kinase C-binding protein 1-like isoform X1 [Acanthaster planci] (id=66.54%; len=266; e=3.43E-90)	1943	1	2.584	0.517	1.07744	1	1	0	0	13.267	13.3886	13.033	13.2174	13.0715	13.0241	13.0477	13.1792	13.0279	12.7321	12.8848	-0.220542	-0.202084	0.0916435	0.126894
PMI_000617; m.38625; m.11862	None; 58286; Pmi_574730_G	XP_022083078.1 glutaredoxin-related protein 5, mitochondrial-like [Acanthaster planci] (id=86.81%; len=144; e=1.21E-92) ; XP_022083078.1 glutaredoxin-related protein 5, mitochondrial-like [Acanthaster planci] (id=88.81%; len=134; e=2.73E-88) ; GLRX5_DANRE_Glutaredoxin-related_protein_5,_mitochondrial	2714	2	3.572	0.7072	0.417884	3	2	0	1	20.2491	20.8292	20.2784	20.3448	20.2454	20.7359	20.7019	20.7544	20.5828	20.4497	20.5538	-0.249646	-0.201979	0.546857	0.0259835
m.47825; m.15777	71518; Pmi_604140_F	XP_022110769.1 rRNA 2'-O-methyltransferase fibrillarin-like [Acanthaster planci] (id=94.94%; len=237; e=2.83E-163) ; FBRL_XENLA_rRNA_2p-O-methyltransferase_fibrillarin	97	12	3.826	0.6988	0.123408	15	12	0	8	22.1199	21.9945	22.0948	22.0404	22.0086	22.0891	22.2309	22.2777	22.0107	22.0093	21.9727	-0.00922991	-0.201639	0.909031	0.0647141
PMI_015377; PMI_014914		XP_022097010.1 E3 ubiquitin-protein ligase RGLG4-like [Acanthaster planci] (id=81.07%; len=354; e=0.00E+00) ; XP_022097010.1 E3 ubiquitin-protein ligase RGLG4-like [Acanthaster planci] (id=80.51%; len=354; e=0.00E+00)	2353	1	4.739	0.6923	1.17718	1	1	0	0	15.0701	13.7063	14.6929	14.5055	15.0695	14.6856	14.4435	14.652	13.7531	14.7735	14.6502	0.367722	-0.201428	0.685039	0.598613
m.9233	Pmi_545750_E	EPN2_RAT_Epsin-2			5.04	0.774	0.232188	13	9	4	5	20.5155	20.59	20.5954	20.46	20.5687	20.8095	20.9411	20.9611	20.7473	20.7454	20.6149	-0.0113594	-0.201418	0.852138	0.0360156
m.23110; PMI_007707	Pmi_641600_U; None	UBP4_RAT_Ubiquitin_carboxyl-terminal_hydrolase_4; XP_022104012.1 ubiquitin carboxyl-terminal hydrolase 15-like [Acanthaster planci] (id=88.56%; len=769; e=0.00E+00)	1983	3	3.013	0.5018	0.068692	3	3	0	1	19.2379	19.2855	19.0518	18.9857	19.1609	19.4614	19.3094	19.4012	19.1862	19.1629	19.2196	-0.195614	-0.201111	0.0471835	0.0326976
PMI_006292		XP_022105592.1 acetylcholinesterase-like [Acanthaster planci] (id=83.77%; len=536; e=0.00E+00)			1.903	0.3127	1.93813	1	1	1	0	15.0134	15.8536	15.5263	14.9671	15.0361	15.6355	15.359	15.4363	15.04	15.7476	15.0405	-0.256984	-0.200892	0.651389	0.491045
PMI_012560; m.22193	None; Pmi_637720_I	XP_022092150.1 interferon regulatory factor 5-like [Acanthaster planci] (id=67.25%; len=345; e=1.26E-163) ; IRF6_HUMAN_Interferon_regulatory_factor_6	1047	1	3.163	0.57	1.26459	1	1	0	0	16.4032	16.3587	15.9083	15.6356	16.0619	16.1295	16.2138	15.8841	15.6321	16.1302	15.8643	-0.51233	-0.200241	0.0505327	0.32291
m.9406	14452	XP_022098628.1 amine oxidase [flavin-containing] B-like [Acanthaster planci] (id=91.39%; len=360; e=0.00E+00)			4.265	0.7106	0.846941	5	5	0	5	19.306	19.5423	19.3353	19.2583	19.3499	19.4788	19.6379	19.6455	19.333	19.3599	19.4689	-0.109608	-0.200105	0.519741	0.0466972
m.53547	79737	XP_022103725.1 lupus La protein homolog [Acanthaster planci] (id=79.34%; len=426; e=0.00E+00)			6.503	0.7933	0.140114	33	18	0	18	23.3609	23.3802	23.2132	23.3221	23.3251	23.3923	23.5696	23.6213	23.4422	23.3231	23.218	-0.0837462	-0.199959	0.14374	0.103052
PMI_013899; m.22709	None; Pmi_640110_R	XP_022092447.1 regulator of telomere elongation helicase 1-like isoform X1 [Acanthaster planci] (id=72.91%; len=1159; e=0.00E+00) ; RTEL1_DANRE_Regulator_of_telomere_elongation_helicase_1	2016	1	2.469	0.6168	1.1227	1	1	0	0	17.3808	17.4366	17.2672	17.4137	17.4694	17.6332	17.6313	17.5106	17.0679	17.4926	17.6166	-0.0252877	-0.199324	0.731471	0.35298
PMI_025763		XP_022093750.1 H/ACA ribonucleoprotein complex subunit 4-like [Acanthaster planci] (id=96.32%; len=299; e=0.00E+00)			5.497	0.7308	0.839909	3	3	3	0	17.5469	17.4353	17.7235	17.5996	17.5855	17.8044	17.7998	17.5878	17.3429	17.4996	17.7529	0.14509	-0.198906	0.166135	0.241094
PMI_021957		XP_022109674.1 rab GTPase-binding effector protein 1-like [Acanthaster planci] (id=74.02%; len=689; e=0.00E+00)			4.351	0.6689	0.103924	14	11	1	0	20.44	20.5844	20.3272	20.2398	20.323	20.6522	20.5764	20.5698	20.2881	20.5089	20.4048	-0.215547	-0.198866	0.168701	0.073046
PMI_008158		XP_022096693.1 ribosomal oxygenase 1-like [Acanthaster planci] (id=82.84%; len=239; e=2.34E-141)			5.282	0.7793	0.758448	7	6	2	0	20.3487	20.3143	20.3621	20.1781	20.3721	20.3756	20.2829	20.4248	20.2846	20.1494	20.0528	-0.027426	-0.198795	0.711075	0.0781873
PMI_009931		XP_022104056.1 tRNA (guanine-N(7)-)-methyltransferase non-catalytic subunit WDR4-like [Acanthaster planci] (id=65.22%; len=414; e=0.00E+00)			3.72	0.6194	1.32181	2	1	1	0	18.0547	18.2438	18.3009	17.9587	18.233	18.319	18.3724	18.301	18.2183	18.172	18.0057	0.0149684	-0.198777	0.922543	0.0790264
PMI_020682		ANN83889.1 centrin-2 [Patiria miniata] (id=100.00%; len=171; e=3.58E-117)			4.792	0.7529	0.78594	11	6	6	0	21.1257	21.2559	21.1628	21.163	21.1868	21.4552	21.4895	21.4055	21.1706	21.3013	21.2838	-0.0199613	-0.198165	0.810784	0.0214812
m.42681	64258	XP_022101214.1 filamin-A-like isoform X1 [Acanthaster planci] (id=91.67%; len=2184; e=0.00E+00)			7.565	0.8575	0.010986	271	111	0	111	26.9337	26.9853	26.9226	26.9159	26.9111	26.9806	27.1896	27.2332	26.9994	26.934	26.8763	-0.0429586	-0.19787	0.340404	0.110448
m.31737	Pmi_670120_L	LAMC1_XENTR_Laminin_subunit_gamma-1			4.513	0.7686	0.743182	8	6	0	6	19.7107	20.1904	19.9509	19.8675	19.9604	19.9516	20.2384	19.9789	19.7934	19.8311	19.9523	-0.0242533	-0.197342	0.935962	0.151037
m.24277; m.20919	34532; Pmi_632050_R	XP_022089991.1 28S ribosomal protein S31, mitochondrial-like [Acanthaster planci] (id=69.21%; len=406; e=0.00E+00) ; RT31_BOVIN_28S_ribosomal_protein_S31,_mitochondrial	2563	2	6.226	0.7074	0.820883	3	2	0	0	17.6573	17.4489	17.7225	17.8235	17.7232	17.9241	18.0487	17.6172	17.1858	17.7631	18.0504	0.203288	-0.196881	0.279646	0.539638
m.22312; m.29872	31030; Pmi_665131_C	XP_022111639.1 CCR4-NOT transcription complex subunit 6-like [Acanthaster planci] (id=92.42%; len=132; e=2.41E-81) ; CNO6L_HUMAN_CCR4-NOT_transcription_complex_subunit_6-like	2867	1	3.159	0.6432	1.3214	1	1	0	0	13.4673	13.3055	12.9679	13.3279	13.4082	13.2546	13.4413	13.0524	12.7075	13.5473	12.9043	-0.151698	-0.196425	0.408458	0.533943
m.15994	Pmi_605550_G	GST8_CAEEL_Probable_glutathione_S-transferase_8			6.152	0.7893	0.502017	39	12	5	7	25.6949	25.5883	25.6689	25.7149	25.6703	25.767	25.7412	25.7143	25.5099	25.5365	25.5874	0.0430296	-0.196235	0.56422	0.00330711
m.12131; PMI_010326	Pmi_576780_S; None	SEPT5_HUMAN_Septin-5; XP_022105146.1 septin-5-like isoform X4 [Acanthaster planci] (id=90.48%; len=420; e=0.00E+00)	2128	2	3.321	0.6778	1.17125	3	3	0	0	18.0236	18.1938	18.0514	17.3616	17.904	17.9366	18.0704	17.9592	17.3997	18.0255	17.9523	-0.336339	-0.196194	0.248289	0.426325
PMI_026541		XP_022088322.1 soma ferritin-like [Acanthaster planci] (id=85.88%; len=85; e=3.53E-47)			4.095	0.7702	0.837813	2	2	1	1	19.7391	19.8962	19.507	19.9079	19.6831	20.5156	20.5641	20.5188	20.3489	20.3632	20.2986	-0.118342	-0.195957	0.460399	0.00176279
PMI_009204; PMI_016024; m.29897; m.21617; m.29900	None; None; 44449; Pmi_635243_B; 44451	XP_022080520.1 borealin-like [Acanthaster planci] (id=71.52%; len=330; e=9.23E-145) ; XP_022080520.1 borealin-like [Acanthaster planci] (id=71.05%; len=228; e=8.21E-89) ; XP_022080520.1 borealin-like [Acanthaster planci] (id=79.05%; len=148; e=2.49E-79) ; BOREA_PONAB_Borealin; XP_022080520.1 borealin-like [Acanthaster planci] (id=77.88%; len=330; e=1.09E-170)	1560	1	3.587	0.6105	2.22149	1	1	0	0	16.5585	16.9237	16.9114	16.8035	16.4888	17.0853	16.9414	16.6783	16.5616	16.7378	16.8181	-0.00647611	-0.195847	0.979443	0.249644
m.10974; m.10975	16242; 16243	XP_022091009.1 uncharacterized protein LOC110979487 isoform X1 [Acanthaster planci] (id=50.00%; len=146; e=1.78E-24) ; XP_022091009.1 uncharacterized protein LOC110979487 isoform X1 [Acanthaster planci] (id=43.33%; len=150; e=2.60E-24)	1591	1	2.701	0.4757	3.05151	1	1	0	0	17.7752	17.9668	17.2939	16.7826	16.88	17.0936	17.1454	17.0514	16.8168	16.9427	16.9445	-0.885468	-0.195488	0.0176828	0.0238103
m.10557	Pmi_561301_n	no_annot			2.283	0.4529	0.749521	1	1	1	0	13.543	13.9541	13.749	13.673	14.0178	13.9344	14.0677	14.312	13.7228	13.9706	14.0343	0.0647213	-0.19544	0.81219	0.252538
m.23825	Pmi_644381_I	IPYR_DROME_Inorganic_pyrophosphatase			5.84	0.7636	0.333512	60	16	1	15	24.7496	24.7702	24.7889	24.6702	24.7641	24.862	24.8755	24.8732	24.7052	24.6719	24.6515	-0.0188639	-0.194032	0.659489	0.00414339
m.29433; PMI_013932; PMI_024733	Pmi_663590_Y; None; None	YGC1_SCHPO_UPF0661_TPR_repeat-containing_protein_C16D10.01c; XP_022080014.1 probable assembly chaperone of rpl4 isoform X1 [Acanthaster planci] (id=83.82%; len=408; e=0.00E+00) ; XP_022080014.1 probable assembly chaperone of rpl4 isoform X1 [Acanthaster planci] (id=85.61%; len=431; e=0.00E+00)	1507	1	2.983	0.4244	1.28799	1	1	0	0	16.285	16.3425	16.4048	16.0108	16.0109	16.2144	16.296	16.3375	16.1714	16.2582	15.8366	-0.171562	-0.193903	0.320613	0.267339
m.29352	Pmi_663292_S	SKEL1_DROME_Protein_Skeletor,_isoforms_B/C			4.4	0.7744	1.05225	5	5	1	4	19.5847	19.6491	19.5082	19.5029	19.5118	19.7455	19.8765	20.0687	19.7467	19.6922	19.6707	-0.109229	-0.193673	0.18052	0.169312
m.30074; PMI_019503	Pmi_665321_A; None	ABCB1_DICDI_ABC_transporter_B_family_member_1; XP_022085601.1 ABC transporter B family member 1-like [Acanthaster planci] (id=85.29%; len=578; e=0.00E+00)	160	13	6.093	0.8247	0.477078	20	13	0	8	21.591	21.396	21.4222	21.5921	21.5469	22.0009	21.8718	21.9088	21.8663	21.7419	21.5923	0.026942	-0.19365	0.834832	0.118531
m.14096	19569	XP_022094674.1 uncharacterized secreted protein ARB_06907-like [Acanthaster planci] (id=76.48%; len=625; e=0.00E+00)			2.48	0.5347	1.39006	2	2	0	2	16.3292	16.3804	16.2991	16.0551	16.0959	16.3408	16.3537	16.3305	16.0335	16.2095	16.2022	-0.204727	-0.193298	0.102399	0.076329
PMI_012702; m.15205; m.23021; m.15203	None; 20635; Pmi_641330_L; 20633	XP_022090002.1 leucine-, glutamate- and lysine-rich protein 1-like [Acanthaster planci] (id=86.08%; len=79; e=9.31E-38) ; XP_022090002.1 leucine-, glutamate- and lysine-rich protein 1-like [Acanthaster planci] (id=80.19%; len=621; e=0.00E+00) ; LEKR1_HUMAN_Leucine-,_glutamate-_and_lysine-rich_protein_1; XP_022090002.1 leucine-, glutamate- and lysine-rich protein 1-like [Acanthaster planci] (id=79…	1480	1	3.378	0.6761	2.03711	1	1	0	0	14.1054	14.4512	14.0396	13.4756	13.4066	13.379	13.5385	13.7187	13.4128	13.3513	13.2934	-0.637661	-0.192871	0.098484	0.179397
PMI_018224		XP_022093132.1 S-phase kinase-associated protein 1-like isoform X2 [Acanthaster planci] (id=95.06%; len=162; e=1.15E-100)			5.366	0.8025	0.122676	30	12	5	7	23.7247	23.8371	23.6513	23.7367	23.7329	23.8598	23.9929	23.8855	23.7311	23.7193	23.7106	-0.0739878	-0.192413	0.391509	0.0395811
m.26022	Pmi_652660_C	CE290_MOUSE_Centrosomal_protein_of_290_kDa			3.838	0.7176	1.34068	3	3	3	0	17.4256	17.6219	17.3537	17.2112	17.2345	17.4759	17.535	17.3987	17.1793	17.3048	17.349	-0.257308	-0.192184	0.189021	0.0436819
m.16840	22179	XP_022109357.1 advillin-like isoform X2 [Acanthaster planci] (id=90.29%; len=721; e=0.00E+00)			4.786	0.7828	0.427779	16	12	0	5	21.6851	21.8533	21.5829	21.5567	21.6194	21.6518	21.9312	21.8509	21.6124	21.5762	21.6693	-0.182881	-0.192028	0.262696	0.136576
PMI_004668		XP_022093520.1 neuroligin-4, X-linked-like [Acanthaster planci] (id=83.61%; len=720; e=0.00E+00)			1.499	0.2328	3.56296	1	1	1	0	18.5394	18.7581	18.4895	18.1536	18.2909	18.731	18.6809	18.357	18.1211	18.5285	18.5435	-0.337431	-0.191918	0.124333	0.35112
m.21668	Pmi_635403_R	RFFL_RAT_E3_ubiquitin-protein_ligase_rififylin			5.401	0.6893	1.1795	2	2	2	0	17.5004	17.627	17.4129	17.4872	17.7118	17.7746	17.6852	17.6052	17.2335	17.5238	17.7356	-0.0264239	-0.190686	0.825534	0.32005
PMI_001449		XP_023667714.1 heat shock factor-binding protein 1-like protein 1 [Paramormyrops kingsleyae] (id=77.42%; len=31; e=1.11E-07)			4.645	0.7412	1.24284	4	1	1	0	19.3136	19.3731	19.361	19.3847	19.4247	19.8299	19.5735	19.5378	19.065	19.5438	19.7632	0.0467561	-0.189769	0.326625	0.466987
m.22863; m.53281; m.53296	Pmi_640563_Z; 79392; 79396	ZC3HE_MACFA_Zinc_finger_CCCH_domain-containing_protein_14; XP_022087005.1 trichohyalin-like isoform X7 [Acanthaster planci] (id=75.42%; len=118; e=1.61E-26) ; XP_022087005.1 trichohyalin-like isoform X7 [Acanthaster planci] (id=71.55%; len=123; e=6.04E-24)	591	3	4.693	0.7621	1.08845	5	3	0	0	18.9028	19.1282	18.8157	18.7595	18.8879	19.2092	19.1102	19.1488	18.9321	18.9334	19.0335	-0.19451	-0.189761	0.313883	0.0133951
PMI_021797; PMI_028896		XP_022100098.1 probable pterin-4-alpha-carbinolamine dehydratase isoform X1 [Acanthaster planci] (id=90.83%; len=109; e=2.78E-66) ; XP_022100098.1 probable pterin-4-alpha-carbinolamine dehydratase isoform X1 [Acanthaster planci] (id=93.40%; len=106; e=8.80E-67)	2265	4	5.039	0.6896	0.361328	8	4	0	3	21.4618	21.498	21.3294	21.3278	21.3892	21.6239	21.7803	21.5552	21.2008	21.5215	21.6685	-0.131104	-0.18952	0.0191219	0.307557
m.6854	Pmi_512060_P	PGTA_PIG_Geranylgeranyl_transferase_type-2_subunit_alpha			4.732	0.7035	0.429669	4	3	0	2	17.2186	17.0936	17.1198	16.9873	16.8741	16.8849	17.0889	17.1442	16.7621	16.8478	16.9417	-0.162384	-0.18884	0.188825	0.127021
PMI_007525; m.20188	None; Pmi_628590_D	XP_022089673.1 LOW QUALITY PROTEIN: dystrobrevin beta-like [Acanthaster planci] (id=95.74%; len=728; e=0.00E+00) ; DTNB_HUMAN_Dystrobrevin_beta	2294	1	3.602	0.4953	0.48228	1	1	0	0	16.1437	16.5051	16.5501	16.5483	16.4251	16.6996	16.4618	16.3599	16.0944	16.4312	16.4298	0.183414	-0.188711	0.490365	0.279165
PMI_001565		XP_022093416.1 multidrug resistance-associated protein 4-like isoform X2 [Acanthaster planci] (id=74.35%; len=1119; e=0.00E+00)			3.802	0.6741	0.628078	2	2	0	1	16.7535	16.5883	16.1469	16.6795	16.7253	16.6898	16.8451	16.6509	16.3976	16.6545	16.5698	-0.153694	-0.187968	0.510719	0.126031
PMI_003551; m.25686	None; 37086	XP_022094793.1 dystrophin-like [Acanthaster planci] (id=86.39%; len=404; e=0.00E+00) ; XP_022094793.1 dystrophin-like [Acanthaster planci] (id=92.46%; len=544; e=0.00E+00)	568	3	5.06	0.684	1.10804	6	3	0	1	20.3515	20.2965	20.3282	20.3334	20.3346	20.3636	20.5247	20.482	20.1643	20.3398	20.3028	0.00807426	-0.187808	0.818385	0.060018
PMI_001372		XP_022101632.1 structural maintenance of chromosomes protein 2-like [Acanthaster planci] (id=83.82%; len=204; e=7.54E-95)			4.576	0.698	0.975717	4	3	1	1	18.3825	18.6104	18.5997	18.4213	18.429	18.9005	18.547	18.1865	18.0228	18.3291	18.7194	-0.0130624	-0.187587	0.930388	0.55079
PMI_027730		XP_022101621.1 hydroxymethylglutaryl-CoA synthase 1-like [Acanthaster planci] (id=86.00%; len=200; e=4.80E-118)			3.939	0.6735	0.769553	4	4	0	0	19.1035	19.1106	18.923	18.9949	19.097	19.3203	19.3452	19.1887	19.0418	19.1082	19.1423	-0.102097	-0.187327	0.179872	0.0398678
m.33455	Pmi_5250030_	RGN_XENLA_Regucalcin			3.672	0.7094	0.756252	1	1	1	0	13.7442	13.341	13.6121	13.5756	13.4089	13.3522	13.8313	13.5865	14.004	12.6187	13.5864	-0.0103754	-0.187001	0.967692	0.700921
m.18230; PMI_001151	Pmi_618565_H; None	HAP28_HUMAN_28_kDa_heat-_and_acid-stable_phosphoprotein; XP_022105131.1 28 kDa heat- and acid-stable phosphoprotein-like [Acanthaster planci] (id=82.07%; len=145; e=2.09E-52)	1805	11	5.608	0.808	0.746941	17	11	0	9	22.109	22.2566	21.9262	21.9118	21.867	22.2116	22.2611	22.0943	22.114	21.9642	21.9278	-0.281153	-0.18698	0.146934	0.0695811
m.22928	Pmi_640871_R	RBM4B_PIG_RNA-binding_protein_4B			5.872	0.812	0.085134	7	6	1	5	19.593	19.5283	19.3979	19.3994	19.5177	19.4852	19.6277	19.6889	19.6158	19.3228	19.3038	-0.122316	-0.186486	0.098434	0.203737
m.45956; m.45943; m.45952; PMI_001227; m.45966; m.23757; m.45973	68855; 68851; 68854; None; 68858; Pmi_641520_S; 68860	XP_022099715.1 semaphorin-1A-like isoform X16 [Acanthaster planci] (id=72.39%; len=681; e=0.00E+00) ; XP_022099713.1 semaphorin-1A-like isoform X14 [Acanthaster planci] (id=71.92%; len=577; e=0.00E+00) ; XP_022099684.1 semaphorin-1A-like isoform X2 [Acanthaster planci] (id=71.41%; len=682; e=0.00E+00) ; XP_022099711.1 semaphorin-1A-like isoform X12 [Acanthaster planci] (id=70.78%; len=575; e=0.00…	1199	3	4.162	0.7045	0.709428	3	3	0	3	19.0731	19.0952	18.8902	18.9365	18.9276	19.0755	19.321	19.1315	19.0035	18.9709	18.9944	-0.166068	-0.186387	0.00278845	0.126517
m.23484; m.23145; m.23487; m.23479	33019; Pmi_641730_2; 33022; 33015	XP_022079789.1 uncharacterized protein LOC110973357 isoform X1 [Acanthaster planci] (id=58.95%; len=268; e=8.62E-113) ; 235L_IIV6_Putative_methyltransferase_235L; XP_022079789.1 uncharacterized protein LOC110973357 isoform X1 [Acanthaster planci] (id=57.84%; len=268; e=9.24E-111) ; XP_022079789.1 uncharacterized protein LOC110973357 isoform X1 [Acanthaster planci] (id=58.58%; len=268; e=1.70E-111)	360	1	2.538	0.6974	1.85013	1	1	0	0	12.6001	12.6081	12.1358	12.606	12.6214	13.2269	12.9193	12.8884	13.0388	12.9916	12.4475	-0.149652	-0.18559	0.446829	0.45463
PMI_006088; m.26886	None; Pmi_655641_O	XP_022096878.1 uncharacterized protein LOC110982623 isoform X2 [Acanthaster planci] (id=73.21%; len=978; e=0.00E+00) ; OVOS_CHICK_Ovostatin	386	10	4.653	0.709	0.17979	12	10	0	10	21.3595	21.4611	21.2723	21.2563	21.2937	21.4498	21.547	21.62	21.3729	21.3358	21.3517	-0.136187	-0.185439	0.214925	0.0579701
m.15188	Pmi_600240_O	OPTN_DANRE_Optineurin			3.663	0.7573	0.509741	8	8	2	6	20.7906	21.1199	20.7211	20.6551	20.6138	20.9083	20.8187	20.842	20.6242	20.596	20.7931	-0.291951	-0.185244	0.318945	0.0778478
PMI_009752		XP_022092450.1 60S ribosomal protein L10-like [Acanthaster planci] (id=92.06%; len=214; e=5.54E-147)			4.437	0.7579	0.494254	27	8	8	0	23.8442	23.8287	23.7219	23.5998	23.6208	23.7158	23.787	23.896	23.7249	23.573	23.5461	-0.188924	-0.184925	0.0331937	0.0730692
PMI_025714		XP_022088633.1 probable methyltransferase TARBP1 isoform X2 [Acanthaster planci] (id=62.48%; len=717; e=0.00E+00)			3.816	0.5008	0.633371	2	2	1	1	17.7998	17.7254	17.7486	17.6266	17.5551	17.8341	17.8916	17.5409	17.0777	17.8697	17.7647	-0.119134	-0.184859	0.176692	0.548457
PMI_006878		ELT87492.1 hypothetical protein CAPTEDRAFT_198870 [Capitella teleta] (id=65.58%; len=215; e=1.65E-79)			4.38	0.6755	0.132477	16	4	0	3	24.5257	24.6645	24.4543	24.443	24.4473	24.7089	24.6726	24.7387	24.6032	24.4645	24.4985	-0.146875	-0.184671	0.280376	0.0313396
m.12704; m.14098	Pmi_581390_O; 19570	OFUT1_HUMAN_GDP-fucose_protein_O-fucosyltransferase_1; XP_022082927.1 GDP-fucose protein O-fucosyltransferase 1-like [Acanthaster planci] (id=70.68%; len=440; e=0.00E+00)	645	1	2.646	0.4059	1.23232	1	1	0	0	16.6863	17.4271	16.5353	17.2862	16.758	17.1238	16.7776	16.6568	16.4591	17.0033	16.5431	-0.196905	-0.184231	0.69912	0.450149
m.27418; PMI_006658; m.17859	39896; None; Pmi_616650_Q	XP_022103502.1 centrosomal protein of 162 kDa-like [Acanthaster planci] (id=90.12%; len=172; e=1.30E-95) ; XP_022103502.1 centrosomal protein of 162 kDa-like [Acanthaster planci] (id=78.36%; len=878; e=0.00E+00) ; QN1_RAT_Protein_QN1_homolog	2576	1	2.093	0.4233	2.73174	1	1	0	0	16.0433	15.8492	16.366	15.4218	15.8102	16.2839	15.969	15.4826	14.9261	15.8064	16.4515	-0.0802701	-0.183829	0.803981	0.737179
PMI_023676		XP_023014894.1 protein stunted-like isoform X2 [Leptinotarsa decemlineata] (id=57.69%; len=52; e=5.04E-15)			2.357	0.723	0.928302	10	3	3	0	23.3411	23.3548	23.2182	23.2989	23.2559	23.4406	23.5392	23.5093	23.463	23.2455	23.2317	-0.0902957	-0.18295	0.051709	0.121176
m.53138; m.53131; m.53139; m.30492; PMI_023337; m.53137; m.53133; m.53136	79244; 79239; 79245; Pmi_666950_U; None; 79243; 79240; 79242	XP_022089355.1 U3 small nucleolar RNA-associated protein 6 homolog isoform X1 [Acanthaster planci] (id=82.46%; len=211; e=3.39E-122) ; XP_022089355.1 U3 small nucleolar RNA-associated protein 6 homolog isoform X1 [Acanthaster planci] (id=80.61%; len=490; e=0.00E+00) ; XP_022089355.1 U3 small nucleolar RNA-associated protein 6 homolog isoform X1 [Acanthaster planci] (id=82.54%; len=126; e=6.75E-68…	2219	1	3.174	0.5328	1.48786	1	1	0	0	16.5622	16.3976	16.5028	16.3908	16.4657	16.5871	16.7313	16.4923	16.5776	16.4348	16.2503	-0.0267594	-0.182664	0.803187	0.201359
m.21267	Pmi_633641_M	MPRIP_MOUSE_Myosin_phosphatase_Rho-interacting_protein			3.631	0.6136	1.35228	4	4	1	3	18.2637	18.368	18.298	18.0685	18.1956	18.393	18.4371	18.4176	18.2976	18.286	18.1161	-0.128482	-0.182654	0.226205	0.0833017
m.37945	57402	XP_022082467.1 group XV phospholipase A2-like [Acanthaster planci] (id=81.66%; len=278; e=5.82E-173)			4.604	0.7116	1.84075	1	1	1	0	17.3391	17.1318	17.3503	17.363	17.5594	17.2805	17.2444	17.5912	17.2004	17.2853	17.0827	0.188774	-0.18258	0.27546	0.238029
m.16534; m.6571	21838; Pmi_507420_K	XP_022107992.1 C2 domain-containing protein 5-like [Acanthaster planci] (id=84.72%; len=288; e=1.60E-163) ; K0528_MOUSE_Uncharacterized_protein_KIAA0528	2048	1	3.627	0.5134	1.69673	1	1	0	0	14.9042	15.2919	14.7132	14.7635	14.7431	15.2597	15.1774	14.7099	14.8313	14.7086	15.0596	-0.358115	-0.18253	0.314523	0.422969
PMI_021167; PMI_020176; m.13172	None; None; Pmi_585220_R	XP_022101332.1 40S ribosomal protein S25-like [Acanthaster planci] (id=92.50%; len=120; e=7.61E-62) ; XP_022101332.1 40S ribosomal protein S25-like [Acanthaster planci] (id=92.50%; len=120; e=4.36E-62) ; RS25_DANRE_40S_ribosomal_protein_S25	1709	9	5.848	0.769	0.695369	32	9	0	0	24.2024	23.9277	24.3057	24.3521	24.3662	24.3469	24.3205	24.4921	24.3369	24.1762	24.0989	0.276287	-0.182498	0.289162	0.11191
m.27322; PMI_000705; m.25103; PMI_003101	Pmi_657050_N; None; 36072; None	NELL2_XENLA_Protein_kinase_C-binding_protein_NELL2; XP_022112153.1 protein kinase C-binding protein NELL2-like isoform X1 [Acanthaster planci] (id=76.40%; len=839; e=0.00E+00) ; XP_022112154.1 protein kinase C-binding protein NELL2-like isoform X2 [Acanthaster planci] (id=80.17%; len=822; e=0.00E+00) ; XP_022112153.1 protein kinase C-binding protein NELL2-like isoform X1 [Acanthaster planci] (id=…	2558	1	3.943	0.6127	0.920671	1	1	0	0	16.5332	16.4984	16.801	16.5299	16.8569	17.3286	16.8442	16.8319	16.7455	16.9619	16.7507	0.213503	-0.182211	0.165521	0.388875
m.29222	Pmi_663000_H	HYD_DROME_E3_ubiquitin-protein_ligase_hyd			3.581	0.6489	1.31151	2	2	1	1	15.0483	15.3718	14.9895	14.9251	15.1527	15.0846	15.2282	15.1994	14.9286	15.1358	14.9016	-0.187597	-0.18208	0.438301	0.117558
m.7796	Pmi_527240_n	no_annot			2.216	0.5677	0.696453	1	1	1	0	15.3964	15.7114	15.3243	15.6373	15.4531	15.8773	15.6282	15.474	15.4967	15.4998	15.437	-0.0823603	-0.182036	0.70213	0.259595
PMI_016316		XP_011670570.1 PREDICTED: serine/threonine-protein kinase 31, partial [Strongylocentrotus purpuratus] (id=32.99%; len=785; e=4.38E-102)			4.98	0.8345	0.361099	24	19	0	0	22.5304	22.5367	22.4414	22.37	22.3677	22.5464	22.7105	22.6612	22.5634	22.4314	22.3776	-0.140501	-0.181913	0.0267212	0.0697082
m.56606	84542	XP_022104753.1 prolyl 4-hydroxylase subunit alpha-1-like isoform X2 [Acanthaster planci] (id=85.54%; len=498; e=0.00E+00)			5.478	0.7031	0.067823	8	8	0	8	20.6494	20.658	20.6012	20.5857	20.4841	20.6393	20.7613	20.7762	20.5796	20.5735	20.478	-0.0967117	-0.181911	0.117179	0.0319813
m.12553	Pmi_580181_N	NCF2_BOVIN_Neutrophil_cytosol_factor_2			3.642	0.6782	0.992146	2	2	1	0	17.4053	17.5085	17.3899	17.5185	17.6243	17.7817	17.5447	17.5678	17.381	17.4282	17.5408	0.0540244	-0.181411	0.571142	0.124618
PMI_020774; m.20018	None; Pmi_626853_F	XP_022088322.1 soma ferritin-like [Acanthaster planci] (id=89.29%; len=168; e=5.68E-110) ; FRIS_LYMST_Soma_ferritin	2434	3	3.054	0.5713	0.902912	4	3	0	1	20.0915	20.3746	19.9083	20.3019	20.1098	20.8799	20.9633	20.9196	20.7791	20.7275	20.7122	-0.12639	-0.181361	0.551474	0.00490957
m.1160	2214	XP_022099393.1 uncharacterized protein LOC110983960 isoform X2 [Acanthaster planci] (id=75.97%; len=154; e=2.57E-76)			4.396	0.7506	0.911103	3	2	1	1	18.0445	18.3501	18.1696	18.2294	18.2357	18.1844	18.2374	18.312	18.1724	18.0084	18.0107	0.0142627	-0.180768	0.940882	0.0589891
PMI_008675; m.19860; PMI_018585	None; Pmi_626794_R; None	XP_022089304.1 probable E3 ubiquitin-protein ligase MGRN1 [Acanthaster planci] (id=77.20%; len=386; e=1.11E-175) ; RN157_HUMAN_RING_finger_protein_157; XP_022089304.1 probable E3 ubiquitin-protein ligase MGRN1 [Acanthaster planci] (id=68.42%; len=247; e=3.56E-80)	233	1	3.376	0.6013	1.21617	1	1	0	0	15.7202	16.2314	15.9154	15.4189	16.052	16.1986	16.1503	15.5747	15.4582	15.6493	16.2741	-0.180392	-0.180702	0.626912	0.600965
m.17374	Pmi_614240_T	TDT_XENLA_DNA_nucleotidylexotransferase			3.69	0.6266	0.752305	4	4	0	4	17.6081	17.7641	17.5423	17.6358	17.8621	17.6172	17.7871	17.6263	17.3997	17.5642	17.5258	-0.00603273	-0.18034	0.963988	0.0727645
PMI_020024; PMI_002049		XP_018588060.1 39S ribosomal protein L33, mitochondrial [Scleropages formosus] (id=62.26%; len=53; e=1.14E-13) ; XP_018588060.1 39S ribosomal protein L33, mitochondrial [Scleropages formosus] (id=61.54%; len=65; e=3.15E-16)	1677	3	3.964	0.6361	1.39943	4	3	0	0	20.7375	20.4818	20.7924	20.4985	20.8166	20.9688	20.9824	21.1068	20.8648	20.7737	20.8785	0.0928474	-0.180304	0.622511	0.0338901
PMI_007606; m.22393; m.22383; m.22378; PMI_005893	None; 31143; 31135; 31131; None	XP_022111921.1 uncharacterized protein LOC110991085 isoform X1 [Acanthaster planci] (id=51.48%; len=1051; e=0.00E+00) ; XP_022111921.1 uncharacterized protein LOC110991085 isoform X1 [Acanthaster planci] (id=41.72%; len=453; e=1.74E-66) ; XP_022111921.1 uncharacterized protein LOC110991085 isoform X1 [Acanthaster planci] (id=41.94%; len=453; e=8.90E-67) ; XP_022111921.1 uncharacterized protein LO…	2007	1	1.942	0.3903	2.73937	1	1	0	0	14.9085	15.014	15.2662	15.1165	15.1089	15.3275	15.2863	15.4476	15.5493	14.9146	15.0567	0.202633	-0.180303	0.082114	0.449794
m.8734	13597	XP_022094348.1 zinc finger BED domain-containing protein 1-like isoform X1 [Acanthaster planci] (id=78.12%; len=617; e=0.00E+00)			3.802	0.5999	1.58911	1	1	1	0	17.2065	17.0318	16.9684	16.6512	16.9273	16.9955	17.3542	16.9534	16.5774	17.0189	17.1663	-0.270194	-0.180165	0.13824	0.459185
PMI_025649; m.4709	None; Pmi_469530_n	XP_022098547.1 lathosterol oxidase-like [Acanthaster planci] (id=84.78%; len=276; e=3.62E-171) ; no_annot	1078	1	1.644	0.4775	0.447712	1	1	0	0	16.6931	16.9748	16.7681	16.3754	16.6574	16.9642	16.9363	16.7982	16.6083	16.7626	16.7874	-0.233671	-0.18015	0.315262	0.077161
m.51765	77266	XP_022082173.1 insulin-like growth factor 2 mRNA-binding protein 3 isoform X3 [Acanthaster planci] (id=83.58%; len=408; e=0.00E+00)			7.454	0.8613	0.277162	67	17	2	0	24.9979	25.0442	24.9421	24.87	24.8559	25.0251	25.1464	25.1073	24.9967	24.8927	24.8491	-0.131711	-0.180094	0.0360472	0.0352596
PMI_028558; m.10062	None; Pmi_555340_R	XP_022096415.1 40S ribosomal protein S11-like [Acanthaster planci] (id=93.96%; len=149; e=6.82E-100) ; RS11_XENLA_40S_ribosomal_protein_S11	931	11	5.901	0.7326	0.009354	26	11	0	0	24.0788	24.252	24.0569	23.931	24.0629	24.176	24.335	24.3638	24.2748	23.9605	24.0993	-0.148509	-0.180056	0.301483	0.183212
m.26259	38216	XP_022103683.1 SNW domain-containing protein 1-like [Acanthaster planci] (id=95.15%; len=536; e=0.00E+00)			3.881	0.5352	0.707238	4	3	0	3	17.7467	18.2118	17.8119	17.9784	18.0192	18.1584	18.3237	18.3007	18.1608	18.0586	18.0236	-0.0427528	-0.179932	0.885235	0.0556984
m.7668	Pmi_525030_H	HMCS1_PONAB_Hydroxymethylglutaryl-CoA_synthase,_cytoplasmic			2.985	0.6209	0.769553	4	4	1	0	18.7378	18.791	18.6784	18.848	18.8294	19.0278	19.0668	19.0705	18.8407	18.9374	18.8476	0.0208821	-0.179809	0.752352	0.0165021
m.30969	Pmi_668151_T	TDRD1_ORYLA_Tudor_domain-containing_protein_1			5.411	0.8117	0.46669	10	9	0	7	21.2839	21.2176	21.1928	21.1343	21.2702	21.3213	21.4579	21.4173	21.0517	21.2842	21.3218	-0.0516116	-0.179608	0.391633	0.155083
PMI_002529; PMI_004391; m.2948	None; None; Pmi_405250_n	XP_022102440.1 uncharacterized protein LOC110985612 isoform X1 [Acanthaster planci] (id=76.11%; len=226; e=6.64E-114) ; XP_022102440.1 uncharacterized protein LOC110985612 isoform X1 [Acanthaster planci] (id=82.72%; len=162; e=4.94E-89) ; no_annot	174	1	1.208	0.3187	0.813574	1	1	0	0				11.2803	11.8876	11.8102	12.1312	11.7248	11.5349		11.8843		-0.179181		0.49054
m.30635; PMI_014814; PMI_012238	45726; None; None	XP_022102105.1 uncharacterized protein LOC110985406 [Acanthaster planci] (id=80.40%; len=403; e=0.00E+00) ; XP_022102105.1 uncharacterized protein LOC110985406 [Acanthaster planci] (id=79.65%; len=403; e=0.00E+00) ; XP_022102105.1 uncharacterized protein LOC110985406 [Acanthaster planci] (id=76.36%; len=423; e=0.00E+00)	599	1	3.513	0.6576	1.15709	1	1	0	0	15.117	15.0311	15.1593	15.6222	15.632	15.1158	15.4976	15.4627	14.5961	15.485	15.4574	0.397153	-0.179149	0.117631	0.615018
m.10599	15813	XP_022093773.1 uncharacterized protein LOC110980974 [Acanthaster planci] (id=64.69%; len=439; e=0.00E+00)			1.299	0.3403	2.97028	2	1	1	0	18.0732	17.9637	17.6971	17.8687	17.6944	18.0579	18.0049	17.7977	17.554	17.8789	17.8902	-0.264998	-0.179124	0.0505718	0.264267
m.15180	Pmi_600130_S	S7A6O_HUMAN_Probable_RNA_polymerase_II_nuclear_localizatio..CUT			5.791	0.7546	0.450165	9	9	3	6	20.9212	20.9503	20.7921	20.705	20.76	21.0326	20.9791	20.995	20.9191	20.8096	20.7416	-0.183417	-0.178787	0.00907214	0.0636591
m.27994; m.44128; m.44130; PMI_026352	Pmi_659161_W; 66248; 66251; None	WDR89_RAT_WD_repeat-containing_protein_89; XP_022104310.1 WD repeat-containing protein 89-like isoform X2 [Acanthaster planci] (id=87.44%; len=430; e=0.00E+00) ; XP_022104310.1 WD repeat-containing protein 89-like isoform X2 [Acanthaster planci] (id=87.67%; len=430; e=0.00E+00) ; XP_022104310.1 WD repeat-containing protein 89-like isoform X2 [Acanthaster planci] (id=86.34%; len=227; e=6.11E-140)	187	1	2.444	0.4824	0.944927	1	1	0	0	18.6628	18.7218	18.6211	18.2948	18.5248	18.62	18.6023	18.5294	17.9533	18.5942	18.6682	-0.212065	-0.178632	0.151923	0.514406
m.40418; m.29789; PMI_025634; m.40411	61003; Pmi_664780_P; None; 60993	XP_022108298.1 pseudouridylate synthase 7 homolog [Acanthaster planci] (id=79.75%; len=489; e=0.00E+00) ; PUS7_BOVIN_Pseudouridylate_synthase_7_homolog; XP_022108298.1 pseudouridylate synthase 7 homolog [Acanthaster planci] (id=51.55%; len=386; e=2.01E-97) ; XP_022108298.1 pseudouridylate synthase 7 homolog [Acanthaster planci] (id=68.02%; len=816; e=0.00E+00)	896	1	3.078	0.6979	1.05743	1	1	0	0	13.2151	13.3669	13.0985	13.1842	13.1859	13.2638	13.442	13.2498	13.3685	12.7894	13.2631	-0.134855	-0.178175	0.300445	0.427453
m.31582	Pmi_669742_T	TLL1_CHICK_Tolloid-like_protein_1			3.673	0.685	0.918197	5	4	3	0	19.6727	19.8556	19.6306	19.7566	19.8385	19.6722	20.0846	20.0265	20.0394	19.6578	19.5517	-0.0222795	-0.178144	0.858814	0.416432
m.24985	Pmi_648860_A	ATG3_DANRE_Ubiquitin-like-conjugating_enzyme_ATG3			6.357	0.7749	0.932424	9	6	1	5	20.7774	20.8278	20.6276	20.5028	20.6317	20.6861	20.8714	20.7918	20.7729	20.5363	20.5074	-0.215219	-0.177567	0.0232141	0.162319
PMI_000926; m.14663	None; Pmi_596550_T	XP_022081002.1 EKC/KEOPS complex subunit Tprkb-like [Acanthaster planci] (id=71.11%; len=180; e=1.40E-81) ; TPRKB_MOUSE_TP53RK-binding_protein	1398	2	4.346	0.6599	1.21115	2	2	0	1	20.8046	20.8222	20.7967	20.7592	20.7839	21.1672	21.0492	21.0782	20.8669	20.901	20.9941	-0.033471	-0.177532	0.0993528	0.0271671
m.15966	Pmi_605360_I	IKBE_HUMAN_NF-kappa-B_inhibitor_epsilon			3.79	0.6591	0.636158	3	3	1	2	17.3717	17.3399	17.5197	17.3845	17.443	17.5596	17.6851	17.6589	17.5606	17.2981	17.5133	0.0932278	-0.177191	0.129129	0.146346
PMI_002079		XP_022085644.1 small nuclear ribonucleoprotein Sm D3-like [Acanthaster planci] (id=96.88%; len=128; e=1.79E-86)			2.468	0.5476	0.830828	2	2	2	0	20.7902	20.4601	20.7686	20.9372	20.7769	20.9875	20.9898	20.8616	20.6313	20.6506	21.0262	0.202476	-0.176901	0.422773	0.301196
m.48967; m.18399	73154; Pmi_619650_U	XP_022085959.1 UTP--glucose-1-phosphate uridylyltransferase-like isoform X1 [Acanthaster planci] (id=91.34%; len=508; e=0.00E+00) ; UGPA_BOVIN_UTP--glucose-1-phosphate_uridylyltransferase	952	21	6.459	0.8147	0.27985	31	21	0	15	23.6158	23.6617	23.5564	23.5903	23.6727	23.8604	23.8712	23.8599	23.7591	23.6728	23.6292	-0.0323023	-0.176813	0.493088	0.0424746
PMI_009555; PMI_022966		XP_022091192.1 regulating synaptic membrane exocytosis protein 2-like isoform X5 [Acanthaster planci] (id=86.23%; len=1031; e=0.00E+00) ; XP_022091190.1 regulating synaptic membrane exocytosis protein 2-like isoform X3 [Acanthaster planci] (id=76.28%; len=274; e=1.24E-119)	1920	1	1.178	0.3599	0.567556	1	1	0	0	14.5546	15.4206	15.1849	15.3532	15.2048	15.3026	15.5795	15.3685	15.3898	15.306	15.0245	0.260029	-0.17679	0.655448	0.275554
PMI_017288		XP_022102241.1 uncharacterized protein LOC110985497 isoform X1 [Acanthaster planci] (id=73.93%; len=675; e=0.00E+00)			5.994	0.8443	0.074106	69	46	0	38	24.0428	24.0361	23.9918	23.973	24.0136	24.0424	24.2106	24.2506	24.0719	23.954	23.9474	-0.0466161	-0.176783	0.0491823	0.091309
m.35946	54140	XP_022109982.1 heterogeneous nuclear ribonucleoproteins A1 homolog isoform X1 [Acanthaster planci] (id=80.69%; len=145; e=3.87E-76)			6.97	0.8118	0.000202	35	8	5	0	24.4529	24.4117	24.3648	24.4259	24.2862	24.4227	24.5176	24.5187	24.4881	24.2101	24.2307	-0.0732736	-0.176705	0.211222	0.177815
PMI_002379; m.12445	None; Pmi_579040_Z	XP_022099503.1 LOW QUALITY PROTEIN: zinc finger CCCH domain-containing protein 4-like [Acanthaster planci] (id=71.74%; len=1359; e=0.00E+00) ; ZC3H6_MOUSE_Zinc_finger_CCCH_domain-containing_protein_6	20	1	2.85	0.5849	1.22567	1	1	0	0	17.026	17.1933	17.1783	16.8416	16.6265	17.1849	17.2286	17.0925	16.7565	17.2086	17.0112	-0.227471	-0.176542	0.30307	0.308483
m.15845; PMI_009292; PMI_006167	Pmi_604680_A; None; None	ABCB7_MOUSE_ATP-binding_cassette_sub-family_B_member_7,_mi..CUT; XP_022100448.1 ATP-binding cassette sub-family B member 7, mitochondrial-like [Acanthaster planci] (id=77.72%; len=736; e=0.00E+00) ; XP_022100448.1 ATP-binding cassette sub-family B member 7, mitochondrial-like [Acanthaster planci] (id=92.12%; len=685; e=0.00E+00)	368	1	2.172	0.3462	1.52952	1	1	0	0	16.8541	17.1582	16.9778	17.3329	17.6043	17.5821	17.3708	17.8364	17.6117	17.4214	17.2271	0.298844	-0.176358	0.298209	0.371227
m.17794	Pmi_616350_C	CSN8_DANRE_COP9_signalosome_complex_subunit_8			4.763	0.7426	1.07373	3	2	1	1	18.5711	18.7211	18.9319	18.7385	18.8202	18.9666	18.6637	18.8522	18.7025	18.7586	18.4926	0.184075	-0.176255	0.181889	0.215649
PMI_010301		XP_022098179.1 ralBP1-associated Eps domain-containing protein 1-like isoform X2 [Acanthaster planci] (id=87.90%; len=347; e=0.00E+00)			4.849	0.6034	1.02364	5	4	0	4	21.121	21.2614	21.0079	20.9566	21.009	21.1646	21.3023	21.2309	21.0742	21.0861	21.009	-0.200081	-0.176147	0.19822	0.0274195
PMI_002907; PMI_021794		XP_022084664.1 IQ calmodulin-binding motif-containing protein 1-like [Acanthaster planci] (id=93.19%; len=587; e=0.00E+00) ; XP_022084664.1 IQ calmodulin-binding motif-containing protein 1-like [Acanthaster planci] (id=71.89%; len=587; e=0.00E+00)	980	1	1.806	0.3621	1.91532	1	1	0	0	17.72	17.8594	17.4918	17.5005	17.7028	17.7335	17.8442	17.7976	17.8226	17.5648	17.4596	-0.224714	-0.176102	0.117431	0.239549
PMI_020983; m.6333; PMI_014578	None; Pmi_503220_R; None	XP_022080029.1 LOW QUALITY PROTEIN: rap guanine nucleotide exchange factor 4-like [Acanthaster planci] (id=91.00%; len=711; e=0.00E+00) ; RPGF4_HUMAN_Rap_guanine_nucleotide_exchange_factor_4; XP_022080029.1 LOW QUALITY PROTEIN: rap guanine nucleotide exchange factor 4-like [Acanthaster planci] (id=82.56%; len=963; e=0.00E+00)	23	1	1.496	0.2968	1.32159	1	1	0	0	17.868	18.2354	17.9574	18.0319	18.0745	17.979	17.9802	17.954	17.8474	17.6741	17.8641	-0.030469	-0.175885	0.895757	0.0986112
m.36974; m.36976; PMI_022787; m.24049; m.36968; PMI_004104	55738; 55741; None; Pmi_644962_E; 55731; None	XP_022097234.1 probable rRNA-processing protein EBP2 [Acanthaster planci] (id=81.71%; len=339; e=0.00E+00) ; XP_022097234.1 probable rRNA-processing protein EBP2 [Acanthaster planci] (id=82.01%; len=339; e=0.00E+00) ; XP_022097234.1 probable rRNA-processing protein EBP2 [Acanthaster planci] (id=84.72%; len=301; e=1.41E-178) ; EBP2_MOUSE_Probable_rRNA-processing_protein_EBP2; XP_022097234.1 probab…	1685	1	3.132	0.6328	1.06847	1	1	0	0			13.7175	15.1906	14.0486	15.0192	15.0307	14.0234	14.3457	14.9254	14.276		-0.17543		0.682209
PMI_021082		XP_022109971.1 protein FAM272A-like [Acanthaster planci] (id=58.36%; len=574; e=0.00E+00)			3.821	0.6861	1.10406	5	4	3	1	21.2185	21.186	21.1366	20.2599	21.073	20.9832	20.9623	20.9144	20.3032	21.0462	20.9842	-0.379164	-0.175411	0.311125	0.538226
PMI_011917		XP_022106065.1 transient-receptor-potential-like protein isoform X1 [Acanthaster planci] (id=59.64%; len=223; e=2.91E-76)			3.632	0.6066	0.395244	1	1	1	0	14.4018	14.0011	13.9838	13.6341	13.5862	13.6202	13.826	13.4801	13.1326	13.753	13.5167	-0.466771	-0.174627	0.201051	0.458184
PMI_007444; m.732	None; Pmi_145220_S	XP_022102155.1 histone-lysine N-methyltransferase SETD1A-like [Acanthaster planci] (id=67.14%; len=709; e=0.00E+00) ; SE1BA_DANRE_Histone-lysine_N-methyltransferase_SETD1B-A	2423	1	2.637	0.3087	1.64532	1	1	0	0	15.8395	15.8065	15.5956	16.0303	15.8545	16.0104	16.0984	16.1495	15.509	16.0743	16.1517	0.00380995	-0.174473	0.978767	0.481517
m.28978	Pmi_662140_A	ACTN1_CHICK_Alpha-actinin-1			7.098	0.8646	0.146543	107	47	27	20	25.58	25.6009	25.5383	25.5804	25.6236	25.701	25.8614	25.8588	25.5934	25.6264	25.6783	-0.00969615	-0.174394	0.74422	0.0630158
m.56309; PMI_010867; m.56318; m.56313	83943; None; 83949; 83946	XP_022084629.1 macrophage mannose receptor 1-like [Acanthaster planci] (id=60.56%; len=1032; e=0.00E+00) ; XP_022084627.1 macrophage mannose receptor 1-like isoform X1 [Acanthaster planci] (id=54.41%; len=726; e=0.00E+00) ; XP_022084629.1 macrophage mannose receptor 1-like [Acanthaster planci] (id=60.36%; len=1047; e=0.00E+00) ; XP_022084629.1 macrophage mannose receptor 1-like [Acanthaster planc…	882	3	3.211	0.5999	1.09633	3	3	0	3	19.3122	19.4495	19.3359	19.1733	19.1681	19.4672	19.226	19.214	18.9788	19.2156	19.1904	-0.155048	-0.17414	0.206514	0.194067
m.25037; m.30775	35889; Pmi_667740_S	XP_022093302.1 helicase SRCAP-like isoform X1 [Acanthaster planci] (id=84.73%; len=465; e=0.00E+00) ; SRCAP_HUMAN_Helicase_SRCAP	1109	1	3.139	0.6352	1.97843	1	1	0	0	16.6507	16.7757	16.6039	16.3493	16.766	17.0737	17.1059	17.0977	16.7164	17.0997	16.9403	-0.140143	-0.173664	0.384549	0.258079
m.14896	Pmi_598110_S	SNX8_HUMAN_Sorting_nexin-8			4.585	0.7656	0.602599	13	10	1	9	20.9345	20.8309	20.8693	20.9362	21.0049	21.1218	21.1208	21.1965	20.9682	20.9616	20.9895	0.0541122	-0.173283	0.487969	0.0131987
PMI_002271; m.19116	None; 25406	XP_022111462.1 iron-sulfur protein NUBPL-like isoform X1 [Acanthaster planci] (id=79.13%; len=321; e=2.83E-178) ; XP_022111462.1 iron-sulfur protein NUBPL-like isoform X1 [Acanthaster planci] (id=88.60%; len=114; e=4.97E-66)	2281	2	4.537	0.7228	1.03875	2	2	0	1	17.142	17.3126	17.3618	17.2266	17.1554	17.3953	17.2868	17.3067	17.2135	17.0635	17.1922	0.0206536	-0.173222	0.86167	0.0450083
m.13858	Pmi_590690_U	UBXN6_MOUSE_UBX_domain-containing_protein_6			5.912	0.7014	0.63983	11	7	3	4	20.4483	20.6703	20.3992	20.3363	20.3414	20.4063	20.5238	20.5369	20.5189	20.2529	20.1757	-0.200355	-0.173161	0.314479	0.232265
m.8290; m.14861	13017; Pmi_597800_S	XP_022091343.1 stromal membrane-associated protein 1-like isoform X4 [Acanthaster planci] (id=79.52%; len=210; e=3.85E-118) ; SMAP1_HUMAN_Stromal_membrane-associated_protein_1	1840	2	2.951	0.5578	0.686321	3	2	0	2	19.4862	19.4497	19.3642	19.4836	19.499	19.7077	19.6259	19.6633	19.5007	19.3722	19.6046	-0.0189932	-0.173156	0.712998	0.110876
PMI_026655		XP_022108868.1 uncharacterized protein LOC110989069 isoform X1 [Acanthaster planci] (id=71.81%; len=266; e=1.56E-125)			5.233	0.8313	0.296998	21	5	0	3	22.1212	21.9928	22.0785	21.7664	22.0036	22.0001	22.1499	22.0919	21.8199	21.9974	21.9051	-0.107526	-0.173132	0.41488	0.0633273
PMI_001081		XP_022093838.1 bifunctional D-cysteine desulfhydrase/1-aminocyclopropane-1-carboxylate deaminase, mitochondrial-like [Acanthaster planci] (id=83.64%; len=379; e=0.00E+00)			6.945	0.781	0.558351	32	16	2	14	24.1077	24.0845	24.0815	24.0477	24.0714	24.1878	24.2066	24.2858	24.1224	24.0474	23.9927	-0.0292566	-0.1726	0.175393	0.0249287
m.31284	46821	XP_022107249.1 LOW QUALITY PROTEIN: cytosolic 10-formyltetrahydrofolate dehydrogenase-like [Acanthaster planci] (id=92.51%; len=921; e=0.00E+00)			6.247	0.808	0.020895	110	39	0	39	25.3868	25.3796	25.344	25.3514	25.36	25.4777	25.5759	25.5933	25.4209	25.3626	25.3459	-0.0313699	-0.172463	0.0131504	0.0215989
m.19024	Pmi_622901_n	no_annot			3.04	0.5197	0.831054	2	2	1	1	16.3015	16.5627	16.249	16.2384	15.9941	16.4645	16.3392	16.3402	16.3488	16.2318	16.046	-0.271628	-0.172409	0.233297	0.179961
PMI_030071		NP_001171862.1 NADH dehydrogenase [ubiquinone] 1 beta subcomplex subunit 1 [Saccoglossus kowalevskii] (id=56.36%; len=55; e=7.68E-13)			3.076	0.5809	1.50554	4	4	4	0	20.3329	20.2467	20.127	20.0313	20.0073	20.2642	20.1457	20.1931	20.292	19.9704	19.8254	-0.234655	-0.171766	0.0402866	0.338457
m.1374; m.34113; PMI_018892	Pmi_308700_T; 51204; None	TM45B_DANRE_Transmembrane_protein_45B; XP_022080892.1 transmembrane protein 45B-like [Acanthaster planci] (id=78.57%; len=84; e=3.39E-37) ; XP_022080892.1 transmembrane protein 45B-like [Acanthaster planci] (id=82.88%; len=292; e=0.00E+00)	2669	1	2.495	0.6028	0.767521	1	1	0	0	16.297	16.7304	16.2157	16.3966	16.2661	16.588	16.7553	16.4902	16.3167	16.5299	16.4717	-0.220928	-0.171728	0.488295	0.164364
m.9286	Pmi_546281_n	no_annot			4.79	0.7683	1.19288	2	2	2	0	16.29	16.5218	16.5444	15.9546	16.2432	16.6993	16.6699	16.3611	16.3446	16.4168	16.4546	-0.158512	-0.171404	0.497605	0.24981
PMI_022795		XP_022084422.1 uncharacterized protein LOC110975876 [Acanthaster planci] (id=65.97%; len=1616; e=0.00E+00)			3.102	0.5661	1.41411	1	1	1	0	12.8524	13.5617	14.0964	13.8826	13.7978	13.6683	13.591	13.3639	13.215	13.3035	13.5934	0.718536	-0.170431	0.277159	0.311676
m.27065; m.18679	39356; Pmi_621020_M	XP_022084618.1 TRAF3-interacting protein 1-like isoform X4 [Acanthaster planci] (id=82.41%; len=597; e=0.00E+00) ; MIPT3_DANRE_TRAF3-interacting_protein_1	2378	6	3.387	0.6174	0.516094	7	6	0	6	18.7087	18.8127	18.7002	18.5949	18.6484	18.7805	18.8219	18.8044	18.6879	18.6187	18.5898	-0.112868	-0.170157	0.223649	0.0167787
m.49245	73688	XP_022086866.1 COMM domain-containing protein 6-like [Acanthaster planci] (id=77.11%; len=201; e=1.76E-110)			3.931	0.6393	1.31462	4	4	1	0	19.6422	19.6403	19.4975	19.496	19.7751	19.8606	19.8774	19.852	19.6595	19.6903	19.7302	-0.0517674	-0.17	0.63298	0.00790591
m.47939	71716	XP_022092845.1 GDP-fucose protein O-fucosyltransferase 1-like isoform X1 [Acanthaster planci] (id=85.54%; len=415; e=0.00E+00)			5.704	0.7875	0.249469	26	11	0	11	22.7679	22.5848	22.8373	22.8548	22.8712	23.0067	22.9335	22.9847	22.8207	22.7726	22.8224	0.17811	-0.169714	0.2994	0.00423322
m.13996; m.25072	Pmi_591700_S; 35972	SDS3_BOVIN_Sin3_histone_deacetylase_corepressor_complex_co..CUT; XP_022085823.1 sin3 histone deacetylase corepressor complex component SDS3-like isoform X1 [Acanthaster planci] (id=87.23%; len=368; e=0.00E+00)	1285	1	2.673	0.5866	1.67723	1	1	0	0	17.9668	18.0815	17.8083	17.0804	17.5518	17.9157	17.7715	17.6649	17.1318	17.5942	18.1174	-0.544028	-0.169594	0.117427	0.616169
PMI_015217; m.9422; m.11523; PMI_007287	None; 14472; Pmi_571231_M; None	XP_022092949.1 uncharacterized protein LOC110980503 [Acanthaster planci] (id=85.18%; len=479; e=0.00E+00) ; XP_022092949.1 uncharacterized protein LOC110980503 [Acanthaster planci] (id=90.75%; len=173; e=5.28E-100) ; MHCKA_DICDI_Myosin_heavy_chain_kinase_A; XP_022092949.1 uncharacterized protein LOC110980503 [Acanthaster planci] (id=89.83%; len=295; e=1.45E-180)	2408	1	3.165	0.5068	1.11656	1	1	0	0	16.4014	16.4851	16.7404	16.5822	16.8008	16.8947	16.8415	16.6015	16.0725	16.7618	16.9951	0.264588	-0.169457	0.0424393	0.610391
PMI_010046		XP_022111818.1 nucleolar protein 58-like [Acanthaster planci] (id=90.86%; len=503; e=0.00E+00)			5.535	0.7593	0.662254	9	9	0	9	19.8386	19.9557	19.6813	19.7759	19.7899	20.007	20.0955	20.1279	19.873	19.9039	19.9453	-0.148085	-0.169383	0.182723	0.0237463
PMI_004394		XP_022101083.1 set1/Ash2 histone methyltransferase complex subunit ASH2-like isoform X1 [Acanthaster planci] (id=90.03%; len=632; e=0.00E+00)			3.948	0.6188	0.68224	5	5	1	0	18.9516	19.0292	18.9008	18.8337	19.0057	19.119	19.1111	19.2737	19.1235	19.0628	18.8107	-0.0770028	-0.168933	0.311529	0.216958
m.29297	Pmi_663180_D	DPOE1_HUMAN_DNA_polymerase_epsilon_catalytic_subunit_A			4.001	0.7473	0.56761	7	6	1	5	19.2017	19.0722	19.1743	18.819	19.0423	19.1615	19.1574	19.0168	18.7696	19.0439	19.0168	-0.12508	-0.168443	0.382336	0.185914
PMI_003417		XP_022105584.1 fumarylacetoacetase-like [Acanthaster planci] (id=89.71%; len=350; e=0.00E+00)			5.271	0.7832	0.0496	30	11	0	11	23.559	23.4928	23.5158	23.52	23.495	23.699	23.6874	23.7313	23.6804	23.4797	23.4531	-0.0156605	-0.168192	0.718927	0.139584
m.52282	77950	XP_022079282.1 anoctamin-4-like isoform X2 [Acanthaster planci] (id=82.47%; len=913; e=0.00E+00)			4.985	0.6832	0.18613	7	4	0	4	20.1658	19.9105	20.057	19.9108	19.9537	20.1358	20.104	20.2163	19.9061	20.0403	20.0057	-0.0643396	-0.168035	0.703735	0.0340509
PMI_001541		XP_022098762.1 F-actin-capping protein subunit alpha-2-like [Acanthaster planci] (id=83.68%; len=288; e=0.00E+00)			6.273	0.8719	0.371938	51	15	9	6	24.7905	24.8206	24.6554	24.6113	24.6671	24.8089	24.8777	24.8871	24.8097	24.6027	24.6577	-0.160954	-0.167856	0.00673515	0.0983893
m.22428; PMI_009897	Pmi_638812_V; None	VATD_HUMAN_V-type_proton_ATPase_subunit_D; XP_022093655.1 V-type proton ATPase subunit D-like [Acanthaster planci] (id=87.07%; len=232; e=1.64E-119)	1735	9	5.702	0.7654	0.501667	17	9	0	0	21.5111	21.6567	21.5092	21.5865	21.5936	21.8107	21.8737	21.7906	21.6713	21.5994	21.7016	-0.0207937	-0.16762	0.825571	0.0140256
PMI_012830		XP_022085742.1 3-methyl-2-oxobutanoate dehydrogenase [lipoamide] kinase, mitochondrial-like [Acanthaster planci] (id=71.20%; len=316; e=5.24E-144)			4.616	0.6893	1.08717	3	3	1	0	19.0622	18.8897	19.159	19.1596	19.0781	19.0898	19.0019	19.3074	19.1121	18.9806	18.804	0.156255	-0.167459	0.301289	0.258776
PMI_015821; PMI_008508; m.17318	None; None; Pmi_613860_P	XP_022099483.1 proton-coupled folate transporter-like [Acanthaster planci] (id=77.13%; len=481; e=0.00E+00) ; XP_022099483.1 proton-coupled folate transporter-like [Acanthaster planci] (id=56.29%; len=151; e=9.87E-45) ; PCFT_DANRE_Proton-coupled_folate_transporter	2521	1	2.384	0.3716	1.52439	1	1	0	0	17.312	16.419	16.1902	16.6034	16.3055	17.4505	16.9931	17.1674	17.22	17.221	16.6689	-0.499165	-0.167057	0.456591	0.506445
PMI_023836; m.15470; m.15745	None; Pmi_602090_N; 21105	XP_022083917.1 NADH dehydrogenase [ubiquinone] iron-sulfur protein 6, mitochondrial-like [Acanthaster planci] (id=79.84%; len=124; e=5.40E-67) ; NDUS6_MOUSE_NADH_dehydrogenase_[ubiquinone]_iron-sulfur_p..CUT; XP_022083917.1 NADH dehydrogenase [ubiquinone] iron-sulfur protein 6, mitochondrial-like [Acanthaster planci] (id=79.84%; len=124; e=3.48E-67)	2436	3	4.034	0.8214	0.280634	7	3	0	1	20.6593	20.7653	20.5883	20.4007	20.6086	20.9336	20.855	21.1367	20.946	20.7852	20.6949	-0.179751	-0.166385	0.125429	0.211272
PMI_021347		XP_022083535.1 cleavage and polyadenylation specificity factor subunit 6-like isoform X2 [Acanthaster planci] (id=86.52%; len=267; e=8.93E-94)			4.212	0.6838	1.65174	3	3	0	3	17.8867	18.1332	17.91	17.8544	17.9907	18.285	18.0107	18.0975	18.0262	17.9011	17.9673	-0.0916069	-0.166211	0.590431	0.165085
m.58619	88736	XP_022099154.1 synaptotagmin-1-like isoform X2 [Acanthaster planci] (id=93.33%; len=105; e=1.27E-63)			2.192	0.4585	1.38618	1	1	1	0	16.8083	16.3397	16.6011	16.6281	16.5817	16.6864	16.7205	16.4061	16.2038	16.6419	16.4695	0.0296193	-0.165917	0.919984	0.36607
m.23527; PMI_010304; PMI_017225; m.15955	Pmi_643270_M; None; None; 21292	M3K7_BOVIN_Mitogen-activated_protein_kinase_kinase_kinase_7; XP_022098174.1 mitogen-activated protein kinase kinase kinase 7-like isoform X6 [Acanthaster planci] (id=88.50%; len=400; e=0.00E+00) ; XP_022098169.1 mitogen-activated protein kinase kinase kinase 7-like isoform X1 [Acanthaster planci] (id=84.86%; len=687; e=0.00E+00) ; XP_022098169.1 mitogen-activated protein kinase kinase kinase 7-li…	481	1	1.98	0.3268	1.48416	1	1	0	0	16.384	17.3586	16.4169	16.3531	16.2092	16.4886	16.226	16.3891	15.8206	16.5385	16.2473	-0.544931	-0.165767	0.462514	0.518587
m.22806	Pmi_640490_W	WDR18_HUMAN_WD_repeat-containing_protein_18			4.432	0.7737	0.521686	8	6	1	5	20.5239	20.7048	20.4345	20.378	20.2761	20.6721	20.6745	20.7501	20.5793	20.5632	20.4572	-0.25152	-0.165737	0.167779	0.0286931
PMI_013962		XP_022088979.1 thyroid receptor-interacting protein 11-like isoform X2 [Acanthaster planci] (id=74.79%; len=1285; e=0.00E+00)			5.511	0.7444	0.030411	6	6	0	1	18.0023	18.0607	17.8623	17.8634	17.947	18.2787	18.2516	18.2297	18.0463	18.005	18.2122	-0.140617	-0.165515	0.0504878	0.114219
m.18490	Pmi_620160_H	HDAC4_CHICK_Histone_deacetylase_4			4.586	0.705	0.93402	1	1	1	0	16.7101	16.941	16.9137	16.9408	16.9061	17.2065	17.4622	17.3283	17.1463	17.2745	17.0797	0.0946662	-0.165446	0.562202	0.155611
PMI_015214; m.21672	None; Pmi_635500_G	XP_022096530.1 G kinase-anchoring protein 1-like [Acanthaster planci] (id=72.87%; len=387; e=6.89E-179) ; GKAP1_RAT_G_kinase-anchoring_protein_1	1647	6	4.924	0.7985	0.577249	6	6	0	6	19.9522	20.0041	19.7622	19.7947	19.8709	20.0478	20.1037	20.1884	19.9156	19.9355	19.9926	-0.16887	-0.165367	0.0273373	0.0357869
PMI_018659		XP_022109998.1 uncharacterized protein LOC110989726 [Acanthaster planci] (id=84.48%; len=554; e=0.00E+00)			7.033	0.8453	0.237482	107	29	2	27	26.4417	26.4024	26.4591	26.2652	26.3967	26.503	26.5049	26.5737	26.3988	26.3504	26.3367	-0.0483968	-0.16527	0.49393	0.00592263
m.16205; PMI_023093	Pmi_606862_A; None	ARBK2_HUMAN_Beta-adrenergic_receptor_kinase_2; XP_022106066.1 beta-adrenergic receptor kinase 2-like isoform X1 [Acanthaster planci] (id=96.02%; len=502; e=0.00E+00)	1634	4	4.792	0.7193	0.805316	4	4	0	3	19.1663	19.3836	19.2666	19.0747	19.1443	19.4518	19.3354	19.2977	19.1896	19.1893	19.2103	-0.113128	-0.165218	0.475892	0.0675319
m.16134	Pmi_606450_S	SPYA_HUMAN_Serine--pyruvate_aminotransferase			4.279	0.7349	0.713584	23	9	4	0	23.3248	23.2382	23.4368	23.176	23.306	23.3135	23.2739	23.373	23.2167	23.1381	23.1099	0.0247477	-0.165201	0.794806	0.0188258
PMI_006129; m.18534	None; 24385	XP_022101743.1 probable very-long-chain enoyl-CoA reductase art-1 [Acanthaster planci] (id=85.43%; len=302; e=0.00E+00) ; XP_022101743.1 probable very-long-chain enoyl-CoA reductase art-1 [Acanthaster planci] (id=85.20%; len=304; e=0.00E+00)	1801	2	3.943	0.4885	0.109374	2	2	0	1	21.6202	21.4539	21.6653	21.712	21.7634	21.7578	21.9598	21.6502	21.545	21.5706	21.7567	0.176503	-0.165173	0.254882	0.222489
PMI_026622		XP_022095032.1 uncharacterized protein LOC110981619 isoform X2 [Acanthaster planci] (id=74.21%; len=349; e=2.70E-172)			5.847	0.7961	0.494873	27	12	0	0	22.4205	22.4503	22.4148	22.3751	22.3677	22.4091	22.5042	22.4976	22.1912	22.3118	22.4133	-0.0494856	-0.16484	0.110397	0.107443
PMI_016325		XP_022102243.1 uncharacterized protein LOC110985497 isoform X3 [Acanthaster planci] (id=79.12%; len=1897; e=0.00E+00)			7.53	0.797	0.173551	94	60	0	0	24.3637	24.378	24.2888	24.3141	24.3135	24.4177	24.5592	24.5706	24.3543	24.3549	24.3441	-0.0654312	-0.164707	0.0104824	0.0780579
PMI_002149		XP_022082327.1 ras-related protein Rab-2A [Acanthaster planci] (id=99.53%; len=212; e=4.62E-157)			6.143	0.7634	0.329606	34	13	13	0	24.198	24.1004	24.1696	24.1226	24.1688	24.3775	24.2933	24.3064	24.1588	24.1612	24.1633	0.00448941	-0.164624	0.942448	0.024063
m.18127; PMI_005674	23758; None	XP_022093426.1 multidrug resistance-associated protein 4-like [Acanthaster planci] (id=67.35%; len=389; e=4.91E-167) ; XP_022093415.1 multidrug resistance-associated protein 4-like isoform X1 [Acanthaster planci] (id=66.28%; len=1459; e=0.00E+00)	2227	2	3.802	0.7551	1.06536	2	2	0	0	16.9583	16.7963	16.3838	16.8743	16.8428	16.8255	16.9513	16.7932	16.5693	16.7552	16.7525	-0.176994	-0.164304	0.39811	0.107421
PMI_012446; m.26369	None; Pmi_653912_P	XP_022094476.1 core-binding factor subunit beta-like isoform X2 [Acanthaster planci] (id=83.50%; len=97; e=3.99E-49) ; PEBB_HUMAN_Core-binding_factor_subunit_beta	83	2	3.061	0.5361	1.24791	2	2	0	1	17.6103	17.801	17.5016	17.5636	17.3677	17.8563	17.6941	17.5227	17.4231	17.6423	17.5149	-0.227997	-0.164248	0.19527	0.238082
PMI_016250		XP_022080973.1 GTP-binding protein SAR1b-like [Acanthaster planci] (id=64.91%; len=57; e=1.52E-12)			3.854	0.658	0.67252	4	1	1	0	21.9005	21.8186	21.7867	21.9641	21.8659	21.9094	21.9764	21.9027	21.5905	21.7227	21.9825	0.0126648	-0.164248	0.859494	0.288139
m.55345	82372	XP_022086073.1 calpain-B-like isoform X5 [Acanthaster planci] (id=85.41%; len=692; e=0.00E+00)			6.906	0.8311	0.089829	95	39	0	37	25.5648	25.5694	25.5403	25.486	25.5501	25.6692	25.7042	25.8059	25.6287	25.5358	25.5222	-0.0416095	-0.164202	0.170611	0.0381099
PMI_021002		XP_022106419.1 mediator of RNA polymerase II transcription subunit 25-like isoform X1 [Acanthaster planci] (id=75.39%; len=256; e=8.75E-68)			5.086	0.6871	1.5694	3	2	1	1	15.4823	15.6672	15.7217	15.6595	15.3664	15.3816	15.8712	15.3129	15.0257	15.4075	15.6403	0.00775964	-0.164072	0.960323	0.548991
m.13758	Pmi_589910_N	NUDC_CHICK_Nuclear_migration_protein_nudC			6.301	0.7541	0.484031	30	18	1	17	23.6985	23.7674	23.6514	23.4682	23.4543	23.633	23.6868	23.6816	23.5623	23.4986	23.4485	-0.208298	-0.163988	0.0672222	0.0213995
m.19967	Pmi_627331_R	RL36A_RAT_60S_ribosomal_protein_L36a			3.06	0.6686	0.744283	20	6	1	5	25.0379	25.0214	24.8853	24.8451	24.7839	25.0438	25.0583	25.1199	25.0191	24.7943	24.9168	-0.191519	-0.163895	0.0173746	0.115089
PMI_027996		XP_022105877.1 endophilin-A1-like isoform X4 [Acanthaster planci] (id=86.91%; len=84; e=8.60E-41)			4.44	0.7322	0.883327	7	4	1	3	22.2283	22.1492	22.2136	21.9593	22.2705	22.3614	22.4258	22.3184	21.9019	22.3163	22.3957	-0.0409524	-0.163868	0.722652	0.397068
PMI_010470; m.14300; m.10744	None; 19780; Pmi_563780_C	XP_022091361.1 copper chaperone for superoxide dismutase-like [Acanthaster planci] (id=87.31%; len=260; e=1.72E-169) ; XP_022091361.1 copper chaperone for superoxide dismutase-like [Acanthaster planci] (id=87.59%; len=266; e=2.92E-174) ; CCS_HUMAN_Copper_chaperone_for_superoxide_dismutase	1289	2	3.332	0.597	0.801072	3	2	0	0	18.2193	18.6762	18.2063	18.4544	18.1703	18.4798	18.2387	18.2322	17.9148	18.3235	18.2211	-0.17075	-0.163786	0.588732	0.337227
PMI_021573		XP_022098770.1 probable protein BRICK1-B [Acanthaster planci] (id=93.83%; len=81; e=1.20E-46)			5.04	0.7581	0.925435	2	2	2	0	16.0516	16.1677	16.0129	15.6084	15.8388	15.8846	15.971	15.6405	15.4332	15.8309	15.7416	-0.289647	-0.163462	0.120917	0.355687
m.28410	Pmi_660510_F	FAF1_MOUSE_FAS-associated_factor_1			2.432	0.6418	0.486883	4	4	0	4	18.6407	18.5273	18.5084	18.5724	18.5412	18.8244	18.8156	18.7863	18.5063	18.7096	18.7205	-0.0433344	-0.163332	0.581723	0.140282
PMI_000095; PMI_000637; m.28333	None; None; 41671	XP_022092484.1 ATP synthase subunit f, mitochondrial-like isoform X2 [Acanthaster planci] (id=77.22%; len=79; e=7.85E-38) ; XP_022092484.1 ATP synthase subunit f, mitochondrial-like isoform X2 [Acanthaster planci] (id=77.22%; len=79; e=9.89E-38) ; XP_022092484.1 ATP synthase subunit f, mitochondrial-like isoform X2 [Acanthaster planci] (id=79.78%; len=89; e=8.40E-47)	1037	1	2.491	0.5195	1.31559	1	1	0	0	15.3109	16.0368	15.2272	15.7821	15.2097	16.3883	16.4709	15.8113	15.444	16.0626	16.6742	-0.267503	-0.163267	0.596249	0.716246
PMI_010396; m.14372; m.14439	None; 19835; Pmi_594640_A	XP_022111975.1 actin-related protein 6-like [Acanthaster planci] (id=96.69%; len=362; e=0.00E+00) ; XP_022111975.1 actin-related protein 6-like [Acanthaster planci] (id=95.17%; len=393; e=0.00E+00) ; ARP6_CHICK_Actin-related_protein_6	1717	2	2.602	0.4028	1.31701	2	2	0	1	18.472	18.5573	18.3096	18.0968	18.1443	18.3076	18.4965	18.3093	18.281	18.2983	18.0444	-0.331095	-0.163242	0.0235616	0.193506
PMI_020910; m.10037	None; Pmi_555350_A	XP_022081245.1 dol-P-Man:Man(7)GlcNAc(2)-PP-Dol alpha-1,6-mannosyltransferase-like [Acanthaster planci] (id=80.74%; len=296; e=3.26E-143) ; ALG12_MOUSE_Dol-P-Man_Man(7)GlcNAc(2)-PP-Dol_alpha-1,6-man..CUT	2144	1	3.3	0.6082	1.18905	1	1	0	0	15.8865	15.9705	15.4792	15.6739	15.5612	15.8884	16.1729	16.7125	16.2727	16.0001	16.0113	-0.357042	-0.16323	0.0148648	0.578727
m.19796	Pmi_626600_Z	ZFY19_HUMAN_Zinc_finger_FYVE_domain-containing_protein_19			6.44	0.8629	0.820944	8	6	0	6	19.6192	19.9794	19.6901	19.678	19.9008	19.7935	20.0576	20.0601	19.9331	19.6591	19.8307	-0.0429896	-0.162757	0.85384	0.244553
m.11271	Pmi_568810_R	RS10_LUMRU_40S_ribosomal_protein_S10			6.166	0.8142	0.135861	86	14	1	4	25.5139	25.4635	25.5035	25.3684	25.5328	25.5032	25.5268	25.5487	25.412	25.3187	25.3598	-0.0204309	-0.162726	0.743644	0.0134821
m.41794	63180	XP_022082941.1 40S ribosomal protein S10-like [Acanthaster planci] (id=86.49%; len=148; e=2.69E-89)			6.166	0.8142	0.135861	86	14	1	4	25.5144	25.4641	25.5037	25.3688	25.5329	25.5032	25.5267	25.5492	25.4121	25.3191	25.3599	-0.0207895	-0.162627	0.738999	0.0132641
m.55743; m.55737; m.31689; PMI_003395	83047; 83045; Pmi_669942_S; None	XP_022080699.1 sideroflexin-2-like [Acanthaster planci] (id=90.45%; len=335; e=0.00E+00) ; XP_022080699.1 sideroflexin-2-like [Acanthaster planci] (id=90.15%; len=335; e=0.00E+00) ; SFXN2_MOUSE_Sideroflexin-2; XP_022080699.1 sideroflexin-2-like [Acanthaster planci] (id=85.67%; len=335; e=0.00E+00)	210	2	4.447	0.7212	0.527661	2	2	0	0	16.747	16.9318	16.5854	17.1212	17.0821	17.1066	17.132	17.2648	17.2788	16.8618	16.875	0.09018	-0.162569	0.677807	0.359159
m.23516; m.8738	33048; Pmi_539340_S	XP_022104457.1 synaptotagmin-like protein 4 isoform X8 [Acanthaster planci] (id=76.54%; len=243; e=1.63E-127) ; SYTL4_RAT_Synaptotagmin-like_protein_4	1220	2	3.999	0.7279	1.13109	2	2	0	0	16.3274	16.5269	16.2947	16.0962	16.2765	16.4582	16.4298	16.1557	15.8094	16.2752	16.4715	-0.20471	-0.162505	0.237384	0.512912
m.43963	66020	66020|g.43963 type:complete len:118 gc:universal 66020:824-471(-)			1.096	0.2591	1.26136	1	1	1	0	16.2651	15.8312	16.4338	16.4767	16.5135	16.1721	16.2307	16.864	16.4766	16.3766	15.9265	0.426493	-0.162412	0.296738	0.59342
m.30412	Pmi_666630_S	STK31_MOUSE_Serine/threonine-protein_kinase_31			5.553	0.8345	0.361099	33	26	0	9	22.7416	22.7711	22.6699	22.6336	22.6317	22.7736	22.9366	22.9135	22.8359	22.6621	22.6393	-0.11127	-0.162162	0.0200366	0.116202
m.25533; m.26555	36794; Pmi_654530_T	XP_022088979.1 thyroid receptor-interacting protein 11-like isoform X2 [Acanthaster planci] (id=76.19%; len=1449; e=0.00E+00) ; TRIPB_HUMAN_Thyroid_receptor-interacting_protein_11	1861	6	4.843	0.7444	0.030411	6	6	0	0	18.0212	18.046	17.8827	17.8763	17.989	18.2571	18.2675	18.2086	18.0325	18.0411	18.1752	-0.117623	-0.161486	0.073124	0.0578196
m.30469; PMI_009686; m.6659	45414; None; Pmi_508862_K	XP_022084360.1 uncharacterized protein LOC110975835 isoform X2 [Acanthaster planci] (id=73.11%; len=119; e=6.55E-44) ; XP_022084360.1 uncharacterized protein LOC110975835 isoform X2 [Acanthaster planci] (id=76.10%; len=159; e=1.32E-77) ; KIRR2_MOUSE_Kin_of_IRRE-like_protein_2	223	1	2.071	0.3452	0.433328	1	1	0	0	15.9286	15.945	15.9487	16.1114	16.0182	16.4563	16.3952	16.5331	16.0491	16.3098	16.5416	0.0892703	-0.16142	0.195991	0.375203
m.2562; m.5951	4628; Pmi_495710_M	XP_022093658.1 mitochondrial dynamics protein MID49-like [Acanthaster planci] (id=66.46%; len=161; e=1.74E-63) ; MID51_HUMAN_Mitochondrial_dynamic_protein_MID51	2506	1	2.969	0.4645	0.099956	1	1	0	0	16.5214	16.162	15.925	16.3211	16.1377	16.6022	16.4603	16.1205	16.0726	16.3269	16.2993	-0.213785	-0.161368	0.429791	0.394608
PMI_027642; m.12282	None; Pmi_577801_A	XP_022093611.1 ankyrin repeat, PH and SEC7 domain containing protein secG-like [Acanthaster planci] (id=64.18%; len=134; e=2.84E-51) ; ANK2_HUMAN_Ankyrin-2	758	1	2.247	0.6898	1.19843	1	1	0	0	16.8248	16.9659	16.5746	16.663	16.6105	16.8108	16.7793	16.88	16.6131	16.5551	16.8178	-0.279279	-0.161343	0.124195	0.170254
PMI_020598		XP_022094076.1 kinesin-like protein KIF21A isoform X7 [Acanthaster planci] (id=90.67%; len=300; e=5.28E-178)			3.533	0.6644	0.88712	3	3	1	0	16.7507	16.8675	16.837	16.4013	16.5704	16.664	16.6887	16.6148	16.1807	16.6925	16.6108	-0.206167	-0.161128	0.246087	0.417213
m.27116	Pmi_656330_U	UBP40_HUMAN_Ubiquitin_carboxyl-terminal_hydrolase_40			2.789	0.607	0.412998	2	2	0	2	12.1581	12.5374	12.1575	12.5876	12.2775	12.9635	13.0404	12.646	13.0883	12.6139	12.4646	-0.00687701	-0.161047	0.978857	0.517331
PMI_019927; m.23764; m.32582	None; Pmi_644111_E; 48693	XP_022089638.1 EF-hand calcium-binding domain-containing protein 5-like isoform X4 [Acanthaster planci] (id=74.59%; len=1110; e=0.00E+00) ; EFCB5_HUMAN_EF-hand_calcium-binding_domain-containing_protein_5; XP_022089638.1 EF-hand calcium-binding domain-containing protein 5-like isoform X4 [Acanthaster planci] (id=95.07%; len=426; e=0.00E+00)	112	1	2.146	0.6631	1.25595	1	1	0	0	14.3934	14.5991	14.3133	14.3511	14.5083	14.8174	14.4949	14.5637	14.5738	14.4486	14.3706	-0.105375	-0.161019	0.483206	0.246946
PMI_013116; PMI_014464; m.9625	None; None; Pmi_550400_F	XP_022094747.1 fatty-acid amide hydrolase 2-like [Acanthaster planci] (id=83.22%; len=292; e=5.75E-174) ; XP_022094747.1 fatty-acid amide hydrolase 2-like [Acanthaster planci] (id=85.58%; len=513; e=0.00E+00) ; FAAH2_HUMAN_Fatty-acid_amide_hydrolase_2	2025	1	2.77	0.3892	1.06727	1	1	0	0	16.4963	16.6763	16.6836	16.5077	16.7078	16.9157	16.9106	16.777	16.3585	16.854	16.91	0.0466901	-0.160279	0.712537	0.459665
m.17259; PMI_005514	Pmi_613451_A; None	ADGB_HUMAN_Androglobin; XP_022081747.1 androglobin-like [Acanthaster planci] (id=83.00%; len=1735; e=0.00E+00)	602	3	4.06	0.7017	1.44724	3	3	0	1	16.2727	16.1763	16.3032	16.1588	16.5528	16.6771	16.316	16.1922	16.3188	16.1515	16.2345	0.113799	-0.160156	0.438159	0.388566
PMI_024001		XP_022079243.1 uncharacterized protein LOC110973078 isoform X2 [Acanthaster planci] (id=44.92%; len=1340; e=0.00E+00)			3.389	0.7117	1.94693	1	1	1	0	14.0767	14.2169	13.8873	14.0383	13.4059	14.0109	14.1867	14.4303	14.1966	13.3375	14.6135	-0.369619	-0.160083	0.185079	0.718322
PMI_020836		sp|Q9U0E6.1|PROF_SUBDO RecName: Full=Profilin (id=83.57%; len=140; e=1.04E-81)			7.377	0.7769	0.151436	75	13	13	0	26.3115	25.994	26.3344	26.1596	26.1956	26.2174	26.3068	26.296	26.2342	26.0781	26.0281	0.0770467	-0.159943	0.713512	0.107164
m.27707; m.21944	40430; Pmi_636650_n	XP_022090064.1 uncharacterized protein LOC110978974 [Acanthaster planci] (id=76.34%; len=579; e=0.00E+00) ; no_annot	935	2	4.638	0.7384	1.04089	2	2	0	1	16.7263	16.7911	16.3749	16.7206	16.4747	16.901	16.7422	16.513	16.445	16.7929	16.4386	-0.235297	-0.159907	0.140333	0.380638
PMI_016713; PMI_026590; m.17283	None; None; Pmi_613590_R	XP_022088599.1 28S ribosomal protein S5, mitochondrial-like [Acanthaster planci] (id=78.11%; len=233; e=1.35E-125) ; XP_022088599.1 28S ribosomal protein S5, mitochondrial-like [Acanthaster planci] (id=70.40%; len=402; e=0.00E+00) ; RT05_BOVIN_28S_ribosomal_protein_S5,_mitochondrial	2487	3	3.416	0.7157	0.386579	4	3	0	0	19.4953	19.308	19.4491	19.2985	19.4139	19.4298	19.3008	19.4406	19.0898	19.2515	19.3509	-0.0144996	-0.159692	0.905736	0.161489
m.26767; m.22503; PMI_011790	Pmi_655240_A; 31339; None	A4_PIG_Amyloid_beta_A4_protein; XP_022098539.1 amyloid beta A4 protein-like [Acanthaster planci] (id=76.40%; len=394; e=0.00E+00) ; XP_022098539.1 amyloid beta A4 protein-like [Acanthaster planci] (id=77.80%; len=482; e=0.00E+00)	1559	1	1.479	0.3205	1.153	1	1	0	0	14.9499	15.1301	14.7169	14.7289	14.8544	15.1375	14.8807	15.1706	15.102	14.8706	14.7383	-0.273296	-0.159284	0.152671	0.320943
m.9810	Pmi_552560_P	P20D2_HUMAN_Peptidase_M20_domain-containing_protein_2			4.512	0.6176	1.27633	2	2	1	1	17.7478	17.7129	17.5312	17.3379	17.4639	17.6093	17.8939	17.9174	17.5128	17.7218	17.7088	-0.286066	-0.159108	0.028902	0.263815
PMI_020228		XP_022104780.1 hydroxyacyl-coenzyme A dehydrogenase, mitochondrial-like [Acanthaster planci] (id=84.46%; len=251; e=3.14E-145)			7.198	0.8245	0.283022	56	14	4	0	25.8435	25.7689	25.9759	25.5661	25.7425	25.6552	25.6174	25.5439	25.3698	25.5025	25.4678	-0.0447358	-0.158801	0.748735	0.0384931
m.43041	64699	XP_022093857.1 renin receptor-like [Acanthaster planci] (id=74.52%; len=361; e=0.00E+00)			4.681	0.7238	0.625336	2	2	1	1	17.0014	17.0076	16.9318	17.0528	17.1771	17.5297	17.4473	17.3596	17.3139	17.2626	17.2838	0.0493677	-0.158737	0.557969	0.0731906
PMI_015460; m.22404; PMI_004109	None; 31150; None	XP_022085277.1 28S ribosomal protein S2, mitochondrial-like [Acanthaster planci] (id=71.09%; len=256; e=3.84E-124) ; XP_022085277.1 28S ribosomal protein S2, mitochondrial-like [Acanthaster planci] (id=78.54%; len=261; e=3.05E-149) ; XP_022085277.1 28S ribosomal protein S2, mitochondrial-like [Acanthaster planci] (id=77.78%; len=261; e=1.49E-147)	1872	2	3.67	0.7107	0.66839	2	2	0	0	18.0992	17.736	18.0084	17.9749	18.1886	18.229	18.119	18.1989	17.9035	17.9437	18.2239	0.139691	-0.158609	0.579365	0.252007
m.29475; PMI_015711; PMI_002395	Pmi_663781_H; None; None	HDAC8_XENTR_Histone_deacetylase_8; XP_022100459.1 histone deacetylase 8-like [Acanthaster planci] (id=83.83%; len=637; e=0.00E+00) ; XP_022100459.1 histone deacetylase 8-like [Acanthaster planci] (id=82.10%; len=637; e=0.00E+00)	585	1	3.286	0.6455	1.5939	1	1	0	0	14.8521	14.991	15.1307	14.672	14.7075	15.0446	14.5836	14.4958	14.4911	14.1965	14.9606	-0.0847961	-0.158591	0.642071	0.603515
PMI_014486		XP_022091425.1 ras-related C3 botulinum toxin substrate 1 [Acanthaster planci] (id=97.85%; len=186; e=8.06E-133)			3.328	0.6172	1.33495	3	3	2	1	18.0003	18.3095	18.0282	17.9689	18.0827	18.4099	18.3005	18.3347	18.0545	18.2257	18.2892	-0.128294	-0.158572	0.55644	0.13819
PMI_023762		XP_022109783.1 NEDD8-conjugating enzyme UBE2F-like isoform X1 [Acanthaster planci] (id=83.60%; len=189; e=7.47E-114)			4.323	0.6228	1.31895	5	5	1	4	16.6762	16.8045	16.6914	16.5816	16.8336	17.2619	16.9792	16.7823	16.7419	16.9475	16.8588	-0.0381704	-0.158423	0.721775	0.379597
m.23115; PMI_020457	Pmi_641583_N; None	NOP56_HUMAN_Nucleolar_protein_56; XP_022094350.1 nucleolar protein 56-like isoform X3 [Acanthaster planci] (id=85.81%; len=465; e=0.00E+00)	1825	9	5.654	0.7456	0.026495	13	9	0	9	20.8291	20.7157	20.733	20.7187	20.7511	20.9368	20.9853	20.9444	20.7248	20.8528	20.814	-0.0381732	-0.158337	0.622068	0.0385069
m.30957; PMI_002857; PMI_002213	Pmi_668090_B; None; None	BRE1B_RAT_E3_ubiquitin-protein_ligase_BRE1B; XP_022110510.1 ankyrin repeat domain-containing protein 27-like [Acanthaster planci] (id=79.88%; len=338; e=0.00E+00) ; XP_022110510.1 ankyrin repeat domain-containing protein 27-like [Acanthaster planci] (id=75.83%; len=480; e=0.00E+00)	1278	2	2.948	0.5383	1.13321	2	2	0	0	16.7343	16.9669	16.8871	16.9485	16.9377	17.3218	17.4046	17.0581	16.8122	17.0287	17.4705	0.0738321	-0.157696	0.639312	0.524335
m.17154	Pmi_612760_F	FABG_THEMA_3-oxoacyl-[acyl-carrier-protein]_reductase_FabG			5.233	0.8313	0.296998	27	7	3	2	23.3399	23.3102	23.2994	22.8575	23.2407	23.171	23.3052	23.2305	22.9583	23.2122	23.0632	-0.192555	-0.157682	0.298611	0.1536
m.30519	Pmi_667013_C	CAN7_MOUSE_Calpain-7			4.655	0.71	0.403622	5	5	0	5	19.739	20.0614	19.727	19.3403	19.6173	19.7894	19.7736	19.6352	19.4852	19.629	19.611	-0.338706	-0.157678	0.228269	0.0776311
m.27574	Pmi_657861_C	CBS_HUMAN_Cystathionine_beta-synthase			6.192	0.7556	0.517694	32	14	0	14	23.202	23.049	23.26	23.0147	23.1725	23.2558	23.2362	23.2626	23.1194	23.0657	23.0971	0.0235996	-0.15745	0.838813	0.00300107
PMI_028417		XP_022111969.1 uncharacterized protein LOC110991105 [Acanthaster planci] (id=74.22%; len=512; e=0.00E+00)			3.833	0.6375	0.190053	8	2	1	1	22.5423	22.5117	22.578	22.5759	22.6017	22.6574	22.6502	22.6445	22.2946	22.599	22.5862	0.0581645	-0.157439	0.105818	0.253972
m.57384	85988	XP_022108034.1 multifunctional protein ADE2-like [Acanthaster planci] (id=94.29%; len=420; e=0.00E+00)			6.207	0.7472	0.367603	89	29	25	4	26.5228	26.4979	26.548	26.4242	26.4543	26.4968	26.4874	26.5634	26.4489	26.3259	26.3005	-0.0348331	-0.157424	0.455027	0.0552752
PMI_010341; m.43057; m.43054; PMI_000306	None; 64709; 64706; None	XP_022091660.1 uncharacterized protein LOC110979851 isoform X1 [Acanthaster planci] (id=78.45%; len=789; e=0.00E+00) ; XP_022091661.1 uncharacterized protein LOC110979851 isoform X2 [Acanthaster planci] (id=86.88%; len=869; e=0.00E+00) ; XP_022091660.1 uncharacterized protein LOC110979851 isoform X1 [Acanthaster planci] (id=86.89%; len=877; e=0.00E+00) ; XP_022091662.1 uncharacterized protein LOC…	1593	1	4.207	0.6625	0.341362	1	1	0	0				10.8974	10.7908	10.7812	11.338			10.6177	11.187		-0.157259		0.731035
m.1894; PMI_010168; PMI_029286	Pmi_358340_M; None; None	MYCB2_MOUSE_Probable_E3_ubiquitin-protein_ligase_MYCBP2; XP_022091518.1 E3 ubiquitin-protein ligase MYCBP2-like [Acanthaster planci] (id=78.42%; len=519; e=0.00E+00) ; XP_022091518.1 E3 ubiquitin-protein ligase MYCBP2-like [Acanthaster planci] (id=87.12%; len=264; e=4.83E-150)	2561	1	3.729	0.7241	1.48575	1	1	0	0	15.5347	15.5652	15.2231	15.4936	15.8959	15.5847	15.6156	15.3322	15.3418	15.4452	15.2738	-0.0124135	-0.15722	0.955213	0.219555
m.15166	Pmi_600080_C	COQ9_XENTR_Ubiquinone_biosynthesis_protein_COQ9,_mitochondrial			5.477	0.6998	0.945783	6	5	0	5	20.8704	20.8601	20.7492	20.6862	20.6763	20.8246	20.8712	20.8864	20.7613	20.6567	20.6928	-0.161302	-0.157095	0.0158386	0.0180786
m.14019; m.20629; m.14018	19509; Pmi_630812_A; 19508	PIK51021.1 ankyrin 2, isoform X [Apostichopus japonicus] (id=75.37%; len=268; e=4.12E-135) ; ANK2_MOUSE_Ankyrin-2; PIK51021.1 ankyrin 2, isoform X [Apostichopus japonicus] (id=83.05%; len=236; e=1.06E-134)	1622	3	4.237	0.7404	0.771316	3	3	0	0	17.5369	17.4396	17.2923	17.7483	17.5659	17.8272	17.9802	18.1939	18.075	17.9179	17.5373	0.0472882	-0.15701	0.763862	0.465264
PMI_013453; m.10491	None; Pmi_560760_R	XP_022105925.1 GTPase HRas isoform X1 [Acanthaster planci] (id=86.67%; len=210; e=1.01E-109) ; RASN_CHICK_GTPase_NRas	671	4	3.775	0.6656	0.657619	5	4	0	0	20.2152	20.1195	19.9876	20.1444	20.0588	20.4328	20.3788	20.4609	20.2624	20.2614	20.2778	-0.10373	-0.156914	0.22858	0.0188667
PMI_003608; m.15900	None; Pmi_604950_T	XP_022095855.1 THO complex subunit 6 homolog [Acanthaster planci] (id=91.59%; len=333; e=0.00E+00) ; THOC6_RAT_THO_complex_subunit_6_homolog	2589	2	3.991	0.7202	0.76841	2	2	0	0	17.4472	17.2874	17.441	17.3833	17.2807	17.4181	17.6219	17.5579	17.3755	17.3637	17.3884	0.00100649	-0.156733	0.992466	0.119233
m.22362	Pmi_638540_F	FER_MOUSE_Tyrosine-protein_kinase_Fer			3.901	0.7316	1.05718	10	9	2	7	20.2139	20.3347	20.1767	20.0456	20.1907	20.2969	20.3839	20.2719	20.1339	20.2328	20.1159	-0.136627	-0.1567	0.205575	0.0346313
m.29914; m.10732; m.10733	Pmi_665200_T; 15974; 15975	TAF12_MOUSE_Transcription_initiation_factor_TFIID_subunit_12; XP_022081763.1 transcription initiation factor TFIID subunit 12-like [Acanthaster planci] (id=75.82%; len=91; e=2.68E-33) ; XP_022081763.1 transcription initiation factor TFIID subunit 12-like [Acanthaster planci] (id=75.82%; len=91; e=3.55E-33)	1710	1	2.563	0.3129	1.24769	1	1	0	0	15.6562	15.8645	15.8952	15.3696	15.4369	15.6301	15.8216	15.2577	15.0104	16.0651	15.1642	-0.193085	-0.156569	0.396265	0.699792
m.51356	76862	XP_022112114.1 ras-related protein Rab-21-like [Acanthaster planci] (id=93.87%; len=212; e=8.85E-143)			6.317	0.7878	0.338799	26	10	7	3	23.2621	23.2213	23.1718	23.1385	23.133	23.3951	23.2941	23.3482	23.2085	23.1654	23.1942	-0.0939467	-0.156413	0.0741214	0.0200336
m.4959; PMI_007142	Pmi_475030_A; None	ASPG1_BACSU_L-asparaginase_1; XP_022095674.1 uncharacterized protein LOC110981935 isoform X2 [Acanthaster planci] (id=74.41%; len=168; e=6.66E-87)	878	2	3.363	0.5843	1.00424	2	2	0	0	17.573	18.1593	17.3887	17.3695	17.8399	18.5522	18.4644	18.5995	18.0619	18.7489	18.3365	-0.333468	-0.156266	0.443881	0.517751
m.26372; m.16983; PMI_018936	Pmi_653950_U; 22328; None	UBP19_MOUSE_Ubiquitin_carboxyl-terminal_hydrolase_19; XP_022081402.1 ubiquitin carboxyl-terminal hydrolase 19-like [Acanthaster planci] (id=74.65%; len=426; e=0.00E+00) ; XP_022081402.1 ubiquitin carboxyl-terminal hydrolase 19-like [Acanthaster planci] (id=80.97%; len=725; e=0.00E+00)	263	2	4.091	0.7455	1.38847	2	2	0	1	17.0831	16.9615	16.6215	16.717	16.3998	16.8908	16.9622	16.9893	16.8857	16.7633	16.7245	-0.442883	-0.156262	0.0291547	0.0636611
PMI_020368		XP_022105866.1 phosphorylated adapter RNA export protein-like [Acanthaster planci] (id=58.14%; len=86; e=5.92E-15)			2.128	0.5869	1.6453	2	2	2	0	18.1904	18.4402	18.3386	18.14	18.2007	18.3318	18.3396	18.2969	18.1768	18.1462	18.1767	-0.0888879	-0.156212	0.606024	0.000945757
m.35756	53858	XP_022093105.1 atypical kinase COQ8B, mitochondrial-like [Acanthaster planci] (id=85.56%; len=471; e=0.00E+00)			5.737	0.7772	0.399402	6	5	1	4	19.3705	19.4309	19.3057	19.1684	19.3741	19.4967	19.4898	19.451	19.2466	19.3633	19.3591	-0.117909	-0.1562	0.18681	0.0417292
m.27446; m.16574	Pmi_657420_K; 21879	KARG_STIJA_Arginine_kinase; XP_022093135.1 arginine kinase-like isoform X1 [Acanthaster planci] (id=86.00%; len=400; e=0.00E+00)	1326	19	6.686	0.8597	0.575301	47	19	0	14	24.2781	24.218	24.2769	24.195	24.2787	24.2436	24.3327	24.3304	24.2123	24.0843	24.1424	0.00212479	-0.155901	0.962297	0.032253
m.18488	Pmi_620081_C	CS010_MOUSE_UPF0556_protein_C19orf10_homolog			4.545	0.6952	0.670009	10	6	6	0	21.2089	21.1553	21.1668	21.0702	21.057	21.2152	21.1256	21.2135	21.1366	20.9461	21.0039	-0.0840951	-0.15589	0.151092	0.0911517
m.15083	Pmi_599370_I	ILF2_XENTR_Interleukin_enhancer-binding_factor_2_homolog			4.676	0.7057	0.959347	5	4	2	2	18.9765	18.8294	18.8116	18.8551	18.8251	19.0748	19.0065	19.0243	18.8637	18.8756	18.9002	-0.072339	-0.155354	0.502595	0.00654135
PMI_022398		XP_022111180.1 tetratricopeptide repeat protein 25-like isoform X1 [Acanthaster planci] (id=92.41%; len=303; e=0.00E+00)			4.888	0.8005	0.674009	16	10	2	0	21.1089	21.0444	21.1491	20.9483	21.2195	21.1939	21.224	21.2107	20.9916	21.0635	21.1084	0.0290191	-0.15506	0.765232	0.0379113
m.18800	24838	XP_022096035.1 intraflagellar transport protein 122 homolog isoform X2 [Acanthaster planci] (id=93.09%; len=217; e=7.85E-143)			5.698	0.7703	1.17375	4	3	1	0	17.7616	17.8737	17.6626	17.7484	17.883	18.2511	18.1569	17.6935	17.6533	17.9493	18.0337	-0.0530088	-0.15506	0.579591	0.501794
PMI_011402; m.15399	None; Pmi_601350_R	XP_022089492.1 40S ribosomal protein S20-like [Acanthaster planci] (id=97.14%; len=105; e=4.83E-69) ; RS20_XENLA_40S_ribosomal_protein_S20	68	6	5.304	0.6791	0.412413	24	6	0	4	24.2659	24.2293	24.2827	24.1588	24.2699	24.2819	24.4156	24.3852	24.1818	24.1683	24.2685	-0.0104669	-0.15472	0.826365	0.0423286
PMI_028559; m.7875; m.7836	None; Pmi_528550_n; 12405	XP_022111897.1 polyketide synthase-nonribosomal peptide synthetase-like [Acanthaster planci] (id=73.43%; len=271; e=1.58E-149) ; no_annot; XP_022111897.1 polyketide synthase-nonribosomal peptide synthetase-like [Acanthaster planci] (id=71.43%; len=168; e=6.85E-87)	2644	1	2.388	0.513	1.03638	1	1	0	0	15.7128	15.9403	16.0166	15.9769	15.9713	15.9823	16.5683	16.037	15.9235	16.1494	16.0508	0.161705	-0.154623	0.38741	0.502449
m.32188	Pmi_671270_D	DMD_CHICK_Dystrophin			5.06	0.7283	0.451465	25	23	3	19	21.0025	21.2332	20.994	21.0163	21.0311	21.1809	21.2407	21.2443	21.0525	21.0976	21.0523	-0.104075	-0.154533	0.532045	0.00491423
m.24701	Pmi_647780_H	HERC2_HUMAN_E3_ubiquitin-protein_ligase_HERC2			5.375	0.5875	0.479234	3	3	1	1	17.5444	17.6624	17.6614	17.4087	17.7643	17.7663	17.7543	17.7527	17.3452	17.6629	17.8017	0.00804668	-0.154516	0.951306	0.371227
m.18922; PMI_002839; PMI_008850	Pmi_622450_M; None; None	MFAP1_HUMAN_Microfibrillar-associated_protein_1; XP_022095031.1 microfibrillar-associated protein 1-like [Acanthaster planci] (id=87.94%; len=481; e=0.00E+00) ; XP_022095031.1 microfibrillar-associated protein 1-like [Acanthaster planci] (id=88.36%; len=481; e=0.00E+00)	2401	2	3.21	0.5109	1.67069	2	2	0	0	19.1696	19.3134	19.1975	18.7721	18.9423	18.498	18.756	18.6596	18.7519	18.5986	18.1003	-0.270841	-0.154274	0.157254	0.524817
m.7618	Pmi_524390_M	MIB2_CHICK_E3_ubiquitin-protein_ligase_MIB2			4.194	0.7415	0.964793	3	3	2	1	19.1959	18.9677	19.0166	18.8922	19.1365	18.9178	19.048	19.0604	19.0584	18.7761	18.7292	-0.0667344	-0.154191	0.673348	0.271299
m.7285	11658	XP_022084115.1 nuclear envelope phosphatase-regulatory subunit 1-like [Acanthaster planci] (id=95.24%; len=126; e=4.40E-85)			2.805	0.6349	1.49727	1	1	1	0	17.9213	17.8494	17.9879	17.7334	17.5152	18.0391	17.9766	17.8289	17.8555	17.719	17.8089	-0.13988	-0.153736	0.41581	0.118583
PMI_016229		XP_022097185.1 cell cycle checkpoint protein RAD17-like isoform X1 [Acanthaster planci] (id=76.72%; len=554; e=0.00E+00)			1.87	0.3786	0.064747	1	1	1	0	15.1026	15.0787	15.4431	15.2337	15.5386	15.5008	15.617	15.6025	15.2249	15.3417	15.693	0.314526	-0.15353	0.0707022	0.390143
PMI_024342		XP_022105876.1 endophilin-A1-like isoform X3 [Acanthaster planci] (id=91.11%; len=45; e=2.20E-17)			3.717	0.6525	0.88507	4	3	1	2	21.8209	21.752	21.6938	21.4701	21.8635	21.9428	22.0217	21.8696	21.4361	21.9112	22.027	-0.110675	-0.153295	0.43802	0.488537
m.18608	Pmi_620693_W	WDR20_HUMAN_WD_repeat-containing_protein_20			1.799	0.3897	1.7485	1	1	1	0	18.1972	18.0918	18.2192	17.849	17.9205	18.1579	18.1674	18.325	18.2834	17.9306	17.9775	-0.148312	-0.152967	0.329272	0.305077
m.12129; PMI_022251; m.5290	Pmi_576752_N; None; 8904	NHEJ1_MOUSE_Non-homologous_end-joining_factor_1; XP_022090848.1 non-homologous end-joining factor 1-like [Acanthaster planci] (id=85.99%; len=364; e=0.00E+00) ; XP_022090848.1 non-homologous end-joining factor 1-like [Acanthaster planci] (id=90.73%; len=205; e=2.18E-139)	573	2	2.462	0.5755	0.699199	2	2	0	0	18.4037	18.8053	18.2124	18.0672	18.2474	18.3996	18.7775	18.3122	17.9254	18.3916	18.7139	-0.428807	-0.152845	0.260908	0.606734
PMI_027509; m.17463	None; Pmi_614660_T	XP_022087489.1 tetraspanin-17-like [Acanthaster planci] (id=68.72%; len=211; e=7.75E-82) ; TSN17_MOUSE_Tetraspanin-17	2164	1	4.011	0.4994	1.09526	1	1	0	0			12.7325	13.3663	13.9943	13.1027	14.0599	13.3962	12.9312	13.7127	13.4563		-0.152831		0.697609
m.6594; m.7769	10736; Pmi_526730_T	XP_022097017.1 uncharacterized protein LOC110982707 [Acanthaster planci] (id=74.72%; len=356; e=2.34E-167) ; TTC3_MOUSE_E3_ubiquitin-protein_ligase_TTC3	478	2	3.53	0.615	0.521203	2	2	0	0	17.6938	17.7946	17.5732	17.441	17.6295	17.8779	17.9266	18.0537	17.7253	17.9034	17.7711	-0.196333	-0.152807	0.0846595	0.110707
m.29056	Pmi_662360_E	EEA1_HUMAN_Early_endosome_antigen_1			4.491	0.7448	0.819184	13	12	0	12	20.1274	20.3237	20.0792	20.195	20.2118	20.3803	20.3788	20.2858	20.2097	20.1964	20.1804	-0.0635526	-0.152765	0.63439	0.0321521
PMI_024381		XP_022092139.1 importin-4-like [Acanthaster planci] (id=94.82%; len=483; e=0.00E+00)			4.851	0.4628	1.57396	2	2	1	0	16.7098	16.2365	16.4357	16.5967	16.7684	16.9017	16.8166	17.4041	17.2891	16.7686	16.6066	0.127135	-0.152701	0.688093	0.609502
m.4836	Pmi_472431_T	TXD12_HUMAN_Thioredoxin_domain-containing_protein_12			7.271	0.767	0.117244	31	8	1	7	23.5306	23.3929	23.5119	23.5398	23.5618	23.717	23.6929	23.7363	23.5736	23.581	23.5344	0.0760941	-0.152391	0.463304	0.00146332
m.13844	Pmi_590550_H	HDDC2_XENLA_HD_domain-containing_protein_2			1.697	0.5103	0.949634	2	1	1	0	15.7394	15.9036	15.6705	15.661	15.724	15.7452	15.8883	16.1113	15.8301	15.7399	15.7186	-0.136332	-0.15209	0.333816	0.287332
PMI_011980; PMI_014342		AAL05452.1 cyclin B [Patiria pectinifera] (id=98.76%; len=404; e=0.00E+00) ; AAL05452.1 cyclin B [Patiria pectinifera] (id=99.26%; len=404; e=0.00E+00)	1173	2	3.034	0.5527	1.60641	2	2	0	1	19.3891	19.4397	19.2857	19.1696	19.2979	19.4895	19.6508	19.5396	19.2468	19.4946	19.4827	-0.163331	-0.151954	0.0434616	0.196565
m.31079	Pmi_668391_H	HNRDL_CHICK_Heterogeneous_nuclear_ribonucleoprotein_D-like			4.666	0.7253	0.535878	8	7	7	0	20.2621	20.2171	20.1973	20.1571	20.1913	20.3411	20.3689	20.332	20.231	20.2468	20.1091	-0.0577055	-0.151686	0.181924	0.0654297
m.8644	Pmi_537940_M	MMAA_MOUSE_Methylmalonic_aciduria_type_A_homolog,_mitochondrial			3.557	0.6224	0.477865	3	3	0	1	18.4663	18.5563	18.656	18.6067	18.4132	18.426	18.5387	18.3253	17.9918	18.4279	18.4156	0.0473356	-0.151546	0.623704	0.409853
m.19981; m.29185	Pmi_627610_M; 43280	MFSD1_BOVIN_Major_facilitator_superfamily_domain-containin..CUT; XP_022086178.1 uncharacterized protein LOC110976849 [Acanthaster planci] (id=38.27%; len=196; e=3.95E-30)	1967	7	4.092	0.698	0.613196	12	7	0	0	21.6959	21.6989	21.7339	21.6932	21.796	21.8922	21.9539	21.7933	21.6167	21.7226	21.8458	0.043628	-0.151413	0.281765	0.143071
PMI_003319; m.44506; PMI_000533; m.44502; m.31189	None; 66833; None; 66831; Pmi_668713_D	XP_022089719.1 disks large-associated protein 5-like [Acanthaster planci] (id=61.53%; len=876; e=0.00E+00) ; XP_022089719.1 disks large-associated protein 5-like [Acanthaster planci] (id=68.17%; len=641; e=0.00E+00) ; XP_022089719.1 disks large-associated protein 5-like [Acanthaster planci] (id=59.33%; len=900; e=0.00E+00) ; XP_022089719.1 disks large-associated protein 5-like [Acanthaster planci…	2382	1	2.352	0.3435	1.57182	1	1	0	0	17.8528	18.2984	17.8403	17.7244	17.7121	17.532	17.813	17.5182	17.454	17.5013	17.4538	-0.316674	-0.151363	0.384459	0.253936
m.25534	Pmi_650961_W	WDR63_MACFA_WD_repeat-containing_protein_63			2.679	0.4505	1.40778	4	3	3	0	20.207	20.2917	20.1827	20.1569	20.0137	20.3107	20.2761	20.3585	20.3133	20.1245	20.0534	-0.131606	-0.151361	0.147764	0.182671
m.32534	48624	XP_022089822.1 E3 UFM2-protein ligase 1-like isoform X2 [Acanthaster planci] (id=88.11%; len=412; e=0.00E+00)			3.427	0.7393	0.085485	5	4	1	0	19.0523	19.1014	18.9451	18.8033	19.0462	19.2294	19.1083	19.0213	18.6657	19.1617	19.0779	-0.145335	-0.151259	0.167176	0.435412
m.50040; m.19901	74848; Pmi_627130_R	XP_022080291.1 39S ribosomal protein L1, mitochondrial-like isoform X1 [Acanthaster planci] (id=70.28%; len=360; e=0.00E+00) ; RM01_MOUSE_39S_ribosomal_protein_L1,_mitochondrial	4	4	6.772	0.7549	0.730477	7	4	0	0	20.0374	20.047	20.1012	19.9205	20.054	20.1889	19.9968	20.0998	19.9801	19.9852	19.867	-0.0169376	-0.151088	0.784266	0.0972992
PMI_019014		XP_022090200.1 trichohyalin-like isoform X3 [Acanthaster planci] (id=58.02%; len=293; e=1.31E-74)			6.173	0.7682	0.129867	6	5	3	2	17.9002	18.1598	17.6798	17.8459	17.851	18.0478	18.0432	18.1275	17.8885	17.9623	17.9147	-0.237744	-0.150996	0.286161	0.0138111
m.43660; PMI_018881; m.24007	65668; None; Pmi_644880_S	XP_022083599.1 serine/arginine-rich splicing factor 7-like isoform X2 [Acanthaster planci] (id=79.66%; len=118; e=3.08E-64) ; XP_022083599.1 serine/arginine-rich splicing factor 7-like isoform X2 [Acanthaster planci] (id=79.66%; len=118; e=3.68E-63) ; SRSF7_HUMAN_Serine/arginine-rich_splicing_factor_7	2159	4	4.616	0.6964	0.735153	5	4	0	0	19.8892	19.8743	19.6267	19.47	19.6289	19.8503	19.9798	20.0716	19.8876	19.8566	19.7046	-0.306557	-0.150964	0.0262676	0.153399
m.19059; m.19063	25342; 25344	XP_022090544.1 abscission/NoCut checkpoint regulator-like [Acanthaster planci] (id=65.12%; len=387; e=2.86E-160) ; XP_022090544.1 abscission/NoCut checkpoint regulator-like [Acanthaster planci] (id=65.28%; len=386; e=3.55E-160)	408	6	6.44	0.8629	0.820944	8	6	0	5	19.3539	19.8451	19.5224	19.5859	19.7516	19.534	19.8493	19.8727	19.6713	19.4764	19.6561	0.0204708	-0.150686	0.947594	0.312666
PMI_025744; PMI_026171		XP_002596157.1 hypothetical protein BRAFLDRAFT_202865 [Branchiostoma floridae] (id=72.06%; len=68; e=5.62E-26) ; XP_028461494.1 general transcription factor IIH subunit 5 [Perca flavescens] (id=65.39%; len=52; e=5.58E-14)	1424	1	2.796	0.5401	1.04275	1	1	0	0	14.6705	15.112	15.2188	15.1364	15.135	15.3086	15.4348	15.3371	14.8891	15.5298	15.2102	0.272121	-0.150497	0.431542	0.503321
m.17964	Pmi_617260_R	RPE65_AMBTI_Retinoid_isomerohydrolase			4.572	0.7205	0.683748	11	9	0	8	21.5042	21.6738	21.7501	21.8766	21.6929	21.8267	21.7359	21.6005	21.6068	21.5312	21.5737	0.184169	-0.150492	0.220359	0.138577
PMI_005684; m.18078	None; Pmi_617771_I	XP_022099423.1 intraflagellar transport protein 43 homolog A-like isoform X1 [Acanthaster planci] (id=90.23%; len=215; e=7.56E-135) ; IF43B_SALSA_Intraflagellar_transport_protein_43_homolog_B	1769	2	3.163	0.4942	0.844516	2	2	0	0	18.7398	18.4975	18.6855	18.3044	18.8758	18.6783	18.8605	18.7856	18.3144	18.697	18.8622	0.00326752	-0.150291	0.988403	0.45712
PMI_006337		XP_022093247.1 suppressor of tumorigenicity 14 protein homolog isoform X1 [Acanthaster planci] (id=66.32%; len=193; e=6.94E-79)			5.561	0.7504	0.1918	8	3	0	0	22.3066	22.1735	22.3428	22.0789	22.198	22.1449	22.066	22.0215	21.8278	21.9431	22.012	-0.033491	-0.14983	0.763485	0.0909717
PMI_005881		XP_022081038.1 ATP-binding cassette sub-family C member 8-like isoform X1 [Acanthaster planci] (id=83.85%; len=576; e=0.00E+00)			3.126	0.7169	1.11907	6	6	0	0	19.5642	19.385	19.4917	19.4231	19.6691	19.6724	19.5532	19.6456	19.6248	19.3447	19.4524	0.0534062	-0.14978	0.684971	0.199834
m.18257; m.48369	Pmi_618870_D; 72338	DNJ6B_XENLA_DnaJ_homolog_subfamily_B_member_6-B; XP_022087694.1 dnaJ homolog subfamily B member 6-like isoform X4 [Acanthaster planci] (id=80.64%; len=248; e=1.34E-130)	795	3	6.065	0.8023	1.29716	3	3	0	1	18.1095	18.4049	18.0705	17.9209	17.9389	18.0903	18.4119	18.1641	18.1221	18.0896	18.0054	-0.280368	-0.149716	0.287535	0.259914
PMI_010121		XP_011670570.1 PREDICTED: serine/threonine-protein kinase 31, partial [Strongylocentrotus purpuratus] (id=34.01%; len=738; e=4.37E-106)			5.553	0.8345	0.361099	28	22	0	0	22.6694	22.6879	22.5868	22.5291	22.5144	22.6267	22.7944	22.7491	22.6625	22.5547	22.5039	-0.135247	-0.149671	0.0159491	0.0946244
m.3404; m.8248	6000; Pmi_533250_P	XP_022107333.1 prostatic acid phosphatase-like isoform X1 [Acanthaster planci] (id=67.71%; len=384; e=0.00E+00) ; PPAP_BOVIN_Prostatic_acid_phosphatase	2015	3	4.043	0.5922	1.09067	4	3	0	1	18.3201	18.2286	18.0883	18.2953	18.4613	18.5654	18.5377	18.224	18.2137	18.2324	18.4326	0.00731051	-0.149485	0.954716	0.324486
m.7674; PMI_008242	Pmi_525120_K; None	K6PF_DROME_6-phosphofructokinase; XP_022091209.1 ATP-dependent 6-phosphofructokinase-like isoform X2 [Acanthaster planci] (id=68.57%; len=175; e=3.13E-65)	2838	4	6.57	0.8042	0.734529	9	4	0	1	20.0429	20.1543	20.1241	20.0909	20.1437	20.2056	20.342	20.236	20.0548	20.1051	20.1758	0.0209569	-0.149247	0.772	0.0527338
m.16364; m.16367	21668; 21669	XP_022084655.1 talin-1-like isoform X7 [Acanthaster planci] (id=95.71%; len=420; e=0.00E+00) ; XP_022084650.1 talin-1-like isoform X2 [Acanthaster planci] (id=97.15%; len=421; e=0.00E+00)	2876	11	5.537	0.7435	0.492379	22	11	0	3	23.4569	23.3521	23.5261	23.3446	23.4232	23.4905	23.5976	23.3786	23.0542	23.3765	23.5882	0.0267539	-0.149243	0.745068	0.446817
PMI_004497		XP_022086197.1 CCR4-NOT transcription complex subunit 7-like [Acanthaster planci] (id=95.42%; len=284; e=0.00E+00)			4.591	0.6404	1.68851	1	1	1	0	15.5561	15.7562	15.3695	15.3684	15.7675	15.7583	15.5931	15.5157	15.1928	15.7023	15.5246	-0.154386	-0.149149	0.422031	0.436711
PMI_016023; m.28095; m.31058	None; Pmi_659540_P; 46408	XP_022090305.1 pleckstrin homology domain-containing family M member 2-like [Acanthaster planci] (id=71.98%; len=860; e=0.00E+00) ; PKHM2_HUMAN_Pleckstrin_homology_domain-containing_family_M..CUT; XP_022090305.1 pleckstrin homology domain-containing family M member 2-like [Acanthaster planci] (id=78.04%; len=1125; e=0.00E+00)	1652	2	2.72	0.5162	2.4374	2	2	0	0	17.0164	17.8044	17.1001	17.6709	16.9972	17.7851	17.3698	16.9597	16.6985	17.3454	17.6237	-0.154321	-0.149	0.769902	0.702991
m.19619	Pmi_625710_R	RG190_DROME_Rho_GTPase-activating_protein_190			4.438	0.6306	0.795081	7	7	0	6	20.6219	20.7363	20.6724	20.7282	20.6721	20.8374	20.9542	20.8271	20.6153	20.7037	20.8536	0.0117881	-0.148708	0.872284	0.155793
m.30759	45856	XP_022104171.1 translocon-associated protein subunit gamma-like [Acanthaster planci] (id=95.63%; len=183; e=8.09E-113)			4.32	0.748	1.01246	11	5	0	5	23.1931	23.099	23.0698	22.9356	23.041	23.0447	23.0844	23.1319	22.9923	22.9163	22.907	-0.130572	-0.148479	0.149582	0.0160332
m.49503	74046	XP_011670570.1 PREDICTED: serine/threonine-protein kinase 31, partial [Strongylocentrotus purpuratus] (id=33.60%; len=741; e=2.06E-107)			5.553	0.8345	0.361099	22	18	0	0	22.1927	22.2114	22.0806	22.089	22.0861	22.1755	22.3631	22.3245	22.2559	22.0879	22.0743	-0.116851	-0.148349	0.038128	0.143796
PMI_014086; PMI_009068; m.48932; m.23239	None; None; 73111; Pmi_642100_F	XP_022082692.1 formin-binding protein 4-like [Acanthaster planci] (id=78.92%; len=408; e=0.00E+00) ; XP_022082692.1 formin-binding protein 4-like [Acanthaster planci] (id=79.60%; len=603; e=0.00E+00) ; XP_022082692.1 formin-binding protein 4-like [Acanthaster planci] (id=78.65%; len=651; e=0.00E+00) ; FNBP4_HUMAN_Formin-binding_protein_4	1780	1	1.556	0.304	2.71782	1	1	0	0	16.7478	16.3212	16.7268	17.0011	16.9382	17.1691	17.1429	17.189	16.8716	17.0608	17.1238	0.354232	-0.148296	0.3202	0.186306
m.21634; m.12863	29898; Pmi_583010_I	XP_022080645.1 isocitrate dehydrogenase [NAD] subunit beta, mitochondrial-like [Acanthaster planci] (id=90.77%; len=379; e=0.00E+00) ; IDH3B_HUMAN_Isocitrate_dehydrogenase_[NAD]_subunit_beta,_..CUT	891	6	4.426	0.6374	0.650603	7	6	0	4	19.4843	19.6194	19.547	19.6584	19.6945	19.9384	19.8924	19.8566	19.6536	19.697	19.8919	0.0814296	-0.148253	0.425863	0.171781
m.16640; m.24467; PMI_010846	Pmi_609185_D; 34958; None	DYR_CHICK_Dihydrofolate_reductase; XP_022106530.1 putative bifunctional dihydrofolate reductase-thymidylate synthase [Acanthaster planci] (id=80.98%; len=163; e=1.15E-93) ; XP_022106530.1 putative bifunctional dihydrofolate reductase-thymidylate synthase [Acanthaster planci] (id=81.25%; len=160; e=3.92E-92)	1820	2	2.917	0.586	1.23282	2	2	0	0	19.5177	19.4334	19.4784	19.1665	19.1555	19.1872	19.3787	19.3692	19.1376	19.1547	19.1983	-0.208743	-0.148181	0.180062	0.13148
PMI_016205; PMI_010228		XP_022100301.1 coronin-7-like [Acanthaster planci] (id=63.88%; len=634; e=0.00E+00) ; XP_022100301.1 coronin-7-like [Acanthaster planci] (id=72.36%; len=398; e=0.00E+00)	2322	2	3.985	0.7322	1.19099	3	2	0	0	17.9325	17.8029	17.6904	17.8181	17.8822	18.0657	18.2121	18.0515	18.0337	17.9639	17.8881	-0.070766	-0.147864	0.483797	0.092467
m.34934	52679	XP_022091694.1 transcription elongation regulator 1-like isoform X1 [Acanthaster planci] (id=90.23%; len=665; e=0.00E+00)			3.548	0.5626	1.12813	3	3	0	3	18.1572	18.2783	18.0472	17.7436	17.8322	18.1868	18.2515	18.2127	18.1435	17.9837	18.0806	-0.343406	-0.14773	0.0509193	0.0704652
m.22507; PMI_010277; m.11883	Pmi_639180_Z; None; Pmi_574890_Z	ZN143_HUMAN_Zinc_finger_protein_143; XP_022107674.1 zinc finger protein 367-like [Acanthaster planci] (id=90.41%; len=292; e=0.00E+00) ; ZN367_RAT_Zinc_finger_protein_367	1952	1	1.997	0.3515	1.00751	1	1	0	0	15.9986	15.9932	16.0535	15.1964	15.8389	15.835	15.8392	15.7092	14.986	15.9094	16.0457	-0.299622	-0.147445	0.364617	0.702081
m.12702	Pmi_581430_S	SP17_PAPHA_Sperm_surface_protein_Sp17			4.974	0.7348	0.821431	5	4	2	2	20.1508	20.1553	20.1399	20.0267	20.1494	20.4183	20.156	20.1839	20.0785	20.1119	20.1258	-0.0476984	-0.147321	0.349584	0.215974
m.26538	38545	XP_022105083.1 ATP-dependent RNA helicase dbp2-like isoform X1 [Acanthaster planci] (id=59.48%; len=269; e=1.81E-27)			4.461	0.6789	1.15953	3	2	1	0	17.0905	17.2034	17.0496	16.7967	17.1234	17.141	17.1142	17.2098	16.9621	17.0666	16.9944	-0.157041	-0.147316	0.264644	0.0250093
PMI_024391; PMI_001596		XP_022087983.1 dynein assembly factor with WDR repeat domains 1-like [Acanthaster planci] (id=66.67%; len=393; e=1.61E-166) ; XP_022087983.1 dynein assembly factor with WDR repeat domains 1-like [Acanthaster planci] (id=63.91%; len=471; e=0.00E+00)	2678	6	3.909	0.6507	0.604092	9	6	0	6	22.9063	22.6295	22.9027	22.8941	22.9793	23.0542	22.9472	23.071	22.9412	22.8708	22.8191	0.157505	-0.147098	0.454279	0.0491598
m.44403; m.18563; PMI_019819	66593; Pmi_620440_R; None	XP_022087986.1 uncharacterized protein LOC110977828 [Acanthaster planci] (id=56.97%; len=1018; e=0.00E+00) ; REST_DANRE_RE1-silencing_transcription_factor; XP_022087986.1 uncharacterized protein LOC110977828 [Acanthaster planci] (id=53.06%; len=1012; e=0.00E+00)	1989	1	3.77	0.6894	1.28487	1	1	0	0	11.0439	11.4057	10.3104	11.3121	11.0631	11.3474	11.6134	11.157	11.7226	10.8665	11.0885	-0.329601	-0.146709	0.418604	0.646331
m.17012	Pmi_611740_P	PPR37_DANRE_Protein_phosphatase_1_regulatory_subunit_37			3.687	0.7673	1.01935	5	4	1	3	18.761	18.76	18.398	18.5763	18.7972	19.232	19.0006	19.0631	18.8927	18.9228	19.0402	-0.16997	-0.146678	0.278847	0.161534
m.26813	Pmi_655380_X	XIRP2_MOUSE_Xin_actin-binding_repeat-containing_protein_2			6.235	0.8145	0.222734	61	31	10	16	24.5611	24.4812	24.4447	24.484	24.4676	24.4863	24.638	24.7406	24.6409	24.4559	24.3291	-0.0556923	-0.146304	0.38368	0.281312
m.23015; m.16934; PMI_026658	32226; Pmi_611071_H; None	XP_022094042.1 oxidoreductase HTATIP2-like isoform X1 [Acanthaster planci] (id=75.67%; len=300; e=3.58E-173) ; HTAI2_HUMAN_Oxidoreductase_HTATIP2; XP_022094042.1 oxidoreductase HTATIP2-like isoform X1 [Acanthaster planci] (id=66.99%; len=309; e=1.96E-145)	480	2	3.619	0.661	1.23499	3	2	0	1	18.308	18.3448	18.1511	18.1721	18.0924	18.0401	18.5837	18.4379	18.0631	18.2782	18.282	-0.187837	-0.146144	0.00847868	0.47609
m.30601	45644	XP_022079912.1 60S ribosomal protein L27-like [Acanthaster planci] (id=96.32%; len=136; e=1.64E-90)			4.489	0.7332	0.566719	34	11	6	5	24.5472	24.5991	24.4546	24.5544	24.5029	24.6119	24.625	24.7342	24.7118	24.4183	24.4026	-0.0691627	-0.146135	0.178074	0.281487
PMI_023447; m.18237	None; 23934	XP_022104037.1 WD repeat-containing protein 82-like [Acanthaster planci] (id=98.71%; len=310; e=0.00E+00) ; XP_022104037.1 WD repeat-containing protein 82-like [Acanthaster planci] (id=99.68%; len=315; e=0.00E+00)	2666	4	3.349	0.5745	0.908211	4	4	0	3	18.4808	18.6649	18.5727	18.3861	18.5628	18.6442	18.6913	18.6821	18.5962	18.4345	18.5507	-0.0656577	-0.145396	0.615162	0.0839715
PMI_012226		XP_022100504.1 MKI67 FHA domain-interacting nucleolar phosphoprotein-like [Acanthaster planci] (id=60.65%; len=465; e=1.03E-155)			2.931	0.5602	0.420495	1	1	1	0	17.8308	17.6013	17.4778	17.5664	17.666	17.9223	18.1755	17.7986	17.7299	17.907	17.8235	-0.145942	-0.145368	0.404408	0.324644
PMI_011918; m.14273; m.13800	None; Pmi_593441_T; 19308	XP_022080574.1 short transient receptor potential channel 4-like [Acanthaster planci] (id=72.77%; len=459; e=0.00E+00) ; TRPG_DROME_Transient_receptor_potential-gamma_protein; XP_022080574.1 short transient receptor potential channel 4-like [Acanthaster planci] (id=64.88%; len=279; e=1.17E-96)	2336	2	9.173	0.6617	0.923698	2	2	0	0	18.5091	18.075	18.3931	17.8107	18.2346	18.0465	17.8948	18.4497	18.0918	18.3132	17.55	-0.145891	-0.145291	0.647285	0.634468
m.25654	Pmi_651230_R	ROA1_SCHAM_Heterogeneous_nuclear_ribonucleoprotein_A1,_A2..CUT			5.509	0.725	0.331254	27	14	1	13	23.1988	23.2856	23.1641	23.1137	23.1272	23.3154	23.4293	23.3379	23.1897	23.2189	23.2383	-0.107184	-0.145257	0.216252	0.0382947
m.23333	Pmi_642543_n	no_annot			2.883	0.589	0.779517	3	2	2	0	18.7146	18.6126	18.5718	18.3822	18.3866	18.6673	18.5899	18.5966	18.4472	18.4363	18.5376	-0.21669	-0.144222	0.0762461	0.0262342
PMI_020506		XP_022079796.1 integrin beta-1-like [Acanthaster planci] (id=55.44%; len=689; e=0.00E+00)			1.441	0.2693	0.176773	1	1	1	0	13.5641	13.7413	13.0192	13.8986	13.7548	14.2036	13.8058	13.6749	13.6526	13.5458	14.0535	-0.0951267	-0.144134	0.766684	0.551116
m.26739; m.15982	Pmi_655190_A; 21322	AP1G1_MOUSE_AP-1_complex_subunit_gamma-1; XP_022106671.1 AP-1 complex subunit gamma-1-like isoform X2 [Acanthaster planci] (id=91.42%; len=851; e=0.00E+00)	2252	19	5.174	0.7768	0.159715	27	19	0	18	23.298	23.2679	23.3378	23.2942	23.3227	23.3364	23.3837	23.344	23.2098	23.1744	23.2476	0.0352993	-0.144125	0.196687	0.00695101
m.25924	Pmi_652201_E	EI3EA_XENLA_Eukaryotic_translation_initiation_factor_3_s..CUT			8.962	0.8358	0.569422	41	14	2	4	25.1369	25.1216	25.0827	25.1164	25.0709	25.2218	25.2517	25.2541	25.0954	25.0797	25.1206	-0.0392801	-0.143954	0.089767	0.000878946
m.19568	Pmi_625491_n	no_annot			4.478	0.6534	0.363761	11	8	0	7	22.2166	22.3066	22.211	22.1284	22.1671	22.3424	22.3533	22.361	22.2829	22.1507	22.1916	-0.0927553	-0.14386	0.242775	0.0639233
PMI_000139; PMI_024257; m.38210	None; None; 57763	XP_022097951.1 N-acetylated-alpha-linked acidic dipeptidase 2-like [Acanthaster planci] (id=74.00%; len=373; e=0.00E+00) ; XP_022097951.1 N-acetylated-alpha-linked acidic dipeptidase 2-like [Acanthaster planci] (id=77.98%; len=386; e=0.00E+00) ; XP_022097951.1 N-acetylated-alpha-linked acidic dipeptidase 2-like [Acanthaster planci] (id=83.54%; len=723; e=0.00E+00)	2697	2	4.375	0.5765	0.23654	2	2	0	1	15.4516	15.4615	15.4034	15.8396	15.4028	15.9161	15.4903	15.6317	15.3824	15.6955	15.5287	0.0920407	-0.143847	0.591764	0.409222
PMI_012135		XP_022089991.1 28S ribosomal protein S31, mitochondrial-like [Acanthaster planci] (id=50.42%; len=353; e=6.06E-105)			6.389	0.733	0.242208	6	3	1	0	18.6628	18.38	18.451	18.5943	18.6063	18.7535	18.745	18.6139	18.2071	18.685	18.7895	0.0291232	-0.143641	0.872657	0.510428
PMI_000838		XP_022093266.1 F-box only protein 21-like [Acanthaster planci] (id=75.12%; len=213; e=1.50E-107)			3.693	0.7065	0.079075	14	4	0	0	22.1251	22.4803	22.0583	22.3513	22.4273	22.8171	22.735	22.7616	22.529	22.6914	22.663	-0.0237002	-0.143423	0.921452	0.085183
m.28510; PMI_013464	Pmi_660686_R; None	RL13_DANRE_60S_ribosomal_protein_L13; XP_022082174.1 60S ribosomal protein L13-like [Acanthaster planci] (id=88.78%; len=214; e=1.22E-123)	2371	17	5.911	0.7189	0.202733	74	17	0	13	25.495	25.5849	25.426	25.3251	25.3765	25.4967	25.587	25.6071	25.5144	25.3662	25.3814	-0.164052	-0.14292	0.101106	0.0758156
PMI_027778		XP_022101530.1 drebrin-like protein B [Acanthaster planci] (id=62.45%; len=245; e=1.80E-51)			4.712	0.6991	0.712913	11	5	0	0	21.0277	21.0382	20.9643	20.7995	21.0508	21.0984	21.1626	21.2159	21.0776	21.0813	20.8896	-0.0947593	-0.142809	0.327133	0.139066
m.21889; PMI_002532	Pmi_636341_D; None	DHSB_MOUSE_Succinate_dehydrogenase_[ubiquinone]_iron-sulf..CUT; XP_022090370.1 succinate dehydrogenase [ubiquinone] iron-sulfur subunit, mitochondrial-like [Acanthaster planci] (id=94.06%; len=286; e=0.00E+00)	1062	13	5.71	0.7464	0.212186	24	13	0	12	24.0064	23.9917	23.915	23.9403	23.9185	24.1631	24.1082	24.3047	24.2753	23.9663	23.906	-0.0744817	-0.142786	0.00795501	0.34804
m.5632	9363	XP_022082828.1 GDP-fucose protein O-fucosyltransferase 1-like [Acanthaster planci] (id=77.06%; len=109; e=2.46E-56)			1.377	0.2789	3.74508	1	1	1	0	17.055	16.6116	15.8209	16.7196	17.1008	17.3513	19.0274	17.5919	17.0933	19.5172	16.9326	-0.286194	-0.142515	0.562486	0.893353
m.20577	Pmi_630500_R	RABE1_HUMAN_Rab_GTPase-binding_effector_protein_1			4.351	0.6689	0.084729	18	16	1	7	20.5351	20.6884	20.4953	20.3959	20.4847	20.7227	20.6364	20.6839	20.4708	20.6003	20.5449	-0.153137	-0.142288	0.263013	0.0415548
m.30693	Pmi_667511_T	TAOK3_HUMAN_Serine/threonine-protein_kinase_TAO3			2.839	0.2902	0.61999	2	2	1	0	17.6262	17.4928	17.686	17.6361	17.6323	17.5879	17.7043	17.6456	17.4744	17.5566	17.4804	0.0919731	-0.142114	0.389216	0.0317571
PMI_014455; m.20950	None; Pmi_632270_E	XP_022085646.1 adenosine deaminase domain-containing protein 1-like isoform X2 [Acanthaster planci] (id=64.74%; len=987; e=0.00E+00) ; ELOB_RAT_Transcription_elongation_factor_B_polypeptide_2	1592	7	5.961	0.8079	0.088076	18	7	0	4	22.9254	23.0744	22.9022	22.7719	22.8223	22.8675	22.804	22.9236	22.7316	22.7914	22.6459	-0.167798	-0.142105	0.219821	0.0620919
PMI_029102		XP_022089668.1 inositol monophosphatase 3-like [Acanthaster planci] (id=85.33%; len=184; e=2.46E-110)			4.506	0.6752	0.701209	11	8	0	7	22.0515	22.2143	22.034	21.9983	22.1206	22.3421	22.3471	22.2641	22.0179	22.2076	22.3017	-0.0819622	-0.142057	0.48755	0.225236
m.27576	Pmi_657921_R	RT29_BOVIN_28S_ribosomal_protein_S29,_mitochondrial			5.377	0.7402	0.15143	4	4	0	4	19.2322	19.3797	19.2818	19.2523	19.2703	19.5309	19.5233	19.3353	19.1212	19.3763	19.4666	-0.0378252	-0.14183	0.698242	0.320044
PMI_023212; m.6511	None; Pmi_506290_N	XP_022111578.1 nicastrin-like [Acanthaster planci] (id=70.97%; len=372; e=0.00E+00) ; NICA_HUMAN_Nicastrin	134	2	4.296	0.6597	1.10645	3	2	0	0	17.5938	17.5454	17.4863	17.8159	17.6419	17.7698	17.8087	17.9087	17.5564	17.8225	17.6828	0.078419	-0.141821	0.500277	0.200625
PMI_000613		XP_022085231.1 neuropathy target esterase-like isoform X1 [Acanthaster planci] (id=82.88%; len=619; e=0.00E+00)			4.148	0.6806	1.06692	4	3	1	0	17.1354	17.2056	17.2089	17.1756	17.0014	17.3595	17.2686	17.3711	17.3705	17.1904	17.0128	-0.0418872	-0.141814	0.609425	0.301833
PMI_002469		XP_022104826.1 ryanodine receptor 2-like [Acanthaster planci] (id=84.95%; len=2578; e=0.00E+00)			4.952	0.6888	1.04417	2	2	0	2	16.5778	16.2888	16.148	16.2213	16.2723	16.2839	16.2889	16.2825	15.9173	16.38	16.1327	-0.219444	-0.141753	0.359611	0.400116
m.31203	Pmi_668830_D	DYST_HUMAN_Dystonin			7.53	0.8443	0.008805	158	106	1	0	25.1407	25.1508	25.0697	25.0722	25.0995	25.1543	25.2941	25.3178	25.1416	25.1005	25.0989	-0.0652317	-0.141739	0.0106211	0.0997698
m.21881; PMI_008177	Pmi_636390_G; None	GPN2_DANRE_GPN-loop_GTPase_2; XP_022106860.1 GPN-loop GTPase 2-like [Acanthaster planci] (id=86.14%; len=303; e=0.00E+00)	1260	3	4.106	0.7063	0.401789	4	3	0	0	18.8127	18.8045	18.8132	18.7375	18.8018	19.0829	19.0551	18.963	18.7264	18.8699	19.0796	-0.0244499	-0.141678	0.408768	0.299984
m.22846	Pmi_640590_P	PYGB_BOVIN_Glycogen_phosphorylase,_brain_form			6.726	0.8127	0.156916	51	26	2	24	24.0848	24.0608	24.1359	24.1557	24.168	24.2118	24.2866	24.3273	24.2068	24.1035	24.0909	0.0804137	-0.141489	0.0282446	0.0474964
PMI_013635		XP_022098485.1 uncharacterized protein LOC110983493 [Acanthaster planci] (id=83.10%; len=432; e=0.00E+00)			6.965	0.812	0.111493	77	17	0	16	26.0623	26.1968	26.0683	25.953	26.053	26.0137	26.1641	26.0802	25.9819	25.9609	25.8911	-0.104785	-0.141385	0.331212	0.0621501
PMI_011323		XP_022095327.1 DNA polymerase delta subunit 3-like isoform X2 [Acanthaster planci] (id=70.18%; len=493; e=0.00E+00)			5.389	0.7712	0.234388	11	7	0	6	20.6278	20.4252	20.551	20.501	20.5032	20.7286	20.7058	20.7001	20.6852	20.4674	20.5579	-0.00812151	-0.141325	0.949229	0.152282
m.30237; PMI_024798	Pmi_666112_S; None	SAFB2_HUMAN_Scaffold_attachment_factor_B2; XP_022083442.1 SAFB-like transcription modulator [Acanthaster planci] (id=76.16%; len=1074; e=0.00E+00)	1221	3	5.23	0.7795	1.31339	4	3	0	3	18.5828	18.4393	18.3918	18.5459	18.5575	18.7515	18.831	18.6435	18.5792	18.6078	18.615	-0.0126106	-0.141305	0.900279	0.11631
m.23832	Pmi_644283_C	CI085_RAT_Uncharacterized_protein_C9orf85_homolog			3.001	0.6917	0.920807	10	8	1	0	20.8615	20.8951	20.7758	20.4246	20.615	20.6598	20.7475	20.7566	20.6319	20.635	20.4737	-0.273187	-0.141094	0.111116	0.100004
m.41863; m.28266; PMI_004189	63312; Pmi_659980_I; None	XP_022108231.1 isocitrate dehydrogenase [NAD] subunit alpha, mitochondrial-like [Acanthaster planci] (id=90.08%; len=363; e=0.00E+00) ; IDH3A_DROME_Probable_isocitrate_dehydrogenase_[NAD]_subu..CUT; XP_022108231.1 isocitrate dehydrogenase [NAD] subunit alpha, mitochondrial-like [Acanthaster planci] (id=83.09%; len=272; e=1.42E-157)	69	4	4.118	0.7036	0.686234	4	4	0	0	18.5318	18.7791	18.4471	18.6495	18.6497	18.7747	18.868	18.9886	18.6972	18.7179	18.7931	-0.073318	-0.140988	0.66523	0.136449
m.46070	69105	XP_022093638.1 UDP-glucose 4-epimerase-like [Acanthaster planci] (id=81.48%; len=351; e=0.00E+00)			5.978	0.7693	0.860388	16	10	2	8	21.9257	21.7363	21.9395	21.9107	22.0275	22.0302	21.8704	21.956	21.8522	21.7911	21.7907	0.128214	-0.140883	0.387524	0.0753806
m.20909	Pmi_632020_T	TMED2_CRIGR_Transmembrane_emp24_domain-containing_protein_2			4.046	0.6828	0.38436	9	6	1	5	20.3466	20.0807	19.9982	19.9124	19.9094	20.2584	19.9852	20.2753	20.2159	19.9194	19.9611	-0.273653	-0.140858	0.27633	0.346131
m.27141; PMI_016895	39503; None	XP_022101149.1 polymerase delta-interacting protein 2-like isoform X1 [Acanthaster planci] (id=94.27%; len=349; e=0.00E+00) ; XP_022101149.1 polymerase delta-interacting protein 2-like isoform X1 [Acanthaster planci] (id=94.50%; len=291; e=0.00E+00)	266	1	3.463	0.5504	1.02852	1	1	0	0	14.0709	14.459	14.1645	14.5286	14.5906	14.6525	14.5836	14.3454	13.99	14.5784	14.5915	0.162971	-0.140563	0.561794	0.569141
m.7686	12208	XP_022087460.1 S-crystallin 4-like isoform X1 [Acanthaster planci] (id=74.15%; len=147; e=3.23E-74)			1.7	0.4253	1.92487	1	1	1	0	17.3628	18.1028	17.48	18.1469	18.2816	18.7083	18.5777	18.7452	18.7004	18.5694	18.3407	0.236726	-0.140249	0.650439	0.318784
m.10335	Pmi_558850_C	CB5D1_DANRE_Cytochrome_b5_domain-containing_protein_1			4.191	0.7144	0.4686	4	4	2	2	19.9114	19.8942	20.0696	19.7295	19.9376	19.9096	19.7699	19.8002	19.8229	19.6983	19.538	0.00947201	-0.140159	0.93263	0.228126
PMI_010102		XP_022079147.1 ankyrin-2-like isoform X2 [Acanthaster planci] (id=78.14%; len=1441; e=0.00E+00)			5.251	0.8423	0.084139	20	15	0	14	21.0567	21.107	20.9819	21.003	20.9843	21.156	21.2778	21.1886	21.0846	21.065	21.0525	-0.0920729	-0.140063	0.150334	0.0536423
PMI_009300		XP_022093638.1 UDP-glucose 4-epimerase-like [Acanthaster planci] (id=75.35%; len=288; e=3.46E-151)			5.143	0.743	0.913796	9	6	1	0	21.0315	20.9191	21.1503	21.0608	21.1703	21.2537	21.0249	21.1066	20.9225	21.0569	20.9865	0.151869	-0.139769	0.165127	0.162633
PMI_010210		XP_022108762.1 ADP/ATP translocase 3-like [Acanthaster planci] (id=90.97%; len=299; e=0.00E+00)			5.703	0.801	0.115261	104	26	1	25	26.7504	26.7237	26.5889	26.6664	26.6711	26.996	26.922	26.9789	26.9291	26.7925	26.7565	-0.0949002	-0.139579	0.0555252	0.101692
PMI_001765		XP_022083121.1 neudesin-like [Acanthaster planci] (id=65.08%; len=189; e=1.76E-76)			5.48	0.7954	0.341678	7	5	3	2	20.6488	20.7819	20.6795	20.7063	20.8411	20.8343	20.8751	21.0455	20.9839	20.6904	20.663	0.0269478	-0.139212	0.775373	0.326242
PMI_013741; PMI_002174; m.29012	None; None; Pmi_662231_D	XP_022079861.1 LOW QUALITY PROTEIN: ATP-dependent RNA helicase DHX8-like [Acanthaster planci] (id=97.34%; len=978; e=0.00E+00) ; XP_022079861.1 LOW QUALITY PROTEIN: ATP-dependent RNA helicase DHX8-like [Acanthaster planci] (id=82.80%; len=1122; e=0.00E+00) ; DHX8_HUMAN_ATP-dependent_RNA_helicase_DHX8	683	1	2.001	0.4203	2.48862	1	1	0	0	16.9226	16.7547	16.7179	16.5162	16.7948	16.9839	16.9287	16.8691	16.8211	16.8061	16.7375	-0.162334	-0.13902	0.274071	0.0323318
m.12481	Pmi_579380_A	ANX11_BOVIN_Annexin_A11			5.001	0.7522	0.170077	21	12	1	0	22.9536	22.7905	22.841	22.9098	22.9676	23.2414	23.3184	23.3031	23.1511	23.1835	23.1113	0.0340788	-0.138978	0.752438	0.0118874
PMI_005837		XP_022081524.1 putative helicase MOV-10 isoform X1 [Acanthaster planci] (id=63.85%; len=1018; e=0.00E+00)			3.53	0.4892	0.633598	3	3	1	2	18.7215	18.8173	18.7101	18.5174	18.6317	18.7744	18.6632	18.5998	18.5616	18.6374	18.422	-0.149658	-0.138804	0.138371	0.165446
m.27345; m.17602	Pmi_657161_D; 23060	DUS3L_XENLA_tRNA-dihydrouridine(47)_synthase_[NAD(P)(+)]-like; XP_022096867.1 tRNA-dihydrouridine(47) synthase [NAD(P)(+)]-like [Acanthaster planci] (id=78.29%; len=539; e=0.00E+00)	366	7	4.639	0.7346	0.080072	7	7	0	0	19.42	19.7286	19.3731	19.498	19.4581	19.768	19.8981	19.7855	19.6779	19.6009	19.757	-0.131235	-0.138598	0.548108	0.0854126
m.3824	Pmi_440041_D	DMXL2_HUMAN_DmX-like_protein_2			4.397	0.6789	0.771836	5	4	1	0	18.3004	18.5234	18.4647	18.3266	18.5814	18.8185	18.7041	18.5234	18.3801	18.6642	18.5865	0.0456715	-0.138407	0.766917	0.315384
PMI_004592		XP_022079670.1 LOW QUALITY PROTEIN: protein furry homolog-like [Acanthaster planci] (id=80.41%; len=1664; e=0.00E+00)			4.524	0.6809	1.42979	3	3	1	2	17.0204	16.7646	16.6538	16.7023	16.9268	16.929	16.7301	17.0017	16.6694	16.5661	17.0106	-0.131584	-0.13821	0.485775	0.438087
PMI_013393		XP_022102245.1 uncharacterized protein LOC110985497 isoform X4 [Acanthaster planci] (id=83.82%; len=2212; e=0.00E+00)			6.691	0.7731	0.048745	122	79	4	53	25.0154	25.0641	24.9545	24.9094	24.9466	25.0213	25.1654	25.1816	25.0142	24.9657	24.9739	-0.102935	-0.138186	0.0871968	0.10336
m.25222	Pmi_649790_Y	YM54_YEAST_Uncharacterized_protein_YMR196W			4.945	0.7551	0.835243	14	12	0	12	21.6163	21.5358	21.6144	21.5764	21.648	21.5641	21.6262	21.7945	21.6629	21.514	21.3935	0.0369246	-0.138154	0.521161	0.255586
m.21473	Pmi_634602_T	TATD_EDWTE_Tat-linked_quality_control_protein_TatD			6.965	0.812	0.111493	72	18	0	7	25.7814	25.8215	25.7493	25.6653	25.7289	25.7528	25.8382	25.8132	25.7265	25.6356	25.6277	-0.0869364	-0.138139	0.0752807	0.029285
PMI_019872		XP_022098913.1 alpha-N-acetylgalactosaminidase-like [Acanthaster planci] (id=82.00%; len=150; e=2.31E-84)			4.922	0.805	0.731733	7	6	1	0	20.9349	20.9264	20.8454	20.856	20.8955	21.0109	21.145	21.1158	20.9899	20.8688	20.9988	-0.0649989	-0.138089	0.0429208	0.0774798
m.15547; PMI_004127	Pmi_602520_P; None	PSDE_HUMAN_26S_proteasome_non-ATPase_regulatory_subunit_14; XP_022092753.1 26S proteasome non-ATPase regulatory subunit 14 [Acanthaster planci] (id=90.00%; len=340; e=0.00E+00)	351	7	7.225	0.7956	0.247775	31	7	0	0	23.4233	23.5216	23.3402	23.2368	23.3292	23.4634	23.472	23.4592	23.3775	23.3124	23.2906	-0.170355	-0.138082	0.108496	0.031675
PMI_002799; m.30435	None; Pmi_666644_C	XP_022098854.1 cilia- and flagella-associated protein 54-like [Acanthaster planci] (id=92.77%; len=2117; e=0.00E+00) ; CL055_HUMAN_Uncharacterized_protein_C12orf55	1069	1	3.418	0.5231	1.15554	1	1	0	0	15.9071	16.0759	16.0471	16.0768	16.3181	16.3132	16.1476	16.1107	15.9968	15.9918	16.1699	0.155824	-0.137676	0.295282	0.182795
m.27341	39813	XP_022083246.1 77 kDa echinoderm microtubule-associated protein-like isoform X3 [Acanthaster planci] (id=92.71%; len=384; e=0.00E+00)			3.627	0.7742	0.014741	29	9	2	7	23.1101	23.1382	23.2052	23.1141	23.1073	23.0887	23.1447	23.119	23.168	22.9185	22.8538	0.0180811	-0.137323	0.641033	0.286777
PMI_003698; m.49039; m.49044; PMI_027910; m.25606	None; 73287; 73290; None; Pmi_651140_D	XP_022103754.1 protein DGCR14-like [Acanthaster planci] (id=80.83%; len=506; e=0.00E+00) ; XP_022103754.1 protein DGCR14-like [Acanthaster planci] (id=81.42%; len=506; e=0.00E+00) ; XP_022103754.1 protein DGCR14-like [Acanthaster planci] (id=81.78%; len=428; e=0.00E+00) ; XP_022103754.1 protein DGCR14-like [Acanthaster planci] (id=83.43%; len=332; e=0.00E+00) ; DGC14_HUMAN_Protein_DGCR14	2762	1	1.372	0.379	1.24326	1	1	0	0	16.1894	16.5219	15.9393	15.7659	15.5302	15.6278	15.9194	15.9333	15.7652	15.9379	15.3659	-0.610525	-0.13714	0.0951666	0.532065
PMI_012098; m.5633; m.5891	None; 9364; Pmi_494140_O	XP_022082828.1 GDP-fucose protein O-fucosyltransferase 1-like [Acanthaster planci] (id=53.15%; len=286; e=5.42E-86) ; XP_022082828.1 GDP-fucose protein O-fucosyltransferase 1-like [Acanthaster planci] (id=62.72%; len=169; e=2.72E-68) ; OFUT1_HUMAN_GDP-fucose_protein_O-fucosyltransferase_1	1139	1	4.558	0.7547	0.671505	1	1	0	0	12.5385			11.992		12.0688				11.9317		-0.546554	-0.137069
m.21930; PMI_014279; m.11600	Pmi_636490_A; None; 16918	ASPP1_MOUSE_Apoptosis-stimulating_of_p53_protein_1; XP_022083260.1 apoptosis-stimulating of p53 protein 1-like isoform X3 [Acanthaster planci] (id=82.67%; len=1148; e=0.00E+00) ; XP_022083258.1 apoptosis-stimulating of p53 protein 1-like isoform X1 [Acanthaster planci] (id=89.03%; len=228; e=4.88E-127)	2662	1	2.315	0.5905	1.39823	1	1	0	0	14.7842	14.945	14.4821	14.5729	14.6408	15.0703	15.0355	15.1084	15.0171	14.8623	14.9249	-0.299277	-0.136609	0.105683	0.0751429
m.15874	Pmi_604760_P	PTN11_CHICK_Tyrosine-protein_phosphatase_non-receptor_type_11			3.812	0.6354	1.13196	4	4	1	3	20.0495	19.8985	20.1363	19.9665	20.0665	20.183	20.2611	20.2254	20.0561	20.0895	20.1145	0.0823752	-0.136475	0.463359	0.0101602
PMI_001863; m.1363	None; Pmi_301770_T	XP_022095510.1 TGF-beta-activated kinase 1 and MAP3K7-binding protein 1-like [Acanthaster planci] (id=86.60%; len=485; e=0.00E+00) ; TAB1_MOUSE_TGF-beta-activated_kinase_1_and_MAP3K7-binding_..CUT	2363	1	3.837	0.6599	1.07799	1	1	0	0	14.5735	15.3655	15.2104	15.6134	15.5966	15.4365	15.3625	14.9891	14.5003	15.2001	15.6785	0.503923	-0.136452	0.410526	0.73924
PMI_003687		XP_022110062.1 dual serine/threonine and tyrosine protein kinase-like isoform X2 [Acanthaster planci] (id=67.25%; len=748; e=0.00E+00)			4.012	0.5648	2.46387	1	1	1	0	17.8198	17.773	17.7627	17.8488	17.6947	17.929	17.7711	17.8523	17.5168	17.9306	17.6958	-0.0276885	-0.136396	0.622913	0.377058
PMI_020826		XP_022106240.1 death-inducer obliterator 1-like isoform X1 [Acanthaster planci] (id=75.25%; len=1394; e=0.00E+00)			2.185	0.4279	1.21534	2	2	1	1	17.5498	17.8019	17.646	17.4012	17.5888	17.9302	17.8635	17.8927	17.7655	17.7483	17.7637	-0.130503	-0.136283	0.479706	0.0141701
m.25581	Pmi_651040_N	NO66_BRAFL_Lysine-specific_demethylase_NO66			5.317	0.7793	0.758448	11	10	1	9	21.0553	20.7678	20.9935	20.9226	21.0345	21.0679	21.0888	21.1456	21.0511	20.924	20.9189	0.0719621	-0.136094	0.704662	0.0676653
PMI_004322		XP_022086734.1 rac GTPase-activating protein 1-like isoform X2 [Acanthaster planci] (id=85.90%; len=695; e=0.00E+00)			3.135	0.623	0.918583	3	3	0	3	18.1817	18.3817	18.02	17.6286	17.9685	18.163	18.2698	18.2096	18.0654	18.0723	18.0973	-0.409311	-0.1358	0.0830399	0.0381961
m.16284	21590	XP_022091396.1 uncharacterized protein LOC110979686 [Acanthaster planci] (id=86.68%; len=518; e=0.00E+00)			4.53	0.7936	1.02608	4	3	0	2	18.8468	19.0309	18.8716	18.8299	18.8958	18.9664	19.1335	19.1206	18.9036	18.9119	18.9977	-0.0730695	-0.135799	0.570635	0.110306
m.20729; m.18789	28240; Pmi_621660_A	XP_022083553.1 apoptosis inhibitor 5-like [Acanthaster planci] (id=85.20%; len=581; e=0.00E+00) ; API5_PONAB_Apoptosis_inhibitor_5	1175	2	3.346	0.57	1.42171	2	2	0	1	18.2378	18.3374	18.2964	18.2118	18.1574	18.2503	18.5302	18.5207	18.276	18.2817	18.337	-0.0657303	-0.135525	0.402679	0.275673
PMI_006221		XP_022104593.1 probable tRNA (uracil-O(2)-)-methyltransferase [Acanthaster planci] (id=69.14%; len=567; e=0.00E+00)			1.488	0.3407	0.599129	1	1	1	0	15.6644	15.8703	15.6208	15.4467	15.5289	15.816	15.675	15.7818	15.822	15.5493	15.4964	-0.235211	-0.135002	0.218175	0.314238
m.47115; m.47110; m.47119	70610; 70608; 70611	XP_022087003.1 trichohyalin-like isoform X5 [Acanthaster planci] (id=60.00%; len=295; e=8.22E-53) ; XP_022087003.1 trichohyalin-like isoform X5 [Acanthaster planci] (id=59.41%; len=303; e=1.12E-51) ; XP_022087003.1 trichohyalin-like isoform X5 [Acanthaster planci] (id=75.00%; len=140; e=3.09E-33)	258	3	4.706	0.8151	0.441199	6	3	0	1	18.0571	18.1548	18.0234	17.9247	17.9946	18.0317	18.186	18.1973	18.1249	17.9658	17.9194	-0.125029	-0.134951	0.178485	0.176775
m.11485	Pmi_570900_Q	QOR_PONAB_Quinone_oxidoreductase			4.902	0.704	1.19456	9	6	1	3	20.3235	20.3678	20.3323	20.2955	20.3692	20.5717	20.5683	20.3605	20.1978	20.3628	20.5351	-0.0133203	-0.134944	0.6983	0.32898
m.51505	76973	XP_022102247.1 plectin-like [Acanthaster planci] (id=85.59%; len=111; e=8.77E-48)			3.379	0.536	1.05793	3	2	0	1	19.4012	19.6292	19.4918	19.3413	19.3471	19.4781	19.6414	19.5989	19.1509	19.4907	19.6728	-0.121774	-0.13467	0.467015	0.476695
PMI_023414; m.36982; m.19589	None; 55762; Pmi_625620_H	XP_022082084.1 heterogeneous nuclear ribonucleoprotein Q-like [Acanthaster planci] (id=84.59%; len=519; e=0.00E+00) ; XP_022082084.1 heterogeneous nuclear ribonucleoprotein Q-like [Acanthaster planci] (id=84.39%; len=519; e=0.00E+00) ; HNRPQ_MOUSE_Heterogeneous_nuclear_ribonucleoprotein_Q	1418	25	7.345	0.7984	0.374468	35	25	0	0	23.3989	23.507	23.3412	23.4002	23.4161	23.6174	23.6893	23.6604	23.5408	23.4887	23.5338	-0.0670958	-0.134562	0.414547	0.00824975
PMI_005469; PMI_002274		XP_022111460.1 protein odr-4 homolog isoform X2 [Acanthaster planci] (id=89.97%; len=369; e=0.00E+00) ; XP_022111460.1 protein odr-4 homolog isoform X2 [Acanthaster planci] (id=91.06%; len=302; e=0.00E+00)	1333	4	5.995	0.6078	0.547014	5	4	0	2	19.4158	19.5095	19.3599	19.4277	19.4202	19.6964	19.528	19.5924	19.2814	19.4406	19.6911	-0.0600418	-0.134548	0.402061	0.382183
m.17924	23550	XP_022090967.1 glycogen phosphorylase, brain form-like isoform X2 [Acanthaster planci] (id=91.53%; len=295; e=0.00E+00)			5.83	0.7912	0.604636	27	14	0	4	23.1303	23.0602	23.1848	23.2093	23.2049	23.2004	23.2344	23.2813	23.1401	23.1032	23.0703	0.104386	-0.134203	0.193141	0.0128525
m.11667; PMI_002885; m.12183; m.12184	Pmi_572810_G; None; 17569; 17572	GATC_BRAFL_Glutamyl-tRNA(Gln)_amidotransferase_subunit_C,_..CUT; XP_022089576.1 glutamyl-tRNA(Gln) amidotransferase subunit C, mitochondrial-like isoform X1 [Acanthaster planci] (id=80.75%; len=161; e=2.80E-87) ; XP_022089576.1 glutamyl-tRNA(Gln) amidotransferase subunit C, mitochondrial-like isoform X1 [Acanthaster planci] (id=80.58%; len=139; e=9.70E-75) ; XP_022089576.1 glutamyl-tRNA(Gln) amid…	485	2	3.725	0.6693	1.52584	2	2	0	1	17.191	17.2496	17.1669	17.3929	17.265	17.4756	17.4981	17.5278	17.4265	17.484	17.1887	0.0546124	-0.134096	0.50777	0.274687
m.53255; m.22860; m.53249; PMI_024057	79384; Pmi_640562_Z; 79382; None	XP_022094003.1 zinc finger CCCH domain-containing protein 14-like [Acanthaster planci] (id=71.13%; len=97; e=3.04E-27) ; ZC3HE_CHICK_Zinc_finger_CCCH_domain-containing_protein_14; XP_022094003.1 zinc finger CCCH domain-containing protein 14-like [Acanthaster planci] (id=70.83%; len=576; e=0.00E+00) ; XP_022094003.1 zinc finger CCCH domain-containing protein 14-like [Acanthaster planci] (id=64.71%…	2028	1	2.6	0.5335	1.72661	1	1	0	0	14.9197	14.9192	14.5942	14.8558	14.7534	15.0253	15.1267	15.0951	14.9159	14.9965	14.9331	-0.185	-0.133878	0.135614	0.0275033
PMI_013736		XP_022092572.1 tetratricopeptide repeat protein 30A-like [Acanthaster planci] (id=97.37%; len=647; e=0.00E+00)			3.851	0.7219	0.941738	11	8	4	4	20.0158	20.0519	20.0648	20.0918	20.1119	20.2975	20.3818	20.2865	20.2225	20.1811	20.1628	0.0556763	-0.133063	0.125414	0.0278267
PMI_011364; PMI_011363; m.15256	None; None; Pmi_600600_n	XP_022104572.1 glucosidase 2 subunit beta-like [Acanthaster planci] (id=71.73%; len=329; e=3.04E-171) ; XP_022104550.1 uncharacterized protein LOC110986722 [Acanthaster planci] (id=78.72%; len=141; e=1.40E-78) ; no_annot	1930	1	1.86	0.5151	0.977077	4	1	0	0	21.0378	21.0679	20.9848	20.7455	20.8244	20.8908	21.088	21.1173	21.0196	20.8359	20.842	-0.201282	-0.132915	0.0979563	0.228815
PMI_026238; m.36912; m.36913	None; 55610; 55612	XP_022093185.1 glutaminyl-peptide cyclotransferase-like isoform X1 [Acanthaster planci] (id=78.23%; len=418; e=0.00E+00) ; XP_022093185.1 glutaminyl-peptide cyclotransferase-like isoform X1 [Acanthaster planci] (id=81.12%; len=376; e=0.00E+00) ; XP_022093187.1 glutaminyl-peptide cyclotransferase-like isoform X2 [Acanthaster planci] (id=82.51%; len=343; e=0.00E+00)	1590	4	3.625	0.722	0.809272	4	4	0	3	17.9103	18.0262	18.0225	17.9931	18.0414	18.109	18.1039	18.0201	17.8719	17.8935	18.0689	0.0507457	-0.132911	0.538292	0.154571
PMI_003544; m.28033; m.14084	None; 41118; Pmi_592010_R	XP_022101957.1 40S ribosomal protein S14a [Acanthaster planci] (id=100.00%; len=151; e=2.21E-105) ; XP_022101957.1 40S ribosomal protein S14a [Acanthaster planci] (id=100.00%; len=151; e=1.07E-104) ; RS14_DROME_40S_ribosomal_protein_S14_>gi	1460	9	6.029	0.8205	0.403029	53	9	0	0	24.8368	24.611	24.6953	24.6349	24.6784	24.7976	24.7767	24.9432	24.9226	24.6746	24.5217	-0.0543636	-0.132883	0.714331	0.381145
m.39657; m.24758; PMI_026675; m.39659	59900; Pmi_648023_C; None; 59902	XP_022111532.1 CUE domain-containing protein 2-like [Acanthaster planci] (id=67.10%; len=383; e=3.04E-158) ; CUE2B_XENLA_CUE_domain-containing_protein_2-B; XP_022111532.1 CUE domain-containing protein 2-like [Acanthaster planci] (id=65.64%; len=323; e=9.01E-127) ; XP_022111532.1 CUE domain-containing protein 2-like [Acanthaster planci] (id=68.24%; len=381; e=1.86E-162)	236	1	2.435	0.3565	1.2632	1	1	0	0	17.0612	17.0624	17.0322	17.103	17.0186	17.1445	16.9747	17.1606	17.2745	16.4131	17.1937	-0.0105061	-0.132824	0.726736	0.679448
m.11832; m.16352	17178; Pmi_607652_T	XP_022085119.1 transforming growth factor beta receptor type 3-like isoform X1 [Acanthaster planci] (id=74.44%; len=356; e=0.00E+00) ; TGBR3_MOUSE_Transforming_growth_factor_beta_receptor_type_3	2786	2	2.673	0.5649	0.076329	3	2	0	1	17.674	17.7898	17.4932	17.6539	17.7055	17.9044	17.8199	17.7319	17.5695	17.7668	17.7222	-0.114331	-0.132533	0.281947	0.16589
m.19551	Pmi_625510_T	TULP4_HUMAN_Tubby-related_protein_4			3.648	0.6338	1.25302	2	2	2	0	17.1701	17.587	16.8969	17.0158	17.0787	17.0821	17.1718	17.1987	17.0104	17.1039	16.941	-0.381391	-0.13245	0.304333	0.093198
m.28358; PMI_012100	Pmi_660400_C; None	CE112_HUMAN_Centrosomal_protein_of_112_kDa; XP_022103456.1 centrosomal protein of 112 kDa-like [Acanthaster planci] (id=76.26%; len=935; e=0.00E+00)	2503	5	3.193	0.7091	0.773014	5	5	0	5	17.0691	17.3851	17.1051	17.1053	17.2329	17.5069	17.5351	17.5139	17.5042	17.3741	17.2813	-0.0793678	-0.132166	0.703937	0.175609
m.22654; PMI_023319; PMI_023719	Pmi_639800_P; None; None	PEX3_MACFA_Peroxisomal_biogenesis_factor_3; XP_022107142.1 peroxisomal biogenesis factor 3-like [Acanthaster planci] (id=78.42%; len=366; e=0.00E+00) ; XP_022107142.1 peroxisomal biogenesis factor 3-like [Acanthaster planci] (id=85.87%; len=269; e=1.65E-166)	1809	1	3.01	0.4698	1.09585	1	1	0	0	18.4136	19.5253	18.321	18.4057	18.3099	18.7149	18.8387	18.361	18.133	18.627	18.7582	-0.623909	-0.132116	0.462938	0.61076
m.15505	Pmi_602300_R	RA51C_CRIGR_DNA_repair_protein_RAD51_homolog_3			6.155	0.7854	0.077389	2	2	0	2	18.1753	18.5258	17.9045	17.9353	18.095	18.1652	18.1554	18.1489	17.8849	18.0148	18.1736	-0.372271	-0.132059	0.255066	0.254339
m.9768	Pmi_551900_R	RHEB_MOUSE_GTP-binding_protein_Rheb			6.257	0.7615	0.673327	12	7	3	4	21.401	21.5915	21.3788	21.6509	21.728	21.9773	21.9742	21.9598	21.6032	21.8616	22.0514	0.0896486	-0.13169	0.576155	0.417313
m.2671	Pmi_392380_B	BPTF_HUMAN_Nucleosome-remodeling_factor_subunit_BPTF			4.404	0.7284	0.049852	4	2	1	0	18.3922	18.4544	18.3608	18.0535	18.0204	18.2054	17.9795	18.1699	18.1971	17.8349	17.9278	-0.278424	-0.131662	0.115282	0.375119
m.31919	Pmi_670470_D	DMBT1_HUMAN_Deleted_in_malignant_brain_tumors_1_protein			3.841	0.6826	0.299378	7	6	0	6	18.234	18.3913	18.2688	17.9018	18.2741	18.2737	18.3561	18.1592	18.2531	18.1678	17.9732	-0.164392	-0.13165	0.343365	0.26894
PMI_000518		XP_022102245.1 uncharacterized protein LOC110985497 isoform X4 [Acanthaster planci] (id=79.20%; len=3784; e=0.00E+00)			7.53	0.8443	0.008805	550	370	6	106	27.1448	27.1856	27.0999	27.0622	27.1131	27.1651	27.2983	27.3212	27.1429	27.1247	27.1223	-0.073456	-0.131557	0.0965357	0.111507
PMI_005998		XP_022104676.1 sorbitol dehydrogenase-like isoform X1 [Acanthaster planci] (id=80.84%; len=261; e=1.19E-147)			5.128	0.7628	0.584018	14	4	2	0	21.7861	21.6534	21.8063	21.6612	21.6265	21.6773	21.6684	21.7903	21.7845	21.5943	21.363	-0.0217552	-0.131395	0.821487	0.396513
PMI_017440; PMI_002834; m.16946	None; None; Pmi_611250_K	XP_022094006.1 kynurenine--oxoglutarate transaminase 3-like [Acanthaster planci] (id=75.53%; len=327; e=7.79E-172) ; XP_022094006.1 kynurenine--oxoglutarate transaminase 3-like [Acanthaster planci] (id=85.47%; len=468; e=0.00E+00) ; KAT3_MOUSE_Kynurenine--oxoglutarate_transaminase_3	136	5	5.196	0.7932	0.68865	8	5	0	3	21.3429	21.3466	21.21	21.1476	21.2734	21.3635	21.322	21.2633	21.0417	21.1759	21.3377	-0.134423	-0.131212	0.0655235	0.261279
PMI_026116; m.14482	None; Pmi_594961_N	XP_022092404.1 N-acylneuraminate cytidylyltransferase-like [Acanthaster planci] (id=82.19%; len=410; e=0.00E+00) ; NEUA_HUMAN_N-acylneuraminate_cytidylyltransferase	989	6	4.582	0.6945	0.645311	8	6	0	1	19.7215	19.6141	19.7228	19.9836	19.9089	19.8881	19.9835	19.949	19.8369	19.7436	19.8466	0.203983	-0.131168	0.11929	0.0395143
m.27186; m.21860; m.27182; PMI_024277; m.27183	39590; Pmi_636320_P; 39583; None; 39585	XP_022109541.1 platelet-activating factor acetylhydrolase-like isoform X2 [Acanthaster planci] (id=76.86%; len=121; e=4.27E-62) ; PAFA_HUMAN_Platelet-activating_factor_acetylhydrolase; XP_022109541.1 platelet-activating factor acetylhydrolase-like isoform X2 [Acanthaster planci] (id=78.15%; len=325; e=0.00E+00) ; XP_022109539.1 platelet-activating factor acetylhydrolase-like isoform X1 [Acanthast…	330	1	2.617	0.5071	1.38198	1	1	0	0	15.8965	16.6423	16.0289	16.2116	16.0296	15.955	16.2124	16.017	15.6905	16.1908	15.9096	-0.179359	-0.131153	0.714632	0.481891
PMI_001682		XP_022094454.1 uncharacterized protein LOC110981293 isoform X1 [Acanthaster planci] (id=74.73%; len=930; e=0.00E+00)			4.481	0.7893	0.432258	10	7	4	3	21.0003	20.9996	21.0114	20.9044	20.8958	21.0872	21.0346	21.0942	21.0844	20.8465	20.8919	-0.062767	-0.131092	0.233488	0.208988
m.19891; PMI_002636; m.47239	Pmi_627040_n; None; 70745	no_annot; XP_022079965.1 uncharacterized protein LOC110973430 [Acanthaster planci] (id=65.57%; len=273; e=1.67E-113) ; XP_022079965.1 uncharacterized protein LOC110973430 [Acanthaster planci] (id=68.22%; len=129; e=4.89E-53)	2022	1	1.855	0.3164	1.47216	1	1	0	0	17.8153	18.268	17.8386	17.7953	18.0494	18.0611	18.4802	18.1647	17.8002	18.2153	18.2973	-0.147252	-0.131078	0.631863	0.547188
m.19717	Pmi_626260_T	TSN_CHICK_Translin			5.949	0.8462	0.842995	10	5	1	4	21.2792	21.2238	21.2558	21.2465	21.1297	21.2211	21.2882	21.2984	21.2069	21.1057	21.1019	-0.0408422	-0.131059	0.466574	0.0412908
m.26699	Pmi_655010_A	ACADM_BOVIN_Medium-chain_specific_acyl-CoA_dehydrogenase..CUT			7.753	0.8224	0.104956	74	23	1	3	25.9203	25.9424	25.8487	25.8045	25.8718	25.979	26.0551	26.0975	26.0033	25.8532	25.8824	-0.089696	-0.130883	0.0308549	0.0903708
m.56455; m.8713	84284; Pmi_539001_n	XP_022103356.1 probable low-specificity L-threonine aldolase 1 isoform X2 [Acanthaster planci] (id=73.88%; len=134; e=1.78E-57) ; no_annot	463	2	3.423	0.5571	1.37296	2	2	0	0	18.3249	18.1822	18.1952	18.4109	18.3612	18.9089	18.4409	18.6127	18.2874	18.6038	18.6787	0.0688724	-0.130854	0.537005	0.512193
m.20585	Pmi_630570_A	AMPL_XENTR_Cytosol_aminopeptidase			7.28	0.8067	0.868832	20	12	0	3	22.2459	22.4102	22.2135	22.4694	22.3473	22.7226	22.696	22.6919	22.46	22.4997	22.7593	0.0153397	-0.130441	0.9001	0.298591
PMI_025661		XP_022111764.1 nuclear pore complex protein Nup205-like [Acanthaster planci] (id=81.56%; len=358; e=0.00E+00)			2.964	0.6791	1.37727	3	3	1	0	18.8683	18.8943	18.8044	18.6572	18.8575	19.0594	19.0977	18.9787	18.8606	18.9272	18.9568	-0.108275	-0.13039	0.208763	0.0470078
m.23341	Pmi_642570_F	FAM21_RAT_WASH_complex_subunit_FAM21			4.309	0.8188	0.247251	10	7	3	4	19.9833	20.0535	19.9315	19.8169	19.9189	20.0468	20.1463	20.1653	20.0559	20.0067	19.9048	-0.129302	-0.130378	0.0916686	0.0890759
m.32808	49017	XP_022104650.1 heterogeneous nuclear ribonucleoprotein K-like isoform X2 [Acanthaster planci] (id=87.29%; len=118; e=3.01E-50)			4.728	0.7013	0.548408	12	7	1	6	21.321	21.2875	21.281	21.1679	21.1628	21.3655	21.4715	21.3623	21.2701	21.236	21.3026	-0.10038	-0.130226	0.109019	0.0479974
m.18265	Background_P	DCTD_PONAB_Deoxycytidylate_deaminase			4.319	0.4726	1.28302	4	3	1	2	20.9524	20.9458	21.2569	20.547	20.7292	20.7343	20.795	20.7739	20.4684	20.8507	20.5936	-0.104733	-0.130176	0.671421	0.36674
m.13973; m.13975; m.18999	19464; 19465; Pmi_622651_S	XP_022095796.1 serine/arginine repetitive matrix protein 2-like isoform X4 [Acanthaster planci] (id=91.46%; len=246; e=9.38E-133) ; XP_022095796.1 serine/arginine repetitive matrix protein 2-like isoform X4 [Acanthaster planci] (id=92.50%; len=200; e=3.32E-127) ; SRRM2_HUMAN_Serine/arginine_repetitive_matrix_protein_2	2691	2	3.529	0.5763	1.04991	2	2	0	1	18.3579	18.5233	17.9113	17.9796	18.268	18.1792	18.3842	18.3117	18.1762	18.1432	18.1654	-0.387671	-0.130105	0.066615	0.159299
m.17053	22397	XP_022104247.1 F-box only protein 6-like [Acanthaster planci] (id=65.59%; len=311; e=1.96E-143)			6.031	0.7778	0.833105	17	8	0	6	21.8648	22.1277	21.8416	21.9781	22.0304	22.3468	22.4306	22.3581	22.2233	22.2401	22.2828	-0.0461847	-0.129776	0.788867	0.0193552
PMI_010761; m.14396	None; Pmi_594340_C	XP_022104372.1 cytochrome P450 4F4-like [Acanthaster planci] (id=67.19%; len=573; e=0.00E+00) ; CP4F4_RAT_Cytochrome_P450_4F4	216	1	2.15	0.454	1.63584	1	1	0	0	15.8063	16.1285	16.2408	16.1704	16.1974	16.0975	16.1506	15.801	15.178	16.1151	16.3667	0.235445	-0.129749	0.378931	0.759438
PMI_000189		XP_022087767.1 apolipoprotein D-like [Acanthaster planci] (id=62.69%; len=193; e=2.36E-81)			4.911	0.7287	0.892822	15	2	0	0	23.3792	23.2742	23.4409	23.5424	23.5586	23.5603	23.5596	23.555	23.1671	23.4624	23.656	0.187204	-0.129738	0.100855	0.457748
PMI_008250		XP_022081403.1 CXXC-type zinc finger protein 1-like [Acanthaster planci] (id=77.31%; len=432; e=0.00E+00)			3.101	0.5476	1.35504	1	1	1	0	16.9614	16.9833	16.8945	16.4958	16.6663	16.7481	16.82	16.7337	16.3831	16.722	16.8076	-0.286793	-0.12972	0.129803	0.423277
PMI_009844		XP_022091365.1 mitochondrial amidoxime-reducing component 1-like isoform X1 [Acanthaster planci] (id=61.14%; len=175; e=2.00E-59)			2.668	0.5607	0.698496	1	1	1	0	13.3607	14.398	14.0037	14.1111	14.2828	14.104	13.7879	14.0127	13.4802	14.3789	13.6565	0.253192	-0.129668	0.710886	0.691673
m.27470; PMI_012216	39968; None	XP_022095860.1 roundabout homolog 1-like isoform X1 [Acanthaster planci] (id=81.26%; len=1393; e=0.00E+00) ; XP_022095860.1 roundabout homolog 1-like isoform X1 [Acanthaster planci] (id=75.41%; len=984; e=0.00E+00)	2522	4	3.305	0.6525	0.692034	4	4	0	1	17.0221	17.1958	17.2362	16.9856	17.3338	17.2293	17.251	17.1805	16.8186	17.2596	17.1938	0.0762416	-0.12964	0.613443	0.445495
m.8383	Pmi_534670_K	K0284_HUMAN_Protein_KIAA0284			2.211	0.2881	1.69402	1	1	1	0	16.897	16.9424	17.2336	16.5227	16.9763	16.9219	16.9187	16.9792	15.9351	17.356	17.1401	-0.00885676	-0.129591	0.969975	0.797124
PMI_010281		XP_022109885.1 protein disulfide-isomerase A5-like [Acanthaster planci] (id=66.10%; len=531; e=0.00E+00)			6.092	0.744	0.511258	22	12	0	0	22.5166	22.4932	22.5262	22.636	22.5269	22.6169	22.5653	22.6309	22.5071	22.5002	22.4172	0.0582139	-0.129548	0.248353	0.0258315
m.29491; PMI_003457	43825; None	XP_022085359.1 60 kDa SS-A/Ro ribonucleoprotein-like [Acanthaster planci] (id=89.30%; len=542; e=0.00E+00) ; XP_022085359.1 60 kDa SS-A/Ro ribonucleoprotein-like [Acanthaster planci] (id=89.30%; len=542; e=0.00E+00)	2292	2	2.706	0.5333	0.927722	2	2	0	1	18.0082	18.1788	18.005	18.0926	17.9501	18.095	18.1819	18.0661	17.949	18.0338	17.9719	-0.0776247	-0.129472	0.523566	0.044479
PMI_004244		XP_022111083.1 beta-galactosidase-1-like protein 2 isoform X1 [Acanthaster planci] (id=75.48%; len=412; e=0.00E+00)			4.408	0.7269	1.2289	7	7	1	0	19.6783	19.5855	19.5781	19.6583	19.5959	19.7702	19.7319	19.7851	19.6662	19.5483	19.6847	-0.02112	-0.129383	0.734903	0.0797456
m.48451	72448	XP_022084242.1 medium-chain specific acyl-CoA dehydrogenase, mitochondrial-like [Acanthaster planci] (id=91.20%; len=432; e=0.00E+00)			7.753	0.8224	0.168533	82	25	0	10	25.9645	25.9894	25.8955	25.8516	25.9199	26.0243	26.0977	26.1378	26.0444	25.9019	25.9257	-0.0879696	-0.129285	0.0341768	0.0841524
PMI_010782		XP_022086329.1 rab proteins geranylgeranyltransferase component A 2-like [Acanthaster planci] (id=73.43%; len=350; e=5.69E-146)			3.198	0.6336	1.42138	2	2	1	0	19.6064	19.6293	19.5887	19.6766	19.6855	19.5828	19.6442	19.7063	19.461	19.5008	19.584	0.0324311	-0.129199	0.410564	0.0639325
PMI_000827; PMI_002542		XP_022087925.1 probable dimethyladenosine transferase [Acanthaster planci] (id=84.98%; len=273; e=8.31E-165) ; XP_022087925.1 probable dimethyladenosine transferase [Acanthaster planci] (id=73.49%; len=249; e=1.96E-118)	695	8	4.784	0.7337	0.192777	31	8	0	0	24.1058	24.0543	24.0022	24.0128	24.0537	24.2232	24.167	24.1239	24.005	24.0359	24.0859	-0.0571549	-0.12912	0.215514	0.0270758
m.12084	Pmi_576320_C	CB063_MACFA_Uncharacterized_protein_C2orf63_homolog			3.534	0.6463	1.03521	1	1	1	0	15.2584	15.7001	15.7041	15.3778	15.2797	15.5387	15.272	15.0996	15.0681	14.9401	15.5157	-0.0253326	-0.128827	0.931455	0.586184
PMI_005996		XP_022090764.1 RNA polymerase-associated protein LEO1-like [Acanthaster planci] (id=60.27%; len=828; e=0.00E+00)			5.011	0.4485	0.836785	2	2	1	0	16.9627	16.7708	16.8513	16.7289	16.8013	16.7728	16.8847	16.8971	16.75	16.727	16.6913	-0.0729081	-0.128743	0.583351	0.0657656
m.15795; m.14844	Pmi_604220_T; 20293	TYW5_CHICK_tRNA_wybutosine-synthesizing_protein_5; XP_022111913.1 tRNA wybutosine-synthesizing protein 5-like isoform X1 [Acanthaster planci] (id=87.74%; len=310; e=0.00E+00)	733	4	4.645	0.6355	1.12614	4	4	0	3	20.3428	20.2186	20.2275	20.1386	20.0803	20.2451	20.3432	20.4657	20.2574	20.1852	20.2262	-0.131904	-0.128416	0.225211	0.173313
m.35864; m.35858	54013; 54007	WP_013174507.1 carbohydrate kinase family protein [Syntrophothermus lipocalidus] (id=26.17%; len=107; e=4.40E+00) ; WP_013174507.1 carbohydrate kinase family protein [Syntrophothermus lipocalidus] (id=26.17%; len=107; e=6.60E+00)	2376	1	1.34	0.2978	2.36581	1	1	0	0	15.4295	15.5728	15.5537	15.281	15.6985	15.8272	15.5152	15.3989	15.279	15.4158	15.6618	0.00990641	-0.128261	0.948817	0.493195
m.55587	82813	XP_022099020.1 D-3-phosphoglycerate dehydrogenase-like isoform X1 [Acanthaster planci] (id=90.33%; len=538; e=0.00E+00)			5.182	0.771	0.046639	36	12	1	11	24.4572	24.5111	24.5047	24.3735	24.4217	24.5103	24.6017	24.4976	24.4017	24.3671	24.4561	-0.0508861	-0.128253	0.356802	0.0399952
PMI_010141		ACM46824.1 caspase 3/9 [Patiria pectinifera] (id=86.97%; len=307; e=0.00E+00)			6.439	0.7479	0.187866	13	8	6	1	21.6276	21.6019	21.6861	21.6932	21.7131	21.7573	21.7832	21.7761	21.6884	21.628	21.6162	0.0827246	-0.128026	0.0400644	0.0200595
PMI_005939		XP_022082276.1 phenazine biosynthesis-like domain-containing protein 1 isoform X2 [Acanthaster planci] (id=72.49%; len=309; e=2.81E-160)			5.125	0.7583	0.381196	11	6	1	0	20.6769	20.6721	20.5379	20.6135	20.6393	20.7011	20.8382	20.7802	20.655	20.6594	20.6211	-0.0775766	-0.127963	0.124626	0.0737449
m.47181	70679	XP_017143849.1 PREDICTED: dolichyl-diphosphooligosaccharide--protein glycosyltransferase subunit STT3B [Drosophila miranda] (id=28.46%; len=130; e=4.60E+00)			1.269	0.3128	0.345087	1	1	1	0	14.4113	14.2647	13.948	14.1246	13.9349	14.4644	14.6268	14.0423	14.2456	14.3711	14.1338	-0.335495	-0.127624	0.0582921	0.551027
PMI_008725		XP_022108881.1 coronin-1A-like [Acanthaster planci] (id=76.12%; len=490; e=0.00E+00)			8.383	0.8177	0.103258	55	20	1	0	24.6281	24.5758	24.6834	24.6872	24.6786	24.797	24.8369	24.8061	24.5165	24.7199	24.8208	0.0810996	-0.127553	0.195792	0.289223
m.1490	Pmi_318590_n	no_annot			2.197	0.4802	0.840365	1	1	1	0	14.5393	14.5617	14.3882	14.311	14.3515	14.6259	14.5505	14.6365	14.2124	14.4996	14.7184	-0.200245	-0.127493	0.00526721	0.477327
PMI_017040; PMI_014831		XP_022080536.1 nudC domain-containing protein 3-like isoform X1 [Acanthaster planci] (id=78.23%; len=340; e=0.00E+00) ; XP_022080536.1 nudC domain-containing protein 3-like isoform X1 [Acanthaster planci] (id=79.47%; len=341; e=0.00E+00)	1663	2	3.337	0.5552	1.77385	2	2	0	1	17.4217	17.8808	17.5008	18.2224	17.5738	17.9741	17.9263	17.8095	17.8521	17.7827	17.6935	0.114423	-0.127186	0.750402	0.131029
m.8696	Pmi_538720_S	SHP2A_DANRE_Phosphatidylinositol_3,4,5-trisphosphate_5-phosp..CUT			3.881	0.8209	0.095864	1	1	1	0	11.413	12.0069	11.8014	11.2933	11.594	12.1405	11.589	11.3102	11.294	11.8539	11.5107	-0.147025	-0.127028	0.712754	0.690469
PMI_015609		XP_022086417.1 phosphatidylserine decarboxylase proenzyme, mitochondrial-like isoform X4 [Acanthaster planci] (id=65.39%; len=104; e=1.19E-39)			2.959	0.5279	1.58387	1	1	1	0	14.9883	15.1598	14.8852	14.7793	14.4447	15.0648	14.6807	14.8098	15.0755	14.5855	14.5137	-0.37093	-0.126846	0.101151	0.582919
PMI_009231		XP_022102447.1 40S ribosomal protein SA-like [Acanthaster planci] (id=89.31%; len=318; e=0.00E+00)			6.355	0.8595	0.511371	37	11	11	0	24.5585	24.5535	24.6576	24.5491	24.6	24.6886	24.692	24.6366	24.5526	24.5466	24.5378	0.0462726	-0.126747	0.277594	0.0153007
PMI_008431		XP_022079904.1 nostrin-like isoform X2 [Acanthaster planci] (id=80.76%; len=395; e=0.00E+00)			4.948	0.7674	0.793474	6	6	1	0	19.4947	19.501	19.3769	19.3686	19.4141	19.5682	19.6128	19.4985	19.4104	19.5053	19.3845	-0.111364	-0.126471	0.0123217	0.0637979
m.6425; PMI_025769	Pmi_504621_G; None	GPRL1_HUMAN_GLIPR1-like_protein_1; XP_022108764.1 uncharacterized protein LOC110989015 [Acanthaster planci] (id=82.52%; len=143; e=1.28E-79)	801	1	2.016	0.6384	0.094743	1	1	0	0	15.0575	15.3395	15.0238	14.7404	14.9755	15.0947	15.0282	15.3497	15.1659	15.0219	14.9054	-0.28528	-0.126464	0.242316	0.367631
m.33109	49593	XP_022098305.1 H/ACA ribonucleoprotein complex subunit 2-like protein [Acanthaster planci] (id=88.53%; len=157; e=2.65E-91)			3.631	0.6615	1.16252	3	2	1	1	20.4958	20.5263	20.3692	20.2678	20.3454	20.4893	20.5787	20.6224	20.4792	20.3766	20.4558	-0.183615	-0.126274	0.0154254	0.068116
m.17032	Pmi_611880_L	LARP7_HUMAN_La-related_protein_7			4.07	0.6507	1.06559	6	5	0	5	20.1134	20.259	19.8631	19.6354	19.6647	19.7742	19.9297	19.8778	19.717	19.8102	19.6764	-0.465095	-0.126092	0.02607	0.106857
PMI_001206; m.18170	None; 23838	XP_022089117.1 serine--tRNA ligase, mitochondrial-like isoform X2 [Acanthaster planci] (id=64.81%; len=233; e=6.37E-91) ; XP_022089117.1 serine--tRNA ligase, mitochondrial-like isoform X2 [Acanthaster planci] (id=79.42%; len=447; e=0.00E+00)	1163	1	2.921	0.3396	0.679741	1	1	0	0	14.9674	14.9402	14.6502	14.4763	14.0377	14.5315	14.7685	14.4594	14.8603	14.3228	14.1991	-0.565733	-0.125692	0.0891711	0.615419
m.27773	Pmi_658300_A	ADDA_RAT_Alpha-adducin			6.639	0.8513	0.068766	60	29	14	15	24.4425	24.4953	24.4504	24.4444	24.4523	24.4514	24.6095	24.6447	24.5403	24.4002	24.389	-0.0198679	-0.125415	0.589168	0.180665
PMI_007623; m.31617	None; Pmi_669800_P	XP_022098947.1 PAB-dependent poly(A)-specific ribonuclease subunit PAN3-like isoform X4 [Acanthaster planci] (id=79.40%; len=767; e=0.00E+00) ; PAN3_XENTR_PAB-dependent_poly(A)-specific_ribonuclease_s..CUT	1000	1	3.653	0.5823	1.75516	1	1	0	0	16.0484	16.3586	15.8377	16.0545	16.2141	16.2234	16.6938	15.8889	16.1906	16.2197	16.0196	-0.168074	-0.125399	0.469237	0.649798
m.4375	7540	XP_022092544.1 serine/arginine-rich splicing factor 2-like [Acanthaster planci] (id=93.07%; len=101; e=2.72E-60)			5.711	0.8246	0.429871	5	2	2	0	18.3136	18.2152	18.4247	18.5716	18.5314	18.5316	18.6631	18.7479	18.6652	18.5314	18.3704	0.244786	-0.125197	0.0476723	0.307881
m.15813; PMI_010524; m.20779; PMI_004688	21172; None; Pmi_631500_P; None	XP_022086028.1 putative tRNA pseudouridine synthase Pus10 [Acanthaster planci] (id=77.19%; len=548; e=0.00E+00) ; XP_022086028.1 putative tRNA pseudouridine synthase Pus10 [Acanthaster planci] (id=76.46%; len=531; e=0.00E+00) ; PUS10_MOUSE_Putative_tRNA_pseudouridine_synthase_Pus10; XP_022086028.1 putative tRNA pseudouridine synthase Pus10 [Acanthaster planci] (id=72.17%; len=485; e=0.00E+00)	1765	2	3.657	0.626	1.35712	2	2	0	0	17.7266	17.3792	17.5212	17.7106	17.6613	17.6571	17.8762	17.5911	17.4166	17.7524	17.5802	0.0781183	-0.12506	0.732296	0.390192
PMI_014090		XP_022096326.1 LYR motif-containing protein 9-like [Acanthaster planci] (id=72.73%; len=77; e=8.23E-35)			1.349	0.6108	1.31923	1	1	1	0	13.9744	13.9111	13.8466	12.7633	13.8013	13.7774	13.8146	13.9659	13.3542	14.0093	13.8216	-0.472319	-0.124247	0.313243	0.594782
m.30579	Pmi_667201_T	TLN1_HUMAN_Talin-1			5.912	0.7967	0.461045	38	24	4	20	23.9343	23.8768	23.9551	23.8175	23.891	23.9485	24.0499	23.9079	23.6605	23.8574	24.0165	-0.0176732	-0.123966	0.742524	0.355882
PMI_006205		XP_022111916.1 piwi-like protein 1 [Acanthaster planci] (id=77.15%; len=967; e=0.00E+00)			5.177	0.7528	0.214576	8	7	0	7	21.0192	20.9899	21.0345	21.0838	21.032	21.157	21.1894	21.1816	20.9703	21.0597	21.1265	0.0455804	-0.123844	0.137903	0.105565
m.18835	24929	XP_022085375.1 putative RNA polymerase II subunit B1 CTD phosphatase RPAP2 isoform X2 [Acanthaster planci] (id=58.65%; len=399; e=1.78E-132)			2.468	0.6086	1.50445	2	2	0	2	17.1313	17.4613	17.2016	16.9858	16.927	17.1094	17.2702	17.155	16.9487	17.0278	17.1867	-0.258158	-0.123797	0.331286	0.227004
m.7803	Pmi_527340_I	IDS_MOUSE_Iduronate_2-sulfatase			3.363	0.6753	1.06308	2	2	2	0	16.8615	16.9726	16.8311	16.9017	16.8066	16.9266	16.975	16.8062	16.5354	16.9559	16.8455	-0.0705454	-0.123713	0.40405	0.437313
m.14844	Pmi_597630_S	SF3A1_MOUSE_Splicing_factor_3A_subunit_1			4.253	0.727	0.422584	6	6	2	3	19.1482	19.3578	19.1191	19.049	19.1086	19.3783	19.3538	19.319	19.1461	19.296	19.2379	-0.160756	-0.123701	0.359666	0.090201
PMI_010990; m.20174	None; Pmi_628550_I	XP_022098810.1 interferon-related developmental regulator 2-like [Acanthaster planci] (id=88.71%; len=425; e=0.00E+00) ; IFRD1_PIG_Interferon-related_developmental_regulator_1	1267	3	4.666	0.7315	0.486797	4	3	0	3	19.3922	19.4632	19.2661	19.3877	19.4143	19.6637	19.6796	19.6851	19.5031	19.5551	19.5993	-0.0716358	-0.123618	0.30416	0.0411118
m.7432; PMI_017532	Pmi_521160_R; None	RL30_CHICK_60S_ribosomal_protein_L30_>gi; XP_022083411.1 60S ribosomal protein L30-like isoform X1 [Acanthaster planci] (id=98.06%; len=103; e=2.27E-69)	1410	5	4.314	0.7818	0.22584	33	5	0	0	25.4422	25.0727	25.4741	25.4286	25.4705	25.3939	25.4616	25.7358	25.7334	25.3875	25.0999	0.200269	-0.123498	0.473602	0.597141
m.9474; m.56962	Pmi_548500_S; 85165	SORT_MOUSE_Sortilin; XP_022099300.1 sortilin-like [Acanthaster planci] (id=74.79%; len=845; e=0.00E+00)	1636	1	1.896	0.3165	1.04782	1	1	0	0	17.8088	17.6136	17.1209	17.4378	17.8449	17.9614	17.6597	18.0889	17.8914	17.7679	17.6805	-0.243325	-0.123406	0.377222	0.448884
PMI_019563		XP_022106613.1 peptidyl-glycine alpha-amidating monooxygenase-like [Acanthaster planci] (id=80.21%; len=374; e=0.00E+00)			3.363	0.6964	0.450353	2	2	0	0	16.7517	16.7149	16.7412	16.7239	16.3227	16.5484	16.6714	16.586	16.1397	16.7368	16.5601	-0.137412	-0.123038	0.421015	0.561554
m.30230	Pmi_666062_P	PDIA5_MOUSE_Protein_disulfide-isomerase_A5			6.092	0.7861	0.324226	24	12	1	11	22.7338	22.722	22.7553	22.7636	22.7797	22.8516	22.8087	22.8684	22.711	22.7647	22.684	0.0383159	-0.123011	0.0270774	0.0166388
m.25148; PMI_010279; PMI_014987	Pmi_649293_S; None; None	SOS2_HUMAN_Son_of_sevenless_homolog_2; XP_022105287.1 son of sevenless homolog 1-like isoform X2 [Acanthaster planci] (id=76.48%; len=676; e=0.00E+00) ; XP_022105287.1 son of sevenless homolog 1-like isoform X2 [Acanthaster planci] (id=91.69%; len=349; e=0.00E+00)	42	1	3.329	0.6038	1.53781	1	1	0	0	14.7603	14.8666	14.9141	15.2911	15.124	15.4099	15.0032	14.5875	14.691	15.1925	14.7489	0.296272	-0.122773	0.100015	0.692317
PMI_016153		XP_022106709.1 cytosol aminopeptidase-like [Acanthaster planci] (id=81.21%; len=564; e=0.00E+00)			7.28	0.8067	0.553615	20	12	0	11	22.2129	22.3788	22.1745	22.4335	22.3042	22.6814	22.6545	22.657	22.4218	22.4707	22.7328	0.00817784	-0.122545	0.947129	0.331866
PMI_021493		XP_022103856.1 selenoprotein M-like [Acanthaster planci] (id=57.39%; len=115; e=1.22E-33)			5.769	0.8093	0.742406	8	7	7	0	22.2023	22.1052	22.2492	22.1937	22.2566	22.2869	22.2303	22.2913	22.2169	22.1734	22.0507	0.0794453	-0.122487	0.323331	0.119146
PMI_000281		PKK29811.1 histone H3 [Columba livia] (id=73.39%; len=218; e=5.42E-95)			3.77	0.7065	0.079075	24	5	0	2	24.3066	24.5247	24.2119	24.3455	24.3797	24.6941	24.5729	24.62	24.461	24.5259	24.5331	-0.103283	-0.122372	0.509131	0.0526527
PMI_020508; PMI_007524; m.25706; m.28616	None; None; Pmi_651520_L; 42228	XP_022093239.1 probable lysosomal cobalamin transporter [Acanthaster planci] (id=73.72%; len=529; e=0.00E+00) ; XP_022093239.1 probable lysosomal cobalamin transporter [Acanthaster planci] (id=76.75%; len=529; e=0.00E+00) ; LMBD1_NEMVE_Probable_lysosomal_cobalamin_transporter; XP_022093239.1 probable lysosomal cobalamin transporter [Acanthaster planci] (id=86.17%; len=528; e=0.00E+00)	1474	1	3.579	0.6055	1.24294	1	1	0	0	17.4965	17.3326	17.3369	17.3335	17.5623	17.9205	17.7267	17.5151	17.3312	17.7152	17.749	-0.00365453	-0.122293	0.976292	0.53028
PMI_002129		XP_022106135.1 TBC1 domain family member 5-like isoform X2 [Acanthaster planci] (id=77.98%; len=722; e=0.00E+00)			4.142	0.7856	0.926912	5	4	0	4	19.9015	19.9894	19.824	19.8603	19.79	19.8958	19.7728	19.868	19.799	19.6998	19.6711	-0.120708	-0.122227	0.176915	0.0853707
m.52664	78512	XP_022111764.1 nuclear pore complex protein Nup205-like [Acanthaster planci] (id=89.24%; len=316; e=0.00E+00)			4.981	0.7294	0.815633	4	3	0	0	19.2435	19.3663	19.2693	19.215	19.319	19.5352	19.5922	19.4238	19.3756	19.358	19.4513	-0.0371076	-0.122122	0.65692	0.116321
m.23167; m.43534	Pmi_641723_n; 65425	no_annot; XP_022094725.1 putative protein TPRXL isoform X1 [Acanthaster planci] (id=70.18%; len=218; e=2.64E-32)	2480	1	2.462	0.357	1.95879	1	1	0	0	16.1385	16.0867	16.2287	15.4986	15.9583	14.9871	15.613	15.4423	15.1923	15.6502	14.8337	-0.217367	-0.122059	0.415248	0.707098
m.12223	Pmi_577560_C	CYSK_EMENI_Cysteine_synthase			3.861	0.662	1.05553	3	3	1	2	19.604	19.6869	19.4457	19.2568	19.5118	19.709	19.8041	19.7445	19.6281	19.6212	19.6431	-0.240668	-0.121741	0.0735881	0.0421998
PMI_014317; PMI_006120; m.22057; m.36198; m.36197	None; None; Pmi_637090_E; 54515; 54514	XP_022107255.1 uncharacterized protein LOC110988236 [Acanthaster planci] (id=73.77%; len=446; e=0.00E+00) ; XP_022107255.1 uncharacterized protein LOC110988236 [Acanthaster planci] (id=73.14%; len=458; e=0.00E+00) ; EXD1_MOUSE_Exonuclease_3p-5p_domain-containing_protein_1; XP_022107255.1 uncharacterized protein LOC110988236 [Acanthaster planci] (id=72.02%; len=436; e=0.00E+00) ; XP_022107255.1 un…	510	1	5.083	0.7079	1.37837	2	1	0	0	16.1806	15.9627	16.3697	16.3518	16.2497	16.2918	16.4085	16.279	16.028	16.1652	16.4224	0.252124	-0.121235	0.232511	0.408911
PMI_009193		XP_022095032.1 uncharacterized protein LOC110981619 isoform X2 [Acanthaster planci] (id=63.03%; len=449; e=4.51E-178)			5.23	0.7961	0.494873	23	9	1	0	22.3009	22.2831	22.3001	22.3001	22.2576	22.2568	22.3545	22.3171	22.0745	22.2015	22.2888	-0.00612949	-0.121184	0.738698	0.18116
m.41901; PMI_016644	63378; None	XP_022087751.1 deleted in malignant brain tumors 1 protein-like [Acanthaster planci] (id=80.00%; len=325; e=1.79E-167) ; XP_022087751.1 deleted in malignant brain tumors 1 protein-like [Acanthaster planci] (id=71.27%; len=637; e=0.00E+00)	1858	2	3.841	0.6826	1.27163	2	2	0	1	17.112	17.3402	17.0917	16.799	17.1679	17.1448	17.4975	17.0502	16.7483	17.326	17.2549	-0.206581	-0.121096	0.298484	0.624338
m.19029	Pmi_623000_E	EIF3C_DANRE_Eukaryotic_translation_initiation_factor_3_subunit_C			4.917	0.7673	0.436662	26	14	0	0	23.3531	23.4315	23.3019	23.3729	23.3983	23.5963	23.6972	23.6099	23.3887	23.5188	23.6335	-0.0345903	-0.120813	0.548739	0.224118
m.47314; m.18025	70883; Pmi_617590_L	XP_022102994.1 lysM and putative peptidoglycan-binding domain-containing protein 3-like [Acanthaster planci] (id=79.58%; len=289; e=3.76E-158) ; LYSM4_XENLA_LysM_and_putative_peptidoglycan-binding_domai..CUT	1055	1	3.535	0.6696	0.517069	1	1	0	0	15.5572	15.8164	15.3165	15.3698	15.7601	15.6776	15.631	15.5322	15.1109	15.6612	15.7071	-0.204636	-0.120518	0.367048	0.596699
m.32447; PMI_005359; m.30276	48545; None; Pmi_666190_W	XP_022080790.1 WD repeat-containing protein 34-like [Acanthaster planci] (id=88.77%; len=454; e=0.00E+00) ; XP_022080790.1 WD repeat-containing protein 34-like [Acanthaster planci] (id=89.43%; len=454; e=0.00E+00) ; WDR34_MOUSE_WD_repeat-containing_protein_34	2009	4	3.475	0.7624	0.516444	5	4	0	3	20.9269	20.9253	20.8066	20.8387	20.7604	20.8533	20.9045	20.8855	20.7792	20.7616	20.7414	-0.124191	-0.120409	0.0317244	0.00389136
PMI_014142		XP_022085618.1 protein orai-2-like [Acanthaster planci] (id=72.25%; len=209; e=7.01E-94)			3.979	0.6818	1.2167	1	1	1	0	15.0958	15.0107	15.0158	15.0776	14.6455	14.5919	15.2883	15.3227	14.8053	14.8514	15.1853	-0.140328	-0.120334	0.411411	0.682704
m.29499	Pmi_663840_D	DDX6_XENTR_Probable_ATP-dependent_RNA_helicase_ddx6			7.646	0.7845	0.08756	104	29	1	28	26.4689	26.4185	26.4065	26.3906	26.4536	26.5071	26.5593	26.4526	26.2582	26.4456	26.4544	-0.026794	-0.120267	0.480197	0.192715
m.54991; m.31269; PMI_015687; PMI_012612	81815; Pmi_668990_R; None; None	XP_022096346.1 pre-rRNA processing protein FTSJ3-like [Acanthaster planci] (id=83.99%; len=893; e=0.00E+00) ; RRMJ3_CHICK_Putative_rRNA_methyltransferase_3; XP_022096346.1 pre-rRNA processing protein FTSJ3-like [Acanthaster planci] (id=76.69%; len=944; e=0.00E+00) ; XP_022096346.1 pre-rRNA processing protein FTSJ3-like [Acanthaster planci] (id=83.31%; len=893; e=0.00E+00)	504	2	2.671	0.5578	1.56452	2	2	0	1	18.0286	18.1277	17.9873	18.2836	18.2272	18.2936	18.3044	18.1987	18.1771	18.3009	17.9582	0.0879157	-0.120166	0.460682	0.354615
PMI_003924; m.13210	None; Pmi_585341_R	XP_022104513.1 60S ribosomal protein L11 isoform X3 [Acanthaster planci] (id=98.32%; len=179; e=1.22E-126) ; RL11_PONAB_60S_ribosomal_protein_L11	424	7	5.158	0.7776	0.174293	35	7	0	5	25.6374	25.698	25.5935	25.6235	25.542	25.6025	25.7381	25.7066	25.5778	25.546	25.5629	-0.0813647	-0.120151	0.157374	0.0927096
m.24607	Pmi_647390_D	DYST_MOUSE_Dystonin			5.502	0.7395	1.05793	6	4	3	0	20.552	20.6829	20.638	20.5391	20.5572	20.7984	20.7891	20.7951	20.5664	20.6349	20.8211	-0.0393466	-0.120021	0.657844	0.255328
m.17226; m.14967; m.14966; PMI_014898	Pmi_613250_C; 20404; 20403; None	CILP1_HUMAN_Cartilage_intermediate_layer_protein_1; XP_013400492.1 mucin-5AC-like [Lingula anatina] (id=66.12%; len=304; e=1.41E-149) ; XP_013400492.1 mucin-5AC-like [Lingula anatina] (id=66.12%; len=304; e=1.30E-149) ; QAA96015.1 mucin-related protein [Asterias rubens] (id=82.70%; len=289; e=0.00E+00)	313	2	3.043	0.5642	0.736059	2	2	0	0	17.3409	17.4711	16.9521	16.8015	16.919	16.8727	17.6985	17.0288	17.1967	17.0897	16.9539	-0.515165	-0.119905	0.0233949	0.687714
m.22796	Pmi_640143_G	GDIR1_HUMAN_Rho_GDP-dissociation_inhibitor_1			7.384	0.7765	0.510148	34	7	1	6	24.1599	24.0589	24.1294	24.2064	24.1934	24.1783	24.3118	24.1836	24.0586	24.1045	24.151	0.0669629	-0.119848	0.389743	0.0927372
m.18509	Pmi_620185_n	no_annot			5.267	0.7243	1.49085	2	2	2	0	18.581	18.5164	18.3333	18.1676	18.3015	18.629	18.3522	18.6298	18.6289	18.386	18.2379	-0.281243	-0.119444	0.01889	0.463141
m.15156	Pmi_600010_D	DNJB5_MOUSE_DnaJ_homolog_subfamily_B_member_5			3.175	0.6236	0.688677	2	2	1	1	16.9095	17.0477	16.9365	16.6699	17.2701	16.9352	17.2733	17.0079	16.925	16.9784	16.9563	-0.0197879	-0.118888	0.923412	0.366682
PMI_016879		XP_022109917.1 rho GTPase-activating protein 45-like isoform X2 [Acanthaster planci] (id=79.45%; len=1246; e=0.00E+00)			3.82	0.6956	1.35701	4	4	1	3	17.6357	17.5251	17.3962	17.5356	17.4684	17.5544	17.8693	17.7485	17.5351	17.6537	17.6271	-0.113671	-0.118763	0.235268	0.326233
m.30386; m.30389; PMI_003346; m.28382	45263; 45264; None; Pmi_660391_Z	XP_022079728.1 zinc finger protein 622-like [Acanthaster planci] (id=79.72%; len=424; e=0.00E+00) ; XP_022079728.1 zinc finger protein 622-like [Acanthaster planci] (id=79.48%; len=424; e=0.00E+00) ; XP_022079728.1 zinc finger protein 622-like [Acanthaster planci] (id=60.95%; len=420; e=1.04E-148) ; ZN622_HUMAN_Zinc_finger_protein_622	1092	6	4.342	0.6944	0.560474	7	6	0	0	20.4039	20.6654	20.3937	20.4226	20.4476	20.5313	20.5134	20.5051	20.4543	20.3073	20.4321	-0.113331	-0.118698	0.544398	0.118114
PMI_015170		XP_022097137.1 uncharacterized protein LOC110982777 [Acanthaster planci] (id=26.33%; len=357; e=1.44E-21)			5.114	0.6613	1.25976	3	2	1	0	19.7275	19.6721	19.7206	19.6459	19.6207	19.7062	19.8346	19.9357	19.6695	19.7343	19.7168	-0.0374376	-0.118606	0.431268	0.21017
m.23356	Pmi_642460_E	EMAP_STRPU_77_kDa_echinoderm_microtubule-associated_protein			8.165	0.8209	0.011572	41	15	0	14	23.8063	23.77	23.9008	23.8148	23.8265	23.7654	23.7938	23.8078	23.8468	23.6386	23.526	0.0591759	-0.118522	0.166346	0.333905
m.20535; m.17685	27853; Pmi_615716_F	XP_022094487.1 protein FAM292A-like [Acanthaster planci] (id=73.09%; len=275; e=3.91E-128) ; F192A_MOUSE_Protein_FAM292A	2104	11	4.084	0.6818	0.107571	12	11	0	10	21.4931	21.5572	21.3522	21.4133	21.4516	21.6536	21.6751	21.6463	21.4561	21.4423	21.7212	-0.119481	-0.118452	0.0867352	0.321465
m.12074; m.16385	17461; Pmi_607910_K	XP_022111763.1 calcium-activated potassium channel subunit alpha-1-like isoform X4 [Acanthaster planci] (id=91.21%; len=569; e=0.00E+00) ; KCMA1_CHICK_Calcium-activated_potassium_channel_subunit_alpha-1	1551	1	2.067	0.6357	1.5879	1	1	0	0	15.3723	15.149	15.3335	15.2967	15.5243	15.721	15.5897	15.8504	15.7555	15.6196	15.4307	0.124141	-0.11843	0.455152	0.384059
m.19900; PMI_007941	Pmi_627100_P; None	PHB_CHICK_Prohibitin; XP_022104271.1 prohibitin-like [Acanthaster planci] (id=96.03%; len=277; e=0.00E+00)	33	12	5.913	0.7973	0.230122	74	12	0	11	25.3998	25.4949	25.3659	25.3592	25.3559	25.4939	25.5385	25.505	25.3716	25.349	25.4619	-0.0870377	-0.118304	0.317145	0.0604901
PMI_009446		XP_022104828.1 T-complex protein 1 subunit delta-like [Acanthaster planci] (id=92.80%; len=528; e=0.00E+00)			6.378	0.8198	0.154019	71	22	3	19	25.1136	24.9799	25.0542	25.081	25.1081	25.1954	25.2035	25.221	25.0783	25.0692	25.1176	0.0343485	-0.118291	0.697838	0.00596806
PMI_012347		XP_022079282.1 anoctamin-4-like isoform X2 [Acanthaster planci] (id=67.28%; len=541; e=0.00E+00)			2.03	0.3892	1.96754	2	2	2	0	23.228	24.3682	23.2771	23.1858	23.1929	23.2256	23.1349	23.1592	23.1218	22.9835	23.0596	-0.579545	-0.118279	0.494496	0.07937
m.34666	52235	XP_022098497.1 neurogenic locus notch homolog protein 1-like [Acanthaster planci] (id=53.85%; len=117; e=4.09E-31)			5.925	0.8302	0.762999	25	6	1	0	24.5968	24.7431	24.482	24.4679	24.4524	24.7142	24.7383	24.6938	24.6238	24.5446	24.623	-0.202518	-0.118252	0.216697	0.0289296
PMI_011596		XP_022101422.1 paladin-like [Acanthaster planci] (id=85.80%; len=655; e=0.00E+00)			4.876	0.6745	0.506599	5	5	0	5	19.1193	19.3362	19.191	19.2018	19.3515	19.6872	19.4792	19.6143	19.3521	19.4858	19.5882	0.0203529	-0.118219	0.885864	0.267143
m.3187	Pmi_415830_Y	Y1760_DROME_Probable_G-protein_coupled_receptor_CG31760			2.008	0.3088	1.73301	1	1	1	0	18.809	18.7365	18.9121	18.8463	19.0825	19.093	18.888	18.8817	18.6622	18.8708	18.977	0.174239	-0.117604	0.121228	0.370743
m.46098; m.46097; m.46108	69130; 69129; 69135	XP_022091530.1 LOW QUALITY PROTEIN: acyl-CoA synthetase family member 2, mitochondrial-like [Acanthaster planci] (id=76.97%; len=165; e=3.84E-86) ; XP_022110122.1 acyl-CoA synthetase family member 2, mitochondrial-like [Acanthaster planci] (id=71.50%; len=214; e=8.20E-89) ; XP_022110122.1 acyl-CoA synthetase family member 2, mitochondrial-like [Acanthaster planci] (id=72.25%; len=173; e=3.53E-66)	964	1	1.769	0.4737	1.50019	1	1	0	0	15.4349	15.1358	15.3373	15.269	15.3424	15.5421	15.5869	15.2349	15.2757	15.3884	15.3474	0.0308803	-0.117426	0.870653	0.401988
[truncated: 6,438 more rows]

## Sheet: regulated
name	accession	description	group_id	group_um	xcorr_max	dcn_max	ppm_min	tp	up	um	rp	log2 Control M2-1	log2 Control M2-2	log2 Emetine M2-1	log2 Emetine M2-2	log2 Emetine M2-3	log2 Control 2PN-1	log2 Control 2PN-2	log2 Control 2PN-3	log2 Emetine 2PN-1	log2 Emetine 2PN-2	log2 Emetine 2PN-3	log2 ratio Emetine M2- Control M2	log2 ratio Emetine 2PN- Control 2PN	pvalue Emetine M2 -control M2	pvalue Emetine 2PN -control 2PN	regulated?
[truncated: 108 more rows]
