# Supplementary material for: Selective dephosphorylation by PP2A-B55 directs the meiosis I-meiosis II transition in oocytes
Source: eLife. 2021 Aug 3;10:e70588. doi: 10.7554/eLife.70588 (PMC8370769; doi:10.7554/eLife.70588)
Supplement: Supplementary file 5. [file elife-70588-supp5.xlsx]

## Sheet: Supp File 5
Column	description
ref	protein name
modsites	phosphorylation site
description	protein description
phos_centered	amino acids surrounding phosphorylation site
charge	peptide charge state
xcorr_max	maximum xcorr parameter for protein identification
dcn_max	maximum dcn parameter for protein identification
ppm_min	minimum part per million parameter for protein identification
localization_max	maximum phosphorylation site probability
tp[time course_1]	total peptide count multiplex 1
tp[time course_2]	total peptide count multiplex 2
tp[time course_3]	total peptide count multiplex 3
tp[Caly]	total peptide count Calyculin A treatment
Prophase 1	average normalized TMT reporter ion intensity for indicated peptide in prophase 1
GVBD	average normalized TMT reporter ion intensity for indicated peptide in GVBD
M1	average normalized TMT reporter ion intensity for indicated peptide in M1
M2	average normalized TMT reporter ion intensity for indicated peptide in M2
2-PN	average normalized TMT reporter ion intensity for indicated peptide in 2-PN
FC	average normalized TMT reporter ion intensity for indicated peptide in FC
Pearson correlation	Pearson correlation coefficient of normalized TMT reporter ion intentsities between multiplxes
pvalue	pvalue of Pearson correlation coefficient
Phase	phase of maximum TMT reporter ion intensity
Calyculin A_0 min	average normalized TMT reporter ion intensity for indicated peptide in Calyculin A treatment 0 min
Calyculin A_30 min	average normalized TMT reporter ion intensity for indicated peptide in Calyculin A treatment 30 min
Calyculin A_70 min	average normalized TMT reporter ion intensity for indicated peptide in Calyculin A treatment 70 min
pvalue0_30	pvalue of comparison of TMT reporter ion intensity at 30 min Calyculin A treatment compared to 0 min
pvalue0_70	pvalue of comparison of TMT reporter ion intensity at 70 min Calyculin A treatment compared to 0 min

## Sheet: summary
ref	modsites	description	phos_centered	charge state	xcorr_max	dcn_max	ppm_min	localization_max	tp[time course_1]	tp[time course_2]	tp[time course_3]	tp[Caly]	modsites	Prophase 1	GVBD	M1	M2	2-PN	FC	Pearson correlation	pvalue	Phase	Calyculin A_0 min	Calyculin A_30 min	Calyculin A_70 min	pvalue0_30	pvalue0_70
PMI_017118; Pmi_647701_NDC1_XENLA_Nucleoporin_NDC1|m.24680; 61854|m.40910; 61852|m.40909	T318; T281; T315; T315	XP_022109750.1 nucleoporin NDC1-like [Acanthaster planci] (id=70.88%; len=546; e=0.00E+00) ; NDC1_XENLA_Nucleoporin_NDC1; XP_022109750.1 nucleoporin NDC1-like [Acanthaster planci] (id=71.83%; len=387; e=0.00E+00) ; XP_022109750.1 nucleoporin NDC1-like [Acanthaster planci] (id=76.24%; len=543; e=0.00E+00)	SVASPITPVPGMD; SVASPITPVPGMD; SVASPITPVPGMD; SVASPITPVPGMD	3	3.046	0.6894	0.025712	1	2	1	1		T318; T281; T315; T315	0	0.400967	0.0237877	0.0425902	1	0.105152	0.979658	0.00061647	2-PN
Pmi_650720_PO210_RAT_Nuclear_pore_membrane_glycoprotein_210|m.25458; PMI_019692; PMI_006773	S1065:S1075; S953:S963; S1005:S1015	PO210_RAT_Nuclear_pore_membrane_glycoprotein_210; XP_022099452.1 nuclear pore membrane glycoprotein 210-like isoform X2 [Acanthaster planci] (id=76.99%; len=943; e=0.00E+00) ; XP_022099451.1 nuclear pore membrane glycoprotein 210-like isoform X1 [Acanthaster planci] (id=85.05%; len=883; e=0.00E+00)	STQQQRSPTKLWS,LWSTAYSPQEGTS; STQQQRSPTKLWS,LWSTAYSPQEGTS; STQQQRSPTKLWS,LWSTAYSPQEGTS	3	3.21	0.2836	0.158317	0.99729	1	1	1		S1065:S1075; S953:S963; S1005:S1015	0.022737	0.867112	0.557026	0.372521	0.970034	0.29208	0.886262	0.0186689	2-PN
PMI_013681	S311:Y312	XP_022097330.1 major facilitator superfamily domain-containing protein 6-like [Acanthaster planci] (id=67.40%; len=365; e=1.54E-163)	VAYMKFSYEGIKT,AYMKFSYEGIKTD	2	1.345	0.339	0.451794	1	1	1	1		S311:Y312	0.00712193	0.0239826	0.104944	0.147513	1	0.157285	0.995848	2.58222e-05	2-PN
Pmi_650720_PO210_RAT_Nuclear_pore_membrane_glycoprotein_210|m.25458; PMI_006773; PMI_019692	S1081; S1021; S969	PO210_RAT_Nuclear_pore_membrane_glycoprotein_210; XP_022099451.1 nuclear pore membrane glycoprotein 210-like isoform X1 [Acanthaster planci] (id=85.05%; len=883; e=0.00E+00) ; XP_022099452.1 nuclear pore membrane glycoprotein 210-like isoform X2 [Acanthaster planci] (id=76.99%; len=943; e=0.00E+00)	SPQEGTSPQY---; SPQEGTSPQY---; SPQEGTSPQY---	2,3	4.786	0.821	0.050199	1	2	2	1	1	S1081; S1021; S969	0.0155013	0.243369	0.266618	0.708419	1	0.58607	0.81125	0.0500778	2-PN	0.151159	0.27356	0.901377	0.0905131	0.00929314
PMI_009043; Pmi_606492_WDR49_HUMAN_WD_repeat-containing_protein_49|m.16159	S537; S724	XP_022090763.1 WD repeat-containing protein 49-like isoform X3 [Acanthaster planci] (id=90.31%; len=640; e=0.00E+00) ; WDR49_HUMAN_WD_repeat-containing_protein_49	PSQPSVSPRQLES; PSQPSVSPRQLES	2,3	4.065	0.7719	0.171036	0.99999	2	2	1	1	S537; S724	0.038299	0.545583	0.892838	0.738297	0.947229	0.917394	0.835418	0.038402	2-PN	0.217305	0.329913	0.954923	0.00130108	0.000168861
PMI_026620; PMI_004356; Pmi_565780_FA81A_HUMAN_Protein_FAM81A|m.10926	S40; S40; S40	XP_022108711.1 protein FAM81A-like [Acanthaster planci] (id=66.67%; len=312; e=1.41E-140) ; XP_022108711.1 protein FAM81A-like [Acanthaster planci] (id=75.33%; len=381; e=0.00E+00) ; FA81A_HUMAN_Protein_FAM81A	FFGSRGSPLFEDS; FFGSRGSPLFEDS; FFGSRGSPLFEDS	2,3	4.558	0.6372	0.602504	1	2	1	1		S40; S40; S40	0.0310457	0.508932	0.602106	0.911156	0.957787	0.802469	0.913437	0.0109153	2-PN
Pmi_655660_CP110_MOUSE_Centriolar_coiled-coil_protein_of_110_kDa|m.26878; PMI_000084	T209; T209	CP110_MOUSE_Centriolar_coiled-coil_protein_of_110_kDa; XP_022089339.1 cytosolic endo-beta-N-acetylglucosaminidase-like isoform X2 [Acanthaster planci] (id=81.65%; len=714; e=0.00E+00)	REDTSHTPVDMTQ; REDTSHTPVDMTQ	3,4	2.113	0.6872	0.001637	1	4	3	5	3	T209; T209	0.0476193	0.570115	0.970968	0.861639	0.982102	0.897832	0.974771	0.000946732	2-PN	0.139201	0.213828	0.977331	0.0127815	6.94138e-06
PMI_024310	T280	XP_022108129.1 46 kDa FK506-binding nuclear protein-like isoform X3 [Acanthaster planci] (id=51.87%; len=428; e=1.63E-95)	QTPTAKTPTVGRG	2,3	1.959	0.5835	0.072019	0.99999	2	3	1	1	T280	0.01722	0.435263	0.242276	0.542957	1	0.46566	0.997235	1.14599e-05	2-PN	0.0213031	0.350305	0.956623	0.0012325	0.000612227
Pmi_534310_SF3_HELAN_Pollen-specific_protein_SF3|m.8361	T108	SF3_HELAN_Pollen-specific_protein_SF3	FEPKSVTPAKPAV	3	2.258	0.5806	0.085015	1	1	1	2	1	T108	0.0292698	0.752476	0.659194	0.429519	1	0.378369	0.989066	0.000178664	2-PN	0.0427775	0.377624	0.970826	2.23839e-07	0.000198025
PMI_016999; Pmi_671270_DMD_CHICK_Dystrophin|m.32188; PMI_018044; 20393|m.14954	S805; S3569; S766; S287	XP_022094793.1 dystrophin-like [Acanthaster planci] (id=88.91%; len=1019; e=0.00E+00) ; DMD_CHICK_Dystrophin; XP_022094793.1 dystrophin-like [Acanthaster planci] (id=91.86%; len=1008; e=0.00E+00) ; XP_022094793.1 dystrophin-like [Acanthaster planci] (id=95.70%; len=488; e=0.00E+00)	LESPVTSPQQMAN; LESPVTSPQQMAN; LESPVTSPQQMAN; LESPVTSPQQMAN	4	6.013	0.7686	0.020071	0.99575	4	5	4	2	S805; S3569; S766; S287	0.0277364	0.681873	0.577064	0.759546	0.977099	0.871874	0.94606	0.00428588	2-PN	0.11732	0.192226	0.88334	0.0955238	0.00584181
PMI_024487; Pmi_621180_GLNA_SQUAC_Glutamine_synthetase,_mitochondrial|m.18725	S331; S342	XP_022084225.1 glutamine synthetase-like [Acanthaster planci] (id=87.74%; len=367; e=0.00E+00) ; GLNA_SQUAC_Glutamine_synthetase,_mitochondrial	LEDRRPSSNCDPY; LEDRRPSSNCDPY	2,3	1.248	0.5881	0.119576	0.99674	2	2	1		S331; S342	0.0358858	0.0931151	0.967906	0.728475	0.968064	0.693692	0.931922	0.00679424	2-PN
PMI_000263; 83624|m.56120; 83627|m.56129; Pmi_670130_DNMT1_PARLI_DNA_(cytosine-5)-methyltransferase_PliMCI|m.31757; PMI_006259; 83622|m.56115	S320:S331; S153:S164; S90:S101; S293:S304; S316:S327; S154:S165	AFR91943.1 DNA cytosine-5-methyltransferase 1 [Patiria pectinifera] (id=95.74%; len=1619; e=0.00E+00) ; AFR91943.1 DNA cytosine-5-methyltransferase 1 [Patiria pectinifera] (id=99.31%; len=1451; e=0.00E+00) ; AFR91943.1 DNA cytosine-5-methyltransferase 1 [Patiria pectinifera] (id=99.42%; len=1383; e=0.00E+00) ; DNMT1_PARLI_DNA_(cytosine-5)-methyltransferase_PliMCI; AFR91943.1 DNA cytosine-5-methyl…	PQLRKRSESTTPA,PANIPKSPTKQAP; PQLRKRSESTTPA,PANIPKSPTKQAP; PQLRKRSESTTPA,PANIPKSPTKQAP; PQLRKRSESTTPA,PANIPKSPTKQAP; PQLRKRSESTTPA,PANIPKSPTK---; PQLRKRSESTTPA,PANIPKSPTKQAP	3,5	2.849	0.4796	0.430569	0.99636	2	3	2		S320:S331; S153:S164; S90:S101; S293:S304; S316:S327; S154:S165	0.0304269	0.102042	0.571412	0.709479	1	0.892989	0.996812	1.5232e-05	2-PN
59908|m.39664	T271	XP_022108129.1 46 kDa FK506-binding nuclear protein-like isoform X3 [Acanthaster planci] (id=55.81%; len=473; e=2.57E-125)	STEKGQTPQGQTP	3,4	2.667	0.6428	0.112971	1	3	2	2	1	T271	0.03494	0.753918	0.742795	0.784263	1	0.384563	0.968294	0.00149192	2-PN	0.0855479	0.333905	0.954927	0.00594799	0.000462521
Pmi_493220_no_annot|m.5840; PMI_012647	S75; S14	no_annot; XP_022092771.1 uncharacterized protein LOC110980418 isoform X4 [Acanthaster planci] (id=82.04%; len=1342; e=0.00E+00)	GTPSYPSPLDRIR; GTPSYPSPLDRIR	2,3	3.36	0.6673	0.234519	1	2	2	2		S75; S14	0.0598262	0.647897	0.744888	0.524156	1	0.299122	0.985699	0.00030531	2-PN
Pmi_612972_CCD24_HUMAN_Coiled-coil_domain-containing_protein_24|m.17210; PMI_019399; PMI_007219; 14551|m.9503	S128; S155; S128; S61	CCD24_HUMAN_Coiled-coil_domain-containing_protein_24; XP_022107655.1 coiled-coil domain-containing protein 24-like [Acanthaster planci] (id=75.12%; len=414; e=1.30E-180) ; XP_022107655.1 coiled-coil domain-containing protein 24-like [Acanthaster planci] (id=79.22%; len=308; e=3.84E-160) ; XP_022107655.1 coiled-coil domain-containing protein 24-like [Acanthaster planci] (id=71.70%; len=311; e=1.04…	DYALNDSPRDCST; DYALNDSPRDCST; DYALNDSPRDCST; DYALNDSPRDCST	2,3	5.205	0.771	0.330738	1	1	1	2		S128; S155; S128; S61	0.051867	0.330089	0.713421	0.749531	0.978879	0.713428	0.892391	0.0167465	2-PN
66023|m.43966; PMI_015458; PMI_004111	S27; S27; S27	XP_022085134.1 torsin-2A-like [Acanthaster planci] (id=64.98%; len=594; e=0.00E+00) ; XP_022085134.1 torsin-2A-like [Acanthaster planci] (id=64.65%; len=594; e=0.00E+00) ; XP_022085134.1 torsin-2A-like [Acanthaster planci] (id=65.87%; len=589; e=0.00E+00)	QGNQPTSPILMLP; QGNQPTSPILMLP; QGNQPTSPILMLP	3	5.327	0.7387	0.060528	0.99999	3	1	2	3	S27; S27; S27	0.0351037	0.691991	0.342727	0.779227	0.898558	0.482418	0.797003	0.0576293	2-PN	0.0842542	0.142066	0.954861	0.182954	3.2639e-05
PMI_001845; 60730|m.40261; Pmi_649601_CDC5L_BOVIN_Cell_division_cycle_5-like_protein|m.25182	T387; T421; T396	XP_022081761.1 cell division cycle 5-like protein [Acanthaster planci] (id=91.48%; len=810; e=0.00E+00) ; XP_022081761.1 cell division cycle 5-like protein [Acanthaster planci] (id=92.59%; len=810; e=0.00E+00) ; CDC5L_BOVIN_Cell_division_cycle_5-like_protein	SDFDSITPRRAVV; SDFDSITPRRAVV; SDFDSITPRRAVV	2,3	4.908	0.8168	0.517746	1	3	1	2	1	T387; T421; T396	0.0336665	0.891673	0.658186	0.307138	1	0.178603	0.988907	0.000183893	2-PN	0.259161	0.546503	0.920969	0.0557793	0.000926956
Pmi_663160_VMP1_XENTR_Vacuole_membrane_protein_1|m.29312	S90	VMP1_XENTR_Vacuole_membrane_protein_1	SQRGTPSPLETED	3	3.261	0.7197	0.732575	1	1	1	1		S90	0.0476283	0.282023	0.798706	0.836491	0.954798	0.877271	0.981767	0.000495644	2-PN
Pmi_620820_GWL_XENTR_Serine/threonine-protein_kinase_greatwall|m.18617; 15220|m.10062; PMI_004138; 15218|m.10060; 15219|m.10061	S358; S333; S276; S358; S198	GWL_XENTR_Serine/threonine-protein_kinase_greatwall; BAK19788.1 greatwall kinase [Patiria pectinifera] (id=96.66%; len=419; e=0.00E+00) ; BAK19788.1 greatwall kinase [Patiria pectinifera] (id=78.92%; len=816; e=0.00E+00) ; BAK19788.1 greatwall kinase [Patiria pectinifera] (id=96.68%; len=452; e=0.00E+00) ; BAK19788.1 greatwall kinase [Patiria pectinifera] (id=95.83%; len=288; e=0.00E+00)	KEGLIGSGSGQGA; KEGLIGSGSGQGA; KEGLIGSGSGQGA; KEGLIGSGSGQGA; KEGLIGSGSGQGA	2,3	2.854	0.5767	0.802657	1	1	2	3		S358; S333; S276; S358; S198	0.029869	0.430527	0.293136	0.455037	1	0.153125	0.982909	0.00043567	2-PN
PMI_002661; PMI_001922	T1385:S1401; T1225:S1241	XP_022105912.1 condensin-2 complex subunit D3-like [Acanthaster planci] (id=75.55%; len=1648; e=0.00E+00) ; XP_022105912.1 condensin-2 complex subunit D3-like [Acanthaster planci] (id=74.46%; len=1578; e=0.00E+00)	PRIRPATPFTSPQ,GLPAVLSPRAVAN; PRIRPATPFTSPQ,GLPAVLSPRAVAN	3,4	4.71	0.7004	0.587519	1	1	2	1	2	T1385:S1401; T1225:S1241	0.0579111	0.926287	0.230911	0.134408	0.957321	0.137347	0.956081	0.00285093	2-PN	0.195842	0.423928	0.987773	0.0606068	8.77683e-06
PMI_017118; 61852|m.40909; 61854|m.40910; Pmi_647701_NDC1_XENLA_Nucleoporin_NDC1|m.24680	S328; S325; S325; S291	XP_022109750.1 nucleoporin NDC1-like [Acanthaster planci] (id=70.88%; len=546; e=0.00E+00) ; XP_022109750.1 nucleoporin NDC1-like [Acanthaster planci] (id=76.24%; len=543; e=0.00E+00) ; XP_022109750.1 nucleoporin NDC1-like [Acanthaster planci] (id=71.83%; len=387; e=0.00E+00) ; NDC1_XENLA_Nucleoporin_NDC1	GMDPMFSPIQETP; GMDPMFSPIQETP; GMDPMFSPIQETP; GMDPMFSPIQETP	3	3.851	0.8084	0.015371	1	5	3	5		S328; S325; S325; S291	0.0142783	0.140259	0.0783015	0.884824	1	0.130738	0.995782	2.66547e-05	2-PN
Pmi_661510_EPS8_MOUSE_Epidermal_growth_factor_receptor_kinase_substrate_8|m.28796; PMI_008848; 7799|m.4555	S456; S418; S13	EPS8_MOUSE_Epidermal_growth_factor_receptor_kinase_substrate_8; XP_022095018.1 epidermal growth factor receptor kinase substrate 8-like protein 2 isoform X1 [Acanthaster planci] (id=75.58%; len=430; e=8.37E-172) ; XP_022095025.1 epidermal growth factor receptor kinase substrate 8-like protein 2 isoform X2 [Acanthaster planci] (id=90.16%; len=122; e=4.22E-68)	LRDRVPSGSDYSE; LRDRVPSGSDYSE; LRDRVPSGSDYSE	3,4	2.744	0.6549	0.433149	0.99995	1	3	1	1	S456; S418; S13	0.0529554	0.38617	0.961892	0.600879	0.972677	0.479019	0.928735	0.00743709	2-PN	0.119351	0.285617	0.932307	0.0175952	0.00366571
39813|m.27341	S103:T106	XP_022083246.1 77 kDa echinoderm microtubule-associated protein-like isoform X3 [Acanthaster planci] (id=92.71%; len=384; e=0.00E+00)	RTKILLSPATPES,ILLSPATPESQRR	2,3	2.379	0.6294	0.049023	1	9	13	8	8	S103:T106	0.0538284	0.873798	0.720075	0.92066	1	0.628196	0.990778	0.00012717	2-PN	0.15657	0.493199	0.973106	0.00382791	9.0106e-05
64235|m.42600; PMI_027133; PMI_005096	S198; S363; S51	XP_022100089.1 transcription factor 7-like 2 [Acanthaster planci] (id=85.79%; len=197; e=6.79E-106) ; XP_022100089.1 transcription factor 7-like 2 [Acanthaster planci] (id=84.68%; len=372; e=0.00E+00) ; CAJ47350.1 transcription factor [Paracentrotus lividus] (id=41.18%; len=119; e=4.66E-07)	HRERAPSSSSSLS; HRERAPSSSSSLS; HRERAPSSSSSLS	3	1.586	0.57	0.771258	0.99998	1	1	1		S198; S363; S51	0.061111	0.442674	0.713917	0.741577	0.966115	0.789062	0.823758	0.0438546	2-PN
Pmi_663540_S12A6_MOUSE_Solute_carrier_family_12_member_6|m.29398; 29062|m.21166	S68; S50	S12A6_MOUSE_Solute_carrier_family_12_member_6; XP_022110097.1 solute carrier family 12 member 4-like isoform X2 [Acanthaster planci] (id=92.07%; len=454; e=0.00E+00)	GSKAEMSPFMDQE; GSKAEMSPFMDQE	2,3	2.823	0.5489	0.040187	1	2	1	1		S68; S50	0.0877676	0.413815	0.867769	0.892466	0.992522	0.956186	0.982221	0.000471305	2-PN
76864|m.51359; 76866|m.51364; PMI_008691; Pmi_670800_MAST3_XENLA_Microtubule-associated_serine/threonine-prot..CUT|m.31994	S895; S895; S1308; S1063	XP_022087693.1 microtubule-associated serine/threonine-protein kinase 3-like isoform X1 [Acanthaster planci] (id=91.21%; len=944; e=0.00E+00) ; XP_022087693.1 microtubule-associated serine/threonine-protein kinase 3-like isoform X1 [Acanthaster planci] (id=91.31%; len=944; e=0.00E+00) ; XP_022087697.1 microtubule-associated serine/threonine-protein kinase 3-like isoform X2 [Acanthaster planci] (i…	KGKLDRSKTEDNL; KGKLDRSKTEDNL; KGKLDRSKTEDNL; KGKLDRSKTEDNL	3	2.469	0.5941	0.021638	1	2	4	2	1	S895; S895; S1308; S1063	0.142675	0.567905	0.935847	0.882859	1	0.658024	0.995768	2.68306e-05	2-PN	0.403881	0.431006	0.912325	0.704087	0.0193002
76864|m.51359; Pmi_670800_MAST3_XENLA_Microtubule-associated_serine/threonine-prot..CUT|m.31994; PMI_008691; 76866|m.51364	S572:S577; S740:S745; S986:S991; S572:S577	XP_022087693.1 microtubule-associated serine/threonine-protein kinase 3-like isoform X1 [Acanthaster planci] (id=91.21%; len=944; e=0.00E+00) ; MAST3_XENLA_Microtubule-associated_serine/threonine-prot..CUT; XP_022087697.1 microtubule-associated serine/threonine-protein kinase 3-like isoform X2 [Acanthaster planci] (id=85.42%; len=1372; e=0.00E+00) ; XP_022087693.1 microtubule-associated serine/th…	PSLRKGSADQVSP,GSADQVSPLALSG; PSLRKGSADQVSP,GSADQVSPLALSG; PSLRKGSADQVSP,GSADQVSPLALSG; PSLRKGSADQVSP,GSADQVSPLALSG	3	2.295	0.6298	0.680502	1	1	2	1	1	S572:S577; S740:S745; S986:S991; S572:S577	0.0537659	0.22812	0.411119	0.622467	1	0.633916	0.944273	0.00457174	2-PN	0.281129	0.415004	0.941242	0.00579047	0.0014316
45938|m.30796; Pmi_625310_WSDU1_MOUSE_WD_repeat,_SAM_and_U-box_domain-containing_pr..CUT|m.19503; PMI_004306; PMI_010137	T495; T495; T495; T495	XP_022084462.1 WD repeat, SAM and U-box domain-containing protein 1-like [Acanthaster planci] (id=91.38%; len=499; e=0.00E+00) ; WSDU1_MOUSE_WD_repeat,_SAM_and_U-box_domain-containing_pr..CUT; XP_022084462.1 WD repeat, SAM and U-box domain-containing protein 1-like [Acanthaster planci] (id=90.58%; len=499; e=0.00E+00) ; XP_022084462.1 WD repeat, SAM and U-box domain-containing protein 1-like [Aca…	LVHSNLTPNRSLK; LVHSNLTPNRSLK; LVHSNLTPNRSLK; LVHSNLTPNRSLK	3	3.566	0.6618	0.564191	1	1	1	1		T495; T495; T495; T495	0.0831409	0.45673	0.896905	0.684499	0.965325	0.874314	0.913289	0.0109523	2-PN
87799|m.58180	T98	XP_022099388.1 dedicator of cytokinesis protein 3-like isoform X2 [Acanthaster planci] (id=66.15%; len=130; e=2.90E-47)	PIRISTTPTSSAK	2,3	2.635	0.4906	0.117832	0.99797	3	3	3		T98	0.0601981	0.865045	0.768675	0.921315	1	0.828297	0.982315	0.000466371	2-PN
Pmi_648004_no_annot|m.24760; 20907|m.15533	S208; S208	no_annot; XP_022101588.1 uncharacterized protein LOC110985120 [Acanthaster planci] (id=51.78%; len=450; e=4.68E-131)	SRKRKASRQENDI; SRKRKASRQENDI	4,5	2.037	0.4062	0.113455	1	1	3	3	2	S208; S208	0.0679052	0.590751	0.910261	0.882817	0.98807	0.863485	0.978665	0.000677905	2-PN	0.0512774	0.22981	0.992427	0.00479313	5.57335e-08
PMI_003501; PMI_006833; Pmi_661253_VPS11_MOUSE_Vacuolar_protein_sorting-associated_protein_11..CUT|m.28676	T1049; T1049; T920	XP_022091157.1 vacuolar protein sorting-associated protein 11 homolog isoform X1 [Acanthaster planci] (id=86.18%; len=1172; e=0.00E+00) ; XP_022091157.1 vacuolar protein sorting-associated protein 11 homolog isoform X1 [Acanthaster planci] (id=85.84%; len=1172; e=0.00E+00) ; VPS11_MOUSE_Vacuolar_protein_sorting-associated_protein_11..CUT	SSPSRLTPSNPNP; SSPSRLTPSNPNP; SSPSRLTPSNPNP	3	2.645	0.5198	0.26008	1	2	1	1	2	T1049; T1049; T920	0.0673528	0.141004	0.177787	0.657705	1	0.200695	0.997611	8.55659e-06	2-PN	0.201494	0.567764	0.941842	0.00167773	0.00146443
Pmi_527100_no_annot|m.7789; PMI_001625	T83:S85; T535:S537	no_annot; XP_022085278.1 nuclear pore complex protein Nup214-like [Acanthaster planci] (id=58.91%; len=1475; e=0.00E+00)	TNLAPTTPSPGAA,LAPTTPSPGAAPF; TNLAPTTPSPGAA,LAPTTPSPGAAPF	3,4	3.977	0.538	0.048196	0.99999	1	1	2		T83:S85; T535:S537	0.0936014	0.643593	0.684303	0.690678	1	0.556069	0.891787	0.0169315	2-PN
PMI_017675; Pmi_667852_FOXK2_XENLA_Forkhead_box_protein_K2|m.30821	T107; T250	XP_022095446.1 forkhead box protein K2-like isoform X2 [Acanthaster planci] (id=79.19%; len=149; e=8.80E-63) ; FOXK2_XENLA_Forkhead_box_protein_K2	NSRRNITPDLQAA; NSRRNITPDLQAA	3	5.149	0.7412	0.30272	1	1	1	1		T107; T250	0.0418861	0.317883	0.960548	0.76116	0.961194	0.343702	0.986293	0.000280528	2-PN
64565|m.42980; PMI_014626; PMI_027084; PMI_024275; PMI_001528; 34910|m.24452; PMI_015246	T13; T69; T101; T735; T340; T33; T231	XP_023810114.1 zinc finger protein OZF isoform X2 [Oryzias latipes] (id=62.40%; len=125; e=8.15E-45) ; KOF64210.1 hypothetical protein OCBIM_22010741mg, partial [Octopus bimaculoides] (id=51.96%; len=102; e=7.54E-30) ; PNF15467.1 hypothetical protein B7P43_G17073, partial [Cryptotermes secundus] (id=41.67%; len=168; e=6.69E-35) ; XP_014337847.1 PREDICTED: LOW QUALITY PROTEIN: uncharacterized prot…	KHDRVHTGEKPFV; RHERVHTGEKPFV; GRERVHTGEKPFV; LHDRVHTGEKPFV; IHDRVHTGEKPFV; THTRVHTGEKPFV; RHNRVHTGEKPFV	3,4	3.335	0.6003	0.386821	1	2	1	2		T13; T69; T101; T735; T340; T33; T231	0.0488345	0.611029	0.892763	0.499796	1	0.174773	0.967781	0.00154034	2-PN
PMI_026063; Pmi_606870_DUS4_CHICK_Dual_specificity_protein_phosphatase_4|m.16208	T238; T382	XP_022098344.1 dual specificity protein phosphatase 1-like [Acanthaster planci] (id=79.39%; len=330; e=1.15E-176) ; DUS4_CHICK_Dual_specificity_protein_phosphatase_4	PGRDCHTPHDFSR; PGRDCHTPHDFSR	3	1.755	0.641	0.122342	1	2	1	2		T238; T382	0.0473356	0.169326	0.603721	0.645443	1	0.363547	0.946331	0.0042432	2-PN
PMI_007239; PMI_009212; Pmi_643450_CKAP5_MOUSE_Cytoskeleton-associated_protein_5|m.23581	S89; S901; S1303	XP_022089159.1 cytoskeleton-associated protein 5-like isoform X3 [Acanthaster planci] (id=78.26%; len=322; e=6.86E-152) ; XP_022089160.1 cytoskeleton-associated protein 5-like isoform X4 [Acanthaster planci] (id=78.67%; len=1219; e=0.00E+00) ; CKAP5_MOUSE_Cytoskeleton-associated_protein_5	LRSNRLSQGSMSS; LRSNRLSQGSMSS; LRSNRLSQGSMSS	3	4.371	0.7936	0.009951	1	4	6	2		S89; S901; S1303	0.0951948	0.476688	0.936431	0.85508	1	0.36378	0.994589	4.38319e-05	2-PN
10179|m.6177	S60	XP_022109110.1 F-actin-methionine sulfoxide oxidase MICAL3-like isoform X9 [Acanthaster planci] (id=83.58%; len=134; e=3.06E-65)	EEKEALSPDQNAN	2,3,4	5.29	0.7461	0.061772	1	2	2	2	3	S60	0.0742108	0.929576	0.884485	0.716375	0.945372	0.445956	0.873376	0.0230353	2-PN	0.123248	0.230009	0.980421	0.0366437	4.62539e-05
PMI_001752; PMI_026906	S237; S193	XP_022088985.1 serine/threonine-protein kinase MRCK alpha-like [Acanthaster planci] (id=83.23%; len=310; e=2.21E-165) ; XP_022088985.1 serine/threonine-protein kinase MRCK alpha-like [Acanthaster planci] (id=84.44%; len=270; e=1.48E-141)	SSLMPTSPGVPGG; SSLMPTSPGVPGG	3,4	4.403	0.7109	0.170102	0.9945	1	3	3	1	S237; S193	0.238194	0.875516	0.892214	0.73511	0.935468	0.722277	0.814424	0.0484622	2-PN	0.0490023	0.210092	0.954946	0.0668897	0.000588795
21472|m.16144	T6	XP_022097815.1 rho GTPase-activating protein 5-like isoform X22 [Acanthaster planci] (id=70.83%; len=144; e=6.04E-50)	-RAPLATPEKGVF	2,3,4	4.146	0.6301	0.057181	1	4	4	3	2	T6	0.0841391	0.257131	0.230412	0.376778	1	0.555083	0.98096	0.000540314	2-PN	0.334638	0.886156	0.772946	0.00939834	0.00371489
Pmi_608210_SHR2_STRPU_Orphan_steroid_hormone_receptor_2|m.16439	S44	SHR2_STRPU_Orphan_steroid_hormone_receptor_2	PRTPFASPTEEMK	2,3	3.085	0.6652	0.055596	0.99999	2	2	1		S44	0.124294	0.467974	0.832103	0.897871	1	0.415722	0.998113	5.33642e-06	2-PN
PMI_000514	T242	XP_022093769.1 26S proteasome non-ATPase regulatory subunit 1-like [Acanthaster planci] (id=75.56%; len=356; e=1.37E-146)	KDKTEETPTSKEG	3,4	1.989	0.4309	0.331255	0.99999	1	1	1		T242	0.13496	0.278008	0.806983	0.661683	0.910683	0.892294	0.837517	0.0374561	2-PN
78449|m.52629; 78448|m.52627; Pmi_643650_no_annot|m.23658	S66; S66; S83	XP_022093111.1 uncharacterized protein LOC110980590 [Acanthaster planci] (id=71.48%; len=263; e=5.77E-131) ; XP_022093111.1 uncharacterized protein LOC110980590 [Acanthaster planci] (id=77.05%; len=244; e=3.06E-135) ; no_annot	IFVLDNSMRESTV; IFVLDNSMRESTV; IFVLDNSMRESTV	3	3.122	0.6867	0.750714	1	2	2	1		S66; S66; S83	0.0939288	0.453809	0.460911	0.60281	0.898635	0.660247	0.80082	0.055558	2-PN
77660|m.52074; 77667|m.52100; 77666|m.52092; 77652|m.52054; 77661|m.52082	S990:S998; S935:S943; S846:S854; S901:S909; S259:S267	XP_022097945.1 vesicle-associated protein-like, partial [Acanthaster planci] (id=71.09%; len=640; e=0.00E+00) ; XP_022097945.1 vesicle-associated protein-like, partial [Acanthaster planci] (id=71.09%; len=640; e=0.00E+00) ; XP_022097945.1 vesicle-associated protein-like, partial [Acanthaster planci] (id=67.66%; len=535; e=6.52E-175) ; XP_022097945.1 vesicle-associated protein-like, partial [Acant…	GSLDVDSPEYEGK,EYEGKGSGKKKGF; GSLDVDSPEYEGK,EYEGKGSGKKKGF; GSLDVDSPEYEGK,EYEGKGSGKKKGF; GSLDVDSPEYEGK,EYEGKGSGKKKGF; GSLDVDSPEYEGK,EYEGKGSGKKKGF	3,4	5.272	0.7276	0.242885	1	4	4	4	1	S990:S998; S935:S943; S846:S854; S901:S909; S259:S267	0.0662648	0.133006	0.7586	0.711074	1	0.916726	0.966166	0.00169776	2-PN	0.0186068	0.0455862	0.895619	0.149165	0.0112184
PMI_002619; Pmi_636240_NEK11_HUMAN_Serine/threonine-protein_kinase_Nek11|m.21844; PMI_014259	T366; T385; T232	XP_022106639.1 serine/threonine-protein kinase Nek11-like isoform X1 [Acanthaster planci] (id=90.05%; len=422; e=0.00E+00) ; NEK11_HUMAN_Serine/threonine-protein_kinase_Nek11; XP_022106640.1 serine/threonine-protein kinase Nek11-like isoform X2 [Acanthaster planci] (id=84.36%; len=646; e=0.00E+00)	DPYQNLTPKERMR; DPYQNLTPKERMR; DPYQNLTPKERMR	3	4.459	0.6998	0.139511	1	2	2	2	1	T366; T385; T232	0.135556	0.897125	0.789078	0.249573	0.991348	0.201461	0.993368	6.58315e-05	2-PN	0.303623	0.468053	0.925444	0.142722	0.00417201
PMI_009370; 73661|m.49210; Pmi_657130_PKHM1_HUMAN_Pleckstrin_homology_domain-containing_family_..CUT|m.27338	S7; S7; S7	XP_022090170.1 uncharacterized protein LOC110979030 isoform X1 [Acanthaster planci] (id=71.33%; len=607; e=0.00E+00) ; XP_022090178.1 run domain Beclin-1-interacting and cysteine-rich domain-containing protein-like isoform X2 [Acanthaster planci] (id=79.32%; len=382; e=0.00E+00) ; PKHM1_HUMAN_Pleckstrin_homology_domain-containing_family_..CUT	MFGRKGSMDEMEA; MFGRKGSMDEMEA; MFGRKGSMDEMEA	2,3	2.585	0.5932	0.0945	1	4	6	4	4	S7; S7; S7	0.110261	0.359905	0.948399	0.934658	0.958185	0.850896	0.974948	0.000933546	2-PN	0.15381	0.207486	0.988819	0.0193031	4.95922e-07
PMI_003319	S809	XP_022089719.1 disks large-associated protein 5-like [Acanthaster planci] (id=61.53%; len=876; e=0.00E+00)	LLPGLNSPHVHRT	3,4	3.308	0.7406	0.019611	1	1	1	2		S809	0.0954156	0.633569	0.80602	0.402422	0.94868	0.130356	0.894782	0.0160237	2-PN
PMI_001922; PMI_002661	S1229:S1241; S1389:S1401	XP_022105912.1 condensin-2 complex subunit D3-like [Acanthaster planci] (id=74.46%; len=1578; e=0.00E+00) ; XP_022105912.1 condensin-2 complex subunit D3-like [Acanthaster planci] (id=75.55%; len=1648; e=0.00E+00)	PATPFTSPQQGVG,GLPAVLSPRAVAN; PATPFTSPQQGVG,GLPAVLSPRAVAN	3	3.647	0.7314	0.216806	0.99642	2	1	2	1	S1229:S1241; S1389:S1401	0.142914	0.643477	0.615491	0.403976	1	0.258177	0.995513	3.01506e-05	2-PN	0.724136	0.762259	0.926824	0.668154	0.0542453
10179|m.6177	S33:S35	XP_022109110.1 F-actin-methionine sulfoxide oxidase MICAL3-like isoform X9 [Acanthaster planci] (id=83.58%; len=134; e=3.06E-65)	RLVMSRSFSDSFK,VMSRSFSDSFKEI	2	1.746	0.4152	0.023948	1	3	3	3		S33:S35	0.104554	0.358096	0.543218	0.796162	1	0.383615	0.988794	0.000187644	2-PN
Pmi_647680_LBR_RAT_Lamin-B_receptor|m.24675; PMI_019065; 29641|m.21501; PMI_000272	T29; T121; T35; T135	LBR_RAT_Lamin-B_receptor; AIJ01350.1 lamin 2b receptor [Patiria miniata] (id=65.40%; len=422; e=7.64E-127) ; AIJ01350.1 lamin 2b receptor [Patiria miniata] (id=97.53%; len=162; e=5.32E-107) ; AIJ01350.1 lamin 2b receptor [Patiria miniata] (id=92.98%; len=598; e=0.00E+00)	MPKPDLTPTRTPS; MPKPDLTPTRTPS; MPKPDLTPTRTPS; MPKPDLTPTRTPS	2,3,4,5	2.033	0.5978	0.216134	0.99998	3	1	3	7	T29; T121; T35; T135	0.107313	0.382675	0.396772	0.675564	0.894681	0.779263	0.852571	0.0310009	2-PN	0.308154	0.955914	0.500375	0.00200581	0.000192175
50797|m.33905	S563	XP_022107876.1 kinesin light chain-like isoform X10 [Acanthaster planci] (id=96.31%; len=650; e=0.00E+00)	PGSRRESSDSVSY	2,3,5	2.829	0.6002	0.095557	1	3	1	3	1	S563	0.11456	0.468075	0.765618	0.847742	0.93531	0.526471	0.873057	0.0231489	2-PN	0.422669	0.568876	0.874574	0.238419	0.0146874
Pmi_479870_CPSF6_CHICK_Cleavage_and_polyadenylation_specificity_factor..CUT|m.5181	S59	CPSF6_CHICK_Cleavage_and_polyadenylation_specificity_factor..CUT	VSERRFSSGDARP	3,4,5	1.886	0.5619	0.030932	0.99999	4	1	1	7	S59	0.0986556	0.693935	0.940931	0.801866	0.955076	0.859231	0.971713	0.0011889	2-PN	0.118657	0.334509	0.917181	0.00590257	0.00322524
PMI_026273; Pmi_638351_LARP6_MOUSE_La-related_protein_6|m.22327; 75394|m.50329	S479; S479; S526	XP_022105865.1 la-related protein 6-like [Acanthaster planci] (id=85.01%; len=527; e=0.00E+00) ; LARP6_MOUSE_La-related_protein_6; XP_022105865.1 la-related protein 6-like [Acanthaster planci] (id=84.82%; len=527; e=0.00E+00)	AAVPEGSPAGSPL; AAVPEGSPAGSPL; AAVPEGSPAGSPL	2,3,4	4.118	0.7919	0.001067	1	5	4	5	6	S479; S479; S526	0.137502	0.537145	0.45153	0.226033	1	0.12748	0.976265	0.000838318	2-PN	0.174972	0.359463	0.886703	0.00348711	0.00406912
57602|m.38067; Pmi_622880_TCTE1_MACFA_T-complex-associated_testis-expressed_protein_1|m.19014; PMI_028112	S47; S47; S47	XP_022085949.1 T-complex-associated testis-expressed protein 1-like [Acanthaster planci] (id=96.59%; len=498; e=0.00E+00) ; TCTE1_MACFA_T-complex-associated_testis-expressed_protein_1; XP_022085949.1 T-complex-associated testis-expressed protein 1-like [Acanthaster planci] (id=92.17%; len=498; e=0.00E+00)	RSGGRKSLPSPIT; RSGGRKSLPSPIT; RSGGRKSLPSPIT	2	1.438	0.3915	0.734558	1	1	1	1	1	S47; S47; S47	0.142858	0.564402	0.344524	0.907291	1	0.439925	0.988876	0.000184932	2-PN	0.105077	0.983765	0.880509	2.47814e-06	0.000413258
PMI_013206; Pmi_664460_ECT2_HUMAN_Protein_ECT2|m.29665; PMI_013002; 18610|m.13165	T321; T321; T321; T321	XP_022098002.1 protein ECT2-like [Acanthaster planci] (id=77.27%; len=893; e=0.00E+00) ; ECT2_HUMAN_Protein_ECT2; XP_022098002.1 protein ECT2-like [Acanthaster planci] (id=86.70%; len=865; e=0.00E+00) ; XP_022098002.1 protein ECT2-like [Acanthaster planci] (id=80.86%; len=371; e=0.00E+00)	LNTPGNTPVVRTS; LNTPGNTPVVRTS; LNTPGNTPVVRTS; LNTPGNTPVVRTS	3	4.159	0.6129	1.52255	1	1	1	1	1	T321; T321; T321; T321	0.141261	0.834157	0.901327	0.517907	1	0.480003	0.968418	0.00148038	2-PN	0.546728	0.91638	0.541075	0.015758	0.813983
Pmi_611880_LARP7_HUMAN_La-related_protein_7|m.17032; PMI_003479	S430; S299	LARP7_HUMAN_La-related_protein_7; XP_022091380.1 la-related protein 7-like [Acanthaster planci] (id=66.59%; len=467; e=0.00E+00)	KRRRTESEMMEEE; KRRRTESEMMEEE	2,3,4,5	3.778	0.7236	0.061511	1	15	20	14	25	S430; S299	0.150187	0.917581	0.954449	0.928314	0.989352	0.97157	0.976161	0.000845642	2-PN	0.130036	0.283156	0.997384	0.000118726	2.92446e-06
PMI_020893; Pmi_649832_FTM_HUMAN_Protein_fantom|m.25232	S432; S997	XP_022097495.1 protein fantom-like [Acanthaster planci] (id=83.67%; len=741; e=0.00E+00) ; FTM_HUMAN_Protein_fantom	PRPRTSSQPLEPT; PRPRTSSQPLEPT	2	2.26	0.711	0.207406	1	2	2	2		S432; S997	0.139358	0.739212	0.937514	0.941577	0.980175	0.4222	0.97056	0.00128729	2-PN
Pmi_616652_QN1_HUMAN_Protein_QN1_homolog|m.17862	S665	QN1_HUMAN_Protein_QN1_homolog	PIQPRKSAEEPLL	3	1.797	0.6551	0.176094	1	1	2	2		S665	0.0959618	0.287716	0.84424	0.950982	0.977952	0.952237	0.979239	0.00064207	2-PN
32253|m.23029; 32250|m.23026; 32249|m.23024; 32243|m.23022; 32240|m.23020	T93; T100; T70; T100; T93	XP_022089719.1 disks large-associated protein 5-like [Acanthaster planci] (id=44.34%; len=336; e=3.33E-57) ; XP_022089719.1 disks large-associated protein 5-like [Acanthaster planci] (id=46.20%; len=316; e=3.36E-57) ; XP_022089719.1 disks large-associated protein 5-like [Acanthaster planci] (id=43.10%; len=290; e=1.04E-44) ; XP_022089719.1 disks large-associated protein 5-like [Acanthaster planci…	TPIKLATPCRTDA; TPIKLATPCRTDA; TPIKLATPCRTDA; TPIKLATPCRTDA; TPIKLATPCRTDA	3,4	3.692	0.6324	0.049594	0.99995	2	1	1		T93; T100; T70; T100; T93	0.152401	0.70509	0.414096	0.702337	0.985424	0.475838	0.829308	0.0412168	2-PN
80701|m.54256; Pmi_667852_FOXK2_XENLA_Forkhead_box_protein_K2|m.30821	S28; S403	XP_022095445.1 forkhead box protein K2-like isoform X1 [Acanthaster planci] (id=75.29%; len=174; e=1.67E-63) ; FOXK2_XENLA_Forkhead_box_protein_K2	SRSAPASPSHTVQ; SRSAPASPSHTVQ	3	5.218	0.7798	0.185549	0.99453	3	3	2	4	S28; S403	0.487363	0.479128	0.616206	0.778232	0.963438	0.736554	0.811056	0.0501773	2-PN	0.827508	0.760927	0.353912	0.572598	0.034553
61747|m.40810; PMI_020640	S521; S690	XP_022095718.1 serine/threonine-protein kinase VRK1-like [Acanthaster planci] (id=75.63%; len=517; e=0.00E+00) ; XP_022095718.1 serine/threonine-protein kinase VRK1-like [Acanthaster planci] (id=76.52%; len=460; e=0.00E+00)	TSYTQTSPGVKQT; TSYTQTSPGVKQT	2,3,4,5	5.343	0.7272	0.047629	1	12	11	14	8	S521; S690	0.225302	0.767123	0.967676	0.85856	0.974547	0.906973	0.864047	0.0264682	2-PN	0.876601	0.900671	0.435321	0.740229	0.01494
PMI_028166; Pmi_605291_no_annot|m.15954	S316; S163	XP_022086836.1 uncharacterized protein LOC110977222 isoform X3 [Acanthaster planci] (id=65.47%; len=1254; e=0.00E+00) ; no_annot	RATTRMSPSPTPS; RATTRMSPSPTPS	3	1.112	0.4421	0.410879	0.99999	1	1	1		S316; S163	0.186218	0.943235	0.917733	0.635748	0.983133	0.717911	0.95903	0.00248341	2-PN
Pmi_618820_DUS16_HUMAN_Dual_specificity_protein_phosphatase_16|m.18259; PMI_003802	S427; S404	DUS16_HUMAN_Dual_specificity_protein_phosphatase_16; XP_022079173.1 uncharacterized protein LOC110973046 isoform X5 [Acanthaster planci] (id=77.32%; len=917; e=0.00E+00)	GPIFLGSPPSSES; GPIFLGSPPSSES	2,3,4	2.564	0.6182	0.258206	1	2	2	1	4	S427; S404	0.183803	0.731851	0.774491	0.931996	0.947883	0.668551	0.949333	0.00378564	2-PN	0.718165	0.893692	0.665964	0.145227	0.604379
Pmi_457221_TBD2B_MOUSE_TBC1_domain_family_member_2B|m.4278; PMI_000421	S89; S34	TBD2B_MOUSE_TBC1_domain_family_member_2B; XP_022094216.1 TBC1 domain family member 2B-like [Acanthaster planci] (id=72.20%; len=331; e=1.89E-156)	KTPKRGSDYSVAE; KTPKRGSDYSVAE	2,3	4.162	0.7564	0.33196	1	1	2	1	2	S89; S34	0.183146	0.439081	0.775511	0.734824	0.969414	0.916683	0.977536	0.000751257	2-PN	0.360438	0.332663	0.920338	0.403904	0.00411665
Pmi_605291_no_annot|m.15954; PMI_028166	S692; S845	no_annot; XP_022086836.1 uncharacterized protein LOC110977222 isoform X3 [Acanthaster planci] (id=65.47%; len=1254; e=0.00E+00)	FLKDMKSPTSQAS; FLKDMKSPTSQAS	3	1.62	0.3733	0.053902	0.99999	1	1	1	2	S692; S845	0.191785	0.69624	0.825823	0.844071	1	0.932485	0.987141	0.000246984	2-PN	0.351585	0.393709	0.838137	0.555101	0.010559
PMI_009133	S301	XP_022082492.1 AT-rich interactive domain-containing protein 1B-like isoform X6 [Acanthaster planci] (id=84.31%; len=1638; e=0.00E+00)	ESAPSPSPSLLNK	3	3.489	0.5976	0.23806	1	2	1	2	1	S301	0.191925	0.734575	0.938515	0.875932	1	0.670378	0.971539	0.00120351	2-PN	0.522811	0.604836	0.904816	0.418357	0.0168959
Pmi_669840_SRBS2_RAT_Sorbin_and_SH3_domain-containing_protein_2|m.31746; PMI_015925	T750; T813	SRBS2_RAT_Sorbin_and_SH3_domain-containing_protein_2; XP_022081541.1 uncharacterized protein LOC110973912 isoform X9 [Acanthaster planci] (id=68.14%; len=587; e=0.00E+00)	ERLGIKTPPPKRT; ERLGIKTPPPKRT	2,3,4	1.547	0.4094	0.247593	1	2	2	2	10	T750; T813	0.251917	0.72956	0.867804	0.681576	1	0.821854	0.9703	0.00131006	2-PN	0.370287	0.527955	0.972333	0.00644158	0.000231678
Pmi_595650_LNPB_FUGRU_Protein_lunapark-B|m.14554; PMI_013617; PMI_010214	T182; T121; T182	LNPB_FUGRU_Protein_lunapark-B; XP_022105550.1 protein lunapark-B-like isoform X1 [Acanthaster planci] (id=60.97%; len=392; e=1.90E-124) ; XP_022105552.1 protein lunapark-B-like isoform X2 [Acanthaster planci] (id=81.68%; len=404; e=0.00E+00)	GTRTPNTPPQGPQ; GTRTPNTPPQGPQ; GTRTPNTPPQGPQ	2,3	2.871	0.637	0.11021	1	6	3	3		T182; T121; T182	0.246074	0.361199	0.139655	0.788077	1	0.259887	0.991713	0.000102739	2-PN
PMI_002487; PMI_000864; Pmi_670720_PRKDC_XENLA_DNA-dependent_protein_kinase_catalytic_subunit|m.31984	T2441; T2256; T925	XP_022110986.1 DNA-dependent protein kinase catalytic subunit-like isoform X3 [Acanthaster planci] (id=76.77%; len=2824; e=0.00E+00) ; XP_022110986.1 DNA-dependent protein kinase catalytic subunit-like isoform X3 [Acanthaster planci] (id=78.58%; len=3118; e=0.00E+00) ; PRKDC_XENLA_DNA-dependent_protein_kinase_catalytic_subunit	RGEIRATQEGHQF; RGEIRATQEGHQF; RGEIRATQEGHQF	3	5.424	0.7679	0.114146	1	1	1	1		T2441; T2256; T925	0.203336	0.790323	0.491394	0.377335	0.983979	0.619842	0.859426	0.0282525	2-PN
Pmi_580910_TM1L2_HUMAN_TOM1-like_protein_2|m.12625; 9256|m.5544; 9255|m.5542	T146; T146; T146	TM1L2_HUMAN_TOM1-like_protein_2; XP_022092307.1 TOM1-like protein 2 isoform X4 [Acanthaster planci] (id=83.18%; len=214; e=1.10E-124) ; XP_022092307.1 TOM1-like protein 2 isoform X4 [Acanthaster planci] (id=81.65%; len=218; e=1.22E-123)	VTPQRATPEVDPA; VTPQRATPEVDPA; VTPQRATPEVDPA	2,3,4,5	6.69	0.7568	0.039555	1	9	9	10		T146; T146; T146	0.238409	0.511365	0.900373	0.973189	0.979706	0.949128	0.989523	0.000164073	2-PN
Pmi_642790_NU133_MOUSE_Nuclear_pore_complex_protein_Nup133|m.23409; PMI_014907; PMI_013270	S56; S70; S56	NU133_MOUSE_Nuclear_pore_complex_protein_Nup133; XP_022083152.1 nuclear pore complex protein Nup133-like isoform X1 [Acanthaster planci] (id=81.42%; len=323; e=1.96E-168) ; XP_022083152.1 nuclear pore complex protein Nup133-like isoform X1 [Acanthaster planci] (id=82.62%; len=305; e=1.45E-158)	SGAGTRSPAVGNR; SGAGTRSPAVGNR; SGAGTRSPAVGNR	3,4	3.22	0.6661	0.201093	0.99999	2	2	2	2	S56; S70; S56	0.306581	0.421076	0.724236	0.450469	1	0.345543	0.972923	0.0010898	2-PN	0.524677	0.647085	0.930084	0.0702287	0.00263762
Pmi_595800_SOCS6_PONAB_Suppressor_of_cytokine_signaling_6|m.14569; PMI_019588	S106; S106	SOCS6_PONAB_Suppressor_of_cytokine_signaling_6; XP_022080223.1 uncharacterized protein LOC110973609 [Acanthaster planci] (id=69.03%; len=536; e=0.00E+00)	PFSRRRSEDNGSV; PFSRRRSEDNGSV	2,3,4	2.355	0.6222	0.211624	1	2	3	2	4	S106; S106	0.316283	0.719093	0.791314	0.95197	0.955092	0.932479	0.952978	0.00326461	2-PN	0.532018	0.557683	0.977418	0.597183	0.00212873
Pmi_648790_CDAN1_MOUSE_Codanin-1|m.24943	S536	CDAN1_MOUSE_Codanin-1	VVMTSKSPVQAVP	3,4	2.791	0.6582	0.025889	1	1	1	3		S536	0.27005	0.682553	0.921544	0.842692	1	0.943443	0.96522	0.00179339	2-PN
25208|m.19005; PMI_013390	S582; S705	XP_022099200.1 uncharacterized protein LOC110983880 isoform X1 [Acanthaster planci] (id=61.70%; len=765; e=0.00E+00) ; XP_022099200.1 uncharacterized protein LOC110983880 isoform X1 [Acanthaster planci] (id=56.98%; len=5060; e=0.00E+00)	RKPQLASPVLQEV; RKPQLASPVLQEV	2,3,4	3.092	0.5474	0.228018	1	2	1	1	1	S582; S705	0.356929	0.539631	0.884929	0.62896	1	0.655587	0.975258	0.000910708	2-PN	0.948805	0.899924	0.847661	0.573062	0.139379
Pmi_649130_TXB1A_DANRE_Tax1-binding_protein_1_homolog_A|m.25062; PMI_022353	S43; S564	TXB1A_DANRE_Tax1-binding_protein_1_homolog_A; XP_022087081.1 tax1-binding protein 1-like isoform X2 [Acanthaster planci] (id=76.42%; len=878; e=0.00E+00)	QRVRASSRDESPA; QRVRASSRDESPA	2,3,4	2.28	0.5083	0.196584	0.99782	2	1	3	1	S43; S564	0.358535	0.757553	0.806689	0.827225	0.894261	0.881635	0.953025	0.00325813	2-PN	0.832671	0.914717	0.836958	0.191275	0.90039
PMI_005722	S316	XP_022105313.1 codanin-1-like [Acanthaster planci] (id=54.46%; len=1021; e=0.00E+00)	VVMTSKSPVQAVP	3	2.791	0.6582	0.518182	1	1	1	2		S316	0.289059	0.68075	0.915854	0.843338	1	0.91378	0.978757	0.000672121	2-PN
Pmi_669840_SRBS2_RAT_Sorbin_and_SH3_domain-containing_protein_2|m.31746; PMI_015925	S715; S778	SRBS2_RAT_Sorbin_and_SH3_domain-containing_protein_2; XP_022081541.1 uncharacterized protein LOC110973912 isoform X9 [Acanthaster planci] (id=68.14%; len=587; e=0.00E+00)	QEEPIRSPSSRPL; QEEPIRSPSSRPL	3,4	2.412	0.5952	0.168265	0.99972	3	1	3	5	S715; S778	0.380291	0.947408	0.875098	0.836068	0.959519	0.789662	0.882351	0.0199477	2-PN	0.770988	0.797289	0.965809	0.61241	0.00151085
Pmi_621360_RPP30_BOVIN_Ribonuclease_P_protein_subunit_p30|m.18712; PMI_013967	S341; S200	RPP30_BOVIN_Ribonuclease_P_protein_subunit_p30; XP_022098367.1 ribonuclease P protein subunit p30-like [Acanthaster planci] (id=74.07%; len=216; e=4.05E-111)	KSKRANSVDEHSA; KSKRANSVDEHSA	3	1.858	0.6074	0.022635	1	4	4	4		S341; S200	0.320598	0.880737	0.963859	0.935366	0.964032	0.953782	0.93409	0.006373	2-PN
PMI_006629; PMI_020148; Pmi_662723_CSK21_XENLA_Casein_kinase_II_subunit_alpha|m.29160	S288; S342; S388	XP_022096126.1 casein kinase II subunit alpha [Acanthaster planci] (id=70.13%; len=375; e=1.73E-173) ; XP_022096126.1 casein kinase II subunit alpha [Acanthaster planci] (id=86.58%; len=395; e=0.00E+00) ; CSK21_XENLA_Casein_kinase_II_subunit_alpha	QPIQNASPAAAVV; QPIQNASPAAAVV; QPIQNASPAAAVV	3,4,5	4.155	0.6611	0.187155	1	7	4	4		S288; S342; S388	0.428568	0.415904	0.282004	0.977087	0.992003	0.729756	0.984993	0.000336105	2-PN
Pmi_664452_HELLS_HUMAN_Lymphoid-specific_helicase|m.29705; 58054|m.38403	S45; S45	HELLS_HUMAN_Lymphoid-specific_helicase; XP_022104139.1 lymphocyte-specific helicase-like [Acanthaster planci] (id=84.02%; len=388; e=0.00E+00)	TPEVAASPIGTSR; TPEVAASPIGTSR	3,4	3.118	0.6216	0.176072	1	1	1	3	2	S45; S45	0.52092	0.889901	0.913493	0.374289	1	0.698932	0.961769	0.00216448	2-PN	0.599321	0.759217	0.399327	0.40239	0.03715
Pmi_669840_SRBS2_RAT_Sorbin_and_SH3_domain-containing_protein_2|m.31746; PMI_015925	S285; S402	SRBS2_RAT_Sorbin_and_SH3_domain-containing_protein_2; XP_022081541.1 uncharacterized protein LOC110973912 isoform X9 [Acanthaster planci] (id=68.14%; len=587; e=0.00E+00)	KSPAAWSPASAAP; KSPAAWSPASAAP	2,3	3.95	0.6763	0.063163	1	2	2	4	2	S285; S402	0.550474	0.54559	0.57306	0.749423	1	0.694475	0.960913	0.00226184	2-PN	0.682469	0.804701	0.947956	0.040687	0.0110648
PMI_004703	S198	XP_022090395.1 LOW QUALITY PROTEIN: nuclear pore complex protein Nup153-like [Acanthaster planci] (id=66.62%; len=701; e=0.00E+00)	EMGHRRSPMPSSG	2,3	2.932	0.6713	0.074395	1	2	1	4		S198	0.574587	0.744167	0.829363	0.656219	0.940716	0.541964	0.947562	0.0040525	2-PN
PMI_013462	T311	XP_022097969.1 uncharacterized protein LOC110983210 isoform X2 [Acanthaster planci] (id=85.84%; len=339; e=0.00E+00)	KGRRSATPVSVTK	2,3	2.195	0.6096	0.001023	1	2	2	1	3	T311	0.679156	0.678442	0.511426	0.423784	1	0.754084	0.958633	0.00253142	2-PN	0.969861	0.866751	0.237781	0.208847	2.02473e-05
PMI_001922; PMI_002661	S1241; S1401	XP_022105912.1 condensin-2 complex subunit D3-like [Acanthaster planci] (id=74.46%; len=1578; e=0.00E+00) ; XP_022105912.1 condensin-2 complex subunit D3-like [Acanthaster planci] (id=75.55%; len=1648; e=0.00E+00)	GLPAVLSPRAVAN; GLPAVLSPRAVAN	3	3.012	0.7595	0.039882	1	1	1	1	1	S1241; S1401	0.557829	0.183518	0.125046	0.291553	1	0.274589	0.995499	3.03418e-05	2-PN	0.859187	0.869231	0.68604	0.921241	0.118986
Pmi_450740_ASAP1_BOVIN_Arf-GAP_with_SH3_domain,_ANK_repeat_and_PH_domai..CUT|m.4100	S6	ASAP1_BOVIN_Arf-GAP_with_SH3_domain,_ANK_repeat_and_PH_domai..CUT	-RGNKASPTRPSS	3,4	1.327	0.5196	0.158743	0.99997	2	5	7		S6	0.584066	0.956833	0.949034	0.8304	0.963176	0.710876	0.857633	0.0289598	2-PN
36279|m.25260; PMI_019420	S133; S394	XP_022097969.1 uncharacterized protein LOC110983210 isoform X2 [Acanthaster planci] (id=86.06%; len=545; e=0.00E+00) ; XP_022097969.1 uncharacterized protein LOC110983210 isoform X2 [Acanthaster planci] (id=63.41%; len=686; e=0.00E+00)	EDSGRDSPSQRSR; EDSGRDSPSQRSR	3,4	1.927	0.549	0.14957	0.99994	2	1	1	2	S133; S394	0.671448	0.541593	0.237931	0.38182	1	0.44636	0.913786	0.0108288	2-PN	0.865975	0.892292	0.571722	0.696302	0.00219036
72920|m.48749; 72923|m.48754; 72917|m.48745	S211; S211; S210	XP_022096190.1 HIRA-interacting protein 3-like isoform X1 [Acanthaster planci] (id=40.98%; len=183; e=7.00E-03) ; XP_022096192.1 HIRA-interacting protein 3-like isoform X3 [Acanthaster planci] (id=48.00%; len=225; e=1.29E-37) ; XP_022096190.1 HIRA-interacting protein 3-like isoform X1 [Acanthaster planci] (id=35.90%; len=195; e=3.00E-03)	PLASTVSPKT---; PLASTVSPKTLVK; PLASTVSPKT---	2,3	3.007	0.6265	0.104964	1	1	2	2	2	S211; S211; S210	0.699026	0.693673	0.934005	0.514939	1	0.793879	0.964475	0.0018706	2-PN	0.735541	0.920253	0.678592	0.0467443	0.00393759
Pmi_580670_DC1L2_PONAB_Cytoplasmic_dynein_1_light_intermediate_chain_2|m.12609; PMI_003375; 14304|m.9280	S447; S367; S97	DC1L2_PONAB_Cytoplasmic_dynein_1_light_intermediate_chain_2; XP_022083930.1 cytoplasmic dynein 1 light intermediate chain 1-like isoform X2 [Acanthaster planci] (id=94.97%; len=398; e=0.00E+00) ; XP_022083930.1 cytoplasmic dynein 1 light intermediate chain 1-like isoform X2 [Acanthaster planci] (id=97.34%; len=113; e=3.10E-68)	SPGSPASPKPGDK; SPGSPASPKPGDK; SPGSPASPKPGDK	2,3,4,5	3.795	0.6875	0.115942	1	4	1	1	7	S447; S367; S97	0.631975	0.232536	0.105126	0.493458	1	0.724709	0.956335	0.00281828	2-PN	0.748729	0.901074	0.571722	0.0771898	0.00473307
Pmi_614011_MILK1_HUMAN_MICAL-like_protein_1|m.17350; 62257|m.41154; PMI_021667	S606; S27; S747	MILK1_HUMAN_MICAL-like_protein_1; XP_022080532.1 MICAL-like protein 1 isoform X1 [Acanthaster planci] (id=82.53%; len=229; e=4.83E-116) ; XP_022080532.1 MICAL-like protein 1 isoform X1 [Acanthaster planci] (id=76.55%; len=998; e=0.00E+00)	ATKPVPSPRLKKH; ATKPVPSPRLKKH; ATKPVPSPRLKKH	2,4	2.307	0.6945	0.029144	1	2	2	2	2	S606; S27; S747	0.850164	0.470444	0.954181	0.833117	0.97706	0.817794	0.964353	0.00188338	2-PN	0.670731	0.869782	0.909914	0.000667297	0.0260132
Pmi_634260_MYPH_ECHGR_Myophilin|m.21396	S90	MYPH_ECHGR_Myophilin	NIGKFLSFTEEYG	3	4.237	0.6519	0.09709	0.99914	1	1	1		S90	0.755386	0.331288	0.49285	0.603794	0.844569	0.698009	0.882436	0.0199193	2-PN
60578|m.40066; Pmi_618510_TRPC4_MOUSE_Short_transient_receptor_potential_channel_4|m.18200	S239; S592	XP_022106065.1 transient-receptor-potential-like protein isoform X1 [Acanthaster planci] (id=32.61%; len=647; e=2.02E-45) ; TRPC4_MOUSE_Short_transient_receptor_potential_channel_4	SEQQMASPAQQVD; SEQQMASPAQQVD	3	4.314	0.6651	0.195422	1	2	1	1	1	S239; S592	0.0200045	0.623759	0.961977	0.790386	0.987021	0.915032	0.983514	0.000405456	2-PN	0.108084	0.136893	0.968579	0.0254017	0.00017955
PMI_026995; Pmi_616010_YES_CHICK_Tyrosine-protein_kinase_Yes|m.17698	S21:S26; S21:S26	AAS01045.1 Src family tyrosine kinase [Patiria miniata] (id=99.63%; len=268; e=0.00E+00) ; YES_CHICK_Tyrosine-protein_kinase_Yes	ADTRNDSNDMGSP,DSNDMGSPGMKIT; ADTRNDSNDMGSP,DSNDMGSPGMKIT	2,3	2.055	0.5562	0.017669	1	4		1	1	S21:S26; S21:S26	0.0395221	0.687845	0.814958	0.894167	0.912861	0.844243	0.83861	0.0369682	2-PN	0.151024	0.183662	0.975521	0.185095	5.58949e-06
PMI_030396	S223:S224	XP_022110088.1 lariat debranching enzyme A-like [Acanthaster planci] (id=77.21%; len=272; e=9.44E-130)	RNLEIYSSQEEDS,NLEIYSSQEEDSP	3	4.544	0.7172	0.179566	0.99468	1		1		S223:S224	0.13842	0.480851	0.86008	0.793973	1	0.714082	0.888625	0.0179157	2-PN
20386|m.14944; Pmi_646162_LYST_MOUSE_Lysosomal-trafficking_regulator|m.24291; PMI_004367	T208; T558; T2339	XP_022110934.1 lysosomal-trafficking regulator-like [Acanthaster planci] (id=63.37%; len=404; e=6.90E-153) ; LYST_MOUSE_Lysosomal-trafficking_regulator; XP_022110934.1 lysosomal-trafficking regulator-like [Acanthaster planci] (id=75.87%; len=3920; e=0.00E+00)	NGGMQETPPSVVK; NGGMQETPPSVVK; NGGMQETPPSVVK	3	2.504	0.6689	1.70936	1		1	1		T208; T558; T2339	0	0.52355	0.910344	0.374337	0.958811	0.712753	0.941202	0.00508412	2-PN
PMI_006773; Pmi_650720_PO210_RAT_Nuclear_pore_membrane_glycoprotein_210|m.25458; PMI_019692	S1005:S1021; S1065:S1081; S953:S969	XP_022099451.1 nuclear pore membrane glycoprotein 210-like isoform X1 [Acanthaster planci] (id=85.05%; len=883; e=0.00E+00) ; PO210_RAT_Nuclear_pore_membrane_glycoprotein_210; XP_022099452.1 nuclear pore membrane glycoprotein 210-like isoform X2 [Acanthaster planci] (id=76.99%; len=943; e=0.00E+00)	STQQQRSPTKLWS,SPQEGTSPQY---; STQQQRSPTKLWS,SPQEGTSPQY---; STQQQRSPTKLWS,SPQEGTSPQY---	3	3.24	0.3574	0.277335	0.98448		2	1		S1005:S1021; S1065:S1081; S953:S969	0.0161801	0.253547	0.226404	0.367254	1	0.447898	0.974767	0.00094706	2-PN
Pmi_657090_HLTF_HUMAN_Helicase-like_transcription_factor|m.27353; 75171|m.50210; PMI_007068	S521; S521; S54	HLTF_HUMAN_Helicase-like_transcription_factor; XP_022079881.1 helicase-like transcription factor isoform X1 [Acanthaster planci] (id=76.82%; len=1156; e=0.00E+00) ; XP_022079885.1 helicase-like transcription factor isoform X2 [Acanthaster planci] (id=69.96%; len=789; e=0.00E+00)	VRTPRASQKGDEE; VRTPRASQKGDEE; VRTPRASQKGDEE	3	1.844	0.6258	0.212205	1	1		1		S521; S521; S54	0.0410601	0.208083	0.667893	0.817842	1	0.396294	0.988137	0.000210267	2-PN
PMI_001913; 33088|m.23538	S466; S455	XP_022092208.1 protein tilB homolog [Acanthaster planci] (id=84.12%; len=466; e=0.00E+00) ; XP_022092208.1 protein tilB homolog [Acanthaster planci] (id=85.08%; len=469; e=0.00E+00)	AVDRPNSQDFVDD; AVDRPNSQDFVDD	3	1.815	0.6293	0.052761	1		1	1		S466; S455	0.0325176	0.109556	0.812656	0.90692	1	0.950327	0.995736	2.72333e-05	2-PN
Pmi_625146_SNF8_DANRE_Vacuolar-sorting_protein_SNF8|m.19531	S152:S156:S159	SNF8_DANRE_Vacuolar-sorting_protein_SNF8	EGYAPRSPLRSPN,PRSPLRSPNSPMR,PLRSPNSPMRSAK	2,3	1.687	0.5384	0.149638	1	5		3		S152:S156:S159	0.0828616	0.422726	0.91614	0.839489	0.954965	0.899122	0.944003	0.0046157	2-PN
68305|m.45564; Pmi_661270_KI67_HUMAN_Antigen_KI-67|m.29501; 68293|m.45529; 68308|m.45566	T225; T1269; T220; T220	XP_022080667.1 nascent polypeptide-associated complex subunit alpha, muscle-specific form-like [Acanthaster planci] (id=81.82%; len=198; e=4.93E-93) ; KI67_HUMAN_Antigen_KI-67; XP_022080667.1 nascent polypeptide-associated complex subunit alpha, muscle-specific form-like [Acanthaster planci] (id=69.87%; len=468; e=1.45E-170) ; XP_022080667.1 nascent polypeptide-associated complex subunit alpha, m…	TPAEEKTPKFSG-; TPAEEKTPKFSGI; TPAEEKTPKFSGM; TPAEEKTPKFSGM	2,3	1.279	0.4369	0.095238	1	2		1		T225; T1269; T220; T220	0.0275511	0.797562	0.720078	0.457648	1	0.275717	0.998387	3.9015e-06	2-PN
58254|m.38606; Pmi_647530_WEE1_RAT_Wee1-like_protein_kinase|m.24646; PMI_003099; PMI_000709	S89; S430; S430; S813	BAB83502.1 Wee1 [Patiria pectinifera] (id=94.01%; len=284; e=0.00E+00) ; WEE1_RAT_Wee1-like_protein_kinase; BAB83502.1 Wee1 [Patiria pectinifera] (id=92.38%; len=630; e=0.00E+00) ; BAB83502.1 Wee1 [Patiria pectinifera] (id=90.86%; len=624; e=0.00E+00)	IVNGDPSSPRDGY; IVNGDPSSPRDGY; IVNGDPSSPRDGY; IVNGDPSSPRDGY	2	1.423	0.5805	0.368736	0.99999	1		1		S89; S430; S430; S813	0.0564321	0.225017	0.609865	0.544106	1	0.678872	0.984525	0.00035737	2-PN
Pmi_606870_DUS4_CHICK_Dual_specificity_protein_phosphatase_4|m.16208; PMI_026063	S404; S260	DUS4_CHICK_Dual_specificity_protein_phosphatase_4; XP_022098344.1 dual specificity protein phosphatase 1-like [Acanthaster planci] (id=79.39%; len=330; e=1.15E-176)	RRTRSASLPCLVH; RRTRSASLPCLVH	3,4	2.034	0.6549	0.818066	0.99998		1	1		S404; S260	0.0964178	0.176662	0.50416	0.46752	1	0.751704	0.928069	0.00757501	2-PN
36551|m.25362; 36544|m.25355; Pmi_628421_RBP2_HUMAN_E3_SUMO-protein_ligase_RanBP2|m.20162	S201; S201; S496	XP_022088005.1 E3 SUMO-protein ligase RanBP2-like isoform X2 [Acanthaster planci] (id=74.30%; len=214; e=7.72E-97) ; XP_022088005.1 E3 SUMO-protein ligase RanBP2-like isoform X2 [Acanthaster planci] (id=71.08%; len=249; e=3.20E-103) ; RBP2_HUMAN_E3_SUMO-protein_ligase_RanBP2	AGSKDDSVSEERD; AGSKDDSVSEERD; AGSKDDSVSEERD	3	3.156	0.5861	0.441666	0.99999	1		2		S201; S201; S496	0.0406504	0.740316	0.888573	0.823075	0.934758	0.869625	0.851828	0.0313057	2-PN
Pmi_661771_RGPA1_MOUSE_Ral_GTPase-activating_protein_subunit_alpha-1|m.28838; PMI_013610	S1561; S158	RGPA1_MOUSE_Ral_GTPase-activating_protein_subunit_alpha-1; XP_022083005.1 ral GTPase-activating protein subunit alpha-1-like isoform X2 [Acanthaster planci] (id=80.93%; len=215; e=3.23E-96)	QIPRPVSGSMDEK; QIPRPVSGSMDEK	3,4	4.612	0.7344	0.222562	0.98832	1		2	1	S1561; S158	0.102029	0.325545	0.922807	0.953136	0.983656	0.666744	0.992767	7.82868e-05	2-PN	0.0580221	0.122552	0.917208	0.0567564	0.00283947
Pmi_610220_GSH0_RAT_Glutamate--cysteine_ligase_regulatory_subunit|m.16756; PMI_001148; PMI_014951	T85; T85; T85	GSH0_RAT_Glutamate--cysteine_ligase_regulatory_subunit; XP_022085299.1 glutamate--cysteine ligase regulatory subunit-like isoform X2 [Acanthaster planci] (id=76.05%; len=309; e=1.22E-167) ; XP_022085299.1 glutamate--cysteine ligase regulatory subunit-like isoform X2 [Acanthaster planci] (id=84.36%; len=275; e=3.35E-174)	EYSGCVTPDEVKI; EYSGCVTPDEVKI; EYSGCVTPDEVKI	3	2.645	0.5361	0.502519	1		1	1		T85; T85; T85	0.042382	0.259495	0.955981	0.842911	0.966023	0.806158	0.964326	0.00188628	2-PN
Pmi_666820_ITSN1_XENLA_Intersectin-1|m.30459; PMI_004225	S620; S133	ITSN1_XENLA_Intersectin-1; XP_022081646.1 intersectin-1-like isoform X1 [Acanthaster planci] (id=86.72%; len=1107; e=0.00E+00)	ANQPAPSPTPTPG; ANQPAPSPTPTPG	4	1.376	0.3365	1.89943	0.98283		1	1		S620; S133	0.0807551	0.357352	0.552593	0.108431	1	0.522045	0.977326	0.000765336	2-PN
Pmi_586150_no_annot|m.13291	S204	no_annot	SDISSLSPSAPYV	2,3	2.739	0.6378	0.35737	1	1		2		S204	0.051368	0.634844	0.879508	0.873894	0.883227	0.769753	0.862105	0.0272114	2-PN
Pmi_667870_UBF1_HUMAN_Nucleolar_transcription_factor_1|m.30869; PMI_020223	S14; S253	UBF1_HUMAN_Nucleolar_transcription_factor_1; XP_022091128.1 nucleolar transcription factor 1-like isoform X2 [Acanthaster planci] (id=82.65%; len=438; e=0.00E+00)	RGKKRVSSAADSQ; RGKKRVSSAADSQ	3,4	3.967	0.7143	0.00815	0.99998	1		1	4	S14; S253	0.165025	0.346288	0.911885	0.784063	0.984635	0.963317	0.953601	0.00317939	2-PN	0.149415	0.250493	0.973585	0.000788902	0.000139505
PMI_003611	S242	XP_022097181.1 pancreatic lipase-related protein 2-like [Acanthaster planci] (id=77.89%; len=199; e=6.70E-107)	VHLIGHSLGAHAA	4	1.32	0.2842	0.06417	1	1		1		S242	0.137669	0.200886	0.196109	0.321546	1	0.188756	0.916446	0.0101803	2-PN
50793|m.33899; Pmi_646842_KLC_STRPU_Kinesin_light_chain|m.24443	S563; S542	XP_022107829.1 kinesin light chain-like isoform X5 [Acanthaster planci] (id=97.68%; len=647; e=0.00E+00) ; KLC_STRPU_Kinesin_light_chain	PGSRRESSDSVSY; PGSRRESSDSVSY	2,3	2.829	0.6002	0.095557	1	3		3	1	S563; S542	0.119652	0.423827	0.827461	0.853302	0.902965	0.602353	0.833108	0.0394552	2-PN	0.422669	0.568876	0.874574	0.238419	0.0146874
PMI_009154; Pmi_558151_PI4P1_HUMAN_Putative_phosphatidylinositol_4-kinase_alpha-lik..CUT|m.10298	S957; S152	XP_008323868.1 phosphatidylinositol 4-kinase alpha-like [Cynoglossus semilaevis] (id=53.28%; len=1646; e=0.00E+00) ; PI4P1_HUMAN_Putative_phosphatidylinositol_4-kinase_alpha-lik..CUT	PDSGTLSVLPTDM; PDSGTLSVLPTDM	3	2.249	0.582	0.539147	0.97719		1	1		S957; S152	0.132165	0.556843	0.840178	0.885705	1	0.859202	0.92543	0.00813365	2-PN
78954|m.52969; Pmi_665534_CTNB_TRIGR_Catenin_beta|m.30038; PMI_019257; PMI_002467	S12; S12; S12; S12	XP_022109853.1 catenin beta-like [Acanthaster planci] (id=99.29%; len=421; e=0.00E+00) ; CTNB_TRIGR_Catenin_beta; BBG74726.1 beta-catenin [Patiria pectinifera] (id=85.58%; len=763; e=0.00E+00) ; BBG74726.1 beta-catenin [Patiria pectinifera] (id=71.81%; len=706; e=0.00E+00)	QKPFVASPAGQSA; QKPFVASPAGQSA; QKPFVASPAGQSA; QKPFVASPAGQSA	3	4.771	0.6871	0.523723	1		1	1	1	S12; S12; S12; S12	0.233672	0.624669	0.84088	0.651439	1	0.621987	0.945229	0.00441767	2-PN	0.356166	0.363845	0.791306	0.860955	0.0555175
PMI_011813; Pmi_637953_P73_HUMAN_Tumor_protein_p73|m.22244	S18; S431	XP_022110152.1 cellular tumor antigen p53-like isoform X5 [Acanthaster planci] (id=72.92%; len=277; e=8.33E-119) ; P73_HUMAN_Tumor_protein_p73	SQQQGASPPNNPP; SQQQGASPPNNPP	4	5.515	0.7888	0.688213	1		1	2		S18; S431	0.407712	0.736255	0.899784	0.586004	1	0.813903	0.807953	0.0517817	2-PN
Pmi_649030_no_annot|m.25022; 33806|m.23909	S462; S128	no_annot; XP_022081903.1 uncharacterized protein LOC110974512 [Acanthaster planci] (id=55.44%; len=294; e=2.03E-85)	DKDAALSPKSEQY; DKDAALSPKSEQY	3	1.723	0.397	0.212616	1		1	1		S462; S128	0.408749	0.44838	0.775625	0.857078	0.954356	0.933843	0.859245	0.0283236	2-PN
36279|m.25260; PMI_019420	S129; S390	XP_022097969.1 uncharacterized protein LOC110983210 isoform X2 [Acanthaster planci] (id=86.06%; len=545; e=0.00E+00) ; XP_022097969.1 uncharacterized protein LOC110983210 isoform X2 [Acanthaster planci] (id=63.41%; len=686; e=0.00E+00)	RPLKEDSGRDSPS; RPLKEDSGRDSPS	3,4	2.07	0.5754	0.066399	0.99545		2	2	2	S129; S390	0.720221	0.519883	0.203736	0.412413	1	0.390424	0.985063	0.000333004	2-PN	0.865569	0.942472	0.520447	0.107557	0.000545642
PMI_019613	T192:S194	XP_022104856.1 NACHT, LRR and PYD domains-containing protein 2-like [Acanthaster planci] (id=63.48%; len=408; e=5.18E-147)	RKEDIATSSPKSK,EDIATSSPKSKPT	2	1.272	0.3437	1.4617	0.99998	1	1			T192:S194	0	0.116994	0.266064	0.299684	1	0.203971	0.969643	0.00136838	2-PN
Pmi_648480_no_annot|m.24893	S662	no_annot	EFEVDESPQSIKE	3	2.74	0.5603	0.505842	1	1	1			S662	0.068948	0.35812	0.891966	0.848452	0.89637	0.761571	0.908969	0.0120527	2-PN
62785|m.41532; PMI_010747; Pmi_657650_no_annot|m.27495; 62798|m.41552	T363; T410; T498; T367	XP_022097149.1 mucin-12-like isoform X2 [Acanthaster planci] (id=63.25%; len=419; e=7.07E-145) ; XP_022097147.1 mucin-12-like isoform X1 [Acanthaster planci] (id=60.47%; len=774; e=0.00E+00) ; no_annot; XP_022097147.1 mucin-12-like isoform X1 [Acanthaster planci] (id=63.81%; len=420; e=4.30E-146)	KASSSVTPSKTPV; KASSSVTPSKTPV; KASSSVTPSKTPV; KASSSVTPSKTPV	3	1.465	0.4827	0.713243	0.99228	1	1			T363; T410; T498; T367	0.0844037	0.789504	0.66273	0.449713	1	0.924533	0.993271	6.77738e-05	2-PN
PMI_019471; PMI_000158	S115:S119; S306:S310	XP_022082742.1 LOW QUALITY PROTEIN: serine/threonine-protein kinase BRSK2-like [Acanthaster planci] (id=73.87%; len=421; e=0.00E+00) ; XP_022082742.1 LOW QUALITY PROTEIN: serine/threonine-protein kinase BRSK2-like [Acanthaster planci] (id=76.71%; len=644; e=0.00E+00)	TSSPVPSPQHSPR,VPSPQHSPRHLPR; TSSPVPSPQHSPR,VPSPQHSPRHLPR	3	1.891	0.4008	0.259943	1	1	1			S115:S119; S306:S310	0.200696	0.14545	0.164452	0.873045	1	0.141979	0.998106	5.37506e-06	2-PN
Pmi_622610_TCPR2_HUMAN_Tectonin_beta-propeller_repeat-containing_protein_2|m.18964; 14698|m.9641	S179; S69	TCPR2_HUMAN_Tectonin_beta-propeller_repeat-containing_protein_2; XP_022096649.1 tectonin beta-propeller repeat-containing protein 2-like [Acanthaster planci] (id=59.71%; len=484; e=1.09E-164)	IPDGFNSPSHNGG; IPDGFNSPSHNGG	3	3.539	0.7054	1.18218	1	1	2			S179; S69	0.466301	0.92232	0.833928	0.751649	1	0.771227	0.877993	0.0214204	2-PN
Pmi_581290_IPP2_RAT_Protein_phosphatase_inhibitor_2|m.12692	S200	IPP2_RAT_Protein_phosphatase_inhibitor_2	GEQTSSSLDDANS	2,3	4.105	0.7367	0.004666	0.99998	2	1	1	2	S200	0.256765	0.484925	0.823822	0.896637	0.871362	0.957235	0.835171	0.0385137	FC	0.252062	0.320405	0.971548	0.0533731	5.97081e-05
9256|m.5544; Pmi_580910_TM1L2_HUMAN_TOM1-like_protein_2|m.12625; 9255|m.5542	S137:T146; S137:T146; S137:T146	XP_022092307.1 TOM1-like protein 2 isoform X4 [Acanthaster planci] (id=83.18%; len=214; e=1.10E-124) ; TM1L2_HUMAN_TOM1-like_protein_2; XP_022092307.1 TOM1-like protein 2 isoform X4 [Acanthaster planci] (id=81.65%; len=218; e=1.22E-123)	TNLDELSPIVTPQ,VTPQRATPEVDPA; TNLDELSPIVTPQ,VTPQRATPEVDPA; TNLDELSPIVTPQ,VTPQRATPEVDPA	4	4.669	0.7332	0.329769	1	1	1	1		S137:T146; S137:T146; S137:T146	0	0.217316	0.738313	0.727257	0.79474	1	0.977813	0.000732922	FC
Pmi_651750_LRP12_PONAB_Low-density_lipoprotein_receptor-related_protein_12|m.25767; PMI_016332	S666:S675; S276:S285	LRP12_PONAB_Low-density_lipoprotein_receptor-related_protein_12; XP_022082444.1 low-density lipoprotein receptor-related protein 12-like, partial [Acanthaster planci] (id=66.39%; len=485; e=3.99E-177)	PPLRRISGELSCP,LSCPTVSPSPAEA; PPLRRISGELSCP,LSCPTVSPSPAEA	3	3.487	0.5169	0.211064	0.99993	1	2	1	1	S666:S675; S276:S285	0	0.398951	0.852103	0.836625	0.807208	0.866286	0.907297	0.0124923	FC	0.190841	0.358473	0.87505	0.115552	0.00156023
PMI_003461	S392	XP_022085127.1 hamartin-like [Acanthaster planci] (id=76.34%; len=672; e=0.00E+00)	RRRPHPSAGSVVS	4	2.574	0.4915	0.089579	1	1	1	1		S392	0	0.094306	0.595639	0.464005	0.780062	1	0.897874	0.0151119	FC
Pmi_622610_TCPR2_HUMAN_Tectonin_beta-propeller_repeat-containing_protein_2|m.18964	S49	TCPR2_HUMAN_Tectonin_beta-propeller_repeat-containing_protein_2	TPDATLSPELLAA	3	4.536	0.5946	0.136048	0.99667	1	1	1		S49	0	0.205631	0.401971	0.478813	0.493396	1	0.956886	0.00274814	FC
PMI_004602; Pmi_655861_RIC1_HUMAN_Protein_RIC1_homolog|m.26965; 21401|m.16056; PMI_007461; 21399|m.16053	S922; S172; S519; S843; S362	XP_022109726.1 RAB6A-GEF complex partner protein 1-like [Acanthaster planci] (id=89.80%; len=1363; e=0.00E+00) ; RIC1_HUMAN_Protein_RIC1_homolog; XP_022109726.1 RAB6A-GEF complex partner protein 1-like [Acanthaster planci] (id=95.51%; len=535; e=0.00E+00) ; XP_022109726.1 RAB6A-GEF complex partner protein 1-like [Acanthaster planci] (id=83.79%; len=1320; e=0.00E+00) ; XP_022109726.1 RAB6A-GEF com…	IVFPLGSPTPLPA; IVFPLGSPTPLPA; IVFPLGSPTPLPA; IVFPLGSPTPLPA; IVFPLGSPTPLPA	3,4	3.881	0.6885	0.08021	0.99999	2	1	2		S922; S172; S519; S843; S362	0	0.86073	0.143994	0.171983	0.212094	0.993782	0.980845	0.000546875	FC
Pmi_619100_no_annot|m.18299; 53919|m.35806; PMI_025225; PMI_024591	S324; S302; S315; S141	no_annot; XP_022103609.1 stress response protein NST1-like isoform X1 [Acanthaster planci] (id=74.27%; len=614; e=0.00E+00) ; XP_022103609.1 stress response protein NST1-like isoform X1 [Acanthaster planci] (id=81.04%; len=422; e=0.00E+00) ; XP_022103609.1 stress response protein NST1-like isoform X1 [Acanthaster planci] (id=70.42%; len=453; e=0.00E+00)	LGASALSPVQSPT; LGASALSPVQSPT; LGASALSPVQSPT; LGASALSPVQSPT	3	5.317	0.6015	1.31322	1	1	1	2		S324; S302; S315; S141	0	0.727242	0.1451	0.617989	0.613276	1	0.835926	0.0381719	FC
PMI_019614	T199	XP_022083144.1 tetratricopeptide repeat protein 27-like isoform X2 [Acanthaster planci] (id=72.36%; len=351; e=2.18E-170)	LRVRHKTDTEDSS	3	1.862	0.5918	0.119328	1	1	1	2		T199	0.00626118	0.121315	0.496249	0.492572	0.719204	1	0.9351	0.00618133	FC
Pmi_661270_KI67_HUMAN_Antigen_KI-67|m.29501; 68293|m.45529; 68308|m.45566; 68305|m.45564; 68294|m.45532	S1147; S97; S97; S97; S97	KI67_HUMAN_Antigen_KI-67; XP_022080667.1 nascent polypeptide-associated complex subunit alpha, muscle-specific form-like [Acanthaster planci] (id=69.87%; len=468; e=1.45E-170) ; XP_022080667.1 nascent polypeptide-associated complex subunit alpha, muscle-specific form-like [Acanthaster planci] (id=67.95%; len=468; e=9.49E-169) ; XP_022080667.1 nascent polypeptide-associated complex subunit alpha, …	PGVMAVSPLTSRV; PGVMAVSPLTSRV; PGVMAVSPLTSRV; PGVMAVSPLTSRV; PGVMAVSPLTSRV	3	4.058	0.7587	0.033727	1	4	4	3		S1147; S97; S97; S97; S97	0.00677063	0.469419	0.522109	0.723944	0.901542	0.956775	0.907125	0.012538	FC
PMI_007968; Pmi_649253_S38A6_XENTR_Probable_sodium-coupled_neutral_amino_acid_tr..CUT|m.25110	S8; S8	XP_022106997.1 probable sodium-coupled neutral amino acid transporter 6 isoform X1 [Acanthaster planci] (id=67.11%; len=526; e=0.00E+00) ; S38A6_XENTR_Probable_sodium-coupled_neutral_amino_acid_tr..CUT	DIVRSRSPGITGH; DIVRSRSPGITGH	3,4	2.297	0.5868	0.074686	0.9979	3	2	2	1	S8; S8	0.0153627	0.547891	0.883646	0.64362	0.79943	0.912582	0.910141	0.0117491	FC	0.198165	0.253914	0.994099	0.39699	0.00311211
41259|m.28102; 41255|m.28099; PMI_009630; PMI_009102	S42; S40; S38; S38	XP_022094600.1 spermatogenesis-defective protein 39 homolog [Acanthaster planci] (id=81.64%; len=561; e=0.00E+00) ; XP_022094600.1 spermatogenesis-defective protein 39 homolog [Acanthaster planci] (id=82.35%; len=561; e=0.00E+00) ; XP_022094600.1 spermatogenesis-defective protein 39 homolog [Acanthaster planci] (id=78.12%; len=329; e=5.33E-174) ; XP_022094600.1 spermatogenesis-defective protein 3…	NFFDDFSPDNDGR; NFFDDFSPDNDGR; NFFDDFSPDNDGR; NFFDDFSPDNDGR	2,3	2.111	0.7358	0.07079	1	1	2	1		S42; S40; S38; S38	0.0372492	0.367958	0.590602	0.622362	0.617662	1	0.932368	0.00670654	FC
59211|m.39156; Pmi_633290_UBE2O_HUMAN_Ubiquitin-conjugating_enzyme_E2_O|m.21176	S112; S112	XP_022093687.1 (E3-independent) E2 ubiquitin-conjugating enzyme-like [Acanthaster planci] (id=66.01%; len=1427; e=0.00E+00) ; UBE2O_HUMAN_Ubiquitin-conjugating_enzyme_E2_O	AKDADCSLEASMP; AKDADCSLEASMP	3	4.484	0.7841	0.464679	1	2	2	2		S112; S112	0.0575354	0.403025	0.848638	0.824385	0.843976	1	0.940909	0.0051344	FC
PMI_000263; PMI_006259; Pmi_670130_DNMT1_PARLI_DNA_(cytosine-5)-methyltransferase_PliMCI|m.31757; 83622|m.56115; 83624|m.56120	S187; S210; S187; S47; S47	AFR91943.1 DNA cytosine-5-methyltransferase 1 [Patiria pectinifera] (id=95.74%; len=1619; e=0.00E+00) ; AFR91943.1 DNA cytosine-5-methyltransferase 1 [Patiria pectinifera] (id=90.61%; len=330; e=0.00E+00) ; DNMT1_PARLI_DNA_(cytosine-5)-methyltransferase_PliMCI; AFR91943.1 DNA cytosine-5-methyltransferase 1 [Patiria pectinifera] (id=99.04%; len=1040; e=0.00E+00) ; AFR91943.1 DNA cytosine-5-methylt…	SPPLSNSVNGKRK; SPPLSNSVNGKRK; SPPLSNSVNGKRK; SPPLSNSVNGKRK; SPPLSNSVNGKRK	3,4	3.704	0.648	0.259977	1	3	2	1		S187; S210; S187; S47; S47	0.00438761	0.0626312	0.250283	0.128766	0.460432	1	0.997261	1.12416e-05	FC
77085|m.51585; 77083|m.51582; 77084|m.51584	T524; T29; T474	XP_022087380.1 origin recognition complex subunit 1-like [Acanthaster planci] (id=61.60%; len=539; e=0.00E+00) ; XP_022087380.1 origin recognition complex subunit 1-like [Acanthaster planci] (id=91.58%; len=273; e=3.38E-171) ; XP_022087380.1 origin recognition complex subunit 1-like [Acanthaster planci] (id=59.47%; len=486; e=1.12E-158)	KSIAPKTPISVTR; KSIAPKTPISVTR; KSIAPKTPISVTR	2,3,4	1.387	0.551	0.065293	1	3	2	2	1	T524; T29; T474	0.0112473	0.276855	0.273381	0.275173	0.215804	1	0.996866	1.47149e-05	FC	0.101775	0.974764	0.796613	3.36072e-06	0.000527606
PMI_006773; PMI_019692; Pmi_650720_PO210_RAT_Nuclear_pore_membrane_glycoprotein_210|m.25458	T966:S979; T914:S927; T1026:S1039	XP_022099451.1 nuclear pore membrane glycoprotein 210-like isoform X1 [Acanthaster planci] (id=85.05%; len=883; e=0.00E+00) ; XP_022099452.1 nuclear pore membrane glycoprotein 210-like isoform X2 [Acanthaster planci] (id=76.99%; len=943; e=0.00E+00) ; PO210_RAT_Nuclear_pore_membrane_glycoprotein_210	SGVFLRTPPPGAP,PPYLSQSPAYQQS; SGVFLRTPPPGAP,PPYLSQSPAYQQS; SGVFLRTPPPGAP,PPYLSQSPAYQQS	4	5.487	0.358	0.090863	0.99059	1	2	1		T966:S979; T914:S927; T1026:S1039	0.0141815	0.0415367	0.0629527	0.337772	0.430876	1	0.962704	0.00206059	FC
PMI_009079	S419:S423	XP_022085282.1 golgin subfamily A member 2-like [Acanthaster planci] (id=77.05%; len=758; e=0.00E+00)	AESQTSSPNVSLE,TSSPNVSLEDGRV	2,3	3.025	0.7004	0.304773	1	4	3	4	1	S419:S423	0.0181652	0.206369	0.874703	0.811379	0.807972	0.984204	0.977989	0.000721406	FC	0.0928753	0.142904	0.962262	0.0458166	8.16012e-05
PMI_015153; Pmi_638540_FER_MOUSE_Tyrosine-protein_kinase_Fer|m.22362	S173:S178; S27:S32	XP_022100523.1 F-box/LRR-repeat protein 17-like [Acanthaster planci] (id=37.77%; len=188; e=3.45E-20) ; FER_MOUSE_Tyrosine-protein_kinase_Fer	DGVFSRSPAASSP,RSPAASSPKESSS; DGVFSRSPAASSP,RSPAASSPKESSS	2,3,4	3.153	0.6399	0.022924	0.99635	2	3	1	3	S173:S178; S27:S32	0.0138601	0.300026	0.856529	0.856853	0.741974	0.877518	0.897891	0.0151071	FC	0.0476195	0.0997009	0.991104	0.011773	3.7556e-07
81758|m.54936; 81754|m.54922; 81756|m.54930; 81755|m.54926; 81757|m.54933; Pmi_671080_RIF1_HUMAN_Telomere-associated_protein_RIF1|m.32102	S346:S350; S346:S350; S346:S350; S346:S350; S187:S191; S1425:S1429	XP_022090786.1 telomere-associated protein RIF1-like isoform X2 [Acanthaster planci] (id=55.51%; len=490; e=5.92E-129) ; XP_022090787.1 telomere-associated protein RIF1-like [Acanthaster planci] (id=62.19%; len=804; e=0.00E+00) ; XP_022090785.1 telomere-associated protein RIF1-like isoform X1 [Acanthaster planci] (id=56.33%; len=490; e=1.14E-130) ; XP_022090787.1 telomere-associated protein RIF1-…	VSKADDSLAISPA,DDSLAISPARSGS; GSKADDSLAISPA,DDSLAISPARSGN; GSKADDSLAISPA,DDSLAISPARSGN; VSKADDSLAISPA,DDSLAISPARSGS; GSKADDSLAISPA,DDSLAISPARSGN; GSKADDSLAISPA,DDSLAISPARSGN	2	1.824	0.6234	0.092791	1	1	1	1		S346:S350; S346:S350; S346:S350; S346:S350; S187:S191; S1425:S1429	0.0137888	0.472992	0.966709	0.525906	0.564954	0.970633	0.927848	0.0076211	FC
PMI_020137	S1107:T1110	XP_022101706.1 rapamycin-insensitive companion of mTOR-like [Acanthaster planci] (id=86.03%; len=1246; e=0.00E+00)	EPPVDASYDTQSE,VDASYDTQSEYRG	3	3.644	0.442	0.710932	0.9973	1	1	1		S1107:T1110	0.0272787	0.297204	0.878251	0.770538	0.897266	0.976018	0.938423	0.00557081	FC
PMI_025998	S402:S405	XP_022102124.1 TBC1 domain family member 10A-like [Acanthaster planci] (id=80.51%; len=467; e=0.00E+00)	NRSTAESPVSPGP,TAESPVSPGPEKS	2,3	2.4	0.6917	0.520714	0.99997	1	2	1		S402:S405	0.00648785	0.456283	0.609248	0.853707	0.688187	1	0.984178	0.000373512	FC
PMI_003631; Pmi_614003_ANX13_CANFA_Annexin_A13|m.17363	S318; S53	XP_022111171.1 uncharacterized protein LOC110990467 isoform X3 [Acanthaster planci] (id=86.77%; len=922; e=0.00E+00) ; ANX13_CANFA_Annexin_A13	PNLMETSPGKGYW; PNLMETSPGKGYW	3	1.486	0.5094	0.075669	0.99724	1	1	1		S318; S53	0.0283543	0.493336	0.903801	0.871101	0.77867	0.952852	0.946665	0.00419113	FC
PMI_013012	S71:S83	XP_022083005.1 ral GTPase-activating protein subunit alpha-1-like isoform X2 [Acanthaster planci] (id=81.94%; len=1678; e=0.00E+00)	RSFEDASPQPEAC,CQPLLPSPTTLKS	3,4	3.942	0.6963	0.063108	0.99999	2	1	2		S71:S83	0.00824007	0.251665	0.9003	0.877543	0.77742	1	0.993127	7.06999e-05	FC
Pmi_643630_RMI1_HUMAN_RecQ-mediated_genome_instability_protein_1|m.23629; 31829|m.22739; 31826|m.22736; PMI_011167	S610; S389; S384; S577	RMI1_HUMAN_RecQ-mediated_genome_instability_protein_1; XP_022106857.1 recQ-mediated genome instability protein 1-like isoform X2 [Acanthaster planci] (id=54.83%; len=580; e=2.52E-170) ; XP_022106857.1 recQ-mediated genome instability protein 1-like isoform X2 [Acanthaster planci] (id=54.48%; len=580; e=5.64E-168) ; XP_022106856.1 recQ-mediated genome instability protein 1-like isoform X1 [Acantha…	KRRRFRSNEGGWA; KRRRFRSNEGGWA; KRRRFRSNEGGWA; KRRRFRSNEGGWA	3	2.398	0.5546	0.022061	1	1	1	1		S610; S389; S384; S577	0.0229247	0.450383	0.893826	0.833304	0.789372	1	0.960983	0.00225378	FC
PMI_029348; Pmi_655200_PI51A_MOUSE_Phosphatidylinositol_4-phosphate_5-kinase_ty..CUT|m.26817; 29692|m.21523	S49:T57; S49:T57; S25:T33	XP_022088487.1 phosphatidylinositol 4-phosphate 5-kinase type-1 alpha-like isoform X4 [Acanthaster planci] (id=86.96%; len=69; e=1.18E-29) ; PI51A_MOUSE_Phosphatidylinositol_4-phosphate_5-kinase_ty..CUT; XP_022088485.1 phosphatidylinositol 4-phosphate 5-kinase type-1 alpha-like isoform X2 [Acanthaster planci] (id=89.78%; len=401; e=0.00E+00)	GTMDGSSPLGEQP,LGEQPTTPRQKKI; GTMDGSSPLGEQP,LGEQPTTPRQKKI; GTMDGSSPLGEQP,LGEQPTTPRQKKI	3	4.396	0.7405	0.076305	0.99778	3	2	2		S49:T57; S49:T57; S25:T33	0.0133288	0.302082	0.806656	0.636045	0.877688	0.900996	0.888817	0.0178552	FC
PMI_024613	S411:S415	XP_022099030.1 myotubularin-related protein 8-like isoform X1 [Acanthaster planci] (id=78.79%; len=481; e=0.00E+00)	AASPPMSPPTSPS,PMSPPTSPSMSTF	3	3.791	0.3166	0.00552	0.99997	3	4	3	8	S411:S415	0.0424266	0.688114	0.883736	0.904207	0.866137	0.963131	0.980744	0.000552603	FC	0.119561	0.258422	0.9724	0.00507586	0.00019763
PMI_000619	S676	XP_022083050.1 microtubule-associated protein 10-like isoform X1 [Acanthaster planci] (id=67.37%; len=993; e=0.00E+00)	RNRQIVSPEQPPV	2,3	2.867	0.6958	0.25884	1	1	1	1	1	S676	0.0544063	0.648329	0.936601	0.89625	0.69905	0.950801	0.927336	0.00772833	FC	0.188914	0.277063	0.93167	0.0490595	0.000491384
63197|m.41807; Pmi_643660_ZN192_PANTR_Zinc_finger_protein_192|m.23640; PMI_007082; 63199|m.41810	S481; S1053; S1072; S481	XP_022082285.1 uncharacterized protein LOC110974753 [Acanthaster planci] (id=40.09%; len=1886; e=0.00E+00) ; ZN192_PANTR_Zinc_finger_protein_192; XP_022082285.1 uncharacterized protein LOC110974753 [Acanthaster planci] (id=47.56%; len=1209; e=0.00E+00) ; XP_022082285.1 uncharacterized protein LOC110974753 [Acanthaster planci] (id=42.19%; len=1351; e=0.00E+00)	LEVPQTSPLDKII; LEVPQTSPLDKII; LEVPQTSPLDKII; LEVPQTSPLDKII	3	3.56	0.5885	0.059407	0.99769	1	1	1	1	S481; S1053; S1072; S481	0.0580021	0.294104	0.92751	0.830323	0.876494	0.994687	0.98569	0.000305684	FC	0.125934	0.180378	0.834543	0.310447	0.0168542
38112|m.26197; PMI_018839; Pmi_637260_ERC6L_DANRE_DNA_excision_repair_protein_ERCC-6-like|m.22097	S399:S402; S971:S974; S970:S973	XP_022086433.1 DNA excision repair protein ERCC-6-like [Acanthaster planci] (id=77.98%; len=445; e=0.00E+00) ; XP_022086433.1 DNA excision repair protein ERCC-6-like [Acanthaster planci] (id=75.65%; len=1388; e=0.00E+00) ; ERC6L_DANRE_DNA_excision_repair_protein_ERCC-6-like	GVSLDQSTESEKA,LDQSTESEKARRK; GVSLDQSTESEKA,LDQSTESEKARRK; GVSLDQSTESEKA,LDQSTESEKARRK	3,4	5.326	0.6955	0.314347	0.99308	2	2	1	2	S399:S402; S971:S974; S970:S973	0.0312196	0.102445	0.428189	0.546346	0.664581	1	0.983632	0.000399658	FC	0.453071	0.547634	0.958001	0.265544	6.75459e-05
PMI_021224	S199	XP_022087231.1 RNA exonuclease 1 homolog isoform X1 [Acanthaster planci] (id=58.77%; len=1664; e=0.00E+00)	SVQRGHSGDASLE	3	4.397	0.731	0.14363	0.99999	1	1	1		S199	0.0230951	0.137112	0.843111	0.822255	0.822737	0.855586	0.817681	0.0468304	FC
PMI_021853; PMI_027730	S511; S335	XP_022101621.1 hydroxymethylglutaryl-CoA synthase 1-like [Acanthaster planci] (id=70.63%; len=446; e=0.00E+00) ; XP_022101621.1 hydroxymethylglutaryl-CoA synthase 1-like [Acanthaster planci] (id=86.00%; len=200; e=4.80E-118)	DSAPVSSPIETLK; DSAPVSSPIETLK	3,4	4.465	0.7328	0.013786	0.99995	1	2	2		S511; S335	0.0674535	0.67519	0.905184	0.762915	0.927908	0.985047	0.901068	0.0141972	FC
PMI_025509; Pmi_598900_RABX5_MOUSE_Rab5_GDP/GTP_exchange_factor|m.15014; PMI_000489	T97; T111; T119	XP_022102211.1 rab5 GDP/GTP exchange factor-like isoform X2 [Acanthaster planci] (id=74.82%; len=548; e=0.00E+00) ; RABX5_MOUSE_Rab5_GDP/GTP_exchange_factor; XP_022102207.1 rab5 GDP/GTP exchange factor-like isoform X1 [Acanthaster planci] (id=84.15%; len=492; e=0.00E+00)	KTFFGKTAKSPNK; KTFFGKTAKSPNK; KTFFGKTAKSPNK	4,5	2.095	0.5277	0.001291	0.99216	1	2	1	1	T97; T111; T119	0.123398	0.788684	0.753036	0.828494	0.837236	1	0.835641	0.0383009	FC	0.452238	0.433236	0.977615	0.892572	0.0495473
PMI_008660; Pmi_598580_IWS1_MOUSE_Protein_IWS1_homolog|m.14983; 21731|m.16426; 21732|m.16430	S391; S399; S399; S399	XP_022093464.1 protein IWS1 homolog [Acanthaster planci] (id=60.66%; len=572; e=4.56E-132) ; IWS1_MOUSE_Protein_IWS1_homolog; XP_022093464.1 protein IWS1 homolog [Acanthaster planci] (id=71.83%; len=813; e=0.00E+00) ; XP_022093464.1 protein IWS1 homolog [Acanthaster planci] (id=71.46%; len=813; e=0.00E+00)	DEPYDRSVDEGLQ; AEPYDRSVDEGLQ; AEPYDRSVDEGLQ; AEPYDRSVDEGLQ	3	6.959	0.8031	1.51767	1	1	1	1		S391; S399; S399; S399	0.0431712	0.645273	0.929109	0.67379	0.756784	0.965129	0.884201	0.0193379	FC
PMI_009884; 70572|m.47089; 70565|m.47075	S705; S583; S583	XP_022097990.1 trithorax group protein osa-like isoform X2 [Acanthaster planci] (id=59.77%; len=1469; e=0.00E+00) ; XP_022097998.1 trithorax group protein osa-like isoform X3 [Acanthaster planci] (id=78.64%; len=1044; e=0.00E+00) ; XP_022097990.1 trithorax group protein osa-like isoform X2 [Acanthaster planci] (id=78.64%; len=1044; e=0.00E+00)	PLPGGRSPIPFGL; PLPGGRSPIPFGL; PLPGGRSPIPFGL	2,3	3.511	0.5956	0.077401	1	2	2	2		S705; S583; S583	0.0726789	0.163872	0.051345	0.771374	0.58802	0.843531	0.842191	0.0353904	FC
PMI_021642	S476	XP_022083166.1 RNA polymerase II-associated factor 1 homolog [Acanthaster planci] (id=80.17%; len=585; e=0.00E+00)	GSEKAESEAEQEA	3	4.257	0.743	0.686862	1	1	1	1		S476	0.0992216	0.543116	0.489652	0.457604	0.531447	1	0.878356	0.0212958	FC
PMI_002839; Pmi_622450_MFAP1_HUMAN_Microfibrillar-associated_protein_1|m.18922; PMI_008850	T308; T308; T307	XP_022095031.1 microfibrillar-associated protein 1-like [Acanthaster planci] (id=87.94%; len=481; e=0.00E+00) ; MFAP1_HUMAN_Microfibrillar-associated_protein_1; XP_022095031.1 microfibrillar-associated protein 1-like [Acanthaster planci] (id=88.36%; len=481; e=0.00E+00)	NLASVNTDDENDE; NLASVNTDDENDE; NLASVNTDDENDE	3	5.563	0.7775	0.495486	1	1	1	1		T308; T308; T307	0.129013	0.658314	0.441161	0.180006	0.644938	1	0.81517	0.048086	FC
PMI_017582; Pmi_655763_ZN608_HUMAN_Zinc_finger_protein_608|m.26942	S44; S145	XP_022094028.1 zinc finger protein 608-like [Acanthaster planci] (id=80.89%; len=1209; e=0.00E+00) ; ZN608_HUMAN_Zinc_finger_protein_608	SVPSNVSPAKGAG; SVPSNVSPAKGAG	4	5.543	0.6814	0.559927	1	1	1	1	1	S44; S145	0.173136	0.461705	0.570312	0.617812	0.649987	1	0.937111	0.00580818	FC	0.662994	0.640065	0.967762	0.759342	0.00303904
PMI_002531; Pmi_557542_VP13D_HUMAN_Vacuolar_protein_sorting-associated_protein_13D|m.10236	S371; S104	XP_022090239.1 vacuolar protein sorting-associated protein 13D-like isoform X2 [Acanthaster planci] (id=88.36%; len=3584; e=0.00E+00) ; VP13D_HUMAN_Vacuolar_protein_sorting-associated_protein_13D	EQPAQKSLHGDTS; EQPAQKSLHGDTS	2,3	3.076	0.7077	0.052964	1	2	1	3		S371; S104	0.0998176	0.463409	0.828166	0.505671	0.88432	0.990886	0.861028	0.0276278	FC
PMI_000299; Pmi_657261_CTNA2_PONAB_Catenin_alpha-2|m.27395; PMI_009919; 78679|m.52774	T638:T640; T639:T641; T639:T641; T212:T214	XP_022091733.1 catenin alpha-2-like [Acanthaster planci] (id=94.88%; len=703; e=0.00E+00) ; CTNA2_PONAB_Catenin_alpha-2; XP_022091733.1 catenin alpha-2-like [Acanthaster planci] (id=94.70%; len=679; e=0.00E+00) ; XP_022091733.1 catenin alpha-2-like [Acanthaster planci] (id=95.83%; len=480; e=0.00E+00)	SLEEMETDTEYDE,EEMETDTEYDEEE; SLEEMETDTEYDE,EEMETDTEYDEEE; SLEEMETDTEYDE,EEMETDTEYDEEE; SLEEMETDTEYDE,EEMETDTEYDEEE	3	3.522	0.6491	0.049461	0.99997	1	1	1		T638:T640; T639:T641; T639:T641; T212:T214	0.0995996	0.484603	0.601843	0.561797	0.778667	0.917149	0.802044	0.054901	FC
Pmi_665691_MECP2_MOUSE_Methyl-CpG-binding_protein_2|m.30098; 1912|m.1014; PMI_009111	S137:T141; S56:T60; S121:T125	MECP2_MOUSE_Methyl-CpG-binding_protein_2; XP_022102509.1 methyl-CpG-binding domain protein 4-like [Acanthaster planci] (id=57.14%; len=182; e=6.15E-55) ; XP_022102509.1 methyl-CpG-binding domain protein 4-like [Acanthaster planci] (id=68.08%; len=401; e=1.70E-153)	AEAEATSPSTTPV,ATSPSTTPVKSKD; AEAEATSPSTTPV,ATSPSTTPVKSKD; AEAEATSPSTTPV,ATSPSTTPVKSKD	3,4	4.269	0.3683	0.779948	0.99651	2	3	1		S137:T141; S56:T60; S121:T125	0.173078	0.597131	0.877305	0.927156	0.771149	0.994411	0.955556	0.00291898	FC
Pmi_641003_WIBG_XENTR_Partner_of_Y14_and_mago|m.22972; 23945|m.18244	S106; S106	WIBG_XENTR_Partner_of_Y14_and_mago; XP_022090724.1 partner of Y14 and mago-like [Acanthaster planci] (id=74.44%; len=133; e=2.95E-40)	ADEGHASQEQTEE; ADEGHASQEQTEE	3	3.976	0.753	0.093537	1	1	1	1	1	S106; S106	0.303894	0.564344	0.833343	0.905008	0.888567	0.921766	0.909359	0.0119513	FC	0.527061	0.571527	0.969465	0.361422	0.000315332
59258|m.39198; 59255|m.39189	S596; S570	XP_022087871.1 protein HGV2-like isoform X2 [Acanthaster planci] (id=71.03%; len=573; e=0.00E+00) ; XP_022087871.1 protein HGV2-like isoform X2 [Acanthaster planci] (id=71.55%; len=587; e=0.00E+00)	EQKANGSAETAAM; EQKANGSAETAAM	2	1.454	0.7483	0.133674	1	2	2	1		S596; S570	0.259339	0.498328	0.473519	0.650975	0.700933	1	0.892145	0.0168217	FC
30398|m.21956; 30397|m.21953; 30393|m.21937; 30395|m.21946; 30394|m.21942; 30399|m.21960	S759; S234; S234; S779; S234; S271	XP_022086527.1 condensin complex subunit 3-like isoform X1 [Acanthaster planci] (id=84.10%; len=786; e=0.00E+00) ; XP_022086527.1 condensin complex subunit 3-like isoform X1 [Acanthaster planci] (id=70.45%; len=379; e=1.01E-160) ; XP_022086527.1 condensin complex subunit 3-like isoform X1 [Acanthaster planci] (id=70.71%; len=379; e=1.68E-162) ; XP_022086527.1 condensin complex subunit 3-like isof…	REMGQASGAEEGT; REMGQASGAEEGT; REMGQASGAEEGT; REMGQASGAEEGT; REMGQASGAEEGT; REMGQASGAEEGT	3,4	4.965	0.7698	0.662361	1	2	1	1		S759; S234; S234; S779; S234; S271	0.316009	0.407348	0.60818	0.635334	0.687272	1	0.917947	0.0098229	FC
PMI_000076; Pmi_636591_PUR9_CHICK_Bifunctional_purine_biosynthesis_protein_PURH|m.21946; 39146|m.26899; PMI_016831	Y197; Y209; Y209; Y209	XP_022082031.1 bifunctional purine biosynthesis protein PURH-like [Acanthaster planci] (id=70.31%; len=650; e=0.00E+00) ; PUR9_CHICK_Bifunctional_purine_biosynthesis_protein_PURH; XP_019628024.1 PREDICTED: bifunctional purine biosynthesis protein PURH-like [Branchiostoma belcheri] (id=73.52%; len=593; e=0.00E+00) ; XP_027869793.1 bifunctional purine biosynthesis protein PURH [Xiphophorus couchian…	SQLGLRYGTNPHQ; SQLGLRYGTNPHQ; SQLGLRYGTNPHQ; SQLGLRYGTNPHQ	3,4	4.083	0.6519	0.125719	1	1	1	1	3	Y197; Y209; Y209; Y209	0.271914	0.829665	0.615249	0.630798	0.669316	0.891109	0.97351	0.00104332	FC	0.610958	0.686555	0.971808	0.25999	0.000792087
71796|m.47993; Pmi_667511_TAOK3_HUMAN_Serine/threonine-protein_kinase_TAO3|m.30693	S343; S270	XP_022096284.1 serine/threonine-protein kinase TAO1-like isoform X3 [Acanthaster planci] (id=94.47%; len=905; e=0.00E+00) ; TAOK3_HUMAN_Serine/threonine-protein_kinase_TAO3	GVSDSVSESGDDV; GVSDSVSESGDDV	3,4	5.389	0.7771	0.046451	1	2	1	1	1	S343; S270	0.250276	0.58873	0.451064	0.470751	0.43372	1	0.817088	0.0471255	FC	0.646609	0.748153	0.987843	0.190587	0.00499291
Pmi_644313_no_annot|m.23846	S238	no_annot	GMGGGRSGSGGSP	2,3	2.039	0.4348	0.517019	0.9978	2	4	2		S238	0.00816371	0.0407095	0.0677886	0.378531	0.34364	1	0.997824	7.09672e-06	FC
36274|m.25252; Pmi_619760_no_annot|m.18407; 36268|m.25239; 36269|m.25240	S110; S110; S110; S110	XP_022098777.1 regulator of nonsense transcripts 2-like [Acanthaster planci] (id=40.50%; len=363; e=8.37E-41) ; no_annot; XP_022098777.1 regulator of nonsense transcripts 2-like [Acanthaster planci] (id=37.33%; len=150; e=2.30E-04) ; XP_022098777.1 regulator of nonsense transcripts 2-like [Acanthaster planci] (id=44.69%; len=461; e=7.09E-76)	LQEEISSPKSQEY; LQEEISSPKSQEY; LQEEISSPKSQEY; LQEEISSPKSQED	3,4	5.673	0.732	0.399892	0.99999	2	2	3		S110; S110; S110; S110	0.0351481	0.39004	0.87994	0.836537	0.760336	1	0.983888	0.000387293	FC
PMI_009832; Background_Pmi_618570_DCTD_PONAB_Deoxycytidylate_deaminase|m.18263	T274:S275; T313:S314	XP_022090346.1 nuclease-sensitive element-binding protein 1-like [Acanthaster planci] (id=80.64%; len=279; e=1.19E-89) ; DCTD_PONAB_Deoxycytidylate_deaminase	DRAPADTSENKE-,RAPADTSENKE--; DRAPADTSENKE-,RAPADTSENKE--	2,3	2.354	0.7413	0.021801	1	4	3	2		T274:S275; T313:S314	0.0308101	0.193812	0.599693	0.603354	0.740648	1	0.983052	0.000428411	FC
Pmi_587300_no_annot|m.13420	T148	no_annot	HAASEQTPQQASA	3	4.926	0.6307	0.028661	1	6	5	5	2	T148	0.0222143	0.331334	0.847052	0.759008	0.779225	0.97994	0.951194	0.00351492	FC	0.0649125	0.105938	0.973418	0.0337199	0.000246123
75417|m.50335; 75420|m.50342; 75431|m.50360; Pmi_652860_IF4B_MOUSE_Eukaryotic_translation_initiation_factor_4B|m.26087; PMI_002499; 75427|m.50351; 75430|m.50356	S252:T255:S258; S268:T271:S274; S169:T172:S175; S534:T537:S540; S566:T569:S572; S268:T271:S274; S252:T255:S258	XP_022084646.1 eukaryotic translation initiation factor 4B-like isoform X4 [Acanthaster planci] (id=65.56%; len=511; e=7.02E-180) ; XP_022084643.1 eukaryotic translation initiation factor 4B-like isoform X1 [Acanthaster planci] (id=65.91%; len=525; e=0.00E+00) ; XP_022084644.1 eukaryotic translation initiation factor 4B-like isoform X2 [Acanthaster planci] (id=73.80%; len=355; e=3.59E-141) ; IF4B…	SPTAPKSPKTPIS,APKSPKTPISPRE,SPKTPISPREEVS; SPTAPKSPKTPIS,APKSPKTPISPRE,SPKTPISPREEVS; SPTAPKSPKTPIS,APKSPKTPISPRE,SPKTPISPREEVS; SPTAPKSPKTPIS,APKSPKTPISPRE,SPKTPISPREEVS; SPTAPKSPKTPIS,APKSPKTPISPRE,SPKTPISPREEVS; SPTAPKSPKTPIS,APKSPKTPISPRE,SPKTPISPREEVS; SPTAPKSPKTPIS,APKSPKTPISPRE,SPKTPISPREEVS	2,3	1.426	0.4302	0.089018	1	3	4	4		S252:T255:S258; S268:T271:S274; S169:T172:S175; S534:T537:S540; S566:T569:S572; S268:T271:S274; S252:T255:S258	0.0291381	0.526184	0.775378	0.738655	0.701364	1	0.994826	4.00843e-05	FC
12171|m.7648; 12172|m.7651; Pmi_566440_no_annot|m.11006; 12173|m.7652	S137; S103; S310; S103	XP_022099229.1 roundabout homolog 2-like isoform X3 [Acanthaster planci] (id=74.52%; len=259; e=3.98E-105) ; XP_022099230.1 hemicentin-2-like isoform X4 [Acanthaster planci] (id=70.31%; len=192; e=1.19E-69) ; no_annot; XP_022099230.1 hemicentin-2-like isoform X4 [Acanthaster planci] (id=71.91%; len=210; e=7.48E-74)	IGDSDFSPPPVAL; IGDSDFSPPPVAL; IGDSDFSPPPVAL; IGDSDFSPPPVAL	4	3.2	0.6219	0.072217	1	2	1	2	1	S137; S103; S310; S103	0.0314218	0.449999	0.691552	0.885021	0.760425	1	0.982043	0.000480792	FC	0.0549506	0.116189	0.841659	0.154759	0.00880099
PMI_009079	S419	XP_022085282.1 golgin subfamily A member 2-like [Acanthaster planci] (id=77.05%; len=758; e=0.00E+00)	AESQTSSPNVSLE	2,3	3.622	0.7744	0.014915	1	2	2	2	2	S419	0.0185002	0.361469	0.730495	0.755378	0.701313	1	0.9941	5.21162e-05	FC	0.0826003	0.112951	0.954886	0.0457448	0.000749451
Pmi_521560_H2BL4_STRPU_Late_histone_H2B.L4|m.7575	S41	H2BL4_STRPU_Late_histone_H2B.L4	RKKRRESYNVYIY	2,3	3.266	0.6172	0.017252	1	7	6	6	1	S41	0.0238456	0.145052	0.543184	0.474739	0.886587	1	0.936364	0.00594549	FC	0.0295277	0.0928928	0.827311	0.0841726	0.0114715
PMI_002531; 2497|m.1307; PMI_017685	S242; S283; S892	XP_022090239.1 vacuolar protein sorting-associated protein 13D-like isoform X2 [Acanthaster planci] (id=88.36%; len=3584; e=0.00E+00) ; XP_022090237.1 vacuolar protein sorting-associated protein 13D-like isoform X1 [Acanthaster planci] (id=88.33%; len=300; e=2.03E-174) ; XP_022090237.1 vacuolar protein sorting-associated protein 13D-like isoform X1 [Acanthaster planci] (id=83.36%; len=1334; e=0.0…	SPQSPASPTEKMM; SPQSPASPTEKMM; SPQSPASPTEKMM	2	2.864	0.6498	0.184623	1	1	1	1		S242; S283; S892	0.0310649	0.16912	0.088255	0.205227	0.329067	1	0.997939	6.36413e-06	FC
Pmi_644313_no_annot|m.23846	S240	no_annot	GGGRSGSGGSPVP	2,3	1.703	0.4601	0.221026	1	1	1	2		S240	0.0125454	0.0235293	0.059066	0.383877	0.33028	1	0.998819	2.08982e-06	FC
Pmi_635650_OSBL8_HUMAN_Oxysterol-binding_protein-related_protein_8|m.21722; PMI_020892; 26276|m.19617	T78; T80; T78	OSBL8_HUMAN_Oxysterol-binding_protein-related_protein_8; XP_022082788.1 oxysterol-binding protein-related protein 8-like isoform X2 [Acanthaster planci] (id=89.29%; len=756; e=0.00E+00) ; XP_022082789.1 oxysterol-binding protein-related protein 8-like isoform X3 [Acanthaster planci] (id=96.74%; len=215; e=1.06E-146)	YGSSGTTPSKLSK; YGSSGTTPSKLSK; YGSSGTTPSKLSK	2,3	5.406	0.741	0.393431	1	2	2	2	3	T78; T80; T78	0.0310565	0.793875	0.550462	0.480041	0.365402	1	0.873746	0.0229038	FC	0.125018	0.319777	0.939333	0.000804043	0.0045565
Pmi_612910_REPS1_MOUSE_RalBP1-associated_Eps_domain-containing_protein_1|m.17183; PMI_008796	S207:S217; S201:S211	REPS1_MOUSE_RalBP1-associated_Eps_domain-containing_protein_1; XP_022098199.1 ralBP1-associated Eps domain-containing protein 1-like [Acanthaster planci] (id=77.26%; len=299; e=2.13E-137)	SSPRDSSPFNDNP,DNPPVISPNHPVG; SSPRDSSPFNDNP,DNPPVISPNHPVG	3	3.863	0.7613	0.40458	0.99743	2	1	2	1	S207:S217; S201:S211	0.0290261	0.427919	0.908018	0.85163	0.787847	0.982083	0.987239	0.000243244	FC	0.0515129	0.0963687	0.949898	0.0191281	0.000827853
Pmi_615160_ABR_MOUSE_Active_breakpoint_cluster_region-related_protein|m.17552	S152	ABR_MOUSE_Active_breakpoint_cluster_region-related_protein	LDTPRGSMEMDTD	4,5	2.139	0.5783	0.092621	1	1	4	3		S152	0.0124787	0.112879	0.484301	0.5593	0.799922	0.928498	0.895243	0.0158864	FC
73664|m.49212; PMI_009370; 73659|m.49208	S413; S654; S418	XP_022090178.1 run domain Beclin-1-interacting and cysteine-rich domain-containing protein-like isoform X2 [Acanthaster planci] (id=82.12%; len=425; e=0.00E+00) ; XP_022090170.1 uncharacterized protein LOC110979030 isoform X1 [Acanthaster planci] (id=71.33%; len=607; e=0.00E+00) ; XP_022090178.1 run domain Beclin-1-interacting and cysteine-rich domain-containing protein-like isoform X2 [Acanthast…	KQQLQTSPQDLDF; KQQLQTSPQDLDF; KQQLQTSPQDLDF	2,3	3.794	0.8091	0.554351	0.99999	2	3	3	1	S413; S654; S418	0.0231624	0.134475	0.519898	0.674003	0.685533	1	0.996459	1.87889e-05	FC	0.0549997	0.154457	0.895362	0.00118361	0.00873605
PMI_018123; Pmi_624541_TRPL_CAEEL_Transient-receptor-potential-like_protein|m.19351	S6; S6	XP_022111580.1 LOW QUALITY PROTEIN: transient-receptor-potential-like protein [Acanthaster planci] (id=86.22%; len=1038; e=0.00E+00) ; TRPL_CAEEL_Transient-receptor-potential-like_protein	-MRSSRSPTPVPP; -MRSSRSPTPVPP	3,4	4.348	0.7539	0.015928	0.99999	3	3	3	2	S6; S6	0.074383	0.607724	0.747216	0.716791	0.703821	1	0.924773	0.00827586	FC	0.227187	0.330069	0.879484	0.0880254	0.00925257
65332|m.43428; PMI_000688; Pmi_669141_CLSPN_HUMAN_Claspin|m.31378	T65; T211; T1204	XP_022090441.1 25S rRNA (cytosine-C(5))-methyltransferase nop2-like [Acanthaster planci] (id=79.31%; len=638; e=0.00E+00) ; XP_022090441.1 25S rRNA (cytosine-C(5))-methyltransferase nop2-like [Acanthaster planci] (id=65.53%; len=905; e=0.00E+00) ; CLSPN_HUMAN_Claspin	DNKEWLTPTSTKK; DNKEWLTPTSTKK; DNKEWLTPTSTKK	3,4,5	1.921	0.4982	0.05894	1	1	1	2		T65; T211; T1204	0.065484	0.728444	0.553874	0.766445	0.825035	0.960619	0.830574	0.040626	FC
64653|m.43017; Pmi_626704_LTOR1_RAT_Ragulator_complex_protein_LAMTOR1|m.19844	S17; S17	XP_022084504.1 ragulator complex protein LAMTOR1-like [Acanthaster planci] (id=92.77%; len=166; e=9.52E-108) ; LTOR1_RAT_Ragulator_complex_protein_LAMTOR1	KRTQVESPDERSR; KRTQVESPDERSR	2	1.625	0.3946	0.040435	1	5	3	4		S17; S17	0.0397936	0.45446	0.950418	0.90018	0.7363	0.991534	0.98891	0.000183792	FC
29110|m.21184; 29106|m.21182; PMI_003364	S220; S220; S239	XP_022092424.1 uncharacterized protein LOC110980240 isoform X1 [Acanthaster planci] (id=48.54%; len=377; e=4.83E-92) ; XP_022092424.1 uncharacterized protein LOC110980240 isoform X1 [Acanthaster planci] (id=48.94%; len=378; e=1.47E-93) ; XP_022092424.1 uncharacterized protein LOC110980240 isoform X1 [Acanthaster planci] (id=53.25%; len=308; e=6.79E-82)	QPSASVSPQQKTD; QPSASVSPQQKTD; QPSASVSPQQKTD	2,3,4	4.625	0.6912	0.074362	1	4	3	4		S220; S220; S239	0.0317263	0.493416	0.879519	0.821712	0.718101	1	0.986524	0.000271176	FC
77660|m.52074; 77667|m.52100; 77666|m.52092; 77652|m.52054	S351:S354; S351:S354; S262:S265; S262:S265	XP_022097945.1 vesicle-associated protein-like, partial [Acanthaster planci] (id=71.09%; len=640; e=0.00E+00) ; XP_022097945.1 vesicle-associated protein-like, partial [Acanthaster planci] (id=71.09%; len=640; e=0.00E+00) ; XP_022097945.1 vesicle-associated protein-like, partial [Acanthaster planci] (id=67.66%; len=535; e=6.52E-175) ; XP_022097945.1 vesicle-associated protein-like, partial [Acant…	LPKGNLSVESPGA,GNLSVESPGADVR; LPKGNLSVESPGA,GNLSVESPGADVR; LPKGNLSVESPGA,GNLSVESPGADVR; LPKGNLSVESPGA,GNLSVESPGADVR	2,3	2.928	0.642	0.059997	1	7	7	5		S351:S354; S351:S354; S262:S265; S262:S265	0.0157443	0.0942766	0.915369	0.860072	0.795542	0.992755	0.988252	0.00020622	FC
PMI_007707	T23	XP_022104012.1 ubiquitin carboxyl-terminal hydrolase 15-like [Acanthaster planci] (id=88.56%; len=769; e=0.00E+00)	ISELLKTPLKKGD	4	1.482	0.3871	0.166545	1	1	1	1		T23	0.0336857	0.233793	0.91316	0.911072	0.717323	1	0.981968	0.000484781	FC
Pmi_599401_SNPC1_MACFA_snRNA-activating_protein_complex_subunit_1|m.15097	T282:S288	SNPC1_MACFA_snRNA-activating_protein_complex_subunit_1	RRHRRQTGQLPAS,TGQLPASPDPPAP	2,3	3.254	0.705	0.135804	1	2	2	1	3	T282:S288	0.0299848	0.23415	0.584448	0.492322	0.712811	1	0.994414	4.67101e-05	FC	0.0351617	0.10609	0.978034	0.00219782	5.67573e-05
PMI_002331; Pmi_647780_HERC2_HUMAN_E3_ubiquitin-protein_ligase_HERC2|m.24701	S2503; S1024	XP_022098915.1 E3 ubiquitin-protein ligase HERC2-like [Acanthaster planci] (id=90.32%; len=2583; e=0.00E+00) ; HERC2_HUMAN_E3_ubiquitin-protein_ligase_HERC2	PIREIVSPSDTAA; PIREIVSPSDTAA	2,3	1.89	0.6185	0.56837	0.99999	1	1	2	4	S2503; S1024	0.0487963	0.546239	0.921764	0.850776	0.80325	1	0.991135	0.000117546	FC	0.0878889	0.138883	0.993682	0.0317179	1.30709e-05
82924|m.55639; PMI_010695; 82925|m.55641; Pmi_669821_C19L2_DANRE_CWF19-like_protein_2|m.31614	S360; S362; S362; S184	XP_022098964.1 centrosomal protein of 44 kDa-like isoform X1 [Acanthaster planci] (id=71.21%; len=594; e=0.00E+00) ; XP_022098964.1 centrosomal protein of 44 kDa-like isoform X1 [Acanthaster planci] (id=71.31%; len=596; e=0.00E+00) ; XP_022098964.1 centrosomal protein of 44 kDa-like isoform X1 [Acanthaster planci] (id=70.81%; len=596; e=0.00E+00) ; C19L2_DANRE_CWF19-like_protein_2	PNHTPSSAKSPLP; PNHTPSSAKSPLP; PNHTPSSAKSPLP; PNHTPSSAKSPLP	3	1.932	0.3913	0.255658	0.9977	1	1	2		S360; S362; S362; S184	0.0433555	0.122194	0.173972	0.524628	0.380491	1	0.946409	0.004231	FC
Pmi_667030_RTN1A_XENLA_Reticulon-1-A|m.30547; PMI_015057	S140; S140	RTN1A_XENLA_Reticulon-1-A; XP_022103647.1 reticulon-1-A-like isoform X1 [Acanthaster planci] (id=72.73%; len=418; e=6.71E-178)	TPTPPSSPAFGAL; TPTPPSSPAFGAL	3,4	5.402	0.7693	0.040635	0.99999	15	13	12	11	S140; S140	0.0201005	0.307082	0.776358	0.780278	0.684197	1	0.957134	0.00271692	FC	0.0287218	0.0929082	0.974772	0.0644189	0.00026872
PMI_008444; PMI_020645; 42540|m.28772	S224:S235; S257:S268; S272:S283	XP_022108322.1 upstream-binding protein 1-like isoform X1 [Acanthaster planci] (id=85.11%; len=477; e=0.00E+00) ; XP_022108322.1 upstream-binding protein 1-like isoform X1 [Acanthaster planci] (id=86.08%; len=510; e=0.00E+00) ; XP_022108322.1 upstream-binding protein 1-like isoform X1 [Acanthaster planci] (id=89.02%; len=510; e=0.00E+00)	NGKVPPSPSELDW,DWSLGQSPLMHKH; NGKVPPSPSELDW,DWSLGQSPLMHKH; NGKVPPSPSELDW,DWSLGQSPLMHKH	3	3.726	0.5888	0.006949	0.99997	2	3	3		S224:S235; S257:S268; S272:S283	0.0363408	0.799331	0.71504	0.894453	0.795226	0.983558	0.894931	0.0159792	FC
Pmi_625210_UBN2_HUMAN_Ubinuclein-2|m.19492	S67	UBN2_HUMAN_Ubinuclein-2	GNGPQKSFNELDE	3,4	4.212	0.6857	0.326481	1	3	2	3	2	S67	0.0243306	0.2489	0.892885	0.920889	0.907492	0.951522	0.989439	0.000166711	FC	0.0314806	0.106822	0.952836	0.0742068	0.000843559
Pmi_642831_TTC6_HUMAN_Tetratricopeptide_repeat_protein_6|m.23507; 17130|m.11789	T131; T66	TTC6_HUMAN_Tetratricopeptide_repeat_protein_6; XP_022099054.1 uncharacterized protein LOC110983798 isoform X2 [Acanthaster planci] (id=77.10%; len=131; e=1.56E-47)	VKVPGQTPSKEGD; VKVPGQTPSKEGD	3	2.105	0.504	0.054939	1	1	2	1		T131; T66	0.0326115	0.512749	0.939406	0.862636	0.759533	1	0.976134	0.000847602	FC
PMI_025998	S544:S547	XP_022102124.1 TBC1 domain family member 10A-like [Acanthaster planci] (id=80.51%; len=467; e=0.00E+00)	HRGTGESPGSPDT,TGESPGSPDTEKP	3,4	2.433	0.6293	0.167252	1	4	3	2		S544:S547	0.0270794	0.314354	0.838906	0.79829	0.730999	1	0.994797	4.05399e-05	FC
PMI_005514; Pmi_613451_ADGB_HUMAN_Androglobin|m.17259; PMI_000870	S1414; S580; S1535	XP_022081747.1 androglobin-like [Acanthaster planci] (id=83.00%; len=1735; e=0.00E+00) ; ADGB_HUMAN_Androglobin; XP_022081747.1 androglobin-like [Acanthaster planci] (id=80.10%; len=2065; e=0.00E+00)	SRASKGSTDRFEE; SRASKGSTDRFEE; SRASKGSTDRFEE	4	2.925	0.6513	0.750253	0.99573	1	1	1		S1414; S580; S1535	0.108835	0.221097	0.772972	0.784986	0.760788	0.997695	0.956522	0.00279443	FC
PMI_000966; Pmi_670400_HECD1_MOUSE_E3_ubiquitin-protein_ligase_HECTD1|m.31861	T133; T262	XP_022105219.1 E3 ubiquitin-protein ligase HECTD1-like [Acanthaster planci] (id=95.63%; len=1166; e=0.00E+00) ; HECD1_MOUSE_E3_ubiquitin-protein_ligase_HECTD1	AGATGTTPDSKGN; AGATGTTPDSKGN	2,3	2.952	0.6211	0.069123	1	2	2	2		T133; T262	0.0252174	0.197617	0.538855	0.528269	0.642714	1	0.990674	0.000130042	FC
Pmi_626430_PMYT1_XENLA_Membrane-associated_tyrosine-_and_threonine-s..CUT|m.19761; PMI_008112; PMI_015418	S93; S93; S96	PMYT1_XENLA_Membrane-associated_tyrosine-_and_threonine-s..CUT; BAB69973.1 Myt1 [Patiria pectinifera] (id=85.69%; len=608; e=0.00E+00) ; BAB69973.1 Myt1 [Patiria pectinifera] (id=93.48%; len=552; e=0.00E+00)	PHYNEKSTESFFN; PHYNEKSTESFFN; PHYNEKSTESFFN	2,3	4.561	0.653	0.396284	0.99807	1	2	2	1	S93; S93; S96	0.0350433	0.319764	0.839611	0.916537	0.64352	0.988981	0.960288	0.00233425	FC	0.185778	0.290832	0.877318	0.359759	0.00660787
Pmi_569820_NBEA_HUMAN_Neurobeachin|m.11366	S18	NBEA_HUMAN_Neurobeachin	KGVTPASPTVNMV	2,3	5.058	0.7372	0.074454	0.99549	2	2	2	2	S18	0.0425468	0.322865	0.77144	0.736253	0.842606	1	0.958545	0.00254211	FC	0.140693	0.240697	0.924565	0.116513	0.000198532
PMI_015752; Pmi_511001_SARM1_MOUSE_Sterile_alpha_and_TIR_motif-containing_protein_1|m.6778	S639:T640; S117:T118	XP_022106061.1 sterile alpha and TIR motif-containing protein 1-like isoform X1 [Acanthaster planci] (id=91.99%; len=662; e=0.00E+00) ; SARM1_MOUSE_Sterile_alpha_and_TIR_motif-containing_protein_1	KQSLKPSTPDANI,QSLKPSTPDANIQ; KQSLKPSTPDANI,QSLKPSTPDANIQ	3,4	4.189	0.7067	0.141464	1	4	2	3		S639:T640; S117:T118	0.0261391	0.10905	0.705096	0.710934	0.677866	1	0.982097	0.000477916	FC
PMI_000958; PMI_010908; Pmi_607620_F116B_HUMAN_Protein_FAM116B|m.16345	S241; S184; S235	XP_022099336.1 protein DENND6A-like [Acanthaster planci] (id=94.45%; len=559; e=0.00E+00) ; XP_022099336.1 protein DENND6A-like [Acanthaster planci] (id=92.71%; len=521; e=0.00E+00) ; F116B_HUMAN_Protein_FAM116B	KQDKPGSISAAVK; KQDKPGSISAAVK; KQDKPGSISAAVK	3,4	1.982	0.5057	0.130389	0.99999	2	1	1		S241; S184; S235	0.0406153	0.143878	0.653247	0.735644	0.8746	0.970361	0.992001	9.57306e-05	FC
PMI_026980; Pmi_475020_no_annot|m.4957	S211:S217; S102:S108	XP_022093588.1 MKL/myocardin-like protein 1 isoform X1 [Acanthaster planci] (id=84.82%; len=988; e=0.00E+00) ; no_annot	QRSSVSSPSQLLS,SPSQLLSPKAGQT; QRSSVSSPSQLLS,SPSQLLSPKAGQT	2,3	2.642	0.5545	0.746071	0.99354	1	1	3		S211:S217; S102:S108	0.00872898	0.16299	0.126459	0.146054	0.218845	1	0.99197	9.64624e-05	FC
35717|m.24918; PMI_027185; Pmi_626510_YRK_CHICK_Proto-oncogene_tyrosine-protein_kinase_Yrk|m.19772	S48; S33; S57	XP_022088016.1 tyrosine-protein kinase SRK2-like [Acanthaster planci] (id=64.63%; len=147; e=2.88E-55) ; XP_022088016.1 tyrosine-protein kinase SRK2-like [Acanthaster planci] (id=60.80%; len=125; e=2.60E-40) ; YRK_CHICK_Proto-oncogene_tyrosine-protein_kinase_Yrk	GYEPSSSPPAVVP; GYEPSSSPPAVVP; GYEPSSSPPAVVP	3,4	3.009	0.7217	0.109411	0.99999	3	3	2	4	S48; S33; S57	0.0441176	0.454317	0.839808	0.68379	0.724136	1	0.921184	0.00907323	FC	0.0761427	0.116111	0.996111	0.00690787	5.66082e-09
PMI_005722; Pmi_648790_CDAN1_MOUSE_Codanin-1|m.24943	T643; T943	XP_022105313.1 codanin-1-like [Acanthaster planci] (id=54.46%; len=1021; e=0.00E+00) ; CDAN1_MOUSE_Codanin-1	TPIAAKTPPQPIQ; TPIAAKTPPQPIQ	3,4	5.094	0.6406	0.519073	1	3	3	2		T643; T943	0.0364475	0.546006	0.884782	0.818151	0.737893	1	0.995873	2.55069e-05	FC
PMI_002394; PMI_010108; Pmi_653420_OCRL_HUMAN_Inositol_polyphosphate_5-phosphatase_OCRL-1|m.26263	S145; S38; S173	XP_022100456.1 inositol polyphosphate 5-phosphatase OCRL-1-like isoform X2 [Acanthaster planci] (id=69.29%; len=521; e=0.00E+00) ; XP_022100454.1 inositol polyphosphate 5-phosphatase OCRL-1-like isoform X1 [Acanthaster planci] (id=86.03%; len=594; e=0.00E+00) ; OCRL_HUMAN_Inositol_polyphosphate_5-phosphatase_OCRL-1	LMAALGSPKDPFE; LMAALGSPKDPFE; LMAALGSPKDPFE	3	3.166	0.6428	0.6188	1	1	1	1		S145; S38; S173	0.036881	0.284971	0.824707	0.854422	0.846779	0.931469	0.918277	0.00974503	FC
PMI_000263; PMI_006259; Pmi_670130_DNMT1_PARLI_DNA_(cytosine-5)-methyltransferase_PliMCI|m.31757; 83623|m.56119	S99; S122; S99; S99	AFR91943.1 DNA cytosine-5-methyltransferase 1 [Patiria pectinifera] (id=95.74%; len=1619; e=0.00E+00) ; AFR91943.1 DNA cytosine-5-methyltransferase 1 [Patiria pectinifera] (id=90.61%; len=330; e=0.00E+00) ; DNMT1_PARLI_DNA_(cytosine-5)-methyltransferase_PliMCI; AFR91943.1 DNA cytosine-5-methyltransferase 1 [Patiria pectinifera] (id=99.30%; len=143; e=1.46E-88)	VNGSVTSPPAKNG; VNGSVTSPPAKNG; VNGSVTSPPAKNG; VNGSVTSPPAKNG	4	1.665	0.4654	0.01957	0.99999	2	2	1	1	S99; S122; S99; S99	0.0249031	0.126203	0.415146	0.423489	0.545203	1	0.991481	0.000108544	FC	0.15956	0.213625	0.956702	0.00597476	0.00046576
16573|m.11284; Pmi_623390_no_annot|m.19124	S272; S272	XP_022086360.1 uncharacterized protein LOC110976941 [Acanthaster planci] (id=50.33%; len=449; e=3.17E-94) ; no_annot	RSIPTKSPSDEGD; RSIPTKSPSDEGD	3	1.992	0.5	0.712107	0.99997	1	1	1		S272; S272	0.051874	0.513158	0.86301	0.860541	0.786645	1	0.980947	0.000541046	FC
Pmi_644283_CI085_RAT_Uncharacterized_protein_C9orf85_homolog|m.23832; 45064|m.30265	S160:S162; S160:S162	CI085_RAT_Uncharacterized_protein_C9orf85_homolog; XP_022101248.1 histone H1.0-like [Acanthaster planci] (id=67.44%; len=258; e=1.68E-97)	PRARARSVSATPR,ARARSVSATPRVS; PRARARSVSATPR,ARARSVSATPRVS	2	1.294	0.4096	0.11519	1	3	2	1		S160:S162; S160:S162	0.0620578	0.663396	0.780987	0.951722	0.728622	1	0.988494	0.000197828	FC
PMI_014189	S1511	XP_022099229.1 roundabout homolog 2-like isoform X3 [Acanthaster planci] (id=69.75%; len=1534; e=0.00E+00)	IGDSDFSPPPVAL	4	2.684	0.4776	0.07534	1	1	1	1		S1511	0.0258816	0.46086	0.70057	0.866207	0.74388	1	0.983671	0.000397756	FC
PMI_018357; Pmi_580981_BIN1_HUMAN_Myc_box-dependent-interacting_protein_1|m.12658	S251:S256; S349:S354	XP_022084611.1 myc box-dependent-interacting protein 1-like [Acanthaster planci] (id=75.20%; len=367; e=2.74E-178) ; BIN1_HUMAN_Myc_box-dependent-interacting_protein_1	AAPPLASPETVSP,ASPETVSPNKSNS; AAPPLASPETVSP,ASPETVSPNKSNS	3	2.909	0.5744	0.295359	1	2	1	1		S251:S256; S349:S354	0.0920248	0.362665	0.803897	0.877123	0.713617	1	0.952307	0.00335772	FC
20738|m.15314; PMI_017593; 20740|m.15316	S125; S212; S125	XP_022105893.1 chromatin assembly factor 1 subunit A-like [Acanthaster planci] (id=67.91%; len=187; e=1.66E-65) ; XP_022105893.1 chromatin assembly factor 1 subunit A-like [Acanthaster planci] (id=71.72%; len=442; e=9.02E-165) ; XP_022105893.1 chromatin assembly factor 1 subunit A-like [Acanthaster planci] (id=69.83%; len=547; e=0.00E+00)	SRTSTPSVEKMQP; SRTSTPSVEKMQP; SRTSTPSVEKMQP	2	1.571	0.3902	0.283675	1	2	2	2		S125; S212; S125	0.028583	0.12322	0.625037	0.728542	0.788869	1	0.999061	1.32157e-06	FC
72916|m.48744; PMI_011417; 72919|m.48748; 72918|m.48747; PMI_027305; 72924|m.48756; Pmi_665270_HIRP3_HUMAN_HIRA-interacting_protein_3|m.29922	S374; S632; S375; S374; S632; S375; S346	XP_022096192.1 HIRA-interacting protein 3-like isoform X3 [Acanthaster planci] (id=47.57%; len=412; e=1.14E-78) ; XP_022096192.1 HIRA-interacting protein 3-like isoform X3 [Acanthaster planci] (id=45.68%; len=718; e=3.71E-127) ; XP_022096190.1 HIRA-interacting protein 3-like isoform X1 [Acanthaster planci] (id=50.00%; len=402; e=1.19E-78) ; XP_022096190.1 HIRA-interacting protein 3-like isoform X…	SRRRNVSSLYLKN; SRRRNVSSLYLKN; SRRRNVSSLYLKN; SRRRNVSSLYLKN; SRRRNVSSLYLKN; SRRRNVSSLYLKN; SRRRNVSSLYLKN	2	1.94	0.4624	0.002312	0.99862	2	2	1	1	S374; S632; S375; S374; S632; S375; S346	0.0270502	0.184334	0.327853	0.395573	0.293045	1	0.945687	0.00434481	FC	0.0235159	0.114017	0.944244	0.0226129	0.00125222
PMI_025174; Pmi_668941_PI42A_CHICK_Phosphatidylinositol_5-phosphate_4-kinase_ty..CUT|m.31246	S171:S172; S319:S320	XP_022096787.1 phosphatidylinositol 5-phosphate 4-kinase type-2 alpha-like [Acanthaster planci] (id=78.77%; len=292; e=1.42E-150) ; PI42A_CHICK_Phosphatidylinositol_5-phosphate_4-kinase_ty..CUT	GRQQLLSSGEYEF,RQQLLSSGEYEFD; GRQQLLSSGEYEF,RQQLLSSGEYEFD	4,5	5.693	0.5294	0.068695	0.99995	4	5	4		S171:S172; S319:S320	0.0818293	0.179028	0.791508	0.704751	0.721792	1	0.950309	0.00364241	FC
PMI_019825; PMI_004311; Pmi_659670_GDAP2_NEMVE_Protein_GDAP2_homolog|m.28146; 59164|m.39135; 59165|m.39137	S305; S305; S305; S305; S305	XP_022082021.1 protein GDAP2 homolog [Acanthaster planci] (id=82.90%; len=497; e=0.00E+00) ; XP_022082021.1 protein GDAP2 homolog [Acanthaster planci] (id=83.81%; len=315; e=0.00E+00) ; GDAP2_NEMVE_Protein_GDAP2_homolog; XP_022082021.1 protein GDAP2 homolog [Acanthaster planci] (id=87.12%; len=497; e=0.00E+00) ; XP_022082021.1 protein GDAP2 homolog [Acanthaster planci] (id=86.92%; len=497; e=0.00…	VTRPVLSPEEEKK; VTRPVLSPEEEKK; VTRPVLSPEEEKK; VTRPVLSPEEEKK; VTRPVLSPEEEKK	3	2.332	0.4734	0.502605	1	1	1	1		S305; S305; S305; S305; S305	0.0484159	0.251062	0.762959	0.840795	0.739786	1	0.967642	0.00155362	FC
68308|m.45566; Pmi_661270_KI67_HUMAN_Antigen_KI-67|m.29501; 68293|m.45529	T398:S400; T1374:S1376; T404:S406	XP_022080667.1 nascent polypeptide-associated complex subunit alpha, muscle-specific form-like [Acanthaster planci] (id=67.95%; len=468; e=9.49E-169) ; KI67_HUMAN_Antigen_KI-67; XP_022080667.1 nascent polypeptide-associated complex subunit alpha, muscle-specific form-like [Acanthaster planci] (id=69.87%; len=468; e=1.45E-170)	KESKIATPSPVKP,SKIATPSPVKPKR; KESKIATPSPVKP,SKIATPSPVKPKR; KESKIATPSPVKP,SKIATPSPVKPKR	2,3,4	1.793	0.5828	0.024731	1	4	4	4	4	T398:S400; T1374:S1376; T404:S406	0.0218264	0.763406	0.952118	0.697324	0.741308	0.956429	0.953477	0.00319619	FC	0.0224763	0.110171	0.970398	0.00506547	0.000481034
PMI_015243; Pmi_588191_TRIO_DANRE_Triple_functional_domain_protein|m.13524	S665:S669; S194:S198	XP_022094000.1 kalirin-like [Acanthaster planci] (id=84.38%; len=864; e=0.00E+00) ; TRIO_DANRE_Triple_functional_domain_protein	SGNRKVSLDSSPY,KVSLDSSPYRSRN; SGNRKVSLDSSPY,KVSLDSSPYRSRN	2	1.436	0.5652	0.112088	0.99493	1	1	1	1	S665:S669; S194:S198	0.044179	0.488702	0.884967	0.600336	0.931322	0.93204	0.951715	0.00344082	FC	0.082635	0.253675	0.935489	0.00954713	0.00136563
Pmi_670971_no_annot|m.32100	S203:T206	no_annot	SANVMNSPGTPKE,VMNSPGTPKEKGQ	2,3,4	3.032	0.6912	0.012472	1	19	19	19	3	S203:T206	0.0292531	0.248497	0.788969	0.780958	0.759605	1	0.98618	0.000285149	FC	0.0594206	0.102879	0.961645	0.012293	0.000238251
70811|m.47262; PMI_009837	S335; S301	XP_022090310.1 proteoglycan 4-like isoform X1 [Acanthaster planci] (id=66.74%; len=442; e=5.73E-116) ; XP_022090310.1 proteoglycan 4-like isoform X1 [Acanthaster planci] (id=68.63%; len=408; e=8.48E-110)	KSKVVPSPEPKAD; KSKVVPSPEPKAD	2	1.708	0.4941	0.17212	1	6	5	7	3	S335; S301	0.0333757	0.527199	0.911986	0.836372	0.741646	1	0.995421	3.14067e-05	FC	0.0417224	0.0799484	0.95954	0.00573749	0.000522183
17143|m.11801; Pmi_537550_no_annot|m.8625; PMI_011621	S63; S63; S19	XP_022084300.1 uncharacterized protein LOC110975810 isoform X1 [Acanthaster planci] (id=68.42%; len=133; e=3.40E-42) ; no_annot; XP_022084302.1 uncharacterized protein LOC110975810 isoform X3 [Acanthaster planci] (id=61.80%; len=89; e=1.15E-14)	KRKLNVSNNTTPS; KRKLNVSNNTTPS; KRKLNVSNNTTPS	2,3	1.985	0.4933	0.022815	0.99999	3	1	1		S63; S63; S19	0.0154239	0.136851	0.187045	0.580455	0.55999	1	0.994575	4.40685e-05	FC
Pmi_620820_GWL_XENTR_Serine/threonine-protein_kinase_greatwall|m.18617	S461:S465	GWL_XENTR_Serine/threonine-protein_kinase_greatwall	SGRSLASPGDSSD,LASPGDSSDKMLT	3	2.436	0.497	0.940029	0.99489	1	1	1		S461:S465	0.0157381	0.883906	0.65644	0.565841	0.635998	1	0.967144	0.00160158	FC
PMI_021921	S75	XP_022090109.1 tumor protein p63-regulated gene 1-like protein [Acanthaster planci] (id=89.67%; len=300; e=0.00E+00)	VRGRPKSAPLSPV	2,3	5.067	0.6784	0.284637	1	2	2	2	2	S75	0.0337988	0.111151	0.170379	0.35099	0.378662	1	0.992607	8.17815e-05	FC	0.0678682	0.217154	0.894608	0.0107784	0.00357216
PMI_019179; PMI_004517	S530:S534; S165:S169	XP_022092597.1 protein HID1-like isoform X1 [Acanthaster planci] (id=73.96%; len=845; e=0.00E+00) ; XP_022092600.1 protein HID1-like isoform X4 [Acanthaster planci] (id=85.57%; len=298; e=5.77E-161)	AAGGGGSPIGSPT,GGSPIGSPTGPIG; AAGGGGSPIGSPT,GGSPIGSPTGPIG	3,4,5	5.273	0.7809	0.124173	0.99997	5	5	4	3	S530:S534; S165:S169	0.0233369	0.389388	0.953353	0.876611	0.864815	0.961807	0.971555	0.00120215	FC	0.031577	0.0850616	0.962543	0.0408213	0.000724557
Pmi_668280_NUCL_XENLA_Nucleolin|m.31017; PMI_004795; 69228|m.46180; 69229|m.46182	S145; S202; S108; S251	NUCL_XENLA_Nucleolin; XP_022100610.1 nucleolin-like isoform X2 [Acanthaster planci] (id=60.74%; len=484; e=1.36E-143) ; XP_022100610.1 nucleolin-like isoform X2 [Acanthaster planci] (id=71.75%; len=446; e=0.00E+00) ; XP_022100610.1 nucleolin-like isoform X2 [Acanthaster planci] (id=63.83%; len=669; e=0.00E+00)	KKKKMPSGEAKTT; KKKKMPSGEAKTT; KKKKMPSGEAKTT; KKKKMPSGEAKTT	2,3	1.371	0.36	0.171453	1	4	8	3		S145; S202; S108; S251	0.0493632	0.0689829	0.153873	0.264796	0.416762	1	0.986352	0.000278147	FC
PMI_012213; 59075|m.39106; PMI_012867	S342; S214; S140	XP_022084218.1 rab GTPase-activating protein 1-like isoform X1 [Acanthaster planci] (id=88.60%; len=658; e=0.00E+00) ; XP_022084220.1 rab GTPase-activating protein 1-like isoform X2 [Acanthaster planci] (id=93.87%; len=995; e=0.00E+00) ; XP_022084220.1 rab GTPase-activating protein 1-like isoform X2 [Acanthaster planci] (id=91.52%; len=460; e=0.00E+00)	APGTLASPRETLM; APGTLASPRETLM; APGTLASPRETLM	2,3	3.795	0.7441	0.109393	1	5	4	3	4	S342; S214; S140	0.0325722	0.333335	0.844353	0.771271	0.708702	1	0.995031	3.69747e-05	FC	0.114283	0.165147	0.992865	0.0583735	1.79836e-06
PMI_000314; PMI_001023; Pmi_656960_USP9X_HUMAN_Probable_ubiquitin_carboxyl-terminal_hydrolas..CUT|m.27281	S1180:S1185; S1473:S1478; S1564:S1569	XP_022093743.1 probable ubiquitin carboxyl-terminal hydrolase FAF-X isoform X2 [Acanthaster planci] (id=88.41%; len=2244; e=0.00E+00) ; XP_022093743.1 probable ubiquitin carboxyl-terminal hydrolase FAF-X isoform X2 [Acanthaster planci] (id=85.42%; len=2016; e=0.00E+00) ; USP9X_HUMAN_Probable_ubiquitin_carboxyl-terminal_hydrolas..CUT	NIDVGDSEHGGSP,DSEHGGSPEGQTN; NIDVGDSEHGGSP,DSEHGGSPEGQTN; NIDVGDSEHGGSP,DSEHGGSPEGQTN	3,4	3.552	0.6576	0.363101	1	2	2	2	1	S1180:S1185; S1473:S1478; S1564:S1569	0.0839601	0.158252	0.430711	0.557197	0.633892	1	0.959901	0.00237968	FC	0.624381	0.707773	0.919395	0.321302	0.0138498
PMI_029451; Pmi_639992_no_annot|m.22691	S373:S376:S379; S397:S400:S403	XP_022079315.1 neurabin-1-like isoform X6 [Acanthaster planci] (id=78.71%; len=620; e=0.00E+00) ; no_annot	YIENRKSPVSPTS,NRKSPVSPTSPIA,SPVSPTSPIAKKP; YIENRKSPVSPTS,NRKSPVSPTSPIA,SPVSPTSPIAKKP	2,3,4	3.532	0.5524	0.074976	0.99813	3	2	3		S373:S376:S379; S397:S400:S403	0.0332791	0.424844	0.865497	0.840897	0.749684	1	0.983239	0.000419041	FC
Pmi_634400_UBE3A_HUMAN_Ubiquitin-protein_ligase_E3A|m.21415; PMI_013285; 64836|m.43125	S28; S28; S28	UBE3A_HUMAN_Ubiquitin-protein_ligase_E3A; XP_022103087.1 ubiquitin-protein ligase E3A-like [Acanthaster planci] (id=84.58%; len=960; e=0.00E+00) ; XP_022103087.1 ubiquitin-protein ligase E3A-like [Acanthaster planci] (id=84.27%; len=960; e=0.00E+00)	QRSPATSPDDMKR; QRSPATSPDDMKR; QRSPATSPDDMKR	2,3	1.7	0.5777	0.038661	0.99779	4	3	6	3	S28; S28; S28	0.0332183	0.369806	0.722877	0.74934	0.782337	1	0.987567	0.000230895	FC	0.0376871	0.0863499	0.977778	0.0470241	0.000114237
45064|m.30265; Pmi_644283_CI085_RAT_Uncharacterized_protein_C9orf85_homolog|m.23832	S160; S160	XP_022101248.1 histone H1.0-like [Acanthaster planci] (id=67.44%; len=258; e=1.68E-97) ; CI085_RAT_Uncharacterized_protein_C9orf85_homolog	PRARARSVSATPR; PRARARSVSATPR	2	1.59	0.4895	0.034794	0.99729	2	2	3		S160; S160	0.045165	0.565942	0.487057	0.564092	0.708883	1	0.942725	0.0048267	FC
PMI_000024; PMI_000876	S2769; S2858	XP_022110484.1 hydrocephalus-inducing protein homolog, partial [Acanthaster planci] (id=87.31%; len=3019; e=0.00E+00) ; XP_011665894.1 PREDICTED: hydrocephalus-inducing protein homolog [Strongylocentrotus purpuratus] (id=66.72%; len=5219; e=0.00E+00)	VDQEPDSSTPDKA; VDQEPDSSTPDKA	3,4	1.983	0.5618	0.375987	0.99463	1	1	1		S2769; S2858	0.146811	0.485156	0.842965	0.789171	0.768908	1	0.925595	0.0080983	FC
PMI_003499	S31	XP_022091054.1 transmembrane and coiled-coil domains protein 2-like isoform X1 [Acanthaster planci] (id=70.24%; len=719; e=0.00E+00)	RSAEDLSPNSIPN	3,4	3.557	0.7321	0.842981	0.99998	2	1	1		S31	0.0229386	0.0487151	0.0924491	0.752849	0.675037	1	0.970993	0.00124987	FC
PMI_009832; Background_Pmi_618570_DCTD_PONAB_Deoxycytidylate_deaminase|m.18263	T123:T136:S137; T162:T175:S176	XP_022090346.1 nuclease-sensitive element-binding protein 1-like [Acanthaster planci] (id=80.64%; len=279; e=1.19E-89) ; DCTD_PONAB_Deoxycytidylate_deaminase	YRRRKNTDDPDED,QEEEGGTSEGGDN,EEEGGTSEGGDNP; YRRRKNTDDPDED,QEEEGGTSEGGDN,EEEGGTSEGGDNP	3,4	4.705	0.7866	0.03549	1	7	6	11	4	T123:T136:S137; T162:T175:S176	0.040428	0.221272	0.592358	0.658255	0.653423	1	0.977947	0.000724118	FC	0.104488	0.271701	0.964735	0.0128078	0.00104608
PMI_012867; PMI_012213; 59075|m.39106	S127:S140; S329:S342; S201:S214	XP_022084220.1 rab GTPase-activating protein 1-like isoform X2 [Acanthaster planci] (id=91.52%; len=460; e=0.00E+00) ; XP_022084218.1 rab GTPase-activating protein 1-like isoform X1 [Acanthaster planci] (id=88.60%; len=658; e=0.00E+00) ; XP_022084220.1 rab GTPase-activating protein 1-like isoform X2 [Acanthaster planci] (id=93.87%; len=995; e=0.00E+00)	FHRVPRSPGLVDS,APGTLASPRETLM; FHRVPRSPGLVDS,APGTLASPRETLM; FHRVPRSPGLVDS,APGTLASPRETLM	2,3	3.54	0.6886	0.078698	1	6	4	6	5	S127:S140; S329:S342; S201:S214	0.0414916	0.210457	0.915501	0.874291	0.845973	0.995611	0.97006	0.00133118	FC	0.113377	0.201445	0.89577	0.217324	0.000437308
PMI_014316; 76382|m.50961	S307; S270	XP_022107252.1 transmembrane protein 115-like [Acanthaster planci] (id=78.09%; len=397; e=0.00E+00) ; XP_022107252.1 transmembrane protein 115-like [Acanthaster planci] (id=85.63%; len=355; e=0.00E+00)	YDVGAPSPININL; YDVGAPSPININL	3,4	4.747	0.804	0.05434	1	7	5	6	6	S307; S270	0.0353593	0.388926	0.892011	0.788888	0.812319	1	0.967743	0.00154403	FC	0.0522747	0.116224	0.959184	0.0927378	0.000662906
PMI_004322; PMI_012164	S269; S269	XP_022086734.1 rac GTPase-activating protein 1-like isoform X2 [Acanthaster planci] (id=85.90%; len=695; e=0.00E+00) ; XP_022086734.1 rac GTPase-activating protein 1-like isoform X2 [Acanthaster planci] (id=85.13%; len=632; e=0.00E+00)	SRELLKSGDHNVS; SRELLKSGDHNVS	3,4,5	4.861	0.8072	0.284142	1	2	4	6		S269; S269	0.0325428	0.168216	0.316579	0.328725	0.552818	1	0.939328	0.00541001	FC
Pmi_638550_HEXP_LEIMA_DNA-binding_protein_HEXBP|m.22375; 65710|m.43707	Y153; Y153	HEXP_LEIMA_DNA-binding_protein_HEXBP; XP_022098836.1 DNA-binding protein HEXBP-like isoform X2 [Acanthaster planci] (id=61.91%; len=210; e=7.13E-77)	GSGVVCYKCGKEG; GSGVVCYKCGKEG	2,3	3.689	0.5991	0.08788	1	1	2	1		Y153; Y153	0.0567144	0.190594	0.788197	0.814268	0.796584	1	0.991884	9.85363e-05	FC
65999|m.43927; Pmi_658860_DZAN1_MOUSE_Double_zinc_ribbon_and_ankyrin_repeat-contai..CUT|m.27907; PMI_004248; PMI_026056	S494; S494; S495; S56	XP_022097977.1 double zinc ribbon and ankyrin repeat-containing protein 1-like isoform X4 [Acanthaster planci] (id=90.86%; len=525; e=0.00E+00) ; DZAN1_MOUSE_Double_zinc_ribbon_and_ankyrin_repeat-contai..CUT; XP_022097977.1 double zinc ribbon and ankyrin repeat-containing protein 1-like isoform X4 [Acanthaster planci] (id=89.49%; len=771; e=0.00E+00) ; XP_022097977.1 double zinc ribbon and ankyri…	PVLTAISPGKGYW; PVLTAISPGKGYW; PVLTAISPGKGYW; PVLTAISPGKGYW	3,4	3.895	0.7201	0.397936	1	2	1	1		S494; S494; S495; S56	0.0349589	0.417185	0.937739	0.932831	0.778251	0.962195	0.974361	0.000977626	FC
PMI_014055	S263	XP_022081499.1 DALR anticodon-binding domain-containing protein 3-like [Acanthaster planci] (id=70.05%; len=611; e=0.00E+00)	SEDDPSSPNPAEI	2,3	3.089	0.6706	0.402	1	2	2	2		S263	0.0846153	0.259966	0.765287	0.802643	0.763138	1	0.997886	6.7003e-06	FC
Pmi_656090_TTK_MOUSE_Dual_specificity_protein_kinase_TTK|m.27053; 69985|m.46752; PMI_010389; PMI_014882; 69986|m.46753	S384; S336; S375; S400; S384	TTK_MOUSE_Dual_specificity_protein_kinase_TTK; XP_022098186.1 dual specificity protein kinase TTK-like [Acanthaster planci] (id=75.31%; len=243; e=1.80E-115) ; XP_022098186.1 dual specificity protein kinase TTK-like [Acanthaster planci] (id=78.22%; len=583; e=0.00E+00) ; XP_022098186.1 dual specificity protein kinase TTK-like [Acanthaster planci] (id=83.03%; len=554; e=0.00E+00) ; XP_022098186.1 …	PLEKTVSPGEDKS; PLEKTVSPGEDKS; PLEKTVSPGEDKS; PLEKTVSPGEDKS; PLEKTVSPGEDKS	2,3	1.582	0.5131	0.169534	1	3	1	2	3	S384; S336; S375; S400; S384	0.037639	0.379591	0.856416	0.779135	0.748274	1	0.995203	3.44677e-05	FC	0.0786619	0.156986	0.946482	0.037999	0.000934864
59180|m.39144	S162	XP_022086859.1 ATP-binding cassette sub-family D member 4-like [Acanthaster planci] (id=76.36%; len=423; e=0.00E+00)	TKANYGSPVQLPD	2,3	2.268	0.689	0.247117	1	3	1	1		S162	0.0599807	0.534728	0.864609	0.770268	0.729497	0.99606	0.881247	0.0203162	FC
Pmi_658030_no_annot|m.27608; PMI_013840; PMI_018276	S390; S404; S379	no_annot; XP_022086611.1 uncharacterized protein LOC110977099 isoform X2 [Acanthaster planci] (id=85.49%; len=896; e=0.00E+00) ; XP_022086611.1 uncharacterized protein LOC110977099 isoform X2 [Acanthaster planci] (id=84.75%; len=872; e=0.00E+00)	VAFKEPSPAGGSS; VAFKEPSPAGGSS; VAFKEPSPAGGSS	2,3	3.494	0.745	0.014452	1	4	4	4	1	S390; S404; S379	0.0357493	0.701908	0.720098	0.595837	0.736258	1	0.927704	0.00765112	FC	0.0463767	0.132054	0.933536	0.018876	0.00378039
Pmi_579670_CAMP2_MOUSE_Calmodulin-regulated_spectrin-associated_protein_2|m.12513; PMI_022298	S59; S452	CAMP2_MOUSE_Calmodulin-regulated_spectrin-associated_protein_2; XP_022091168.1 calmodulin-regulated spectrin-associated protein 1-like isoform X2 [Acanthaster planci] (id=74.00%; len=1965; e=0.00E+00)	QTFGTLSPGDGPA; QTFGTLSPGDGPA	2,3	4.126	0.7085	0.352332	1	3	2	2	3	S59; S452	0.0677468	0.528366	0.876008	0.926625	0.676216	1	0.987496	0.000233558	FC	0.249761	0.351867	0.917926	0.141856	0.000989559
PMI_006465	S379	XP_022086859.1 ATP-binding cassette sub-family D member 4-like [Acanthaster planci] (id=76.85%; len=445; e=0.00E+00)	TKANYGSPVQLPD	2,3	2.268	0.689	0.616856	1	3	2	2		S379	0.0602635	0.563063	0.882238	0.791454	0.744398	1	0.928508	0.00748396	FC
Pmi_588870_TWF1_PONAB_Twinfilin-1|m.13618; PMI_014176	S172; S148	TWF1_PONAB_Twinfilin-1; XP_022081317.1 twinfilin-2-A-like [Acanthaster planci] (id=66.38%; len=348; e=1.42E-146)	GPTDIGSSTKQSH; GPTDIGSSTKQSH	2,3	2.802	0.6588	0.004071	0.99804	5	5	4	9	S172; S148	0.0313749	0.363017	0.558898	0.20645	0.367129	1	0.996188	2.17739e-05	FC	0.0238273	0.0605741	0.955065	0.0189865	0.000540168
PMI_000182	T998	XP_022099054.1 uncharacterized protein LOC110983798 isoform X2 [Acanthaster planci] (id=79.72%; len=1366; e=0.00E+00)	VKVPGQTPSKEGD	3,4	2.596	0.5663	0.054939	1	3	2	3		T998	0.0404541	0.525577	0.975004	0.90376	0.767935	0.990415	0.987671	0.000227084	FC
46510|m.31129; 46511|m.31132; PMI_020469; Pmi_668970_ANO39_ASTPE_Nucleoplasmin-like_protein_ANO39|m.31287	S158:S160; S158:S160; S119:S121; S158:S160	sp|Q9NLA3.1|ANO39_PATPE RecName: Full=Nucleoplasmin-like protein ANO39; AltName: Full=39 kDa oocyte-expressed nucleolar protein; AltName: Full=Nucleic acid-associated protein 36; AltName: Full=Nucleic acid-binding nuclear protein; Short=NAAP; Short=NAAP1; Short=NAAP2 (id=96.82%; len=346; e=0.00E+00) ; sp|Q9NLA3.1|ANO39_PATPE RecName: Full=Nucleoplasmin-like protein ANO39; AltName: Full=39 kDa ooc…	SKKRPLSTSDGTA,KRPLSTSDGTAKK; SKKRPLSTSDGTA,KRPLSTSDGTAKK; SKKRPLSTSDGTA,KRPLSTSDGTAKK; SKKRPLSTSDGTA,KRPLSTSDGTAKK	2,3,4	2.481	0.5804	0.474843	0.99782	2	2	6		S158:S160; S158:S160; S119:S121; S158:S160	0.0301376	0.225275	0.806619	0.57701	0.658552	0.852888	0.812024	0.0496814	FC
PMI_025276; Pmi_633890_RAB8A_MOUSE_Ras-related_protein_Rab-8A|m.21319	S89; S194	XP_022090884.1 ras-related protein Rab-8A-like [Acanthaster planci] (id=76.74%; len=129; e=1.62E-58) ; RAB8A_MOUSE_Ras-related_protein_Rab-8A	GQGKGSSPVQVSG; GQGKGSSPVQVSG	2,3,4	4.572	0.6865	0.019123	1	2	3	3	2	S89; S194	0.0505193	0.362295	0.815754	0.763765	0.738173	1	0.98938	0.000168584	FC	0.0892007	0.118684	0.971547	0.0391481	0.000540015
PMI_013589	S189	XP_022108953.1 uncharacterized protein LOC110989113 [Acanthaster planci] (id=57.41%; len=263; e=1.35E-76)	PTIAISSPGPAIE	3,4	5.129	0.7029	0.017641	1	14	14	14		S189	0.054275	0.689752	0.79182	0.769746	0.711792	1	0.959773	0.00239483	FC
PMI_011519; PMI_024033; Pmi_625571_KITH_CHICK_Thymidine_kinase,_cytosolic|m.19574	S227; S227; S267	XP_022080425.1 thymidine kinase, cytosolic-like [Acanthaster planci] (id=82.84%; len=239; e=1.11E-145) ; XP_022080425.1 thymidine kinase, cytosolic-like [Acanthaster planci] (id=82.84%; len=239; e=1.35E-145) ; KITH_CHICK_Thymidine_kinase,_cytosolic	GRKLFQSPKKIAV; GRKLFQSPKKIAV; GRKLFQSPKKIAV	3	1.13	0.3627	1.70988	1	1	1	1		S227; S227; S267	0.0357324	0.0711293	0.210735	0.251692	0.358386	1	0.994758	4.11518e-05	FC
82096|m.55115; Pmi_671170_TDRD1_DANRE_Tudor_domain-containing_protein_1|m.32126	S335; S901	XP_022107965.1 uncharacterized protein LOC110988589 [Acanthaster planci] (id=65.84%; len=1657; e=0.00E+00) ; TDRD1_DANRE_Tudor_domain-containing_protein_1	KTIRFASESDNLQ; KTIRFASESDNLQ	2,3,4	4.973	0.7475	0.007612	1	18	22	20	23	S335; S901	0.0400804	0.178382	0.763383	0.865104	0.735485	1	0.997136	1.2294e-05	FC	0.0843597	0.237754	0.961613	0.0078378	0.000992653
PMI_028497; Pmi_663380_PP2BA_HUMAN_Serine/threonine-protein_phosphatase_2B_cata..CUT|m.29365	S128; S520	XP_022092734.1 serine/threonine-protein phosphatase 2B catalytic subunit alpha isoform-like isoform X2 [Acanthaster planci] (id=96.58%; len=117; e=4.57E-72) ; PP2BA_HUMAN_Serine/threonine-protein_phosphatase_2B_cata..CUT	MPPRKDSPTPPNN; MPPRKDSPTPPNN	2,3	3.045	0.6936	0.026308	0.99999	3	4	4	6	S128; S520	0.0322532	0.240061	0.926821	0.775988	0.715069	0.990873	0.978939	0.000660701	FC	0.158123	0.211074	0.963282	0.00548217	0.000115666
PMI_015893; PMI_005565	S15; S15	XP_022110175.1 uncharacterized protein LOC110989830 [Acanthaster planci] (id=64.45%; len=661; e=0.00E+00) ; XP_022110175.1 uncharacterized protein LOC110989830 [Acanthaster planci] (id=70.92%; len=1919; e=0.00E+00)	TKQGVVSPGGDSA; TKQGVVSPGGDSA	3,4,5	5.804	0.7952	0.022321	1	4	5	6	7	S15; S15	0.034458	0.654253	0.860646	0.85925	0.798244	0.983681	0.991217	0.000115377	FC	0.0496749	0.0975912	0.918296	0.0687637	0.00310403
Pmi_591920_AIFM3_HUMAN_Apoptosis-inducing_factor_3|m.14022; PMI_015090	S26; S26	AIFM3_HUMAN_Apoptosis-inducing_factor_3; XP_022104629.1 apoptosis-inducing factor 3-like [Acanthaster planci] (id=60.00%; len=60; e=4.05E-10)	DSGGNQSPVGKDG; DSGGNQSPVGKDG	3,4,5	5.056	0.7577	0.001038	1	7	12	7	4	S26; S26	0.039125	0.500122	0.845858	0.821979	0.716364	1	0.989953	0.00015092	FC	0.0749324	0.134308	0.937863	0.0194181	0.00122425
Pmi_589660_NU214_HUMAN_Nuclear_pore_complex_protein_Nup214|m.13723; PMI_001625	S404; S1017	NU214_HUMAN_Nuclear_pore_complex_protein_Nup214; XP_022085278.1 nuclear pore complex protein Nup214-like [Acanthaster planci] (id=58.91%; len=1475; e=0.00E+00)	AISTPVSSKKQAQ; AISTPVSSKKQAQ	2	1.756	0.4425	0.439406	0.99848	1	1	1		S404; S1017	0.036553	0.383843	0.402734	0.737893	0.822059	1	0.975971	0.000859168	FC
Pmi_657711_SPEF2_HUMAN_Sperm_flagellar_protein_2|m.27520; PMI_001182; PMI_007038	T1376; T1575; T299	SPEF2_HUMAN_Sperm_flagellar_protein_2; XP_022100240.1 sperm flagellar protein 2-like isoform X1 [Acanthaster planci] (id=76.03%; len=1481; e=0.00E+00) ; XP_022100240.1 sperm flagellar protein 2-like isoform X1 [Acanthaster planci] (id=89.94%; len=895; e=0.00E+00)	LVPRRPTSTEGFF; LVPRRPTSTEGFF; LVPRRPTSTEGFF	2,3,4	2.982	0.7088	0.163405	0.99693	1	2	1	1	T1376; T1575; T299	0.0371688	0.122082	0.57105	0.764415	0.823568	1	0.995688	2.78501e-05	FC	0.0621645	0.18854	0.927651	4.9517e-05	0.00236829
Pmi_631600_KIF4A_HUMAN_Chromosome-associated_kinesin_KIF4A|m.20811; PMI_004787	S936; S1467	KIF4A_HUMAN_Chromosome-associated_kinesin_KIF4A; XP_022086353.1 chromosome-associated kinesin KIF4A-like [Acanthaster planci] (id=70.34%; len=1450; e=0.00E+00)	FKPLTDS------; FKPLTDS------	2,3,4	4.791	0.8107	0.067226	1	6	6	5	1	S936; S1467	0.0473423	0.220245	0.287306	0.327298	0.369029	1	0.982669	0.000447938	FC	0.951417	0.447986	0.265324	0.00140144	0.00210949
PMI_004537; Pmi_653591_NDRG3_HUMAN_Protein_NDRG3|m.26273; PMI_023648; 61016|m.40432; 61014|m.40429	S67; S67; S67; S67; S67	XP_022083947.1 protein NDRG3-like isoform X2 [Acanthaster planci] (id=65.59%; len=404; e=0.00E+00) ; NDRG3_HUMAN_Protein_NDRG3; XP_022083947.1 protein NDRG3-like isoform X2 [Acanthaster planci] (id=86.63%; len=404; e=0.00E+00) ; XP_022083951.1 protein NDRG3-like isoform X6 [Acanthaster planci] (id=72.82%; len=103; e=2.71E-43) ; XP_022083947.1 protein NDRG3-like isoform X2 [Acanthaster planci] (id…	FEGTTKSPLLTDD; FEGTTKSPLLTDD; FEGTTKSPLLTDD; FEGTTKSPLLTDD; FEGTTKSPLLTDD	2,3,4	5.258	0.6822	0.341818	1	3	3	3	1	S67; S67; S67; S67; S67	0.0405953	0.285828	0.728044	0.776184	0.842535	1	0.985168	0.000328344	FC	0.0470218	0.101857	0.911976	0.064592	0.0023729
77667|m.52100; 77661|m.52082; 77652|m.52054; 77666|m.52092; 77660|m.52074	S799; S123; S765; S710; S854	XP_022097945.1 vesicle-associated protein-like, partial [Acanthaster planci] (id=71.09%; len=640; e=0.00E+00) ; XP_022097947.1 neuroblast differentiation-associated protein AHNAK-like [Acanthaster planci] (id=42.76%; len=856; e=1.78E-125) ; XP_022097945.1 vesicle-associated protein-like, partial [Acanthaster planci] (id=67.66%; len=535; e=2.93E-174) ; XP_022097945.1 vesicle-associated protein-lik…	PKGGISSPDIDVP; PKGGISSPDIDVP; PKGGISSPDIDVP; PKGGISSPDIDVP; PKGGISSPDIDVP	3,4,5	4.755	0.751	0.04103	0.99999	11	13	12	6	S799; S123; S765; S710; S854	0.0706512	0.25173	0.880802	0.916322	0.804208	1	0.991176	0.000116443	FC	0.0337346	0.0911186	0.904348	0.0744906	0.00453279
Pmi_622153_ANKL2_MOUSE_Ankyrin_repeat_and_LEM_domain-containing_protein_2|m.18886; 65418|m.43524; PMI_002165	S506; S132; S711	ANKL2_MOUSE_Ankyrin_repeat_and_LEM_domain-containing_protein_2; XP_022091551.1 ankyrin repeat and LEM domain-containing protein 2-like isoform X2 [Acanthaster planci] (id=28.68%; len=129; e=3.00E-01) ; XP_022091550.1 ankyrin repeat and LEM domain-containing protein 2-like isoform X1 [Acanthaster planci] (id=61.69%; len=757; e=0.00E+00)	VCQSKISPQAPLC; VCQSKISPQAPLC; VCQSKISPQAPLC	2,3	3.264	0.6244	0.127934	1	4	4	4		S506; S132; S711	0.024179	0.484986	0.962588	0.721608	0.711243	0.964697	0.9227	0.00873199	FC
57874|m.38296; 57870|m.38286; Pmi_669370_GEMI5_HUMAN_Gem-associated_protein_5|m.31433	S276; S121; S1623	XP_022084839.1 gem-associated protein 5-like isoform X2 [Acanthaster planci] (id=48.13%; len=507; e=1.56E-111) ; XP_022084838.1 gem-associated protein 5-like isoform X1 [Acanthaster planci] (id=48.56%; len=348; e=2.19E-71) ; GEMI5_HUMAN_Gem-associated_protein_5	EADFDTSAHEKNS; EADFDTSAHEKNS; EADFDTSAHEKNS	2,3	2.283	0.5788	0.062299	0.99998	2	2	2		S276; S121; S1623	0.0734696	0.473959	0.972902	0.88956	0.794792	0.974047	0.990214	0.00014318	FC
70811|m.47262; PMI_009837; Pmi_667390_no_annot|m.30670	S157; S123; S334	XP_022090310.1 proteoglycan 4-like isoform X1 [Acanthaster planci] (id=66.74%; len=442; e=5.73E-116) ; XP_022090310.1 proteoglycan 4-like isoform X1 [Acanthaster planci] (id=68.63%; len=408; e=8.48E-110) ; no_annot	QKSPPSSPQDSSA; QKSPPSSPQDSSA; QKSPPSSPQDSSA	2,3,4	2.611	0.5869	0.003697	0.99999	5	3	4	1	S157; S123; S334	0.0554796	0.648221	0.854778	0.828379	0.760548	1	0.980498	0.000566788	FC	0.16188	0.197492	0.997431	0.177729	2.43935e-07
PMI_005374; Pmi_670100_FRY_HUMAN_Protein_furry_homolog|m.31750; PMI_022901; 21092|m.15723	S323; S2442; S308; S918	XP_022079670.1 LOW QUALITY PROTEIN: protein furry homolog-like [Acanthaster planci] (id=80.93%; len=367; e=2.22E-173) ; FRY_HUMAN_Protein_furry_homolog; XP_022079670.1 LOW QUALITY PROTEIN: protein furry homolog-like [Acanthaster planci] (id=76.15%; len=369; e=1.58E-157) ; XP_022079670.1 LOW QUALITY PROTEIN: protein furry homolog-like [Acanthaster planci] (id=88.79%; len=972; e=0.00E+00)	GSLRIRSTDDPLI; GSLRIRSTDDPLI; GSLRIRSTDDPLI; GSLRIRSTDDPLI	2,3,4	6.112	0.7799	0.03166	1	7	5	5	4	S323; S2442; S308; S918	0.0453378	0.292948	0.838787	0.876118	0.870225	0.995128	0.981868	0.000490199	FC	0.186969	0.350627	0.933033	0.0138281	0.00172734
63670|m.42096; 63669|m.42095; PMI_022226; Pmi_653522_CDC6_MOUSE_Cell_division_control_protein_6_homolog|m.26282; PMI_004071	T193; T193; T193; T193; T73	BAH83663.1 cell division cycle 6 [Patiria pectinifera] (id=95.47%; len=618; e=0.00E+00) ; BAH83663.1 cell division cycle 6 [Patiria pectinifera] (id=95.79%; len=618; e=0.00E+00) ; BAH83663.1 cell division cycle 6 [Patiria pectinifera] (id=92.56%; len=618; e=0.00E+00) ; CDC6_MOUSE_Cell_division_control_protein_6_homolog; BAH83663.1 cell division cycle 6 [Patiria pectinifera] (id=86.14%; len=498; e…	SPRKTVTPLKLER; SPRKTVTPLKLER; SPRKTVTPLKLER; SPRKTVTPLKLER; SPRKTVTPLKLER	3,4	2.073	0.5078	1.12201	1	2	2	3		T193; T193; T193; T193; T73	0.0363356	0.278475	0.614043	0.323885	0.801112	1	0.98978	0.000156129	FC
PMI_000138	S22	XP_022080005.1 transient-receptor-potential-like protein [Acanthaster planci] (id=42.84%; len=740; e=0.00E+00)	LTIPDVSPTKSIT	2,3,4	2.755	0.6519	0.020896	1	9	12	12	11	S22	0.0366633	0.583665	0.858962	0.787125	0.709539	1	0.992333	8.79595e-05	FC	0.0346718	0.0802394	0.988253	0.0333334	3.03802e-05
Pmi_629070_TRPG_DROME_Transient_receptor_potential-gamma_protein|m.20297; 15467|m.10284	S22; S22	TRPG_DROME_Transient_receptor_potential-gamma_protein; XP_022080005.1 transient-receptor-potential-like protein [Acanthaster planci] (id=45.43%; len=339; e=6.22E-92)	LTIPDVSPTKSIT; LTIPDVSPTKSIT	2,3,4	2.546	0.6057	0.020896	1	9	12	12	8	S22; S22	0.0366633	0.583665	0.858962	0.787125	0.709539	1	0.992333	8.79595e-05	FC	0.0334274	0.074258	0.963804	0.0255228	0.000752927
PMI_005805; 45932|m.30794; 45931|m.30793; Pmi_669310_CCNT2_HUMAN_Cyclin-T2|m.31440	S1216; S1365; S1374; S1398	XP_022085643.1 protein piccolo-like isoform X3 [Acanthaster planci] (id=69.31%; len=1111; e=0.00E+00) ; XP_022085635.1 protein piccolo-like isoform X2 [Acanthaster planci] (id=72.41%; len=1276; e=0.00E+00) ; XP_022085626.1 protein piccolo-like isoform X1 [Acanthaster planci] (id=72.53%; len=1285; e=0.00E+00) ; CCNT2_HUMAN_Cyclin-T2	ASPAMSSPAKKRT; ASPAMSSPAKKRT; ASPAMSSPAKKRT; ASPAMSSPAKKRT	2,3	2.532	0.5276	0.166867	1	1	1	2		S1216; S1365; S1374; S1398	0.0498309	0.0584691	0.0624812	0.292204	0.35348	1	0.997015	1.33485e-05	FC
Pmi_579320_FKBP3_RABIT_Peptidyl-prolyl_cis-trans_isomerase_FKBP3|m.12476	T158	FKBP3_RABIT_Peptidyl-prolyl_cis-trans_isomerase_FKBP3	KKKKDNTPLKFKV	3,4	1.725	0.417	0.049161	1	2	1	1	1	T158	0.0470515	0.393353	0.747745	0.849388	0.614058	0.886382	0.825691	0.0429275	FC	0.0376004	0.0855249	0.948699	0.0218138	0.00156123
Pmi_594840_TADH_ARAIR_Tauropine_dehydrogenase|m.14470; PMI_023438; 24636|m.18686	S321; S386; S321	TADH_ARAIR_Tauropine_dehydrogenase; BAF36491.1 strombine/alanopine dehydrogenase [Marphysa sanguinea] (id=53.47%; len=303; e=1.69E-115) ; BAF36491.1 strombine/alanopine dehydrogenase [Marphysa sanguinea] (id=53.92%; len=395; e=3.66E-159)	NEGGGVSPNFKFR; NEGGGVSPNFKFR; NEGGGVSPNFKFR	3,4	5.023	0.6659	0.180932	1	3	2	2	1	S321; S386; S321	0.0470714	0.245763	0.784818	0.79536	0.811424	1	0.992495	8.42664e-05	FC	0.0369256	0.0894117	0.991768	0.0254501	1.30878e-05
PMI_014293	S809	XP_022079909.1 kinesin heavy chain-like isoform X2 [Acanthaster planci] (id=84.25%; len=959; e=0.00E+00)	RSSPQQSPDSNVN	3,4	6.947	0.7758	0.026175	1	5	4	2	5	S809	0.0871099	0.490133	0.544924	0.589029	0.587749	1	0.977277	0.000768629	FC	0.181344	0.371177	0.973346	0.000731804	5.26041e-06
Pmi_336950_no_annot|m.1686	S91	no_annot	AMRPGASPPSREV	3	1.868	0.6852	0.147985	0.99999	1	2	1		S91	0.0394751	0.339651	0.749829	0.808284	0.730326	0.913274	0.958592	0.00253641	FC
Pmi_577513_SALL3_MOUSE_Sal-like_protein_3|m.12262; Pmi_530930_MTF1_MOUSE_Metal_regulatory_transcription_factor_1|m.8071; Pmi_528151_ZNF85_HUMAN_Zinc_finger_protein_85|m.7853; PMI_029267; PMI_013749	T87; T280; T36; T354; T58	SALL3_MOUSE_Sal-like_protein_3; MTF1_MOUSE_Metal_regulatory_transcription_factor_1; ZNF85_HUMAN_Zinc_finger_protein_85; BAE94132.1 zinc finger protein Ap-Zic [Patiria pectinifera] (id=94.45%; len=541; e=0.00E+00) ; XP_022089947.1 metal regulatory transcription factor 1-like [Acanthaster planci] (id=55.84%; len=625; e=0.00E+00)	IHIRTHTGEKPFK; KHIRTHTGEKPFK; IHVRTHTGEKPFK; IHKRTHTGEKPFK; KHIRTHTGEKPFK	3,4	1.697	0.5415	0.042152	1	1	2	1		T87; T280; T36; T354; T58	0.0592983	0.618518	0.769884	0.728408	0.87613	0.957736	0.923073	0.00864897	FC
PMI_008379; PMI_005537; Pmi_641250_GPAT4_MOUSE_Glycerol-3-phosphate_acyltransferase_4|m.23004; 29119|m.21191	T56; T56; T92; T92	XP_022080703.1 glycerol-3-phosphate acyltransferase 4-like [Acanthaster planci] (id=80.51%; len=472; e=0.00E+00) ; XP_022080703.1 glycerol-3-phosphate acyltransferase 4-like [Acanthaster planci] (id=79.03%; len=472; e=0.00E+00) ; GPAT4_MOUSE_Glycerol-3-phosphate_acyltransferase_4; XP_022080703.1 glycerol-3-phosphate acyltransferase 4-like [Acanthaster planci] (id=84.32%; len=472; e=0.00E+00)	GNKISQTPTAKET; GNKISQTPTAKET; GNKISQTPTAKET; GNKISQTPTAKET	2	2.275	0.4273	0.276333	1	1	2	1		T56; T56; T92; T92	0.0400038	0.134554	0.675145	0.766003	0.758828	1	0.995276	3.34149e-05	FC
Pmi_653111_TACC3_XENLA_Transforming_acidic_coiled-coil-containing_pr..CUT|m.26159; 60941|m.40375	S240; S240	TACC3_XENLA_Transforming_acidic_coiled-coil-containing_pr..CUT; XP_022091717.1 transforming acidic coiled-coil-containing protein 3-like isoform X7 [Acanthaster planci] (id=74.87%; len=951; e=0.00E+00)	LPASKKSPAPEFN; LPASKKSPAPEFN	2,3,4,5	6.593	0.7353	0.022591	1	11	13	12	1	S240; S240	0.0469253	0.353391	0.611374	0.735323	0.683484	1	0.976025	0.000855323	FC	0.145358	0.23965	0.916587	0.0621136	0.00424873
Pmi_633641_MPRIP_MOUSE_Myosin_phosphatase_Rho-interacting_protein|m.21267	S410:S415	MPRIP_MOUSE_Myosin_phosphatase_Rho-interacting_protein	PLPELPSPQEKSP,PSPQEKSPREVLP	3,4	2.939	0.6623	0.967925	1	1	2	2		S410:S415	0.0359903	0.129275	0.392179	0.451767	0.610603	1	0.994791	4.0623e-05	FC
27703|m.20454; 27709|m.20457	S72; S72	XP_022108953.1 uncharacterized protein LOC110989113 [Acanthaster planci] (id=70.54%; len=129; e=8.92E-43) ; XP_022108953.1 uncharacterized protein LOC110989113 [Acanthaster planci] (id=70.54%; len=129; e=9.85E-43)	KERSAFSPSKRKE; KERSAFSPSKRKE	2	1.695	0.4718	0.296926	1	7	6	7		S72; S72	0.054117	0.697167	0.957466	0.897125	0.780665	0.999093	0.989193	0.000174562	FC
Pmi_622621_BRAP_HUMAN_BRCA1-associated_protein|m.18972	S259	BRAP_HUMAN_BRCA1-associated_protein	KSDQPLSDPTSAT	2,3	1.924	0.5971	0.784844	1	1	2	2		S259	0.0572838	0.402802	0.844169	0.828772	0.768215	1	0.979706	0.000613596	FC
Pmi_402530_no_annot|m.2888; PMI_008117	S81; S680	no_annot; XP_022101207.1 nischarin-like isoform X3 [Acanthaster planci] (id=77.62%; len=983; e=0.00E+00)	IQQPPASPTLKIS; IQQPPASPTLKIS	2,3,4	4.356	0.6838	0.008875	1	8	6	8	2	S81; S680	0.0349243	0.198102	0.493137	0.615336	0.475874	1	0.995006	3.7349e-05	FC	0.286746	0.522722	0.920988	0.00285543	0.00539868
PMI_002531	S497	XP_022090239.1 vacuolar protein sorting-associated protein 13D-like isoform X2 [Acanthaster planci] (id=88.36%; len=3584; e=0.00E+00)	TAIEQSSVGEDTD	3	5.488	0.615	0.15121	0.99845	1	1	1		S497	0.0731924	0.284208	0.594619	0.654803	0.762684	1	0.981044	0.000535564	FC
16333|m.11065; Pmi_653840_APBA1_HUMAN_Amyloid_beta_A4_precursor_protein-binding_fam..CUT|m.26347	S236; S963	XP_022086965.1 uncharacterized protein LOC110977288 isoform X3 [Acanthaster planci] (id=93.24%; len=695; e=0.00E+00) ; APBA1_HUMAN_Amyloid_beta_A4_precursor_protein-binding_fam..CUT	PNMPNVSPMEYDV; PNMPNVSPMEYDV	3,4	3.675	0.7321	0.035592	1	9	9	9	8	S236; S963	0.0478434	0.216604	0.647639	0.67196	0.812578	1	0.959482	0.00242932	FC	0.056529	0.113147	0.980571	0.0534224	0.000179578
PMI_000876; PMI_000024	S1655; S1633	XP_011665894.1 PREDICTED: hydrocephalus-inducing protein homolog [Strongylocentrotus purpuratus] (id=66.72%; len=5219; e=0.00E+00) ; XP_022110484.1 hydrocephalus-inducing protein homolog, partial [Acanthaster planci] (id=87.31%; len=3019; e=0.00E+00)	AGSPMPSPTPRDP; AGSPMPSPTPRDP	2,3,4	3.153	0.7057	0.00436	0.99999	3	5	3	6	S1655; S1633	0.0465666	0.368497	0.631563	0.745709	0.821436	1	0.977914	0.000726332	FC	0.184209	0.28483	0.970752	0.0321941	8.33663e-06
Pmi_527470_MLTK_HUMAN_Mitogen-activated_protein_kinase_kinase_kinase_MLT|m.7806	S279:T282	MLTK_HUMAN_Mitogen-activated_protein_kinase_kinase_kinase_MLT	PVRKNPSTGTPPT,KNPSTGTPPTLPL	3	1.723	0.5734	0.106919	0.99497	1	1	1		S279:T282	0.0233339	0.147921	0.717698	0.810044	0.841853	1	0.996007	2.38818e-05	FC
Pmi_559390_K0528_MOUSE_Uncharacterized_protein_KIAA0528|m.10381	S99	K0528_MOUSE_Uncharacterized_protein_KIAA0528	RTNPLTSPLSTSP	3,4	4.378	0.7039	0.133396	0.99999	4	4	4	3	S99	0.0428547	0.285162	0.853943	0.855644	0.763111	1	0.981741	0.000497042	FC	0.0981378	0.26981	0.97431	0.000421449	2.89407e-05
Pmi_618741_NOLC1_RAT_Nucleolar_and_coiled-body_phosphoprotein_1|m.18249; 62218|m.41119	T273; T16	NOLC1_RAT_Nucleolar_and_coiled-body_phosphoprotein_1; XP_022080048.1 nucleolar and coiled-body phosphoprotein 1-like [Acanthaster planci] (id=68.09%; len=210; e=2.42E-18)	PKGKKVTPTPAQK; PKGKKVTPTPAQK	2,3,4	1.824	0.3583	0.579507	1	2	3	4		T273; T16	0.0405837	0.486921	0.785362	0.790372	0.733542	1	0.97514	0.000919315	FC
PMI_023823; Pmi_611740_PPR37_DANRE_Protein_phosphatase_1_regulatory_subunit_37|m.17012	S389; S503	XP_022095643.1 protein phosphatase 1 regulatory subunit 37-like [Acanthaster planci] (id=68.64%; len=692; e=0.00E+00) ; PPR37_DANRE_Protein_phosphatase_1_regulatory_subunit_37	SEMGPQSPTTRVN; SEMGPQSPTTRVN	2,3,4	3.884	0.7405	0.010349	1	9	9	9	5	S389; S503	0.0508756	0.784539	0.945986	0.956728	0.884806	0.964514	0.976011	0.00085629	FC	0.159308	0.316386	0.922441	0.065807	0.0027221
33991|m.24074; Pmi_618771_no_annot|m.18247	S131:S134; S138:S141	XP_022085876.1 leucine-rich repeat-containing protein 43-like isoform X2 [Acanthaster planci] (id=82.26%; len=186; e=6.96E-56) ; no_annot	KAKRPESQASDDE,RPESQASDDEERQ; KAKRPESQASDDE,RPESQASDDEERQ	3	2.495	0.3872	0.112424	1	2	1	1	1	S131:S134; S138:S141	0.0597069	0.168857	0.7757	0.745396	0.833522	1	0.986133	0.000287104	FC	0.192194	0.273876	0.983253	0.128633	3.19811e-06
77088|m.51594; PMI_019948; Pmi_664700_MCM2_XENLA_DNA_replication_licensing_factor_mcm2|m.29741; PMI_013218	S405; S365; S365; S365	BAH83664.1 minichromosome maintenance 2 [Patiria pectinifera] (id=99.43%; len=883; e=0.00E+00) ; BAH83664.1 minichromosome maintenance 2 [Patiria pectinifera] (id=99.43%; len=883; e=0.00E+00) ; MCM2_XENLA_DNA_replication_licensing_factor_mcm2; BAH83664.1 minichromosome maintenance 2 [Patiria pectinifera] (id=99.68%; len=630; e=0.00E+00)	RITIQESPGKVAA; RITIQESPGKVAA; RITIQESPGKVAA; RITIQESPGKVAA	3	2.185	0.5561	0.019022	0.99999	2	1	1	1	S405; S365; S365; S365	0.0933606	0.564264	0.821475	0.802745	0.741095	1	0.974324	0.000980416	FC	0.193906	0.260436	0.983104	0.0733317	0.000147979
Pmi_654032_ELYS_HUMAN_Protein_ELYS|m.26390; 17629|m.12219	S625; S180	ELYS_HUMAN_Protein_ELYS; XP_022090036.1 protein ELYS-like [Acanthaster planci] (id=80.61%; len=361; e=0.00E+00)	VVGREVSPWKRQP; VVGREVSPWKRQP	2	1.639	0.2997	0.061551	1	3	1	2	1	S625; S180	0.042095	0.838042	0.970266	0.806309	0.734678	0.983146	0.989314	0.000170662	FC	0.0916989	0.146267	0.982206	0.0218141	1.15067e-06
Pmi_670720_PRKDC_XENLA_DNA-dependent_protein_kinase_catalytic_subunit|m.31984; 72438|m.48445; 72439|m.48446; 72442|m.48450	S1214; S96; S96; S118	PRKDC_XENLA_DNA-dependent_protein_kinase_catalytic_subunit; XP_022110985.1 DNA-dependent protein kinase catalytic subunit-like isoform X2 [Acanthaster planci] (id=82.72%; len=654; e=0.00E+00) ; XP_011662606.1 PREDICTED: DNA-dependent protein kinase catalytic subunit [Strongylocentrotus purpuratus] (id=52.63%; len=1349; e=0.00E+00) ; XP_022110986.1 DNA-dependent protein kinase catalytic subunit-li…	KRAKHVSKEQSPE; KRAKHVSKEQSPE; KRAKHVSKEQSPE; KRAKHVSKEQSPE	3,4	5.343	0.6429	0.022044	1	2	2	2		S1214; S96; S96; S118	0.0390636	0.061975	0.222988	0.352084	0.625529	1	0.99694	1.40345e-05	FC
Pmi_656790_ACRC_HUMAN_Acidic_repeat-containing_protein|m.27247; 68857|m.45963; 68859|m.45969; 68852|m.45946	S303; S44; S290; S303	ACRC_HUMAN_Acidic_repeat-containing_protein; XP_022098977.1 acidic repeat-containing protein-like isoform X1 [Acanthaster planci] (id=68.46%; len=539; e=0.00E+00) ; XP_022098977.1 acidic repeat-containing protein-like isoform X1 [Acanthaster planci] (id=61.20%; len=817; e=0.00E+00) ; XP_022098977.1 acidic repeat-containing protein-like isoform X1 [Acanthaster planci] (id=61.69%; len=830; e=0.00E+…	DLETQFSPGHVCR; DLETQFSPGHVCR; DLETQFSPGHVCR; DLETQFSPGHVCR	2,3	2.72	0.689	0.441882	1	1	2	2		S303; S44; S290; S303	0.0618587	0.843543	0.36704	0.313279	0.680157	0.936536	0.809617	0.0509184	FC
Pmi_612410_LRC63_MOUSE_Leucine-rich_repeat-containing_protein_63|m.17111; PMI_000210	S130; S105	LRC63_MOUSE_Leucine-rich_repeat-containing_protein_63; XP_022102059.1 leucine-rich repeat-containing protein 63-like isoform X2 [Acanthaster planci] (id=61.85%; len=713; e=0.00E+00)	KIPLKPSPQTRRS; KIPLKPSPQTRRS	3	1.399	0.4266	0.425906	1	1	1	1	1	S130; S105	0.067641	0.623063	0.827284	0.462768	0.642896	1	0.982709	0.000445885	FC	0.644171	0.60687	0.930707	0.364105	0.0115689
Pmi_669661_APC1_HUMAN_Anaphase-promoting_complex_subunit_1|m.31545; PMI_026588; PMI_012312; 20320|m.14879	S249; S211; S130; S249	APC1_HUMAN_Anaphase-promoting_complex_subunit_1; XP_022110916.1 anaphase-promoting complex subunit 1-like isoform X2 [Acanthaster planci] (id=77.04%; len=270; e=9.19E-138) ; XP_022110914.1 anaphase-promoting complex subunit 1-like isoform X1 [Acanthaster planci] (id=78.73%; len=851; e=0.00E+00) ; XP_022110914.1 anaphase-promoting complex subunit 1-like isoform X1 [Acanthaster planci] (id=83.69%; …	SNQEITSPKRESE; SNQEITSPKRESE; SNQEITSPKRESE; SNQEITSPKRESE	2,3	3.509	0.676	0.001794	1	4	5	4	1	S249; S211; S130; S249	0.0422138	0.283813	0.869449	0.817451	0.731616	1	0.994285	4.88928e-05	FC	0.0709754	0.11429	0.920523	0.0125116	0.00187212
PMI_018464; 43732|m.29445; PMI_026559; Pmi_643770_IF5_MOUSE_Eukaryotic_translation_initiation_factor_5|m.23660	S424; S403; S276; S403	XP_022094015.1 eukaryotic translation initiation factor 5-like [Acanthaster planci] (id=80.77%; len=442; e=0.00E+00) ; XP_022094015.1 eukaryotic translation initiation factor 5-like [Acanthaster planci] (id=85.04%; len=421; e=0.00E+00) ; XP_016101949.1 PREDICTED: eukaryotic translation initiation factor 5-like [Sinocyclocheilus grahami] (id=50.98%; len=306; e=8.77E-94) ; IF5_MOUSE_Eukaryotic_tran…	PKAVTISPPAKTS; PKAVTISPPAKTS; PKAVTISPPAKTS; PKAVTISPPAKTS	2,3	2.814	0.6426	0.027643	1	11	9	14	17	S424; S403; S276; S403	0.0509477	0.648067	0.875759	0.859502	0.756	1	0.997668	8.14874e-06	FC	0.0443785	0.0973395	0.969419	0.0225875	0.000949995
PMI_009280	S104	XP_022089678.1 armadillo repeat-containing protein 1-like [Acanthaster planci] (id=72.86%; len=280; e=2.27E-141)	TLTTLPSPSPLKE	2,3	3.102	0.6055	0.016339	0.99999	2	1	2		S104	0.0521254	0.430781	0.605503	0.628755	0.767961	1	0.965694	0.0017452	FC
Pmi_606191_STXB5_HUMAN_Syntaxin-binding_protein_5|m.16091	S380	STXB5_HUMAN_Syntaxin-binding_protein_5	LQRSRMSPSSSTE	2,3	2.734	0.6087	0.065782	1	6	7	4	4	S380	0.0705695	0.51936	0.876297	0.884004	0.802408	0.982942	0.97332	0.00105823	FC	0.145186	0.189668	0.940729	0.0686414	0.00158935
76959|m.51477; Pmi_671200_SLX4_MOUSE_Structure-specific_endonuclease_subunit_SLX4|m.32203; 76955|m.51467; 76961|m.51484; 76956|m.51470; 76957|m.51474; 76960|m.51480	S724; S1279; S801; S1270; S1277; S914; S1056	XP_022079475.1 uncharacterized protein LOC110973174 isoform X1 [Acanthaster planci] (id=50.76%; len=857; e=0.00E+00) ; SLX4_MOUSE_Structure-specific_endonuclease_subunit_SLX4; XP_022079476.1 uncharacterized protein LOC110973174 isoform X2 [Acanthaster planci] (id=50.27%; len=931; e=0.00E+00) ; XP_022079475.1 uncharacterized protein LOC110973174 isoform X1 [Acanthaster planci] (id=55.23%; len=1405…	RKLYPTSPVKTYR; RKLYPTSPVKTYR; RKLYPTSPVKTYR; RKLYPTSPVKTYR; RKLYPTSPVKTYR; RKLYPTSPVKTYR; RKLYPTSPVKTYR	3	2.106	0.51	0.713519	0.99855	2	2	1		S724; S1279; S801; S1270; S1277; S914; S1056	0.0329474	0.0687888	0.182344	0.320093	0.539783	1	0.995939	2.47028e-05	FC
Pmi_619790_AUP1_DANRE_Ancient_ubiquitous_protein_1|m.18437; 67830|m.45253; PMI_018599	T310; T26; T328	AUP1_DANRE_Ancient_ubiquitous_protein_1; XP_022086637.1 ancient ubiquitous protein 1-like isoform X2 [Acanthaster planci] (id=75.32%; len=158; e=8.76E-68) ; XP_022086636.1 ancient ubiquitous protein 1-like isoform X1 [Acanthaster planci] (id=83.30%; len=443; e=0.00E+00)	TPTEPTTPGDAAV; TPTEPTTPGDAAV; TPTEPTTPGDAAV	3	3.936	0.7435	0.034215	0.99743	3	3	3	3	T310; T26; T328	0.0453274	0.893314	0.585001	0.621204	0.610964	1	0.977565	0.000749376	FC	0.0937726	0.150127	0.965754	0.01186	0.00017889
PMI_019546	S123	XP_022108953.1 uncharacterized protein LOC110989113 [Acanthaster planci] (id=55.38%; len=260; e=1.13E-71)	PIVAISSPGPAIE	3,4	6.828	0.7934	0.027848	1	26	24	22	71	S123	0.0520692	0.651008	0.890853	0.892441	0.773475	1	0.99141	0.000110364	FC	0.0290851	0.0854523	0.955462	0.0134347	0.000747573
PMI_025043	S311	XP_022098719.1 uncharacterized protein C5orf34 homolog isoform X2 [Acanthaster planci] (id=56.16%; len=755; e=0.00E+00)	EHTCTLSPKNEIN	2,3	2.621	0.4916	0.092265	1	2	3	3		S311	0.0492685	0.463144	0.928011	0.830875	0.77133	0.997463	0.998233	4.67939e-06	FC
Pmi_651770_TDRD1_HUMAN_Tudor_domain-containing_protein_1|m.25775; 16967|m.11638; PMI_019747	S1051:S1066; S346:S361; S1576:S1591	TDRD1_HUMAN_Tudor_domain-containing_protein_1; XP_022086654.1 uncharacterized protein LOC110977121 isoform X1 [Acanthaster planci] (id=68.61%; len=411; e=3.36E-178) ; XP_022086654.1 uncharacterized protein LOC110977121 isoform X1 [Acanthaster planci] (id=62.96%; len=1385; e=0.00E+00)	PGPTTKSPQPVSA,PAGPVVSPKAATS; PGPTTKSPQPVSA,PAGPVVSPKAATS; PGPTTKSPQPVSA,PAGPVVSPKAATS	3	5.007	0.735	0.090518	1	1	2	1		S1051:S1066; S346:S361; S1576:S1591	0.0540686	0.781714	0.880031	0.9059	0.674037	1	0.939538	0.00537296	FC
55275|m.36691; Pmi_649900_RGAP1_HUMAN_Rac_GTPase-activating_protein_1|m.25246; PMI_004322	T251; T465; T647	XP_022086734.1 rac GTPase-activating protein 1-like isoform X2 [Acanthaster planci] (id=89.83%; len=295; e=0.00E+00) ; RGAP1_HUMAN_Rac_GTPase-activating_protein_1; XP_022086734.1 rac GTPase-activating protein 1-like isoform X2 [Acanthaster planci] (id=85.90%; len=695; e=0.00E+00)	GKMGKKTPSSSSI; GKMGKKTPSSSSI; GKMGKKTPSSSSI	2,3	1.529	0.4611	0.200021	1	1	2	1		T251; T465; T647	0.0306122	0.498747	0.445255	0.401006	0.594854	1	0.879927	0.0207606	FC
PMI_013934	S309	XP_022079908.1 kinesin heavy chain-like isoform X1 [Acanthaster planci] (id=87.37%; len=467; e=0.00E+00)	RSSPQQSPDSNVN	3,4,5	6.191	0.7361	0.625658	0.99999	3	2	3		S309	0.0584954	0.468427	0.532233	0.588698	0.562145	1	0.990054	0.000147886	FC
70678|m.47179; Pmi_660150_KIF11_XENTR_Kinesin-like_protein_KIF11|m.28276	T95; T945	XP_022091821.1 kinesin-like protein KIF11-A [Acanthaster planci] (id=75.34%; len=223; e=4.59E-111) ; KIF11_XENTR_Kinesin-like_protein_KIF11	DVPTGVTPKNRRF; DVPTGVTPKNRRF	2,3,4	3.347	0.6153	0.012832	1	8	5	11	4	T95; T945	0.0460841	0.757145	0.896946	0.872563	0.745634	1	0.984726	0.000348145	FC	0.0441847	0.108069	0.910908	0.0752051	0.00300413
80698|m.54249; Pmi_668021_BAZ1B_HUMAN_Tyrosine-protein_kinase_BAZ1B|m.30901; PMI_006840; PMI_009697; 80695|m.54241; 80694|m.54238; 80699|m.54252; 80697|m.54247	S589:T593; S592:T596; S56:T60; S56:T60; S575:T579; S578:T582; S198:T202; S195:T199	XP_022094996.1 tyrosine-protein kinase BAZ1B-like isoform X2 [Acanthaster planci] (id=79.71%; len=1104; e=0.00E+00) ; BAZ1B_HUMAN_Tyrosine-protein_kinase_BAZ1B; XP_022094998.1 tyrosine-protein kinase BAZ1B-like isoform X4 [Acanthaster planci] (id=80.55%; len=1136; e=0.00E+00) ; XP_022095000.1 tyrosine-protein kinase BAZ1B-like isoform X5 [Acanthaster planci] (id=78.22%; len=101; e=7.34E-39) ; XP_…	QKKGKVSPVKTPK,KVSPVKTPKSKKS; QKKGKVSPVKTPK,KVSPVKTPKSKKS; QKKGKVSPVKTPK,KVSPVKTPKSKKS; QKKGKVSPVKTPK,KVSPVKTPKSKKS; QKKGKVSPVKTPK,KVSPVKTPKSKKS; QKKGKVSPVKTPK,KVSPVKTPKSKKS; QKKGKVSPVKTPK,KVSPVKTPKSKKS; QKKGKVSPVKTPK,KVSPVKTPKSKKS	2,4	1.025	0.5288	0.4608	1	1	1	1		S589:T593; S592:T596; S56:T60; S56:T60; S575:T579; S578:T582; S198:T202; S195:T199	0.0438612	0.722604	0.934911	0.488647	0.652599	0.967761	0.976808	0.000800543	FC
59256|m.39194; 59261|m.39207; PMI_003162; 59260|m.39203	S142; S168; S183; S142	XP_022087871.1 protein HGV2-like isoform X2 [Acanthaster planci] (id=71.29%; len=526; e=0.00E+00) ; XP_022087871.1 protein HGV2-like isoform X2 [Acanthaster planci] (id=70.70%; len=512; e=0.00E+00) ; XP_022087870.1 protein HGV2-like isoform X1 [Acanthaster planci] (id=77.06%; len=170; e=8.63E-71) ; XP_022087871.1 protein HGV2-like isoform X2 [Acanthaster planci] (id=70.91%; len=526; e=0.00E+00)	TDKENASEKDDAK; TDKENASEKDDAK; TDKENASEKDDAK; TDKENASEKDDAK	3,4	2.005	0.5202	0.635435	1	1	1	2		S142; S168; S183; S142	0.0381571	0.101234	0.246174	0.351262	0.37064	1	0.98306	0.000427993	FC
Pmi_663860_DPOLA_XENLA_DNA_polymerase_alpha_catalytic_subunit|m.29493; PMI_020183	S215; S92	DPOLA_XENLA_DNA_polymerase_alpha_catalytic_subunit; XP_022101936.1 DNA polymerase alpha catalytic subunit-like [Acanthaster planci] (id=59.42%; len=345; e=2.31E-105)	KRKVRTSGSGPSP; KRKVRTSGSGPSP	3,4	2.515	0.5699	0.016135	0.99645	4	1	1	4	S215; S92	0.0427334	0.077573	0.151364	0.665554	0.450274	1	0.969393	0.0013908	FC	0.0939641	0.27319	0.964899	0.00510401	7.50443e-05
30395|m.21946; 30398|m.21956; PMI_017745; Pmi_659781_CND3_XENLA_Condensin_complex_subunit_3|m.28172; 30393|m.21936	S490; S490; S564; S664; S490	XP_022086527.1 condensin complex subunit 3-like isoform X1 [Acanthaster planci] (id=79.76%; len=924; e=0.00E+00) ; XP_022086527.1 condensin complex subunit 3-like isoform X1 [Acanthaster planci] (id=84.10%; len=786; e=0.00E+00) ; XP_022086527.1 condensin complex subunit 3-like isoform X1 [Acanthaster planci] (id=81.13%; len=657; e=0.00E+00) ; CND3_XENLA_Condensin_complex_subunit_3; XP_022086527.1…	IATSAPSVGDGDS; IATSAPSVGDGDS; IATSAPSVGDGDS; IATSAPSVGDGDS; IATSAPSVGDGDS	2,3	2.391	0.6489	0.031296	1	2	3	3		S490; S490; S564; S664; S490	0.0426012	0.284469	0.767604	0.798031	0.773275	1	0.991686	0.000103397	FC
Pmi_644200_KAZRN_HUMAN_Kazrin|m.23808; PMI_027720; PMI_005439	S49; S13; S132	KAZRN_HUMAN_Kazrin; XP_022085514.1 kazrin-like [Acanthaster planci] (id=81.13%; len=355; e=0.00E+00) ; XP_022085514.1 kazrin-like [Acanthaster planci] (id=87.05%; len=803; e=0.00E+00)	SECDVSSPVSESV; SECDVSSPVSESV; SECDVSSPVSESV	2,3	4.232	0.8235	0.180694	0.99766	2	2	3	2	S49; S13; S132	0.0567286	0.367671	0.920442	0.882186	0.862543	0.988182	0.983312	0.000415419	FC	0.0766756	0.138928	0.915481	0.00453947	0.00292116
Pmi_667390_no_annot|m.30670	S512	no_annot	KSKVAPSPEPKAD	2	1.835	0.5469	0.044484	1	5	5	5	2	S512	0.0429544	0.642886	0.93836	0.859542	0.748768	1	0.999376	5.84086e-07	FC	0.050254	0.0941724	0.939615	0.0160445	0.00112212
26442|m.19750; PMI_000286; Pmi_651631_BMI1_MOUSE_Polycomb_complex_protein_BMI-1|m.25732	T673; T692; T699	XP_022087782.1 polycomb group protein Psc-like isoform X2 [Acanthaster planci] (id=62.08%; len=712; e=0.00E+00) ; XP_022087782.1 polycomb group protein Psc-like isoform X2 [Acanthaster planci] (id=62.38%; len=731; e=0.00E+00) ; BMI1_MOUSE_Polycomb_complex_protein_BMI-1	TPTEKTTPTEKTP; TPTEKTTPTEKTP; TPTEKTTPTEKTP	3,4	3.836	0.5894	0.205765	0.9915	1	1	1		T673; T692; T699	0.0640809	0.161371	0.603793	0.676297	0.730387	1	0.993856	5.65105e-05	FC
Pmi_616530_RHG32_XENLA_Rho_GTPase-activating_protein_32|m.17840; PMI_017529	T1070:S1076; T804:S810	RHG32_XENLA_Rho_GTPase-activating_protein_32; XP_022108343.1 rho GTPase-activating protein 32-like isoform X8 [Acanthaster planci] (id=73.15%; len=1121; e=0.00E+00)	YSNRALTPDFDTS,TPDFDTSAEEGAS; YSNRALTPDFDTS,TPDFDTSAEEGAS	3	2.798	0.6244	1.34597	0.99999	2	1	2		T1070:S1076; T804:S810	0.0500076	0.300279	0.537023	0.597238	0.897971	1	0.976655	0.000811103	FC
PMI_025665	S64	XP_022098620.1 cytoplasmic protein NCK2-like isoform X2 [Acanthaster planci] (id=81.51%; len=411; e=0.00E+00)	WKVRKASGEAGYV	3,4	4.088	0.6893	0.266934	1	2	2	2	1	S64	0.0482293	0.108351	0.685063	0.706584	0.929991	1	0.937169	0.00579766	FC	0.0554009	0.184415	0.934481	0.0105487	0.00326287
Pmi_662471_RUN3B_DANRE_RUN_domain-containing_protein_3B|m.29100	S497	RUN3B_DANRE_RUN_domain-containing_protein_3B	YRVRPMSPGSVSS	3	3.688	0.7656	0.088478	0.99555	3	4	5		S497	0.0493525	0.91274	0.937092	0.767072	0.733809	0.98779	0.91732	0.00997128	FC
PMI_009884; 70572|m.47089; 70565|m.47075	S371:S372; S193:S194; S193:S194	XP_022097990.1 trithorax group protein osa-like isoform X2 [Acanthaster planci] (id=59.77%; len=1469; e=0.00E+00) ; XP_022097998.1 trithorax group protein osa-like isoform X3 [Acanthaster planci] (id=78.64%; len=1044; e=0.00E+00) ; XP_022097990.1 trithorax group protein osa-like isoform X2 [Acanthaster planci] (id=78.64%; len=1044; e=0.00E+00)	RSNSRKSSLHEDE,SNSRKSSLHEDEL; RSNSRKSSLHEDE,SNSRKSSLHEDEL; RSNSRKSSLHEDE,SNSRKSSLHEDEL	3,4	4.367	0.6897	0.109	1	5	2	4		S371:S372; S193:S194; S193:S194	0.0479916	0.437033	0.309846	0.412747	0.32328	1	0.980121	0.000588816	FC
PMI_023942; Pmi_616402_SUPT3_HUMAN_Transcription_initiation_protein_SPT3_homolog|m.17823; PMI_002563	S90; S415; S133	XP_022089987.1 transcription initiation protein SPT3 homolog isoform X3 [Acanthaster planci] (id=82.86%; len=140; e=3.36E-58) ; SUPT3_HUMAN_Transcription_initiation_protein_SPT3_homolog; XP_022089987.1 transcription initiation protein SPT3 homolog isoform X3 [Acanthaster planci] (id=81.52%; len=184; e=1.41E-88)	KRKKKPSGSSLLA; KRKKKPSGSSLLA; KRKKKPSGSSLLA	3,4	3.648	0.7039	0.106156	1	3	2	3	1	S90; S415; S133	0.0618053	0.184877	0.37886	0.364345	0.591812	1	0.985227	0.00032573	FC	0.240097	0.336849	0.903083	0.0450462	0.00459254
Pmi_600280_no_annot|m.15196	S355:S364	no_annot	RLGKAASLDDKVE,DKVEENSPTKQPI	3,4,5	2.657	0.6315	0.402426	0.99625	2	2	1		S355:S364	0.0825984	0.138333	0.496755	0.903443	0.701201	0.961103	0.937934	0.00565878	FC
PMI_019931; PMI_025502	S21; S21	XP_022089049.1 adipocyte plasma membrane-associated protein-like [Acanthaster planci] (id=78.34%; len=397; e=0.00E+00) ; XP_022089049.1 adipocyte plasma membrane-associated protein-like [Acanthaster planci] (id=79.78%; len=361; e=0.00E+00)	VKSPSSSPGVEEV; VKSPSSSPGVEEV	2,3	4.095	0.6894	0.010537	1	3	2	4	5	S21; S21	0.0517983	0.378612	0.718058	0.74533	0.72665	1	0.989167	0.000175399	FC	0.0561033	0.0884968	0.990564	0.0248973	1.01536e-05
16799|m.11501; 16798|m.11500; PMI_021128	S36; S36; S35	XP_022107110.1 eukaryotic translation initiation factor 4E-like isoform X2 [Acanthaster planci] (id=86.57%; len=216; e=1.05E-133) ; XP_022107110.1 eukaryotic translation initiation factor 4E-like isoform X2 [Acanthaster planci] (id=87.00%; len=223; e=3.55E-140) ; XP_022107110.1 eukaryotic translation initiation factor 4E-like isoform X2 [Acanthaster planci] (id=87.00%; len=223; e=4.68E-140)	QSQAVLSPEEVIK; QSQAVLSPEEVIK; QSQAVLSPEEVIK	3,4,5	5.647	0.8252	0.010487	1	25	20	21	16	S36; S36; S35	0.0454422	0.514934	0.925963	0.861364	0.784878	0.993911	0.981963	0.000485082	FC	0.0266585	0.0698955	0.975058	0.0592401	0.000171718
PMI_009280; PMI_016558	S204; S243	XP_022089678.1 armadillo repeat-containing protein 1-like [Acanthaster planci] (id=72.86%; len=280; e=2.27E-141) ; XP_022089678.1 armadillo repeat-containing protein 1-like [Acanthaster planci] (id=84.64%; len=280; e=2.89E-178)	YLPEDDSPVKGLD; YLPEDDSPVKGLD	3,4,5	3.682	0.6543	0.104479	1	4	4	3	1	S204; S243	0.0694661	0.61705	0.901056	0.816766	0.780467	0.977764	0.938979	0.00547181	FC	0.101739	0.137888	0.968242	0.0589325	0.000257716
Pmi_638562_TMX3_PONAB_Protein_disulfide-isomerase_TMX3|m.22382; PMI_004291	S381; S367	TMX3_PONAB_Protein_disulfide-isomerase_TMX3; XP_022082279.1 protein disulfide-isomerase TMX3-like isoform X1 [Acanthaster planci] (id=74.04%; len=389; e=0.00E+00)	TELDDGSGHIKSE; TELDDGSGHIKSE	3	1.507	0.4526	0.425347	1	1	1	1		S381; S367	0.117531	0.373819	0.754675	0.887393	0.734338	1	0.954064	0.0031167	FC
19031|m.13549; PMI_004476; PMI_007109; Pmi_541050_ATX3_CHICK_Ataxin-3|m.8887	S55; S55; S374; S55	XP_022095675.1 ataxin-3-like [Acanthaster planci] (id=94.97%; len=199; e=3.64E-138) ; XP_022095675.1 ataxin-3-like [Acanthaster planci] (id=72.66%; len=406; e=0.00E+00) ; XP_022095675.1 ataxin-3-like [Acanthaster planci] (id=71.92%; len=406; e=0.00E+00) ; ATX3_CHICK_Ataxin-3	AEGDINSPEYLRF; AEGDINSPEYLRF; AEGDINSPEYLRF; AEGDINSPEYLRF	2,3	4.746	0.7059	0.144552	1	3	2	2		S55; S55; S374; S55	0.0431315	0.350844	0.841502	0.643852	0.828113	0.973484	0.920843	0.00915072	FC
10987|m.6781; PMI_008981; Pmi_654032_ELYS_HUMAN_Protein_ELYS|m.26390	S31; S1146; S894	XP_022090036.1 protein ELYS-like [Acanthaster planci] (id=68.42%; len=171; e=6.62E-53) ; XP_022090036.1 protein ELYS-like [Acanthaster planci] (id=71.54%; len=1641; e=0.00E+00) ; ELYS_HUMAN_Protein_ELYS	SPSVRTSPPTEKF; SPSVRTSPPTEKF; SPSVRTSPPTEKF	2	1.449	0.3354	0.373266	0.99999	2	2	2		S31; S1146; S894	0.0329454	0.826509	0.942962	0.875374	0.784606	0.991944	0.974524	0.000965302	FC
Pmi_653770_FA65A_RAT_Protein_FAM65A|m.26324	S288	FA65A_RAT_Protein_FAM65A	RSNRSRSDLKSPT	4	2.844	0.597	0.003754	0.99688	1	1	1		S288	0.0595251	0.730588	0.88277	0.798172	0.855394	0.992525	0.94566	0.00434908	FC
62753|m.41482; 62758|m.41492; Pmi_642890_SHCBB_XENLA_SHC_SH2_domain-binding_protein_1_homolog_B|m.23432; 62754|m.41486	S301; S276; S301; S29	XP_022084130.1 SHC SH2 domain-binding protein 1-like isoform X1 [Acanthaster planci] (id=62.15%; len=465; e=0.00E+00) ; XP_022084130.1 SHC SH2 domain-binding protein 1-like isoform X1 [Acanthaster planci] (id=62.15%; len=465; e=0.00E+00) ; SHCBB_XENLA_SHC_SH2_domain-binding_protein_1_homolog_B; XP_022084130.1 SHC SH2 domain-binding protein 1-like isoform X1 [Acanthaster planci] (id=54.55%; len=61…	VMEKNVSPGLALK; VMEKNVSPGLALK; VMEKNVSPGLALK; VMEKNVSPGLALK	2	2.201	0.4261	0.026016	1	2	3	4	2	S301; S276; S301; S29	0.055968	0.357031	0.909738	0.849659	0.731857	0.979998	0.964539	0.00186393	FC	0.0460895	0.0941151	0.964008	0.0115458	0.000669731
PMI_025751; 27196|m.20191; PMI_006171; Pmi_639890_SYAP1_HUMAN_Synapse-associated_protein_1|m.22672	T320; T349; T340; T347	XP_022100449.1 synapse-associated protein 1-like isoform X1 [Acanthaster planci] (id=75.98%; len=333; e=1.30E-167) ; XP_022100449.1 synapse-associated protein 1-like isoform X1 [Acanthaster planci] (id=82.26%; len=372; e=0.00E+00) ; XP_022100449.1 synapse-associated protein 1-like isoform X1 [Acanthaster planci] (id=80.38%; len=372; e=0.00E+00) ; SYAP1_HUMAN_Synapse-associated_protein_1	VVEEEDTGGNEEW; VVEEEDTGGNEEW; VVEEEDTGGNEEW; VVEEEDTGGNEEW	3	6.534	0.8238	0.964293	1	1	2	2		T320; T349; T340; T347	0.0845382	0.423867	0.921461	0.901619	0.687386	0.922518	0.908165	0.0122633	FC
PMI_002331; Pmi_647780_HERC2_HUMAN_E3_ubiquitin-protein_ligase_HERC2|m.24701	S2505; S1026	XP_022098915.1 E3 ubiquitin-protein ligase HERC2-like [Acanthaster planci] (id=90.32%; len=2583; e=0.00E+00) ; HERC2_HUMAN_E3_ubiquitin-protein_ligase_HERC2	REIVSPSDTAAAR; REIVSPSDTAAAR	2	2.174	0.6762	2.15798	0.99808	1	1	1		S2505; S1026	0.0503993	0.553731	0.947017	0.881534	0.816442	1	0.992793	7.77284e-05	FC
11776|m.7372	S34	XP_022082067.1 sperm-associated antigen 17-like isoform X3 [Acanthaster planci] (id=85.58%; len=104; e=8.90E-51)	EKDEGDSPTKGVG	3,4,5	3.187	0.6618	0.948815	1	1	2	2		S34	0.0750427	0.446869	0.818002	0.64837	0.759801	1	0.858194	0.0287375	FC
PMI_019497; Pmi_544150_VW5B1_HUMAN_von_Willebrand_factor_A_domain-containing_protein_5B1|m.9106	S483; S415	XP_022090006.1 von Willebrand factor A domain-containing protein 5B1-like [Acanthaster planci] (id=92.64%; len=625; e=0.00E+00) ; VW5B1_HUMAN_von_Willebrand_factor_A_domain-containing_protein_5B1	LIKIVESPVEGVK; LIKIVESPVEGVK	2,3	2.648	0.4532	0.00227	1	4	4	1	3	S483; S415	0.0985068	0.388428	0.956089	0.920771	0.814142	0.997349	0.995571	2.93786e-05	FC	0.0545953	0.105875	0.959841	0.000404245	0.000596724
Pmi_624671_SMRCD_HUMAN_SWI/SNF-related_matrix-associated_actin-depen..CUT|m.19461; 82958|m.55691	S122; S122	SMRCD_HUMAN_SWI/SNF-related_matrix-associated_actin-depen..CUT; XP_022082533.1 SWI/SNF-related matrix-associated actin-dependent regulator of chromatin subfamily A containing DEAD/H box 1-like isoform X1 [Acanthaster planci] (id=75.92%; len=1038; e=0.00E+00)	ITDTISSDSEDCG; ITDTISSDSEDCG	3	3.382	0.7114	0.124259	0.99735	2	2	1		S122; S122	0.0528294	0.0696747	0.0882013	0.383787	0.241635	1	0.997006	1.34299e-05	FC
Pmi_563070_CC067_MOUSE_Uncharacterized_protein_C3orf67_homolog|m.10703	S433	CC067_MOUSE_Uncharacterized_protein_C3orf67_homolog	HEAAILSPGKDMP	3,4,5	4.28	0.6857	0.015445	1	13	10	10	4	S433	0.061649	0.903157	0.92873	0.796923	0.873172	0.994583	0.986574	0.000269162	FC	0.103775	0.231382	0.951379	0.0149383	0.000742903
PMI_001336; Pmi_662410_TSC1_HUMAN_Hamartin|m.29071; 65395|m.43496	S274; S274; S274	XP_022085127.1 hamartin-like [Acanthaster planci] (id=80.90%; len=686; e=0.00E+00) ; TSC1_HUMAN_Hamartin; XP_022085127.1 hamartin-like [Acanthaster planci] (id=84.17%; len=360; e=0.00E+00)	ESARDDSCSYTPA; ESARDDSCSYTPA; ESARDDSCSYTPA	2,3,4	4.919	0.716	0.087416	0.99784	4	4	4		S274; S274; S274	0.0519085	0.418258	0.515309	0.77683	0.875123	1	0.849583	0.0322362	FC
48539|m.32438; Pmi_606840_UHRF1_RAT_E3_ubiquitin-protein_ligase_UHRF1|m.16217	S294; S289	XP_022109612.1 E3 ubiquitin-protein ligase UHRF1-like isoform X1 [Acanthaster planci] (id=87.64%; len=348; e=0.00E+00) ; UHRF1_RAT_E3_ubiquitin-protein_ligase_UHRF1	EVVEPNSPSKKSD; EVVEPNSPSKKSD	3,4	3.326	0.6458	0.121127	0.99998	2	2	2		S294; S289	0.0861736	0.155016	0.417684	0.453087	0.662408	1	0.976699	0.000808079	FC
Pmi_594940_no_annot|m.14489; PMI_018919	T66; T982	no_annot; XP_022085429.1 SRC kinase signaling inhibitor 1-like isoform X3 [Acanthaster planci] (id=76.01%; len=1088; e=0.00E+00)	KQGKKKTPPPPPP; KQGKKKTPPPPPP	3,4,5	2.608	0.4889	0.033418	1	4	3	3		T66; T982	0.0628036	0.461809	0.769954	0.699081	0.686041	1	0.952605	0.00331619	FC
83624|m.56120; PMI_000263; Pmi_670130_DNMT1_PARLI_DNA_(cytosine-5)-methyltransferase_PliMCI|m.31757; 83627|m.56129; PMI_006259; 83622|m.56115	S164; S331; S304; S101; S327; S165	AFR91943.1 DNA cytosine-5-methyltransferase 1 [Patiria pectinifera] (id=99.31%; len=1451; e=0.00E+00) ; AFR91943.1 DNA cytosine-5-methyltransferase 1 [Patiria pectinifera] (id=95.74%; len=1619; e=0.00E+00) ; DNMT1_PARLI_DNA_(cytosine-5)-methyltransferase_PliMCI; AFR91943.1 DNA cytosine-5-methyltransferase 1 [Patiria pectinifera] (id=99.42%; len=1383; e=0.00E+00) ; AFR91943.1 DNA cytosine-5-methyl…	PANIPKSPTKQAP; PANIPKSPTKQAP; PANIPKSPTKQAP; PANIPKSPTKQAP; PANIPKSPTK---; PANIPKSPTKQAP	2,3,4,5	3.047	0.6702	0.34593	1	2	2	3	3	S164; S331; S304; S101; S327; S165	0.056793	0.0973022	0.211211	0.257923	0.355108	1	0.996066	2.318e-05	FC	0.961759	0.853233	0.406105	0.281806	3.39237e-05
Pmi_617500_RABEK_BOVIN_Rab9_effector_protein_with_kelch_motifs|m.18004; 48604|m.32496	S364; S33	RABEK_BOVIN_Rab9_effector_protein_with_kelch_motifs; XP_022094352.1 rab9 effector protein with kelch motifs-like [Acanthaster planci] (id=62.16%; len=111; e=6.33E-35)	SQAQNASGDAEHL; SQAQNASGDAEHL	3,4	6.661	0.7837	0.353865	1	3	2	3		S364; S33	0.0659583	0.355296	0.740984	0.746048	0.755062	1	0.988355	0.000202623	FC
PMI_020601	S339:S347	XP_022092062.1 uncharacterized protein KIAA0355-like isoform X1 [Acanthaster planci] (id=73.40%; len=891; e=0.00E+00)	PQGSLRSPGDGSL,GDGSLGSPLGKGF	2,3	2.658	0.4899	0.244366	1	2	2	1		S339:S347	0.0523268	0.503065	0.91165	0.849038	0.751418	0.968233	0.970784	0.00126785	FC
PMI_004787; Pmi_631600_KIF4A_HUMAN_Chromosome-associated_kinesin_KIF4A|m.20811	S673; S197	XP_022086353.1 chromosome-associated kinesin KIF4A-like [Acanthaster planci] (id=70.34%; len=1450; e=0.00E+00) ; KIF4A_HUMAN_Chromosome-associated_kinesin_KIF4A	DSPNVSSPSLDFA; DSPNVSSPSLDFA	3	4.368	0.7468	0.383251	0.99639	2	2	2		S673; S197	0.0785908	0.391522	0.791409	0.727302	0.800649	1	0.91842	0.00971159	FC
PMI_026161; Pmi_557820_no_annot|m.10251	S628:S631:S634; S321:S324:S327	XP_022086720.1 nascent polypeptide-associated complex subunit alpha, muscle-specific form-like isoform X1 [Acanthaster planci] (id=58.23%; len=1099; e=0.00E+00) ; no_annot	GKKSPTSPLSPIS,SPTSPLSPISPSS,SPLSPISPSSLKA; GKKSPTSPLSPIS,SPTSPLSPISPSS,SPLSPISPSSLKA	3	2.63	0.3202	0.138604	0.99998	1	1	2		S628:S631:S634; S321:S324:S327	0.0300779	0.875319	0.931465	0.83889	0.813384	0.989074	0.949381	0.00377855	FC
PMI_028550; Pmi_618610_NUP50_RAT_Nuclear_pore_complex_protein_Nup50|m.18207; 16375|m.11098	S144; S155; S155	XP_022082626.1 nuclear pore complex protein Nup50-like [Acanthaster planci] (id=58.15%; len=270; e=8.64E-84) ; NUP50_RAT_Nuclear_pore_complex_protein_Nup50; XP_022082626.1 nuclear pore complex protein Nup50-like [Acanthaster planci] (id=55.46%; len=348; e=8.87E-99)	QTPPSTSPSPQYS; QTPPSTSPSPQYS; QTPPSTSPSPQYS	2,3	2.962	0.657	0.1037	0.99999	3	1	3	1	S144; S155; S155	0.116357	0.308257	0.719698	0.641448	0.727595	1	0.97524	0.000911968	FC	0.119055	0.132875	0.968975	0.377276	0.000817206
PMI_010307; PMI_012964; 41628|m.28321	S56; S70; S60	XP_022108859.1 Golgi SNAP receptor complex member 1-like isoform X2 [Acanthaster planci] (id=94.00%; len=250; e=9.32E-170) ; XP_022108859.1 Golgi SNAP receptor complex member 1-like isoform X2 [Acanthaster planci] (id=97.94%; len=243; e=9.54E-175) ; XP_022108859.1 Golgi SNAP receptor complex member 1-like isoform X2 [Acanthaster planci] (id=98.05%; len=154; e=5.37E-105)	LSSSDTSPLLNAS; LSSSDTSPLLNAS; LSSSDTSPLLNAS	2,3,4	4.319	0.74	0.280845	1	4	5	4		S56; S70; S60	0.048158	0.567968	0.971298	0.874736	0.858202	0.994515	0.984345	0.000365694	FC
PMI_018769	S402	XP_022081030.1 LOW QUALITY PROTEIN: conserved oligomeric Golgi complex subunit 5-like [Acanthaster planci] (id=92.70%; len=808; e=0.00E+00)	DSVYLASPKAETF	3,4	4.945	0.7784	0.073202	1	2	2	3	3	S402	0.0404581	0.365741	0.812845	0.636539	0.80431	1	0.988777	0.000188217	FC	0.100215	0.153541	0.924133	0.0220537	0.00195964
PMI_017930; Pmi_627431_EPG5_HUMAN_Ectopic_P_granules_protein_5_homolog|m.19950; PMI_010907	S527; S505; S364	XP_022106572.1 ectopic P granules protein 5 homolog isoform X3 [Acanthaster planci] (id=79.65%; len=624; e=0.00E+00) ; EPG5_HUMAN_Ectopic_P_granules_protein_5_homolog; XP_022106570.1 ectopic P granules protein 5 homolog isoform X1 [Acanthaster planci] (id=83.61%; len=427; e=0.00E+00)	QAQSPGSPDAPKP; QAQSPGSPDAPKP; QAQSPGSPDAPKP	3,4	3.626	0.7377	0.290695	0.99997	1	2	2	4	S527; S505; S364	0.0664501	0.419525	0.766881	0.559971	0.766185	1	0.967989	0.00152068	FC	0.127824	0.158622	0.959412	0.0735853	0.000114386
PMI_013585; Pmi_641464_AAKB2_HUMAN_5p-AMP-activated_protein_kinase_subunit_beta-2|m.23083; PMI_002742	T20; T20; T20	XP_022083160.1 5'-AMP-activated protein kinase subunit beta-2-like [Acanthaster planci] (id=88.09%; len=277; e=2.57E-179) ; AAKB2_HUMAN_5p-AMP-activated_protein_kinase_subunit_beta-2; XP_022083160.1 5'-AMP-activated protein kinase subunit beta-2-like [Acanthaster planci] (id=89.29%; len=224; e=9.70E-148)	GGPMSPTKENPNA; GGPMSPTKENPNA; GGPMSPTKENPNA	4,5	3.112	0.5987	0.407732	0.99567	1	1	1		T20; T20; T20	0.115371	0.660379	0.700578	0.656573	0.86148	0.96491	0.873263	0.0230756	FC
Pmi_663780_F134C_MOUSE_Protein_FAM134C|m.29473; 56643|m.37473	S170:S173; S162:S165	F134C_MOUSE_Protein_FAM134C; XP_022079724.1 reticulophagy regulator 3-like isoform X1 [Acanthaster planci] (id=74.64%; len=485; e=0.00E+00)	LQQLDHSIDSPHR,LDHSIDSPHREKK; LQQLDHSIDSPHR,LDHSIDSPHREKK	4,5	2.983	0.588	0.144705	1	2	2	2		S170:S173; S162:S165	0.0604913	0.33512	0.728946	0.793338	0.769743	1	0.982575	0.0004528	FC
Pmi_620340_FGOP2_CHICK_FGFR1_oncogene_partner_2_homolog|m.18518	S229	FGOP2_CHICK_FGFR1_oncogene_partner_2_homolog	TPENDQSPKTNSG	2,3	3.289	0.6781	0.141549	1	3	2	4	1	S229	0.0331536	0.558887	0.92747	0.828611	0.755067	0.972905	0.981488	0.000510867	FC	0.0569366	0.101124	0.940523	0.0312489	0.000775733
22927|m.17493	S118	XP_022083806.1 FGFR1 oncogene partner 2 homolog [Acanthaster planci] (id=80.99%; len=121; e=9.68E-61)	TPENDQSPKTNSG	2,3	3.289	0.6781	0.141549	1	3	2	4		S118	0.0331536	0.558887	0.92747	0.828611	0.755067	0.972905	0.981488	0.000510867	FC
PMI_024072; Pmi_653720_DC1I2_MOUSE_Cytoplasmic_dynein_1_intermediate_chain_2|m.26320	S74:S77; S74:S77	XP_022108301.1 cytoplasmic dynein 1 intermediate chain 2-like [Acanthaster planci] (id=85.94%; len=441; e=0.00E+00) ; DC1I2_MOUSE_Cytoplasmic_dynein_1_intermediate_chain_2	LPQSAGSPPSPSK,SAGSPPSPSKSSV; LPQSAGSPPSPSK,SAGSPPSPSKSSV	3,4,5	3.36	0.6404	0.01839	0.99991	2	3	3		S74:S77; S74:S77	0.112327	0.697217	0.898521	0.851651	0.777353	0.98593	0.97052	0.00129075	FC
38112|m.26197; PMI_018839; Pmi_637260_ERC6L_DANRE_DNA_excision_repair_protein_ERCC-6-like|m.22097	S402; S974; S973	XP_022086433.1 DNA excision repair protein ERCC-6-like [Acanthaster planci] (id=77.98%; len=445; e=0.00E+00) ; XP_022086433.1 DNA excision repair protein ERCC-6-like [Acanthaster planci] (id=75.65%; len=1388; e=0.00E+00) ; ERC6L_DANRE_DNA_excision_repair_protein_ERCC-6-like	LDQSTESEKARRK; LDQSTESEKARRK; LDQSTESEKARRK	3,4	5.536	0.7393	1.03463	1	2	2	1	4	S402; S974; S973	0.097718	0.3679	0.850452	0.873231	0.749127	0.987484	0.939795	0.00532781	FC	0.139388	0.197981	0.973752	0.0246003	0.000344721
PMI_028441	S162	XP_022081100.1 synaptophysin-like isoform X1 [Acanthaster planci] (id=70.35%; len=172; e=1.94E-83)	QREQPESPEKVPN	2,3	2.204	0.6879	0.033211	1	7	6	7	5	S162	0.0474998	0.451969	0.885266	0.836923	0.741379	1	0.984458	0.000360447	FC	0.0487019	0.0910849	0.995541	0.0417766	3.57946e-08
81754|m.54922; PMI_008421; Pmi_671081_RIF1_MOUSE_Telomere-associated_protein_RIF1|m.32108; 81755|m.54926; PMI_007430	S924; S1231; S48; S924; S65	XP_022090787.1 telomere-associated protein RIF1-like [Acanthaster planci] (id=62.19%; len=804; e=0.00E+00) ; XP_022090787.1 telomere-associated protein RIF1-like [Acanthaster planci] (id=64.83%; len=1109; e=0.00E+00) ; RIF1_MOUSE_Telomere-associated_protein_RIF1; XP_022090787.1 telomere-associated protein RIF1-like [Acanthaster planci] (id=66.13%; len=1110; e=0.00E+00) ; XP_022090787.1 telomere-a…	KVAAKISPVATRL; RVAAKISPVATRL; KVAAKISPVATRL; KVAAKISPVATRL; KVAAKISPVATRL	2,3	1.871	0.6393	0.234177	1	3	2	2	2	S924; S1231; S48; S924; S65	0.0620842	0.640438	0.690267	0.575228	0.623871	1	0.990702	0.000129271	FC	0.0804031	0.21161	0.968939	0.00906942	0.0011381
PMI_008384; 3196|m.1719	S937; S89	XP_022104697.1 unconventional myosin-IXa-like, partial [Acanthaster planci] (id=83.68%; len=827; e=0.00E+00) ; XP_022097384.1 unconventional myosin-IXa-like, partial [Acanthaster planci] (id=86.67%; len=105; e=1.16E-52)	SFESQPSPSKLNH; SFESQPSPSKLNH	2,3,4	3.442	0.664	0.95667	1	3	3	2		S937; S89	0.0747448	0.583492	0.810581	0.765839	0.709418	1	0.925746	0.00806588	FC
PMI_013390; 25208|m.19005; Pmi_599620_no_annot|m.15106	S191; S67; S90	XP_022099200.1 uncharacterized protein LOC110983880 isoform X1 [Acanthaster planci] (id=56.98%; len=5060; e=0.00E+00) ; XP_022099200.1 uncharacterized protein LOC110983880 isoform X1 [Acanthaster planci] (id=61.70%; len=765; e=0.00E+00) ; no_annot	PSSESSSPSKITS; PSSESSSPSKITS; PSSESSSPSKITS	2,3	4.384	0.5716	0.000329	1	1	2	2		S191; S67; S90	0.0548155	0.172174	0.352528	0.429749	0.594576	1	0.983724	0.000395211	FC
51956|m.34535	S424	XP_022088229.1 MAP kinase-activating death domain protein-like isoform X4 [Acanthaster planci] (id=93.61%; len=736; e=0.00E+00)	LTSMSLSPPPIKD	2,3,4	3.098	0.6592	0.047236	1	6	5	6	2	S424	0.0555489	0.517285	0.83393	0.834031	0.790217	1	0.981987	0.000483758	FC	0.0937278	0.232803	0.935284	0.0454346	0.00514107
PMI_025680; PMI_015032; Pmi_627880_CRK_RAT_Adapter_molecule_crk|m.20042	S80; S80; S152	XP_022099500.1 adapter molecule Crk-like [Acanthaster planci] (id=80.95%; len=252; e=3.38E-148) ; XP_022099500.1 adapter molecule Crk-like [Acanthaster planci] (id=80.95%; len=252; e=1.10E-147) ; CRK_RAT_Adapter_molecule_crk	PAMNSRSPGLGLV; PAMNSRSPGLGLV; PAMNSRSPGLGLV	2	2.202	0.522	0.017443	1	8	9	8	6	S80; S80; S152	0.0492803	0.390285	0.943044	0.939578	0.817604	1	0.989356	0.000169332	FC	0.0520085	0.155804	0.976832	0.00871034	9.61016e-05
Pmi_510540_OSCP1_BOVIN_Protein_OSCP1|m.6763; PMI_003957	S263; S225	OSCP1_BOVIN_Protein_OSCP1; XP_022104427.1 protein OSCP1-like [Acanthaster planci] (id=87.91%; len=339; e=0.00E+00)	TDTTVSSPPQKTA; TDTTVSSPPQKTA	3,4	2.588	0.5796	0.289405	1	3	4	4	3	S263; S225	0.0599008	0.376124	0.640481	0.448746	0.800603	1	0.970481	0.00129424	FC	0.0738288	0.0885394	0.927902	0.388483	0.00186469
PMI_010023; PMI_014301; Pmi_639401_MFSD1_BOVIN_Major_facilitator_superfamily_domain-contain..CUT|m.22737	S31; S31; S31	XP_022095133.1 major facilitator superfamily domain-containing protein 1-like [Acanthaster planci] (id=76.34%; len=486; e=0.00E+00) ; XP_022095133.1 major facilitator superfamily domain-containing protein 1-like [Acanthaster planci] (id=78.81%; len=486; e=0.00E+00) ; MFSD1_BOVIN_Major_facilitator_superfamily_domain-contain..CUT	EKSDENSPLLSSG; EKSDENSPLLSSG; EKSDENSPLLSSG	2	2.154	0.7057	0.857242	1	1	1	1		S31; S31; S31	0.0904773	0.319009	0.787966	0.713815	0.73669	1	0.946573	0.00420537	FC
PMI_026181; Pmi_614431_GCP60_MOUSE_Golgi_resident_protein_GCP60|m.17428; 12790|m.8133	S99; S89; S91	XP_022090653.1 Golgi resident protein GCP60-like [Acanthaster planci] (id=76.80%; len=388; e=2.63E-175) ; GCP60_MOUSE_Golgi_resident_protein_GCP60; XP_022090653.1 Golgi resident protein GCP60-like [Acanthaster planci] (id=82.41%; len=108; e=5.51E-57)	KYDPTNSPPVGYL; KYDPTNSPPVGYL; KYDPTNSPPVGYL	2,3,4	4.676	0.7311	0.008501	1	4	7	6	3	S99; S89; S91	0.136361	0.358313	0.929692	0.814	0.810624	0.97956	0.890432	0.01735	FC	0.0836329	0.107215	0.941756	0.1338	0.00117081
PMI_019245; Pmi_668691_SPAS2_HUMAN_Spermatogenesis-associated_serine-rich_protein_2|m.31138	S392; S202	XP_022109375.1 SPATS2-like protein isoform X1 [Acanthaster planci] (id=70.52%; len=519; e=0.00E+00) ; SPAS2_HUMAN_Spermatogenesis-associated_serine-rich_protein_2	DGPNKHSPRSADD; DGPNKHSPRSADD	3,4	2.218	0.5374	0.234969	1	2	1	1		S392; S202	0.103165	0.387236	0.937332	0.900671	0.835666	0.94543	0.924582	0.00831737	FC
61481|m.40674	S584	XP_011681217.1 PREDICTED: MYCBP-associated protein isoform X3 [Strongylocentrotus purpuratus] (id=57.88%; len=850; e=0.00E+00)	TPERPCSPVDAYI	3,4,5	5.605	0.7583	0.086588	1	2	1	1	2	S584	0.084278	0.218788	0.522936	0.607955	0.609627	1	0.975279	0.000909163	FC	0.20409	0.304368	0.979168	0.0794693	0.000190536
81206|m.54581; 81216|m.54590; PMI_024705; Pmi_657791_DEK_RAT_Protein_DEK|m.27550	T394; T144; T394; T394	XP_022092571.1 protein DEK-like [Acanthaster planci] (id=69.55%; len=509; e=2.14E-171) ; XP_022092571.1 protein DEK-like [Acanthaster planci] (id=67.91%; len=134; e=6.40E-39) ; XP_022092571.1 protein DEK-like [Acanthaster planci] (id=74.63%; len=272; e=4.28E-124) ; DEK_RAT_Protein_DEK	KASIQITPKSKSK; KASIQITPKSKSK; KASIQITPKSKSK; KASIQITPKSKSK	2,3	1.667	0.4366	0.488336	1	2	2	1	1	T394; T144; T394; T394	0.0719026	0.580246	0.662146	0.611804	0.624366	1	0.999905	1.35976e-08	FC	0.223336	0.442795	0.983667	2.76529e-05	9.27331e-07
Pmi_668880_PEX1_HUMAN_Peroxisome_biogenesis_factor_1|m.31217; PMI_014294; PMI_020008; 24767|m.18756	S347:T349; S314:T316; S299:T301; S344:T346	PEX1_HUMAN_Peroxisome_biogenesis_factor_1; XP_022107045.1 uncharacterized protein LOC110988102 [Acanthaster planci] (id=70.59%; len=340; e=3.72E-150) ; XP_022107045.1 uncharacterized protein LOC110988102 [Acanthaster planci] (id=60.48%; len=372; e=5.55E-130) ; XP_022107045.1 uncharacterized protein LOC110988102 [Acanthaster planci] (id=71.77%; len=372; e=2.18E-172)	AKKRALSGTPPGL,KRALSGTPPGLSK; AKKRALSGTPPGL,KRALSGTPPGLSK; AKKRALSGTPPGL,KRALSGTPPGLSK; AKKRALSGTPPGL,KRALSGTPPGLSK	2,3	1.892	0.6222	0.388629	1	3	2	1	1	S347:T349; S314:T316; S299:T301; S344:T346	0.0944895	0.122967	0.384007	0.471919	0.557679	1	0.973594	0.00103673	FC	0.38759	0.47063	0.997233	0.139402	0.00239129
10871|m.6693; PMI_005222; Pmi_628863_no_annot|m.20270	S70; S432; S323	XP_022111788.1 uncharacterized protein LOC110991023 isoform X6 [Acanthaster planci] (id=75.89%; len=112; e=3.23E-34) ; XP_022111785.1 uncharacterized protein LOC110991023 isoform X4 [Acanthaster planci] (id=65.89%; len=686; e=0.00E+00) ; no_annot	STQSPTSPSNSDS; STQSPTSPSNSDS; STQSPTSPSNSDS	3	3.706	0.6079	0.052005	0.99998	1	1	1		S70; S432; S323	0.0811903	0.161739	0.235197	0.256644	0.315258	1	0.997001	1.34808e-05	FC
PMI_017515	S514	XP_022106314.1 protein-associating with the carboxyl-terminal domain of ezrin-like [Acanthaster planci] (id=78.09%; len=776; e=0.00E+00)	IHSEELSPRFEET	3	2.125	0.6381	1.8322	1	1	1	1		S514	0.0489841	0.239001	0.519323	0.684949	0.665288	1	0.967923	0.00152687	FC
PMI_004365; PMI_007969	S187; S187	XP_022107013.1 claspin-like [Acanthaster planci] (id=59.90%; len=1399; e=0.00E+00) ; XP_022107013.1 claspin-like [Acanthaster planci] (id=51.96%; len=383; e=5.81E-98)	ESGQDISLEEENE; ESGQDISLEEENE	3	4.33	0.7271	0.269699	1	1	1	1		S187; S187	0.0884467	0.39866	0.67484	0.694807	0.721933	1	0.937189	0.00579395	FC
62508|m.41294; Pmi_649180_SAPC2_MOUSE_Suppressor_APC_domain-containing_protein_2|m.25075	S187; S187	XP_022085276.1 suppressor APC domain-containing protein 2-like [Acanthaster planci] (id=80.32%; len=498; e=0.00E+00) ; SAPC2_MOUSE_Suppressor_APC_domain-containing_protein_2	LKLKRRSAPGDIN; LKLKRRSAPGDIN	2,3,4	5.197	0.6358	0.302329	1	1	2	1	1	S187; S187	0.0472886	0.340149	0.617149	0.644441	0.747811	1	0.928994	0.00738388	FC	0.884713	0.65255	0.768624	0.154371	0.379737
Pmi_562950_RGPA1_PIG_Ral_GTPase-activating_protein_subunit_alpha-1|m.10690; 2301|m.1202	S343; S129	RGPA1_PIG_Ral_GTPase-activating_protein_subunit_alpha-1; XP_022083005.1 ral GTPase-activating protein subunit alpha-1-like isoform X2 [Acanthaster planci] (id=88.81%; len=143; e=2.86E-73)	GETPTVSPSTTLN; GETPTVSPSTTLN	3	2.731	0.5657	0.604512	0.99457	1	1	1		S343; S129	0.0602781	0.343989	0.896582	0.819485	0.741617	0.950173	0.963568	0.00196677	FC
Pmi_550600_HYDIN_MOUSE_Hydrocephalus-inducing_protein|m.9644; PMI_000024	S310; S2093	HYDIN_MOUSE_Hydrocephalus-inducing_protein; XP_022110484.1 hydrocephalus-inducing protein homolog, partial [Acanthaster planci] (id=87.31%; len=3019; e=0.00E+00)	TKGQATSPTISQE; TKGQATSPTISQE	2,3	3.557	0.6396	0.062536	0.99556	1	2	2		S310; S2093	0.0564413	0.346815	0.679862	0.820349	0.765009	0.955859	0.920889	0.00914018	FC
Pmi_626860_SPEF2_HUMAN_Sperm_flagellar_protein_2|m.19849; PMI_007038	T63; T435	SPEF2_HUMAN_Sperm_flagellar_protein_2; XP_022100240.1 sperm flagellar protein 2-like isoform X1 [Acanthaster planci] (id=89.94%; len=895; e=0.00E+00)	TPTPPPTPPPATE; TPTPPPTPPPATE	3,4	3.5	0.758	0.021352	1	6	5	3	4	T63; T435	0.0712274	0.435536	0.86016	0.765973	0.723455	0.900455	0.849203	0.0323951	FC	0.0988108	0.168049	0.987744	0.000763414	1.08101e-07
Pmi_646920_PDXD1_XENLA_Pyridoxal-dependent_decarboxylase_domain-cont..CUT|m.24449; 15150|m.10004; PMI_002525	S397; S14; S72	PDXD1_XENLA_Pyridoxal-dependent_decarboxylase_domain-cont..CUT; XP_022102401.1 pyridoxal-dependent decarboxylase domain-containing protein 1-like isoform X2 [Acanthaster planci] (id=90.78%; len=217; e=2.56E-135) ; XP_022102400.1 putative pyridoxal-dependent decarboxylase domain-containing protein 2 isoform X1 [Acanthaster planci] (id=63.83%; len=506; e=0.00E+00)	LGSINLSPGKGSS; LGSINLSPGKGSS; LGSINLSPGKGSS	2,3,4,5	4.94	0.6634	0.001364	1	10	10	9	8	S397; S14; S72	0.0629501	0.524821	0.86906	0.876657	0.725286	0.996913	0.985976	0.00029361	FC	0.0571023	0.0913411	0.961521	0.083024	0.000740568
69074|m.46050; PMI_019638; Pmi_652412_RNF31_HUMAN_E3_ubiquitin-protein_ligase_RNF31|m.25963	S59; S492; S407	XP_022084014.1 E3 ubiquitin-protein ligase RNF31-like isoform X2 [Acanthaster planci] (id=61.27%; len=1247; e=0.00E+00) ; XP_022084012.1 E3 ubiquitin-protein ligase RNF31-like isoform X1 [Acanthaster planci] (id=64.04%; len=545; e=0.00E+00) ; RNF31_HUMAN_E3_ubiquitin-protein_ligase_RNF31	PKNIVLSPVSSQD; PKNIVLSPVSSQD; PKNIVLSPVSSQD	3,4	6.457	0.7716	0.050564	1	3	4	4	5	S59; S492; S407	0.0774687	0.482166	0.909608	0.804276	0.780022	0.973192	0.951394	0.00348634	FC	0.0807703	0.131744	0.981679	0.0525951	9.59182e-05
Pmi_645440_GPTC1_BOVIN_G_patch_domain-containing_protein_1|m.24107; PMI_020566; PMI_023642; 18041|m.12602	S176:S179; S220:S223; S33:S36; S176:S179	GPTC1_BOVIN_G_patch_domain-containing_protein_1; XP_022110491.1 G patch domain-containing protein 1-like, partial [Acanthaster planci] (id=52.51%; len=379; e=7.30E-102) ; XP_022110491.1 G patch domain-containing protein 1-like, partial [Acanthaster planci] (id=65.78%; len=453; e=0.00E+00) ; XP_022110491.1 G patch domain-containing protein 1-like, partial [Acanthaster planci] (id=71.34%; len=314; …	RRRKKKSAPSDLD,KKKSAPSDLDVKA; RRRKKKSAPSDLD,KKKSAPSDLDVKA; RRRKKKSAPSDLD,KKKSAPSDLDVKA; RRRKKKSAPSDLD,KKKSAPSDLDVKA	2,4	1.662	0.3899	0.133171	1	2	1	1		S176:S179; S220:S223; S33:S36; S176:S179	0.0564343	0.315053	0.714451	0.73482	0.737296	1	0.991094	0.000118635	FC
Pmi_637920_CX058_HUMAN_Putative_uncharacterized_protein_CXorf58|m.22227; PMI_007417	S65; S54	CX058_HUMAN_Putative_uncharacterized_protein_CXorf58; XP_022095200.1 putative uncharacterized protein CXorf58 [Acanthaster planci] (id=85.96%; len=406; e=0.00E+00)	PKKTQPSPVLQQR; PKKTQPSPVLQQR	2,3	1.812	0.5296	0.090999	1	2	1	1	1	S65; S54	0.063744	0.356429	0.851919	0.871733	0.813926	1	0.9934	6.52034e-05	FC	0.119743	0.172925	0.97624	0.000236361	0.000127329
PMI_017922; PMI_010006; Pmi_615380_CCDC6_HUMAN_Coiled-coil_domain-containing_protein_6|m.17584	S233; S373; S427	XP_022096426.1 coiled-coil domain-containing protein 6-like isoform X4 [Acanthaster planci] (id=94.40%; len=232; e=9.71E-147) ; XP_022096348.1 coiled-coil domain-containing protein 6-like isoform X3 [Acanthaster planci] (id=84.43%; len=424; e=0.00E+00) ; CCDC6_HUMAN_Coiled-coil_domain-containing_protein_6	KPTAPTS------; KPTAPTS------; KPTAPTS------	2	1.569	0.6016	0.044418	0.9986	2	3	1	1	S233; S373; S427	0.0579083	0.390324	0.939449	0.915535	0.728747	1	0.994	5.38994e-05	FC	0.038539	0.0881124	0.968093	0.00550207	0.000130872
PMI_016105; Pmi_596310_PTSS1_DANRE_Phosphatidylserine_synthase_1|m.14647	S21; S22	XP_022101472.1 phosphatidylserine synthase 1-like [Acanthaster planci] (id=64.65%; len=447; e=0.00E+00) ; PTSS1_DANRE_Phosphatidylserine_synthase_1	RRNHRRSASEISD; RRNHRRSASEISD	2	1.789	0.5802	0.254256	0.99999	2	2	1		S21; S22	0.216568	0.35782	0.652808	0.775532	0.881421	0.996428	0.891202	0.0171116	FC
16967|m.11638; PMI_019747; Pmi_651770_TDRD1_HUMAN_Tudor_domain-containing_protein_1|m.25775	S346:S354:S361; S1576:S1584:S1591; S1051:S1059:S1066	XP_022086654.1 uncharacterized protein LOC110977121 isoform X1 [Acanthaster planci] (id=68.61%; len=411; e=3.36E-178) ; XP_022086654.1 uncharacterized protein LOC110977121 isoform X1 [Acanthaster planci] (id=62.96%; len=1385; e=0.00E+00) ; TDRD1_HUMAN_Tudor_domain-containing_protein_1	PGPTTKSPQPVSA,QPVSATSPAGPVV,PAGPVVSPKAATS; PGPTTKSPQPVSA,QPVSATSPAGPVV,PAGPVVSPKAATS; PGPTTKSPQPVSA,QPVSATSPAGPVV,PAGPVVSPKAATS	3,4	4.295	0.7334	0.137105	1	1	1	3		S346:S354:S361; S1576:S1584:S1591; S1051:S1059:S1066	0.0412254	0.286356	0.889928	0.818978	0.707709	1	0.973438	0.00104894	FC
36684|m.25473; Pmi_644641_SNP25_RAT_Synaptosomal-associated_protein_25|m.23934	T130:S132; T165:S167	XP_022086554.1 uncharacterized protein LOC110977066 isoform X2 [Acanthaster planci] (id=77.15%; len=674; e=0.00E+00) ; SNP25_RAT_Synaptosomal-associated_protein_25	LHVRHLTPSPVLF,VRHLTPSPVLFVD; LHVRHLTPSPVLF,VRHLTPSPVLFVD	2,3	2.978	0.7216	0.055525	1	4	3	2	1	T130:S132; T165:S167	0.0505803	0.46532	0.920849	0.838277	0.763635	0.980517	0.96102	0.00224958	FC	0.154408	0.175308	0.948558	0.44886	7.56766e-05
58183|m.38512; PMI_003140	S221; S249	XP_022098496.1 activating signal cointegrator 1 complex subunit 2-like [Acanthaster planci] (id=76.32%; len=680; e=0.00E+00) ; XP_022098496.1 activating signal cointegrator 1 complex subunit 2-like [Acanthaster planci] (id=70.81%; len=483; e=0.00E+00)	KTGSDLSPVALPT; KTGSDLSPVALPT	2,3	2.14	0.6046	0.002117	1	6	4	5	3	S221; S249	0.0697614	0.393169	0.877339	0.887295	0.788914	1	0.983709	0.000395951	FC	0.0956148	0.177052	0.954649	0.00673802	0.000561341
Pmi_570924_PKHG5_HUMAN_Pleckstrin_homology_domain-containing_family_G_..CUT|m.11494	S92	PKHG5_HUMAN_Pleckstrin_homology_domain-containing_family_G_..CUT	NSKAVISPSFAQK	2,3	2.634	0.5305	0.300389	1	4	3	6	2	S92	0.0445084	0.380674	0.861611	0.875704	0.802758	1	0.990331	0.000139779	FC	0.0748308	0.186049	0.959059	0.000341803	0.000787771
12346|m.7788; PMI_027430; 12347|m.7789; Pmi_668321_ARHGC_HUMAN_Rho_guanine_nucleotide_exchange_factor_12|m.31058	T126; T32; T126; T126	XP_022109351.1 rho guanine nucleotide exchange factor 12-like [Acanthaster planci] (id=81.29%; len=310; e=0.00E+00) ; XP_022109351.1 rho guanine nucleotide exchange factor 12-like [Acanthaster planci] (id=69.33%; len=150; e=3.81E-62) ; XP_022109351.1 rho guanine nucleotide exchange factor 12-like [Acanthaster planci] (id=81.29%; len=310; e=0.00E+00) ; ARHGC_HUMAN_Rho_guanine_nucleotide_exchange_f…	TRPVAVTPEKDAE; TRPVAVTPEKDAE; TRPVAVTPEKDAE; TRPVAVTPEKDAE	3,4,5	2.27	0.5608	0.061589	1	5	1	4	5	T126; T32; T126; T126	0.0677857	0.71826	0.897671	0.960585	0.809044	0.992781	0.978612	0.000681252	FC	0.102328	0.156742	0.971238	0.0077524	7.18901e-05
PMI_016678; PMI_001376	S931; S1019	XP_022082824.1 kinesin-like protein KIF18A isoform X2 [Acanthaster planci] (id=75.40%; len=1069; e=0.00E+00) ; XP_022082824.1 kinesin-like protein KIF18A isoform X2 [Acanthaster planci] (id=69.40%; len=732; e=0.00E+00)	MPNQKISPVTGRV; MPNQKISPVTGRV	3,4	5.679	0.7445	0.090829	1	3	5	2		S931; S1019	0.0982954	0.700171	0.581642	0.784692	0.751063	1	0.95103	0.00353832	FC
PMI_011267	S829	XP_022090036.1 protein ELYS-like [Acanthaster planci] (id=61.41%; len=767; e=0.00E+00)	ALSFIFSPPHTRS	3,4	4.795	0.719	0.207048	1	2	3	4		S829	0.0647906	0.796796	0.763167	0.827423	0.778517	1	0.97876	0.00067193	FC
Pmi_644283_CI085_RAT_Uncharacterized_protein_C9orf85_homolog|m.23832; 45064|m.30265	S207; S207	CI085_RAT_Uncharacterized_protein_C9orf85_homolog; XP_022101248.1 histone H1.0-like [Acanthaster planci] (id=67.44%; len=258; e=1.68E-97)	RKKTATSPALAKT; RKKTATSPALAKT	2,3,4	2.915	0.5053	0.012606	1	18	21	25	13	S207; S207	0.0639139	0.824708	0.929277	0.875246	0.763842	1	0.996786	1.54757e-05	FC	0.0673678	0.206597	0.981813	0.00166481	0.000352209
PMI_013459	S347	XP_022094756.1 DUF21 domain-containing protein At4g14240-like isoform X2 [Acanthaster planci] (id=81.05%; len=496; e=0.00E+00)	DTAIPRSPLESAD	2,3,4	5.845	0.7415	0.061629	1	6	5	5		S347	0.060184	0.680668	0.92851	0.835037	0.671667	0.982461	0.97057	0.0012864	FC
58703|m.38896; 58702|m.38894; PMI_028373	S6; S6; S632	XP_022094427.1 uncharacterized protein LOC110981281 [Acanthaster planci] (id=49.11%; len=843; e=0.00E+00) ; XP_022094427.1 uncharacterized protein LOC110981281 [Acanthaster planci] (id=49.35%; len=847; e=0.00E+00) ; XP_022094427.1 uncharacterized protein LOC110981281 [Acanthaster planci] (id=62.73%; len=888; e=0.00E+00)	-WGRKPSLLDDGS; -WGRKPSLLDDGS; GWGRKPSLLDDGS	3	1.986	0.6279	0.427559	1	1	1	1		S6; S6; S632	0.0543869	0.18274	0.741993	0.81073	0.86258	1	0.990269	0.000141564	FC
PMI_010916; PMI_010296; Pmi_639190_ATG7_CHICK_Ubiquitin-like_modifier-activating_enzyme_ATG7|m.22516	S380; S187; S543	XP_022098449.1 ubiquitin-like modifier-activating enzyme ATG7 [Acanthaster planci] (id=71.60%; len=595; e=0.00E+00) ; XP_022098449.1 ubiquitin-like modifier-activating enzyme ATG7 [Acanthaster planci] (id=75.46%; len=379; e=0.00E+00) ; ATG7_CHICK_Ubiquitin-like_modifier-activating_enzyme_ATG7	LPLSPKSPSFLCI; LPLSPKSPSFLCI; LPLSPKSPSFLCI	2,3	3.223	0.6183	0.060481	1	2	3	4	2	S380; S187; S543	0.0546032	0.439816	0.797987	0.775711	0.695292	1	0.98846	0.000199001	FC	0.0690266	0.133965	0.985962	0.0567406	5.86691e-07
75394|m.50329; PMI_026273; Pmi_638351_LARP6_MOUSE_La-related_protein_6|m.22327	S446:S451; S399:S404; S399:S404	XP_022105865.1 la-related protein 6-like [Acanthaster planci] (id=84.82%; len=527; e=0.00E+00) ; XP_022105865.1 la-related protein 6-like [Acanthaster planci] (id=85.01%; len=527; e=0.00E+00) ; LARP6_MOUSE_La-related_protein_6	SVPQSKSPAHLSP,KSPAHLSPSNTPK; SVPQSKSPAHLSP,KSPAHLSPSNTPK; SVPQSKSPAHLSP,KSPAHLSPSNTPK	2,3,4	2.937	0.7142	0.307666	1	4	3	5	1	S446:S451; S399:S404; S399:S404	0.0629183	0.893045	0.564389	0.816433	0.798456	0.918099	0.869875	0.0242972	FC	0.464386	0.460736	0.919311	0.969361	0.0164313
68294|m.45532; 68293|m.45529; Pmi_661270_KI67_HUMAN_Antigen_KI-67|m.29501; 68305|m.45564; 68308|m.45566	S151; S151; S1201; S151; S151	XP_022080667.1 nascent polypeptide-associated complex subunit alpha, muscle-specific form-like [Acanthaster planci] (id=81.82%; len=198; e=4.34E-93) ; XP_022080667.1 nascent polypeptide-associated complex subunit alpha, muscle-specific form-like [Acanthaster planci] (id=69.87%; len=468; e=1.45E-170) ; KI67_HUMAN_Antigen_KI-67; XP_022080667.1 nascent polypeptide-associated complex subunit alpha, m…	MSEKFVSPLKDSK; MSEKFVSPLKDSK; MSEKFVSPLKDSK; MSEKFVSPLKDSK; MSEKFVSPLKDSK	2,3	1.441	0.5011	0.251327	1	2	3	2	1	S151; S151; S1201; S151; S151	0.0608625	0.20087	0.16802	0.524704	0.440951	1	0.995466	3.07939e-05	FC	0.782555	0.887469	0.511051	0.335449	4.85668e-05
PMI_008871; Pmi_669102_DYHC1_MOUSE_Cytoplasmic_dynein_1_heavy_chain_1|m.31311; PMI_021860	S602; S2089; S585	XP_022096690.1 cytoplasmic dynein 1 heavy chain 1-like isoform X2 [Acanthaster planci] (id=87.17%; len=748; e=0.00E+00) ; DYHC1_MOUSE_Cytoplasmic_dynein_1_heavy_chain_1; XP_022096690.1 cytoplasmic dynein 1 heavy chain 1-like isoform X2 [Acanthaster planci] (id=94.44%; len=612; e=0.00E+00)	RKKRPGSTSDGRP; RKKRPGSTSDGRP; RKKRPGSTSDGRP	3,4,5	1.383	0.5103	0.032324	0.99119	11	3	6	6	S602; S2089; S585	0.0741364	0.686534	0.872789	0.951029	0.864586	0.992899	0.97618	0.000844317	FC	0.127321	0.316303	0.912801	0.0146833	0.0051745
Pmi_639030_no_annot|m.22522	S183	no_annot	PTVAISSPGPAIE	3,4,5	6.673	0.7377	0.018042	1	41	45	41		S183	0.0607509	0.639364	0.928958	0.832876	0.751891	1	0.989733	0.000157569	FC
PMI_000044	S278	XP_022099081.1 protein cordon-bleu-like isoform X6 [Acanthaster planci] (id=68.03%; len=513; e=2.38E-155)	PPPRPISPPVRTS	4	2.808	0.5299	0.221108	1	1	1	1		S278	0.0683414	0.379077	0.258684	0.429807	0.442319	1	0.826096	0.0427344	FC
PMI_011555; Pmi_650830_OSBL3_MOUSE_Oxysterol-binding_protein-related_protein_3|m.25512	S196; S196	XP_022111515.1 oxysterol-binding protein-related protein 6-like isoform X3 [Acanthaster planci] (id=77.05%; len=475; e=0.00E+00) ; OSBL3_MOUSE_Oxysterol-binding_protein-related_protein_3	PTHPAASPTSEIT; PTHPAASPTSEIT	2,3	3.479	0.6679	0.066951	1	8	3	5	3	S196; S196	0.0561313	0.32067	0.8513	0.904327	0.79548	1	0.995069	3.64087e-05	FC	0.099476	0.164985	0.958263	0.0269322	0.00067928
PMI_016558; Pmi_624833_ARMC1_MOUSE_Armadillo_repeat-containing_protein_1|m.19420	S104; S104	XP_022089678.1 armadillo repeat-containing protein 1-like [Acanthaster planci] (id=84.64%; len=280; e=2.89E-178) ; ARMC1_MOUSE_Armadillo_repeat-containing_protein_1	TLTTPPSPSPLKE; TLTTPPSPSPLKE	2,3	2.872	0.6858	0.029939	1	2	2	2	4	S104; S104	0.0884208	0.589159	0.781351	0.786386	0.844648	1	0.934085	0.00637399	FC	0.286272	0.409335	0.930891	0.0749253	0.00150134
Pmi_607460_RGPD2_HUMAN_RANBP2-like_and_GRIP_domain-containing_protein_2|m.16314	S822:S835	RGPD2_HUMAN_RANBP2-like_and_GRIP_domain-containing_protein_2	RNASRLSDVAPLE,AAGNDPSPRRLAA	2,3	4.53	0.7515	0.101823	1	5	4	6		S822:S835	0.0632064	0.636658	0.649645	0.798048	0.823414	0.981027	0.942722	0.00482712	FC
PMI_019471; Pmi_500850_BRSK2_HUMAN_Serine/threonine-protein_kinase_BRSK2|m.6219; PMI_000158	S54; S159; S245	XP_022082742.1 LOW QUALITY PROTEIN: serine/threonine-protein kinase BRSK2-like [Acanthaster planci] (id=73.87%; len=421; e=0.00E+00) ; BRSK2_HUMAN_Serine/threonine-protein_kinase_BRSK2; XP_022082742.1 LOW QUALITY PROTEIN: serine/threonine-protein kinase BRSK2-like [Acanthaster planci] (id=76.71%; len=644; e=0.00E+00)	RKQRKPSFEDESE; RKQRKPSFEDESE; RKQRKPSFEDESE	2,3,4	2.67	0.6479	0.412258	1	2	2	3	3	S54; S159; S245	0.0489119	0.390541	0.875678	0.881301	0.73806	1	0.989375	0.00016873	FC	0.120252	0.360453	0.993033	0.00577134	6.62522e-06
Pmi_580910_TM1L2_HUMAN_TOM1-like_protein_2|m.12625; 9255|m.5542; 9256|m.5544	S137; S137; S137	TM1L2_HUMAN_TOM1-like_protein_2; XP_022092307.1 TOM1-like protein 2 isoform X4 [Acanthaster planci] (id=81.65%; len=218; e=1.22E-123) ; XP_022092307.1 TOM1-like protein 2 isoform X4 [Acanthaster planci] (id=83.18%; len=214; e=1.10E-124)	TNLDELSPIVTPQ; TNLDELSPIVTPQ; TNLDELSPIVTPQ	3	4.017	0.644	0.142594	1	6	5	5		S137; S137; S137	0.0488406	0.247863	0.293013	0.431397	0.553671	1	0.995176	3.48459e-05	FC
Pmi_552320_no_annot|m.9796	S18	no_annot	DTAIPRSPLESAD	2,3	4.085	0.6307	0.175186	1	4	4	4		S18	0.0565939	0.698148	0.912976	0.845885	0.667127	0.99697	0.970268	0.00131287	FC
PMI_002915; Pmi_375890_no_annot|m.2292	S1718; S56	XP_022089863.1 brefeldin A-inhibited guanine nucleotide-exchange protein 3-like isoform X5 [Acanthaster planci] (id=75.50%; len=2192; e=0.00E+00) ; no_annot	ADGRPLSPKVSSP; ADGRPLSPKVSSP	3,4	2.797	0.5649	0.107312	1	2	2	2	1	S1718; S56	0.0905741	0.476675	0.865962	0.736733	0.787876	0.972491	0.872526	0.0233388	FC	0.231413	0.295413	0.953839	0.111715	0.000207977
PMI_009283; Pmi_653410_VPS53_CHICK_Vacuolar_protein_sorting-associated_protein_5..CUT|m.26222	S390; S392	XP_022086278.1 vacuolar protein sorting-associated protein 53 homolog isoform X2 [Acanthaster planci] (id=95.59%; len=839; e=0.00E+00) ; VPS53_CHICK_Vacuolar_protein_sorting-associated_protein_5..CUT	PPAKIDSPEMPTN; PPAKIDSPEMPTN	3	3.739	0.681	0.028404	1	2	1	2		S390; S392	0.185153	0.411238	0.748038	0.758266	0.746762	1	0.97351	0.00104331	FC
44086|m.29671	S53	XP_022106064.1 protein unc-119 homolog B-like [Acanthaster planci] (id=94.49%; len=236; e=6.70E-158)	KKATSGSAEITEE	3,4	4.082	0.5483	0.113799	0.99743	2	4	3	2	S53	0.0706045	0.13442	0.737513	0.771144	0.791375	1	0.992098	9.34118e-05	FC	0.141584	0.239156	0.921759	0.0294846	0.00440833
Pmi_365640_HD_RAT_Huntingtin|m.2059; PMI_016329; 42673|m.28870	S677; S475; S47	HD_RAT_Huntingtin; XP_022080674.1 huntingtin-like isoform X2 [Acanthaster planci] (id=86.76%; len=1405; e=0.00E+00) ; XP_022080673.1 huntingtin-like isoform X1 [Acanthaster planci] (id=86.89%; len=1091; e=0.00E+00)	RQDINQSPSGNRP; RQDINQSPSGNRP; RQDINQSPSGNRP	3,4	3.649	0.7298	0.298165	0.9998	1	3	1		S677; S475; S47	0.0618535	0.382865	0.83253	0.866667	0.737511	0.998782	0.980466	0.000568646	FC
683|m.337; PMI_013991	S29; S1227	XP_022098980.1 neurobeachin-like isoform X2 [Acanthaster planci] (id=95.69%; len=116; e=2.80E-65) ; XP_022098984.1 neurobeachin-like isoform X5 [Acanthaster planci] (id=86.05%; len=1828; e=0.00E+00)	NLAGPTSPIKDLG; NLAGPTSPIKDLG	3	3.303	0.7169	0.648094	1	1	1	1	1	S29; S1227	0.0755588	0.23657	0.656886	0.759636	0.777304	1	0.974604	0.000959269	FC	0.0481581	0.0878929	0.949313	0.135473	0.00303617
61510|m.40688; Pmi_654990_no_annot|m.26690	S110; S98	XP_022080667.1 nascent polypeptide-associated complex subunit alpha, muscle-specific form-like [Acanthaster planci] (id=65.55%; len=238; e=4.83E-63) ; no_annot	IEAPTVSPKTTRS; IEAPTVSPKTTRS	2,3,4	4.018	0.6525	0.346884	1	7	8	5	3	S110; S98	0.075777	0.71625	0.885331	0.782137	0.815997	1	0.987264	0.000242294	FC	0.108521	0.233635	0.989405	0.000523315	3.27744e-07
57587|m.38055; Pmi_643850_RHGBA_HUMAN_Rho_GTPase-activating_protein_11A|m.23688	T300; T518	XP_022097299.1 uncharacterized protein LOC110982869 [Acanthaster planci] (id=66.02%; len=671; e=0.00E+00) ; RHGBA_HUMAN_Rho_GTPase-activating_protein_11A	GHRHTRTQPTPIQ; GHRHTRTQPTPIQ	2,3,4	5.297	0.7147	0.033529	1	3	2	1		T300; T518	0.072704	0.0923537	0.162377	0.784993	0.356704	1	0.990751	0.000127924	FC
59075|m.39106	S56	XP_022084220.1 rab GTPase-activating protein 1-like isoform X2 [Acanthaster planci] (id=93.87%; len=995; e=0.00E+00)	DDFDRLSPSHVGV	3,4,5	3.106	0.621	0.006418	0.99999	11	14	18	8	S56	0.074989	0.429964	0.864877	0.868401	0.812428	1	0.989653	0.000160031	FC	0.0476009	0.086466	0.941674	0.109206	0.00162305
PMI_007248	S1364	XP_022095069.1 zinc finger CCCH domain-containing protein 13-like isoform X2 [Acanthaster planci] (id=66.81%; len=1657; e=0.00E+00)	DRQDRRSDDREKQ	3,4	1.889	0.5558	0.135524	1	2	2	2	2	S1364	0.0655393	0.13455	0.730511	0.75064	0.827652	1	0.942586	0.00484986	FC	0.126341	0.243962	0.967539	0.000293063	0.000140938
PMI_000552; PMI_000553	S719; S264	XP_022083368.1 sperm-associated antigen 1-like isoform X2 [Acanthaster planci] (id=54.65%; len=904; e=0.00E+00) ; XP_022083368.1 sperm-associated antigen 1-like isoform X2 [Acanthaster planci] (id=63.21%; len=386; e=1.20E-132)	KTSEVKSPEVKPA; KTSEVKSPEVKPA	3,4,5	1.517	0.4548	0.065169	1	1	1	2		S719; S264	0.105677	0.37194	0.720189	0.811325	0.705759	0.952342	0.902039	0.0139246	FC
Pmi_634400_UBE3A_HUMAN_Ubiquitin-protein_ligase_E3A|m.21415; PMI_013285; 64836|m.43125	S24; S24; S24	UBE3A_HUMAN_Ubiquitin-protein_ligase_E3A; XP_022103087.1 ubiquitin-protein ligase E3A-like [Acanthaster planci] (id=84.58%; len=960; e=0.00E+00) ; XP_022103087.1 ubiquitin-protein ligase E3A-like [Acanthaster planci] (id=84.27%; len=960; e=0.00E+00)	SQVTQRSPATSPD; SQVTQRSPATSPD; SQVTQRSPATSPD	2,3,4	2.214	0.6463	0.06403	1	10	12	7	3	S24; S24; S24	0.0633867	0.503637	0.883209	0.840325	0.868531	0.996408	0.969167	0.00141137	FC	0.0732749	0.104555	0.946013	0.0305329	0.00102663
43621|m.29396; Pmi_583951_no_annot|m.12970	S18; S44	XP_022083916.1 uncharacterized protein LOC110975618 [Acanthaster planci] (id=78.36%; len=171; e=7.43E-86) ; no_annot	LPEADHSPVADDT; LPEADHSPVADDT	3	5.153	0.8291	0.986719	1	2	1	2		S18; S44	0.100238	0.355445	0.664261	0.599309	0.738041	1	0.930405	0.00709659	FC
PMI_005627; Pmi_7378810_no_annot|m.33747	S509; S83	XP_022095926.1 major facilitator superfamily domain-containing protein 4A-like [Acanthaster planci] (id=68.78%; len=551; e=0.00E+00) ; no_annot	AYLVVGSPEQIPL; AYLVVGSPEQIPL	2,3	3.084	0.6911	0.140116	1	2	2	1		S509; S83	0.0308578	0.310716	0.876841	0.728659	0.75081	0.9532	0.886204	0.0186874	FC
PMI_025998; 1158|m.577	S473:S476; S105:S108	XP_022102124.1 TBC1 domain family member 10A-like [Acanthaster planci] (id=80.51%; len=467; e=0.00E+00) ; 1158|g.577 type:internal len:126 gc:universal 1158:2-376(+)	HRGTGESPGSPGI,TGESPGSPGIEQP; HRGTGESPGSPGI,TGESPGSPGIEQP	2,3,4	3.679	0.6475	0.019193	1	6	9	6	2	S473:S476; S105:S108	0.0464034	0.513557	0.900769	0.848224	0.736282	1	0.991442	0.000109534	FC	0.113018	0.151922	0.931763	0.0939342	0.00100076
PMI_004225; Pmi_666820_ITSN1_XENLA_Intersectin-1|m.30459	T529; T1016	XP_022081646.1 intersectin-1-like isoform X1 [Acanthaster planci] (id=86.72%; len=1107; e=0.00E+00) ; ITSN1_XENLA_Intersectin-1	TTPTTPTPDGTCQ; TTPTTPTPDGTCQ	3,4	4.089	0.7141	0.140608	0.99056	2	2	2	1	T529; T1016	0.0668533	0.249567	0.789029	0.734468	0.878792	1	0.879197	0.0210087	FC	0.0759583	0.132102	0.891361	0.0267442	0.00365771
59075|m.39106; PMI_012213; PMI_012867	S201; S329; S127	XP_022084220.1 rab GTPase-activating protein 1-like isoform X2 [Acanthaster planci] (id=93.87%; len=995; e=0.00E+00) ; XP_022084218.1 rab GTPase-activating protein 1-like isoform X1 [Acanthaster planci] (id=88.60%; len=658; e=0.00E+00) ; XP_022084220.1 rab GTPase-activating protein 1-like isoform X2 [Acanthaster planci] (id=91.52%; len=460; e=0.00E+00)	FHRVPRSPGLVDS; FHRVPRSPGLVDS; FHRVPRSPGLVDS	2,3	4.258	0.7757	0.250842	1	5	4	6	11	S201; S329; S127	0.0582831	0.477488	0.896665	0.892792	0.806833	0.996037	0.985559	0.000311308	FC	0.0768074	0.195437	0.966349	0.00561143	5.50982e-05
PMI_026980; Pmi_475020_no_annot|m.4957	S217; S108	XP_022093588.1 MKL/myocardin-like protein 1 isoform X1 [Acanthaster planci] (id=84.82%; len=988; e=0.00E+00) ; no_annot	SPSQLLSPKAGQT; SPSQLLSPKAGQT	2,3	3.274	0.581	0.034297	1	3	3	3	2	S217; S108	0.0655686	0.159933	0.0486752	0.130477	0.140248	1	0.998504	3.3564e-06	FC	0.945216	0.667964	0.971583	0.00203251	0.48377
Pmi_653770_FA65A_RAT_Protein_FAM65A|m.26324	S292	FA65A_RAT_Protein_FAM65A	SRSDLKSPTSGIP	3	1.823	0.6275	0.35464	0.99568	1	1	1		S292	0.0782536	0.722002	0.958524	0.894664	0.919224	0.963446	0.957291	0.00269715	FC
76867|m.51366; Pmi_660744_KS6A3_MOUSE_Ribosomal_protein_S6_kinase_alpha-3|m.28481	S23:S24; S23:S24	BAB85907.1 p90 ribosomal S6 kinase [Patiria pectinifera] (id=99.32%; len=738; e=0.00E+00) ; KS6A3_MOUSE_Ribosomal_protein_S6_kinase_alpha-3	EQAEGKSSEEMLV,QAEGKSSEEMLVD; EQAEGKSSEEMLV,QAEGKSSEEMLVD	3,4	5.295	0.6848	0.120526	1	7	10	6	5	S23:S24; S23:S24	0.0554803	0.128641	0.545216	0.631382	0.803944	1	0.989584	0.000162171	FC	0.142511	0.253067	0.974295	0.0292223	0.000138096
Pmi_637400_RHG17_HUMAN_Rho_GTPase-activating_protein_17|m.22118; PMI_020080	S685:S688; S172:S175	RHG17_HUMAN_Rho_GTPase-activating_protein_17; XP_022102381.1 rho GTPase-activating protein 17-like isoform X1 [Acanthaster planci] (id=70.81%; len=185; e=3.97E-60)	SPKRIGSVDSEDI,RIGSVDSEDIPEE; SPKRIGSVDSEDI,RIGSVDSEDIPEE	2,3	2.655	0.6669	0.241185	1	3	3	2		S685:S688; S172:S175	0.0834302	0.131444	0.601455	0.668416	0.723551	1	0.995227	3.41239e-05	FC
Pmi_663150_PRR5L_RAT_Proline-rich_protein_5-like|m.29293	S308:S317	PRR5L_RAT_Proline-rich_protein_5-like	TSDILSSPIRDTP,RDTPTMSPREHSA	3	2.284	0.377	0.556591	0.98734	2	3	3	2	S308:S317	0.0639143	0.946671	0.58307	0.896141	0.70671	0.995367	0.990857	0.000125009	FC	0.653172	0.917991	0.759074	0.0510986	0.292366
PMI_008487; 36629|m.25431; Pmi_632161_DDI2_DANRE_Protein_DDI1_homolog_2|m.20952	S398:S403; S240:S245; S361:S366	XP_022092810.1 protein DDI1 homolog 2-like [Acanthaster planci] (id=80.16%; len=489; e=0.00E+00) ; XP_022092810.1 protein DDI1 homolog 2-like [Acanthaster planci] (id=90.27%; len=329; e=0.00E+00) ; DDI2_DANRE_Protein_DDI1_homolog_2	RLNRSESLENTSM,ESLENTSMESEDK; RLNRSESLENTSM,ESLENTSMESEDK; RLNRSESLENTSM,ESLENTSMESEDK	2,3,4	3.694	0.6519	0.01206	0.99852	6	7	4	2	S398:S403; S240:S245; S361:S366	0.0703812	0.329115	0.929095	0.852851	0.87599	0.966219	0.993272	6.77469e-05	FC	0.0431568	0.0921687	0.91985	0.103384	0.00323356
18142|m.12707; PMI_015438; PMI_021751; Pmi_649620_CDC7_HUMAN_Cell_division_cycle_7-related_protein_kinase|m.25187	S136; S254; S464; S464	BAI68101.1 cell division cycle 7 [Patiria pectinifera] (id=92.89%; len=239; e=2.46E-147) ; BAI68101.1 cell division cycle 7 [Patiria pectinifera] (id=96.38%; len=359; e=0.00E+00) ; BAI68101.1 cell division cycle 7 [Patiria pectinifera] (id=97.53%; len=567; e=0.00E+00) ; CDC7_HUMAN_Cell_division_cycle_7-related_protein_kinase	KGDAGFSPPSSKK; KGDAGFSPPSSKK; KGDAGFSPPSSKK; KGDAGFSPPSSKK	3	1.471	0.4521	0.0331	1	2	2	1		S136; S254; S464; S464	0.0732763	0.147937	0.377346	0.419116	0.515819	1	0.997018	1.33236e-05	FC
49719|m.33245	S377:S381	XP_022089430.1 tRNA-splicing endonuclease subunit Sen54-like [Acanthaster planci] (id=82.06%; len=708; e=0.00E+00)	ALYRLPSSEDSPT,LPSSEDSPTKCNP	2,3	2.042	0.5411	0.017644	0.99757	2	3	3		S377:S381	0.0687269	0.547019	0.953034	0.88764	0.847385	0.963103	0.960919	0.00226114	FC
Pmi_658390_FA13A_BOVIN_Protein_FAM13A|m.27757; PMI_000756; 78675|m.52764	S330; S330; S330	FA13A_BOVIN_Protein_FAM13A; XP_022080769.1 protein FAM13A-like isoform X1 [Acanthaster planci] (id=78.42%; len=1256; e=0.00E+00) ; XP_022080812.1 protein FAM13A-like isoform X2 [Acanthaster planci] (id=82.00%; len=1217; e=0.00E+00)	PAGGLLSPRDVSG; PAGGLLSPRDVSG; PAGGLLSPRDVSG	2,3	4.327	0.7546	0.534619	1	3	4	3		S330; S330; S330	0.0633302	0.209207	0.22257	0.782631	0.638206	1	0.998882	1.87384e-06	FC
PMI_016539	S201	XP_022102605.1 LOW QUALITY PROTEIN: prostamide/prostaglandin F synthase-like [Acanthaster planci] (id=73.66%; len=186; e=3.13E-79)	PVPSLESPKKAEE	2,3,4,5	3.09	0.7165	0.05771	1	15	14	17	2	S201	0.0620721	0.425708	0.825676	0.814695	0.659662	1	0.950245	0.00365182	FC	0.0597922	0.0925196	0.938382	0.120591	0.00208248
Pmi_566840_no_annot|m.11065; 14770|m.9704	T254; T254	no_annot; XP_022085969.1 aftiphilin-like isoform X4 [Acanthaster planci] (id=64.83%; len=273; e=1.06E-89)	VWSKAKTPELSHS; VWSKAKTPELSHS	3,4	3.314	0.6639	0.019012	1	2	2	3	2	T254; T254	0.0779787	0.485746	0.932964	0.889241	0.810822	0.996453	0.952922	0.00327232	FC	0.100323	0.133725	0.979166	0.169799	4.49495e-07
Pmi_511390_no_annot|m.6809; 43699|m.29414	S35; S35	no_annot; XP_022101532.1 uncharacterized protein LOC110985090 [Acanthaster planci] (id=45.03%; len=171; e=7.44E-26)	SCRSLVSPPPNEK; SCRSLVSPPPNEK	2,3	1.913	0.4619	0.052694	1	4	3	4	6	S35; S35	0.0789543	0.762927	0.905049	0.890968	0.775102	1	0.996623	1.70898e-05	FC	0.0678523	0.182025	0.948961	0.0446181	0.000649569
Pmi_611880_LARP7_HUMAN_La-related_protein_7|m.17032	S326	LARP7_HUMAN_La-related_protein_7	SRKRKHSGGDNAH	4	1.981	0.476	0.28432	1	1	1	1		S326	0.0848216	0.509674	0.88022	0.717706	0.70478	0.922155	0.864649	0.0262401	FC
PMI_016679; Pmi_615422_no_annot|m.17610; 22165|m.16827	S76:S81; S34:S39; S135:S140	XP_022085049.1 FK506-binding protein 15-like isoform X2 [Acanthaster planci] (id=55.24%; len=458; e=4.41E-72) ; no_annot; XP_022083111.1 nephrocystin-1-like isoform X1 [Acanthaster planci] (id=58.70%; len=46; e=1.20E-01)	VHQAKESPEKPSP,ESPEKPSPPVKEA; VHQAKESPEKPSP,ESPEKPSPPVKEA; VHQAKESPEKPSP,ESPEKPSPPVKEA	3,4	2.016	0.5231	0.036542	1	3	2	2		S76:S81; S34:S39; S135:S140	0.0692838	0.381241	0.937265	0.806887	0.751095	0.990482	0.983091	0.00042646	FC
PMI_008315	S390	XP_022109307.1 syndetin-like [Acanthaster planci] (id=84.09%; len=924; e=0.00E+00)	ANEDPISPMAKEQ	3,4	3.892	0.6601	0.980916	1	1	1	2		S390	0.0612684	0.209073	0.623003	0.729692	0.774696	1	0.989551	0.000163204	FC
PMI_030296; Pmi_590051_LAT1_HUMAN_Large_neutral_amino_acids_transporter_small_su..CUT|m.13766	S17; S17	XP_022094537.1 large neutral amino acids transporter small subunit 1-like [Acanthaster planci] (id=88.57%; len=175; e=3.51E-86) ; LAT1_HUMAN_Large_neutral_amino_acids_transporter_small_su..CUT	TDFAPASPGPDSK; TDFAPASPGPDSK	3,4	3.563	0.7073	0.089588	1	5	6	5	2	S17; S17	0.0554405	0.643989	0.898592	0.879689	0.808697	1	0.965923	0.00172212	FC	0.0775166	0.138792	0.968969	0.0839834	0.00026042
PMI_022561; PMI_019729; Pmi_521200_EHBP1_HUMAN_EH_domain-binding_protein_1|m.7411	S354:S358; S543:S547; S60:S64	XP_022081263.1 EH domain-binding protein 1-like isoform X4 [Acanthaster planci] (id=80.50%; len=677; e=0.00E+00) ; XP_022081263.1 EH domain-binding protein 1-like isoform X4 [Acanthaster planci] (id=82.41%; len=898; e=0.00E+00) ; EHBP1_HUMAN_EH_domain-binding_protein_1	KSHSRQSSVDSDL,RQSSVDSDLSPET; KSHSRQSSVDSDL,RQSSVDSDLSPET; KSHSRQSSVDSDL,RQSSVDSDLSPET	2,3	2.217	0.6513	0.351087	0.99752	1	1	2	1	S354:S358; S543:S547; S60:S64	0.0678532	0.168775	0.858989	0.781318	0.75393	1	0.92421	0.00839841	FC	0.135546	0.20634	0.971783	0.0184044	0.000305709
Pmi_572840_no_annot|m.11670; 27780|m.20490; PMI_003555; PMI_012889	T396; T124; T396; T177	no_annot; XP_022094817.1 uncharacterized protein LOC110981514 isoform X2 [Acanthaster planci] (id=67.86%; len=224; e=2.47E-105) ; XP_022094817.1 uncharacterized protein LOC110981514 isoform X2 [Acanthaster planci] (id=68.07%; len=498; e=0.00E+00) ; XP_022094817.1 uncharacterized protein LOC110981514 isoform X2 [Acanthaster planci] (id=60.87%; len=276; e=7.86E-113)	DASKPETPTKIDA; DASKPETPTKIDA; DASKPETPTKIDA; DASKPETPTKIDA	3,4,5	4.125	0.6336	0.088349	0.99999	1	2	2	1	T396; T124; T396; T177	0.0920283	0.263466	0.759902	0.777701	0.794909	1	0.986193	0.000284651	FC	0.103106	0.232272	0.964864	0.0176984	0.000436867
24769|m.18757; PMI_017059; Pmi_610530_CC149_XENLA_Coiled-coil_domain-containing_protein_149|m.16816	S277; S276; S305	XP_022096552.1 coiled-coil domain-containing protein 149-like [Acanthaster planci] (id=77.78%; len=675; e=0.00E+00) ; XP_022096552.1 coiled-coil domain-containing protein 149-like [Acanthaster planci] (id=70.33%; len=583; e=0.00E+00) ; CC149_XENLA_Coiled-coil_domain-containing_protein_149	SGGLLVSPKQVEQ; SGGLLVSPKQVEQ; SGGLLVSPKQVEQ	2,3	3.38	0.572	0.107886	1	2	1	2	2	S277; S276; S305	0.0513358	0.433987	0.779156	0.923353	0.752594	1	0.989696	0.000158718	FC	0.158076	0.214333	0.953996	0.114143	0.00270786
PMI_004635; PMI_018010; Pmi_613130_MON2_XENLA_Protein_MON2_homolog|m.17201	S203; S193; S296	XP_022081617.1 protein MON2 homolog isoform X3 [Acanthaster planci] (id=82.50%; len=583; e=0.00E+00) ; XP_022081614.1 protein MON2 homolog isoform X1 [Acanthaster planci] (id=88.59%; len=447; e=0.00E+00) ; MON2_XENLA_Protein_MON2_homolog	QGISAPSPPTSPE; QGISAPSPPTSPE; QGISAPSPPTSPE	3,4	3.585	0.696	0.182037	1	4	4	5	1	S203; S193; S296	0.0673248	0.482004	0.869057	0.875631	0.825805	1	0.942991	0.00478237	FC	0.0420202	0.0765421	0.908229	0.0401599	0.0045185
PMI_008052; PMI_001066; Pmi_585930_ADM1B_XENLA_Proteasomal_ubiquitin_receptor_ADRM1-B|m.13215	S133; S133; S133	XP_022101484.1 proteasomal ubiquitin receptor ADRM1-B-like isoform X2 [Acanthaster planci] (id=83.41%; len=422; e=0.00E+00) ; XP_022101484.1 proteasomal ubiquitin receptor ADRM1-B-like isoform X2 [Acanthaster planci] (id=85.31%; len=422; e=0.00E+00) ; ADM1B_XENLA_Proteasomal_ubiquitin_receptor_ADRM1-B	NPPAPGSSGGGGR; NPPAPGSSGGGGR; NPPAPGSSGGGGR	2,3,4	3.726	0.7373	0.253125	0.99751	8	8	9	6	S133; S133; S133	0.0830783	0.172577	0.606451	0.754842	0.846376	1	0.989005	0.000180682	FC	0.31977	0.379191	0.959719	0.00330234	0.000495617
PMI_011380; PMI_014969	S294:S296; S294:S296	XP_022088992.1 WD repeat-containing protein 47-like isoform X1 [Acanthaster planci] (id=88.65%; len=960; e=0.00E+00) ; XP_022088992.1 WD repeat-containing protein 47-like isoform X1 [Acanthaster planci] (id=88.55%; len=961; e=0.00E+00)	KQRGYPSPSPTTP,RGYPSPSPTTPIL; KQRGYPSPSPTTP,RGYPSPSPTTPIL	2,3	2.324	0.6022	0.060695	0.99999	2	3	2		S294:S296; S294:S296	0.0437208	0.110663	0.307511	0.41458	0.525379	1	0.992523	8.36548e-05	FC
Pmi_623200_TPC12_MOUSE_Trafficking_protein_particle_complex_subunit_12|m.19067; 51965|m.34541	S276; S32	TPC12_MOUSE_Trafficking_protein_particle_complex_subunit_12; XP_022092829.1 trafficking protein particle complex subunit 12-like [Acanthaster planci] (id=56.15%; len=130; e=7.41E-26)	SSNLPPSPTEGSS; SSNLPPSPTEGSS	3,4	3.376	0.6478	0.078644	0.99999	4	6	4	7	S276; S32	0.0731209	0.280729	0.795128	0.730327	0.76466	1	0.992584	8.22866e-05	FC	0.149346	0.222669	0.93744	0.0116555	0.000539975
PMI_005008	S221	XP_022099559.1 putative Ras-related protein Rab-33 [Acanthaster planci] (id=92.34%; len=235; e=5.21E-160)	TVRLPTSPGSQKK	2	1.381	0.4443	0.305358	0.99777	1	1	1		S221	0.0573254	0.313366	0.768029	0.810228	0.694469	1	0.998219	4.75738e-06	FC
15559|m.10348; Pmi_671260_ASPM_MOUSE_Abnormal_spindle-like_microcephaly-associated_p..CUT|m.32229	S167; S147	XP_022094618.1 abnormal spindle-like microcephaly-associated protein homolog [Acanthaster planci] (id=55.22%; len=201; e=1.46E-49) ; ASPM_MOUSE_Abnormal_spindle-like_microcephaly-associated_p..CUT	PKDKAESPPKKLK; PKDKAESPPKKLK	3	1.451	0.2576	0.137454	1	2	2	1		S167; S147	0.0644473	0.700173	0.956597	0.837027	0.816212	0.996626	0.934636	0.00626907	FC
PMI_029547	S433	XP_022101506.1 zinc finger protein 800-like [Acanthaster planci] (id=86.43%; len=855; e=0.00E+00)	NNNDSSSPPACDI	3	4.117	0.7705	0.052683	1	2	2	2	1	S433	0.0994862	0.401901	0.946231	0.836112	0.748753	0.968746	0.984725	0.00034822	FC	0.235705	0.263529	0.919543	0.369218	0.00357989
Pmi_634400_UBE3A_HUMAN_Ubiquitin-protein_ligase_E3A|m.21415; PMI_013285; 64836|m.43125	T27; T27; T27	UBE3A_HUMAN_Ubiquitin-protein_ligase_E3A; XP_022103087.1 ubiquitin-protein ligase E3A-like [Acanthaster planci] (id=84.58%; len=960; e=0.00E+00) ; XP_022103087.1 ubiquitin-protein ligase E3A-like [Acanthaster planci] (id=84.27%; len=960; e=0.00E+00)	TQRSPATSPDDMK; TQRSPATSPDDMK; TQRSPATSPDDMK	2	1.539	0.6849	0.133471	0.99684	4	2	1		T27; T27; T27	0.061198	0.404677	0.773527	0.804156	0.824444	1	0.979976	0.000597412	FC
PMI_005129; PMI_029686; Pmi_611960_SFSWA_HUMAN_Splicing_factor,_suppressor_of_white-apricot_homolog|m.17076; 37079|m.25675	S113; S45; S97; S96	XP_022101070.1 splicing factor, suppressor of white-apricot homolog isoform X1 [Acanthaster planci] (id=79.38%; len=97; e=1.06E-38) ; XP_022101071.1 splicing factor, suppressor of white-apricot homolog isoform X2 [Acanthaster planci] (id=73.56%; len=87; e=5.52E-30) ; SFSWA_HUMAN_Splicing_factor,_suppressor_of_white-apricot_homolog; XP_022101071.1 splicing factor, suppressor of white-apricot homol…	GRGHLPSLSEYED; WRGHLPSLSEYED; GRGHLPSLSEYED; GRGHLPSLSEYED	3	4.042	0.7335	0.12238	1	1	1	1		S113; S45; S97; S96	0.0952621	0.24483	0.895995	0.896067	0.859072	0.986374	0.949138	0.00381467	FC
77667|m.52100; 77666|m.52092; 77660|m.52074; 77652|m.52054; 77661|m.52082	S935; S846; S990; S901; S259	XP_022097945.1 vesicle-associated protein-like, partial [Acanthaster planci] (id=71.09%; len=640; e=0.00E+00) ; XP_022097945.1 vesicle-associated protein-like, partial [Acanthaster planci] (id=67.66%; len=535; e=6.52E-175) ; XP_022097945.1 vesicle-associated protein-like, partial [Acanthaster planci] (id=71.09%; len=640; e=0.00E+00) ; XP_022097945.1 vesicle-associated protein-like, partial [Acant…	GSLDVDSPEYEGK; GSLDVDSPEYEGK; GSLDVDSPEYEGK; GSLDVDSPEYEGK; GSLDVDSPEYEGK	2,3,4,5	6.381	0.7353	0.011574	1	17	22	16	22	S935; S846; S990; S901; S259	0.0693849	0.339968	0.884534	0.859475	0.965274	0.998415	0.991061	0.000119502	FC	0.0704239	0.129186	0.940218	0.0330064	0.00134938
Pmi_621370_SH3R3_MOUSE_SH3_domain-containing_RING_finger_protein_3|m.18735; 15872|m.10652	S127:S130; S102:S105	SH3R3_MOUSE_SH3_domain-containing_RING_finger_protein_3; XP_022099588.1 E3 ubiquitin-protein ligase SH3RF1-like isoform X3 [Acanthaster planci] (id=73.19%; len=138; e=1.61E-51)	ILQRVRSPSSPQP,RVRSPSSPQPGLQ; ILQRVRSPSSPQP,RVRSPSSPQPGLQ	4	3.067	0.6316	0.183993	0.99459	2	2	2	2	S127:S130; S102:S105	0.0563395	0.376425	0.825713	0.800361	0.917075	0.990188	0.981684	0.000500167	FC	0.274452	0.268339	0.949379	0.846677	0.000420178
38227|m.26276; 38232|m.26279; Pmi_627500_PNPO_MOUSE_Pyridoxine-5p-phosphate_oxidase|m.19956; PMI_001947; 38241|m.26283; 38242|m.26284; 38229|m.26277; 38238|m.26281	S81; S99; S26; S26; S99; S81; S26; S26	XP_022096786.1 pyridoxine-5'-phosphate oxidase-like isoform X2 [Acanthaster planci] (id=68.01%; len=297; e=3.80E-142) ; XP_022096786.1 pyridoxine-5'-phosphate oxidase-like isoform X2 [Acanthaster planci] (id=66.11%; len=301; e=1.20E-137) ; PNPO_MOUSE_Pyridoxine-5p-phosphate_oxidase; XP_022096786.1 pyridoxine-5'-phosphate oxidase-like isoform X2 [Acanthaster planci] (id=66.81%; len=241; e=9.37E-11…	YKEGHESFEEGDL; YKEGHESFEEGDL; YKEGHESFEEGDL; YKEGHESFEEGDL; YKEGHESFEEGDL; YKEGHESFEEGDL; YKEGHESFEEGDL; YKEGHESFEEGDL	2,3,4	3.695	0.629	0.123996	1	9	4	10	4	S81; S99; S26; S26; S99; S81; S26; S26	0.078523	0.157422	0.941221	0.905486	0.711792	0.978837	0.985391	0.000318564	FC	0.188922	0.210634	0.875103	0.43446	0.00799184
Pmi_554961_TBC25_HUMAN_TBC1_domain_family_member_25|m.9998; 88675|m.58584	S294; S115	TBC25_HUMAN_TBC1_domain_family_member_25; XP_022098594.1 TBC1 domain family member 25-like [Acanthaster planci] (id=71.60%; len=169; e=1.05E-61)	SANERQSPPSNLG; SANERQSPPSNLG	2,3,4	3.924	0.658	0.025709	1	7	7	7	9	S294; S115	0.0819924	0.653114	0.916764	0.903742	0.731562	1	0.986234	0.000282952	FC	0.0820252	0.139209	0.971816	0.0311024	0.000379939
PMI_017685; PMI_002531	T1127; T524	XP_022090237.1 vacuolar protein sorting-associated protein 13D-like isoform X1 [Acanthaster planci] (id=83.36%; len=1334; e=0.00E+00) ; XP_022090239.1 vacuolar protein sorting-associated protein 13D-like isoform X2 [Acanthaster planci] (id=88.36%; len=3584; e=0.00E+00)	EGGGVLTPLVERS; EGGGVLTPLVERS	2,3	2.659	0.2726	0.578394	1	1	3	3	2	T1127; T524	0.068902	0.429336	0.645468	0.767082	0.720453	1	0.99547	3.07373e-05	FC	0.375168	0.732964	0.937805	4.03489e-05	0.00327062
Pmi_623200_TPC12_MOUSE_Trafficking_protein_particle_complex_subunit_12|m.19067	S257	TPC12_MOUSE_Trafficking_protein_particle_complex_subunit_12	SEAPEASPQPQQK	3,4,5	5.659	0.7652	0.052646	1	7	5	7	6	S257	0.0675564	0.461873	0.906966	0.868846	0.825656	0.992161	0.990602	0.00013208	FC	0.0955968	0.142473	0.982224	0.0534322	6.04357e-05
PMI_017383	S108	XP_022092605.1 centrosomal protein of 131 kDa-like [Acanthaster planci] (id=77.04%; len=135; e=7.92E-44)	RHKRALSHNAQLS	2	1.426	0.6003	0.352973	1	1	1	1		S108	0.0892173	0.606885	0.694741	0.692159	0.81649	1	0.811898	0.049746	FC
PMI_020658; Pmi_582520_no_annot|m.12817	S93; S93	XP_022097411.1 ubiquitin-associated protein 1-like isoform X2 [Acanthaster planci] (id=72.80%; len=533; e=0.00E+00) ; no_annot	QRAAATSPVQLPN; QRAAATSPVQLPN	2,3	5.818	0.7599	0.158311	0.99822	2	1	2	4	S93; S93	0.0667098	0.624082	0.900648	0.827217	0.802041	1	0.97809	0.000714792	FC	0.0693486	0.147209	0.959328	0.0287789	0.00093805
Pmi_664653_ANR17_HUMAN_Ankyrin_repeat_domain-containing_protein_17|m.29730; 35353|m.24720	S855; S99	ANR17_HUMAN_Ankyrin_repeat_domain-containing_protein_17; XP_022091038.1 ankyrin repeat and KH domain-containing protein mask-like isoform X2 [Acanthaster planci] (id=85.15%; len=1199; e=0.00E+00)	KEALALSPDLPEQ; KEALALSPDLPEQ	2,3	3.141	0.6966	0.078026	1	6	9	9	8	S855; S99	0.0966963	0.767427	0.923678	0.897096	0.786296	1	0.988244	0.000206502	FC	0.123642	0.192397	0.951693	0.0683943	0.00162984
PMI_024209; PMI_019343; Pmi_632120_TCPG_BOVIN_T-complex_protein_1_subunit_gamma|m.20912; 64749|m.43081	S203; S293; S262; S201	XP_022105850.1 T-complex protein 1 subunit gamma-like [Acanthaster planci] (id=59.32%; len=381; e=2.56E-136) ; XP_022105850.1 T-complex protein 1 subunit gamma-like [Acanthaster planci] (id=66.27%; len=590; e=0.00E+00) ; TCPG_BOVIN_T-complex_protein_1_subunit_gamma; XP_022105850.1 T-complex protein 1 subunit gamma-like [Acanthaster planci] (id=94.05%; len=487; e=0.00E+00)	QTSLEISREEDFT; QTSLEISREEDFT; QTSLEISREEDFT; QTSLEISREEDFT	3	2.054	0.6424	0.132581	1	5	3	4	3	S203; S293; S262; S201	0.0628296	0.372728	0.938253	0.934677	0.856673	0.995051	0.987118	0.000247868	FC	0.0601934	0.132573	0.991189	0.000435289	5.66474e-08
48607|m.32502; Pmi_630101_GIT2_HUMAN_ARF_GTPase-activating_protein_GIT2|m.20504; PMI_000810	S48:S49; S454:S455; S369:S370	XP_022108828.1 ARF GTPase-activating protein GIT2-like isoform X2 [Acanthaster planci] (id=85.41%; len=377; e=0.00E+00) ; GIT2_HUMAN_ARF_GTPase-activating_protein_GIT2; XP_022108829.1 ARF GTPase-activating protein GIT2-like isoform X3 [Acanthaster planci] (id=81.59%; len=554; e=0.00E+00)	LKPRGGSSDASDE,KPRGGSSDASDEP; LKPRGGSSDASDE,KPRGGSSDASDEP; LKPRGGSSDASDE,KPRGGSSDASDEP	2,3	3.32	0.724	0.368748	1	2	2	3		S48:S49; S454:S455; S369:S370	0.0813911	0.128058	0.556008	0.644642	0.838189	1	0.995021	3.71272e-05	FC
Pmi_640091_ABCD4_MOUSE_ATP-binding_cassette_sub-family_D_member_4|m.22708	S383	ABCD4_MOUSE_ATP-binding_cassette_sub-family_D_member_4	TKANYGSPVQLPD	2,3,4,5	3.428	0.689	0.191558	1	3	2	2	1	S383	0.0861269	0.553833	0.869906	0.772787	0.756124	0.998647	0.912292	0.0112017	FC	0.101474	0.127387	0.93582	0.0382096	0.00140749
PMI_012240; PMI_017288; Pmi_647392_DYST_MOUSE_Dystonin|m.24611	T737; T294; T204	PIK50378.1 putative nesprin-1 [Apostichopus japonicus] (id=49.08%; len=1308; e=0.00E+00) ; XP_022102241.1 uncharacterized protein LOC110985497 isoform X1 [Acanthaster planci] (id=73.93%; len=675; e=0.00E+00) ; DYST_MOUSE_Dystonin	RSSLAITPKEGRY; RSSLAITPKEGRY; RSSLAITPKEGRY	2	1.585	0.407	0.029068	1	2	2	3	2	T737; T294; T204	0.0594917	0.323438	0.788926	0.66592	0.775894	1	0.981403	0.000515568	FC	0.141039	0.188196	0.971985	0.150185	8.34916e-06
Pmi_492011_FA89A_XENLA_Protein_FAM89A|m.5764	S6	FA89A_XENLA_Protein_FAM89A	-MAKAVSPTASAT	2,3	4.342	0.6964	0.218575	0.99999	3	3	2	2	S6	0.073916	0.688679	0.879886	0.905562	0.848137	1	0.975884	0.00086533	FC	0.141482	0.191262	0.954195	0.215007	0.000698875
45715|m.30629; Pmi_641782_HGNAT_MOUSE_Heparan-alpha-glucosaminide_N-acetyltransferase|m.23143	S237; S231	XP_022105998.1 heparan-alpha-glucosaminide N-acetyltransferase-like [Acanthaster planci] (id=79.28%; len=637; e=0.00E+00) ; HGNAT_MOUSE_Heparan-alpha-glucosaminide_N-acetyltransferase	VNSDLGSPPSRQP; VNSDLGSPPSRQP	2,3	1.903	0.5444	0.010815	1	2	2	3	3	S237; S231	0.050861	0.563094	0.962401	0.913668	0.741444	0.966241	0.98615	0.000286423	FC	0.0731811	0.118047	0.928616	0.000803848	0.00253428
Pmi_617420_PHF13_MOUSE_PHD_finger_protein_13|m.17994; PMI_000786	S103; S64	PHF13_MOUSE_PHD_finger_protein_13; XP_022094970.1 PHD finger protein 13-like isoform X1 [Acanthaster planci] (id=84.43%; len=167; e=4.59E-99)	GHVKKRSPSPLDS; GHVKKRSPSPLDS	3	2.039	0.4924	0.511178	0.99542	1	1	1		S103; S64	0.144879	0.314376	0.812663	0.870199	0.863643	0.966235	0.925283	0.00816537	FC
PMI_014411	S407:S413	XP_022079074.1 glutamine-dependent NAD(+) synthetase-like [Acanthaster planci] (id=68.90%; len=463; e=0.00E+00)	AAKSPESSPQDDS,SSPQDDSPKKRRT	2,3	1.943	0.5495	0.048387	0.99265	3	1	1		S407:S413	0.138204	0.21741	0.291226	0.362727	0.374281	1	0.964563	0.00186143	FC
Pmi_636190_ADIP_HUMAN_Afadin-_and_alpha-actinin-binding_protein|m.21834; PMI_006127; 20201|m.14746	S547; S624; S523	ADIP_HUMAN_Afadin-_and_alpha-actinin-binding_protein; XP_022087854.1 afadin- and alpha-actinin-binding protein A-like [Acanthaster planci] (id=72.66%; len=801; e=0.00E+00) ; XP_022087854.1 afadin- and alpha-actinin-binding protein A-like [Acanthaster planci] (id=85.83%; len=621; e=0.00E+00)	QQQLMLSPTGMQG; QQQLMLSPTGMQG; QQQLMLSPTGMQG	3,4,5	6.072	0.7531	0.162953	0.99998	6	4	5		S547; S624; S523	0.0587918	0.092163	0.0847447	0.474717	0.332982	1	0.983141	0.00042395	FC
Pmi_648520_PDE4D_MOUSE_cAMP-specific_3p,5p-cyclic_phosphodiesterase_4D|m.24877	S73:S80	PDE4D_MOUSE_cAMP-specific_3p,5p-cyclic_phosphodiesterase_4D	ESFLYRSDSDFDL,DSDFDLSPKSMSR	2,3	2.687	0.5778	0.477581	0.9966	1	3	2		S73:S80	0.101974	0.401825	0.754614	0.578272	0.606621	0.865338	0.91037	0.0116903	FC
Pmi_548310_ARH_HUMAN_Low_density_lipoprotein_receptor_adapter_protein_1|m.9454	S360	ARH_HUMAN_Low_density_lipoprotein_receptor_adapter_protein_1	FQLDYPSP-----	2	2.183	0.7705	0.105211	1	3	1	2		S360	0.0774505	0.613346	0.86065	0.79753	0.706904	1	0.966426	0.00167186	FC
79395|m.53291; 79389|m.53271; 79387|m.53264; 79391|m.53276; Pmi_646401_KTN1_HUMAN_Kinectin|m.24357; 79398|m.53301; 79386|m.53259	S1072; S1068; S1061; S1079; S848; S1035; S1028	XP_022105257.1 ribosome-binding protein 1-like isoform X4 [Acanthaster planci] (id=78.91%; len=1048; e=0.00E+00) ; XP_022105249.1 ribosome-binding protein 1-like isoform X3 [Acanthaster planci] (id=78.69%; len=1037; e=0.00E+00) ; XP_022105249.1 ribosome-binding protein 1-like isoform X3 [Acanthaster planci] (id=78.69%; len=1037; e=0.00E+00) ; XP_022105242.1 ribosome-binding protein 1-like isoform…	DQLRKASTSSQDI; DQLRKASTSSQDI; DQLRKASTSSQDI; DQLRKASTSSQDI; DQLRKASTSSQDI; DQLRKASTSSQDI; DQLRKASTSSQDI	3,4	5.029	0.7091	0.114883	1	4	1	2	5	S1072; S1068; S1061; S1079; S848; S1035; S1028	0.0756434	0.268699	0.792847	0.901534	0.904438	1	0.975363	0.000903002	FC	0.0861244	0.192924	0.971933	0.0178842	0.000348995
45077|m.30281; Pmi_668792_MIA3_BOVIN_Melanoma_inhibitory_activity_protein_3|m.31158; 45076|m.30277	S438; S438; S426	XP_022093121.1 basic proline-rich protein-like isoform X1 [Acanthaster planci] (id=83.13%; len=326; e=7.53E-164) ; MIA3_BOVIN_Melanoma_inhibitory_activity_protein_3; XP_022093122.1 basic proline-rich protein-like isoform X2 [Acanthaster planci] (id=83.44%; len=314; e=8.05E-159)	SRSGRDSGPHPPF; SRSGRDSGPHPPF; SRSGRDSGPHPPF	4	2.022	0.5129	0.24296	1	2	1	2		S438; S438; S426	0.0833542	0.392228	0.840004	0.790745	0.824595	1	0.908027	0.0122995	FC
PMI_003930	S249	XP_022108884.1 small G protein signaling modulator 1-like [Acanthaster planci] (id=87.75%; len=914; e=0.00E+00)	KLRRKTSPLSANQ	2,3,4	2.213	0.5545	0.192618	0.9986	2	2	2		S249	0.0741963	0.382844	0.9089	0.87708	0.795664	1	0.993082	7.1627e-05	FC
48525|m.32411; PMI_017276; Pmi_639951_PLIN2_PIG_Perilipin-2|m.22681	S235; S259; S235	XP_022108138.1 perilipin-2-like isoform X2 [Acanthaster planci] (id=78.74%; len=461; e=0.00E+00) ; XP_022108137.1 perilipin-2-like isoform X1 [Acanthaster planci] (id=71.84%; len=348; e=1.58E-177) ; PLIN2_PIG_Perilipin-2	TEMEKESPSSVQR; TEMEKESPSSVQR; TEMEKESPSSVQR	3	1.25	0.4927	0.079697	0.99998	1	1	1		S235; S259; S235	0.185008	0.424257	0.635893	0.723879	0.827781	1	0.933681	0.00645152	FC
15963|m.10722; Pmi_612280_SYT2_MOUSE_Synaptotagmin-2|m.17093	S72; S72	XP_022110705.1 synaptotagmin-1-like isoform X2 [Acanthaster planci] (id=64.06%; len=217; e=1.62E-86) ; SYT2_MOUSE_Synaptotagmin-2	YDEIGRSPLSGRF; YDEIGRSPLSGRF	2,3	2.272	0.6203	0.01935	1	4	1	3	1	S72; S72	0.0851086	0.44438	0.911887	0.80155	0.747851	1	0.97854	0.000685867	FC	0.0982051	0.145087	0.983699	0.0295194	3.56228e-05
PMI_008384	T312:S314	XP_022104697.1 unconventional myosin-IXa-like, partial [Acanthaster planci] (id=83.68%; len=827; e=0.00E+00)	DPFVSQTPSPRSP,FVSQTPSPRSPFP	2,3	4.122	0.7285	0.648767	1	2	2	4		T312:S314	0.0385683	0.178538	0.488405	0.546675	0.521948	1	0.984873	0.000341496	FC
Pmi_644283_CI085_RAT_Uncharacterized_protein_C9orf85_homolog|m.23832; 45064|m.30265	S180:S182; S180:S182	CI085_RAT_Uncharacterized_protein_C9orf85_homolog; XP_022101248.1 histone H1.0-like [Acanthaster planci] (id=67.44%; len=258; e=1.68E-97)	RSRLSKSHSPLRT,RLSKSHSPLRTPK; RSRLSKSHSPLRT,RLSKSHSPLRTPK	2,3,4	1.851	0.4605	0.043649	1	1	2	3	3	S180:S182; S180:S182	0.0699133	0.0799581	0.166816	0.513041	0.370246	1	0.969034	0.00142347	FC	0.824831	0.701052	0.224276	0.543898	0.0686909
74301|m.49642; PMI_009936; PMI_009469	T92:T99:S102; T399:T406:S409; T207:T214:S217	XP_022103384.1 protein LSM14 homolog A-like isoform X2 [Acanthaster planci] (id=81.14%; len=228; e=3.36E-93) ; XP_022103383.1 protein LSM14 homolog A-like isoform X1 [Acanthaster planci] (id=64.07%; len=540; e=0.00E+00) ; XP_022103383.1 protein LSM14 homolog A-like isoform X1 [Acanthaster planci] (id=70.33%; len=364; e=6.63E-140)	GDVVKGTEDSGNE,EDSGNETQPSDAP,GNETQPSDAPEEE; GDVVKGTEDSGNE,EDSGNETQPSDAP,GNETQPSDAPEEE; GDVVKGTEDSGNE,EDSGNETQPSDAP,GNETQPSDAPEEE	4	4.502	0.5224	0.034328	0.99423	2	3	2		T92:T99:S102; T399:T406:S409; T207:T214:S217	0.101055	0.266542	0.830619	0.787688	0.854771	1	0.879048	0.0210593	FC
Pmi_2526140_no_annot|m.32529; PMI_005020; PMI_006555	S31; S1061; S972	no_annot; XP_022084310.1 kinesin-like protein KIF14 isoform X1 [Acanthaster planci] (id=86.62%; len=792; e=0.00E+00) ; XP_022084311.1 kinesin-like protein KIF14 isoform X2 [Acanthaster planci] (id=81.08%; len=1263; e=0.00E+00)	KDYKIDSPMTPLK; KDYKIDSPMTPLK; KDYKIDSPMTPLK	3	1.732	0.6009	1.16124	1	1	1	1		S31; S1061; S972	0.0725216	0.257298	0.226309	0.50262	0.684906	1	0.973036	0.00108077	FC
PMI_001195; PMI_020329; Pmi_604880_SNX16_HUMAN_Sorting_nexin-16|m.15886	S254; S254; S170	XP_022091928.1 sorting nexin-16-like isoform X2 [Acanthaster planci] (id=63.68%; len=413; e=1.93E-160) ; XP_022091928.1 sorting nexin-16-like isoform X2 [Acanthaster planci] (id=63.44%; len=413; e=2.93E-158) ; SNX16_HUMAN_Sorting_nexin-16	SRALCESLDETVY; SRALCESLDETVY; SRALCESLDETVY	2,3	2.981	0.6813	0.115275	1	1	2	1		S254; S254; S170	0.113225	0.57921	0.878088	0.559134	0.801137	0.962422	0.854568	0.0301879	FC
78182|m.52452; Pmi_655250_DBF4A_CRIGR_Protein_DBF4_homolog_A|m.26753	S1110:T1113; S1108:T1111	XP_022099857.1 uncharacterized protein LOC110984220 isoform X1 [Acanthaster planci] (id=61.29%; len=1426; e=0.00E+00) ; DBF4A_CRIGR_Protein_DBF4_homolog_A	KYKLVFSPETPKE,LVFSPETPKEERE; KYKLVFSPETPKE,LVFSPETPKEERE	3	1.428	0.3815	0.324575	1	1	1	1		S1110:T1113; S1108:T1111	0.0819524	0.206483	0.332958	0.348511	0.521573	1	0.997267	1.11938e-05	FC
PMI_015023; 71299|m.47652; Pmi_663090_CIP2A_HUMAN_Protein_CIP2A|m.29277	S553; S28; S589	XP_022093983.1 protein CIP2A homolog isoform X2 [Acanthaster planci] (id=80.83%; len=751; e=0.00E+00) ; XP_022093982.1 protein CIP2A homolog isoform X1 [Acanthaster planci] (id=87.43%; len=350; e=0.00E+00) ; CIP2A_HUMAN_Protein_CIP2A	GTHAILSPRRPQP; GTHAILSPRRPQL; GTHAILSPRRPQP	3,4	1.917	0.6208	0.037587	1	3	6	4		S553; S28; S589	0.103972	0.775758	0.905502	0.82582	0.869219	0.970057	0.961885	0.0021514	FC
Pmi_668151_TDRD1_ORYLA_Tudor_domain-containing_protein_1|m.30969; 15828|m.10616; PMI_021786; PMI_019747	S859; S136; S269; S129	TDRD1_ORYLA_Tudor_domain-containing_protein_1; XP_022086656.1 uncharacterized protein LOC110977121 isoform X3 [Acanthaster planci] (id=62.91%; len=213; e=8.49E-77) ; XP_022086656.1 uncharacterized protein LOC110977121 isoform X3 [Acanthaster planci] (id=58.37%; len=920; e=0.00E+00) ; XP_022086654.1 uncharacterized protein LOC110977121 isoform X1 [Acanthaster planci] (id=62.96%; len=1385; e=0.00E+…	TKQPRKSTELLHG; TKQPRKSTELLHG; TKHPRKSTELLHG; TKQPRKSTELLHG	2,3	3.872	0.7192	0.006129	1	3	2	3	1	S859; S136; S269; S129	0.0792121	0.331224	0.811413	0.81204	0.965643	0.999695	0.9663	0.00168442	FC	0.0710381	0.150898	0.9597	0.0131517	0.000958803
53459|m.35501; Pmi_659952_no_annot|m.28246	S1133; S1600	XP_022100191.1 uncharacterized protein LOC110984363 isoform X2 [Acanthaster planci] (id=59.86%; len=1328; e=0.00E+00) ; no_annot	EREATLSPVKSNT; EREATLSPVKSNT	2,3,4	5.368	0.6605	0.002281	1	7	13	8	5	S1133; S1600	0.0729281	0.789827	0.87633	0.82276	0.721336	1	0.991344	0.000112061	FC	0.0800038	0.175891	0.963141	0.0233777	0.000881163
PMI_013750; Pmi_567220_HD_HUMAN_Huntingtin|m.11111; 10630|m.6518	S498; S522; S522	XP_022080674.1 huntingtin-like isoform X2 [Acanthaster planci] (id=84.23%; len=1275; e=0.00E+00) ; HD_HUMAN_Huntingtin; XP_022080674.1 huntingtin-like isoform X2 [Acanthaster planci] (id=86.16%; len=1033; e=0.00E+00)	DSSAKNSPTSEVK; DSSAKNSPTSEVK; DSSAKNSPTSEVK	3,4,5	3.469	0.5898	0.006172	0.99304	4	2	5	1	S498; S522; S522	0.0633431	0.408794	0.788519	0.849803	0.770996	1	0.984945	0.000338273	FC	0.0963842	0.125322	0.974328	0.0400805	1.8954e-05
15678|m.10461; Pmi_629840_NU153_RAT_Nuclear_pore_complex_protein_Nup153|m.20449; PMI_017793	T177; T580; T955	XP_022090395.1 LOW QUALITY PROTEIN: nuclear pore complex protein Nup153-like [Acanthaster planci] (id=65.85%; len=205; e=2.47E-75) ; NU153_RAT_Nuclear_pore_complex_protein_Nup153; XP_022090395.1 LOW QUALITY PROTEIN: nuclear pore complex protein Nup153-like [Acanthaster planci] (id=64.91%; len=1636; e=0.00E+00)	FGSQSTTPSSGAK; FGSQSTTPSSGAK; FGSQSTTPSSGAK	2,3	3.15	0.6608	0.052775	1	2	2	3	4	T177; T580; T955	0.0819334	0.909592	0.534855	0.512361	0.643036	1	0.994523	4.49135e-05	FC	0.232907	0.38611	0.940401	0.0352649	0.00224262
PMI_022185; 12362|m.7798	S141; S211	XP_022104396.1 mitogen-activated protein kinase kinase kinase 2-like isoform X2 [Acanthaster planci] (id=79.94%; len=618; e=0.00E+00) ; XP_022104389.1 mitogen-activated protein kinase kinase kinase 2-like isoform X1 [Acanthaster planci] (id=83.03%; len=277; e=8.81E-145)	PARDTPSPPPGHI; PARDTPSPPPGHI	3	3.206	0.6582	0.004182	0.99999	4	5	6	1	S141; S211	0.104922	0.466986	0.859336	0.770234	0.916075	0.93921	0.874886	0.0225012	FC	0.22805	0.232577	0.937682	0.903726	0.000124475
48335|m.32304; Pmi_533790_TSC2_HUMAN_Tuberin|m.8333	S1134:T1142; S1134:T1142	XP_022103490.1 tuberin-like [Acanthaster planci] (id=76.58%; len=2007; e=0.00E+00) ; TSC2_HUMAN_Tuberin	PTDKSKSFEYNAP,EYNAPPTPEKSVS; PTDKSKSFEYNAP,EYNAPPTPEKSVS	3	2.747	0.4937	0.777833	0.99817	2	1	1		S1134:T1142; S1134:T1142	0.0576342	0.227488	0.891509	0.803792	0.745966	0.952462	0.9689	0.00143574	FC
Pmi_638990_CL004_PONAB_Uncharacterized_protein_C12orf4_homolog|m.22465; PMI_006280	S185; S185	CL004_PONAB_Uncharacterized_protein_C12orf4_homolog; XP_022106145.1 nascent polypeptide-associated complex subunit alpha-like [Acanthaster planci] (id=88.78%; len=205; e=1.36E-115)	VQQANVSRSKAVK; VQQANVSRSKAVK	2,3	3.556	0.6568	0.373399	1	1	2	2		S185; S185	0.0808623	0.349899	0.935293	0.955409	0.74126	1	0.993878	5.60979e-05	FC
PMI_010826; PMI_009333	S147; S179	XP_022102981.1 ubiquitin carboxyl-terminal hydrolase 37-like [Acanthaster planci] (id=49.59%; len=724; e=0.00E+00) ; XP_022102981.1 ubiquitin carboxyl-terminal hydrolase 37-like [Acanthaster planci] (id=68.75%; len=1165; e=0.00E+00)	PTTGRISPNPMFT; PTTGRISPNPMFT	3	3.87	0.6654	0.849326	1	2	1	1		S147; S179	0.0867978	0.648131	0.499823	0.774561	0.843281	0.999669	0.831852	0.0400338	FC
82925|m.55641; 82924|m.55639; PMI_010695; Pmi_669821_C19L2_DANRE_CWF19-like_protein_2|m.31614	S200; S200; S200; S24	XP_022098964.1 centrosomal protein of 44 kDa-like isoform X1 [Acanthaster planci] (id=70.81%; len=596; e=0.00E+00) ; XP_022098964.1 centrosomal protein of 44 kDa-like isoform X1 [Acanthaster planci] (id=71.21%; len=594; e=0.00E+00) ; XP_022098964.1 centrosomal protein of 44 kDa-like isoform X1 [Acanthaster planci] (id=71.31%; len=596; e=0.00E+00) ; C19L2_DANRE_CWF19-like_protein_2	YHTAETSPTIKTP; YHTAETSPTIKTP; YHTAETSPTIKTP; YHTAETSPTIKTP	2,3,4,5	5.471	0.7282	0.002721	1	28	29	32	23	S200; S200; S200; S24	0.0881261	0.462636	0.768376	0.712442	0.817731	0.999603	0.853067	0.0307977	FC	0.268693	0.276795	0.952058	0.782482	0.000192972
Pmi_637480_UBXN4_CAEEL_UBX_domain-containing_protein_4|m.22174; PMI_004950	S328; S308	UBXN4_CAEEL_UBX_domain-containing_protein_4; XP_022096930.1 transient receptor potential cation channel subfamily M member 2-like isoform X2 [Acanthaster planci] (id=63.38%; len=1155; e=0.00E+00)	QSLPAASPDREIQ; QSLPAASPDREIQ	3	4.819	0.7612	0.37966	1	1	1	1		S328; S308	0.134292	0.693707	0.702382	0.712832	0.674254	1	0.892635	0.0166721	FC
18081|m.12640; PMI_014931; PMI_019835	S48; S35; S24	XP_022103777.1 calcineurin subunit B type 2 [Acanthaster planci] (id=99.41%; len=170; e=5.95E-119) ; XP_022103777.1 calcineurin subunit B type 2 [Acanthaster planci] (id=85.29%; len=170; e=9.36E-96) ; XP_022103777.1 calcineurin subunit B type 2 [Acanthaster planci] (id=98.09%; len=157; e=9.37E-107)	KLDLDNSGALSVD; KLDLDNSGALSVD; KLDLDNSGALSVD	4,5	5.856	0.7005	0.077834	1	5	4	2		S48; S35; S24	0.0819746	0.549932	0.923121	0.901583	0.836688	0.964198	0.962247	0.00211104	FC
Pmi_590350_no_annot|m.13820; 83516|m.56050; PMI_000834; 83511|m.56047	S177; S177; S177; S177	no_annot; XP_022093367.1 uncharacterized protein LOC110980732 isoform X2 [Acanthaster planci] (id=80.91%; len=398; e=0.00E+00) ; XP_022093367.1 uncharacterized protein LOC110980732 isoform X2 [Acanthaster planci] (id=78.90%; len=365; e=0.00E+00) ; XP_022093367.1 uncharacterized protein LOC110980732 isoform X2 [Acanthaster planci] (id=74.11%; len=282; e=5.55E-138)	DGVKRESLDSGET; DGVKRESLDSGET; DGVKRESLDSGET; DGVKRESLDSGET	2,3,4	2.787	0.6203	0.106375	1	4	1	1	2	S177; S177; S177; S177	0.0886005	0.443817	0.829988	0.83277	0.832902	1	0.979924	0.000600537	FC	0.0785251	0.123957	0.981665	0.0418694	0.000169135
PMI_019316; 15530|m.10333	S323:S329; S356:S362	XP_022105079.1 uncharacterized protein LOC110987010 [Acanthaster planci] (id=68.61%; len=1287; e=0.00E+00) ; XP_022105079.1 uncharacterized protein LOC110987010 [Acanthaster planci] (id=69.13%; len=554; e=0.00E+00)	AALIPKSPPVPDS,SPPVPDSPPFKSL; AALIPKSPPVPDS,SPPVPDSPPFKSL	2,3	1.904	0.5499	0.008187	1	6	6	7	2	S323:S329; S356:S362	0.0667641	0.389413	0.890469	0.778916	0.723358	1	0.991206	0.000115672	FC	0.239146	0.273279	0.922044	0.492583	0.00109605
Pmi_651322_RSU1_HUMAN_Ras_suppressor_protein_1|m.25661	S195	RSU1_HUMAN_Ras_suppressor_protein_1	HNKVETSPDDLKI	2,4	3.69	0.6694	0.169571	1	2	1	2		S195	0.0732472	0.257403	0.706961	0.79766	0.710192	1	0.985878	0.000297752	FC
65688|m.43683; 65684|m.43678; PMI_015428; PMI_013630	S26; S26; S266; S763	XP_022106511.1 bromodomain adjacent to zinc finger domain protein 2B-like isoform X3 [Acanthaster planci] (id=82.28%; len=965; e=0.00E+00) ; XP_022106517.1 bromodomain adjacent to zinc finger domain protein 2B-like isoform X9 [Acanthaster planci] (id=82.48%; len=976; e=0.00E+00) ; XP_022106517.1 bromodomain adjacent to zinc finger domain protein 2B-like isoform X9 [Acanthaster planci] (id=78.99%;…	RNRFENSEDTDTS; RNRFENSEDTDTS; RNRFENSEDTDTS; RNRFENSEDTDTS	2,3	3.204	0.6582	0.035788	1	3	2	3	1	S26; S26; S266; S763	0.0758001	0.170408	0.213057	0.616715	0.446336	1	0.96198	0.0021408	FC	0.96323	0.584643	0.152404	0.000572358	0.000328185
PMI_019549; Pmi_643670_PARN_HUMAN_Poly(A)-specific_ribonuclease_PARN|m.23637; PMI_008611; 54598|m.36263	S224; S224; S254; S224	XP_022101867.1 poly(A)-specific ribonuclease PARN-like [Acanthaster planci] (id=83.28%; len=311; e=0.00E+00) ; PARN_HUMAN_Poly(A)-specific_ribonuclease_PARN; XP_022101867.1 poly(A)-specific ribonuclease PARN-like [Acanthaster planci] (id=79.48%; len=658; e=0.00E+00) ; XP_022101867.1 poly(A)-specific ribonuclease PARN-like [Acanthaster planci] (id=80.12%; len=664; e=0.00E+00)	VKARHESGLMLTT; VKARHESGLMLTT; VKARHESGLMLTT; VKARHESGLMLTT	3	2.868	0.6269	0.031939	1	4	4	5		S224; S224; S254; S224	0.0709291	0.0828263	0.344114	0.439944	0.828973	1	0.997714	7.83076e-06	FC
4229|m.2325; PMI_026980	S171; S737	XP_022093589.1 MKL/myocardin-like protein 1 isoform X2 [Acanthaster planci] (id=79.81%; len=208; e=1.31E-91) ; XP_022093588.1 MKL/myocardin-like protein 1 isoform X1 [Acanthaster planci] (id=84.82%; len=988; e=0.00E+00)	AASLPSSPTERNV; AASLPSSPTERNV	2	2.374	0.5533	0.007286	0.99799	2	3	2	3	S171; S737	0.0886313	0.796127	0.89275	0.884522	0.720941	1	0.996691	1.6409e-05	FC	0.306377	0.423879	0.954179	0.0121364	0.000406521
Pmi_559390_K0528_MOUSE_Uncharacterized_protein_KIAA0528|m.10381	S99:S104	K0528_MOUSE_Uncharacterized_protein_KIAA0528	RTNPLTSPLSTSP,TSPLSTSPPQDQL	3,4	4.677	0.2747	0.104098	0.99998	1	1	1	2	S99:S104	0.0792887	0.185858	0.840961	0.69113	0.74143	1	0.935098	0.00618171	FC	0.0446898	0.0886312	0.936645	0.0840679	0.00164193
PMI_019497; Pmi_544150_VW5B1_HUMAN_von_Willebrand_factor_A_domain-containing_protein_5B1|m.9106	S554; S486	XP_022090006.1 von Willebrand factor A domain-containing protein 5B1-like [Acanthaster planci] (id=92.64%; len=625; e=0.00E+00) ; VW5B1_HUMAN_von_Willebrand_factor_A_domain-containing_protein_5B1	GSKRLGSDDSVGE; GSKRLGSDDSVGE	2,3	4.136	0.6448	0.028328	1	7	3	5	7	S554; S486	0.0716166	0.311334	0.906332	0.928624	0.785435	0.93551	0.969771	0.00135687	FC	0.139393	0.312962	0.964901	0.000544804	0.000632964
PMI_023327; PMI_025478; Pmi_655720_ILKAP_HUMAN_Integrin-linked_kinase-associated_serine/thre..CUT|m.26924	S55; S55; S55	XP_022090343.1 integrin-linked kinase-associated serine/threonine phosphatase 2C-like isoform X1 [Acanthaster planci] (id=78.63%; len=365; e=0.00E+00) ; XP_022090343.1 integrin-linked kinase-associated serine/threonine phosphatase 2C-like isoform X1 [Acanthaster planci] (id=79.73%; len=365; e=0.00E+00) ; ILKAP_HUMAN_Integrin-linked_kinase-associated_serine/thre..CUT	QLKRRVSLDSGFY; DLKRRVSLDSGFY; DLKRRVSLDSGFY	2	2.111	0.4988	0.126877	1	3	3	1	3	S55; S55; S55	0.105768	0.388683	0.888418	0.726078	0.741561	0.969133	0.929444	0.00729165	FC	0.133898	0.328168	0.924031	0.000551287	0.00176399
PMI_003766; Pmi_548810_SPG17_MOUSE_Sperm-associated_antigen_17|m.9484	S879; S306	XP_022082065.1 sperm-associated antigen 17-like isoform X1 [Acanthaster planci] (id=84.34%; len=2478; e=0.00E+00) ; SPG17_MOUSE_Sperm-associated_antigen_17	AAATTPSPSASRP; AAATTPSPSASRP	2,3	1.872	0.6245	0.066023	0.99668	1	2	1	1	S879; S306	0.0723467	0.929837	0.965083	0.928739	0.786321	1	0.993606	6.119e-05	FC	0.122423	0.228048	0.962581	0.000173813	0.000374496
Pmi_318320_HMCS1_CHICK_Hydroxymethylglutaryl-CoA_synthase,_cytoplasmic|m.1488	S82:S92	HMCS1_CHICK_Hydroxymethylglutaryl-CoA_synthase,_cytoplasmic	PLSDLPSPMVDSA,DSAPVSSPIESLK	3,4	4.024	0.4434	0.103054	0.99997	4	1	4		S82:S92	0.0555457	0.18516	0.792911	0.818517	0.890484	0.97613	0.987625	0.000228752	FC
PMI_013744	T793	XP_022087184.1 epidermal growth factor receptor substrate 15-like 1 isoform X1 [Acanthaster planci] (id=72.10%; len=1043; e=0.00E+00)	PFNSKTTPDPFKD	2,3,4	2.16	0.5893	0.269249	0.99776	2	4	4	1	T793	0.0589409	0.208934	0.795617	0.821944	0.867314	0.921692	0.927909	0.00760837	FC	0.0156036	0.0816016	0.983801	0.00424026	1.32833e-05
18979|m.13506; PMI_015925; Pmi_669840_SRBS2_RAT_Sorbin_and_SH3_domain-containing_protein_2|m.31746	S134; S288; S145	XP_022081541.1 uncharacterized protein LOC110973912 isoform X9 [Acanthaster planci] (id=70.18%; len=218; e=2.06E-81) ; XP_022081541.1 uncharacterized protein LOC110973912 isoform X9 [Acanthaster planci] (id=68.14%; len=587; e=0.00E+00) ; SRBS2_RAT_Sorbin_and_SH3_domain-containing_protein_2	LAKDTDSPEEPPP; LAKDTDSPEEPPP; LAKDTDSPEEPPP	2,3	3.344	0.7022	0.069753	1	3	1	2	4	S134; S288; S145	0.104738	0.465401	0.848392	0.837182	0.790578	0.966667	0.971302	0.00122354	FC	0.259202	0.29151	0.944802	0.218989	0.00110213
Pmi_661270_KI67_HUMAN_Antigen_KI-67|m.29501; 68310|m.45570	S1500; S83	KI67_HUMAN_Antigen_KI-67; XP_022080667.1 nascent polypeptide-associated complex subunit alpha, muscle-specific form-like [Acanthaster planci] (id=76.69%; len=133; e=1.66E-48)	VVSVEPSPKKTRG; VVSVEPSPKKTRG	2,3,4	4.339	0.7776	0.050708	1	6	9	8	1	S1500; S83	0.0784918	0.336357	0.434464	0.652864	0.55844	1	0.982839	0.000439229	FC	0.667338	0.825796	0.965002	0.00303394	0.000402892
PMI_014969	T507	XP_022088992.1 WD repeat-containing protein 47-like isoform X1 [Acanthaster planci] (id=88.55%; len=961; e=0.00E+00)	ANVLSSTPKTNRF	3	3.714	0.6255	0.013251	0.99865	1	1	1		T507	0.0614518	0.643593	0.435527	0.698209	0.678833	1	0.811587	0.0499051	FC
Pmi_607900_INT10_MOUSE_Integrator_complex_subunit_10|m.16377	S252	INT10_MOUSE_Integrator_complex_subunit_10	PVTPLMSPQAGKG	2,3	3.044	0.6482	0.011873	1	6	5	6	5	S252	0.0854311	0.408426	0.692653	0.706141	0.694438	1	0.989889	0.000152833	FC	0.19311	0.35021	0.983648	0.00290993	2.45032e-05
PMI_013012	S83	XP_022083005.1 ral GTPase-activating protein subunit alpha-1-like isoform X2 [Acanthaster planci] (id=81.94%; len=1678; e=0.00E+00)	CQPLLPSPTTLKS	3,4	5.045	0.7481	0.443183	0.99709	1	1	1	2	S83	0.0823376	0.918228	0.91255	0.860656	0.736869	0.974311	0.981862	0.000490472	FC	0.0987071	0.20848	0.95057	0.00979183	0.00164625
PMI_019931; PMI_025502	S19; S19	XP_022089049.1 adipocyte plasma membrane-associated protein-like [Acanthaster planci] (id=78.34%; len=397; e=0.00E+00) ; XP_022089049.1 adipocyte plasma membrane-associated protein-like [Acanthaster planci] (id=79.78%; len=361; e=0.00E+00)	RKVKSPSSSPGVE; RKVKSPSSSPGVE	2,3	3.417	0.7139	0.101883	0.99814	2	2	1	1	S19; S19	0.0779167	0.359336	0.77387	0.823461	0.898024	1	0.990433	0.000136861	FC	0.294057	0.373663	0.930357	0.100729	0.000674697
66688|m.44459; 66687|m.44458	T155:S158; T155:S158	XP_022083361.1 transport and Golgi organization protein 11-like [Acanthaster planci] (id=81.14%; len=228; e=4.69E-138) ; XP_022083361.1 transport and Golgi organization protein 11-like [Acanthaster planci] (id=81.58%; len=228; e=8.12E-139)	TNGLDDTPTSPPK,LDDTPTSPPKLLS; TNGLDDTPTSPPK,LDDTPTSPPKLLS	3	2.438	0.6228	0.042402	0.99717	1	1	1		T155:S158; T155:S158	0.0525114	0.29268	0.705688	0.703507	0.693289	1	0.97282	0.00109811	FC
Pmi_668021_BAZ1B_HUMAN_Tyrosine-protein_kinase_BAZ1B|m.30901; 80695|m.54241; 80694|m.54238; 80699|m.54252; 80697|m.54247; 80698|m.54249	T485; T471; T471; T91; T91; T485	BAZ1B_HUMAN_Tyrosine-protein_kinase_BAZ1B; XP_022095000.1 tyrosine-protein kinase BAZ1B-like isoform X5 [Acanthaster planci] (id=79.21%; len=991; e=0.00E+00) ; XP_022095000.1 tyrosine-protein kinase BAZ1B-like isoform X5 [Acanthaster planci] (id=79.52%; len=991; e=0.00E+00) ; XP_022094995.1 tyrosine-protein kinase BAZ1B-like isoform X1 [Acanthaster planci] (id=80.32%; len=442; e=0.00E+00) ; XP_02…	EDEFKVTPKKTPS; EDEFKVTPKKTPS; EDEFKVTPKKTPS; EDEFKVTPKKTPS; EDEFKVTPKKTPS; EDEFKVTPKKTPS	3,4	4.638	0.655	0.006926	1	5	2	3	2	T485; T471; T471; T91; T91; T485	0.0648316	0.258578	0.268373	0.368381	0.482919	1	0.99203	9.50244e-05	FC	0.349849	0.854258	0.440552	0.0235788	0.0666946
Pmi_653111_TACC3_XENLA_Transforming_acidic_coiled-coil-containing_pr..CUT|m.26159; 60941|m.40375	S446:S453; S446:S453	TACC3_XENLA_Transforming_acidic_coiled-coil-containing_pr..CUT; XP_022091717.1 transforming acidic coiled-coil-containing protein 3-like isoform X7 [Acanthaster planci] (id=74.87%; len=951; e=0.00E+00)	VSKSNDSLTAEGD,LTAEGDSGDGLTA; VSKSNDSLTAEGD,LTAEGDSGDGLTA	3	3.68	0.5894	0.325939	0.99997	1	2	2		S446:S453; S446:S453	0.0675643	0.548406	0.752141	0.844081	0.794018	1	0.964325	0.00188638	FC
PMI_006156; PMI_008941	S893; S937	XP_022105952.1 ubiquitin carboxyl-terminal hydrolase 47-like isoform X2 [Acanthaster planci] (id=81.12%; len=1398; e=0.00E+00) ; XP_022105954.1 ubiquitin carboxyl-terminal hydrolase 47-like isoform X3 [Acanthaster planci] (id=80.72%; len=1452; e=0.00E+00)	AVDGDASPAIPTR; AVDGDASPAIPTR	2,3	4.096	0.7942	0.055525	1	5	4	4		S893; S937	0.0943047	0.577422	0.963386	0.904386	0.831859	0.99747	0.996478	1.85809e-05	FC
PMI_013596	S72	XP_022110704.1 synaptotagmin-1-like isoform X1 [Acanthaster planci] (id=78.60%; len=542; e=0.00E+00)	YDEIGRSPLSRRF	2,3	2.444	0.6196	0.048652	1	4	3	3	2	S72	0.0861141	0.412876	0.906902	0.735711	0.742334	1	0.954923	0.00300212	FC	0.212803	0.250492	0.955393	0.00537684	0.00120779
PMI_017685	S1139	XP_022090237.1 vacuolar protein sorting-associated protein 13D-like isoform X1 [Acanthaster planci] (id=83.36%; len=1334; e=0.00E+00)	SRTPGFSFSDGDS	2,3	3.535	0.6373	0.005863	1	5	4	4	1	S1139	0.0651751	0.400864	0.550191	0.897951	0.757724	0.990052	0.980617	0.000559908	FC	0.297796	0.796369	0.974851	0.000555702	3.99252e-05
PMI_016875	S400	XP_022086751.1 uncharacterized protein LOC110977152 isoform X1 [Acanthaster planci] (id=56.11%; len=1285; e=0.00E+00)	GYTQLKSPTDKNS	3,4	3.16	0.6383	0.034726	0.99998	2	4	2		S400	0.0732953	0.569681	0.867132	0.763016	0.82361	0.977729	0.917757	0.00986781	FC
55076|m.36567; Pmi_653481_UBP54_MOUSE_Inactive_ubiquitin_carboxyl-terminal_hydrolase_54|m.26249; 55075|m.36565	S379; S379; S379	XP_022086751.1 uncharacterized protein LOC110977152 isoform X1 [Acanthaster planci] (id=73.60%; len=625; e=0.00E+00) ; UBP54_MOUSE_Inactive_ubiquitin_carboxyl-terminal_hydrolase_54; XP_022086751.1 uncharacterized protein LOC110977152 isoform X1 [Acanthaster planci] (id=65.34%; len=1027; e=0.00E+00)	GYTQLKSPTDKHS; GYTQLKSPTDKHS; GYTQLKSPTDKHS	3,4	3.16	0.6383	0.034726	0.99998	1	2	2		S379; S379; S379	0.0853262	0.579879	0.914194	0.839689	0.729055	0.990818	0.903867	0.0134181	FC
Pmi_639991_NEB2_HUMAN_Neurabin-2|m.22686	S529	NEB2_HUMAN_Neurabin-2	AILMDDSPEASII	2,3	3.945	0.7193	0.0927	1	4	4	4	9	S529	0.115977	0.412754	0.830525	0.751734	0.698063	0.947367	0.8945	0.0161081	FC	0.453861	0.462206	0.947891	0.753509	0.00223236
PMI_009789; Pmi_639050_LR16A_HUMAN_Leucine-rich_repeat-containing_protein_16A|m.22488	S1576; S707	XP_022103388.1 F-actin-uncapping protein LRRC16A-like isoform X1 [Acanthaster planci] (id=71.02%; len=949; e=0.00E+00) ; LR16A_HUMAN_Leucine-rich_repeat-containing_protein_16A	AVKPLVSPRGVKS; AVKPLVSPRTP--	2,3	2.215	0.6718	0.043394	1	3	5	4	8	S1576; S707	0.0773032	0.785712	0.933037	0.882708	0.731337	0.997311	0.992895	7.55372e-05	FC	0.0816614	0.195918	0.97672	0.00346582	6.07747e-05
30919|m.22255; PMI_013519	S57; S750	XP_022087074.1 inositol hexakisphosphate and diphosphoinositol-pentakisphosphate kinase 2-like isoform X7 [Acanthaster planci] (id=56.14%; len=114; e=4.43E-28) ; XP_022087074.1 inositol hexakisphosphate and diphosphoinositol-pentakisphosphate kinase 2-like isoform X7 [Acanthaster planci] (id=81.32%; len=819; e=0.00E+00)	RKPRGGSETGSLD; RKPRGGSETGSLD	3	5.261	0.705	0.556488	0.99755	3	1	2	4	S57; S750	0.064765	0.81546	0.86887	0.891165	0.793486	0.904152	0.913216	0.0109704	FC	0.946483	0.807034	0.983516	0.0172472	0.0407483
Pmi_662252_NOP58_HUMAN_Nucleolar_protein_58|m.29040	S544	NOP58_HUMAN_Nucleolar_protein_58	PEEAPSSEKKKKK	2,3,4,5	4.77	0.7442	0.019905	0.99752	7	4	7	7	S544	0.0644995	0.77839	0.952728	0.944556	0.817156	0.989564	0.958746	0.00251768	FC	0.0429754	0.118414	0.952219	0.00763801	0.000799841
PMI_021333; PMI_010061	S41; S1199	XP_022102143.1 GATOR complex protein DEPDC5-like isoform X1 [Acanthaster planci] (id=58.08%; len=198; e=2.69E-65) ; XP_022102143.1 GATOR complex protein DEPDC5-like isoform X1 [Acanthaster planci] (id=75.70%; len=1255; e=0.00E+00)	SSTSPRSLKEEGE; SSTSPRSLKEEGE	3	3.326	0.7315	1.04827	1	1	1	1		S41; S1199	0.161775	0.266927	0.636132	0.79093	0.684944	1	0.97447	0.000969331	FC
Pmi_614400_SPN90_HUMAN_NCK-interacting_protein_with_SH3_domain|m.17415; PMI_019742	S173; S173	SPN90_HUMAN_NCK-interacting_protein_with_SH3_domain; XP_022081462.1 NCK-interacting protein with SH3 domain-like [Acanthaster planci] (id=75.85%; len=646; e=0.00E+00)	PNDRLSSPVLNND; PNDRLSSPVLNND	2	2.644	0.6963	0.002189	1	2	1	1	1	S173; S173	0.0735649	0.358511	0.804594	0.85814	0.773139	1	0.988686	0.000191292	FC	0.0661951	0.122085	0.889304	0.14296	0.00365502
PMI_001775; PMI_005986; Pmi_638111_P20L1_BOVIN_PHD_finger_protein_20-like_protein_1|m.22268	S744; S743; S743	XP_022091079.1 uncharacterized protein LOC110979526 isoform X1 [Acanthaster planci] (id=59.69%; len=1843; e=0.00E+00) ; XP_022091082.1 uncharacterized protein LOC110979526 isoform X4 [Acanthaster planci] (id=60.25%; len=1844; e=0.00E+00) ; P20L1_BOVIN_PHD_finger_protein_20-like_protein_1	QKRRHPSASQTPA; QKRRHPSASQTPA; QKRRHPSASQTPA	3,4	3.111	0.6227	0.024489	0.99999	5	4	4		S744; S743; S743	0.108901	0.556519	0.830053	0.708018	0.779347	1	0.872059	0.0235063	FC
PMI_004532; PMI_009189; Pmi_669832_CNOT1_XENTR_CCR4-NOT_transcription_complex_subunit_1|m.31624	T1880; T2215; T1481	XP_014665399.1 PREDICTED: CCR4-NOT transcription complex subunit 1-like [Priapulus caudatus] (id=49.04%; len=1972; e=0.00E+00) ; XP_022094484.1 CCR4-NOT transcription complex subunit 1-like [Acanthaster planci] (id=92.04%; len=1658; e=0.00E+00) ; CNOT1_XENTR_CCR4-NOT_transcription_complex_subunit_1	RLPDPFTPNLKDL; RLPDPFTPNLKVE; RLPDPFTPNLKVE	3	2.004	0.4419	0.63121	1	1	1	1		T1880; T2215; T1481	0.0810262	0.287471	0.844776	0.893238	0.83654	1	0.997342	1.05902e-05	FC
74046|m.49503; Pmi_666630_STK31_MOUSE_Serine/threonine-protein_kinase_31|m.30412; PMI_010121	S30; S421; S253	XP_011670570.1 PREDICTED: serine/threonine-protein kinase 31, partial [Strongylocentrotus purpuratus] (id=33.60%; len=741; e=2.06E-107) ; STK31_MOUSE_Serine/threonine-protein_kinase_31; XP_011670570.1 PREDICTED: serine/threonine-protein kinase 31, partial [Strongylocentrotus purpuratus] (id=34.01%; len=738; e=4.37E-106)	SPNTAKSPSYQKT; SPNTAKSPSYQKT; SPNTAKSPSYQKT	2,3,4	2.939	0.5401	0.018129	1	4	3	3		S30; S421; S253	0.0853214	0.767657	0.901149	0.740703	0.73572	1	0.95702	0.00273122	FC
Pmi_605291_no_annot|m.15954; PMI_028166	S214; S367	no_annot; XP_022086836.1 uncharacterized protein LOC110977222 isoform X3 [Acanthaster planci] (id=65.47%; len=1254; e=0.00E+00)	LPRSVVSPTDIPP; LPRSVVSPTDIPP	2,3	2.319	0.5364	0.053112	0.99774	2	2	2		S214; S367	0.0581104	0.435092	0.86914	0.851565	0.872378	1	0.9795	0.000626088	FC
Pmi_633600_F261_RAT_6-phosphofructo-2-kinase/fructose-2,6-bisphosphatase_1|m.21243; 46253|m.30968	S467; S467	F261_RAT_6-phosphofructo-2-kinase/fructose-2,6-bisphosphatase_1; XP_022097665.1 6-phosphofructo-2-kinase/fructose-2,6-bisphosphatase 1-like isoform X7 [Acanthaster planci] (id=91.92%; len=483; e=0.00E+00)	FQDARSSLNSDVK; FQDARSSLNSDVK	2	1.85	0.4968	0.311575	1	1	1	1		S467; S467	0.0585359	0.186246	0.646899	0.789568	0.916245	1	0.983003	0.000430884	FC
Pmi_318320_HMCS1_CHICK_Hydroxymethylglutaryl-CoA_synthase,_cytoplasmic|m.1488	S92	HMCS1_CHICK_Hydroxymethylglutaryl-CoA_synthase,_cytoplasmic	DSAPVSSPIESLK	3,4,5	5.72	0.7596	0.127042	1	6	8	7	3	S92	0.1097	0.483252	0.945379	0.897845	0.90831	0.973913	0.957351	0.00268964	FC	0.259668	0.296581	0.935739	0.0888644	0.00329907
Pmi_614560_SIR2_PONAB_NAD-dependent_protein_deacetylase_sirtuin-2|m.17442	S411	SIR2_PONAB_NAD-dependent_protein_deacetylase_sirtuin-2	PSTKAESPSKAEA	2,3,4	3.603	0.7102	0.075459	1	5	5	6	2	S411	0.0943495	0.718673	0.873812	0.837348	0.762052	0.979022	0.966223	0.00169208	FC	0.14581	0.168708	0.896102	0.480864	0.00688786
PMI_013415	S141	XP_022107575.1 NAD-dependent protein deacetylase sirtuin-2-like isoform X2 [Acanthaster planci] (id=73.33%; len=150; e=4.08E-64)	ASTKAESPSKAEA	2,3,4	2.916	0.6818	0.075459	1	5	5	6	1	S141	0.0943495	0.718673	0.873812	0.837348	0.762052	0.979022	0.966223	0.00169208	FC	0.147539	0.169983	0.897194	0.511261	0.00719897
Pmi_645661_PCM1_XENLA_Pericentriolar_material_1_protein|m.24206; PMI_000800	T122; T168	PCM1_XENLA_Pericentriolar_material_1_protein; XP_022084430.1 pericentriolar material 1 protein-like isoform X3 [Acanthaster planci] (id=76.70%; len=2279; e=0.00E+00)	ESTRRHTPATFPR; ESTRRHTPATFPR	2	1.557	0.5337	0.510608	1	1	2	1	1	T122; T168	0.102552	0.910843	0.653621	0.534591	0.858803	1	0.9182	0.00976323	FC	0.924735	0.78797	0.291951	0.128706	0.00338172
Pmi_661880_no_annot|m.28886; 47026|m.31429; PMI_007445	S89; S89; S82	no_annot; XP_022102112.1 uncharacterized protein LOC110985412 [Acanthaster planci] (id=55.13%; len=234; e=2.17E-64) ; XP_022102212.1 muscle M-line assembly protein unc-89-like [Acanthaster planci] (id=54.08%; len=490; e=1.79E-133)	QKVQHESGEPTMR; QKVQHESGEPTMR; QKVQHESGEPTMR	3	1.412	0.5234	0.048502	1	1	2	1		S89; S89; S82	0.246843	0.199078	0.457055	0.338644	0.732456	1	0.979457	0.000628687	FC
84242|m.56443; Pmi_639461_HDC_HUMAN_Headcase_protein_homolog|m.22574	S173; S173	XP_022082580.1 headcase protein homolog [Acanthaster planci] (id=81.14%; len=562; e=0.00E+00) ; HDC_HUMAN_Headcase_protein_homolog	QRRRKKSSDKPSI; QRRRKKSSDKPSI	3	1.738	0.5718	0.06725	0.99999	2	3	2		S173; S173	0.070636	0.68043	0.878418	0.7874	0.725345	1	0.971108	0.00124006	FC
PMI_000869; PMI_000871; PMI_005516	S112; S106; S99	sp|P02256.1|H1_PARAN RecName: Full=Histone H1, gonadal (id=57.76%; len=116; e=2.93E-26) ; KXJ62373.1 hypothetical protein RP20_CCG015761 [Aedes albopictus] (id=55.44%; len=92; e=4.88E-25) ; sp|P06144.1|H1_LYTPI RecName: Full=Late histone H1 (id=68.06%; len=72; e=1.75E-24)	ALRSGVSKGSLQQ; ALRSGVSKGSLQQ; ALRSGVSKGSLQQ	3	1.841	0.3656	0.6582	1	1	2	1		S112; S106; S99	0.048347	0.0217311	0.892216	0.680976	0.652587	0.961246	0.959102	0.00247471	FC
PMI_015629; 8936|m.5315; Pmi_517020_PKHF2_CHICK_Pleckstrin_homology_domain-containing_family_F..CUT|m.7169	S138; S31; S146	XP_022096467.1 pleckstrin homology domain-containing family F member 2-like isoform X1 [Acanthaster planci] (id=82.18%; len=303; e=1.36E-169) ; XP_022096467.1 pleckstrin homology domain-containing family F member 2-like isoform X1 [Acanthaster planci] (id=94.30%; len=158; e=6.52E-99) ; PKHF2_CHICK_Pleckstrin_homology_domain-containing_family_F..CUT	KPATELSPVWVPD; KPATELSPVWVPD; KPATELSPVWVPD	3,4	4.922	0.6213	0.210268	0.99998	3	3	3		S138; S31; S146	0.0735263	0.374004	0.807104	0.749376	0.891021	1	0.990438	0.000136719	FC
Pmi_665860_SCAPE_HUMAN_S_phase_cyclin_A-associated_protein_in_the_end..CUT|m.30143	S145	SCAPE_HUMAN_S_phase_cyclin_A-associated_protein_in_the_end..CUT	DKKVKQSPTSTKS	3	1.696	0.4023	0.520722	1	1	1	1		S145	0.081638	0.503262	0.860922	0.777372	0.661096	1	0.965912	0.0017232	FC
64514|m.42924; PMI_010002; Pmi_657720_ACAP2_CHICK_Arf-GAP_with_coiled-coil,_ANK_repeat_and_PH_..CUT|m.27515	S764; S680; S546	XP_022085475.1 arf-GAP with coiled-coil, ANK repeat and PH domain-containing protein 2-like isoform X2 [Acanthaster planci] (id=89.63%; len=762; e=0.00E+00) ; XP_022085475.1 arf-GAP with coiled-coil, ANK repeat and PH domain-containing protein 2-like isoform X2 [Acanthaster planci] (id=84.51%; len=723; e=0.00E+00) ; ACAP2_CHICK_Arf-GAP_with_coiled-coil,_ANK_repeat_and_PH_..CUT	EPDKPTSPDT---; EPDKPTSPDT---; EPDKPTSPDT---	2,3	2.583	0.7696	0.001678	1	3	4	2	3	S764; S680; S546	0.073345	0.28574	0.862117	0.884621	0.804796	0.996918	0.965806	0.0017339	FC	0.0818912	0.161597	0.98333	0.000118487	0.000161728
Pmi_664653_ANR17_HUMAN_Ankyrin_repeat_domain-containing_protein_17|m.29730	S907	ANR17_HUMAN_Ankyrin_repeat_domain-containing_protein_17	DPQDGHSPKLEAL	2	1.405	0.4726	0.002226	1	1	1	1		S907	0.0727804	0.472035	0.949692	0.786192	0.74655	0.99695	0.930589	0.00705965	FC
PMI_023939; 59907|m.39663; Pmi_628421_RBP2_HUMAN_E3_SUMO-protein_ligase_RanBP2|m.20162; PMI_006293	S375:S381; S12:S18; S89:S95; S1657:S1663	XP_022088005.1 E3 SUMO-protein ligase RanBP2-like isoform X2 [Acanthaster planci] (id=65.15%; len=617; e=0.00E+00) ; XP_022088004.1 E3 SUMO-protein ligase RanBP2-like isoform X1 [Acanthaster planci] (id=62.74%; len=263; e=4.26E-97) ; RBP2_HUMAN_E3_SUMO-protein_ligase_RanBP2; XP_022088004.1 E3 SUMO-protein ligase RanBP2-like isoform X1 [Acanthaster planci] (id=55.22%; len=1523; e=0.00E+00)	SPVKPKSPGFMKS,SPGFMKSPGFNKS; SPVKPKSPGFMKS,SPGFMKSPGFNKS; SPVKPKSPGFMKS,SPGFMKSPGFNKS; SPVKPKSPGFMKS,SPGFMKSPGFNKS	2,3,4	3.162	0.6251	0.025829	1	10	12	10	6	S375:S381; S12:S18; S89:S95; S1657:S1663	0.088846	0.897604	0.823041	0.780908	0.715495	1	0.972421	0.00113045	FC	0.208264	0.412248	0.976257	0.031818	0.000432039
PMI_003933	S12	XP_022108904.1 ran-specific GTPase-activating protein-like [Acanthaster planci] (id=79.92%; len=259; e=1.30E-140)	TEEAPHSPEIHFE	2,3,4	5.765	0.7853	0.003648	1	61	42	42	21	S12	0.0959356	0.439544	0.8289	0.882174	0.810609	1	0.982783	0.000442098	FC	0.145875	0.200681	0.915259	0.327722	0.00484686
Pmi_606300_CSKP_MOUSE_Peripheral_plasma_membrane_protein_CASK|m.16104; PMI_017638	S465; S90	CSKP_MOUSE_Peripheral_plasma_membrane_protein_CASK; XP_022088001.1 peripheral plasma membrane protein CASK-like isoform X1 [Acanthaster planci] (id=83.30%; len=461; e=0.00E+00)	VTPPPTSPFLNGR; VTPPPTSPFLNGR	2,3	3.882	0.7223	0.190097	1	2	2	1		S465; S90	0.050432	0.482633	0.832887	0.790185	0.755333	1	0.973531	0.0010416	FC
PMI_000876; PMI_000024	S1651:S1655; S1629:S1633	XP_011665894.1 PREDICTED: hydrocephalus-inducing protein homolog [Strongylocentrotus purpuratus] (id=66.72%; len=5219; e=0.00E+00) ; XP_022110484.1 hydrocephalus-inducing protein homolog, partial [Acanthaster planci] (id=87.31%; len=3019; e=0.00E+00)	AGTGAGSPMPSPT,AGSPMPSPTPRDP; AGTGAGSPMPSPT,AGSPMPSPTPRDP	2,3,4	3.078	0.6587	0.06855	0.99625	4	1	4	6	S1651:S1655; S1629:S1633	0.090252	0.286137	0.656144	0.820791	0.895115	1	0.95396	0.00313076	FC	0.32947	0.368022	0.959571	0.392945	0.00172378
PMI_017424; Pmi_666650_K0586_HUMAN_Uncharacterized_protein_KIAA0586|m.30419; 48640|m.32541	S532; S1229; S302	XP_022081340.1 TALPID3 protein-like isoform X2 [Acanthaster planci] (id=62.44%; len=1174; e=0.00E+00) ; K0586_HUMAN_Uncharacterized_protein_KIAA0586; XP_022081340.1 TALPID3 protein-like isoform X2 [Acanthaster planci] (id=74.38%; len=843; e=0.00E+00)	VATPLASPSGASP; VATPLASPSGASP; VATPLASPSGASP	3	5.019	0.7165	0.227265	0.99711	1	1	1		S532; S1229; S302	0.125663	0.554163	0.479827	0.838469	0.687216	0.959258	0.938222	0.00560686	FC
Pmi_466860_NISCH_RAT_Nischarin|m.4563	S95:S99	NISCH_RAT_Nischarin	TSSRSKSPDRSPN,SKSPDRSPNAMDP	3,4	3.413	0.671	0.062443	0.99776	7	5	8	4	S95:S99	0.0932881	0.509004	0.730449	0.662546	0.767611	1	0.968099	0.00151025	FC	0.161913	0.189771	0.958927	0.147596	0.000198038
56674|m.37490; 56675|m.37492; PMI_022714; 56672|m.37486	S82; S82; S82; S82	XP_022106586.1 CUGBP Elav-like family member 3 isoform X1 [Acanthaster planci] (id=98.11%; len=528; e=0.00E+00) ; XP_022106586.1 CUGBP Elav-like family member 3 isoform X1 [Acanthaster planci] (id=93.85%; len=553; e=0.00E+00) ; XP_022106586.1 CUGBP Elav-like family member 3 isoform X1 [Acanthaster planci] (id=100.00%; len=116; e=2.16E-77) ; XP_022106586.1 CUGBP Elav-like family member 3 isoform X…	LKSCMTSPPQTIP; LKSCMTSPPQTIP; LKSCMTSPPQTIP; LKSCMTSPPQTIP	2,3,4	3.417	0.6711	0.010228	0.99726	19	19	17	10	S82; S82; S82; S82	0.0915238	0.456589	0.737274	0.757867	0.853645	1	0.967494	0.00156779	FC	0.112786	0.147417	0.994761	0.0296473	2.6921e-09
Pmi_669270_DNM3A_HUMAN_DNA_(cytosine-5)-methyltransferase_3A|m.31370	S780	DNM3A_HUMAN_DNA_(cytosine-5)-methyltransferase_3A	GPRQRRSPSDRPV	2,3,4	1.832	0.4482	0.134858	1	2	2	1		S780	0.114914	0.585162	0.881469	0.793383	0.67759	1	0.982378	0.000463047	FC
Pmi_669120_DYST_MOUSE_Dystonin|m.31302; PMI_013393; PMI_000518	S687; S453; S4800	DYST_MOUSE_Dystonin; XP_022102245.1 uncharacterized protein LOC110985497 isoform X4 [Acanthaster planci] (id=83.82%; len=2212; e=0.00E+00) ; XP_022102245.1 uncharacterized protein LOC110985497 isoform X4 [Acanthaster planci] (id=79.20%; len=3784; e=0.00E+00)	QITAKKSPVNESY; QITAKKSPVNESY; QITAKKSPVNESY	2,3	2.649	0.5687	0.031769	1	1	2	3	1	S687; S453; S4800	0.0818782	0.240978	0.691764	0.735087	0.725868	1	0.965563	0.00175848	FC	0.38863	0.380731	0.985998	0.696758	1.35631e-06
PMI_014969; PMI_011380	S338; S338	XP_022088992.1 WD repeat-containing protein 47-like isoform X1 [Acanthaster planci] (id=88.55%; len=961; e=0.00E+00) ; XP_022088992.1 WD repeat-containing protein 47-like isoform X1 [Acanthaster planci] (id=88.65%; len=960; e=0.00E+00)	GKKKEDSPGQEVN; GKKKEDSPGQEVN	2,3,4	3.729	0.7325	0.028182	1	15	13	12	12	S338; S338	0.0977293	0.833213	0.91055	0.835079	0.860397	0.99091	0.973052	0.00107954	FC	0.0469145	0.130309	0.997745	0.0137254	2.31743e-06
25026|m.18919; PMI_004395	S376; S775	XP_022100951.1 BMP-2-inducible protein kinase-like isoform X2 [Acanthaster planci] (id=74.15%; len=147; e=1.10E-63) ; XP_022100951.1 BMP-2-inducible protein kinase-like isoform X2 [Acanthaster planci] (id=80.54%; len=663; e=0.00E+00)	GDFATLSPDQVVD; GDFATLSPDQVVD	3,4,5	5.257	0.7445	0.047971	1	8	12	8		S376; S775	0.130189	0.314656	0.821735	0.814047	0.853257	0.951939	0.92291	0.0086852	FC
PMI_006293; PMI_023939; 59907|m.39663; Pmi_628421_RBP2_HUMAN_E3_SUMO-protein_ligase_RanBP2|m.20162	S1669; S387; S24; S101	XP_022088004.1 E3 SUMO-protein ligase RanBP2-like isoform X1 [Acanthaster planci] (id=55.22%; len=1523; e=0.00E+00) ; XP_022088005.1 E3 SUMO-protein ligase RanBP2-like isoform X2 [Acanthaster planci] (id=65.15%; len=617; e=0.00E+00) ; XP_022088004.1 E3 SUMO-protein ligase RanBP2-like isoform X1 [Acanthaster planci] (id=62.74%; len=263; e=4.26E-97) ; RBP2_HUMAN_E3_SUMO-protein_ligase_RanBP2	SPGFNKSGDNEYY; SPGFNKSGDNEYY; SPGFNKSGDNEYY; SPGFNKSGDNEYY	2,3	2.051	0.5129	0.005695	1	2	2	2		S1669; S387; S24; S101	0.0758334	0.479883	0.736031	0.647635	0.669782	0.997243	0.808797	0.0513429	FC
PMI_021570; Pmi_659100_CHD3_HUMAN_Chromodomain-helicase-DNA-binding_protein_3|m.27963	S71; S842	XP_022104219.1 chromodomain-helicase-DNA-binding protein 5-like isoform X4 [Acanthaster planci] (id=97.29%; len=258; e=1.95E-170) ; CHD3_HUMAN_Chromodomain-helicase-DNA-binding_protein_3	IREHEFSFEEDAV; IREHEFSFEEDAV	2,3	2.239	0.6708	0.035825	1	1	1	1		S71; S842	0.0945782	0.352825	0.854531	0.874907	0.826975	1	0.980626	0.000559412	FC
76050|m.50778; PMI_005116	S158:S162; S158:S162	XP_022103451.1 retinoic acid-induced protein 1-like [Acanthaster planci] (id=83.80%; len=1179; e=0.00E+00) ; XP_022103451.1 retinoic acid-induced protein 1-like [Acanthaster planci] (id=83.30%; len=1132; e=0.00E+00)	QYPSPFSPGHSPR,PFSPGHSPRASQI; QYPSPFSPGHSPR,PFSPGHSPRASQI	3	3.563	0.7435	0.245586	1	1	1	1	1	S158:S162; S158:S162	0.160543	0.156294	0.131766	0.360573	0.378166	1	0.921674	0.00896209	FC	0.516978	0.528684	0.845262	0.867634	0.0577376
9547|m.5766; Pmi_487150_no_annot|m.5545	S354:S359; S354:S359	XP_022104818.1 uncharacterized protein LOC110986863 [Acanthaster planci] (id=44.53%; len=393; e=9.64E-70) ; no_annot	DLNVPKSPTVISP,KSPTVISPVDQAS; DLNVPKSPTVISP,KSPTVISPVDQAS	3,4	3.56	0.557	0.30389	0.99572	1	1	1	1	S354:S359; S354:S359	0.0735414	0.395565	0.880988	0.821199	0.753512	1	0.991037	0.000120133	FC	0.123498	0.157359	0.966674	0.17	0.000163495
PMI_008387; PMI_011224; Pmi_662880_ANR28_MOUSE_Serine/threonine-protein_phosphatase_6_regula..CUT|m.29205	S1042; S1042; S1028	XP_022109223.1 serine/threonine-protein phosphatase 6 regulatory ankyrin repeat subunit A-like [Acanthaster planci] (id=91.07%; len=1075; e=0.00E+00) ; XP_022109223.1 serine/threonine-protein phosphatase 6 regulatory ankyrin repeat subunit A-like [Acanthaster planci] (id=90.98%; len=1075; e=0.00E+00) ; ANR28_MOUSE_Serine/threonine-protein_phosphatase_6_regula..CUT	RIALAMSGELGRL; RIALAMSGELGRL; RIALAMSGELGRL	2	2.283	0.5209	0.178398	1	1	1	1		S1042; S1042; S1028	0.0934988	0.252601	0.693512	0.787825	0.790138	1	0.992734	7.8998e-05	FC
Pmi_640260_DEPD5_HUMAN_DEP_domain-containing_protein_5|m.22839; PMI_010061	S487; S534	DEPD5_HUMAN_DEP_domain-containing_protein_5; XP_022102143.1 GATOR complex protein DEPDC5-like isoform X1 [Acanthaster planci] (id=75.70%; len=1255; e=0.00E+00)	KVPSYASPKPRTP; KVPSYASPKPRTP	2	1.457	0.5415	0.491262	1	1	1	1		S487; S534	0.121536	0.401267	0.51418	0.611385	0.645299	1	0.950938	0.00355154	FC
13020|m.8291; Pmi_588200_no_annot|m.13530	S399; S366	13020|g.8291 type:3prime_partial len:497 gc:universal 13020:1489-2(-); no_annot	GDIISPSPRKPSQ; GDIISPSPRKPSQ	3	3.901	0.7156	0.20226	1	1	2	1		S399; S366	0.0985955	0.192784	0.234497	0.332314	0.583071	1	0.990804	0.00012645	FC
Pmi_663780_F134C_MOUSE_Protein_FAM134C|m.29473; 56643|m.37473; PMI_007876	S313; S305; S334	F134C_MOUSE_Protein_FAM134C; XP_022079724.1 reticulophagy regulator 3-like isoform X1 [Acanthaster planci] (id=74.64%; len=485; e=0.00E+00) ; XP_022079724.1 reticulophagy regulator 3-like isoform X1 [Acanthaster planci] (id=69.83%; len=547; e=0.00E+00)	GREKQRSPEGMPF; GREKQRSPEGMPF; DREKQRSPEGMPF	3	2.699	0.7139	0.30544	1	3	2	3	1	S313; S305; S334	0.076251	0.651354	0.886565	0.875159	0.819832	0.946498	0.936634	0.00589572	FC	0.12748	0.164598	0.937215	0.310533	0.00147373
53459|m.35501; Pmi_659952_no_annot|m.28246	S1094; S1561	XP_022100191.1 uncharacterized protein LOC110984363 isoform X2 [Acanthaster planci] (id=59.86%; len=1328; e=0.00E+00) ; no_annot	RSSSVSSPEQEVV; RSSSVSSPEQEVV	2,3	4.172	0.738	0.080221	1	2	2	3	2	S1094; S1561	0.0881413	0.251341	0.0778317	0.15296	0.181899	1	0.996438	1.90093e-05	FC	0.498183	0.428727	0.945938	0.0151455	0.00194522
Pmi_645991_GORS2_HUMAN_Golgi_reassembly-stacking_protein_2|m.24277; PMI_007079; PMI_005483	S247:T248; S199:T200; S35:T36	GORS2_HUMAN_Golgi_reassembly-stacking_protein_2; XP_022110187.1 Golgi reassembly-stacking protein 2-like [Acanthaster planci] (id=91.29%; len=333; e=0.00E+00) ; XP_022110187.1 Golgi reassembly-stacking protein 2-like [Acanthaster planci] (id=84.61%; len=169; e=4.37E-83)	AEVSLASTPDTSQ,EVSLASTPDTSQI; AEVSLASTPDTSQ,EVSLASTPDTSQI; AEVSLASTPDTSQ,EVSLASTPDTSQI	3,4	5.259	0.4305	0.352669	0.99998	2	1	2		S247:T248; S199:T200; S35:T36	0.0559204	0.133646	0.356379	0.558383	0.775948	1	0.976213	0.000842038	FC
Pmi_657073_MVP_STRPU_Major_vault_protein|m.27327	S860	MVP_STRPU_Major_vault_protein	LGGMVASPEAD--	3,4	3.517	0.7552	0.015998	1	7	7	8		S860	0.156701	0.465093	0.833965	0.700899	0.753948	0.953415	0.985836	0.000299526	FC
PMI_000300; 19901|m.14441; Pmi_651512_ALMS1_HUMAN_Alstrom_syndrome_protein_1|m.25698	S2037; S328; S885	XP_022091832.1 uncharacterized protein LOC110979943 [Acanthaster planci] (id=67.92%; len=1989; e=0.00E+00) ; XP_022091832.1 uncharacterized protein LOC110979943 [Acanthaster planci] (id=72.39%; len=402; e=1.47E-161) ; ALMS1_HUMAN_Alstrom_syndrome_protein_1	PVSSALSPVLETS; PVSSALSPVLETS; PVSSALSPVLETS	3	3.899	0.6091	0.161578	1	1	1	1		S2037; S328; S885	0.112189	0.525038	0.665873	0.868769	0.742165	1	0.987392	0.000237456	FC
Pmi_654692_KANL1_HUMAN_KAT8_regulatory_NSL_complex_subunit_1|m.26615	S507	KANL1_HUMAN_KAT8_regulatory_NSL_complex_subunit_1	ILGEPSSPEDLLK	2,3	3.829	0.5767	0.033922	1	3	2	5		S507	0.110562	0.395189	0.909606	0.862692	0.747063	0.984334	0.988786	0.000187913	FC
Pmi_659212_RFA1_HUMAN_Replication_protein_A_70_kDa_DNA-binding_subunit|m.28031	S183	RFA1_HUMAN_Replication_protein_A_70_kDa_DNA-binding_subunit	PSTGMMSPPKQAQ	2,3,4,5	7.508	0.7631	0.004499	1	43	52	42	32	S183	0.117765	0.563952	0.830134	0.733409	0.825467	0.993961	0.890406	0.0173583	FC	0.134736	0.171359	0.953221	0.0521044	0.00156198
PMI_003641; PMI_003441	S105; S85	XP_022094508.1 flap endonuclease 1-like [Acanthaster planci] (id=91.82%; len=379; e=0.00E+00) ; XP_022094508.1 flap endonuclease 1-like [Acanthaster planci] (id=80.06%; len=316; e=5.00E-176)	KRKERRSEAEKEL; KRKERRSEAEKEL	3,4	2.235	0.5521	0.204734	1	3	4	3	2	S105; S85	0.0703254	0.246001	0.81097	0.906582	0.890413	1	0.987713	0.000225536	FC	0.0345647	0.0929378	0.957032	0.0272749	0.000555143
Pmi_668021_BAZ1B_HUMAN_Tyrosine-protein_kinase_BAZ1B|m.30901; 80698|m.54249; 80694|m.54238; 80695|m.54241	S337; S337; S323; S323	BAZ1B_HUMAN_Tyrosine-protein_kinase_BAZ1B; XP_022094996.1 tyrosine-protein kinase BAZ1B-like isoform X2 [Acanthaster planci] (id=79.71%; len=1104; e=0.00E+00) ; XP_022095000.1 tyrosine-protein kinase BAZ1B-like isoform X5 [Acanthaster planci] (id=79.52%; len=991; e=0.00E+00) ; XP_022095000.1 tyrosine-protein kinase BAZ1B-like isoform X5 [Acanthaster planci] (id=79.21%; len=991; e=0.00E+00)	DPNQMSSPEKVRM; DPNQMSSPEKVRM; DPNQMSSPEKVRM; DPNQMSSPEKVRM	3	3.001	0.6831	0.019652	1	1	1	1		S337; S337; S323; S323	0.100021	0.278576	0.48597	0.481734	0.597862	1	0.984327	0.000366516	FC
21092|m.15723; Pmi_670100_FRY_HUMAN_Protein_furry_homolog|m.31750	S289; S1813	XP_022079670.1 LOW QUALITY PROTEIN: protein furry homolog-like [Acanthaster planci] (id=88.79%; len=972; e=0.00E+00) ; FRY_HUMAN_Protein_furry_homolog	KVGLPRSPSVIFS; KVGLPRSPSVIFS	2,3	4.86	0.7488	0.278053	1	4	3	3	2	S289; S1813	0.0801766	0.383597	0.843443	0.852323	0.744747	1	0.977315	0.000766074	FC	0.190821	0.266879	0.935231	0.0490182	0.000292727
PMI_007662; Pmi_622400_TSNAX_MACFA_Translin-associated_protein_X|m.18912	S24; S24	XP_022097266.1 translin-associated protein X-like [Acanthaster planci] (id=73.53%; len=306; e=5.89E-161) ; TSNAX_MACFA_Translin-associated_protein_X	PAKRSQSGDSWPA; PAKRSQSGDSWPA	2,3	3.106	0.5752	0.096714	1	2	3	2	1	S24; S24	0.0918469	0.14177	0.790292	0.714409	0.718339	1	0.989869	0.000153435	FC	0.0992808	0.176684	0.964734	0.0211943	0.000524112
Pmi_649130_TXB1A_DANRE_Tax1-binding_protein_1_homolog_A|m.25062	S253	TXB1A_DANRE_Tax1-binding_protein_1_homolog_A	AENEVRSPPGYNP	2,3	3.155	0.6441	0.316778	1	1	3	2	4	S253	0.110317	0.646525	0.946927	0.776406	0.826277	1	0.943116	0.00476172	FC	0.291316	0.33171	0.94966	0.212211	0.000215132
PMI_005528; 13026|m.8298; Pmi_600240_OPTN_DANRE_Optineurin|m.15188	S321; S88; S282	XP_022081250.1 optineurin-like isoform X1 [Acanthaster planci] (id=70.31%; len=805; e=0.00E+00) ; XP_022081250.1 optineurin-like isoform X1 [Acanthaster planci] (id=71.68%; len=512; e=0.00E+00) ; OPTN_DANRE_Optineurin	LPPTPFSPGQAIK; LPPTPFSPGQAIK; LPPTPFSPGQAIK	3,4	4.993	0.7346	0.121631	1	6	6	7	2	S321; S88; S282	0.117067	0.809426	0.76501	0.780359	0.767931	1	0.977906	0.000726815	FC	0.235813	0.248258	0.952772	0.739675	0.000294873
PMI_012926; 52249|m.34680	T810; T839	XP_022091459.1 ubiquitin carboxyl-terminal hydrolase 36-like isoform X2 [Acanthaster planci] (id=69.87%; len=1530; e=0.00E+00) ; XP_022091459.1 ubiquitin carboxyl-terminal hydrolase 36-like isoform X2 [Acanthaster planci] (id=74.86%; len=1058; e=0.00E+00)	VFGWNITPSKSVN; VFGWNITPSKSVN	2,3	3.675	0.6432	0.007855	1	1	2	1		T810; T839	0.111852	0.86182	0.904675	0.649015	0.66503	0.995226	0.96649	0.00166552	FC
59009|m.39054; PMI_012773; PMI_012317	S68; S68; S68	XP_022096574.1 protein RRP5 homolog [Acanthaster planci] (id=79.13%; len=1792; e=0.00E+00) ; XP_022096574.1 protein RRP5 homolog [Acanthaster planci] (id=76.78%; len=1641; e=0.00E+00) ; XP_022096574.1 protein RRP5 homolog [Acanthaster planci] (id=64.75%; len=1322; e=0.00E+00)	DEEDDESPLKRFQ; DEEDDESPLKRFQ; DEEDDESPLKRFQ	2,3	1.988	0.6811	0.026121	1	3	4	3	1	S68; S68; S68	0.0989555	0.376165	0.946705	0.906171	0.786926	0.958517	0.97928	0.000639503	FC	0.236056	0.254198	0.951211	0.518071	0.000948671
Pmi_645190_PERQ2_DANRE_PERQ_amino_acid-rich_with_GYF_domain-containi..CUT|m.24044	S523	PERQ2_DANRE_PERQ_amino_acid-rich_with_GYF_domain-containi..CUT	TPTADESPATTEK	2,3	4.495	0.6443	0.198686	1	3	2	3		S523	0.082452	0.499838	0.914171	0.8963	0.780565	1	0.977231	0.000771728	FC
Pmi_639930_VPS18_DANRE_Vacuolar_protein_sorting-associated_protein_1..CUT|m.22684	S919	VPS18_DANRE_Vacuolar_protein_sorting-associated_protein_1..CUT	QLQTHRSPASSAP	2,3	3.484	0.6544	0.054945	1	4	5	3		S919	0.0982266	0.450905	0.841792	0.782713	0.710739	1	0.968168	0.0015038	FC
PMI_028733; PMI_011374	S151; S142	XP_022102861.1 dual specificity testis-specific protein kinase 2-like [Acanthaster planci] (id=75.64%; len=234; e=8.02E-115) ; XP_022102861.1 dual specificity testis-specific protein kinase 2-like [Acanthaster planci] (id=66.38%; len=235; e=1.10E-91)	DSLRPLSPGSSAV; DSLRPLSPGSSAV	3,4	3.781	0.6652	0.002991	1	4	5	6	5	S151; S142	0.0869561	0.58275	0.817269	0.839288	0.804945	1	0.987812	0.000221923	FC	0.141601	0.336372	0.952789	6.81636e-06	0.000801057
PMI_024157; PMI_004936	S200; S239	XP_022103513.1 biotin--protein ligase-like isoform X1 [Acanthaster planci] (id=72.17%; len=503; e=0.00E+00) ; XP_022103514.1 biotin--protein ligase-like isoform X2 [Acanthaster planci] (id=79.45%; len=915; e=0.00E+00)	GSPFHRSPSGNSL; GSPFHRSPSGNSL	2	1.891	0.4913	0.028969	0.99999	2	2	3		S200; S239	0.0653086	0.489051	0.580417	0.612227	0.557234	1	0.979551	0.000622994	FC
PMI_012297; PMI_026367	S593; S30	XP_022102800.1 protein JBTS17-like [Acanthaster planci] (id=57.34%; len=572; e=0.00E+00) ; XP_022102851.1 uncharacterized protein LOC110985804 [Acanthaster planci] (id=68.03%; len=122; e=9.01E-50)	PRHGQRSPGVEEL; PRQGQRSPGVEEL	2	2.539	0.5545	0.055305	1	1	1	1		S593; S30	0.0693667	0.346092	0.699534	0.816612	0.671413	1	0.962121	0.00212502	FC
PMI_026161; Pmi_557820_no_annot|m.10251	S691:S697; S384:S390	XP_022086720.1 nascent polypeptide-associated complex subunit alpha, muscle-specific form-like isoform X1 [Acanthaster planci] (id=58.23%; len=1099; e=0.00E+00) ; no_annot	LPKEAISPIEVSS,SPIEVSSPKEVSS; LPKEAISPIEVSS,SPIEVSSPKEVSS	2,3	3.559	0.72	0.081806	1	4	3	5		S691:S697; S384:S390	0.0943534	0.535871	0.841252	0.773906	0.704581	1	0.994173	5.08362e-05	FC
Pmi_639800_PEX3_MACFA_Peroxisomal_biogenesis_factor_3|m.22654; 44096|m.29681	S228; S59	PEX3_MACFA_Peroxisomal_biogenesis_factor_3; XP_022107142.1 peroxisomal biogenesis factor 3-like [Acanthaster planci] (id=89.00%; len=200; e=1.16E-123)	KLDEQGSGIECTI; KLDEQGSGIECTI	3	3.187	0.6687	0.333789	1	1	1	1		S228; S59	0.123784	0.382048	0.756155	0.765033	0.826243	1	0.985211	0.000326462	FC
PMI_008107; PMI_006086; 23877|m.18203	S333; S334; S76	XP_022083499.1 WD repeat-containing protein 48-like [Acanthaster planci] (id=92.43%; len=647; e=0.00E+00) ; XP_022083499.1 WD repeat-containing protein 48-like [Acanthaster planci] (id=92.47%; len=677; e=0.00E+00) ; XP_022083499.1 WD repeat-containing protein 48-like [Acanthaster planci] (id=85.54%; len=166; e=3.22E-101)	GDDARNSGDYDNA; GDDARNSGDYDNA; GDDARNSGDYDNA	3,4,5	4.522	0.7851	0.036478	1	2	4	3	2	S333; S334; S76	0.0818599	0.187016	0.673457	0.725698	0.787354	1	0.981042	0.000535724	FC	0.198512	0.281719	0.925965	0.0330306	0.00353449
Pmi_592130_K0232_MOUSE_Uncharacterized_protein_KIAA0232|m.14095	S536	K0232_MOUSE_Uncharacterized_protein_KIAA0232	KEPWERSPLKMNA	3	1.919	0.3544	0.89195	1	1	1	1		S536	0.11855	0.826686	0.896385	0.825063	0.72787	0.996889	0.98607	0.000289704	FC
20284|m.14840; 20285|m.14842; Pmi_617010_IBTK_XENLA_Inhibitor_of_Bruton_tyrosine_kinase|m.17910	S127:S129; S127:S129; S316:S318	XP_022089803.1 inhibitor of Bruton tyrosine kinase-like [Acanthaster planci] (id=68.05%; len=266; e=2.59E-103) ; XP_022089803.1 inhibitor of Bruton tyrosine kinase-like [Acanthaster planci] (id=69.47%; len=524; e=0.00E+00) ; IBTK_XENLA_Inhibitor_of_Bruton_tyrosine_kinase	STGKRKSLSFSES,GKRKSLSFSESGE; STGKRKSLSFSES,GKRKSLSFSESGE; STGKRKSLSFSES,GKRKSLSFSESGE	2,3	1.839	0.6126	0.382559	0.99998	3	1	1	1	S127:S129; S127:S129; S316:S318	0.121038	0.684628	0.951429	0.860267	0.812752	0.994089	0.987798	0.000222416	FC	0.136861	0.351344	0.928727	0.0227561	0.00352581
PMI_004395; Pmi_619272_no_annot|m.18354; 25033|m.18928	S1168; S295; S282	XP_022100951.1 BMP-2-inducible protein kinase-like isoform X2 [Acanthaster planci] (id=80.54%; len=663; e=0.00E+00) ; no_annot; XP_022100951.1 BMP-2-inducible protein kinase-like isoform X2 [Acanthaster planci] (id=86.72%; len=399; e=0.00E+00)	NPTPPISPTEMEH; NPTPPISPTEMEH; NPTPPISPTEMEH	3,4,5	5.604	0.7316	0.000832	1	9	8	8	6	S1168; S295; S282	0.071937	0.432314	0.742889	0.762713	0.740808	1	0.992698	7.97857e-05	FC	0.253602	0.357748	0.976291	0.00437309	1.32756e-05
PMI_005722; Pmi_648790_CDAN1_MOUSE_Codanin-1|m.24943	S136; S329	XP_022105313.1 codanin-1-like [Acanthaster planci] (id=54.46%; len=1021; e=0.00E+00) ; CDAN1_MOUSE_Codanin-1	FNRALPSPDATPS; FNRALPSPDATPS	3	4.52	0.7015	0.047895	1	1	1	1	3	S136; S329	0.0646993	0.159787	0.187841	0.55573	0.377838	1	0.942329	0.00489295	FC	0.44938	0.770066	0.917356	0.000487564	0.00529021
PMI_014280; PMI_015627	S791; S731	XP_022103206.1 metastasis-associated protein MTA3-like isoform X2 [Acanthaster planci] (id=81.95%; len=798; e=0.00E+00) ; XP_022103206.1 metastasis-associated protein MTA3-like isoform X2 [Acanthaster planci] (id=90.11%; len=738; e=0.00E+00)	MVSKVRSAETIVI; MVSKVRSAETIVI	2	1.776	0.59	0.193109	1	1	1	1	1	S791; S731	0.0850731	0.121552	0.959897	0.930799	0.731357	0.983417	0.990199	0.000143631	FC	0.216953	0.274202	0.959122	0.0580449	9.99976e-05
Pmi_659212_RFA1_HUMAN_Replication_protein_A_70_kDa_DNA-binding_subunit|m.28031	T179	RFA1_HUMAN_Replication_protein_A_70_kDa_DNA-binding_subunit	GGAGPSTGMMSPP	4	4.119	0.6604	0.375538	0.995	2	1	1		T179	0.0999672	0.514978	0.905767	0.77133	0.773391	0.965402	0.854286	0.030302	FC
PMI_015143; 40442|m.27723	T255:T261; T99:T105	XP_022086238.1 transcription initiation factor TFIID subunit 1-like [Acanthaster planci] (id=80.26%; len=456; e=0.00E+00) ; XP_022086238.1 transcription initiation factor TFIID subunit 1-like [Acanthaster planci] (id=83.06%; len=124; e=1.62E-57)	RRKRRPTASSEGT,TASSEGTEQVSSP; RRKRRPTASSEGT,TASSEGTEQVSSP	3	2.959	0.3902	0.067967	0.99624	1	1	1	1	T255:T261; T99:T105	0.0977618	0.431121	0.933193	0.918804	0.743817	0.945473	0.996143	2.22895e-05	FC	0.124599	0.261	0.981815	0.00125772	1.50856e-05
14498|m.9445; Pmi_597720_NAA10_MOUSE_N-alpha-acetyltransferase_10|m.14853	S182; S182	XP_022101233.1 N-alpha-acetyltransferase 11-like [Acanthaster planci] (id=89.50%; len=219; e=1.42E-140) ; NAA10_MOUSE_N-alpha-acetyltransferase_10	ADGSQESPDAKAL; ADGSQESPDAKAV	3,4,5	3.537	0.6495	0.029132	1	5	7	4	4	S182; S182	0.0989248	0.415505	0.896349	0.700685	0.743089	0.992303	0.938132	0.00562313	FC	0.399874	0.427978	0.970819	0.326942	9.24667e-06
Pmi_650292_GPBP1_MOUSE_Vasculin|m.25354; 62779|m.41521; 62780|m.41523; 62781|m.41525; PMI_010747; 62787|m.41534; PMI_023155; 62784|m.41530	S265; S253; S253; S264; S717; S264; S751; S225	GPBP1_MOUSE_Vasculin; XP_022097147.1 mucin-12-like isoform X1 [Acanthaster planci] (id=64.91%; len=322; e=1.69E-117) ; XP_022097147.1 mucin-12-like isoform X1 [Acanthaster planci] (id=65.22%; len=322; e=1.30E-118) ; XP_022097147.1 mucin-12-like isoform X1 [Acanthaster planci] (id=63.83%; len=329; e=1.57E-118) ; XP_022097147.1 mucin-12-like isoform X1 [Acanthaster planci] (id=60.47%; len=774; e=0.…	NFYPVFSPVKDVP; NFYPVFSPVKDVP; NFYPVFSPVKDVP; NFYPVFSPVKDVP; NFYPVFSPVKDVP; NFYPVFSPVKDVP; NFYPVFSPVKDVP; NFYPVFSPVKDVP	3,4,5	4.04	0.7512	0.001311	1	3	1	2		S265; S253; S253; S264; S717; S264; S751; S225	0.0773053	0.706724	0.875843	0.807065	0.763596	0.990678	0.879012	0.0210717	FC
PMI_022298	S1308	XP_022091168.1 calmodulin-regulated spectrin-associated protein 1-like isoform X2 [Acanthaster planci] (id=74.00%; len=1965; e=0.00E+00)	DSSPRRSESPQSI	3	2.901	0.5765	0.50184	0.99854	1	1	1		S1308	0.109349	0.837238	0.90292	0.789428	0.756055	0.962998	0.949831	0.00371231	FC
Pmi_656052_UBP10_CHICK_Ubiquitin_carboxyl-terminal_hydrolase_10|m.27038; 76455|m.51040; PMI_001965; 76457|m.51044	S351; S448; S508; S423	UBP10_CHICK_Ubiquitin_carboxyl-terminal_hydrolase_10; XP_022084105.1 ubiquitin carboxyl-terminal hydrolase 10-like [Acanthaster planci] (id=74.88%; len=856; e=0.00E+00) ; XP_022084105.1 ubiquitin carboxyl-terminal hydrolase 10-like [Acanthaster planci] (id=89.06%; len=256; e=8.03E-147) ; XP_022084105.1 ubiquitin carboxyl-terminal hydrolase 10-like [Acanthaster planci] (id=74.88%; len=856; e=0.00E…	SNAQQLSPKECQP; SNAQQLSPKECQP; SNAQQLSPKECQP; SNAQQLSPKECQP	2,3,4,5	4.192	0.6912	0.005019	1	7	7	8	8	S351; S448; S508; S423	0.0966353	0.239644	0.641665	0.708971	0.700045	1	0.997484	9.4837e-06	FC	0.171788	0.212131	0.955604	0.265606	0.000312296
61234|m.40564	S76	XP_022104164.1 eukaryotic translation initiation factor 4 gamma 3-like isoform X7 [Acanthaster planci] (id=78.52%; len=284; e=4.87E-139)	EPVKPESPAPELS	3,4,5	4.153	0.6942	0.095142	1	5	4	2		S76	0.12222	0.292694	0.79865	0.964496	0.918718	0.980923	0.981082	0.000533458	FC
Pmi_651760_RPC3_BOVIN_DNA-directed_RNA_polymerase_III_subunit_RPC3|m.25764; PMI_008594; 43578|m.29361	S225; S192; S210	RPC3_BOVIN_DNA-directed_RNA_polymerase_III_subunit_RPC3; XP_022111431.1 DNA-directed RNA polymerase III subunit RPC3-like isoform X1 [Acanthaster planci] (id=74.49%; len=486; e=0.00E+00) ; XP_022111431.1 DNA-directed RNA polymerase III subunit RPC3-like isoform X1 [Acanthaster planci] (id=85.48%; len=420; e=0.00E+00)	TLKRKRSTEDGDP; TSKRKRSTEDGDP; TLKRKRSTEDGDP	3,4	2.074	0.561	0.29208	0.99998	1	2	1		S225; S192; S210	0.090398	0.367926	0.812808	0.867372	0.785469	0.919751	0.823171	0.0441383	FC
PMI_007291; 19958|m.14481	S479; S426	XP_022098951.1 protein cramped-like isoform X1 [Acanthaster planci] (id=77.17%; len=1165; e=0.00E+00) ; XP_022098954.1 protein cramped-like isoform X2 [Acanthaster planci] (id=82.67%; len=606; e=0.00E+00)	SNHRRKSEDSEPM; SNHRRKSEDSEPM	3,4	2.882	0.6602	0.075725	1	5	4	3	4	S479; S426	0.0914975	0.81881	0.89472	0.876407	0.882254	1	0.979246	0.000641609	FC	0.188966	0.450937	0.934069	0.0047302	0.0024468
PMI_021957; 17972|m.12532; PMI_028208; Pmi_630500_RABE1_HUMAN_Rab_GTPase-binding_effector_protein_1|m.20577	S262; S51; S101; S279	XP_022109674.1 rab GTPase-binding effector protein 1-like [Acanthaster planci] (id=74.02%; len=689; e=0.00E+00) ; XP_022109674.1 rab GTPase-binding effector protein 1-like [Acanthaster planci] (id=91.41%; len=198; e=4.41E-116) ; XP_022109674.1 rab GTPase-binding effector protein 1-like [Acanthaster planci] (id=83.99%; len=281; e=7.23E-143) ; RABE1_HUMAN_Rab_GTPase-binding_effector_protein_1	HKIRKYSLDTLGS; HKIRKYSLDTLGS; HKIRKYSLDTLGS; HKIRKYSLDTLGS	2,3	3.2	0.5716	0.432904	0.99999	2	1	1		S262; S51; S101; S279	0.0932738	0.189002	0.788993	0.76206	0.809694	1	0.906251	0.0127713	FC
69279|m.46212; PMI_002224; 69278|m.46208; 69272|m.46199	S635:T644; S635:T644; S668:T677; S668:T677	XP_022104946.1 uncharacterized protein LOC110986919 isoform X2 [Acanthaster planci] (id=58.59%; len=1961; e=0.00E+00) ; XP_022104946.1 uncharacterized protein LOC110986919 isoform X2 [Acanthaster planci] (id=63.86%; len=2482; e=0.00E+00) ; XP_022104937.1 uncharacterized protein LOC110986919 isoform X1 [Acanthaster planci] (id=45.75%; len=1246; e=0.00E+00) ; XP_022104937.1 uncharacterized protein …	IEKRRLSESPKDF,PKDFAETSTASGR; IEKRRLSESPKDF,PKDFAETSTASGR; IEKRRLSESPKDF,PKDFAETSTASGR; IEKRRLSESPKDF,PKDFAETSTASGR	3	1.895	0.5245	0.421014	0.96149	1	1	1	1	S635:T644; S635:T644; S668:T677; S668:T677	0.0851215	0.43581	0.938094	0.795093	0.773123	0.962805	0.938271	0.00559812	FC	0.289929	0.465431	0.988355	0.00901557	1.31793e-06
21092|m.15723; Pmi_670100_FRY_HUMAN_Protein_furry_homolog|m.31750; PMI_005374; PMI_022901	S790; S2314; S197; S180	XP_022079670.1 LOW QUALITY PROTEIN: protein furry homolog-like [Acanthaster planci] (id=88.79%; len=972; e=0.00E+00) ; FRY_HUMAN_Protein_furry_homolog; XP_022079670.1 LOW QUALITY PROTEIN: protein furry homolog-like [Acanthaster planci] (id=80.93%; len=367; e=2.22E-173) ; XP_022079670.1 LOW QUALITY PROTEIN: protein furry homolog-like [Acanthaster planci] (id=76.15%; len=369; e=1.58E-157)	TKEVVTSPIFEIK; TKEVVTSPIFEIK; TKEVVTSPIFEIK; TKEVVTSPIFEIK	2,3	3.265	0.557	0.063678	1	5	4	6	5	S790; S2314; S197; S180	0.0785282	0.356751	0.806319	0.805197	0.841718	1	0.980436	0.000570379	FC	0.0530552	0.141468	0.975408	0.00754767	0.00024148
PMI_022185	S222	XP_022104396.1 mitogen-activated protein kinase kinase kinase 2-like isoform X2 [Acanthaster planci] (id=79.94%; len=618; e=0.00E+00)	SRRPQLSPSLMNP	2,3,4	3.537	0.6286	0.051004	1	7	6	8	9	S222	0.0962835	0.519759	0.893503	0.893373	0.894141	1	0.973666	0.00103113	FC	0.20494	0.278393	0.970689	0.0102055	1.9023e-05
PMI_022724; 24575|m.18660; Pmi_652760_EST1A_MOUSE_Telomerase-binding_protein_EST1A|m.26047	S298; S260; S427	XP_022110508.1 telomerase-binding protein EST1A-like [Acanthaster planci] (id=65.30%; len=729; e=0.00E+00) ; XP_022110508.1 telomerase-binding protein EST1A-like [Acanthaster planci] (id=64.19%; len=525; e=1.97E-179) ; EST1A_MOUSE_Telomerase-binding_protein_EST1A	LLDLQVSPPDKGV; LLDLQVSPPDKGV; LLDLQVSPPDKGV	2,3,4,5	3.079	0.6429	0.123499	1	2	2	6	2	S298; S260; S427	0.0878892	0.559961	0.797126	0.907571	0.673138	0.946615	0.959046	0.00248153	FC	0.427274	0.477897	0.981823	0.0934436	3.84886e-06
PMI_000785; PMI_022096	S69; S69	XP_022095045.1 ubiquitin carboxyl-terminal hydrolase MINDY-2-like isoform X2 [Acanthaster planci] (id=75.00%; len=392; e=0.00E+00) ; XP_022095045.1 ubiquitin carboxyl-terminal hydrolase MINDY-2-like isoform X2 [Acanthaster planci] (id=82.38%; len=454; e=0.00E+00)	GTPTDTSPRSQPA; GTPTDTSPRSQPA	2,3	4.6	0.7876	0.00194	0.99999	5	4	5		S69; S69	0.112024	0.523951	0.879554	0.772507	0.741053	0.982418	0.943348	0.00472327	FC
19093|m.13609; Pmi_642570_FAM21_RAT_WASH_complex_subunit_FAM21|m.23341	S139; S710	XP_022103330.1 WASH complex subunit 2A-like isoform X2 [Acanthaster planci] (id=79.85%; len=268; e=5.07E-109) ; FAM21_RAT_WASH_complex_subunit_FAM21	DMKKKASGGLFDD; DMKKKASGGLFDD	4,5	7.129	0.7656	0.340818	1	1	3	4		S139; S710	0.0746239	0.0835774	0.882456	0.898087	0.785844	0.997783	0.990926	0.000123132	FC
PMI_001303	S558	XP_022109796.1 uncharacterized protein LOC110989599 isoform X1 [Acanthaster planci] (id=62.41%; len=713; e=0.00E+00)	QKRPPVSPLPPKA	2,3,4,5	4.181	0.6817	0.107395	1	10	9	8	6	S558	0.08894	0.764895	0.92235	0.91718	0.779922	1	0.98977	0.000156443	FC	0.0918015	0.203974	0.963308	0.0102182	0.000539511
70405|m.46991; PMI_026153	S143; S151	XP_022098352.1 sperm flagellar protein 1-like [Acanthaster planci] (id=82.10%; len=257; e=1.41E-158) ; XP_022098352.1 sperm flagellar protein 1-like [Acanthaster planci] (id=67.51%; len=277; e=2.06E-124)	NKSDKLSPDGYYG; NKSDKLSPDGYYG	2,3	1.909	0.6637	0.140374	1	1	3	1		S143; S151	0.0944951	0.312817	0.792277	0.665639	0.679206	1	0.905422	0.0129946	FC
PMI_016516; PMI_005043	S234; S347	XP_022091987.1 lisH domain and HEAT repeat-containing protein KIAA1468 homolog [Acanthaster planci] (id=83.36%; len=1118; e=0.00E+00) ; XP_022091987.1 lisH domain and HEAT repeat-containing protein KIAA1468 homolog [Acanthaster planci] (id=84.61%; len=1215; e=0.00E+00)	TSTPGVSPIGTPH; TSTPGVSPIGTPH	3,4	2.259	0.6029	0.265714	1	2	3	2	1	S234; S347	0.0975623	0.0786304	0.134353	0.796324	0.580768	1	0.99603	2.36131e-05	FC	0.929457	0.867833	0.419438	0.221268	0.00284727
Pmi_600410_DZI1L_DANRE_Zinc_finger_protein_DZIP1L|m.15218	S454:S461	DZI1L_DANRE_Zinc_finger_protein_DZIP1L	LKSRPKSPAKPPP,PAKPPPSPTAKKA	4,5	1.463	0.5345	0.024103	0.99413	1	1	1		S454:S461	0.105934	0.713833	0.949625	0.718195	0.799143	1	0.992749	7.86706e-05	FC
PMI_028745	S211	XP_022085606.1 unconventional myosin-XVIIIa-like isoform X3 [Acanthaster planci] (id=86.11%; len=504; e=0.00E+00)	FEPGASSPGPGEK	3,4	6.743	0.7972	0.321591	1	2	2	2	3	S211	0.0872694	0.353205	0.901068	0.918169	0.732103	0.999114	0.995868	2.55698e-05	FC	0.112954	0.151899	0.908927	0.40019	0.00323052
4229|m.2325; PMI_026980	S98; S664	XP_022093589.1 MKL/myocardin-like protein 1 isoform X2 [Acanthaster planci] (id=79.81%; len=208; e=1.31E-91) ; XP_022093588.1 MKL/myocardin-like protein 1 isoform X1 [Acanthaster planci] (id=84.82%; len=988; e=0.00E+00)	GKTTTLSPQQLQP; GKTTTLSPQQLQP	4	4.892	0.7086	0.105086	0.99506	1	1	2	2	S98; S664	0.0720902	0.902873	0.661336	0.392738	0.848948	0.917141	0.845847	0.0338132	FC	0.109765	0.266647	0.823575	0.00359279	0.0130874
80695|m.54241; 80694|m.54238; 80698|m.54249; Pmi_668021_BAZ1B_HUMAN_Tyrosine-protein_kinase_BAZ1B|m.30901	S255; S255; S269; S269	XP_022095000.1 tyrosine-protein kinase BAZ1B-like isoform X5 [Acanthaster planci] (id=79.21%; len=991; e=0.00E+00) ; XP_022095000.1 tyrosine-protein kinase BAZ1B-like isoform X5 [Acanthaster planci] (id=79.52%; len=991; e=0.00E+00) ; XP_022094996.1 tyrosine-protein kinase BAZ1B-like isoform X2 [Acanthaster planci] (id=79.71%; len=1104; e=0.00E+00) ; BAZ1B_HUMAN_Tyrosine-protein_kinase_BAZ1B	YEDISLSPYKTTY; YEDISLSPYKTTY; YEDISLSPYKTTY; YEDISLSPYKTTY	2,3,4	3.207	0.5884	0.245558	1	3	5	4	1	S255; S255; S269; S269	0.104821	0.419008	0.879355	0.809394	0.684537	0.985341	0.826106	0.0427296	FC	0.251589	0.248063	0.843733	0.959953	0.0160915
PMI_004458; PMI_019847; Pmi_663710_L2GL2_PONAB_Lethal(2)_giant_larvae_protein_homolog_2|m.29446; 24120|m.18347	S369:S376; S365:S372; S670:S677; S391:S398	XP_022084945.1 lethal(2) giant larvae protein homolog 1-like isoform X7 [Acanthaster planci] (id=83.44%; len=906; e=0.00E+00) ; XP_022084939.1 lethal(2) giant larvae protein homolog 1-like isoform X2 [Acanthaster planci] (id=73.74%; len=438; e=0.00E+00) ; L2GL2_PONAB_Lethal(2)_giant_larvae_protein_homolog_2; XP_022084944.1 lethal(2) giant larvae protein homolog 1-like isoform X6 [Acanthaster plan…	RKRRQHSGPAAGG,GPAAGGSPKKEKA; RKRRQHSGPAAGG,GPAAGGSPKKEKA; RKRRQHSGPAAGG,GPAAGGSPKKEKA; RKRRQHSGPAAGG,GPAAGGSPKKEKA	2,3,5	2.843	0.694	0.082592	1	5	7	6	1	S369:S376; S365:S372; S670:S677; S391:S398	0.0872589	0.102293	0.217201	0.307916	0.489268	1	0.994221	4.99981e-05	FC	0.660766	0.571468	0.891138	0.513128	0.0507274
Pmi_648520_PDE4D_MOUSE_cAMP-specific_3p,5p-cyclic_phosphodiesterase_4D|m.24877; 5349|m.2972	S133; S42	PDE4D_MOUSE_cAMP-specific_3p,5p-cyclic_phosphodiesterase_4D; XP_022087256.1 cAMP-specific 3',5'-cyclic phosphodiesterase 4C-like isoform X11 [Acanthaster planci] (id=93.90%; len=164; e=3.23E-101)	SNFNRQSPKDKLH; SNFNRQSPKDKLH	3,4,5	2.883	0.5588	0.077306	1	5	3	3	3	S133; S42	0.10286	0.307637	0.874643	0.698185	0.781092	1	0.955926	0.00287101	FC	0.11157	0.167371	0.88442	0.0607235	0.00418004
Pmi_385140_SZT2_HUMAN_Protein_SZT2|m.2486; PMI_010197; PMI_027399; 88733|m.58615	S69; S70; S54; S69	SZT2_HUMAN_Protein_SZT2; XP_022100206.1 KICSTOR complex protein SZT2-like isoform X1 [Acanthaster planci] (id=72.55%; len=153; e=3.03E-62) ; XP_022100207.1 KICSTOR complex protein SZT2-like isoform X2 [Acanthaster planci] (id=62.74%; len=153; e=5.20E-49) ; XP_022100207.1 KICSTOR complex protein SZT2-like isoform X2 [Acanthaster planci] (id=88.44%; len=147; e=1.89E-78)	SRIDKPSLDDDDD; SRIDKPSLDDDDD; SRIDKPSLDDDDD; SRIDKPSLDDDDD	3,4	3.934	0.7072	0.002572	1	4	3	3	6	S69; S70; S54; S69	0.10925	0.410177	0.876819	0.846409	0.74125	0.966103	0.990983	0.000121599	FC	0.165876	0.315784	0.98191	7.28766e-05	1.57536e-05
11104|m.6867; Pmi_380060_WDR7_MOUSE_WD_repeat-containing_protein_7|m.2400; PMI_010453	S139:S144; S139:S144; S99:S104	XP_022084868.1 WD repeat-containing protein 7-like isoform X1 [Acanthaster planci] (id=87.56%; len=201; e=5.66E-93) ; WDR7_MOUSE_WD_repeat-containing_protein_7; XP_022084877.1 WD repeat-containing protein 7-like isoform X2 [Acanthaster planci] (id=90.88%; len=702; e=0.00E+00)	NPSKTPSPSRMSP,PSPSRMSPDPSSI; NPSKTPSPSRMSP,PSPSRMSPDPSSI; NPSKTPSPSRMSP,PSPSRMSPDPSSI	3,4	3.233	0.4644	0.075908	0.99999	1	1	2	2	S139:S144; S139:S144; S99:S104	0.0679495	0.432216	0.915926	0.881481	0.822954	0.987959	0.983288	0.00041661	FC	0.148083	0.166402	0.988646	0.407856	8.85803e-06
Pmi_628860_no_annot|m.20265	S558:S561	no_annot	ALKKDDSRDSDLD,KDDSRDSDLDSGS	3,4,5	2.983	0.7224	0.063805	1	3	2	2		S558:S561	0.10527	0.100121	0.706481	0.722824	0.726593	1	0.980782	0.000550425	FC
Pmi_555260_no_annot|m.10039; 7938|m.4657	S172; S50	no_annot; XP_022089714.1 uncharacterized protein LOC110978760 [Acanthaster planci] (id=44.83%; len=145; e=3.08E-20)	SSQGPVSPTELLK; SSQGPVSPTELLK	3,4,5	5.565	0.7348	0.320896	0.99999	2	3	3		S172; S50	0.114826	0.557695	0.46895	0.793758	0.641886	1	0.849891	0.0321078	FC
Pmi_655150_MACOI_BOVIN_Macoilin|m.26721	S643	MACOI_BOVIN_Macoilin	NYSGSGSPISGTP	3,4	5.961	0.8187	0.025737	1	9	10	8	5	S643	0.161386	0.70888	0.798434	0.741131	0.876102	0.992526	0.850381	0.031904	FC	0.558633	0.619895	0.908388	0.295389	0.012845
22247|m.16901; PMI_015212; Pmi_653053_KAT5_PONAB_Histone_acetyltransferase_KAT5|m.26138	T86; T277; T95	XP_022106082.1 histone acetyltransferase KAT5-like [Acanthaster planci] (id=91.55%; len=509; e=0.00E+00) ; XP_022106082.1 histone acetyltransferase KAT5-like [Acanthaster planci] (id=92.42%; len=475; e=0.00E+00) ; KAT5_PONAB_Histone_acetyltransferase_KAT5	PKKDAKTPVKDSS; PKKDAKTPVKDSS; PKKDAKTPVKDSS	3	1.299	0.455	0.990963	1	1	1	1		T86; T277; T95	0.109161	0.806992	0.883629	0.787681	0.760058	1	0.950945	0.00355061	FC
58401|m.38699; PMI_012647; Pmi_616942_PASK_MOUSE_PAS_domain-containing_serine/threonine-protein..CUT|m.17916	T260; T845; T517	XP_022092769.1 uncharacterized protein LOC110980418 isoform X3 [Acanthaster planci] (id=79.18%; len=754; e=0.00E+00) ; XP_022092771.1 uncharacterized protein LOC110980418 isoform X4 [Acanthaster planci] (id=82.04%; len=1342; e=0.00E+00) ; PASK_MOUSE_PAS_domain-containing_serine/threonine-protein..CUT	GNRVDSTPPGVPK; GNRVDSTPPGVPK; GNRVDSTPPGVPK	2,3	2.154	0.5924	0.01393	0.99803	2	2	1	4	T260; T845; T517	0.0972692	0.860888	0.941265	0.867928	0.768429	1	0.995793	2.65094e-05	FC	0.176952	0.273991	0.970324	0.00132728	5.15152e-05
19351|m.13865	S282	XP_022112109.1 uncharacterized protein LOC110991183 [Acanthaster planci] (id=83.03%; len=324; e=4.49E-176)	EVCSPTSPRMESG	2,3	4.964	0.7851	0.905369	1	2	1	2	2	S282	0.0930857	0.793964	0.565869	0.63635	0.583559	1	0.98985	0.000154007	FC	0.432454	0.655276	0.976131	0.00747562	8.895e-05
PMI_000555	S73	XP_009063333.1 hypothetical protein LOTGIDRAFT_195511 [Lottia gigantea] (id=82.61%; len=69; e=3.92E-32)	AELQTASA-----	2	2.983	0.7117	0.598241	1	4	3	2	1	S73	0.110355	0.416013	0.955634	0.840677	0.711489	0.982411	0.995352	3.23534e-05	FC	0.186178	0.232557	0.990375	0.113704	6.8781e-08
Pmi_608811_MYO1E_MOUSE_Unconventional_myosin-Ie|m.16560; PMI_017967; PMI_017390	S564; S351; S92	MYO1E_MOUSE_Unconventional_myosin-Ie; XP_022110259.1 unconventional myosin-Ie-like isoform X1 [Acanthaster planci] (id=84.98%; len=466; e=0.00E+00) ; XP_022110260.1 unconventional myosin-Ie-like isoform X2 [Acanthaster planci] (id=83.09%; len=207; e=3.14E-100)	RSSRRMSGDHPSL; RSSRRMSGDHPSL; RSSRRMSGDHPSL	2,3,4	2.138	0.6594	0.043369	1	21	24	23	8	S564; S351; S92	0.0962161	0.428252	0.721145	0.694656	0.804108	1	0.928605	0.00746389	FC	0.24468	0.414673	0.978447	6.04859e-05	1.16095e-05
Pmi_653002_DOP1_MOUSE_Protein_dopey-1|m.26136; PMI_008692; PMI_023036	S933; S933; S985	DOP1_MOUSE_Protein_dopey-1; XP_022089795.1 protein dopey-1-like isoform X1 [Acanthaster planci] (id=89.06%; len=2597; e=0.00E+00) ; XP_022089795.1 protein dopey-1-like isoform X1 [Acanthaster planci] (id=88.69%; len=1256; e=0.00E+00)	LPNPPNSPKTDSG; LPNPPNSPKTDSG; LPNPPNSPKTDSG	2,3	2.341	0.6022	0.022976	1	5	6	7	8	S933; S933; S985	0.0906417	0.622617	0.938972	0.898641	0.735683	0.992108	0.982735	0.000444558	FC	0.101589	0.188213	0.974886	0.00131438	0.000346617
Pmi_668450_RFC1_MOUSE_Replication_factor_C_subunit_1|m.31051; 82277|m.55277; PMI_012646; PMI_004129; 82276|m.55273	S370; S370; S304; S108; S357	RFC1_MOUSE_Replication_factor_C_subunit_1; XP_022092744.1 replication factor C subunit 1-like isoform X1 [Acanthaster planci] (id=81.36%; len=1100; e=0.00E+00) ; XP_022092744.1 replication factor C subunit 1-like isoform X1 [Acanthaster planci] (id=69.37%; len=542; e=0.00E+00) ; XP_022092746.1 replication factor C subunit 1-like isoform X3 [Acanthaster planci] (id=75.84%; len=890; e=0.00E+00) ; X…	SPVGGDSAEKKKG; SPVGGDSAEKKKG; SPVGGDSAEKKKG; SPVGGDSAEKKKG; SPVGGDSAEKKKG	2,3,4	2.471	0.5509	0.038732	1	2	3	4	1	S370; S370; S304; S108; S357	0.0952588	0.800714	0.134365	0.341555	0.304531	1	0.987341	0.000239359	FC	0.0808617	0.308465	0.917036	0.0123278	0.00337723
77666|m.52092; 77661|m.52082; 77652|m.52054; 77667|m.52100; 77660|m.52074	S550:S557; S18:S25; S550:S557; S639:S646; S639:S646	XP_022097945.1 vesicle-associated protein-like, partial [Acanthaster planci] (id=67.66%; len=535; e=6.52E-175) ; XP_022097947.1 neuroblast differentiation-associated protein AHNAK-like [Acanthaster planci] (id=42.76%; len=856; e=1.78E-125) ; XP_022097945.1 vesicle-associated protein-like, partial [Acanthaster planci] (id=67.66%; len=535; e=2.93E-174) ; XP_022097945.1 vesicle-associated protein-li…	GVKGGISGPDVDV,GPDVDVSPPTIGG; GVKGGISGPDVDV,GPDVDVSPPTIGG; GVKGGISGPDVDV,GPDVDVSPPTIGG; GVKGGISGPDVDV,GPDVDVSPPTIGG; GVKGGISGPDVDV,GPDVDVSPPTIGG	2,3	3.088	0.6798	0.015578	1	1	2	1		S550:S557; S18:S25; S550:S557; S639:S646; S639:S646	0.117713	0.310886	0.678892	0.61337	0.651476	1	0.98442	0.000362231	FC
PMI_002958; 19667|m.14179	S1507; S25	XP_022104691.1 LOW QUALITY PROTEIN: uncharacterized protein LOC110986790 [Acanthaster planci] (id=66.12%; len=3096; e=0.00E+00) ; XP_022104691.1 LOW QUALITY PROTEIN: uncharacterized protein LOC110986790 [Acanthaster planci] (id=80.46%; len=389; e=0.00E+00)	PDEEERSPVKSKP; PDEEERSPVKSKP	3	1.621	0.4915	0.193937	1	1	1	1		S1507; S25	0.094889	0.551886	0.650529	0.521719	0.700098	1	0.982553	0.000453959	FC
PMI_004473; 26115|m.19536; PMI_007113	S245; S355; S382	XP_022095652.1 protein phosphatase 1 regulatory subunit 36-like [Acanthaster planci] (id=72.41%; len=319; e=6.61E-153) ; XP_022095652.1 protein phosphatase 1 regulatory subunit 36-like [Acanthaster planci] (id=88.59%; len=377; e=0.00E+00) ; XP_022095652.1 protein phosphatase 1 regulatory subunit 36-like [Acanthaster planci] (id=78.75%; len=433; e=0.00E+00)	SQFGTPSPDHGGL; SQFGTPSPDHGGL; SQFGTPSPDHGGL	3	2.416	0.4826	0.743222	1	2	2	1		S245; S355; S382	0.115883	0.668649	0.885179	0.882584	0.809709	0.938404	0.876809	0.0218294	FC
PMI_025050	S392	XP_022092220.1 cysteine protease ATG4D-like isoform X2 [Acanthaster planci] (id=71.84%; len=664; e=0.00E+00)	PHWNGNSPKAEEP	4	1.777	0.3537	0.143429	1	1	1	1		S392	0.106327	0.425682	0.932049	0.787829	0.825027	1	0.986774	0.000261226	FC
Pmi_653522_CDC6_MOUSE_Cell_division_control_protein_6_homolog|m.26282; 63669|m.42095; 63670|m.42096; PMI_022226	S69; S69; S69; S69	CDC6_MOUSE_Cell_division_control_protein_6_homolog; BAH83663.1 cell division cycle 6 [Patiria pectinifera] (id=95.79%; len=618; e=0.00E+00) ; BAH83663.1 cell division cycle 6 [Patiria pectinifera] (id=95.47%; len=618; e=0.00E+00) ; BAH83663.1 cell division cycle 6 [Patiria pectinifera] (id=92.56%; len=618; e=0.00E+00)	TPETSLSPQRVRS; TPETSLSPQRVRS; TPETSLSPQRVRS; TPETSLSPQRVRS	2	1.77	0.3303	0.224342	0.99999	1	1	1		S69; S69; S69; S69	0.0863297	0.0994167	0.185684	0.338769	0.40004	1	0.995821	2.61539e-05	FC
20028|m.14551; Pmi_629761_RB_CHICK_Retinoblastoma-associated_protein|m.20438; PMI_012593	S262; S538; S216	XP_022095249.1 retinoblastoma-associated protein-like [Acanthaster planci] (id=85.81%; len=303; e=0.00E+00) ; RB_CHICK_Retinoblastoma-associated_protein; XP_022095249.1 retinoblastoma-associated protein-like [Acanthaster planci] (id=75.57%; len=655; e=0.00E+00)	TTLHIASPGSIST; TTLHIASPGSIST; TTLHIASPGSIST	3	2.084	0.5754	0.107943	0.99999	1	1	1		S262; S538; S216	0.123129	0.384956	0.594214	0.437047	0.625485	1	0.890647	0.0172832	FC
PMI_027430	S8	XP_022109351.1 rho guanine nucleotide exchange factor 12-like [Acanthaster planci] (id=69.33%; len=150; e=3.81E-62)	KNQSPLSPPHQGN	3,4	1.897	0.5721	1.61329	0.99996	1	2	1		S8	0.104166	0.643327	0.860236	0.729895	0.767868	1	0.944561	0.00452502	FC
19607|m.14129	S333	XP_022098884.1 ubinuclein-1-like isoform X1 [Acanthaster planci] (id=81.18%; len=473; e=0.00E+00)	PSSAKTSPQETLN	2,3,4	4.364	0.6574	0.323646	1	4	4	2	4	S333	0.103174	0.566169	0.843122	0.793219	0.71559	0.993022	0.992048	9.46084e-05	FC	0.286864	0.371439	0.967011	0.0085042	1.87817e-05
Pmi_625210_UBN2_HUMAN_Ubinuclein-2|m.19492	S604	UBN2_HUMAN_Ubinuclein-2	PTSAKTSPQETLN	2,3,4	4.824	0.6574	0.323646	1	3	3	2	4	S604	0.0966865	0.564122	0.834293	0.814543	0.730045	0.999969	0.998478	3.47496e-06	FC	0.312645	0.379294	0.977669	0.0111929	3.30799e-05
54566|m.36241; PMI_007075	S12; S7	XP_022093916.1 obg-like ATPase 1 isoform X1 [Acanthaster planci] (id=91.44%; len=397; e=0.00E+00) ; XP_022093919.1 obg-like ATPase 1 isoform X4 [Acanthaster planci] (id=86.38%; len=367; e=0.00E+00)	MPPKKKSGEAKPL; MPPKKKSGEAKPL	3	1.846	0.5628	1.89828	1	1	1	1	1	S12; S7	0.0845431	0.122161	0.254187	0.338004	0.468317	1	0.998195	4.88421e-06	FC	0.208854	0.279945	0.958242	0.0894785	0.00128445
PMI_004181; PMI_027047; Pmi_548310_ARH_HUMAN_Low_density_lipoprotein_receptor_adapter_protein_1|m.9454	S195; S181; S178	XP_022108987.1 low density lipoprotein receptor adapter protein 1-B-like [Acanthaster planci] (id=77.81%; len=311; e=6.22E-158) ; XP_022108987.1 low density lipoprotein receptor adapter protein 1-B-like [Acanthaster planci] (id=91.92%; len=198; e=1.04E-122) ; ARH_HUMAN_Low_density_lipoprotein_receptor_adapter_protein_1	KDAPPTSPLQKSA; KDAPPTSPLQKSA; KDAPPTSPLQKSA	2,3	2.229	0.421	0.022226	1	4	3	4		S195; S181; S178	0.0782538	0.7423	0.648855	0.605015	0.735782	1	0.978193	0.000708106	FC
PMI_007216; PMI_019970	S536; S490	XP_022097759.1 leucine-rich repeat serine/threonine-protein kinase 2-like isoform X2 [Acanthaster planci] (id=56.37%; len=754; e=0.00E+00) ; XP_022097759.1 leucine-rich repeat serine/threonine-protein kinase 2-like isoform X2 [Acanthaster planci] (id=61.14%; len=826; e=0.00E+00)	RELFPGSPPPKGG; RELFPGSPPPKGG	2,3,4	2.373	0.6148	0.03897	1	4	5	4	1	S536; S490	0.0845369	0.758669	0.766025	0.812933	0.655543	1	0.975211	0.00091415	FC	0.0581182	0.119814	0.949717	0.092715	0.000747738
77660|m.52074; 77652|m.52054; 77667|m.52100; 77666|m.52092	S756; S667; S701; S612	XP_022097945.1 vesicle-associated protein-like, partial [Acanthaster planci] (id=71.09%; len=640; e=0.00E+00) ; XP_022097945.1 vesicle-associated protein-like, partial [Acanthaster planci] (id=67.66%; len=535; e=2.93E-174) ; XP_022097945.1 vesicle-associated protein-like, partial [Acanthaster planci] (id=71.09%; len=640; e=0.00E+00) ; XP_022097945.1 vesicle-associated protein-like, partial [Acant…	GPDVDVSPPSFGG; GPDVDVSPPSFGG; GPDVDVSPPSFGG; GPDVDVSPPSFGG	3,4	4.597	0.7469	0.015567	1	15	14	19	13	S756; S667; S701; S612	0.108726	0.491247	0.886716	0.832215	0.73941	1	0.992418	8.60202e-05	FC	0.0747237	0.106358	0.949622	0.191255	0.00301727
Pmi_667421_EDC4_XENLA_Enhancer_of_mRNA-decapping_protein_4|m.30656	T400	EDC4_XENLA_Enhancer_of_mRNA-decapping_protein_4	APQGRGTPTPTPG	3	5.287	0.7655	0.268495	0.99756	2	3	3		T400	0.171784	0.393381	0.766467	0.768122	0.707582	0.991964	0.814897	0.0482238	FC
Pmi_630900_TICRR_XENLA_Treslin|m.20660; PMI_016711	S280; S573	TICRR_XENLA_Treslin; XP_022111195.1 treslin-like [Acanthaster planci] (id=59.82%; len=1364; e=0.00E+00)	MRVIEESPLKPVQ; MRVIEESPLKPVQ	2,3	2.821	0.5969	0.01952	1	3	5	5	1	S280; S573	0.123507	0.722062	0.849549	0.651497	0.659482	1	0.994521	4.49533e-05	FC	0.753773	0.923747	0.634618	0.0633291	0.125282
Pmi_641830_PHF14_HUMAN_PHD_finger_protein_14|m.23162; PMI_008360; PMI_007386	S118; S118; S118	PHF14_HUMAN_PHD_finger_protein_14; XP_022105582.1 PHD finger protein 14-like isoform X1 [Acanthaster planci] (id=88.17%; len=761; e=0.00E+00) ; XP_022105582.1 PHD finger protein 14-like isoform X1 [Acanthaster planci] (id=82.07%; len=965; e=0.00E+00)	GSEKKTSIGELIT; GSEKKTSIGELIT; GSEKKTSIGELIT	3	1.789	0.3835	0.833221	0.99811	1	1	1	1	S118; S118; S118	0.101043	0.225281	0.530088	0.610812	0.681255	1	0.997706	7.88656e-06	FC	0.123681	0.199505	0.989067	0.00520948	1.58672e-07
PMI_001965	S545	XP_022084105.1 ubiquitin carboxyl-terminal hydrolase 10-like [Acanthaster planci] (id=89.06%; len=256; e=8.03E-147)	KTPTVASPPAAPK	3,4,5	4.628	0.6942	0.055893	1	9	12	12	3	S545	0.103054	0.771268	0.599849	0.607087	0.601061	1	0.987188	0.000245184	FC	0.212493	0.296151	0.968986	0.0996525	4.4048e-06
Pmi_644627_no_annot|m.23964; 80751|m.54301	S123; S87	no_annot; XP_022101651.1 la-related protein 4-like isoform X2 [Acanthaster planci] (id=72.71%; len=524; e=0.00E+00)	NGPQVVSPRGVFD; NGPQVVSPRGVFD	2,3	1.971	0.6048	0.196812	1	3	1	1	4	S123; S87	0.0883195	0.633299	0.861875	0.77143	0.790864	1	0.960772	0.00227807	FC	0.105099	0.216725	0.967536	0.0045453	3.33728e-05
Pmi_670971_no_annot|m.32100	T206	no_annot	VMNSPGTPKEKGQ	2,3,4	3.206	0.6314	0.020235	1	20	20	22	22	T206	0.0963815	0.657549	0.83147	0.8029	0.781718	1	0.987079	0.000249362	FC	0.115148	0.184871	0.947426	0.000147768	0.0010704
PMI_000851; PMI_012492; Pmi_612730_FRMD5_MOUSE_FERM_domain-containing_protein_5|m.17152	S333; S311; S345	XP_022106269.1 FERM domain-containing protein 5-like isoform X2 [Acanthaster planci] (id=82.61%; len=552; e=0.00E+00) ; XP_022106269.1 FERM domain-containing protein 5-like isoform X2 [Acanthaster planci] (id=81.63%; len=528; e=0.00E+00) ; FRMD5_MOUSE_FERM_domain-containing_protein_5	EPSFARSPPLIRP; EPSFARSPPLIRP; EPSFARSPPLIRP	3,4	3.137	0.6867	0.22822	1	4	4	2	1	S333; S311; S345	0.129131	0.958698	0.802863	0.932047	0.894229	0.994762	0.981078	0.000533656	FC	0.269182	0.394257	0.947887	0.0136352	0.000810475
75394|m.50329; PMI_026273; Pmi_638351_LARP6_MOUSE_La-related_protein_6|m.22327	T380:S382:S390; T333:S335:S343; T333:S335:S343	XP_022105865.1 la-related protein 6-like [Acanthaster planci] (id=84.82%; len=527; e=0.00E+00) ; XP_022105865.1 la-related protein 6-like [Acanthaster planci] (id=85.01%; len=527; e=0.00E+00) ; LARP6_MOUSE_La-related_protein_6	SQGGDLTASDGGE,GGDLTASDGGEGG,GGEGGDSAKKKKR; SQGGDLTASDGGE,GGDLTASDGGEGG,GGEGGDSAKKKKR; SQGGDLTASDGGE,GGDLTASDGGEGG,GGEGGDSAKKKKR	4	3.153	0.6389	0.31526	1	1	2	2		T380:S382:S390; T333:S335:S343; T333:S335:S343	0.112044	0.392846	0.223891	0.449297	0.425273	1	0.994897	3.89901e-05	FC
PMI_005042; Pmi_601740_CP070_RAT_UPF0183_protein_C16orf70_homolog|m.15401; PMI_005626	S149; S225; S265	XP_022092023.1 UPF0183 protein C16orf70 homolog [Acanthaster planci] (id=75.22%; len=335; e=1.34E-173) ; CP070_RAT_UPF0183_protein_C16orf70_homolog; XP_022092023.1 UPF0183 protein C16orf70 homolog [Acanthaster planci] (id=78.51%; len=470; e=0.00E+00)	GPGGGKSPESKHR; GPGGGKSPESKHR; GPGGGKSPESKHR	2,3,4	4.893	0.666	0.164718	1	2	1	3	3	S149; S225; S265	0.0968961	0.690299	0.92845	0.905957	0.735996	1	0.986317	0.000279549	FC	0.0968443	0.229983	0.946208	0.0119066	0.000575904
Pmi_668532_LIMC1_MOUSE_LIM_and_calponin_homology_domains-containing..CUT|m.31229; 31954|m.22801; PMI_008085	S390; S648; S102	LIMC1_MOUSE_LIM_and_calponin_homology_domains-containing..CUT; XP_022079520.1 titin homolog isoform X9 [Acanthaster planci] (id=82.97%; len=787; e=0.00E+00) ; XP_022079515.1 LIM domain only protein 7-like isoform X5 [Acanthaster planci] (id=71.15%; len=1265; e=0.00E+00)	TRSTERSPAKSDP; TRSTERSPAKSDP; TRSTERSPAKSDP	3,4,5	2.904	0.6319	0.071174	1	6	4	3	8	S390; S648; S102	0.175093	0.479432	0.674394	0.735791	0.833735	0.988848	0.927235	0.00774956	FC	0.400165	0.497121	0.978976	4.8027e-05	0.000181032
14698|m.9641; Pmi_622610_TCPR2_HUMAN_Tectonin_beta-propeller_repeat-containing_protein_2|m.18964	S288; S398	XP_022096649.1 tectonin beta-propeller repeat-containing protein 2-like [Acanthaster planci] (id=59.71%; len=484; e=1.09E-164) ; TCPR2_HUMAN_Tectonin_beta-propeller_repeat-containing_protein_2	AGGNVASPQFGTR; AGGNVASPQFGTR	2,3	4.28	0.6617	0.521601	1	2	1	2	1	S288; S398	0.0895573	0.342712	0.198071	0.462487	0.514067	1	0.830982	0.0404364	FC	0.851854	0.745133	0.952247	0.100243	0.102758
28331|m.20762; Pmi_651990_EXOC1_HUMAN_Exocyst_complex_component_1|m.25861; PMI_011919	S619; S618; S232	XP_022079464.1 exocyst complex component 1-like isoform X1 [Acanthaster planci] (id=93.60%; len=891; e=0.00E+00) ; EXOC1_HUMAN_Exocyst_complex_component_1; XP_022079467.1 exocyst complex component 1-like isoform X2 [Acanthaster planci] (id=86.28%; len=503; e=0.00E+00)	GYQVMASPNKQSS; GYQVMASPNKQSS; GYQVMASPNKQSS	2,3	3.174	0.6309	0.030864	1	5	6	5	2	S619; S618; S232	0.125453	0.458113	0.889279	0.747985	0.754147	0.97957	0.942576	0.00485156	FC	0.281042	0.289965	0.985847	0.653157	8.71608e-06
Pmi_623570_HSF1_MOUSE_Heat_shock_factor_protein_1|m.19145; 24563|m.18646; PMI_011512; 24561|m.18641	S503:S513; S130:S140; S403:S413; S143:S153	HSF1_MOUSE_Heat_shock_factor_protein_1; XP_022084111.1 heat shock factor protein-like isoform X2 [Acanthaster planci] (id=71.23%; len=146; e=7.54E-57) ; XP_022084112.1 heat shock factor protein-like isoform X3 [Acanthaster planci] (id=65.59%; len=465; e=0.00E+00) ; XP_022084112.1 heat shock factor protein-like isoform X3 [Acanthaster planci] (id=68.75%; len=160; e=1.03E-61)	EDSLLRSLDDDAA,DAAALASPNNRPK; EDSLLRSLDDDAA,DAAALASPNNRPK; EDSLLRSLDDDAA,DAAALASPNNRPK; EDSLLRSLDDDAA,DAAALASPNNRPK	3,4	3.094	0.6193	0.555647	1	2	1	1		S503:S513; S130:S140; S403:S413; S143:S153	0.0762869	0.429141	0.933487	0.885395	0.803057	0.948787	0.962113	0.00212591	FC
Pmi_639992_no_annot|m.22691; PMI_029451	S473; S449	no_annot; XP_022079315.1 neurabin-1-like isoform X6 [Acanthaster planci] (id=78.71%; len=620; e=0.00E+00)	AEETEASPTWDSS; AEETEASPTWDSS	2,3	3.662	0.7623	1.05564	0.99999	2	2	3		S473; S449	0.0635648	0.330024	0.824476	0.668639	0.779807	1	0.92014	0.00931187	FC
Pmi_532400_GATL2_HUMAN_GATS-like_protein_2|m.8183; 4577|m.2526	S173; S89	GATL2_HUMAN_GATS-like_protein_2; XP_022085589.1 cytosolic arginine sensor for mTORC1 subunit 2-like isoform X2 [Acanthaster planci] (id=73.76%; len=141; e=1.84E-69)	MPTEPKSPRPIVH; MPTEPKSPRPIVH	4,5	2.962	0.6016	0.008364	0.99988	1	2	2	2	S173; S89	0.0752572	0.169376	0.389575	0.495673	0.773908	1	0.969049	0.00142216	FC	0.121803	0.198914	0.968577	0.0604045	6.51768e-05
Pmi_641464_AAKB2_HUMAN_5p-AMP-activated_protein_kinase_subunit_beta-2|m.23083; PMI_002742; PMI_013585	S18; S18; S18	AAKB2_HUMAN_5p-AMP-activated_protein_kinase_subunit_beta-2; XP_022083160.1 5'-AMP-activated protein kinase subunit beta-2-like [Acanthaster planci] (id=89.29%; len=224; e=9.70E-148) ; XP_022083160.1 5'-AMP-activated protein kinase subunit beta-2-like [Acanthaster planci] (id=88.09%; len=277; e=2.57E-179)	DSGGPMSPTKENP; DSGGPMSPTKENP; DSGGPMSPTKENP	2,3,4,5	4.222	0.7043	0.037221	1	11	12	8	12	S18; S18; S18	0.0994775	0.757153	0.75164	0.74332	0.753736	1	0.987899	0.000218758	FC	0.258814	0.418298	0.975311	0.00067544	0.000267279
Pmi_535430_CUED1_HUMAN_CUE_domain-containing_protein_1|m.8449; PMI_002227	S151; S151	CUED1_HUMAN_CUE_domain-containing_protein_1; XP_022102226.1 CUE domain-containing protein 1-like isoform X1 [Acanthaster planci] (id=74.85%; len=493; e=0.00E+00)	DQPPPYSPPAPNS; DQPPPYSPPAPNS	3	3.214	0.6747	0.050274	1	2	2	2	2	S151; S151	0.0819243	0.111261	0.185298	0.540021	0.394625	1	0.958797	0.0025115	FC	0.812003	0.880188	0.54989	0.488968	0.0232694
68298|m.45542; Pmi_661270_KI67_HUMAN_Antigen_KI-67|m.29501; 68300|m.45548; 68304|m.45560; 68295|m.45534; 68297|m.45538; 68302|m.45554	S396; S396; S396; S396; S396; S396; S396	XP_022080667.1 nascent polypeptide-associated complex subunit alpha, muscle-specific form-like [Acanthaster planci] (id=59.10%; len=863; e=0.00E+00) ; KI67_HUMAN_Antigen_KI-67; XP_022080667.1 nascent polypeptide-associated complex subunit alpha, muscle-specific form-like [Acanthaster planci] (id=68.47%; len=964; e=0.00E+00) ; XP_022080667.1 nascent polypeptide-associated complex subunit alpha, mu…	SFGPQLSPEQFDK; SFGPQLSPEQFDK; SFGPQLSPEQFDK; SFGPQLSPEQFDK; SFGPQLSPEQFDK; SFGPQLSPEQFDK; SFGPQLSPEQFDK	2,3,4	3.688	0.6829	0.063515	1	3	5	5	3	S396; S396; S396; S396; S396; S396; S396	0.10463	0.458057	0.867801	0.830294	0.729071	1	0.994427	4.65075e-05	FC	0.749361	0.786167	0.88419	0.441089	0.139738
62771|m.41512; 62772|m.41513; Pmi_659810_TM209_XENLA_Transmembrane_protein_209|m.28166	S127; S127; S127	XP_022081205.1 transmembrane protein 209-like isoform X1 [Acanthaster planci] (id=84.70%; len=281; e=2.76E-153) ; XP_022081205.1 transmembrane protein 209-like isoform X1 [Acanthaster planci] (id=87.27%; len=322; e=0.00E+00) ; TM209_XENLA_Transmembrane_protein_209	FRPRVASAPANLS; FRPRVASAPANLS; FRPRVASAPANLS	2,3	4.451	0.7293	0.044102	1	2	2	3	3	S127; S127; S127	0.116379	0.395813	0.559671	0.92309	0.875562	0.991309	0.992917	7.50839e-05	FC	0.170837	0.218877	0.970703	0.00482512	0.000264183
63382|m.41908	S38:S39	XP_022098270.1 uncharacterized protein LOC110983366 isoform X2 [Acanthaster planci] (id=63.07%; len=176; e=9.36E-62)	KAQHIFSSPEDVS,AQHIFSSPEDVSL	3	4.188	0.6292	0.111182	1	1	1	1		S38:S39	0.124076	0.675684	0.661986	0.890415	0.571316	0.948744	0.883676	0.01951	FC
Pmi_669610_SAPS3_CHICK_Serine/threonine-protein_phosphatase_6_regul..CUT|m.31728; PMI_004204; PMI_019514	T667:S670; T194:S197; T603:S606	SAPS3_CHICK_Serine/threonine-protein_phosphatase_6_regul..CUT; XP_022101967.1 serine/threonine-protein phosphatase 6 regulatory subunit 3-A-like isoform X4 [Acanthaster planci] (id=81.63%; len=588; e=0.00E+00) ; XP_022101958.1 serine/threonine-protein phosphatase 6 regulatory subunit 3-like isoform X3 [Acanthaster planci] (id=79.05%; len=802; e=0.00E+00)	DNTKEATPGSPQP,KEATPGSPQPSPS; ENTKEATPGSPQP,KEATPGSPQPSPS; ENTKEATPGSPQP,KEATPGSPQPSPS	3	2.288	0.5887	0.486117	1	1	1	1		T667:S670; T194:S197; T603:S606	0.0759783	0.518008	0.712349	0.6108	0.654544	1	0.954785	0.00302033	FC
PMI_010682; Pmi_664101_DCTN1_HUMAN_Dynactin_subunit_1|m.29564	S86; S86	XP_022080745.1 dynactin subunit 1-like isoform X4 [Acanthaster planci] (id=86.29%; len=642; e=0.00E+00) ; DCTN1_HUMAN_Dynactin_subunit_1	PGSGTVSPGVASP; PGSGTVSPGVASP	3,4,5	6.48	0.7314	0.065519	1	3	2	2	2	S86; S86	0.0782508	0.342212	0.472857	0.786314	0.768171	1	0.99042	0.000137215	FC	0.229591	0.327062	0.927252	0.12396	0.0022964
PMI_000876	S2115	XP_011665894.1 PREDICTED: hydrocephalus-inducing protein homolog [Strongylocentrotus purpuratus] (id=66.72%; len=5219; e=0.00E+00)	TKGQATSPTISQE	2,3,5	3.557	0.6396	0.062536	0.99556	1	2	3		S2115	0.072772	0.34423	0.699287	0.819168	0.774054	0.955859	0.908478	0.0121812	FC
PMI_020269; Pmi_610861_GULP1_MOUSE_PTB_domain-containing_engulfment_adapter_protein_1|m.16864; PMI_020827	S215; S225; S367	XP_022088392.1 PTB domain-containing engulfment adapter protein 1-like isoform X1 [Acanthaster planci] (id=74.24%; len=361; e=1.71E-175) ; GULP1_MOUSE_PTB_domain-containing_engulfment_adapter_protein_1; XP_022088398.1 PTB domain-containing engulfment adapter protein 1-like isoform X3 [Acanthaster planci] (id=68.19%; len=415; e=3.38E-174)	PSAAGASPQPTLL; PSAAGASPQPTLL; PSAAGASPQPTLL	3,4,5	6.896	0.7385	0.017292	1	5	4	4	11	S215; S225; S367	0.111768	0.356238	0.132417	0.385424	0.436216	1	0.991698	0.000103089	FC	0.279354	0.411552	0.954284	0.0340696	0.00105339
22179|m.16840; Pmi_642861_VILI_HUMAN_Villin-1|m.23421; PMI_004164	S355; S25; S410	XP_022109357.1 advillin-like isoform X2 [Acanthaster planci] (id=90.29%; len=721; e=0.00E+00) ; VILI_HUMAN_Villin-1; XP_022109337.1 advillin-like isoform X1 [Acanthaster planci] (id=81.37%; len=322; e=5.83E-176)	KVGEVKSPRGNIA; KVGEVKSPRGNIA; KVGEVKSPRGNIG	2	1.425	0.5544	0.160577	1	3	2	3	2	S355; S25; S410	0.0759059	0.611169	0.959945	0.870897	0.781245	1	0.993904	5.563e-05	FC	0.134385	0.18674	0.906175	0.250746	0.000751745
Pmi_664730_K1467_CHICK_Uncharacterized_protein_KIAA1467_homolog|m.29744	S59	K1467_CHICK_Uncharacterized_protein_KIAA1467_homolog	SRKPLMSPQKQAK	3	1.601	0.3887	0.143331	1	1	2	2	1	S59	0.117188	0.869746	0.800652	0.864205	0.744052	1	0.977922	0.000725784	FC	0.176739	0.280968	0.945448	0.000534599	0.000697291
PMI_005589; 19472|m.13981; Pmi_606170_KAD5_HUMAN_Adenylate_kinase_isoenzyme_5|m.16076	S106; S124; S153	XP_022084206.1 adenylate kinase isoenzyme 5-like isoform X1 [Acanthaster planci] (id=64.39%; len=1056; e=0.00E+00) ; XP_022084206.1 adenylate kinase isoenzyme 5-like isoform X1 [Acanthaster planci] (id=74.62%; len=465; e=0.00E+00) ; KAD5_HUMAN_Adenylate_kinase_isoenzyme_5	LPPIATSPGAATA; LPPIATSPGAATA; LPPIATSPGAATA	2,3,4	4.495	0.7423	0.000637	1	8	9	7	5	S106; S124; S153	0.107212	0.619284	0.969277	0.827051	0.771396	0.975183	0.990867	0.000124742	FC	0.181244	0.236598	0.987932	0.0401498	3.20473e-07
Pmi_662244_CEP57_RAT_Centrosomal_protein_of_57_kDa|m.29018	S449	CEP57_RAT_Centrosomal_protein_of_57_kDa	KPIQVISPESKSN	3	3.247	0.7011	0.630011	1	1	1	2	1	S449	0.0857422	0.711916	0.881427	0.876577	0.758266	1	0.968873	0.00143824	FC	0.113438	0.200228	0.984737	0.0126449	1.90579e-05
PMI_020483	S286	XP_022094048.1 ubiquitin-conjugating enzyme E2 T-like [Acanthaster planci] (id=53.28%; len=259; e=3.86E-53)	QAGKRPSVEDLNA	3,4	3.718	0.6926	0.06934	1	7	7	5	4	S286	0.108211	0.223481	0.709579	0.627785	0.771378	1	0.927748	0.00764183	FC	0.146815	0.22214	0.9901	0.000282306	3.41423e-05
PMI_014327; PMI_022149; Pmi_641003_WIBG_XENTR_Partner_of_Y14_and_mago|m.22972	S175; S173; S175	XP_022090724.1 partner of Y14 and mago-like [Acanthaster planci] (id=79.41%; len=204; e=3.43E-85) ; XP_022090724.1 partner of Y14 and mago-like [Acanthaster planci] (id=80.20%; len=202; e=1.16E-88) ; WIBG_XENTR_Partner_of_Y14_and_mago	DSGELESPSKDQL; DSGELESPSKDQL; DSGELESPSKDQL	3,4	3.972	0.561	0.071344	1	2	1	2	7	S175; S173; S175	0.107504	0.468476	0.800701	0.782057	0.739124	1	0.975196	0.000915191	FC	0.143025	0.176498	0.977552	0.00263867	0.00045936
PMI_025998	S547	XP_022102124.1 TBC1 domain family member 10A-like [Acanthaster planci] (id=80.51%; len=467; e=0.00E+00)	TGESPGSPDTEKP	2,3,4	2.864	0.644	0.103513	1	2	4	3	1	S547	0.0985612	0.78789	0.905554	0.845479	0.74878	1	0.997284	1.10582e-05	FC	0.171876	0.257499	0.969314	0.0691621	0.00104708
PMI_013744	T792	XP_022087184.1 epidermal growth factor receptor substrate 15-like 1 isoform X1 [Acanthaster planci] (id=72.10%; len=1043; e=0.00E+00)	DPFNSKTTPDPFK	3,4	3.892	0.6485	0.04384	0.99823	1	1	3		T792	0.0690921	0.215826	0.81599	0.828549	0.849244	0.915074	0.920359	0.00926143	FC
PMI_012378; Pmi_582780_DJC25_XENLA_DnaJ_homolog_subfamily_C_member_25|m.12850	S167; S172	PIK48167.1 hypothetical protein BSL78_14959 [Apostichopus japonicus] (id=41.19%; len=403; e=2.11E-93) ; DJC25_XENLA_DnaJ_homolog_subfamily_C_member_25	IDYLASSPKYRIR; IDYLASSPKYRIR	2,3	3.581	0.618	0.1631	1	2	2	2	1	S167; S172	0.10372	0.360161	0.890743	0.785374	0.742854	1	0.982747	0.000443941	FC	0.114069	0.156188	0.98544	0.0167501	1.6388e-07
PMI_005528	S730	XP_022081250.1 optineurin-like isoform X1 [Acanthaster planci] (id=70.31%; len=805; e=0.00E+00)	GTYDEISPGRMPA	2	1.291	0.5474	0.471189	1	1	1	1		S730	0.0970941	0.657473	0.955676	0.838298	0.763023	0.998605	0.857238	0.0291166	FC
PMI_009496; PMI_015395; Pmi_614590_no_annot|m.17436; 18851|m.13385	S727; S732; S48; S35	XP_022088967.1 LOW QUALITY PROTEIN: AT-rich interactive domain-containing protein 4A-like [Acanthaster planci] (id=66.11%; len=602; e=2.52E-163) ; XP_022088967.1 LOW QUALITY PROTEIN: AT-rich interactive domain-containing protein 4A-like [Acanthaster planci] (id=78.11%; len=338; e=2.19E-140) ; no_annot; XP_022088967.1 LOW QUALITY PROTEIN: AT-rich interactive domain-containing protein 4A-like [Acan…	RRSDRKSLSDSPF; RRSDRKSLSDSPF; RRSDRKSLSDSPF; RRSDRKSLSDSPF	3,4	4.704	0.7732	0.055598	1	4	3	3	2	S727; S732; S48; S35	0.0975029	0.0920232	0.119737	0.936301	0.497997	0.978655	0.990908	0.000123629	FC	0.590285	0.861081	0.398504	0.0550745	0.0146331
PMI_002331; Pmi_506522_HERC2_MOUSE_E3_ubiquitin-protein_ligase_HERC2|m.6510	S203; S129	XP_022098915.1 E3 ubiquitin-protein ligase HERC2-like [Acanthaster planci] (id=90.32%; len=2583; e=0.00E+00) ; HERC2_MOUSE_E3_ubiquitin-protein_ligase_HERC2	SPVKTRSPPKPTE; SPVKTRSPPKPTE	4	1.441	0.3907	0.096631	0.99718	1	1	1		S203; S129	0.105723	0.477876	0.802293	0.818199	0.74682	1	0.97331	0.00105901	FC
PMI_022789; Pmi_580560_ADRB1_SHEEP_Beta-1_adrenergic_receptor|m.12596; PMI_023158	T107; T284; T282	XP_022087349.1 delta-type opioid receptor-like isoform X2 [Acanthaster planci] (id=87.50%; len=208; e=7.38E-130) ; ADRB1_SHEEP_Beta-1_adrenergic_receptor; XP_022087348.1 delta-type opioid receptor-like isoform X1 [Acanthaster planci] (id=85.71%; len=385; e=0.00E+00)	RRRSGPTQLMLIK; RRRSGPTQLMLIK; RRRSGPTQLMLIK	3,4	3.35	0.4802	0.022766	0.99787	6	8	5	4	T107; T284; T282	0.119711	0.464729	0.850935	0.828784	0.750275	1	0.976762	0.000803732	FC	0.153683	0.338934	0.95865	0.0240149	0.000667823
Pmi_555110_no_annot|m.10021; PMI_005986; PMI_001775	S248; S1027; S1011	no_annot; XP_022091082.1 uncharacterized protein LOC110979526 isoform X4 [Acanthaster planci] (id=60.25%; len=1844; e=0.00E+00) ; XP_022091079.1 uncharacterized protein LOC110979526 isoform X1 [Acanthaster planci] (id=59.69%; len=1843; e=0.00E+00)	ERSRRVSGSSVSK; ERSRRVSGSSVSK; ERSRRVSGSSVSK	2,4,5	1.754	0.508	0.099931	0.99795	2	1	1	1	S248; S1027; S1011	0.108986	0.47459	0.722475	0.778045	0.672672	1	0.963242	0.00200188	FC	0.13287	0.353994	0.909313	0.0361761	0.00332059
Pmi_653522_CDC6_MOUSE_Cell_division_control_protein_6_homolog|m.26282; PMI_022226; 63669|m.42095; 63670|m.42096	S117; S117; S117; S117	CDC6_MOUSE_Cell_division_control_protein_6_homolog; BAH83663.1 cell division cycle 6 [Patiria pectinifera] (id=92.56%; len=618; e=0.00E+00) ; BAH83663.1 cell division cycle 6 [Patiria pectinifera] (id=95.79%; len=618; e=0.00E+00) ; BAH83663.1 cell division cycle 6 [Patiria pectinifera] (id=95.47%; len=618; e=0.00E+00)	PLTPCCSPRKMKK; PLTPCCSPRKMKK; PLTPCCSPRKMKK; PLTPCCSPRKMKK	3,4	4.946	0.7125	0.083247	1	2	4	3	1	S117; S117; S117; S117	0.0950612	0.0849141	0.14012	0.331414	0.372695	1	0.99648	1.85649e-05	FC	0.803915	0.913361	0.293571	0.166424	0.00332723
Pmi_637080_COBL1_HUMAN_Cordon-bleu_protein-like_1|m.22060	S627	COBL1_HUMAN_Cordon-bleu_protein-like_1	KEKVDESPTKVED	2,3,4,5	3.666	0.5356	0.218085	0.99999	3	4	3	4	S627	0.105045	0.905497	0.812249	0.648574	0.641132	0.945672	0.892822	0.0166151	FC	0.155749	0.195632	0.960048	0.0367667	0.000627731
28331|m.20762; PMI_019359; Pmi_651990_EXOC1_HUMAN_Exocyst_complex_component_1|m.25861	T142; T142; T142	XP_022079464.1 exocyst complex component 1-like isoform X1 [Acanthaster planci] (id=93.60%; len=891; e=0.00E+00) ; XP_022079464.1 exocyst complex component 1-like isoform X1 [Acanthaster planci] (id=92.23%; len=528; e=0.00E+00) ; EXOC1_HUMAN_Exocyst_complex_component_1	SLLEEFTPVGDQS; SLLEEFTPVGDQS; SLLEEFTPVGDQS	3,4	6.075	0.7339	0.104766	1	2	2	3		T142; T142; T142	0.11504	0.249941	0.808388	0.902806	0.744204	1	0.993114	7.0961e-05	FC
Pmi_661700_SMCA5_HUMAN_SWI/SNF-related_matrix-associated_actin-depen..CUT|m.28819; 74554|m.49800; PMI_012868; 74553|m.49797	S75:S78; S75:S78; S75:S78; S75:S78	SMCA5_HUMAN_SWI/SNF-related_matrix-associated_actin-depen..CUT; XP_022111423.1 SWI/SNF-related matrix-associated actin-dependent regulator of chromatin subfamily A member 5-like isoform X1 [Acanthaster planci] (id=96.87%; len=1022; e=0.00E+00) ; XP_022111423.1 SWI/SNF-related matrix-associated actin-dependent regulator of chromatin subfamily A member 5-like isoform X1 [Acanthaster planci] (id=94.…	ATSSVKSPTSPLK,SVKSPTSPLKLKP; ATSSVKSPTSPLK,SVKSPTSPLKLKP; ATSSVKSPTSPLK,SVKSPTSPLKLKP; ATSSVKSPTSPLK,SVKSPTSPLKLKP	2	1.506	0.3436	0.100455	0.99721	2	2	2	1	S75:S78; S75:S78; S75:S78; S75:S78	0.0964418	0.228932	0.590439	0.606596	0.663063	1	0.973391	0.00105262	FC	0.22054	0.280913	0.918578	0.0422311	0.00115756
76867|m.51366; Pmi_660744_KS6A3_MOUSE_Ribosomal_protein_S6_kinase_alpha-3|m.28481	S23; S23	BAB85907.1 p90 ribosomal S6 kinase [Patiria pectinifera] (id=99.32%; len=738; e=0.00E+00) ; KS6A3_MOUSE_Ribosomal_protein_S6_kinase_alpha-3	EQAEGKSSEEMLV; EQAEGKSSEEMLV	3,4,5	6.435	0.8143	0.053546	0.99846	34	29	31	15	S23; S23	0.117981	0.75839	0.909657	0.89982	0.813591	1	0.971645	0.00119458	FC	0.28823	0.552503	0.970397	0.0456607	1.41272e-05
Pmi_650660_no_annot|m.25445	S16	no_annot	QVGMPLSPTVEYA	2,3	5.213	0.7531	0.02903	1	5	5	5	1	S16	0.0927679	0.451765	0.854722	0.84006	0.778867	1	0.97538	0.000901764	FC	0.0923238	0.178704	0.99426	0.00549872	5.63074e-07
24956|m.18854	S285	XP_022108476.1 calcium-dependent secretion activator 1-like isoform X3 [Acanthaster planci] (id=96.83%; len=695; e=0.00E+00)	GHVRKESLNSEDL	3,4	3.49	0.6043	0.05546	1	4	4	5	3	S285	0.115456	0.196914	0.575232	0.68756	0.752381	1	0.99825	4.59168e-06	FC	0.328948	0.393566	0.980584	0.0939886	1.73011e-06
Pmi_634460_MY18A_HUMAN_Unconventional_myosin-XVIIIa|m.21425; PMI_022727	S48; S585	MY18A_HUMAN_Unconventional_myosin-XVIIIa; XP_022085608.1 unconventional myosin-XVIIIa-like isoform X5 [Acanthaster planci] (id=90.83%; len=676; e=0.00E+00)	KNLGAKSPTSPTP; KNLGAKSPTSPTP	2,3	2.978	0.7674	0.065637	1	1	2	3	2	S48; S585	0.061813	0.217974	0.617672	0.607841	0.86591	0.943227	0.958194	0.00258513	FC	0.115215	0.174403	0.922692	0.101446	0.00476322
PMI_006099; 73224|m.49012; PMI_002129; Pmi_613441_TBCD5_HUMAN_TBC1_domain_family_member_5|m.17270	S649; S166; S753; S231	XP_022106137.1 TBC1 domain family member 5-like isoform X4 [Acanthaster planci] (id=78.12%; len=768; e=0.00E+00) ; XP_022106138.1 TBC1 domain family member 5-like isoform X5 [Acanthaster planci] (id=75.29%; len=259; e=3.45E-117) ; XP_022106135.1 TBC1 domain family member 5-like isoform X2 [Acanthaster planci] (id=77.98%; len=722; e=0.00E+00) ; TBCD5_HUMAN_TBC1_domain_family_member_5	KVEENPSPPVSKM; KVEENPSPPVSKM; KVEENPSPPVSKM; KVEENPSPPVSKM	3,4	4.793	0.6474	0.144332	1	1	1	2	1	S649; S166; S753; S231	0.0944622	0.387674	0.745271	0.782222	0.722883	1	0.980512	0.000565998	FC	0.314551	0.385231	0.779641	0.189926	0.0423408
PMI_012322; Pmi_564300_RPGF1_HUMAN_Rap_guanine_nucleotide_exchange_factor_1|m.10807	S179; S225	XP_022085081.1 rap guanine nucleotide exchange factor 1-like isoform X1 [Acanthaster planci] (id=85.10%; len=1007; e=0.00E+00) ; RPGF1_HUMAN_Rap_guanine_nucleotide_exchange_factor_1	YEQRPLSPREKEM; YEQRPLSPREKEM	3,4	2.775	0.6018	0.027327	1	2	3	4	2	S179; S225	0.117841	0.754535	0.967879	0.893805	0.811936	0.996315	0.933727	0.00644268	FC	0.229202	0.37884	0.893392	0.0225274	0.00412817
Pmi_645661_PCM1_XENLA_Pericentriolar_material_1_protein|m.24206; 71614|m.47860	T200; T78	PCM1_XENLA_Pericentriolar_material_1_protein; XP_022084433.1 pericentriolar material 1 protein-like isoform X5 [Acanthaster planci] (id=81.51%; len=265; e=1.71E-133)	GANRQRTQSGNDS; GANRQRTQSGNDS	2,3,4	2.135	0.7023	0.091551	0.99629	8	6	6	2	T200; T78	0.1951	0.781483	0.831076	0.775682	0.82757	0.978877	0.905055	0.013094	FC	0.653009	0.956805	0.974841	0.0046086	1.58274e-05
43429|m.29272; Pmi_617141_NSF1C_HUMAN_NSFL1_cofactor_p47|m.17929; PMI_006703	S89; S180; S179	XP_022094135.1 NSFL1 cofactor p47-like [Acanthaster planci] (id=77.78%; len=108; e=2.95E-50) ; NSF1C_HUMAN_NSFL1_cofactor_p47; XP_022097496.1 piggyBac transposable element-derived protein 4-like [Acanthaster planci] (id=57.05%; len=489; e=0.00E+00)	GAGSSTSPDASSG; GAGSSTSPDASSG; GAGSSTSPDASSG	3,4,5	7.649	0.8264	0.034779	1	12	11	9	5	S89; S180; S179	0.179624	0.378857	0.755088	0.552444	0.745782	1	0.897591	0.0151943	FC	0.425489	0.438964	0.96935	0.819346	0.00421948
45168|m.30334; PMI_000044; Pmi_637080_COBL1_HUMAN_Cordon-bleu_protein-like_1|m.22060	S340:S342; S221:S223; S340:S342	XP_022099079.1 cordon-bleu protein-like 1 isoform X4 [Acanthaster planci] (id=70.87%; len=563; e=0.00E+00) ; XP_022099081.1 protein cordon-bleu-like isoform X6 [Acanthaster planci] (id=68.03%; len=513; e=2.38E-155) ; COBL1_HUMAN_Cordon-bleu_protein-like_1	PGKHLTSASDDEK,KHLTSASDDEKLD; PGKHLTSASDDEK,KHLTSASDDEKLD; PGKHLTSASDDEK,KHLTSASDDEKLD	3,4	6.012	0.7503	0.000463	0.99999	1	2	2		S340:S342; S221:S223; S340:S342	0.0895071	0.140155	0.676122	0.627396	0.779651	1	0.934214	0.00634935	FC
PMI_002165; 65418|m.43524	S629; S11	XP_022091550.1 ankyrin repeat and LEM domain-containing protein 2-like isoform X1 [Acanthaster planci] (id=61.69%; len=757; e=0.00E+00) ; XP_022091551.1 ankyrin repeat and LEM domain-containing protein 2-like isoform X2 [Acanthaster planci] (id=28.68%; len=129; e=3.00E-01)	DVSSDLSPTADAR; DVSSDLSPTADAR	2,3	4.065	0.7418	0.087556	1	6	5	6		S629; S11	0.0798573	0.561166	0.838563	0.877673	0.763753	1	0.994886	3.91632e-05	FC
Pmi_594940_no_annot|m.14489	S371	no_annot	TRTLPSSPPSDVP	2,3	2.201	0.6015	0.10588	0.99244	1	1	1	2	S371	0.160359	0.619773	0.840972	0.934218	0.730099	0.951375	0.967049	0.00161081	FC	0.409039	0.440497	0.968875	0.217693	0.000198449
PMI_024108; PMI_018295; Pmi_600670_SETD8_XENTR_N-lysine_methyltransferase_SETD8|m.15262	S26; S53; S26	XP_022106615.1 N-lysine methyltransferase KMT5A-like [Acanthaster planci] (id=66.39%; len=238; e=5.61E-82) ; PIK45655.1 putative N-lysine methyltransferase SETD8-B isoform X2 [Apostichopus japonicus] (id=69.10%; len=178; e=1.02E-86) ; SETD8_XENTR_N-lysine_methyltransferase_SETD8	APVPDKSPKICEE; APVPDKSPKICEE; APVPDKSPKICEE	3,4,5	3.635	0.7076	0.001707	1	5	4	5	6	S26; S53; S26	0.0963265	0.464207	0.826476	0.78041	0.709519	1	0.977955	0.000723637	FC	0.13701	0.205005	0.982175	0.00561681	1.48057e-06
PMI_008201; PMI_012528	S268; S803	XP_022087295.1 E3 ubiquitin-protein ligase UHRF1-like [Acanthaster planci] (id=72.82%; len=412; e=0.00E+00) ; XP_022087295.1 E3 ubiquitin-protein ligase UHRF1-like [Acanthaster planci] (id=80.15%; len=932; e=0.00E+00)	DEVPASSPKKTKV; DEVPASSPKKTKV	2,3,4,5	3.117	0.6983	0.225139	1	6	4	3	5	S268; S803	0.11195	0.295504	0.582138	0.563834	0.637627	1	0.991281	0.000113699	FC	0.993259	0.87804	0.461092	0.0767828	4.60558e-05
Pmi_666650_K0586_HUMAN_Uncharacterized_protein_KIAA0586|m.30419; PMI_024048; PMI_008393	S501; S8; S8	K0586_HUMAN_Uncharacterized_protein_KIAA0586; XP_022081340.1 TALPID3 protein-like isoform X2 [Acanthaster planci] (id=69.19%; len=409; e=2.17E-169) ; XP_022081340.1 TALPID3 protein-like isoform X2 [Acanthaster planci] (id=67.66%; len=235; e=5.86E-86)	VARGVTSPESGAE; LCRGVTSPESGAE; LCRGVTSPESGAE	2,3	3.44	0.6089	0.091436	1	2	3	2	2	S501; S8; S8	0.0964489	0.799903	0.902472	0.830063	0.718057	1	0.999422	5.0044e-07	FC	0.0943094	0.186371	0.983641	2.70295e-05	4.45424e-05
53459|m.35501	S399:S402	XP_022100191.1 uncharacterized protein LOC110984363 isoform X2 [Acanthaster planci] (id=59.86%; len=1328; e=0.00E+00)	QEPPVRSPVSPGS,PVRSPVSPGSTSR	2,3,4	2.225	0.5765	0.026727	1	6	8	5		S399:S402	0.115296	0.594397	0.934661	0.840016	0.845631	1	0.98312	0.000424997	FC
PMI_007029; Pmi_532871_HNRPK_BOVIN_Heterogeneous_nuclear_ribonucleoprotein_K|m.8224	S27; S37	XP_022104649.1 heterogeneous nuclear ribonucleoprotein K-like isoform X1 [Acanthaster planci] (id=66.12%; len=242; e=1.54E-94) ; HNRPK_BOVIN_Heterogeneous_nuclear_ribonucleoprotein_K	KRARGGSGSKPGE; KRARGGSGSKPGE	2,3,4	2.074	0.6007	0.016908	1	17	12	14	13	S27; S37	0.109094	0.291744	0.684278	0.74268	0.750826	1	0.988238	0.000206695	FC	0.164141	0.302015	0.975104	0.000671034	5.33066e-05
75431|m.50360; 75420|m.50342; Pmi_652860_IF4B_MOUSE_Eukaryotic_translation_initiation_factor_4B|m.26087; 75430|m.50356; PMI_002499; 75427|m.50351; 75417|m.50335	S143:S146; S242:S245; S508:S511; S226:S229; S540:S543; S242:S245; S226:S229	XP_022084644.1 eukaryotic translation initiation factor 4B-like isoform X2 [Acanthaster planci] (id=73.80%; len=355; e=3.59E-141) ; XP_022084643.1 eukaryotic translation initiation factor 4B-like isoform X1 [Acanthaster planci] (id=65.91%; len=525; e=0.00E+00) ; IF4B_MOUSE_Eukaryotic_translation_initiation_factor_4B; XP_022084646.1 eukaryotic translation initiation factor 4B-like isoform X4 [Acan…	IIARRESERSNED,RRESERSNEDDSA; IIARRESERSNED,RRESERSNEDDSA; IIARRESERSNED,RRESERSNEDDSA; IIARRESERSNED,RRESERSNEDDSA; RRERRESERSNED,RRESERSNEDDSA; IIARRESERSNED,RRESERSNEDDSA; IIARRESERSNED,RRESERSNEDDSA	4	1.907	0.4195	0.013039	1	1	1	1		S143:S146; S242:S245; S508:S511; S226:S229; S540:S543; S242:S245; S226:S229	0.151144	0.524266	0.80563	0.659492	0.87634	0.951197	0.914304	0.0107011	FC
PMI_017663; Pmi_524250_no_annot|m.7609	S268; S106	XP_022085331.1 uncharacterized protein LOC110976405 isoform X3 [Acanthaster planci] (id=67.96%; len=746; e=0.00E+00) ; no_annot	PTPDNLSPEKPST; PTPDNLSPEKPST	3,4	3.734	0.5655	0.135106	0.99992	1	1	2	1	S268; S106	0.0969197	0.0687624	0.0682858	0.458648	0.412828	1	0.996121	2.25417e-05	FC	0.360256	0.815364	0.662965	0.0384377	0.0399013
PMI_026161	S798	XP_022086720.1 nascent polypeptide-associated complex subunit alpha, muscle-specific form-like isoform X1 [Acanthaster planci] (id=58.23%; len=1099; e=0.00E+00)	SLKEIGSPIEEPV	2,3	3.481	0.5285	0.06828	1	4	4	4	1	S798	0.0878321	0.468511	0.883291	0.749685	0.737398	1	0.967224	0.00159382	FC	0.133781	0.188016	0.926032	0.0449905	0.00304404
47666|m.31915; 47663|m.31907; PMI_008451; Pmi_668580_CASC5_HUMAN_Protein_CASC5|m.31106; 47665|m.31912	S1026; S1044; S563; S118; S1049	XP_022093057.1 uncharacterized protein LOC110980557 [Acanthaster planci] (id=40.02%; len=1052; e=0.00E+00) ; XP_022093057.1 uncharacterized protein LOC110980557 [Acanthaster planci] (id=43.91%; len=1018; e=0.00E+00) ; XP_022093057.1 uncharacterized protein LOC110980557 [Acanthaster planci] (id=49.33%; len=1415; e=0.00E+00) ; CASC5_HUMAN_Protein_CASC5; XP_022093057.1 uncharacterized protein LOC110…	ASLGVVSPGKKSS; ASLGVVSPGKKSS; ASLGVVSPGKKSS; ASLGVVSPGKKSS; ASLGVVSPGKKSS	2,3,4,5	5.915	0.73	0.041238	1	5	4	4	4	S1026; S1044; S563; S118; S1049	0.104852	0.789851	0.829175	0.851114	0.780822	1	0.996258	2.09783e-05	FC	0.133356	0.238197	0.9868	0.0122905	3.83992e-05
79083|m.53034	S22	XP_022093057.1 uncharacterized protein LOC110980557 [Acanthaster planci] (id=62.98%; len=624; e=0.00E+00)	ASLGVVSPGKKSS	2,3,4	3.839	0.6629	0.041238	1	5	4	4	2	S22	0.104852	0.789851	0.829175	0.851114	0.780822	1	0.996258	2.09783e-05	FC	0.0948235	0.173368	0.938807	0.0932289	0.00116285
PMI_007977	S211	XP_022085235.1 patatin-like phospholipase domain-containing protein 7 isoform X5 [Acanthaster planci] (id=86.04%; len=1289; e=0.00E+00)	LNRRTCSPVKKPS	2,3,4,5	4.189	0.6888	0.119896	1	4	3	3	4	S211	0.115568	0.669751	0.809589	0.825072	0.713445	1	0.969733	0.00136028	FC	0.151175	0.223778	0.95826	0.0390696	0.00136845
PMI_001965; 76455|m.51040; Pmi_656052_UBP10_CHICK_Ubiquitin_carboxyl-terminal_hydrolase_10|m.27038; 76457|m.51044	S375; S315; S218; S290	XP_022084105.1 ubiquitin carboxyl-terminal hydrolase 10-like [Acanthaster planci] (id=89.06%; len=256; e=8.03E-147) ; XP_022084105.1 ubiquitin carboxyl-terminal hydrolase 10-like [Acanthaster planci] (id=74.88%; len=856; e=0.00E+00) ; UBP10_CHICK_Ubiquitin_carboxyl-terminal_hydrolase_10; XP_022084105.1 ubiquitin carboxyl-terminal hydrolase 10-like [Acanthaster planci] (id=74.88%; len=856; e=0.00E…	HAPERTSPIAVGT; HAPERTSPIAVGT; HAPERTSPIAVGT; HAPERTSPIAVGT	2,3,4,5	5.879	0.6822	0.046874	0.99755	4	2	5	5	S375; S315; S218; S290	0.111429	0.3752	0.844702	0.788699	0.760545	0.993122	0.964392	0.0018793	FC	0.299636	0.284777	0.932161	0.823665	0.00460319
Pmi_639991_NEB2_HUMAN_Neurabin-2|m.22686	S845	NEB2_HUMAN_Neurabin-2	LKHIGKSPIPVAA	4	5.427	0.6554	0.029596	1	5	2	4	2	S845	0.0672671	0.926161	0.90182	0.723322	0.751324	1	0.958088	0.00259806	FC	0.104024	0.228752	0.961904	0.0105435	0.000107186
PMI_015565	S320	XP_022081250.1 optineurin-like isoform X1 [Acanthaster planci] (id=72.64%; len=552; e=0.00E+00)	LPPTPFSPGQAIK	3,4	4.339	0.7193	0.008525	1	7	5	6		S320	0.127559	0.806923	0.766981	0.767405	0.700009	1	0.96289	0.00204013	FC
PMI_011205; Pmi_637600_PACN2_CHICK_Protein_kinase_C_and_casein_kinase_substrate_i..CUT|m.22182	S236:S239; S286:S289	XP_022082700.1 protein kinase C and casein kinase substrate in neurons protein 1-like isoform X1 [Acanthaster planci] (id=72.83%; len=346; e=3.98E-169) ; PACN2_CHICK_Protein_kinase_C_and_casein_kinase_substrate_i..CUT	PYTRQMSQESHDE,RQMSQESHDEEVK; YGDRQMSQESHDE,RQMSQESHDEEVK	2,3,4	2.678	0.6485	0.114593	1	8	9	6	11	S236:S239; S286:S289	0.0912808	0.146131	0.854226	0.866974	0.804771	0.985623	0.976065	0.000852473	FC	0.181183	0.198255	0.969206	0.295676	0.000237333
Pmi_659691_NBAS_DANRE_Neuroblastoma-amplified_sequence|m.28197; 28883|m.21059; PMI_016828	S162; S208; S522	NBAS_DANRE_Neuroblastoma-amplified_sequence; XP_022105886.1 neuroblastoma-amplified sequence-like [Acanthaster planci] (id=84.48%; len=1205; e=0.00E+00) ; XP_022105886.1 neuroblastoma-amplified sequence-like [Acanthaster planci] (id=81.35%; len=311; e=2.75E-155)	KRRRIPSDRDHDD; KRRRIPSDRDHDD; KRRRIPSDRDHDD	3,4	2.31	0.5013	0.019899	1	2	3	3		S162; S208; S522	0.102388	0.363545	0.424758	0.469443	0.730689	1	0.978695	0.000676018	FC
PMI_004261; 77273|m.51780; Pmi_667430_CCD40_HUMAN_Coiled-coil_domain-containing_protein_40|m.30665	S290; S20; S224	XP_022093548.1 coiled-coil domain-containing protein 40-like isoform X1 [Acanthaster planci] (id=77.65%; len=1244; e=0.00E+00) ; XP_022093549.1 coiled-coil domain-containing protein 40-like isoform X2 [Acanthaster planci] (id=90.05%; len=965; e=0.00E+00) ; CCD40_HUMAN_Coiled-coil_domain-containing_protein_40	SSLTRRSPLAEQD; SSLTRRSPLAEQD; SSLTRRSPLAEQD	2,3,4	4.185	0.6507	0.011517	1	8	5	7	4	S290; S20; S224	0.0957329	0.396385	0.824781	0.887904	0.788409	1	0.979381	0.000633334	FC	0.256877	0.303572	0.940551	0.118476	0.00105608
Pmi_630900_TICRR_XENLA_Treslin|m.20660; PMI_016711	T331; T624	TICRR_XENLA_Treslin; XP_022111195.1 treslin-like [Acanthaster planci] (id=59.82%; len=1364; e=0.00E+00)	RIAGKVTPPPSNK; RIAGKVTPPPSNK	5	2.424	0.5569	0.133805	1	1	1	1		T331; T624	0.0772713	0.514434	0.63102	0.704302	0.567073	1	0.939525	0.00537521	FC
10176|m.6172; 10178|m.6175	T54; T54	XP_022109079.1 F-actin-methionine sulfoxide oxidase MICAL3-like isoform X5 [Acanthaster planci] (id=61.79%; len=280; e=7.44E-85) ; XP_022109064.1 F-actin-methionine sulfoxide oxidase MICAL3-like isoform X3 [Acanthaster planci] (id=63.21%; len=280; e=1.13E-90)	QDPVAKTPEAPRP; QDPVAKTPEAPRP	3,4,5	3.47	0.6855	0.005119	1	7	10	8	5	T54; T54	0.129111	0.898084	0.943524	0.907835	0.934914	0.990631	0.981434	0.000513857	FC	0.215725	0.325306	0.973204	0.00112527	0.0001921
PMI_003745; Pmi_661510_EPS8_MOUSE_Epidermal_growth_factor_receptor_kinase_substrate_8|m.28796	S334; S237	XP_022095027.1 epidermal growth factor receptor kinase substrate 8-like protein 2 isoform X4 [Acanthaster planci] (id=76.39%; len=377; e=3.32E-172) ; EPS8_MOUSE_Epidermal_growth_factor_receptor_kinase_substrate_8	SMPTRNSESDEPL; SMPTRNSESDEPL	3	2.967	0.7715	0.233013	0.99999	2	2	2	1	S334; S237	0.0937354	0.165218	0.528065	0.667148	0.840707	1	0.986596	0.000268307	FC	0.210631	0.275438	0.910785	0.133807	0.00309671
Pmi_493220_no_annot|m.5840; PMI_012647	S106; S45	no_annot; XP_022092771.1 uncharacterized protein LOC110980418 isoform X4 [Acanthaster planci] (id=82.04%; len=1342; e=0.00E+00)	SVDLNKSLPATFE; SVDLNKSLPATFE	3	2.268	0.581	0.139294	1	2	1	2	1	S106; S45	0.114194	0.72147	0.679411	0.668887	0.661364	1	0.966274	0.001687	FC	0.210563	0.557523	0.901122	0.0347759	0.00639416
PMI_018839	S895:S897:S902	XP_022086433.1 DNA excision repair protein ERCC-6-like [Acanthaster planci] (id=75.65%; len=1388; e=0.00E+00)	LGTIEDSDSEVTT,TIEDSDSEVTTSP,DSEVTTSPQLRSE	3	2.059	0.325	0.085685	0.98637	1	1	2		S895:S897:S902	0.166296	0.497477	0.652813	0.594121	0.730625	1	0.830018	0.040885	FC
PMI_029451; Pmi_639992_no_annot|m.22691	S376:S379; S400:S403	XP_022079315.1 neurabin-1-like isoform X6 [Acanthaster planci] (id=78.71%; len=620; e=0.00E+00) ; no_annot	NRKSPVSPTSPIA,SPVSPTSPIAKKP; NRKSPVSPTSPIA,SPVSPTSPIAKKP	2,3	3.566	0.5893	0.032541	0.99832	8	7	6	5	S376:S379; S400:S403	0.100788	0.76633	0.886461	0.772115	0.691797	1	0.986946	0.000254515	FC	0.139347	0.271111	0.987833	0.00587453	4.21449e-05
Pmi_612910_REPS1_MOUSE_RalBP1-associated_Eps_domain-containing_protein_1|m.17183; 18442|m.12986	S283:S291; S71:S79	REPS1_MOUSE_RalBP1-associated_Eps_domain-containing_protein_1; XP_022098199.1 ralBP1-associated Eps domain-containing protein 1-like [Acanthaster planci] (id=89.91%; len=218; e=1.16E-137)	TQSLDNSMNNTLD,NNTLDTSWAKFPE; TQSLDNSMNNTLD,NNTLDTSWAKFPE	4	5.093	0.4136	0.143993	0.99657	1	1	1		S283:S291; S71:S79	0.154295	0.878491	0.723279	0.840176	0.759273	0.995423	0.984608	0.000353533	FC
PMI_022588	T204:S206	AGM90571.1 diaphanous formin [Patiria pectinifera] (id=66.85%; len=552; e=0.00E+00)	GGRGPFTPSPVAE,RGPFTPSPVAELP	2,3	3.747	0.7152	0.104569	1	3	3	4	7	T204:S206	0.0932167	0.2894	0.915338	0.814153	0.847495	0.986507	0.996051	2.33589e-05	FC	0.129024	0.163915	0.962064	0.122526	0.00053025
PMI_008217; Pmi_646401_KTN1_HUMAN_Kinectin|m.24357; 79395|m.53291; 79389|m.53271; 79394|m.53288; 79391|m.53276; 79387|m.53264; 79386|m.53259; 79398|m.53301; 79393|m.53285	S201; S57; S281; S288; S313; S288; S281; S280; S287; S314	XP_022105275.1 ribosome-binding protein 1-like isoform X6 [Acanthaster planci] (id=78.42%; len=329; e=2.12E-110) ; KTN1_HUMAN_Kinectin; XP_022105257.1 ribosome-binding protein 1-like isoform X4 [Acanthaster planci] (id=78.91%; len=1048; e=0.00E+00) ; XP_022105249.1 ribosome-binding protein 1-like isoform X3 [Acanthaster planci] (id=78.69%; len=1037; e=0.00E+00) ; XP_022105266.1 ribosome-binding p…	PAKTQTSPKPTQK; PAKTQTSPKPTQK; PAKTQTSPKPTQK; PAKTQTSPKPTQK; PAKTQTSPKPTQK; PAKTQTSPKPTQK; PAKTQTSPKPTQK; PAKTQTSPKPTQK; PAKTQTSPKPTQK; PAKTQTSPKPTQK	2,3,4	2.037	0.5395	0.116629	0.99806	6	7	10	1	S201; S57; S281; S288; S313; S288; S281; S280; S287; S314	0.105837	0.705491	0.864125	0.812901	0.708485	1	0.980925	0.000542311	FC	0.182431	0.257293	0.961842	0.0628444	0.000157867
PMI_015190	S309:S319	XP_022094723.1 uncharacterized protein LOC110981448 [Acanthaster planci] (id=50.77%; len=518; e=1.49E-133)	IQDAPASPDVSSG,SSGLDKSEHLEDD	4	3.871	0.6772	0.168706	0.99995	1	1	2		S309:S319	0.0642001	0.360232	0.852358	0.786277	0.923616	1	0.993174	6.97371e-05	FC
52772|m.35012; PMI_009884; Pmi_665921_no_annot|m.30214	S100; S1319; S93	XP_022097998.1 trithorax group protein osa-like isoform X3 [Acanthaster planci] (id=76.64%; len=137; e=8.34E-40) ; XP_022097990.1 trithorax group protein osa-like isoform X2 [Acanthaster planci] (id=59.77%; len=1469; e=0.00E+00) ; no_annot	GSAGRHSPVNQLA; GSAGRHSPVNQLA; GSAGRHSPVNQLA	2	2.179	0.5709	0.130967	1	2	2	2	1	S100; S1319; S93	0.0971679	0.71013	0.90522	0.887909	0.716491	0.9581	0.936697	0.00588405	FC	0.145056	0.173741	0.913196	0.421807	0.00189717
PMI_025503; Pmi_590110_S35E2_MOUSE_Solute_carrier_family_35_member_E2|m.13782; PMI_001827	S434; S459; S459	XP_022109289.1 solute carrier family 35 member E2-like [Acanthaster planci] (id=77.50%; len=471; e=0.00E+00) ; S35E2_MOUSE_Solute_carrier_family_35_member_E2; XP_022109289.1 solute carrier family 35 member E2-like [Acanthaster planci] (id=81.95%; len=471; e=0.00E+00)	GSIPLSSPV----; GSIPLSSPV----; GSIPLSSPV----	2,3	3.82	0.7603	0.047035	1	3	4	3	1	S434; S459; S459	0.122319	0.291695	0.848607	0.86708	0.842468	1	0.991843	9.95244e-05	FC	0.033849	0.109847	0.911946	0.00350042	0.00464733
Pmi_538430_no_annot|m.8685; PMI_016314	S246; S466	no_annot; XP_022105783.1 verprolin-like [Acanthaster planci] (id=78.84%; len=553; e=0.00E+00)	TPITQHSPGIINA; TPITQHSPGIINA	3,4	3.264	0.7233	0.546058	1	3	1	1	2	S246; S466	0.105431	0.381172	0.36702	0.891016	0.892087	0.981716	0.954836	0.00301363	FC	0.476224	0.770818	0.957081	0.0352834	0.00127985
PMI_003522; 17274|m.11899; Pmi_640650_SSBP3_RAT_Single-stranded_DNA-binding_protein_3|m.22915; PMI_027518	S30; S105; S382; S81	XP_022100259.1 single-stranded DNA-binding protein 3-like isoform X15 [Acanthaster planci] (id=97.00%; len=100; e=3.42E-59) ; XP_022100254.1 single-stranded DNA-binding protein 3-like isoform X10 [Acanthaster planci] (id=97.71%; len=175; e=3.33E-110) ; SSBP3_RAT_Single-stranded_DNA-binding_protein_3; XP_022100259.1 single-stranded DNA-binding protein 3-like isoform X15 [Acanthaster planci] (id=97…	MDGLPKSSPASNQ; MDGLPKSSPASNQ; MDGLPKSSPASNQ; MDGLPKSSPASNQ	2	2.464	0.7569	0.184353	0.99999	1	1	1		S30; S105; S382; S81	0.112591	0.373759	0.332024	0.596439	0.500785	1	0.967709	0.00154721	FC
Pmi_631760_BRD8_MOUSE_Bromodomain-containing_protein_8|m.20872	S531	BRD8_MOUSE_Bromodomain-containing_protein_8	PTRKSMSPEEQKL	2,3	2.031	0.5372	0.184989	1	3	4	4	2	S531	0.121116	0.749325	0.922299	0.884089	0.839045	0.999056	0.988206	0.000207816	FC	0.305921	0.401005	0.956279	0.0856823	0.000876876
PMI_016078; Pmi_539900_no_annot|m.8786; PMI_009989	T370; T306; T336	XP_022093776.1 WD repeat-containing protein 44-like [Acanthaster planci] (id=89.70%; len=602; e=0.00E+00) ; no_annot; XP_022093776.1 WD repeat-containing protein 44-like [Acanthaster planci] (id=76.63%; len=398; e=4.80E-130)	KGSKGGTPETDVL; KGSKGGTPETDVL; KGSKGGTPETDVL	2,3	5.517	0.7714	0.142887	1	3	3	3	2	T370; T306; T336	0.129239	0.365882	0.855215	0.687821	0.769555	1	0.952797	0.00328962	FC	0.102615	0.133753	0.909441	0.284748	0.00262079
PMI_008802	S10	XP_022103098.1 DCN1-like protein 4 [Acanthaster planci] (id=90.50%; len=242; e=1.04E-145)	RRKRKLSSAEDET	2,3	2.019	0.568	0.25313	1	4	3	3	2	S10	0.113387	0.878192	0.967999	0.876299	0.75309	0.990587	0.986061	0.0002901	FC	0.309454	0.622327	0.964608	0.00653359	1.42483e-05
PMI_005861; Pmi_666850_TMF1_MOUSE_TATA_element_modulatory_factor|m.30463; 16363|m.11083	S79; S83; S32	XP_022093565.1 TATA element modulatory factor-like isoform X2 [Acanthaster planci] (id=57.67%; len=352; e=4.37E-99) ; TMF1_MOUSE_TATA_element_modulatory_factor; XP_022093565.1 TATA element modulatory factor-like isoform X2 [Acanthaster planci] (id=70.02%; len=567; e=0.00E+00)	SKNDTLSPSSSKS; SKNDTLSPSSSKS; SKNDTLSPSSSKS	2,3,4	2.18	0.5244	0.137567	1	4	4	2	1	S79; S83; S32	0.133897	0.77189	0.967253	0.91926	0.814813	0.984798	0.973089	0.00107656	FC	0.114801	0.220823	0.954441	0.000322214	0.000454031
PMI_024209; 64749|m.43081; Pmi_632120_TCPG_BOVIN_T-complex_protein_1_subunit_gamma|m.20912; PMI_019343	S196; S194; S255; S286	XP_022105850.1 T-complex protein 1 subunit gamma-like [Acanthaster planci] (id=59.32%; len=381; e=2.56E-136) ; XP_022105850.1 T-complex protein 1 subunit gamma-like [Acanthaster planci] (id=94.05%; len=487; e=0.00E+00) ; TCPG_BOVIN_T-complex_protein_1_subunit_gamma; XP_022105850.1 T-complex protein 1 subunit gamma-like [Acanthaster planci] (id=66.27%; len=590; e=0.00E+00)	EYKKGESQTSLEI; EYKKGESQTSLEI; EYKKGESQTSLEI; EYKKGESQTSLEI	3,4	1.81	0.5746	0.536307	0.99999	2	1	1	4	S196; S194; S255; S286	0.153432	0.267826	0.859292	0.92894	0.825726	0.995855	0.973061	0.00107881	FC	0.228071	0.308578	0.974379	0.00658462	9.12604e-06
74301|m.49642; PMI_009936; PMI_009469	S102; S409; S217	XP_022103384.1 protein LSM14 homolog A-like isoform X2 [Acanthaster planci] (id=81.14%; len=228; e=3.36E-93) ; XP_022103383.1 protein LSM14 homolog A-like isoform X1 [Acanthaster planci] (id=64.07%; len=540; e=0.00E+00) ; XP_022103383.1 protein LSM14 homolog A-like isoform X1 [Acanthaster planci] (id=70.33%; len=364; e=6.63E-140)	GNETQPSDAPEEE; GNETQPSDAPEEE; GNETQPSDAPEEE	3,4,5	5.604	0.7982	0.053042	1	7	6	4	3	S102; S409; S217	0.176773	0.758341	0.778471	0.795941	0.616942	0.893535	0.804443	0.0536245	FC	0.831038	0.743969	0.919542	0.537659	0.453385
PMI_008007; Pmi_669602_INCE_HUMAN_Inner_centromere_protein|m.31527; 81692|m.54875	T506; T506; T527	XP_022102002.1 inner centromere protein A-like [Acanthaster planci] (id=73.61%; len=1171; e=0.00E+00) ; INCE_HUMAN_Inner_centromere_protein; XP_022102002.1 inner centromere protein A-like [Acanthaster planci] (id=68.90%; len=820; e=0.00E+00)	SLNKIKTPENDTK; SLNKIKTPENDTK; SLNKIKTPENDTK	2,3	1.672	0.64	0.089152	1	4	2	3	1	T506; T506; T527	0.101366	0.428741	0.924937	0.712335	0.704653	0.96831	0.889677	0.0175854	FC	0.461511	0.438174	0.936178	0.722608	0.00453688
Pmi_533110_HPS4_HUMAN_Hermansky-Pudlak_syndrome_4_protein|m.8237	S246	HPS4_HUMAN_Hermansky-Pudlak_syndrome_4_protein	FCTPPSSPTEKSN	3	3.508	0.6595	0.234583	0.99999	1	1	1	1	S246	0.10608	0.166459	0.118631	0.640354	0.528256	1	0.99765	8.2754e-06	FC	0.69734	0.931123	0.750126	0.0174674	0.200867
26418|m.19729; Pmi_664101_DCTN1_HUMAN_Dynactin_subunit_1|m.29564	T664; T792	XP_022080740.1 dynactin subunit 1-like isoform X1 [Acanthaster planci] (id=92.10%; len=937; e=0.00E+00) ; DCTN1_HUMAN_Dynactin_subunit_1	AGSLADTPEKDKE; AGSLADTPEKDKE	3,4,5	2.65	0.601	0.081998	1	2	5	3	6	T664; T792	0.125073	0.461771	0.749127	0.741849	0.666987	1	0.991247	0.000114581	FC	0.19209	0.224772	0.982462	0.000583334	8.61626e-05
85114|m.56902; 85118|m.56908; Pmi_618340_MED11_XENLA_Mediator_of_RNA_polymerase_II_transcription_s..CUT|m.18168	S116; S115; S116	EKC20459.1 hypothetical protein CGI_10006041 [Crassostrea gigas] (id=23.91%; len=297; e=8.44E-08) ; EKC20459.1 hypothetical protein CGI_10006041 [Crassostrea gigas] (id=23.91%; len=297; e=9.58E-08) ; MED11_XENLA_Mediator_of_RNA_polymerase_II_transcription_s..CUT	EEETTSSVDLEDA; EEETTSSVDLEDA; EEETTSSVDLEDA	3,4	3.844	0.6896	0.753089	1	2	1	1		S116; S115; S116	0.151953	0.302768	0.601746	0.72881	0.67679	1	0.987844	0.000220772	FC
Pmi_626860_SPEF2_HUMAN_Sperm_flagellar_protein_2|m.19849; 3613|m.1945; PMI_001182	T182:S184; T108:S110; T1846:S1848	SPEF2_HUMAN_Sperm_flagellar_protein_2; XP_022100241.1 sperm flagellar protein 2-like isoform X2 [Acanthaster planci] (id=90.84%; len=131; e=1.28E-61) ; XP_022100240.1 sperm flagellar protein 2-like isoform X1 [Acanthaster planci] (id=76.03%; len=1481; e=0.00E+00)	EVKVFRTPSPPPR,KVFRTPSPPPRPS; EVKVFRTPSPPPR,KVFRTPSPPPRPS; EVKVFRTPSPPPR,KVFRTPSPPPRPS	3,4	5.011	0.6672	0.062873	0.99993	6	3	5	3	T182:S184; T108:S110; T1846:S1848	0.0989131	0.553976	0.892679	0.789162	0.755456	1	0.984869	0.00034167	FC	0.282475	0.311424	0.954348	0.252543	6.51676e-05
Pmi_638790_CENPJ_HUMAN_Centromere_protein_J|m.22410; 24090|m.18320	S1185:S1186; S294:S295	CENPJ_HUMAN_Centromere_protein_J; ANN83878.1 CPAP, partial [Patiria miniata] (id=96.81%; len=314; e=0.00E+00)	ESRTLESSEDDTP,SRTLESSEDDTPL; ESRTLESSEDDTP,SRTLESSEDDTPL	3	3.266	0.7116	0.897407	0.99529	1	1	1		S1185:S1186; S294:S295	0.158377	0.295731	0.871266	0.716401	0.670334	1	0.918756	0.00963276	FC
PMI_023029	T31	XP_022098703.1 mannose-6-phosphate isomerase-like isoform X1 [Acanthaster planci] (id=85.60%; len=507; e=0.00E+00)	ADAPPATPPAAEA	3,4,5	5.143	0.7551	0.004324	1	11	11	11	11	T31	0.13159	0.254818	0.669865	0.770089	0.781771	1	0.996166	2.20228e-05	FC	0.0980747	0.177724	0.98236	0.000532312	9.31953e-06
Pmi_551393_AB1IP_CHICK_Amyloid_beta_A4_precursor_protein-binding_fami..CUT|m.9723	S58	AB1IP_CHICK_Amyloid_beta_A4_precursor_protein-binding_fami..CUT	SPRTPMSPGQTPY	2,3	2.903	0.5925	0.148369	1	3	1	1	5	S58	0.110069	0.691343	0.601121	0.342148	0.75993	1	0.89487	0.0159975	FC	0.45561	0.553772	0.903143	0.0522516	0.00836197
Pmi_650841_BPL1_HUMAN_Biotin--protein_ligase|m.25511; 21054|m.15682	S3; S3	BPL1_HUMAN_Biotin--protein_ligase; XP_022103513.1 biotin--protein ligase-like isoform X1 [Acanthaster planci] (id=78.78%; len=622; e=0.00E+00)	----HRSPSGNSL; ----HRSPSGNSL	2,3	1.891	0.4913	0.028969	0.99999	3	2	4		S3; S3	0.0828685	0.483746	0.575357	0.608604	0.556787	1	0.976149	0.000846521	FC
77667|m.52100; 77666|m.52092; 77660|m.52074; 77652|m.52054; 77661|m.52082	S1240; S1151; S1295; S1206; S564	XP_022097945.1 vesicle-associated protein-like, partial [Acanthaster planci] (id=71.09%; len=640; e=0.00E+00) ; XP_022097945.1 vesicle-associated protein-like, partial [Acanthaster planci] (id=67.66%; len=535; e=6.52E-175) ; XP_022097945.1 vesicle-associated protein-like, partial [Acanthaster planci] (id=71.09%; len=640; e=0.00E+00) ; XP_022097945.1 vesicle-associated protein-like, partial [Acant…	HKHGKVSGDLPEV; HKHGKVSGDLPEV; HKHGKVSGDLPEV; HKHGKVSGDLPEV; HKHGKVSGDLPEV	3,4	2.789	0.5121	0.371308	1	2	2	1		S1240; S1151; S1295; S1206; S564	0.139571	0.231967	0.573335	0.653262	0.677043	1	0.963428	0.00198176	FC
PMI_020892; Pmi_635650_OSBL8_HUMAN_Oxysterol-binding_protein-related_protein_8|m.21722; PMI_019974	S267; S265; S148	XP_022082788.1 oxysterol-binding protein-related protein 8-like isoform X2 [Acanthaster planci] (id=89.29%; len=756; e=0.00E+00) ; OSBL8_HUMAN_Oxysterol-binding_protein-related_protein_8; XP_022082787.1 oxysterol-binding protein-related protein 8-like isoform X1 [Acanthaster planci] (id=88.36%; len=756; e=0.00E+00)	EKGLNESEIENTH; EKGLNESEIENTH; EKGLNESEIENTH	2,3	2.97	0.7072	0.141995	1	8	6	4	3	S267; S265; S148	0.138639	0.481545	0.802168	0.825831	0.75788	1	0.989485	0.000165271	FC	0.289997	0.407005	0.939255	0.000410574	0.00137021
38112|m.26197; PMI_018839; Pmi_637260_ERC6L_DANRE_DNA_excision_repair_protein_ERCC-6-like|m.22097	T427; T999; T998	XP_022086433.1 DNA excision repair protein ERCC-6-like [Acanthaster planci] (id=77.98%; len=445; e=0.00E+00) ; XP_022086433.1 DNA excision repair protein ERCC-6-like [Acanthaster planci] (id=75.65%; len=1388; e=0.00E+00) ; ERC6L_DANRE_DNA_excision_repair_protein_ERCC-6-like	RSRISQTPQSEGR; RSRISQTPQSEGR; RSRISQTPQSEGR	2	2.384	0.5495	0.311247	0.99999	1	1	1	1	T427; T999; T998	0.131298	0.236055	0.202317	0.415259	0.347253	1	0.994098	5.21393e-05	FC	0.823307	0.974438	0.56143	0.00397768	8.75145e-05
PMI_001149; Pmi_653760_RBEL1_MOUSE_Rab-like_protein_1|m.26302	T281; T345	XP_022085387.1 rab-like protein 6 [Acanthaster planci] (id=66.92%; len=653; e=0.00E+00) ; RBEL1_MOUSE_Rab-like_protein_1	TSRKETTPTPEQT; TSRKETTPTPEQT	3	1.789	0.4741	0.051756	0.99736	1	1	2		T281; T345	0.111736	0.601952	0.715504	0.830308	0.736758	1	0.979778	0.000609276	FC
Pmi_669941_RPF2_BOVIN_Ribosome_production_factor_2_homolog|m.31688	S51	RPF2_BOVIN_Ribosome_production_factor_2_homolog	RQPSAFSPVTPRM	2	1.611	0.5385	1.09618	1	1	2	1		S51	0.110008	0.266113	0.394772	0.720175	0.862982	1	0.993062	7.20289e-05	FC
PMI_008117; Pmi_402530_no_annot|m.2888	S666:S668:S680; S67:S69:S81	XP_022101207.1 nischarin-like isoform X3 [Acanthaster planci] (id=77.62%; len=983; e=0.00E+00) ; no_annot	RKPRSRSRSPAPP,PRSRSRSPAPPEI,IQQPPASPTLKIS; RKPRSRSRSPAPP,PRSRSRSPAPPEI,IQQPPASPTLKIS	3,4,5	3.062	0.6267	0.04802	1	11	6	9	7	S666:S668:S680; S67:S69:S81	0.128194	0.910163	0.90637	0.950151	0.921264	0.976526	0.986566	0.000269485	FC	0.143497	0.255051	0.97608	0.0030281	6.48551e-05
PMI_019742; Pmi_614400_SPN90_HUMAN_NCK-interacting_protein_with_SH3_domain|m.17415	S152; S152	XP_022081462.1 NCK-interacting protein with SH3 domain-like [Acanthaster planci] (id=75.85%; len=646; e=0.00E+00) ; SPN90_HUMAN_NCK-interacting_protein_with_SH3_domain	TQTTSKSPPPSST; TQTTSKSPPPSST	3,4	2.93	0.514	0.026149	0.96576	2	1	1		S152; S152	0.0400206	0.360573	0.831906	0.802673	0.83179	1	0.963843	0.00193732	FC
85426|m.57088	S371	XP_022091038.1 ankyrin repeat and KH domain-containing protein mask-like isoform X2 [Acanthaster planci] (id=81.19%; len=436; e=2.74E-156)	SATTTPSPVTMAT	3,4	4.984	0.7692	0.294347	0.99998	6	5	6	5	S371	0.108296	0.818584	0.895612	0.861395	0.833667	0.995193	0.933042	0.00657495	FC	0.246486	0.226079	0.73552	0.719325	0.0537332
PMI_011395	S19	XP_022091061.1 protein archease-like [Acanthaster planci] (id=54.45%; len=202; e=6.26E-56)	QEPDVASPENQER	2,3	4.529	0.6004	0.157352	1	3	2	2		S19	0.195817	0.4368	0.779419	0.825248	0.723228	1	0.968143	0.00150611	FC
PMI_009181; Pmi_669340_EIF3A_XENTR_Eukaryotic_translation_initiation_factor_3_su..CUT|m.31454	S908; S958	XP_022086480.1 eukaryotic translation initiation factor 3 subunit A-like [Acanthaster planci] (id=88.06%; len=1047; e=0.00E+00) ; EIF3A_XENTR_Eukaryotic_translation_initiation_factor_3_su..CUT	RAEPLRSEEAKEG; RAEPLRSEEAKEG	3,4	1.967	0.4156	0.142469	1	1	1	2	1	S908; S958	0.0947116	0.223301	0.844388	0.970174	0.97122	0.985955	0.997522	9.20488e-06	FC	0.187124	0.278685	0.892147	0.00529726	0.00480842
PMI_026020; Pmi_639991_NEB2_HUMAN_Neurabin-2|m.22686	S355:S358; S820:S823	XP_022079313.1 uncharacterized protein LOC110973105 isoform X4 [Acanthaster planci] (id=70.00%; len=510; e=2.54E-177) ; NEB2_HUMAN_Neurabin-2	QHQREPSPSSPRI,REPSPSSPRIEGT; QHQREPSPSSPRI,REPSPSSPRIEGT	3,4	4.851	0.7353	0.029296	0.99683	2	1	1	2	S355:S358; S820:S823	0.116852	0.855531	0.964068	0.82577	0.758804	0.9665	0.984604	0.000353737	FC	0.557661	0.735846	0.853101	0.349323	0.000935533
PMI_005134	S185	XP_022091095.1 ras-related protein Rab-32-like isoform X3 [Acanthaster planci] (id=96.74%; len=215; e=1.24E-152)	ILANDKSISHEDR	4	4.574	0.6944	0.270725	0.99715	1	2	1	1	S185	0.153619	0.29524	0.606503	0.736238	0.678781	1	0.994705	4.19793e-05	FC	0.601592	0.61654	0.960683	0.893705	0.00173329
Pmi_668691_SPAS2_HUMAN_Spermatogenesis-associated_serine-rich_protein_2|m.31138; PMI_019245	S124:T127; S314:T317	SPAS2_HUMAN_Spermatogenesis-associated_serine-rich_protein_2; XP_022109375.1 SPATS2-like protein isoform X1 [Acanthaster planci] (id=70.52%; len=519; e=0.00E+00)	TPATPTSPTTPDA,TPTSPTTPDADMD; TPATPTSPTTPDA,TPTSPTTPDADMD	3,4	4.157	0.2877	0.210019	0.99634	2	1	3		S124:T127; S314:T317	0.0922838	0.370266	0.41766	0.451904	0.655604	1	0.93935	0.00540609	FC
PMI_010121; Pmi_666630_STK31_MOUSE_Serine/threonine-protein_kinase_31|m.30412; PMI_016316	S220; S388; S381	XP_011670570.1 PREDICTED: serine/threonine-protein kinase 31, partial [Strongylocentrotus purpuratus] (id=34.01%; len=738; e=4.37E-106) ; STK31_MOUSE_Serine/threonine-protein_kinase_31; XP_011670570.1 PREDICTED: serine/threonine-protein kinase 31, partial [Strongylocentrotus purpuratus] (id=32.99%; len=785; e=4.38E-102)	PNTSRGSPTPGNS; PNTSRGSPTPGNS; PNTSRGSPTPGNS	2	1.747	0.5352	0.05087	0.99999	2	1	1		S220; S388; S381	0.133576	0.746621	0.832375	0.772665	0.713004	1	0.951464	0.00347649	FC
Pmi_641483_KIFA3_STRPU_Kinesin-associated_protein_3|m.23098; 51885|m.34510	S293; S291	KIFA3_STRPU_Kinesin-associated_protein_3; XP_022085406.1 kinesin-associated protein 3-like [Acanthaster planci] (id=97.06%; len=647; e=0.00E+00)	RKAAEESPQAKKD; RKAAEESPQAKKD	2,3	1.96	0.414	0.057614	1	1	2	1		S293; S291	0.145874	0.413231	0.781039	0.837153	0.715685	1	0.981346	0.000518715	FC
Pmi_580560_ADRB1_SHEEP_Beta-1_adrenergic_receptor|m.12596; PMI_023158; PMI_022789	S281; S279; S104	ADRB1_SHEEP_Beta-1_adrenergic_receptor; XP_022087348.1 delta-type opioid receptor-like isoform X1 [Acanthaster planci] (id=85.71%; len=385; e=0.00E+00) ; XP_022087349.1 delta-type opioid receptor-like isoform X2 [Acanthaster planci] (id=87.50%; len=208; e=7.38E-130)	GRERRRSGPTQLM; GRERRRSGPTQLM; GRERRRSGPTQLM	2,3,4	3.172	0.5938	0.038031	1	16	11	12	12	S281; S279; S104	0.123196	0.491239	0.854687	0.7891	0.73282	1	0.981052	0.000535125	FC	0.167073	0.355398	0.983543	0.00410538	1.05083e-05
PMI_004054	S373	XP_022098777.1 regulator of nonsense transcripts 2-like [Acanthaster planci] (id=87.92%; len=1267; e=0.00E+00)	SSKSDASPPDTRE	2,3	1.242	0.4777	0.165301	0.99999	1	1	1	1	S373	0.154037	0.588035	0.930001	0.888119	0.728725	0.990053	0.931771	0.00682391	FC	0.370989	0.46263	0.848647	0.493334	0.0244079
Pmi_506522_HERC2_MOUSE_E3_ubiquitin-protein_ligase_HERC2|m.6510; PMI_002331	S123; S197	HERC2_MOUSE_E3_ubiquitin-protein_ligase_HERC2; XP_022098915.1 E3 ubiquitin-protein ligase HERC2-like [Acanthaster planci] (id=90.32%; len=2583; e=0.00E+00)	QKEEEGSPVKTRS; QKEEEGSPVKTRS	3,4	1.335	0.4539	0.03668	1	1	1	1	1	S123; S197	0.127953	0.578074	0.891778	0.841804	0.752959	0.984516	0.963646	0.00195835	FC	0.285671	0.33759	0.966842	0.113352	0.00142109
Pmi_637080_COBL1_HUMAN_Cordon-bleu_protein-like_1|m.22060; 45168|m.30334	S29; S29	COBL1_HUMAN_Cordon-bleu_protein-like_1; XP_022099079.1 cordon-bleu protein-like 1 isoform X4 [Acanthaster planci] (id=70.87%; len=563; e=0.00E+00)	PPTKKPSFEENKN; PPTKKPSFEENKN	3,4	2.829	0.5616	0.496362	1	1	1	1		S29; S29	0.105813	0.165202	0.828538	0.84375	0.686568	1	0.957302	0.0026957	FC
Pmi_623440_3BP5L_XENTR_SH3_domain-binding_protein_5-like|m.19134; PMI_001776; PMI_005985	S327; S305; S319	3BP5L_XENTR_SH3_domain-binding_protein_5-like; XP_022091227.1 uncharacterized protein LOC110979587 [Acanthaster planci] (id=74.70%; len=498; e=0.00E+00) ; XP_022091227.1 uncharacterized protein LOC110979587 [Acanthaster planci] (id=75.49%; len=510; e=0.00E+00)	LQESDLSPPDPHS; LQESDLSPPDPHS; LQESDLSPPDPHS	3,4	3.177	0.6871	0.145492	1	2	1	3		S327; S305; S319	0.146832	0.660175	0.54356	0.730301	0.667092	1	0.979207	0.00064402	FC
Pmi_507170_no_annot|m.6554	S152:S156	no_annot	RPSPQPSPTGSPA,QPSPTGSPAPQKK	3,4,5	2.474	0.4735	0.216462	0.98294	1	1	2		S152:S156	0.168665	0.412336	0.937872	0.623923	0.890767	0.942757	0.981413	0.00051503	FC
77907|m.52272; PMI_022353; Pmi_649130_TXB1A_DANRE_Tax1-binding_protein_1_homolog_A|m.25062	S45; S834; S313	XP_022087081.1 tax1-binding protein 1-like isoform X2 [Acanthaster planci] (id=80.92%; len=173; e=2.82E-75) ; XP_022087081.1 tax1-binding protein 1-like isoform X2 [Acanthaster planci] (id=76.42%; len=878; e=0.00E+00) ; TXB1A_DANRE_Tax1-binding_protein_1_homolog_A	GTRAVKSPLPEPL; GTRAVKSPLPEPL; GTRAVKSPLPEPL	3,4,5	3.201	0.7231	0.010755	1	3	5	6	3	S45; S834; S313	0.0963364	0.557647	0.95454	0.964975	0.856403	0.977741	0.990339	0.000139558	FC	0.21953	0.288486	0.934917	0.00701607	0.00135578
Pmi_616942_PASK_MOUSE_PAS_domain-containing_serine/threonine-protein..CUT|m.17916	S985	PASK_MOUSE_PAS_domain-containing_serine/threonine-protein..CUT	PSDRECSDPDDES	3	4.986	0.7635	0.430767	1	1	1	1		S985	0.283699	0.438913	0.507984	0.506244	0.538839	1	0.963933	0.00192781	FC
81754|m.54922; 81756|m.54930; PMI_007429; 81758|m.54936; Pmi_671080_RIF1_HUMAN_Telomere-associated_protein_RIF1|m.32102; 81755|m.54926; PMI_008421	S19; S19; S395; S19; S1098; S19; S344	XP_022090787.1 telomere-associated protein RIF1-like [Acanthaster planci] (id=62.19%; len=804; e=0.00E+00) ; XP_022090785.1 telomere-associated protein RIF1-like isoform X1 [Acanthaster planci] (id=56.33%; len=490; e=1.14E-130) ; XP_022090785.1 telomere-associated protein RIF1-like isoform X1 [Acanthaster planci] (id=66.28%; len=860; e=0.00E+00) ; XP_022090786.1 telomere-associated protein RIF1-l…	KGKRDGSPAVGGA; KGKRDGSPAVGGA; KGKRDGSPAVGGA; KGKRDGSPAVGGA; KGKRDGSPAVGGA; KGKRDGSPAVGGA; KGKRDGSPAVGGA	2	2.245	0.6717	0.135029	1	3	2	2	1	S19; S19; S395; S19; S1098; S19; S344	0.130887	0.772183	0.898678	0.338021	0.639243	0.967992	0.964419	0.00187645	FC	0.228351	0.329948	0.968048	0.00925994	7.09485e-05
PMI_028439	S45:S57	XP_022088408.1 double-stranded RNA-specific editase 1-like isoform X2 [Acanthaster planci] (id=82.25%; len=693; e=0.00E+00)	LRGKKRSLEDEDE,EDMADVSADGQKA	3,4	2.317	0.4508	0.732773	1	1	1	1		S45:S57	0.143207	0.289808	0.612739	0.712932	0.881518	1	0.970485	0.00129381	FC
PMI_005565	S1171	XP_022110175.1 uncharacterized protein LOC110989830 [Acanthaster planci] (id=70.92%; len=1919; e=0.00E+00)	SCTTPTSPAQHYE	3,4	4.976	0.7773	0.017184	1	2	6	5	3	S1171	0.176448	0.402642	0.896946	0.764979	0.822389	0.984875	0.88328	0.0196403	FC	0.383034	0.373346	0.974956	0.865163	0.0020887
PMI_007429	S709	XP_022090785.1 telomere-associated protein RIF1-like isoform X1 [Acanthaster planci] (id=66.28%; len=860; e=0.00E+00)	IPETQQSPSMEMA	3	4.722	0.7015	0.800337	1	2	2	2		S709	0.16968	0.581283	0.675557	0.66479	0.634858	1	0.993231	6.85814e-05	FC
PMI_004197	S166	XP_022086042.1 DDB1- and CUL4-associated factor 8-like [Acanthaster planci] (id=74.52%; len=777; e=0.00E+00)	NNAATKSPGKSRK	2,3,4	4.526	0.7313	0.057633	1	3	4	1		S166	0.146036	0.791663	0.900597	0.775515	0.743842	0.968403	0.984287	0.000368414	FC
PMI_022729; Pmi_595820_IDLC_STRPU_33_kDa_inner_dynein_arm_light_chain,_axonemal|m.14573; PMI_006719	S34; S34; S34	XP_022101463.1 33 kDa inner dynein arm light chain, axonemal [Acanthaster planci] (id=100.00%; len=133; e=1.58E-91) ; IDLC_STRPU_33_kDa_inner_dynein_arm_light_chain,_axonemal; XP_022101463.1 33 kDa inner dynein arm light chain, axonemal [Acanthaster planci] (id=100.00%; len=238; e=1.07E-171)	ARALRTSPQPPTN; ARALRTSPQPPTN; ARALRTSPQPPTN	3,4	6.092	0.7723	0.060805	1	8	9	11	5	S34; S34; S34	0.117311	0.498899	0.923136	0.86327	0.748046	1	0.989994	0.000149686	FC	0.189601	0.210568	0.963037	0.35476	3.50192e-05
Pmi_628860_no_annot|m.20265	S438	no_annot	PKSILKSDSEVSY	3,4	2.044	0.5201	0.113598	0.99999	2	2	1		S438	0.118206	0.17977	0.526182	0.621244	0.668836	1	0.982269	0.000468795	FC
51955|m.34533	S20	XP_022088227.1 MAP kinase-activating death domain protein-like isoform X3 [Acanthaster planci] (id=90.31%; len=392; e=0.00E+00)	GKDERSSPTFLEK	2,4	2.146	0.4798	0.026528	0.99999	3	4	3	4	S20	0.118736	0.715746	0.973183	0.879764	0.750842	0.978276	0.98542	0.000317299	FC	0.19995	0.238677	0.961868	0.130107	0.000368176
PMI_003936	S390	XP_022085688.1 ubiquitin carboxyl-terminal hydrolase 30-like isoform X2 [Acanthaster planci] (id=54.99%; len=431; e=2.89E-131)	GCLGQMSPRLSHN	2,3	4.537	0.7853	0.037853	1	5	4	3		S390	0.0824406	0.336063	0.511138	0.694644	0.689125	1	0.97645	0.000825381	FC
Pmi_645741_GDPD5_HUMAN_Glycerophosphodiester_phosphodiesterase_domai..CUT|m.24197; 35557|m.24837	S537:S540; S537:S540	GDPD5_HUMAN_Glycerophosphodiester_phosphodiesterase_domai..CUT; XP_022098682.1 glycerophosphodiester phosphodiesterase domain-containing protein 5-like isoform X2 [Acanthaster planci] (id=81.21%; len=580; e=0.00E+00)	VNPESISLHSPRH,ESISLHSPRHFAS; VNPESISLHSPRH,ESISLHSPRHFAS	3	1.553	0.4656	0.148675	1	1	1	1		S537:S540; S537:S540	0.0874589	0.533144	0.924657	0.818344	0.780767	0.928336	0.902285	0.0138559	FC
Pmi_510900_FACD2_HUMAN_Fanconi_anemia_group_D2_protein|m.6775; PMI_028753	S10; S10	FACD2_HUMAN_Fanconi_anemia_group_D2_protein; XP_022104968.1 Fanconi anemia group D2 protein-like isoform X1 [Acanthaster planci] (id=69.23%; len=91; e=2.72E-31)	AKTKRKSASTLET; ARTKRKSASTLET	2,3,4	2.626	0.6906	0.121934	1	4	5	6	2	S10; S10	0.109581	0.177989	0.203878	0.938147	0.525868	0.990287	0.995217	3.42553e-05	FC	0.255372	0.595447	0.964242	0.0019676	0.000413016
Pmi_498450_no_annot|m.6101	S28	no_annot	NNSTPGSPIKTSK	2,3	3.052	0.6451	0.002162	1	2	2	2	1	S28	0.142914	0.43687	0.575125	0.662444	0.670462	1	0.958814	0.00250944	FC	0.356285	0.428827	0.902764	0.0388491	0.00422235
Pmi_645190_PERQ2_DANRE_PERQ_amino_acid-rich_with_GYF_domain-containi..CUT|m.24044; PMI_017906; 12176|m.7657	T105; T105; T77	PERQ2_DANRE_PERQ_amino_acid-rich_with_GYF_domain-containi..CUT; XP_022096921.1 GRB10-interacting GYF protein 2-like isoform X4 [Acanthaster planci] (id=68.50%; len=346; e=1.93E-120) ; XP_022096920.1 GRB10-interacting GYF protein 2-like isoform X3 [Acanthaster planci] (id=82.76%; len=87; e=2.41E-39)	AKKEPLTPMALLP; AKKEPLTPMALLP; AKKEPLTPMALLP	3	2.864	0.6568	0.394555	1	1	1	1		T105; T105; T77	0.117241	0.342681	0.733148	0.767588	0.943174	1	0.97203	0.00116252	FC
PMI_014312; 38216|m.26259; PMI_012564	S169; S220; S137	XP_022103683.1 SNW domain-containing protein 1-like [Acanthaster planci] (id=95.88%; len=485; e=0.00E+00) ; XP_022103683.1 SNW domain-containing protein 1-like [Acanthaster planci] (id=95.15%; len=536; e=0.00E+00) ; XP_022103683.1 SNW domain-containing protein 1-like [Acanthaster planci] (id=74.77%; len=535; e=0.00E+00)	IPRGPPSPPAPVM; IPRGPPSPPAPVM; IPRGPPSPPAPVM	3,4	1.739	0.5274	0.09735	1	6	3	3	2	S169; S220; S137	0.138252	0.143285	0.153912	0.600493	0.453746	1	0.990847	0.00012528	FC	0.844952	0.97234	0.849165	0.00541675	0.946438
Pmi_584860_no_annot|m.13085; 86228|m.57489	S6; S6	no_annot; XP_022098520.1 uncharacterized protein LOC110983520 [Acanthaster planci] (id=70.30%; len=101; e=6.25E-35)	-MDRKPSDQPGIL; -MDRKPSDQPGIL	3,4	4.69	0.6837	0.899555	1	1	2	1		S6; S6	0.12359	0.251855	0.668823	0.794901	0.777112	1	0.982571	0.000452985	FC
PMI_021358; 33942|m.24002	S9; S9	XP_022101933.1 choline-phosphate cytidylyltransferase A-like [Acanthaster planci] (id=87.05%; len=332; e=0.00E+00) ; XP_022101933.1 choline-phosphate cytidylyltransferase A-like [Acanthaster planci] (id=87.61%; len=331; e=0.00E+00)	VKRKRNSLNENDI; VKRKRNSLNENDI	3,4,5	4.89	0.7764	0.042603	1	14	13	12	12	S9; S9	0.123117	0.442699	0.820308	0.875477	0.831766	1	0.978493	0.000688879	FC	0.113282	0.254835	0.983913	0.00597954	0.000135833
PMI_001303; Pmi_580180_NCF2_BOVIN_Neutrophil_cytosol_factor_2|m.12552; 62253|m.41150	S528:S533:T540; S482:S487:T494; S489:S494:T501	XP_022109796.1 uncharacterized protein LOC110989599 isoform X1 [Acanthaster planci] (id=62.41%; len=713; e=0.00E+00) ; NCF2_BOVIN_Neutrophil_cytosol_factor_2; XP_022109796.1 uncharacterized protein LOC110989599 isoform X1 [Acanthaster planci] (id=72.61%; len=482; e=0.00E+00)	NKPVPPSPNRLSP,PSPNRLSPGMPNR,PGMPNRTPPPIPS; NKPVPPSPNRLSP,PSPNRLSPGMPNR,PGMPNRTPPPIPS; NKPVPPSPNRLSP,PSPNRLSPGMPNR,PGMPNRTPPPIPS	5	2.721	0.4881	0.510943	1	1	1	1		S528:S533:T540; S482:S487:T494; S489:S494:T501	0.053331	0.333357	0.789294	0.889918	0.853125	0.934141	0.913736	0.0108413	FC
Pmi_616010_YES_CHICK_Tyrosine-protein_kinase_Yes|m.17698; PMI_026995	S26; S26	YES_CHICK_Tyrosine-protein_kinase_Yes; AAS01045.1 Src family tyrosine kinase [Patiria miniata] (id=99.63%; len=268; e=0.00E+00)	DSNDMGSPGMKIT; DSNDMGSPGMKIT	2,3	2.486	0.6298	0.024358	1	7	2	3	14	S26; S26	0.074904	0.741451	0.851521	0.850895	0.816841	0.859065	0.838544	0.0369978	FC	0.0279518	0.0891609	0.976954	0.0166498	0.000377411
PMI_000263; Pmi_670130_DNMT1_PARLI_DNA_(cytosine-5)-methyltransferase_PliMCI|m.31757	S134; S134	AFR91943.1 DNA cytosine-5-methyltransferase 1 [Patiria pectinifera] (id=95.74%; len=1619; e=0.00E+00) ; DNMT1_PARLI_DNA_(cytosine-5)-methyltransferase_PliMCI	EDTTSQSEDDMDT; EDTTSQSEDDMDT	3,4	3.621	0.7995	0.061368	0.99999	1	1	1		S134; S134	0.0655187	0.334979	0.850596	0.833011	0.737182	0.945694	0.93659	0.00590376	FC
PMI_013445	T710	XP_022090983.1 TOG array regulator of axonemal microtubules protein 1-like isoform X1 [Acanthaster planci] (id=85.07%; len=1279; e=0.00E+00)	PPVAGVTPKKKKP	2,3,4	2.884	0.6024	0.342413	1	3	2	2	2	T710	0.129843	0.834802	0.857111	0.654259	0.632068	1	0.983603	0.000401082	FC	0.381504	0.626329	0.943579	0.0185427	0.000783772
Pmi_653880_AXP83_CIOIN_Axonemal_84_kDa_protein|m.26446; 75116|m.50196	T346; T346	AXP83_CIOIN_Axonemal_84_kDa_protein; XP_022108641.1 axonemal 84 kDa protein-like isoform X4 [Acanthaster planci] (id=88.64%; len=748; e=0.00E+00)	DEQKPPTPSKTPQ; DEQKPPTPSKTPQ	4,5	4.528	0.7036	0.472678	0.99993	3	2	1		T346; T346	0.14779	0.576586	0.748429	0.731365	0.783326	1	0.966888	0.00162644	FC
77661|m.52082; 77666|m.52092; 77660|m.52074; 77652|m.52054; 77667|m.52100	S347; S934; S1078; S989; S1023	XP_022097947.1 neuroblast differentiation-associated protein AHNAK-like [Acanthaster planci] (id=42.76%; len=856; e=1.78E-125) ; XP_022097945.1 vesicle-associated protein-like, partial [Acanthaster planci] (id=67.66%; len=535; e=6.52E-175) ; XP_022097945.1 vesicle-associated protein-like, partial [Acanthaster planci] (id=71.09%; len=640; e=0.00E+00) ; XP_022097945.1 vesicle-associated protein-lik…	SGLGGISPPDVGA; SGLGGISPPDVGA; SGLGGISPPDVGA; SGLGGISPPDVGA; SGLGGISPPDVGA	3,4,5	7.561	0.7044	0.004925	1	7	6	5	1	S347; S934; S1078; S989; S1023	0.154462	0.475179	0.884808	0.810982	0.75357	1	0.994698	4.20885e-05	FC	0.156857	0.203986	0.872285	0.0705297	0.0262278
PMI_008146; Pmi_654310_RBP1_RAT_RalA-binding_protein_1|m.26508	S430; S71	XP_022090713.1 ralA-binding protein 1-like isoform X2 [Acanthaster planci] (id=77.35%; len=755; e=0.00E+00) ; RBP1_RAT_RalA-binding_protein_1	PADVQPSADEETP; PADVQPSADEETP	2,3	4.363	0.6479	0.325953	1	2	2	2	2	S430; S71	0.117322	0.15797	0.453638	0.751266	0.794686	1	0.996827	1.50851e-05	FC	0.53975	0.702505	0.944267	0.000808446	0.00226745
PMI_013390; 82596|m.55530; Pmi_671190_MLL1_MOUSE_Histone-lysine_N-methyltransferase_MLL|m.32133	S3403; S2487; S2359	XP_022099200.1 uncharacterized protein LOC110983880 isoform X1 [Acanthaster planci] (id=56.98%; len=5060; e=0.00E+00) ; XP_022099202.1 uncharacterized protein LOC110983880 isoform X3 [Acanthaster planci] (id=56.52%; len=2799; e=0.00E+00) ; MLL1_MOUSE_Histone-lysine_N-methyltransferase_MLL	NSAKSKSLPNTPS; NSAKSKSLPNTPS; NSAKSKSLPNTPS	3	1.414	0.3477	0.085312	1	1	1	1		S3403; S2487; S2359	0.120019	0.138576	0.154668	0.450882	0.416744	1	0.997197	1.1778e-05	FC
PMI_021192; PMI_006951; Pmi_543852_MPDZ_HUMAN_Multiple_PDZ_domain_protein|m.9094; 15459|m.10278; 15460|m.10280	S981; S1171; S205; S174; S174	XP_022092288.1 multiple PDZ domain protein-like isoform X3 [Acanthaster planci] (id=73.16%; len=1032; e=0.00E+00) ; XP_022092288.1 multiple PDZ domain protein-like isoform X3 [Acanthaster planci] (id=73.71%; len=1339; e=0.00E+00) ; MPDZ_HUMAN_Multiple_PDZ_domain_protein; XP_022092288.1 multiple PDZ domain protein-like isoform X3 [Acanthaster planci] (id=78.34%; len=337; e=3.07E-163) ; XP_02209228…	LASVALSPVSVAP; LASVALSPVSVAP; LASVALSPVSVAP; LASVALSPVSVAP; LASVALSPVSVAP	3	4.537	0.7249	0.000245	1	1	2	1	2	S981; S1171; S205; S174; S174	0.142849	0.625258	0.939295	0.922497	0.815601	0.988663	0.973647	0.0010326	FC	0	0	0.957499	#DIV/0!	0.000661699
Pmi_644627_no_annot|m.23964; 80751|m.54301	S246; S210	no_annot; XP_022101651.1 la-related protein 4-like isoform X2 [Acanthaster planci] (id=72.71%; len=524; e=0.00E+00)	EVPKPPSPQIDLA; EVPKPPSPQIDLA	3,4	3.674	0.7191	0.059119	1	13	15	14	17	S246; S210	0.123044	0.251431	0.700693	0.787407	0.781402	1	0.992489	8.44127e-05	FC	0.200255	0.223314	0.946124	0.350729	0.0018648
PMI_008007; Pmi_669602_INCE_HUMAN_Inner_centromere_protein|m.31527; 81692|m.54875	S688; S686; S707	XP_022102002.1 inner centromere protein A-like [Acanthaster planci] (id=73.61%; len=1171; e=0.00E+00) ; INCE_HUMAN_Inner_centromere_protein; XP_022102002.1 inner centromere protein A-like [Acanthaster planci] (id=68.90%; len=820; e=0.00E+00)	GKQQESSPEKQDT; GKQQESSPEKQDT; GKQQESSPEKQDT	3,4	3.134	0.5827	0.20546	0.99726	1	2	1		S688; S686; S707	0.107685	0.794594	0.66878	0.812556	0.708452	1	0.98626	0.000281902	FC
PMI_010782	S137	XP_022086329.1 rab proteins geranylgeranyltransferase component A 2-like [Acanthaster planci] (id=73.43%; len=350; e=5.69E-146)	IVPPRLSTSDEEP	2,3,4	3.589	0.7605	0.036659	0.99692	5	8	7	6	S137	0.189787	0.608435	0.913378	0.915384	0.786713	0.987407	0.98475	0.00034708	FC	0.176255	0.346713	0.975312	0.00305487	1.47898e-05
Pmi_575852_PTN12_MOUSE_Tyrosine-protein_phosphatase_non-receptor_type_12|m.12010; PMI_016858	S1023; S927	PTN12_MOUSE_Tyrosine-protein_phosphatase_non-receptor_type_12; XP_022082476.1 uncharacterized protein LOC110974871 isoform X1 [Acanthaster planci] (id=67.11%; len=1049; e=0.00E+00)	RVPKPKSPPPPPS; RVPKPKSPPPPPS	2,3	3.086	0.4845	0.087017	1	2	2	2		S1023; S927	0.150184	0.657553	0.91046	0.820241	0.761132	1	0.979052	0.000653634	FC
Pmi_660932_ACTN_DROME_Alpha-actinin,_sarcomeric|m.28540; 69825|m.46661; PMI_010488	S449; S449; S419	ACTN_DROME_Alpha-actinin,_sarcomeric; XP_022105570.1 uncharacterized protein LOC110987173 isoform X2 [Acanthaster planci] (id=63.35%; len=1479; e=0.00E+00) ; XP_022105570.1 uncharacterized protein LOC110987173 isoform X2 [Acanthaster planci] (id=60.53%; len=1477; e=0.00E+00)	GNQGETSPGDEQS; GNQGETSPGDEQS; GNQGETSPGDEQS	3	4.123	0.7192	0.112563	0.99999	1	2	2		S449; S449; S419	0.124325	0.578383	0.809318	0.894279	0.734629	1	0.969142	0.00141367	FC
Pmi_565630_ATG12_RAT_Ubiquitin-like_protein_ATG12|m.10920; 70496|m.47038	S39; S45	ATG12_RAT_Ubiquitin-like_protein_ATG12; XP_022080545.1 autophagy protein 12-like [Acanthaster planci] (id=76.69%; len=133; e=4.14E-69)	EDATVTSPVKKKN; EDATVTSPVKKKN	2,3,4,5	3.397	0.6251	0.025941	1	5	8	6		S39; S45	0.146765	0.729255	0.819154	0.802807	0.707462	1	0.998026	5.84399e-06	FC
30598|m.22055; Pmi_656930_MYO5A_CHICK_Unconventional_myosin-Va|m.27277; PMI_020314; 30599|m.22056	S202; S144; S170; S202	XP_022081870.1 unconventional myosin-Va-like isoform X6 [Acanthaster planci] (id=88.07%; len=763; e=0.00E+00) ; MYO5A_CHICK_Unconventional_myosin-Va; XP_022081868.1 unconventional myosin-Va-like isoform X4 [Acanthaster planci] (id=81.89%; len=646; e=0.00E+00) ; XP_022081867.1 unconventional myosin-Va-like isoform X3 [Acanthaster planci] (id=83.95%; len=810; e=0.00E+00)	RYNGEDSPDSGVS; RYNGEDSPDSGVS; RYNGEDSPDSGVS; RYNGEDSPDSGVS	2,3	3.178	0.7074	0.081559	1	4	4	4	2	S202; S144; S170; S202	0.132026	0.397962	0.902127	0.771938	0.780178	1	0.939261	0.00542175	FC	0.285745	0.277762	0.95633	0.865063	0.00213013
Pmi_669070_DLG1_HUMAN_Disks_large_homolog_1|m.31508; 80673|m.54228; 80674|m.54231	S154; S154; S141	DLG1_HUMAN_Disks_large_homolog_1; XP_022095168.1 disks large homolog 1-like isoform X1 [Acanthaster planci] (id=91.09%; len=954; e=0.00E+00) ; XP_022095169.1 disks large homolog 1-like isoform X2 [Acanthaster planci] (id=90.97%; len=941; e=0.00E+00)	VTQTTVSPVEPSP; VTQTTVSPVEPSP; VTQTTVSPVEPSP	4,5	4.71	0.6774	0.450457	1	1	1	1	2	S154; S154; S141	0.101966	0.262499	0.620964	0.592985	0.683793	1	0.937044	0.00582041	FC	0.109978	0.173056	0.888507	0.125551	0.0053644
Pmi_668540_no_annot|m.31095	S471	no_annot	EPPTQVSPSPAPP	3,4	4.154	0.7292	0.241554	1	9	8	7	6	S471	0.13156	0.448663	0.865876	0.884617	0.774772	0.984966	0.977	0.000787394	FC	0.252566	0.28824	0.965632	0.284869	0.000757275
63372|m.41886; 63375|m.41890; Pmi_666533_NSD2_HUMAN_Probable_histone-lysine_N-methyltransferase_NSD2|m.30369	S15; S15; S31	XP_022091753.1 histone-lysine N-methyltransferase NSD2-like [Acanthaster planci] (id=81.18%; len=170; e=9.07E-76) ; XP_022091753.1 histone-lysine N-methyltransferase NSD2-like [Acanthaster planci] (id=84.90%; len=1066; e=0.00E+00) ; NSD2_HUMAN_Probable_histone-lysine_N-methyltransferase_NSD2	RQVQEASPDSDVV; RQVQEASPDSDVV; RQVQEASPDSDVV	2,3,4	3.626	0.6566	0.071348	1	5	5	5	5	S15; S15; S31	0.123634	0.287822	0.363853	0.593114	0.628853	1	0.993503	6.31851e-05	FC	0.541601	0.668663	0.981005	0.00691472	3.04546e-05
PMI_004363; Pmi_625863_no_annot|m.19647	S1770; S58	XP_022103700.1 LOW QUALITY PROTEIN: baculoviral IAP repeat-containing protein 6-like [Acanthaster planci] (id=81.70%; len=1940; e=0.00E+00) ; no_annot	GATAKTSPGQGAV; GATAKTSPGQGAV	2,3	2.513	0.725	0.288077	1	2	2	3	1	S1770; S58	0.138499	0.486615	0.898255	0.883496	0.760869	1	0.967293	0.00158709	FC	0.391652	0.402329	0.954889	0.785427	0.000171758
50612|m.33817; 50608|m.33814; 50607|m.33813	S225; S225; S228	XP_022094723.1 uncharacterized protein LOC110981448 [Acanthaster planci] (id=50.39%; len=516; e=1.45E-129) ; XP_022094723.1 uncharacterized protein LOC110981448 [Acanthaster planci] (id=50.77%; len=516; e=3.44E-133) ; XP_022094723.1 uncharacterized protein LOC110981448 [Acanthaster planci] (id=50.29%; len=517; e=5.27E-132)	VSSDKSSPIFSAR; VSSDKSSPIFSAR; VSSDKSSPIFSAR	3	4.093	0.7403	0.21721	0.9959	1	2	2		S225; S225; S228	0.106694	0.428813	0.628919	0.756165	0.710645	1	0.989601	0.000161641	FC
PMI_000305; 37047|m.25657	S197:T198; S94:T95	XP_022091664.1 coiled-coil domain-containing protein R3HCC1L-like [Acanthaster planci] (id=49.55%; len=561; e=1.61E-125) ; XP_022091664.1 coiled-coil domain-containing protein R3HCC1L-like [Acanthaster planci] (id=56.87%; len=633; e=0.00E+00)	QRDRKISTDGEEG,RDRKISTDGEEGE; QRDRKISTDGEEG,RDRKISTDGEEGE	3,4	3.779	0.6716	0.038572	1	2	1	1		S197:T198; S94:T95	0.117965	0.260662	0.482142	0.469997	0.591978	1	0.990745	0.000128091	FC
12346|m.7788; Pmi_668321_ARHGC_HUMAN_Rho_guanine_nucleotide_exchange_factor_12|m.31058; 12347|m.7789	S102; S102; S102	XP_022109351.1 rho guanine nucleotide exchange factor 12-like [Acanthaster planci] (id=81.29%; len=310; e=0.00E+00) ; ARHGC_HUMAN_Rho_guanine_nucleotide_exchange_factor_12; XP_022109351.1 rho guanine nucleotide exchange factor 12-like [Acanthaster planci] (id=81.29%; len=310; e=0.00E+00)	KNQSPLSPPHQGN; KNQSPLSPPHQGN; KNQSPLSPPHQGN	3,4	2.124	0.6139	0.810477	1	1	1	1	4	S102; S102; S102	0.139716	0.677842	0.923826	0.742805	0.718312	0.970582	0.987492	0.000233704	FC	0.135931	0.196531	0.9723	0.0188898	0.000572821
PMI_018433; PMI_017874; Pmi_663970_DGKZ_HUMAN_Diacylglycerol_kinase_zeta|m.29531	S792; S729; S726	XP_022111889.1 diacylglycerol kinase zeta-like isoform X5 [Acanthaster planci] (id=96.11%; len=1028; e=0.00E+00) ; XP_022111889.1 diacylglycerol kinase zeta-like isoform X5 [Acanthaster planci] (id=91.35%; len=1041; e=0.00E+00) ; DGKZ_HUMAN_Diacylglycerol_kinase_zeta	TKPSNLSPESKSG; TKPSNLSPESKSG; TKPSNLSPESKSG	2,3	2.367	0.5425	0.639677	1	3	2	3	1	S792; S729; S726	0.124616	0.48718	0.827551	0.74922	0.70417	1	0.990661	0.000130429	FC	0.238985	0.264287	0.94112	0.414559	0.000954813
77652|m.52054; 77661|m.52082; 77660|m.52074	S557; S25; S646	XP_022097945.1 vesicle-associated protein-like, partial [Acanthaster planci] (id=67.66%; len=535; e=2.93E-174) ; XP_022097947.1 neuroblast differentiation-associated protein AHNAK-like [Acanthaster planci] (id=42.76%; len=856; e=1.78E-125) ; XP_022097945.1 vesicle-associated protein-like, partial [Acanthaster planci] (id=71.09%; len=640; e=0.00E+00)	GPDVDVSPPTIGG; GPDVDVSPPTIGG; GPDVDVSPPTIGG	2,3,4	5.371	0.7409	0.011236	1	28	27	31	20	S557; S25; S646	0.130094	0.509765	0.897534	0.808438	0.735645	1	0.991536	0.000107157	FC	0.129204	0.16683	0.981722	7.74208e-05	0.000130941
64188|m.42570; 64183|m.42558; 64187|m.42566; 64184|m.42562; Pmi_660000_F161A_XENLA_Protein_FAM161A|m.28230	S448; S449; S449; S448; S344	XP_022104827.1 protein FAM161B-like [Acanthaster planci] (id=80.69%; len=834; e=0.00E+00) ; XP_022104827.1 protein FAM161B-like [Acanthaster planci] (id=80.84%; len=835; e=0.00E+00) ; XP_022104827.1 protein FAM161B-like [Acanthaster planci] (id=80.60%; len=835; e=0.00E+00) ; XP_022104827.1 protein FAM161B-like [Acanthaster planci] (id=80.94%; len=834; e=0.00E+00) ; F161A_XENLA_Protein_FAM161A	KHRRSKSLPLTQA; KHRRSKSLPLTQA; KHRRSKSLPLTQA; KHRRSKSLPLTQA; KHRRSKSLPLTQA	2,3,4	2.477	0.5036	0.05903	1	2	4	4	3	S448; S449; S449; S448; S344	0.145754	0.802586	0.919296	0.78871	0.709012	1	0.987138	0.000247074	FC	0.208362	0.693234	0.980009	0.00290559	1.83583e-05
Pmi_582130_no_annot|m.12772; 67158|m.44854; PMI_023912	S139; S446; S184	no_annot; XP_022097067.1 BSD domain-containing protein 1-like [Acanthaster planci] (id=65.04%; len=492; e=0.00E+00) ; XP_022097067.1 BSD domain-containing protein 1-like [Acanthaster planci] (id=53.41%; len=176; e=1.74E-31)	ASNKDSSLSDDWE; ASNKDSSLSDDWE; ASNKDSSLSDDWE	2,3	2.077	0.5701	0.561886	0.99792	1	2	2		S139; S446; S184	0.17001	0.543053	0.786337	0.669054	0.808625	0.996476	0.910207	0.0117321	FC
PMI_017922; 16801|m.11505; Pmi_615380_CCDC6_HUMAN_Coiled-coil_domain-containing_protein_6|m.17584; 16800|m.11502; PMI_010006	S102:S104:S107; S296:S298:S301; S295:S297:S300; S296:S298:S301; S253:S255:S258	XP_022096426.1 coiled-coil domain-containing protein 6-like isoform X4 [Acanthaster planci] (id=94.40%; len=232; e=9.71E-147) ; XP_022096426.1 coiled-coil domain-containing protein 6-like isoform X4 [Acanthaster planci] (id=93.59%; len=390; e=0.00E+00) ; CCDC6_HUMAN_Coiled-coil_domain-containing_protein_6; XP_022096267.1 coiled-coil domain-containing protein 6-like isoform X2 [Acanthaster planci]…	ALSRHLSESESSL,SRHLSESESSLEM,LSESESSLEMDDE; ALSRHLSESESSL,SRHLSESESSLEM,LSESESSLEMDDE; ALSRHLSESESSL,SRHLSESESSLEM,LSESESSLEMDDE; ALSRHLSESESSL,SRHLSESESSLEM,LSESESSLEMDDE; ALSRHLSESESSL,SRHLSESESSLEM,LSESESSLEMDDE	2,3	3.391	0.7563	0.003833	1	5	5	7		S102:S104:S107; S296:S298:S301; S295:S297:S300; S296:S298:S301; S253:S255:S258	0.129665	0.507695	0.664002	0.661307	0.621091	1	0.943109	0.0047628	FC
Pmi_671200_SLX4_MOUSE_Structure-specific_endonuclease_subunit_SLX4|m.32202; 79400|m.53306	S1265:S1271; S652:S658	SLX4_MOUSE_Structure-specific_endonuclease_subunit_SLX4; XP_022084380.1 uncharacterized protein LOC110975854 [Acanthaster planci] (id=55.57%; len=1920; e=0.00E+00)	VHVKRLSNDLSVS,SNDLSVSPLKEKH; VHVKRLSNDLSVS,SNDLSVSPLKEKH	4	1.43	0.4835	0.449338	0.99648	1	1	1		S1265:S1271; S652:S658	0.133838	0.517911	0.90201	0.792052	0.699445	0.960623	0.986502	0.000272062	FC
PMI_006935; Pmi_637111_NU188_HUMAN_Nucleoporin_NUP188_homolog|m.22082; 35763|m.24952	S1555; S1812; S457	XP_022109784.1 nucleoporin NUP188 homolog isoform X1 [Acanthaster planci] (id=73.54%; len=1727; e=0.00E+00) ; NU188_HUMAN_Nucleoporin_NUP188_homolog; XP_022109784.1 nucleoporin NUP188 homolog isoform X1 [Acanthaster planci] (id=86.25%; len=502; e=0.00E+00)	RGGGPSSPSSASP; RGGGPSSPSSASP; RGGGPSSPSSASP	2,3	4.889	0.6858	0.005105	0.99995	2	2	3	5	S1555; S1812; S457	0.171657	0.169437	0.214722	0.640122	0.806998	1	0.983809	0.000391122	FC	0.848016	0.98868	0.552664	0.00292407	0.0019663
Pmi_608740_MPND_MOUSE_MPN_domain-containing_protein|m.16539; 73317|m.49054; 73312|m.49050; PMI_011554; 73316|m.49052	S182; S156; S156; S184; S156	MPND_MOUSE_MPN_domain-containing_protein; XP_022112254.1 MPN domain-containing protein-like isoform X1 [Acanthaster planci] (id=88.72%; len=470; e=0.00E+00) ; XP_022112254.1 MPN domain-containing protein-like isoform X1 [Acanthaster planci] (id=88.51%; len=470; e=0.00E+00) ; XP_022112254.1 MPN domain-containing protein-like isoform X1 [Acanthaster planci] (id=89.31%; len=496; e=0.00E+00) ; XP_022…	EEGVHRSPADKPN; EEGVHRSPADKPN; EEGVHRSPADKPN; EDGIHRSPADKPN; EEGVHRSPADKPN	3,4	3.076	0.7305	1.00743	1	2	1	1		S182; S156; S156; S184; S156	0.137975	0.359835	0.747993	0.702838	0.67578	1	0.937836	0.00567639	FC
43157|m.29095; 43160|m.29100; Pmi_658421_ZFP26_MOUSE_Zinc_finger_protein_26|m.27852	S38; S461; S2227	XP_022094426.1 uncharacterized protein LOC110981280 [Acanthaster planci] (id=60.00%; len=535; e=0.00E+00) ; XP_022094426.1 uncharacterized protein LOC110981280 [Acanthaster planci] (id=56.98%; len=974; e=0.00E+00) ; ZFP26_MOUSE_Zinc_finger_protein_26	APSLEVSPENTQA; APSLEVSPENTQA; APSLEVSPENTQA	3,4	5.424	0.6075	0.209673	1	2	2	2	1	S38; S461; S2227	0.16192	0.0437705	0.0494623	0.487738	0.398852	1	0.993217	6.88601e-05	FC	0.859814	0.706397	0.301219	0.151102	0.00566607
PMI_002531	S536	XP_022090239.1 vacuolar protein sorting-associated protein 13D-like isoform X2 [Acanthaster planci] (id=88.36%; len=3584; e=0.00E+00)	SQTPGFSFSDGDS	3	3.568	0.6043	1.01302	1	1	1	1		S536	0.11892	0.61078	0.500218	0.602938	0.722585	1	0.905161	0.0130651	FC
26585|m.19833; PMI_013519	T184; T634	XP_022087074.1 inositol hexakisphosphate and diphosphoinositol-pentakisphosphate kinase 2-like isoform X7 [Acanthaster planci] (id=73.30%; len=221; e=1.62E-93) ; XP_022087074.1 inositol hexakisphosphate and diphosphoinositol-pentakisphosphate kinase 2-like isoform X7 [Acanthaster planci] (id=81.32%; len=819; e=0.00E+00)	TQNGARTPETFTP; TQNGARTPETFTP	2,3,4	6.584	0.7816	0.194321	1	2	2	2	2	T184; T634	0.177665	0.222404	0.322404	0.871333	0.726452	1	0.985942	0.000295035	FC	0.900095	0.94266	0.873759	0.585749	0.65595
24250|m.18422; Pmi_607690_ZMYM3_HUMAN_Zinc_finger_MYM-type_protein_3|m.16357	S292; S292	XP_022082546.1 zinc finger MYM-type protein 3-like isoform X1 [Acanthaster planci] (id=74.13%; len=1747; e=0.00E+00) ; ZMYM3_HUMAN_Zinc_finger_MYM-type_protein_3	EEKMETSLENVDH; EEKMETSLENVDH	3,4	3.289	0.6649	0.661515	0.99623	1	1	2	1	S292; S292	0.10651	0.407873	0.792199	0.661296	0.817293	1	0.960857	0.00226823	FC	0.548021	0.571909	0.984437	0.788595	0.000909561
PMI_028412	S4	XP_022082548.1 zinc finger MYM-type protein 4-like isoform X3 [Acanthaster planci] (id=61.22%; len=263; e=6.72E-66)	---METSLENVDH	3	3.289	0.6649	0.661515	0.99623	1	1	2		S4	0.10651	0.407873	0.792199	0.661296	0.817293	1	0.960857	0.00226823	FC
81840|m.55005; PMI_026206; PMI_011196	S263; S157; S236	XP_022085838.1 ras-related protein Rab-34-like [Acanthaster planci] (id=89.61%; len=260; e=9.64E-175) ; XP_022085838.1 ras-related protein Rab-34-like [Acanthaster planci] (id=70.17%; len=181; e=1.72E-82) ; XP_022085838.1 ras-related protein Rab-34-like [Acanthaster planci] (id=88.85%; len=260; e=4.83E-174)	KKISVSSGSNLIK; KKISVSSGSNLIK; KKISVSSGSNLIK	2,3	2.605	0.4848	0.122112	0.99841	2	1	2	1	S263; S157; S236	0.140525	0.618832	0.820584	0.843879	0.793749	1	0.976128	0.000848027	FC	0.157149	0.266101	0.980907	0.00884117	9.29235e-05
77667|m.52100; 77666|m.52092	S646; S557	XP_022097945.1 vesicle-associated protein-like, partial [Acanthaster planci] (id=71.09%; len=640; e=0.00E+00) ; XP_022097945.1 vesicle-associated protein-like, partial [Acanthaster planci] (id=67.66%; len=535; e=6.52E-175)	GPDVDVSPPTIGG; GPDVDVSPPTIGG	2,3,4	5.371	0.7409	0.006996	1	30	28	32	20	S646; S557	0.131826	0.51341	0.900448	0.80864	0.736971	1	0.990881	0.000124357	FC	0.130446	0.163553	0.974857	0.0141752	0.00029948
PMI_016740; Pmi_622321_no_annot|m.18911; 26605|m.19859	T358:S360; T441:S443; T420:S422	XP_022104110.1 ribosomal RNA processing protein 1 homolog B-like [Acanthaster planci] (id=51.18%; len=424; e=1.55E-99) ; no_annot; XP_022104110.1 ribosomal RNA processing protein 1 homolog B-like [Acanthaster planci] (id=52.53%; len=493; e=1.80E-116)	ATPTFKTPSPKII,PTFKTPSPKIIKE; ATPTFKTPSPKII,PTFKTPSPKIIKE; ATPTFKTPSPKII,PTFKTPSPKIIKE	3,4	1.997	0.5631	0.543833	1	2	1	1		T358:S360; T441:S443; T420:S422	0.131622	0.0368817	0.0627999	0.595385	0.254923	1	0.964864	0.00183013	FC
PMI_017021; Pmi_618741_NOLC1_RAT_Nucleolar_and_coiled-body_phosphoprotein_1|m.18249; 62218|m.41119	S309; S306; S49	XP_022080048.1 nucleolar and coiled-body phosphoprotein 1-like [Acanthaster planci] (id=69.21%; len=367; e=1.92E-85) ; NOLC1_RAT_Nucleolar_and_coiled-body_phosphoprotein_1; XP_022080048.1 nucleolar and coiled-body phosphoprotein 1-like [Acanthaster planci] (id=68.09%; len=210; e=2.42E-18)	KPAAKPSPAPKTQ; KPAAKPSPAPKTQ; KPAAKPSPAPKTQ	2,3,4	1.506	0.6446	0.054294	1	6	1	3		S309; S306; S49	0.104414	0.750602	0.829877	0.804934	0.760894	0.97853	0.923048	0.00865456	FC
Pmi_618490_TTC28_MOUSE_Tetratricopeptide_repeat_protein_28|m.18190; PMI_014634	S268; S361	TTC28_MOUSE_Tetratricopeptide_repeat_protein_28; XP_022094201.1 tetratricopeptide repeat protein 28-like isoform X1 [Acanthaster planci] (id=80.15%; len=796; e=0.00E+00)	EELEPGSPRDFNN; EELEPGSPRDFNN	2,3	4.14	0.7964	0.753097	1	1	1	1	4	S268; S361	0.0903114	0.244556	0.858775	0.931296	0.789044	0.97593	0.98986	0.000153709	FC	0.0784458	0.179249	0.922768	0.0103675	0.00261241
22522|m.17156; Pmi_655380_XIRP2_MOUSE_Xin_actin-binding_repeat-containing_protein_2|m.26813	S22; S484	XP_022096385.1 F-actin-methionine sulfoxide oxidase MICAL3-like isoform X1 [Acanthaster planci] (id=72.32%; len=466; e=0.00E+00) ; XIRP2_MOUSE_Xin_actin-binding_repeat-containing_protein_2	RDDVVRSSEKVDD; RDDVVRSSEKVDD	3,4	2.956	0.6292	0.264248	1	1	2	1		S22; S484	0.0876274	0.134648	0.467636	0.474808	0.541943	1	0.987825	0.000221448	FC
Pmi_666850_TMF1_MOUSE_TATA_element_modulatory_factor|m.30463; 16362|m.11080; 16363|m.11083; PMI_005846	T445; T382; T394; T215	TMF1_MOUSE_TATA_element_modulatory_factor; XP_022093565.1 TATA element modulatory factor-like isoform X2 [Acanthaster planci] (id=71.06%; len=539; e=0.00E+00) ; XP_022093565.1 TATA element modulatory factor-like isoform X2 [Acanthaster planci] (id=70.02%; len=567; e=0.00E+00) ; XP_022093565.1 TATA element modulatory factor-like isoform X2 [Acanthaster planci] (id=74.30%; len=284; e=1.99E-119)	FREGSRTPTQEER; FREGSRTPTQEER; FREGSRTPTQEER; FREGSRTPTQEER	2,3,4	1.715	0.4143	0.196793	0.99752	2	1	2	2	T445; T382; T394; T215	0.147706	0.574178	0.912815	0.854131	0.7747	1	0.974409	0.000973978	FC	0.621378	0.62854	0.874471	0.902108	0.0382795
Pmi_671170_TDRD1_DANRE_Tudor_domain-containing_protein_1|m.32126; 82096|m.55115	T1107; T541	TDRD1_DANRE_Tudor_domain-containing_protein_1; XP_022107965.1 uncharacterized protein LOC110988589 [Acanthaster planci] (id=65.84%; len=1657; e=0.00E+00)	SAEQALTPRSLSY; SAEQALTPRSLSY	2,3	4.001	0.762	0.000181	1	7	5	4	3	T1107; T541	0.129769	0.270191	0.805521	0.84691	0.804426	1	0.9921	9.33706e-05	FC	0.135583	0.209194	0.91317	0.0322955	0.00251092
Pmi_670160_THOC2_MOUSE_THO_complex_subunit_2|m.31763; 80293|m.53875	T1396; T942	THOC2_MOUSE_THO_complex_subunit_2; XP_022086856.1 THO complex subunit 2-like isoform X2 [Acanthaster planci] (id=87.86%; len=1186; e=0.00E+00)	SHKSKRTSAGVEV; SHKSKRTSAGVEV	2	1.733	0.5009	0.175966	0.99748	1	2	1		T1396; T942	0.105849	0.709388	0.852549	0.893887	0.792888	1	0.996602	1.72967e-05	FC
Pmi_633641_MPRIP_MOUSE_Myosin_phosphatase_Rho-interacting_protein|m.21267	S415	MPRIP_MOUSE_Myosin_phosphatase_Rho-interacting_protein	PSPQEKSPREVLP	3,4	3.552	0.7019	0.490481	1	2	2	2	1	S415	0.125778	0.323125	0.128489	0.213431	0.292412	1	0.996187	2.17863e-05	FC	0.910921	0.688558	0.397468	0.024481	0.00279061
PMI_013713; 48273|m.32258; PMI_010102; 48274|m.32261; Pmi_639150_ANK2_MOUSE_Ankyrin-2|m.22530	S573; S167; S740; S167; S188	XP_022079175.1 ankyrin-2-like isoform X5 [Acanthaster planci] (id=77.68%; len=1277; e=0.00E+00) ; XP_022079364.1 ankyrin-2-like isoform X26 [Acanthaster planci] (id=92.30%; len=948; e=0.00E+00) ; XP_022079147.1 ankyrin-2-like isoform X2 [Acanthaster planci] (id=78.14%; len=1441; e=0.00E+00) ; XP_022079364.1 ankyrin-2-like isoform X26 [Acanthaster planci] (id=89.77%; len=948; e=0.00E+00) ; ANK2_MO…	YRSAMLSPTGFDS; YRSAMLSPTGFDS; YRSAMLSPTGFDS; YRSAMLSPTGFDS; YRSAMLSPTGFDS	2,3	2.177	0.6405	0.041024	1	8	4	7	7	S573; S167; S740; S167; S188	0.11141	0.766043	0.860641	0.861679	0.786866	1	0.996833	1.50262e-05	FC	0.124154	0.219417	0.967393	0.0267304	4.7014e-06
43520|m.29338; Pmi_668630_HBS1L_HUMAN_HBS1-like_protein|m.31110; 43523|m.29341; PMI_003663	T484; T611; T15; T611	XP_022088685.1 HBS1-like protein isoform X2 [Acanthaster planci] (id=49.92%; len=641; e=5.87E-136) ; HBS1L_HUMAN_HBS1-like_protein; XP_022088676.1 uncharacterized protein LOC110978193 isoform X1 [Acanthaster planci] (id=65.36%; len=153; e=3.87E-58) ; XP_022088685.1 HBS1-like protein isoform X2 [Acanthaster planci] (id=67.21%; len=1357; e=0.00E+00)	SKTRVPTPPGFQS; SKTRVPTPPGFQS; SKTRVPTPPGFQS; SKTRVPTPPGFQS	3	1.525	0.5797	0.031104	1	2	3	2		T484; T611; T15; T611	0.137987	0.436441	0.922564	0.774032	0.823955	1	0.96511	0.00180473	FC
61196|m.40536; Pmi_635810_CS044_RAT_Uncharacterized_protein_C19orf44_homolog|m.21744	S570; S570	XP_022089174.1 uncharacterized protein C19orf44-like isoform X1 [Acanthaster planci] (id=65.44%; len=845; e=0.00E+00) ; CS044_RAT_Uncharacterized_protein_C19orf44_homolog	FVSQTASPSETRT; FVSQTASPSETRT	3	4.951	0.6579	0.831066	0.99999	1	1	1		S570; S570	0.122923	0.366168	0.376979	0.635831	0.741257	1	0.986375	0.000277192	FC
76050|m.50778; PMI_005116	T756; T756	XP_022103451.1 retinoic acid-induced protein 1-like [Acanthaster planci] (id=83.80%; len=1179; e=0.00E+00) ; XP_022103451.1 retinoic acid-induced protein 1-like [Acanthaster planci] (id=83.30%; len=1132; e=0.00E+00)	PSSQRTTPEKPVA; PSSQRTTPEKPVA	3,4	2.399	0.6214	0.35222	0.99831	2	1	2	1	T756; T756	0.121931	0.634547	0.734851	0.818095	0.767816	1	0.96303	0.00202491	FC	0.33415	0.502782	0.923509	0.0909423	0.00378447
Pmi_620220_LFG2_BOVIN_Protein_lifeguard_2|m.18499; PMI_006279; PMI_021858	S103; S103; S101	LFG2_BOVIN_Protein_lifeguard_2; XP_022106114.1 protein lifeguard 2-like isoform X1 [Acanthaster planci] (id=45.63%; len=423; e=3.78E-84) ; XP_022106114.1 protein lifeguard 2-like isoform X1 [Acanthaster planci] (id=60.38%; len=265; e=3.49E-86)	PRGEAWSPNTGRT; PRGEAWSPNTGRT; PRGEAWSPNTGRT	2	1.298	0.5162	0.252511	1	1	2	1	1	S103; S103; S101	0.0691176	0.623538	0.972295	0.870497	0.739547	0.97601	0.97259	0.00111665	FC	0.0410224	0.100867	0.947476	0.071775	0.001431
PMI_018918; Pmi_670250_no_annot|m.31815; 69759|m.46608	S1628; S1696; S81	XP_022085789.1 uncharacterized protein LOC110976639 isoform X1 [Acanthaster planci] (id=47.67%; len=967; e=0.00E+00) ; no_annot; XP_022085789.1 uncharacterized protein LOC110976639 isoform X1 [Acanthaster planci] (id=43.89%; len=524; e=9.80E-93)	GRGRRLSSSQCNL; GRGRRLSSSQCNL; GRGRRLSSSQCNL	2	2.122	0.4098	0.012652	0.99821	2	2	2	1	S1628; S1696; S81	0.113919	0.801644	0.827968	0.782383	0.74288	1	0.983152	0.000423413	FC	0.184413	0.526892	0.93153	0.0144736	0.000292969
Pmi_616530_RHG32_XENLA_Rho_GTPase-activating_protein_32|m.17840	S334	RHG32_XENLA_Rho_GTPase-activating_protein_32	VNIMPRSPKPVLN	3	1.33	0.3137	0.070073	1	2	2	1		S334	0.119103	0.434905	0.79263	0.745453	0.698435	1	0.99378	5.79046e-05	FC
PMI_007159	S434	XP_022101719.1 rho GTPase-activating protein 100F-like [Acanthaster planci] (id=81.30%; len=936; e=0.00E+00)	RYVPKPSPDKKTR	3,4	2.53	0.5583	0.012351	1	1	1	2	2	S434	0.16695	0.645877	0.810113	0.630236	0.7479	1	0.888969	0.0178073	FC	0.292904	0.340569	0.954976	0.100272	4.81325e-05
Pmi_668713_DLGP5_HUMAN_Disks_large-associated_protein_5|m.31189; 66833|m.44506; 66831|m.44502; PMI_003319	S578; S557; S564; S540	DLGP5_HUMAN_Disks_large-associated_protein_5; XP_022089719.1 disks large-associated protein 5-like [Acanthaster planci] (id=68.17%; len=641; e=0.00E+00) ; XP_022089719.1 disks large-associated protein 5-like [Acanthaster planci] (id=68.37%; len=645; e=0.00E+00) ; XP_022089719.1 disks large-associated protein 5-like [Acanthaster planci] (id=61.53%; len=876; e=0.00E+00)	PHCQAGSPFKTHT; PHCQAGSPFKTHT; PHCQAGSPFKTHT; PHCQAGSPFKTHT	3	2.451	0.6251	0.392201	1	2	1	1		S578; S557; S564; S540	0.152208	0.247765	0.335983	0.315155	0.436765	1	0.959012	0.00248565	FC
PMI_016078; PMI_009989; Pmi_539900_no_annot|m.8786	T358; T324; T294	XP_022093776.1 WD repeat-containing protein 44-like [Acanthaster planci] (id=89.70%; len=602; e=0.00E+00) ; XP_022093776.1 WD repeat-containing protein 44-like [Acanthaster planci] (id=76.63%; len=398; e=4.80E-130) ; no_annot	PRSRGGTPPTEGK; PRSRGGTPPTEGK; PRSRGGTPPTEGK	2,3	1.668	0.4933	0.008382	1	2	3	2	1	T358; T324; T294	0.159326	0.531871	0.93361	0.830863	0.771012	1	0.988642	0.000192773	FC	0.407833	0.392818	0.918738	0.658844	0.00194916
27344|m.20298; Pmi_636930_no_annot|m.22023; 27346|m.20300	S134:S140; S194:S200; S134:S140	XP_022096014.1 serine/threonine-protein kinase Nek4-like isoform X1 [Acanthaster planci] (id=82.80%; len=314; e=2.13E-151) ; no_annot; XP_022096014.1 serine/threonine-protein kinase Nek4-like isoform X1 [Acanthaster planci] (id=84.71%; len=314; e=4.20E-155)	QRSDRPSVGDDDS,SVGDDDSDDSTDA; QRSDRPSVGDDDS,SVGDDDSDDSTDA; QRSDRPSVGDDDS,SVGDDDSDDSTDA	3,4	4.393	0.5802	0.101016	1	3	3	2	8	S134:S140; S194:S200; S134:S140	0.112657	0.80526	0.940808	0.853989	0.77045	0.950949	0.972144	0.00115309	FC	0.445519	0.625632	0.961182	0.0160054	0.00127934
Pmi_624880_no_annot|m.19433	S240:S243	no_annot	DYVLGPSPTSPRT,LGPSPTSPRTNTP	2,3	4.051	0.7099	0.012554	0.9973	4	3	4		S240:S243	0.12675	0.488123	0.30093	0.33072	0.381054	1	0.998254	4.57143e-06	FC
59330|m.39283; Pmi_656150_CCNE_HEMPU_G1/S-specific_cyclin-E|m.27047	S40; S40	BAH97193.1 cyclin E [Patiria pectinifera] (id=90.65%; len=428; e=0.00E+00) ; CCNE_HEMPU_G1/S-specific_cyclin-E	KIREDDSDEELHS; KIREDDSDEELHS	3,4,5	4.12	0.7415	0.075921	1	3	2	2	3	S40; S40	0.157597	0.166549	0.286493	0.315973	0.493299	1	0.985459	0.000315637	FC	0.703575	0.844007	0.94288	0.116721	0.0153898
PMI_026109; Pmi_656630_SAM5B_XENLA_Sorting_and_assembly_machinery_component_50_..CUT|m.27216; PMI_007655	S23; S23; S23	XP_022083590.1 hsp70-binding protein 1-like [Acanthaster planci] (id=67.86%; len=336; e=1.26E-152) ; SAM5B_XENLA_Sorting_and_assembly_machinery_component_50_..CUT; XP_022083590.1 hsp70-binding protein 1-like [Acanthaster planci] (id=79.76%; len=336; e=0.00E+00)	ERRQPRSLEDVLK; QRRQPRSLEDVLK; QRRQPRSLEDVLK	2	1.993	0.2933	0.011642	1	2	2	1	2	S23; S23; S23	0.157467	0.261227	0.721191	0.788908	0.756452	1	0.980987	0.000538782	FC	0.308519	0.447647	0.9768	0.0016097	6.29161e-05
Pmi_665350_MCM4_XENTR_DNA_replication_licensing_factor_mcm4|m.29937; PMI_012325; PMI_011752	S129; S129; S32	MCM4_XENTR_DNA_replication_licensing_factor_mcm4; XP_022092164.1 DNA replication licensing factor mcm4-A-like [Acanthaster planci] (id=90.75%; len=670; e=0.00E+00) ; XP_022092164.1 DNA replication licensing factor mcm4-A-like [Acanthaster planci] (id=86.61%; len=381; e=0.00E+00)	TSDIGMSSPLNYG; TSDIGMSSPLNYG; TSDIGMSSPLNYG	2,3	3.53	0.7708	0.087826	0.99683	2	2	2	3	S129; S129; S32	0.247733	0.373099	0.402842	0.732541	0.694559	0.991282	0.862162	0.0271895	FC	0.801236	0.900777	0.269836	0.476957	0.039945
Pmi_667791_UHRF2_MOUSE_E3_ubiquitin-protein_ligase_UHRF2|m.30816; 49397|m.33017	S776; S776	UHRF2_MOUSE_E3_ubiquitin-protein_ligase_UHRF2; XP_022087295.1 E3 ubiquitin-protein ligase UHRF1-like [Acanthaster planci] (id=82.34%; len=906; e=0.00E+00)	DEVPVSSPKKTKV; DEVPVSSPKKTKV	3,4,5	3.203	0.6179	0.000154	0.99998	5	4	6		S776; S776	0.118446	0.324615	0.645421	0.545621	0.674901	1	0.978554	0.000684974	FC
Pmi_561680_OAR_BOMMO_Octopamine_receptor|m.10589	S234	OAR_BOMMO_Octopamine_receptor	LESFENSPIDKPK	3	2.052	0.538	0.447203	1	1	1	2		S234	0.104894	0.532978	0.880796	0.910254	0.690938	0.97159	0.979299	0.000638344	FC
Pmi_611880_LARP7_HUMAN_La-related_protein_7|m.17032	S393:S396	LARP7_HUMAN_La-related_protein_7	KRKREDSNGSVDS,REDSNGSVDSLKV	2,3,4	1.651	0.4809	0.072717	1	2	1	1		S393:S396	0.13422	0.251654	0.653149	0.68365	0.784452	1	0.985352	0.000320258	FC
Pmi_646993_no_annot|m.24518	S45	no_annot	RKTVTGSPEVEEA	2,3	3.491	0.6851	0.122596	1	5	5	4	2	S45	0.145922	0.70415	0.89648	0.808134	0.75097	1	0.98971	0.000158288	FC	0.146895	0.22341	0.965448	0.0265726	0.000409646
Pmi_632922_PKD2_BOVIN_Polycystin-2|m.21138	S7	PKD2_BOVIN_Polycystin-2	MTTRRVSPRPVTG	3	1.861	0.473	0.110894	1	1	1	1	3	S7	0.149381	0.622383	0.850484	0.842056	0.770681	0.992044	0.887992	0.018116	FC	0.229149	0.289102	0.958031	0.121227	0.001655
PMI_000613; Pmi_634712_PLPL7_MOUSE_Patatin-like_phospholipase_domain-containing_..CUT|m.21490; PMI_007977	S766; S350; S366	XP_022085231.1 neuropathy target esterase-like isoform X1 [Acanthaster planci] (id=82.88%; len=619; e=0.00E+00) ; PLPL7_MOUSE_Patatin-like_phospholipase_domain-containing_..CUT; XP_022085235.1 patatin-like phospholipase domain-containing protein 7 isoform X5 [Acanthaster planci] (id=86.04%; len=1289; e=0.00E+00)	DKKRHVSGDNTVY; DKKRHVSGDNTVY; DKKRHVSGDNTVY	3	6.423	0.7512	0.098679	1	7	6	5	4	S766; S350; S366	0.132001	0.210387	0.640418	0.691588	0.875806	0.991487	0.988667	0.000191924	FC	0.359614	0.514374	0.966339	0.0338321	0.000977844
PMI_008384	S314	XP_022104697.1 unconventional myosin-IXa-like, partial [Acanthaster planci] (id=83.68%; len=827; e=0.00E+00)	FVSQTPSPRSPFP	2,3	3.343	0.7216	0.125943	1	1	2	2	1	S314	0.160596	0.770846	0.919099	0.87267	0.915904	0.922995	0.950868	0.0035617	FC	0.894086	0.884194	0.988328	0.802585	0.00679849
PMI_009360	S28	XP_022081718.1 dynein heavy chain 5, axonemal-like isoform X1 [Acanthaster planci] (id=82.69%; len=520; e=0.00E+00)	ESSKPDSPKPDQE	4,5	4.603	0.687	0.035257	1	1	1	3	2	S28	0.173812	0.407544	0.768103	0.828857	0.768012	1	0.934454	0.00630371	FC	0.213567	0.23193	0.869311	0.81726	0.0132842
[truncated: 32,209 more rows]
