# Supplementary figures and images for: Selective dephosphorylation by PP2A-B55 directs the meiosis I-meiosis II transition in oocytes
Source: eLife journal article supplement (doi:10.7554/elife.70588), 2021-08-03

Figure 4-S1-source data 2

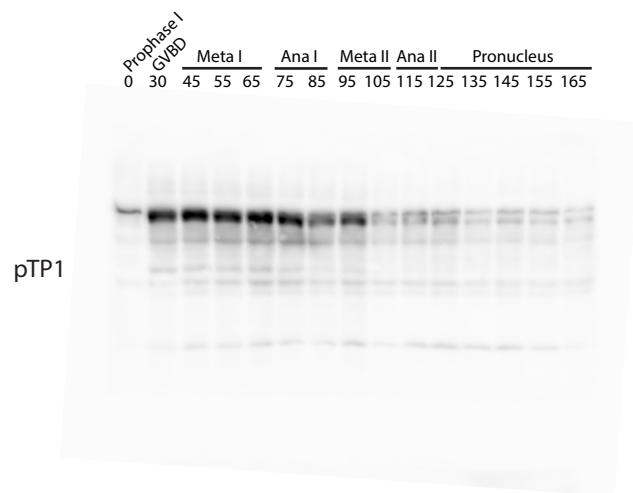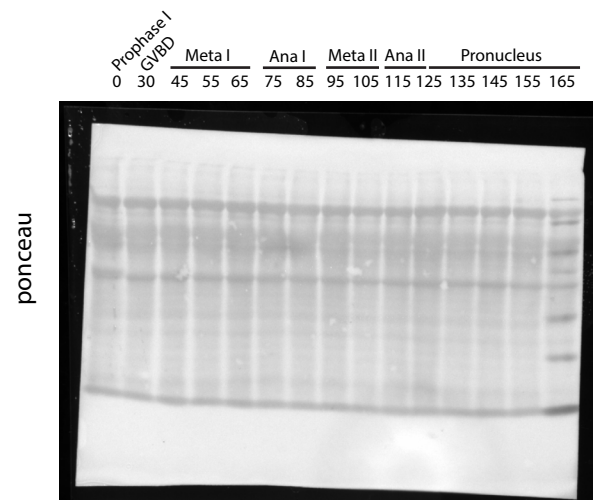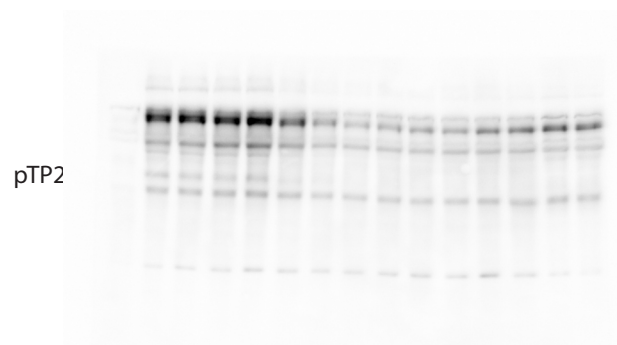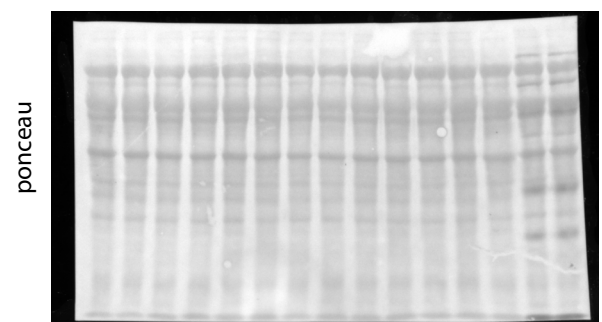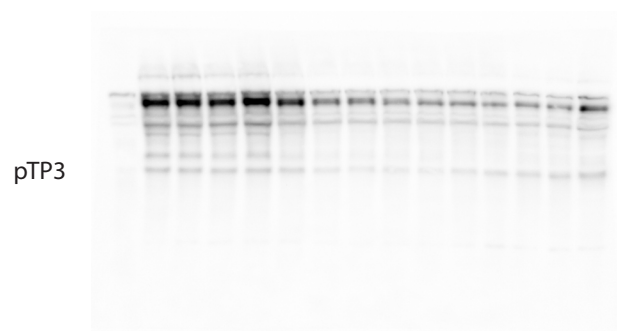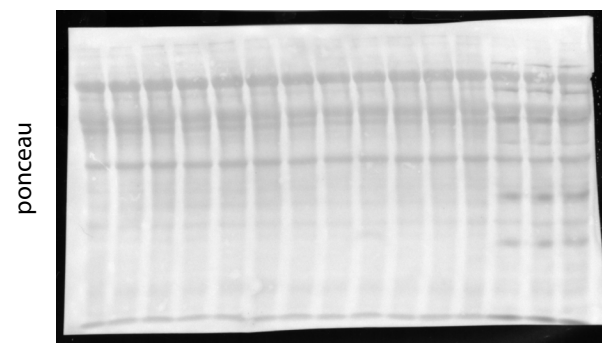

Supplement: fig4-figsupp1-data1 [file elife-70588-fig4-figsupp1-data1-v2.zip]
